# Supplementary material for: Stereoselective synthesis and antiproliferative activity of allo-gibberic acid-based 1,3-aminoalcohol regioisomers
Source: Royal Society of Chemistry journal article supplement (doi:10.1039/d3md00665d), 2024-01-01

## Supplementary data

### **Stereoselective synthesis and antiproliferative activity of *allo*-gibberic acid-based 1,3-aminoalcohols regioisomers**

**Zein Alabdeen Khdar,<sup>a</sup> Tam Minh Le,<sup>a,b</sup> Zsuzsanna Schelz,<sup>c</sup> István Zupkó<sup>c</sup> and Zsolt Szakonyi<sup>a,\*</sup>**

---

<sup>a.</sup> Institute of Pharmaceutical Chemistry, University of Szeged, H-6720 Szeged, Eötvös utca 6, Hungary.

<sup>b.</sup> HUN-REN–SZTE Stereochemistry Research Group, University of Szeged, H-6720 Szeged, Eötvös u. 6, Hungary.

<sup>c.</sup> Institute of Pharmacodynamics and Biopharmacy, University of Szeged, H-6720 Szeged, Hungary.

\* Correspondence: szakonyi.zsolt@szte.hu; Tel.: +36-62-546809; Fax: +36-62-545705.

## Contents

|                                                                                                        |           |
|--------------------------------------------------------------------------------------------------------|-----------|
| Table S1. Antiproliferative effects of the investigated compounds                                      | S3 – S4   |
| $^1\text{H}$ , $^{13}\text{C}$ , $^{19}\text{F}$ NMR, COSY, NOESY, HSQC, HMBC spectra of new compounds | S5 – S193 |

Table S1: Antiproliferative effects of the investigated compounds

| Compound | Cc<br>μM | Growth inhibition (%) ± SEM<br>Calculated IC <sub>50</sub> (μM)<br>[95%CI] |                               |                            |                               |                            |                               |
|----------|----------|----------------------------------------------------------------------------|-------------------------------|----------------------------|-------------------------------|----------------------------|-------------------------------|
|          |          | HeLa                                                                       | SiHa                          | MCF-7                      | MDA-MB-231                    | A2780                      | NIH/3T3                       |
|          |          |                                                                            |                               |                            |                               |                            |                               |
| 8        | 10       | < 20                                                                       | < 20                          | 51.01 ± 1.01               | < 20                          | 30.44 ± 1.51               | < 20                          |
|          | 30       | 20.64 ± 1.03                                                               | 5.68 ± 8.09                   | 63.75 ± 3.47               | 15.87 ± 2.46                  | 68.53 ± 1.34               | 26.41 ± 1.55                  |
| 9        | 10       | < 20                                                                       | < 20                          | 49.36 ± 1.97               | < 20                          | 28.61 ± 2.28               | < 20                          |
|          | 30       | 90.21 ± 1.35                                                               | 87.21 ± 1.11                  | 88.74 ± 0.75               | 91.79 ± 1.12                  | 96.61 ± 0.32               | 97.04 ± 0.23                  |
| 10       | 10       | 22.03 ± 2.06                                                               | < 20                          | 54.31 ± 2.13               | < 20                          | 38.34 ± 1.09               | < 20                          |
|          | 30       | 91.68 ± 1.02                                                               | 82.31 ± 0.99                  | 89.41 ± 1.09               | 92.30 ± 0.71                  | 96.54 ± 0.47               | 81.75 ± 1.81                  |
| 11       | 10       | < 20                                                                       | < 20                          | 34.99 ± 1.75               | < 20                          | 35.70 ± 1.81               | < 20                          |
|          | 30       | 98.56 ± 1.32                                                               | 98.01 ± 2.95                  | 99.09 ± 0.64               | 80.28 ± 0.58                  | 97.74 ± 0.98               | 97.75 ± 1.42                  |
| 12       | 10       | 73.71 ± 4.03                                                               | < 20                          | 89.89 ± 1.25               | 82.45 ± 1.35                  | 92.72 ± 0.72               | 83.77 ± 3.26                  |
|          | 30       | 90.23 ± 1.46                                                               | 90.15 ± 0.87                  | 96.41 ± 0.85               | 91.98 ± 1.09                  | 96.59 ± 0.55               | 95.93 ± 1.22                  |
|          |          | <b>20.70</b><br>[14.72-29.10]                                              | <b>22.34</b><br>[14.02-35.59] | <b>3.43</b><br>[2.87-4.09] | <b>10.38</b><br>[9.55-11.28]  | <b>6.17</b><br>[4.45-8.55] | <b>6.02</b><br>[5.09-7.11]    |
| 13       | 10       | < 20                                                                       | < 20                          | 75.63 ± 3.89               | < 20                          | 54.23 ± 1.10               | < 20                          |
|          | 30       | 91.76 ± 1.51                                                               | 91.03 ± 1.21                  | 96.58 ± 0.62               | 93.06 ± 1.31                  | 96.99 ± 0.32               | 97.34 ± 0.30                  |
|          |          | <b>18.55</b><br>[14.69-23.43]                                              | <b>22.73</b><br>[15.75-32.81] | <b>7.07</b><br>[5.91-8.46] | <b>19.29</b><br>[15.86-23-46] | <b>4.57</b><br>[3.73-5.59] | <b>14.47</b><br>[12.00-17.45] |
| 14       | 10       | 22.08 ± 2.93                                                               | 21.86 ± 2.03                  | 53.30 ± 1.31               | < 20                          | 35.55 ± 1.57               | < 20                          |
|          | 30       | 81.08 ± 3.99                                                               | 46.02 ± 1.48                  | 90.39 ± 1.08               | 88.02 ± 0.65                  | 96.13 ± 0.59               | 83.41 ± 2.09                  |
| 15       | 10       | < 20                                                                       | < 20                          | 54.92 ± 1.31               | < 20                          | 26.83 ± 2.19               | < 20                          |
|          | 30       | < 20                                                                       | < 20                          | 79.74 ± 0.85               | 64.50 ± 2.35                  | 74.51 ± 3.25               | 75.76 ± 7.06                  |
| 16       | 10       | 92.44 ± 1.30                                                               | 84.17 ± 0.86                  | 92.37 ± 1.54               | 86.55 ± 0.70                  | 96.39 ± 0.71               | 89.85 ± 1.28                  |
|          | 30       | 92.83 ± 1.27                                                               | 83.97 ± 1.31                  | 93.78 ± 1.14               | 87.21 ± 0.53                  | 96.06 ± 0.76               | 93.92 ± 0.54                  |
|          |          | <b>4.01</b><br>[3.44-4.68]                                                 | <b>4.12</b><br>[3.32-5.11]    | <b>3.14</b><br>[2.75-3.59] | <b>4.71</b><br>[3.64-6.09]    | <b>4.57</b><br>[3.73-5.59] | <b>12.95</b><br>[11.85-14.14] |
| 17       | 10       | < 20                                                                       | < 20                          | 37.91 ± 2.19               | < 20                          | < 20                       | < 20                          |
|          | 30       | < 20                                                                       | < 20                          | 45.58 ± 1.18               | 27.22 ± 0.93                  | 33.08 ± 2.09               | 22.29 ± 1.16                  |
| 18       | 10       | 96.46 ± 0.29                                                               | < 20                          | 95.49 ± 0.71               | 92.38 ± 0.98                  | 96.51 ± 0.26               | < 20                          |
|          | 30       | 96.09 ± 0.51                                                               | 96.34 ± 0.59                  | 97.91 ± 0.61               | 93.39 ± 0.98                  | 95.81 ± 0.49               | 99.31 ± 0.14                  |
|          |          | <b>5.06</b><br>[4.68-5.46]                                                 | <b>21.87</b><br>[14.74-32.45] | <b>3.85</b><br>[3.55-4.17] | <b>6.48</b><br>[5.09-8.25]    | <b>5.08</b><br>[4.63-5.59] | <b>19.71</b><br>[14.25-27.26] |
| 19       | 10       | < 20                                                                       | < 20                          | 45.00 ± 4.12               | < 20                          | < 20                       | < 20                          |
|          | 30       | < 20                                                                       | < 20                          | 48.73 ± 3.87               | < 20                          | 38.36 ± 1.37               | < 20                          |
| 20       | 10       | < 20                                                                       | < 20                          | 26.64 ± 0.96               | 21.27 ± 0.72                  | 32.98 ± 3.85               | < 20                          |
|          | 30       | < 20                                                                       | < 20                          | 54.07 ± 1.41               | 40.28 ± 2.31                  | 83.69 ± 1.11               | < 20                          |
| 21       | 10       | < 20                                                                       | 21.18 ± 2.61                  | 26.24 ± 1.38               | < 20                          | < 20                       | < 20                          |
|          | 30       | 29.33 ± 2.22                                                               | 30.01 ± 1.78                  | 43.16 ± 2.59               | 22.37 ± 1.67                  | 39.58 ± 1.98               | < 20                          |
| 26       | 10       | 98.56 ± 0.39                                                               | 97.15 ± 0.65                  | 98.76 ± 0.48               | 95.14 ± 0.51                  | 96.67 ± 0.39               | 99.82 ± 0.11                  |
|          | 30       | 97.58 ± 0.58                                                               | 97.07 ± 0.88                  | 98.35 ± 0.65               | 94.58 ± 0.84                  | 96.59 ± 0.43               | 99.39 ± 0.20                  |
|          |          | <b>5.10</b><br>[4.66-5.59]                                                 | <b>4.36</b><br>[3.62-5.25]    | <b>3.66</b><br>[3.16-4.23] | <b>4.47</b><br>[4.06-4.93]    | <b>4.57</b><br>[4.22-4.95] | <b>4.62</b><br>[4.03-5.29]    |
| 27       | 10       | 96.42 ± 0.44                                                               | 96.22 ± 0.78                  | 97.53 ± 0.23               | 95.86 ± 0.83                  | 95.04 ± 0.98               | 99.84 ± 0.05                  |
|          | 30       | 96.48 ± 0.36                                                               | 95.25 ± 1.77                  | 96.97 ± 0.31               | 95.51 ± 0.85                  | 96.72 ± 0.58               | 99.46 ± 0.14                  |
|          |          | <b>5.83</b><br>[4.72-7.20]                                                 | <b>4.09</b><br>[2.95-5.67]    | <b>3.86</b><br>[3.30-4.51] | <b>5.10</b><br>[4.28-6.08]    | <b>4.53</b><br>[3.91-5.24] | <b>6.25</b><br>[5.31-7.35]    |
| 28       | 10       | 99.55 ± 0.16                                                               | 99.07 ± 0.43                  | 99.20 ± 0.29               | 97.46 ± 0.38                  | 97.65 ± 0.25               | 82.62 ± 1.19                  |
|          | 30       | 98.98 ± 0.26                                                               | 98.45 ± 0.66                  | 99.28 ± 0.31               | 95.93 ± 0.97                  | 96.90 ± 0.42               | 99.47 ± 0.19                  |
|          |          | <b>3.89</b><br>[3.28-4.62]                                                 | <b>3.83</b><br>[2.96-4.96]    | <b>3.40</b><br>[2.91-3.99] | <b>5.17</b><br>[4.39-6.09]    | <b>4.52</b><br>[3.80-5.37] | <b>8.83</b><br>[8.34-9.34]    |
| 29       | 10       | 93.88 ± 0.59                                                               | < 20                          | 91.20 ± 0.93               | 83.84 ± 1.46                  | 70.55 ± 3.61               | 24.48 ± 0.62                  |
|          | 30       | 97.06 ± 0.53                                                               | 95.23 ± 0.98                  | 97.29 ± 0.91               | 95.71 ± 1.15                  | 95.22 ± 1.10               | 99.19 ± 0.23                  |
|          |          | <b>5.51</b><br>[4.34-7.01]                                                 | <b>13.52</b><br>[10.44-17.52] | <b>4.47</b><br>[4.16-4.79] | <b>7.09</b><br>[6.09-8.25]    | <b>7.51</b><br>[6.75-8.35] | <b>13.48</b><br>[12.05-15.08] |
| 30       | 10       | < 20                                                                       | 24.64 ± 0.68                  | 39.43 ± 2.02               | < 20                          | < 20                       | < 20                          |
|          | 30       | 84.87 ± 2.54                                                               | 69.06 ± 3.42                  | 94.82 ± 0.91               | 90.68 ± 0.79                  | 71.96 ± 1.54               | 57.62 ± 3.74                  |
| 31       | 10       | 24.69 ± 1.53                                                               | 71.65 ± 1.82                  | 90.42 ± 1.63               | 75.35 ± 0.29                  | 52.60 ± 1.08               | < 20                          |
|          | 30       | 99.40 ± 0.85                                                               | 99.29 ± 2.05                  | 99.89 ± 0.15               | 82.22 ± 0.18                  | 98.42 ± 0.97               | 99.98 ± 0.23                  |

|    |    |                               |                               |                            |                            |                               |                               |
|----|----|-------------------------------|-------------------------------|----------------------------|----------------------------|-------------------------------|-------------------------------|
| 32 | 10 | < 20                          | < 20                          | 97.19 ± 0.26               | 83.56 ± 1.46               | 26.03 ± 0.92                  | 25.64 ± 2.16                  |
|    | 30 | 97.58 ± 0.56                  | 97.26 ± 0.86                  | 97.53 ± 0.88               | 94.13 ± 0.81               | 96.60 ± 0.40                  | 99.06 ± 0.16                  |
|    |    | <b>18.78</b><br>[14.95-23.59] | <b>8.40</b><br>[5.08-13.88]   | <b>4.40</b><br>[4.03-4.81] | <b>7.71</b><br>[6.89-8.62] | <b>15.03</b><br>[12.50-18.07] | <b>15.17</b><br>[13.48-17.07] |
| 33 | 10 | < 20                          | < 20                          | 96.15 ± 0.29               | 84.12 ± 0.94               | 24.01 ± 0.78                  | 23.56 ± 1.64                  |
|    | 30 | 98.18 ± 0.55                  | 98.73 ± 0.66                  | 99.17 ± 0.38               | 95.72 ± 1.12               | 97.05 ± 0.54                  | 99.56 ± 0.25                  |
|    |    | <b>12.91</b><br>[9.66-17.27]  | <b>17.67</b><br>[14.74-21.19] | <b>4.08</b><br>[3.43-4.86] | <b>6.50</b><br>[6.05-6.98] | <b>13.83</b><br>[9.38-20.40]  | <b>14.74</b><br>[13.77-15.79] |
| 34 | 10 | 98.81 ± 0.36                  | 87.91 ± 3.30                  | 98.52 ± 0.24               | 95.34 ± 0.55               | 88.27 ± 2.73                  | 33.83 ± 1.05                  |
|    | 30 | 98.43 ± 0.37                  | 98.49 ± 0.58                  | 99.13 ± 0.44               | 95.20 ± 0.30               | 96.74 ± 0.24                  | 99.38 ± 0.20                  |
|    |    | <b>4.71</b><br>[3.77-5.88]    | <b>20.55</b><br>[13.43-31.45] | <b>2.42</b><br>[1.90-3.08] | <b>4.99</b><br>[3.58-6.98] | <b>5.39</b><br>[4.40-6.62]    | <b>13.02</b><br>[11.88-14.26] |
| 35 | 10 | 71.86 ± 1.79                  | < 20                          | 97.65 ± 0.30               | 92.18 ± 0.69               | 33.51 ± 1.18                  | 49.95 ± 2.66                  |
|    | 30 | 95.91 ± 0.32                  | 94.97 ± 0.58                  | 97.60 ± 0.53               | 94.79 ± 0.81               | 95.93 ± 0.71                  | 99.58 ± 0.16                  |
| 36 | 10 | < 20                          | 25.03 ± 1.05                  | 39.94 ± 1.63               | < 20                       | < 20                          | < 20                          |
|    | 30 | 26.47 ± 2.06                  | 26.96 ± 2.13                  | 82.56 ± 2.11               | 69.95 ± 1.37               | 86.12 ± 0.68                  | 22.19 ± 2.21                  |
| 37 | 10 | < 20                          | 24.59 ± 0.58                  | 21.14 ± 1.38               | < 20                       | < 20                          | < 20                          |
|    | 30 | 21.38 ± 0.69                  | 27.53 ± 1.89                  | 39.89 ± 2.47               | < 20                       | 21.04 ± 0.76                  | < 20                          |
| 38 | 10 | < 20                          | < 20                          | < 20                       | < 20                       | < 20                          | < 20                          |
|    | 30 | 42.90 ± 3.52                  | 38.70 ± 2.32                  | 92.85 ± 1.02               | 25.63 ± 1.13               | 69.87 ± 0.87                  | 41.81 ± 3.24                  |
| 39 | 10 | < 20                          | < 20                          | 30.74 ± 0.78               | < 20                       | < 20                          | < 20                          |
|    | 30 | 36.10 ± 3.67                  | 26.45 ± 3.51                  | 87.20 ± 1.09               | 32.73 ± 1.32               | 70.26 ± 1.46                  | 40.93 ± 2.43                  |

\*: data from reference 10.3390/ijms24021121 (Bai D, Int J Mol Sci 2023)

<sup>1</sup>H-NMR of ethyl (4*bS*,7*S*,9*aS*,10*R*)-7-(hydroxymethyl)-1-methyl-8-oxo-4*b*,6,7,8,9,10-hexahydro-5*H*-7,9*a*-methanobenzo[*a*]azulene-10-carboxylate **5**

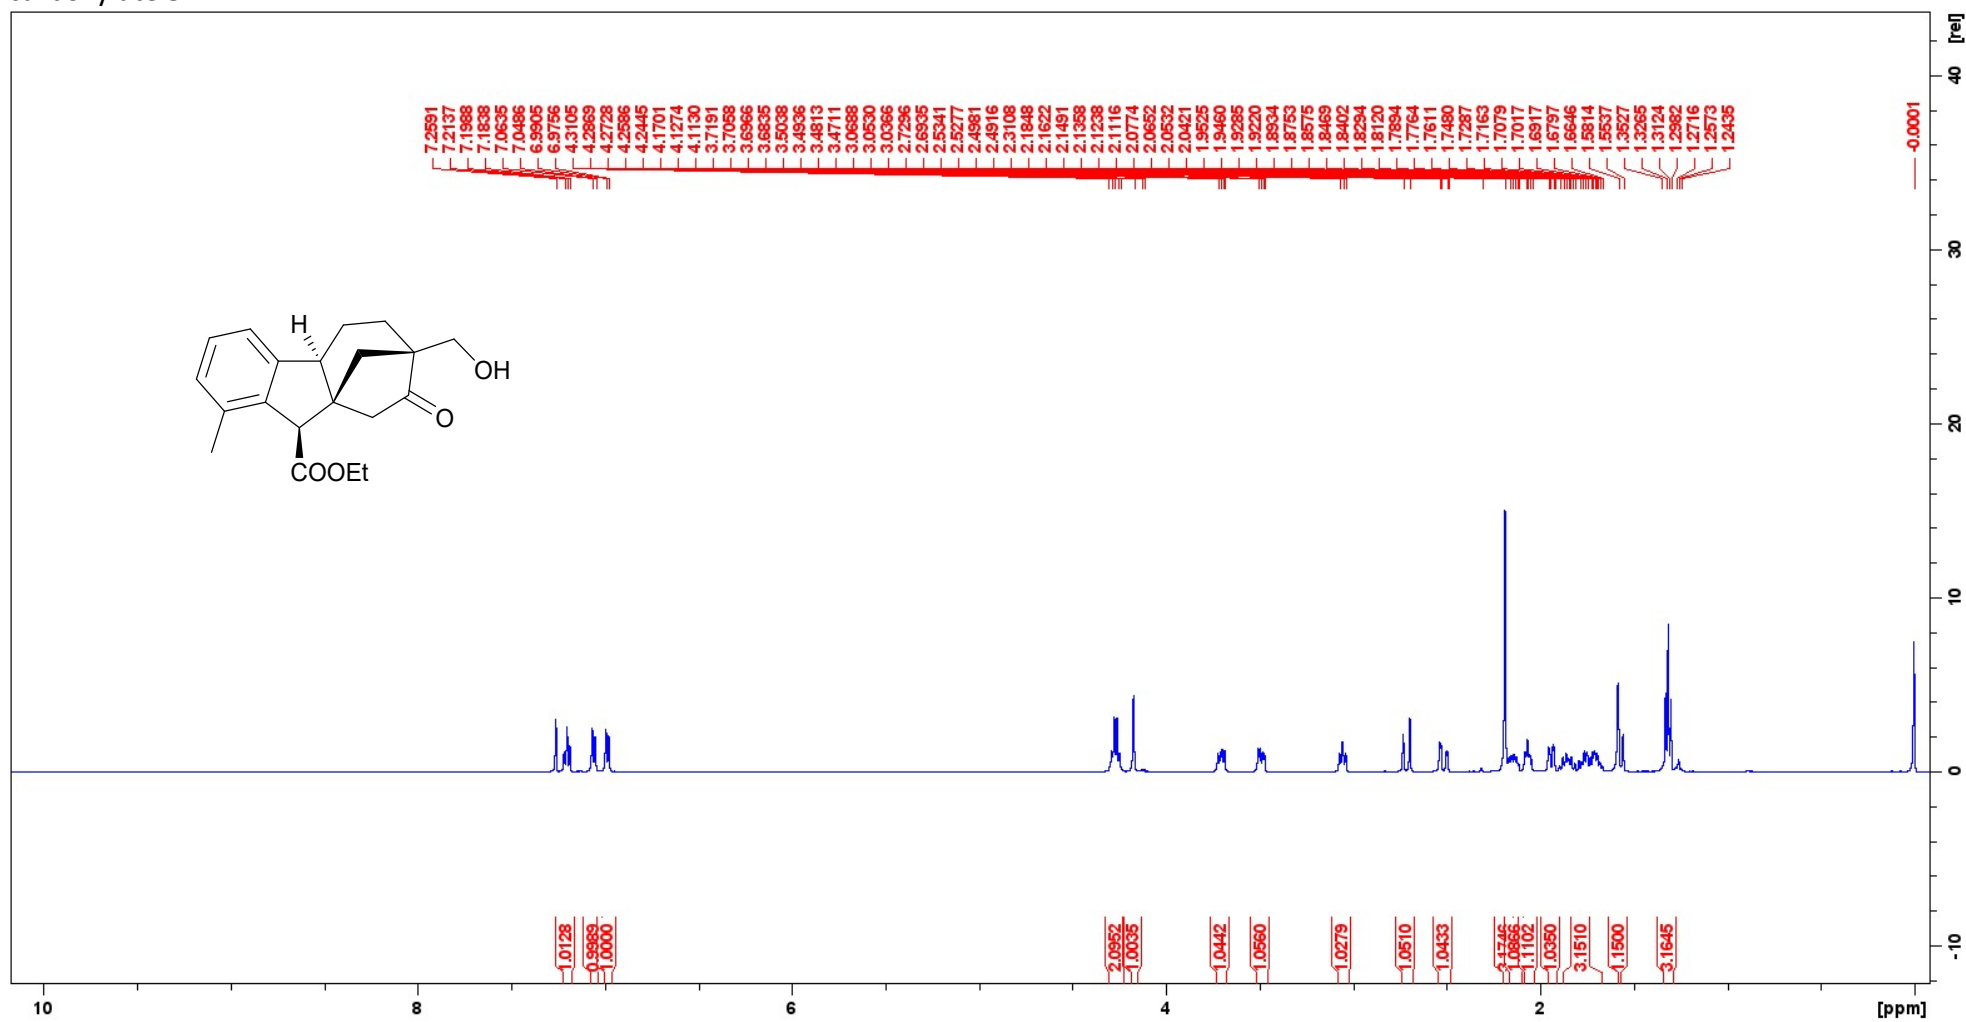

<sup>13</sup>C-NMR of ethyl (4*bS*,7*S*,9*aS*,10*R*)-7-(hydroxymethyl)-1-methyl-8-oxo-4*b*,6,7,8,9,10-hexahydro-5*H*-7,9*a*-methanobenzo[*a*]azulene-10-carboxylate **5**

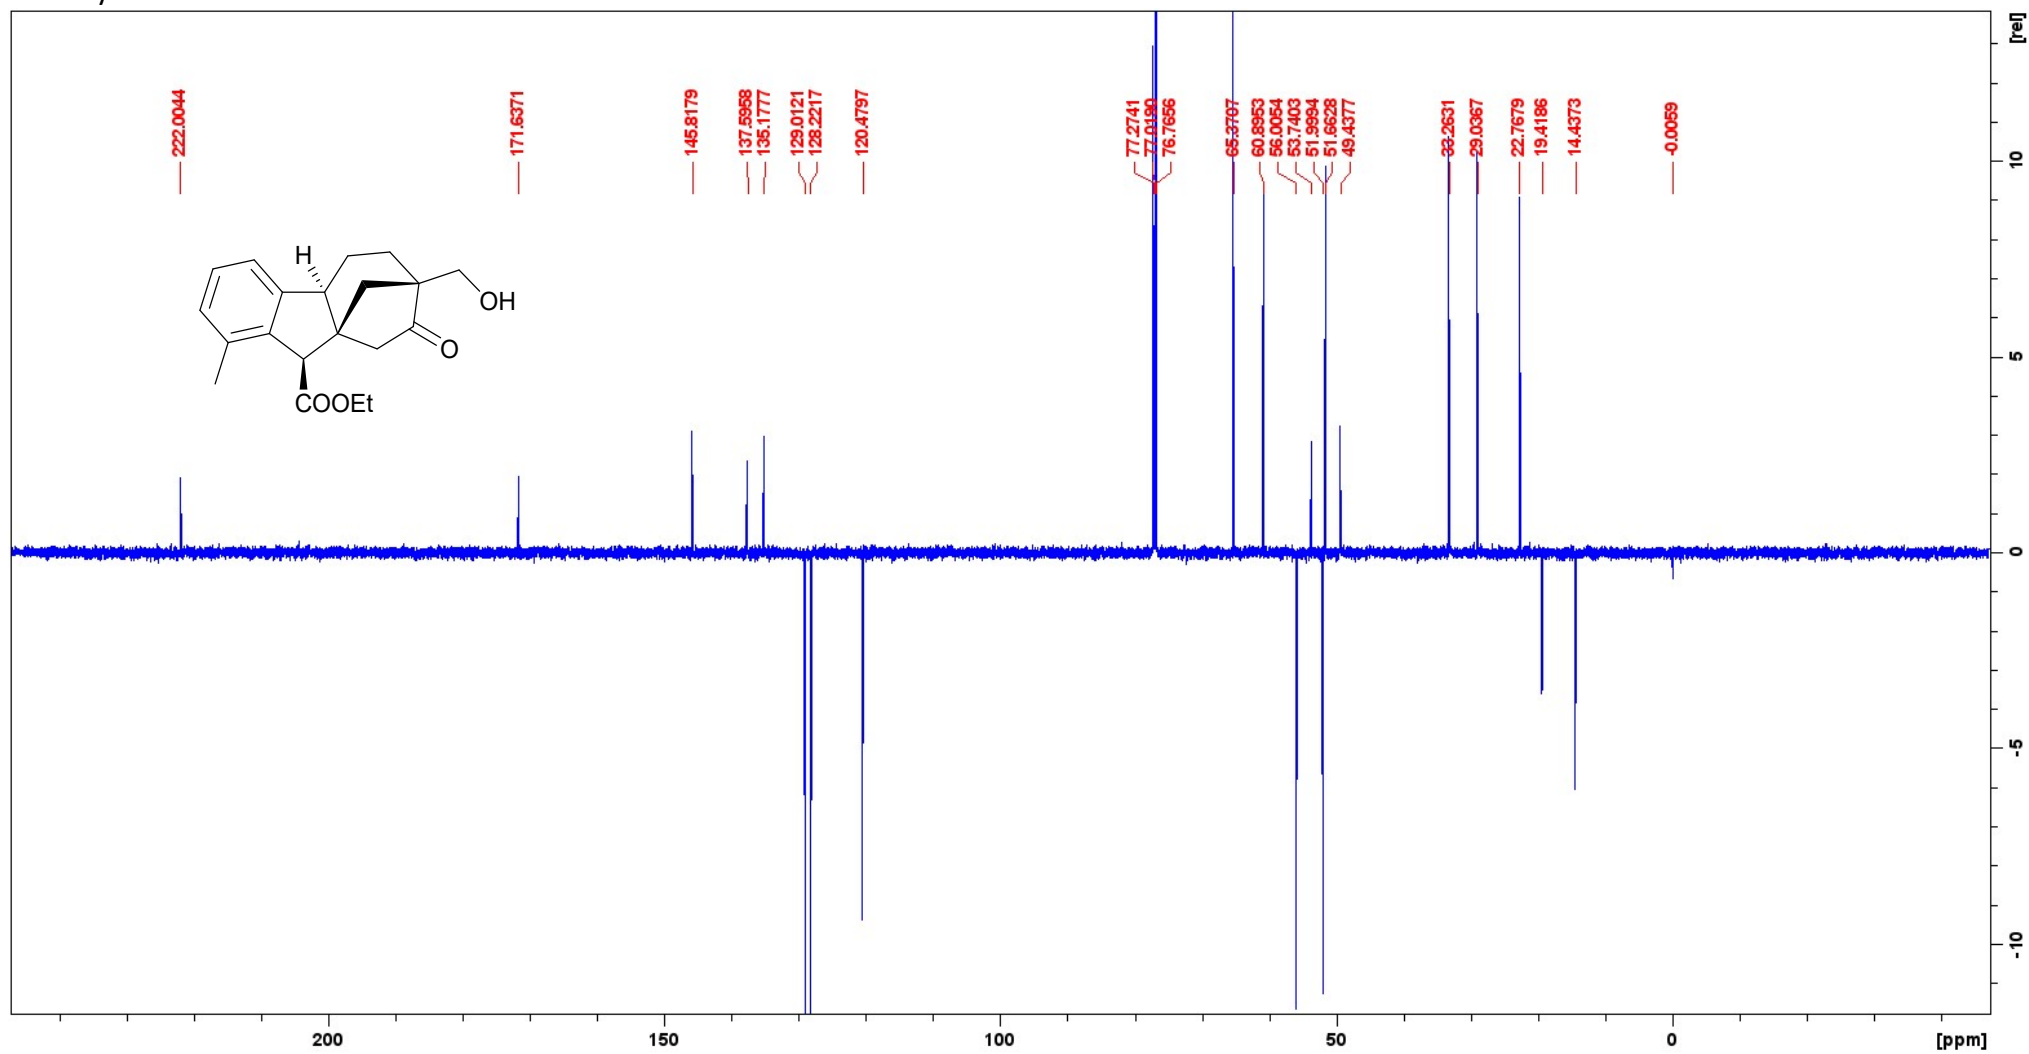

COSY of ethyl (4*S*,7*S*,9*aS*,10*R*)-7-(hydroxymethyl)-1-methyl-8-oxo-4*b*,6,7,8,9,10-hexahydro-5*H*-7,9*a*-methanobenzo[*a*]azulene-10-carboxylate **5**

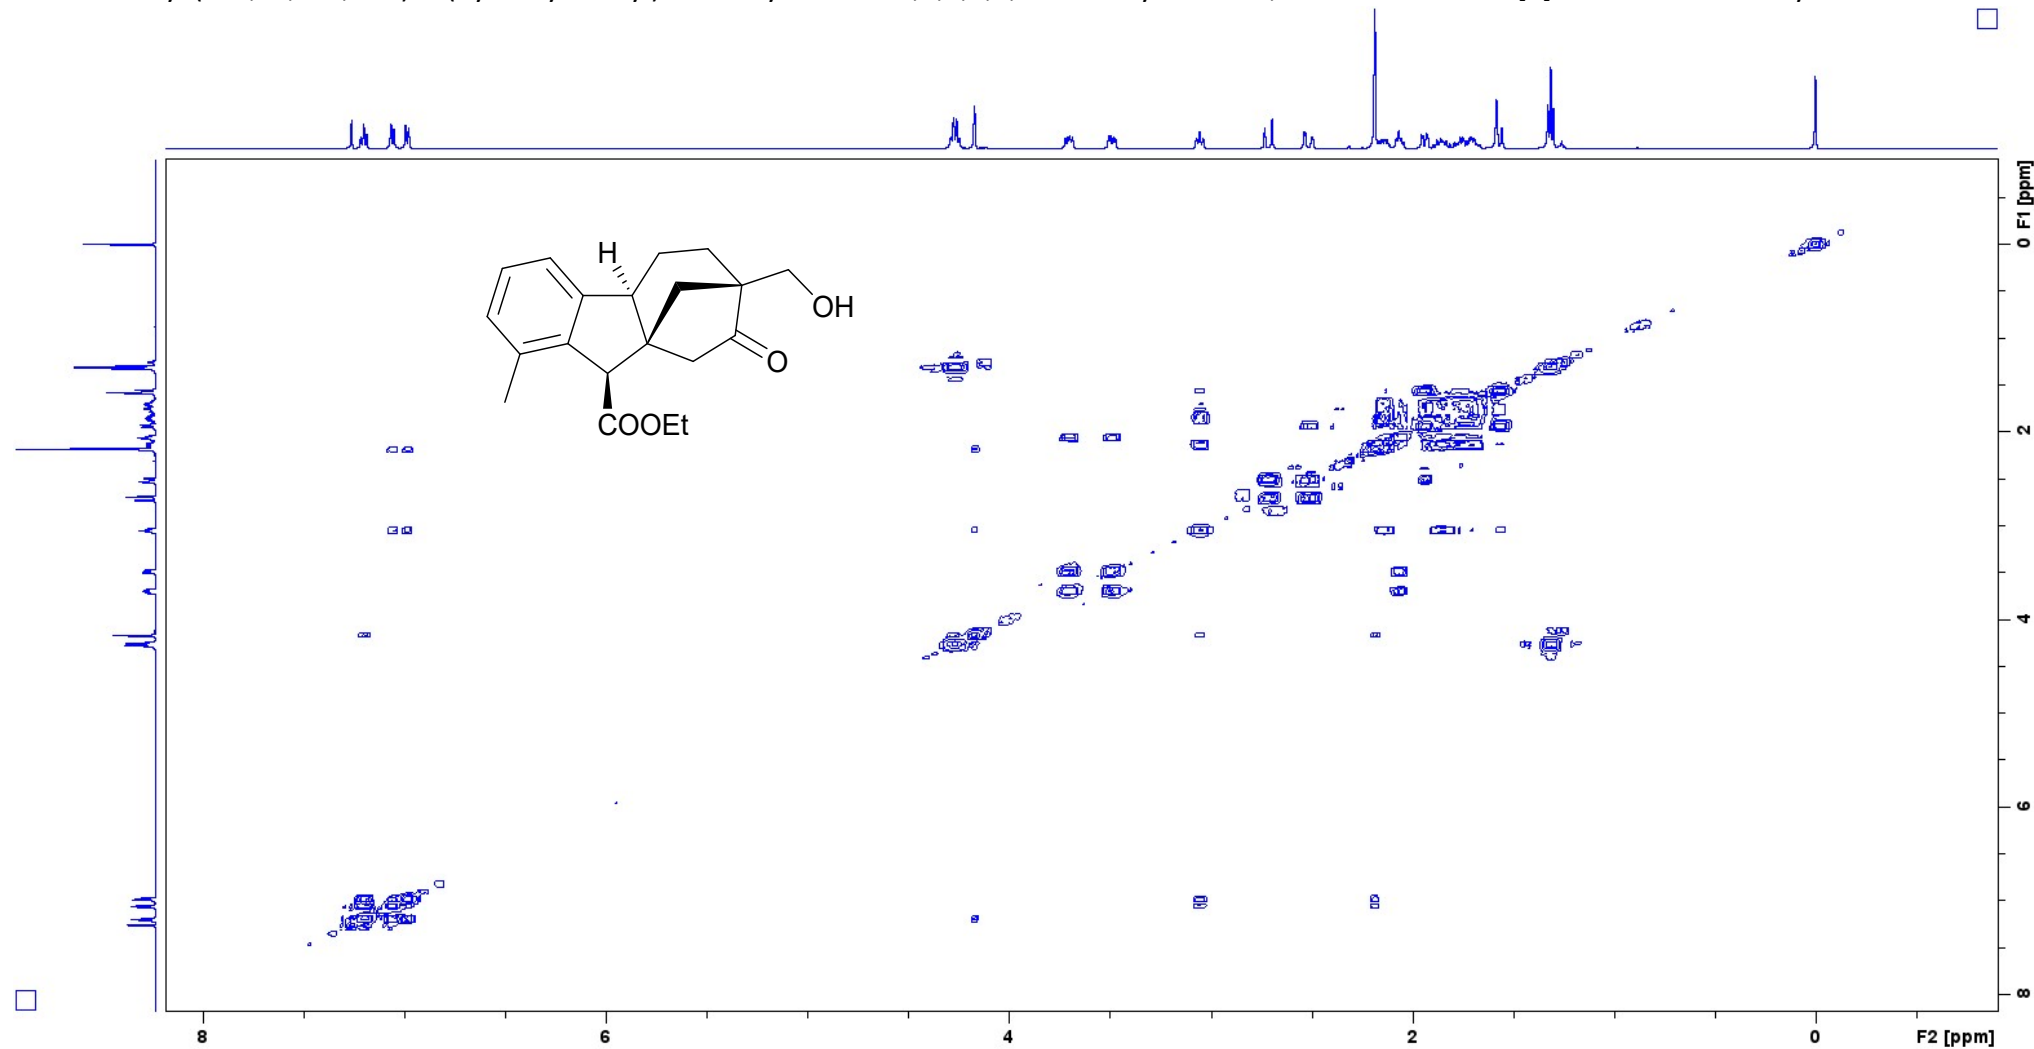

NOESY of ethyl (4*S*,7*S*,9*aS*,10*R*)-7-(hydroxymethyl)-1-methyl-8-oxo-4*b*,6,7,8,9,10-hexahydro-5*H*-7,9*a*-methanobenzo[*a*]azulene-10-carboxylate

5

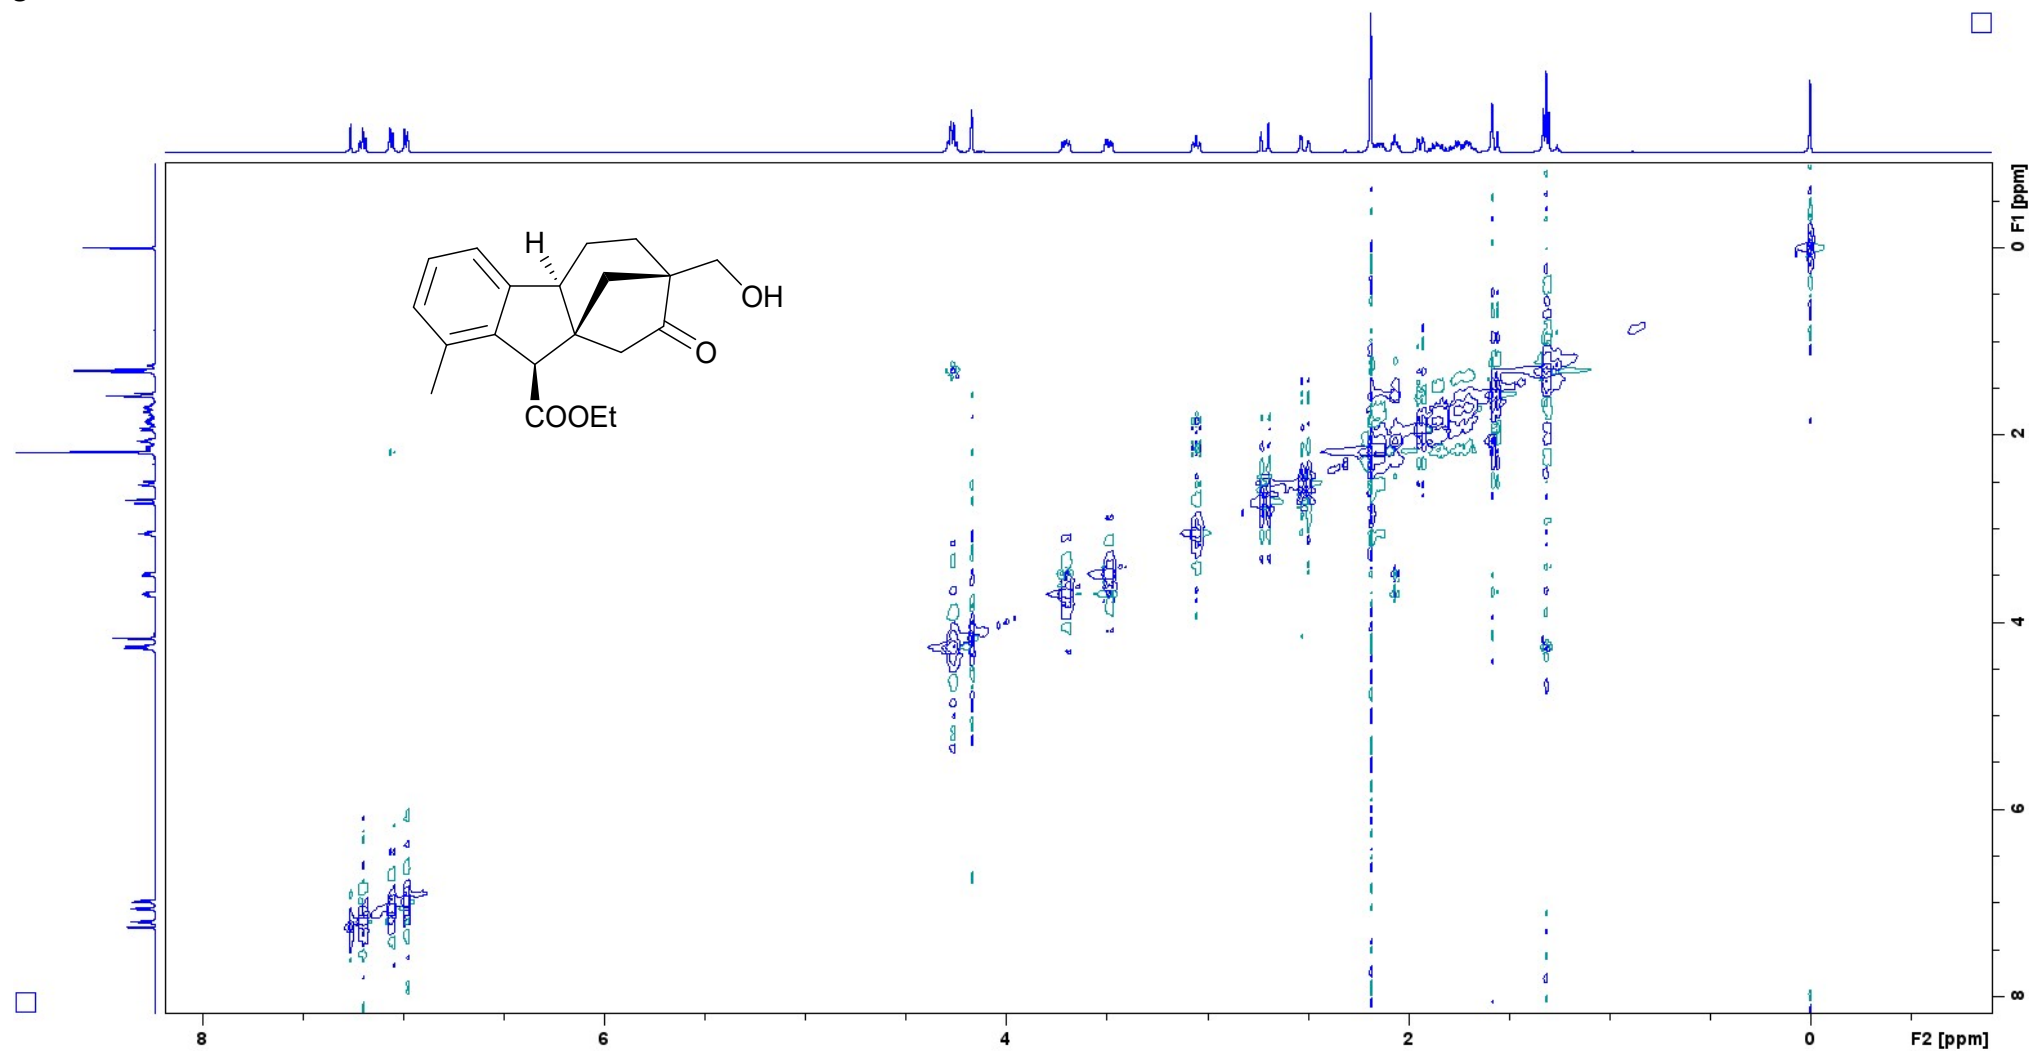



HSQC of ethyl (4*b**S*,7*S*,9*a**S*,10*R*)-7-(hydroxymethyl)-1-methyl-8-oxo-4*b*,6,7,8,9,10-hexahydro-5*H*-7,9*a*-methanobenzo[*a*]azulene-10-carboxylate  
5

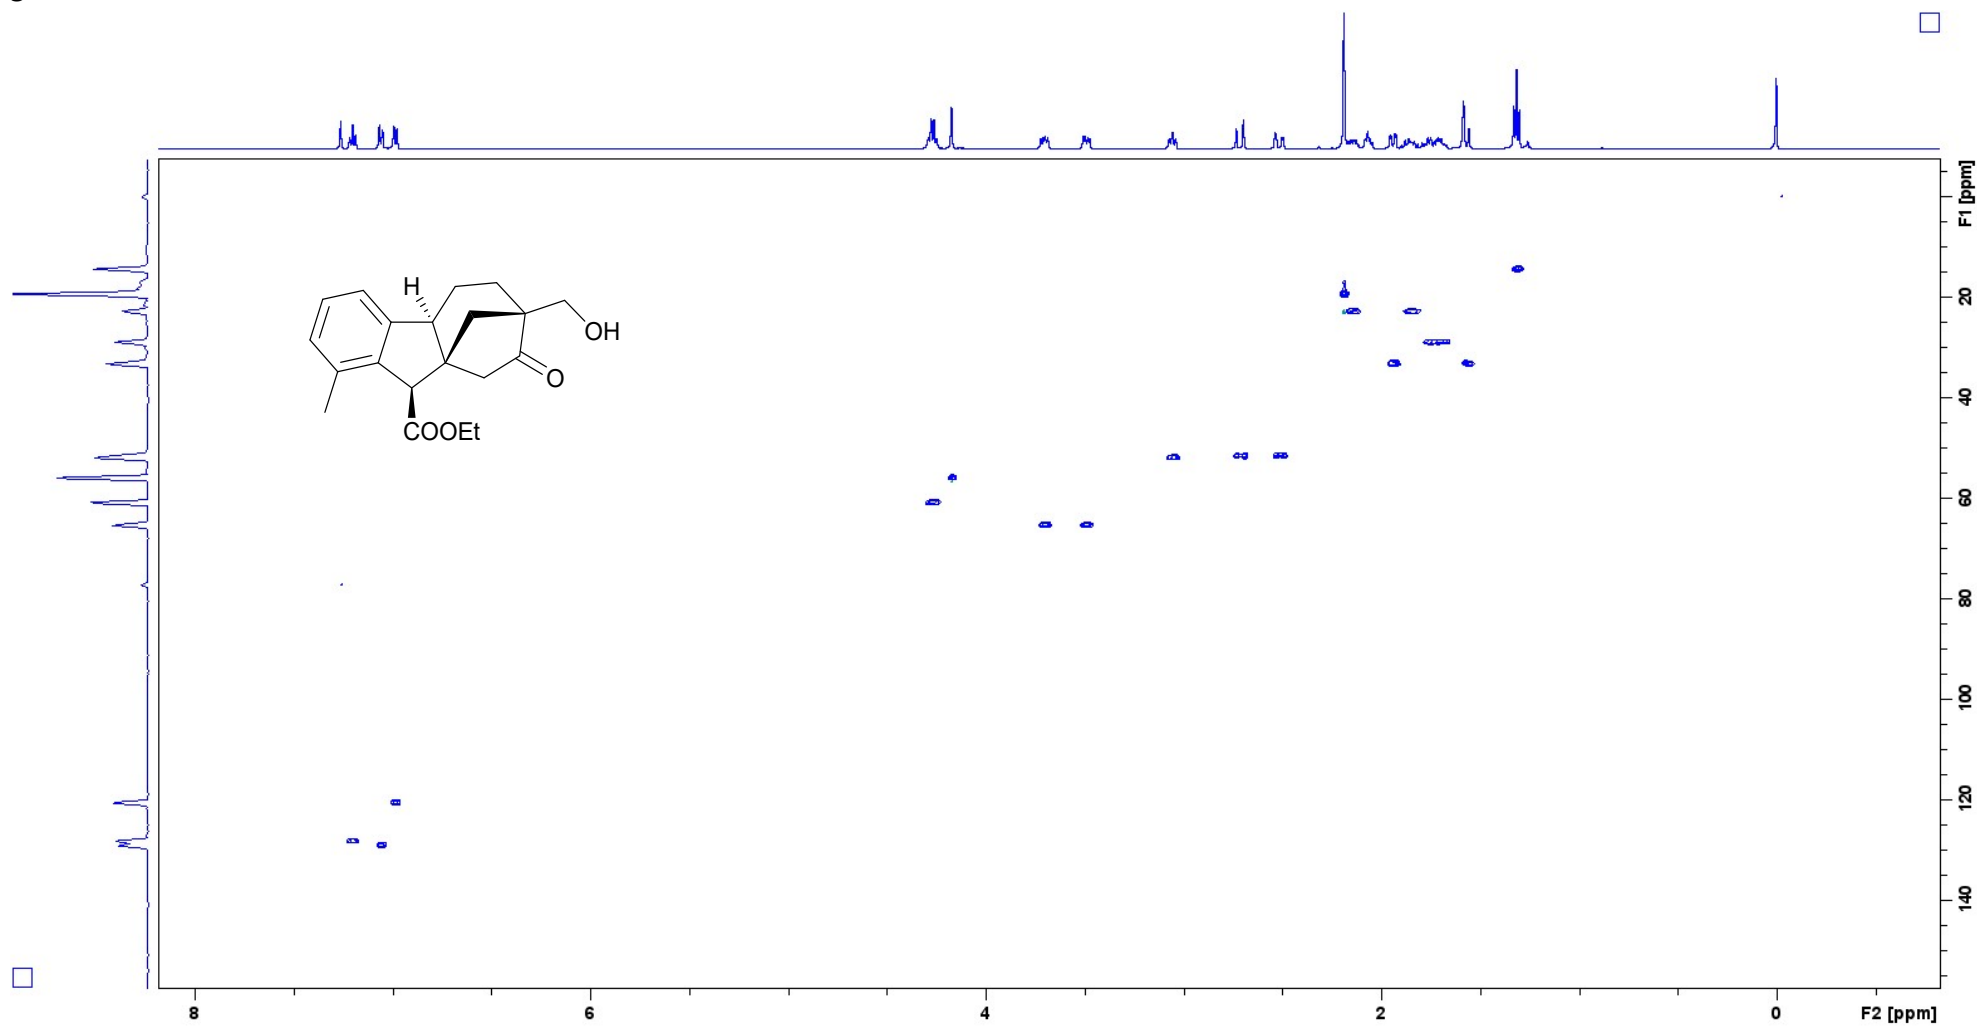

HMBC of ethyl (4*b**S*,7*S*,9*a**S*,10*R*)-7-(hydroxymethyl)-1-methyl-8-oxo-4*b*,6,7,8,9,10-hexahydro-5*H*-7,9*a*-methanobenzo[*a*]azulene-10-carboxylate  
5

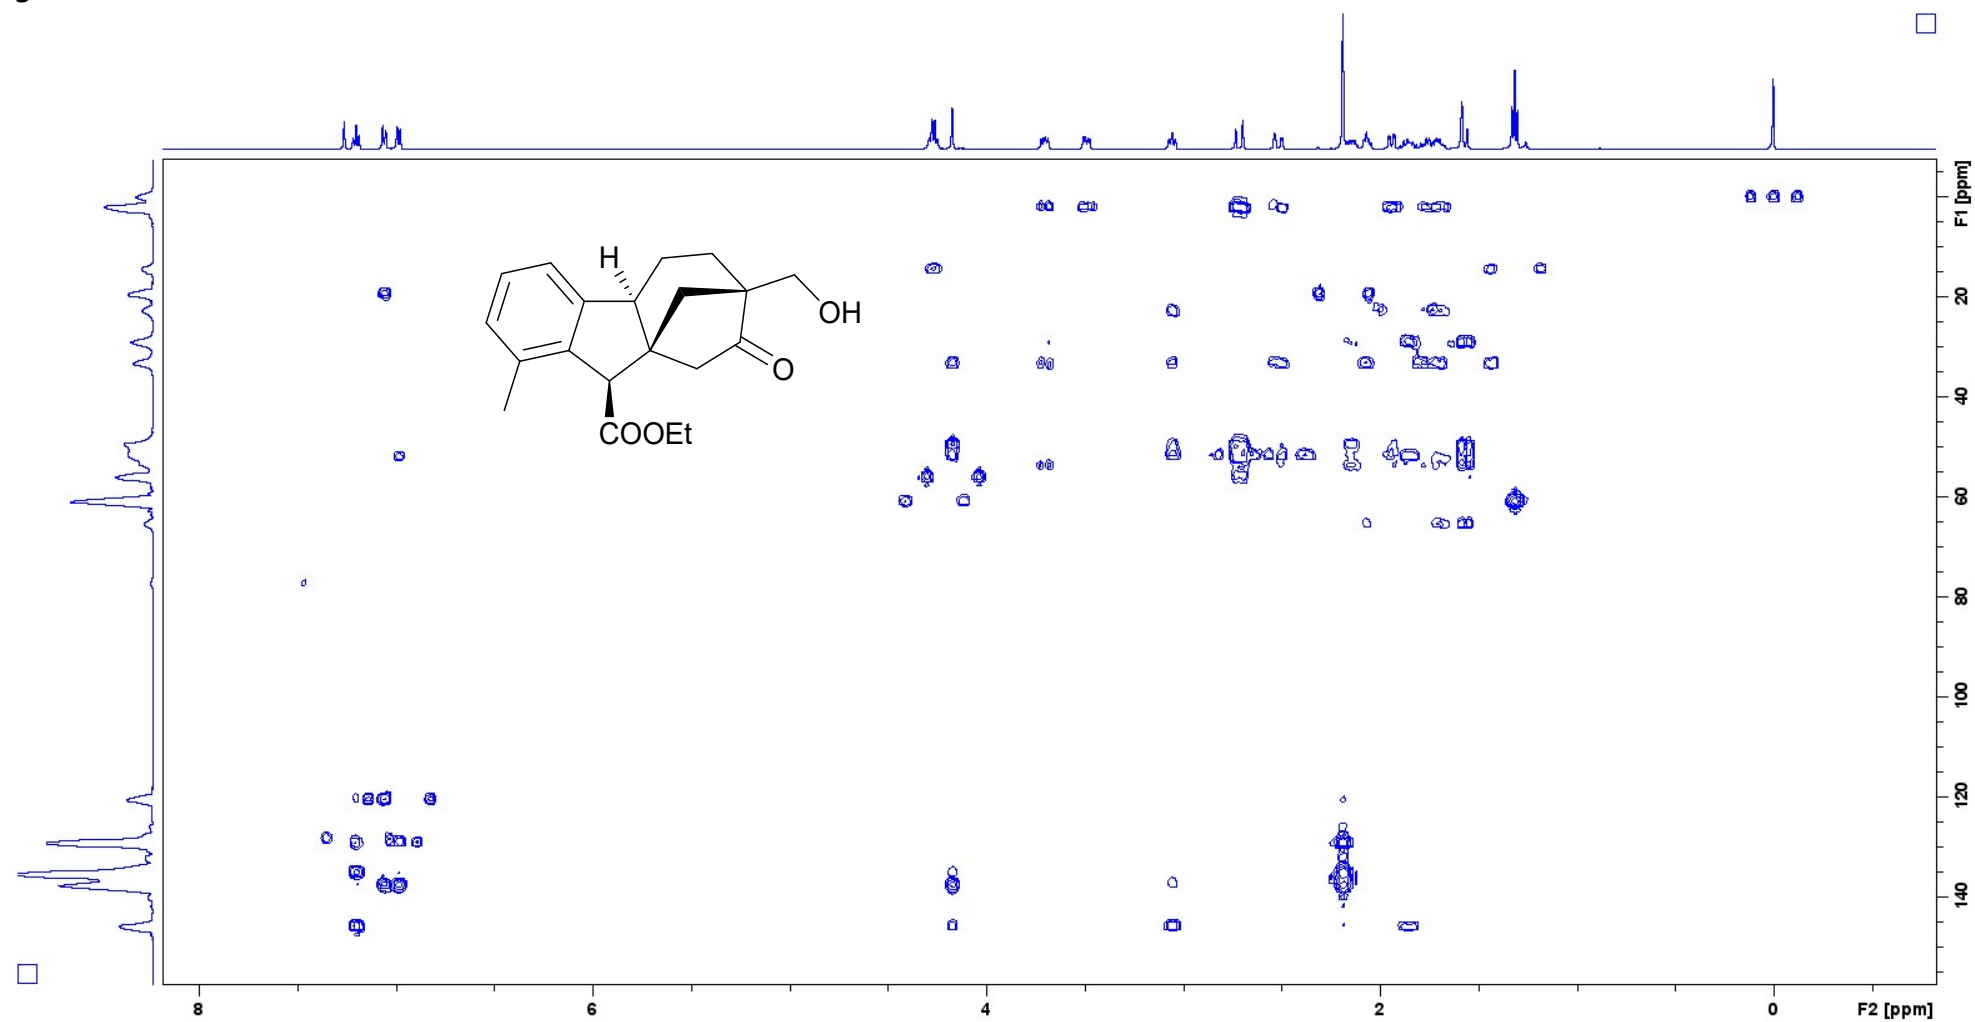

<sup>1</sup>H-NMR of ethyl (4bS,7R,9aS,10R,E)-8-(hydroxyimino)-7-(hydroxymethyl)-1-methyl-4b,6,7,8,9,10-hexahydro-5H-7,9a-methanobenzo[*a*]azulene-10-carboxylate **6**

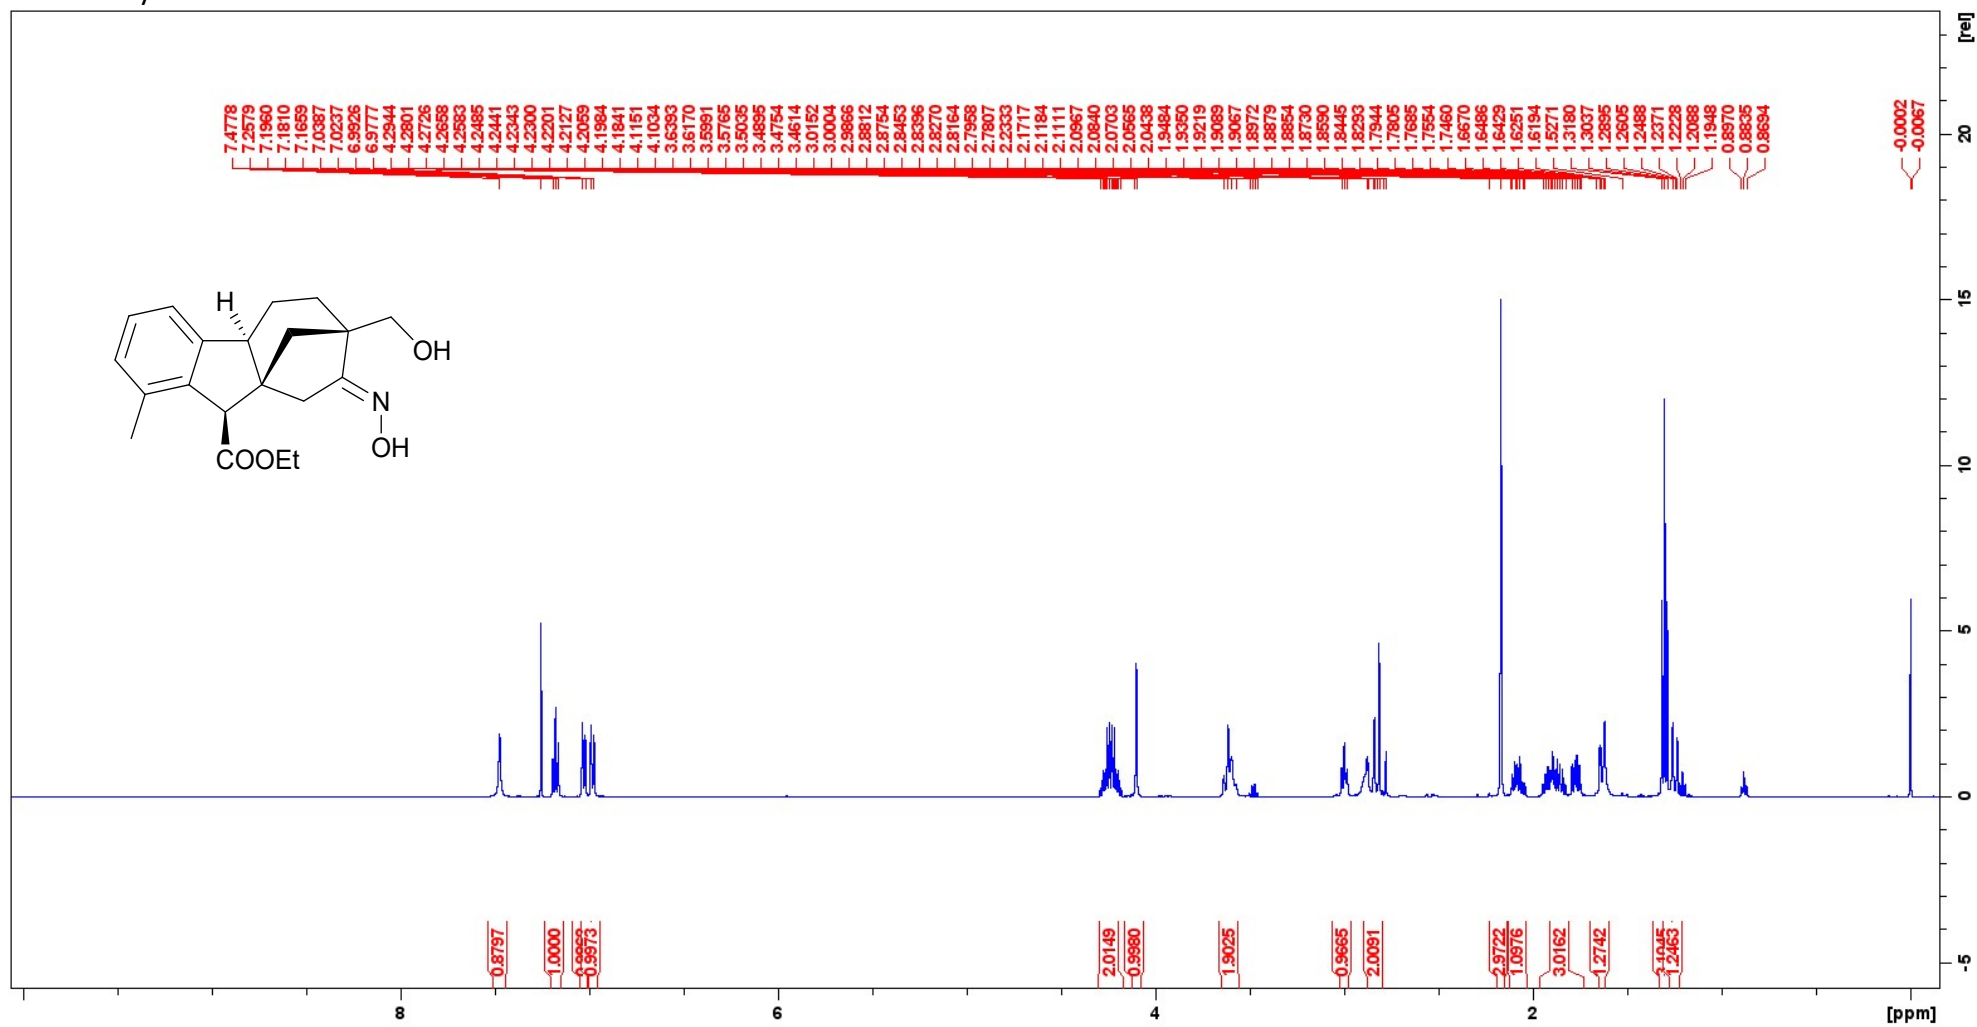

<sup>13</sup>C-NMR of ethyl (4*bS*,7*R*,9*aS*,10*R*,*E*)-8-(hydroxyimino)-7-(hydroxymethyl)-1-methyl-4*b*,6,7,8,9,10-hexahydro-5*H*-7,9*a*-methanobenzo[*a*]azulene-10-carboxylate **6**

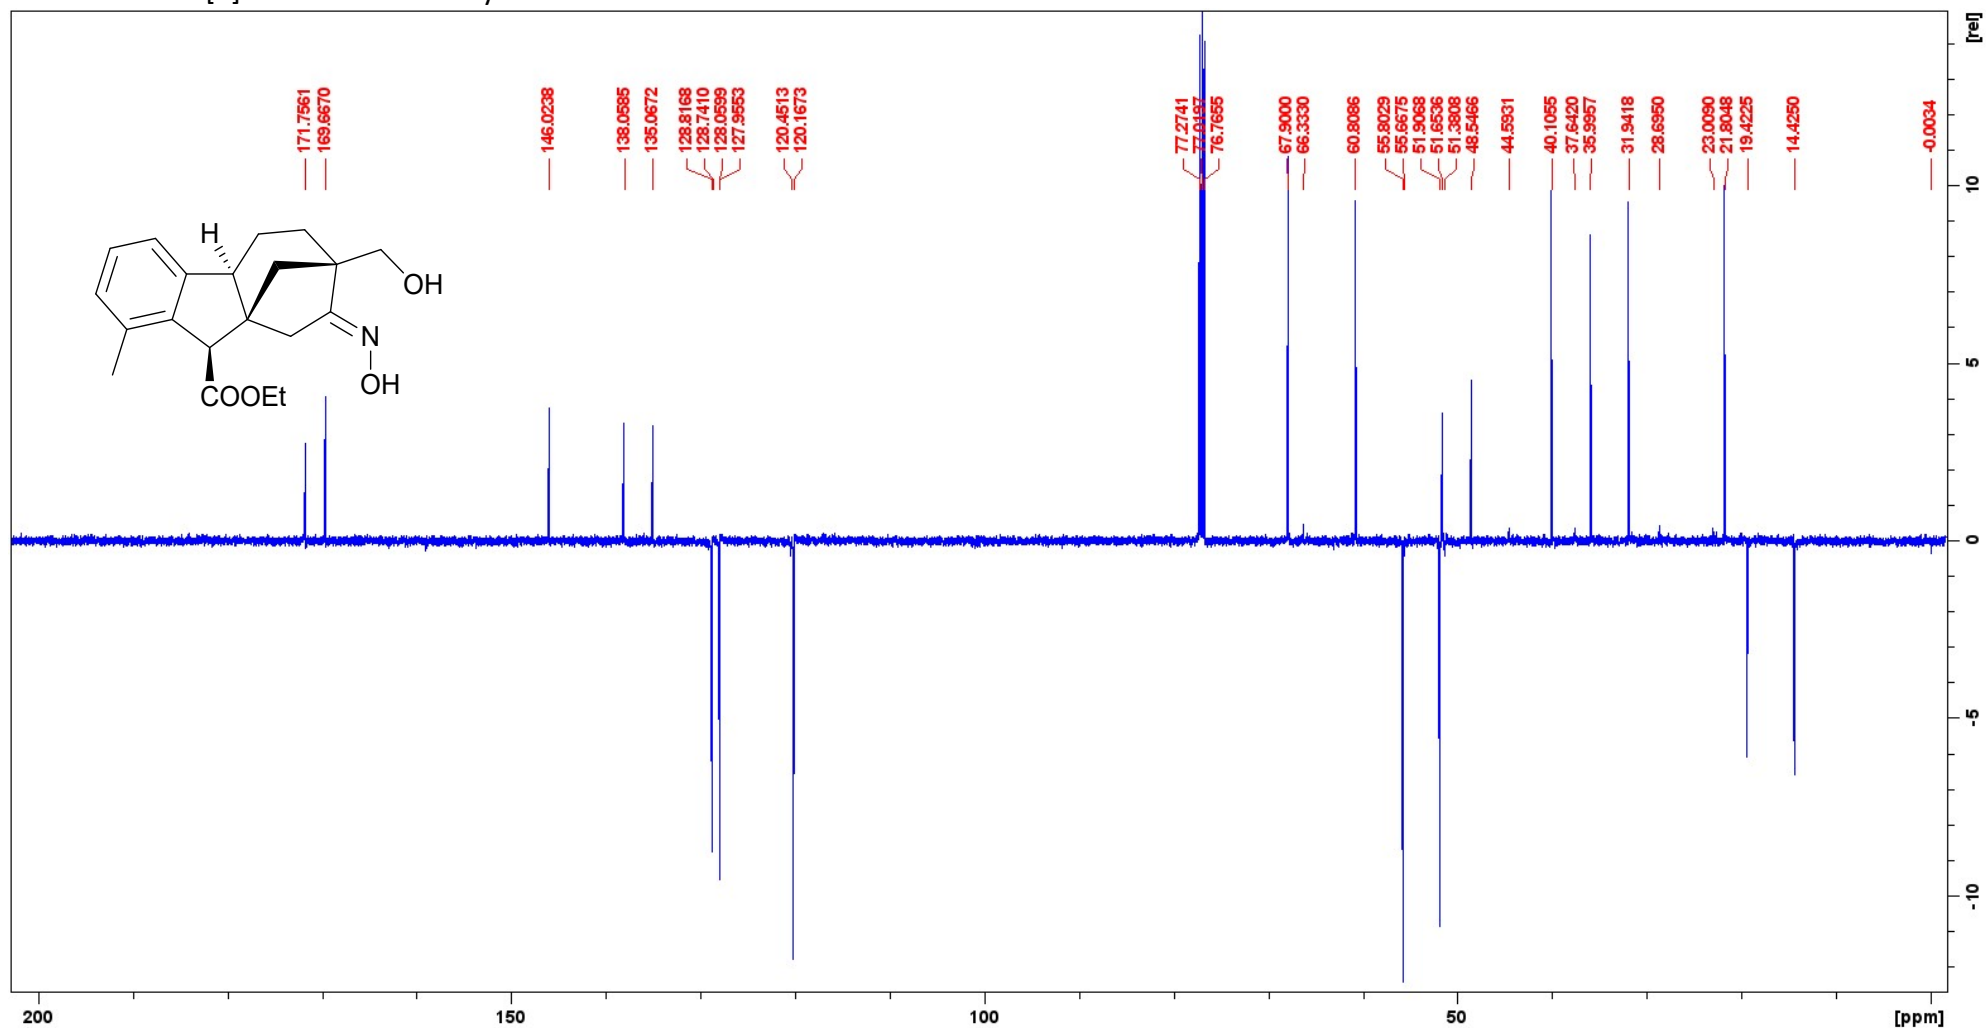

COSY of ethyl (4*bS*,7*R*,9*aS*,10*R*,*E*)-8-(hydroxyimino)-7-(hydroxymethyl)-1-methyl-4*b*,6,7,8,9,10-hexahydro-5*H*-7,9*a*-methanobenzo[*a*]azulene-10-carboxylate **6**

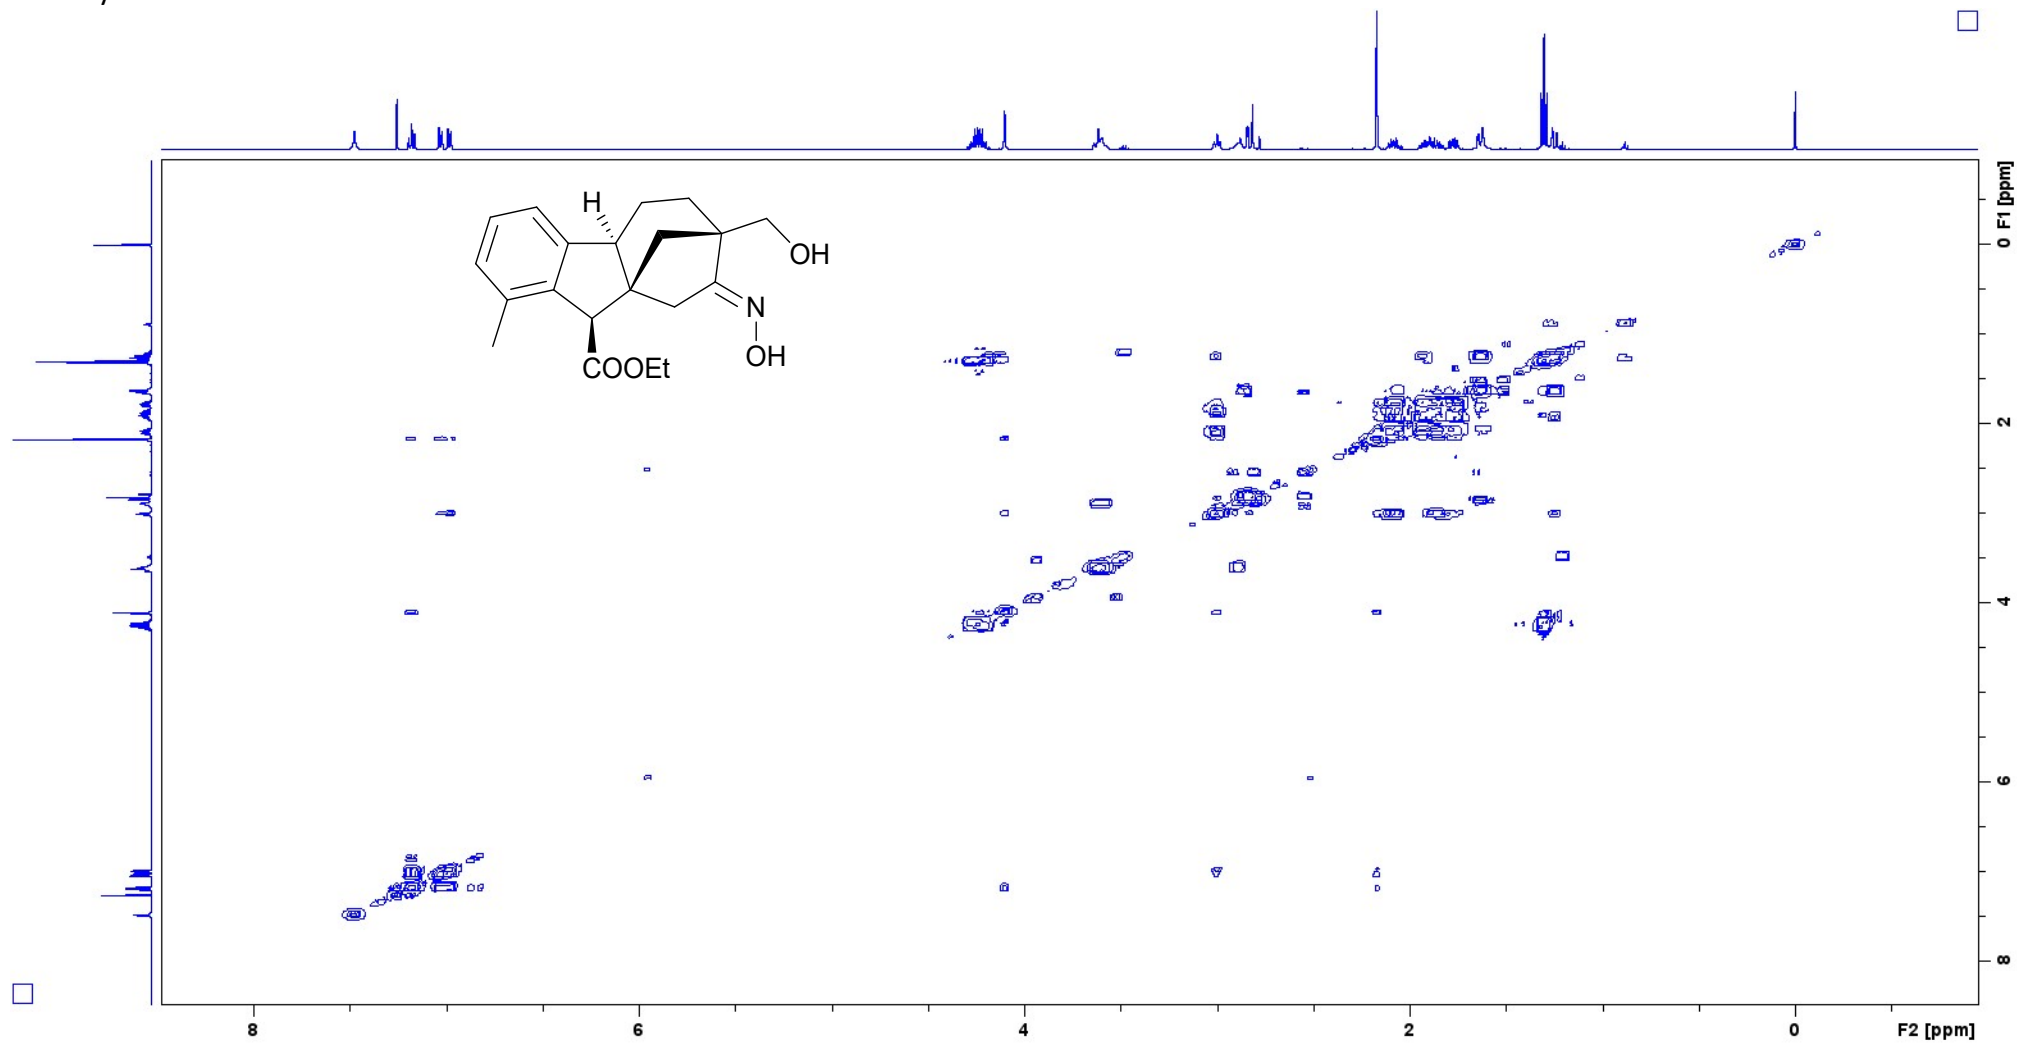

NOESY of ethyl (4*b**S*,7*R*,9*a**S*,10*R*,*E*)-8-(hydroxyimino)-7-(hydroxymethyl)-1-methyl-4*b*,6,7,8,9,10-hexahydro-5*H*-7,9*a*-methanobenzo[*a*]azulene-10-carboxylate **6**

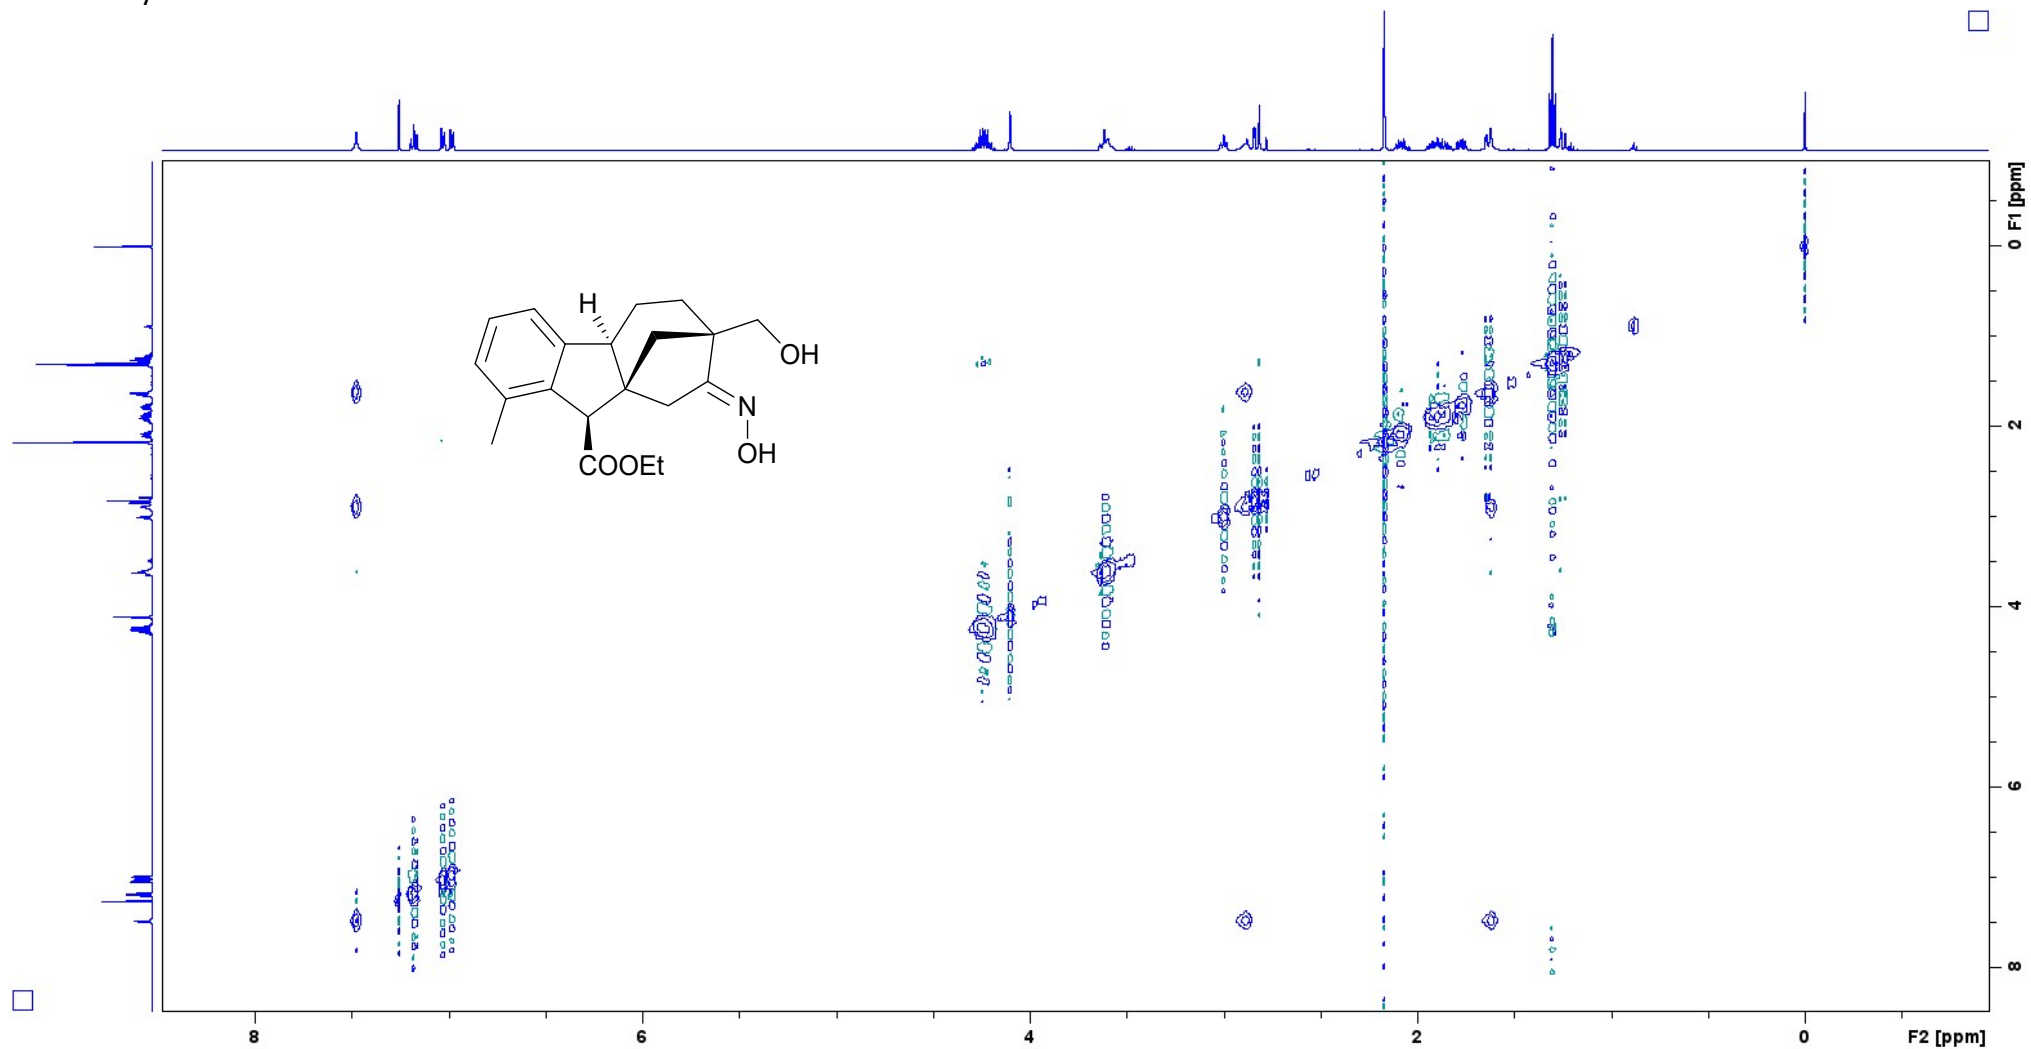

HSQC of ethyl (4*S*,7*R*,9*aS*,10*R*,*E*)-8-(hydroxyimino)-7-(hydroxymethyl)-1-methyl-4*b*,6,7,8,9,10-hexahydro-5*H*-7,9*a*-methanobenzo[*a*]azulene-10-carboxylate **6**

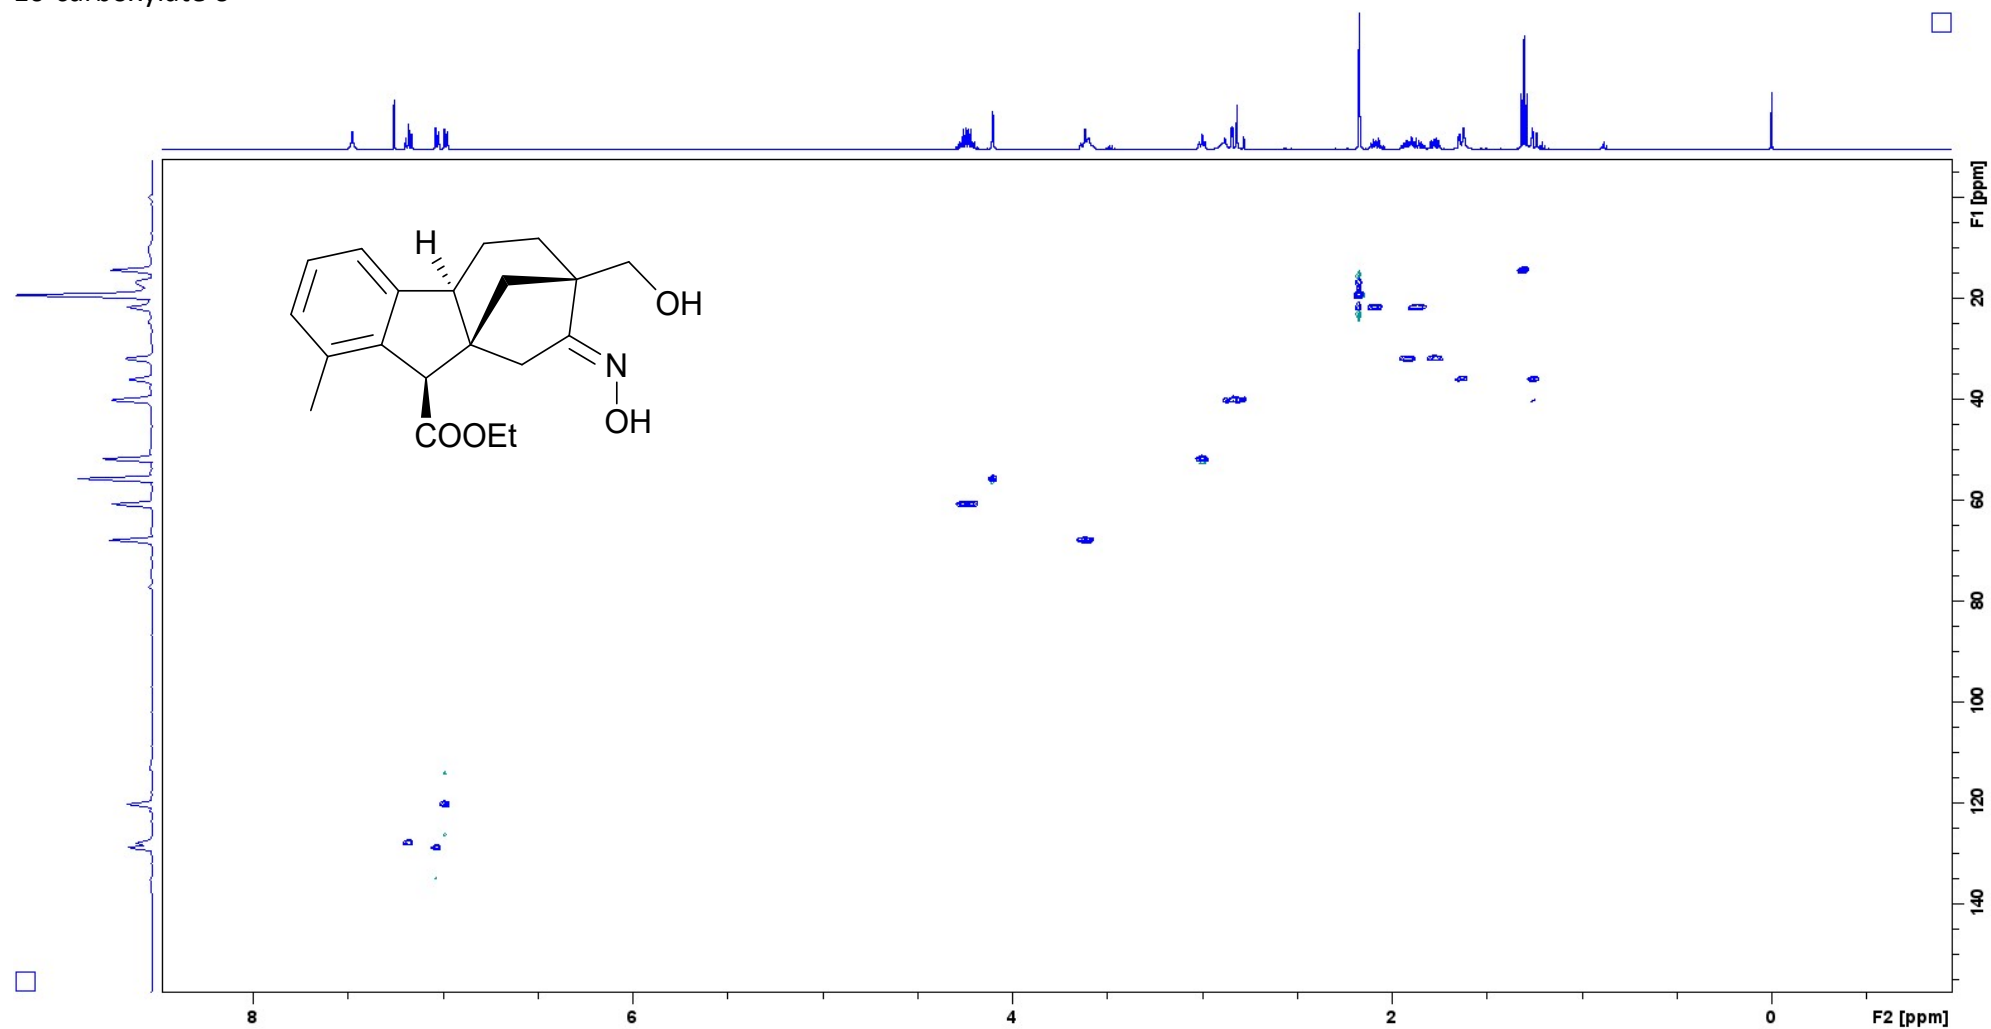

HMBC of ethyl (4*b**S*,7*R*,9*a**S*,10*R*,*E*)-8-(hydroxyimino)-7-(hydroxymethyl)-1-methyl-4*b*,6,7,8,9,10-hexahydro-5*H*-7,9*a*-methanobenzo[*a*]azulene-10-carboxylate **6**

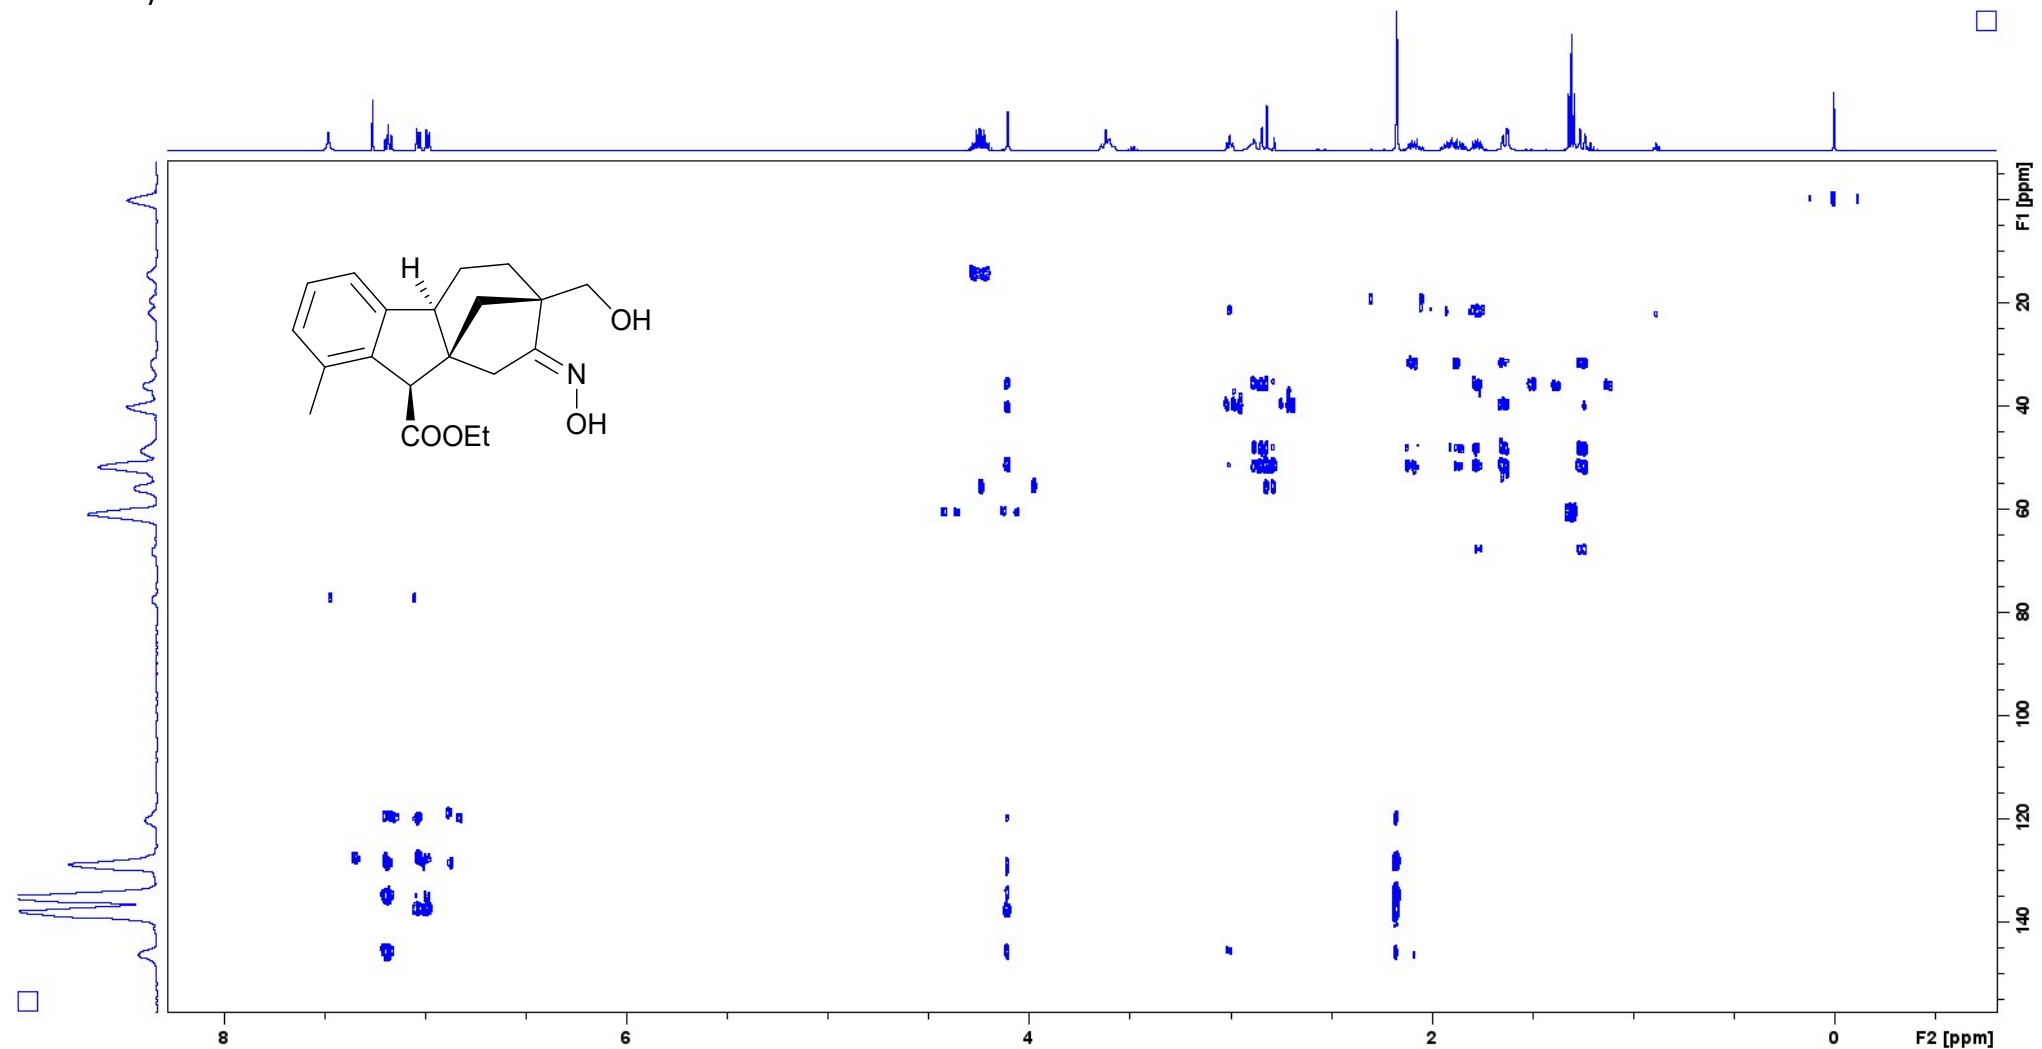



<sup>1</sup>H-NMR of ethyl (4b*S*,7*R*,8*S*,9*aS*,10*R*)-8-amino-7-(hydroxymethyl)-1-methyl-4b,6,7,8,9,10-hexahydro-5H-7,9a-methanobenzo[*a*]azulene-10-carboxylate **7**

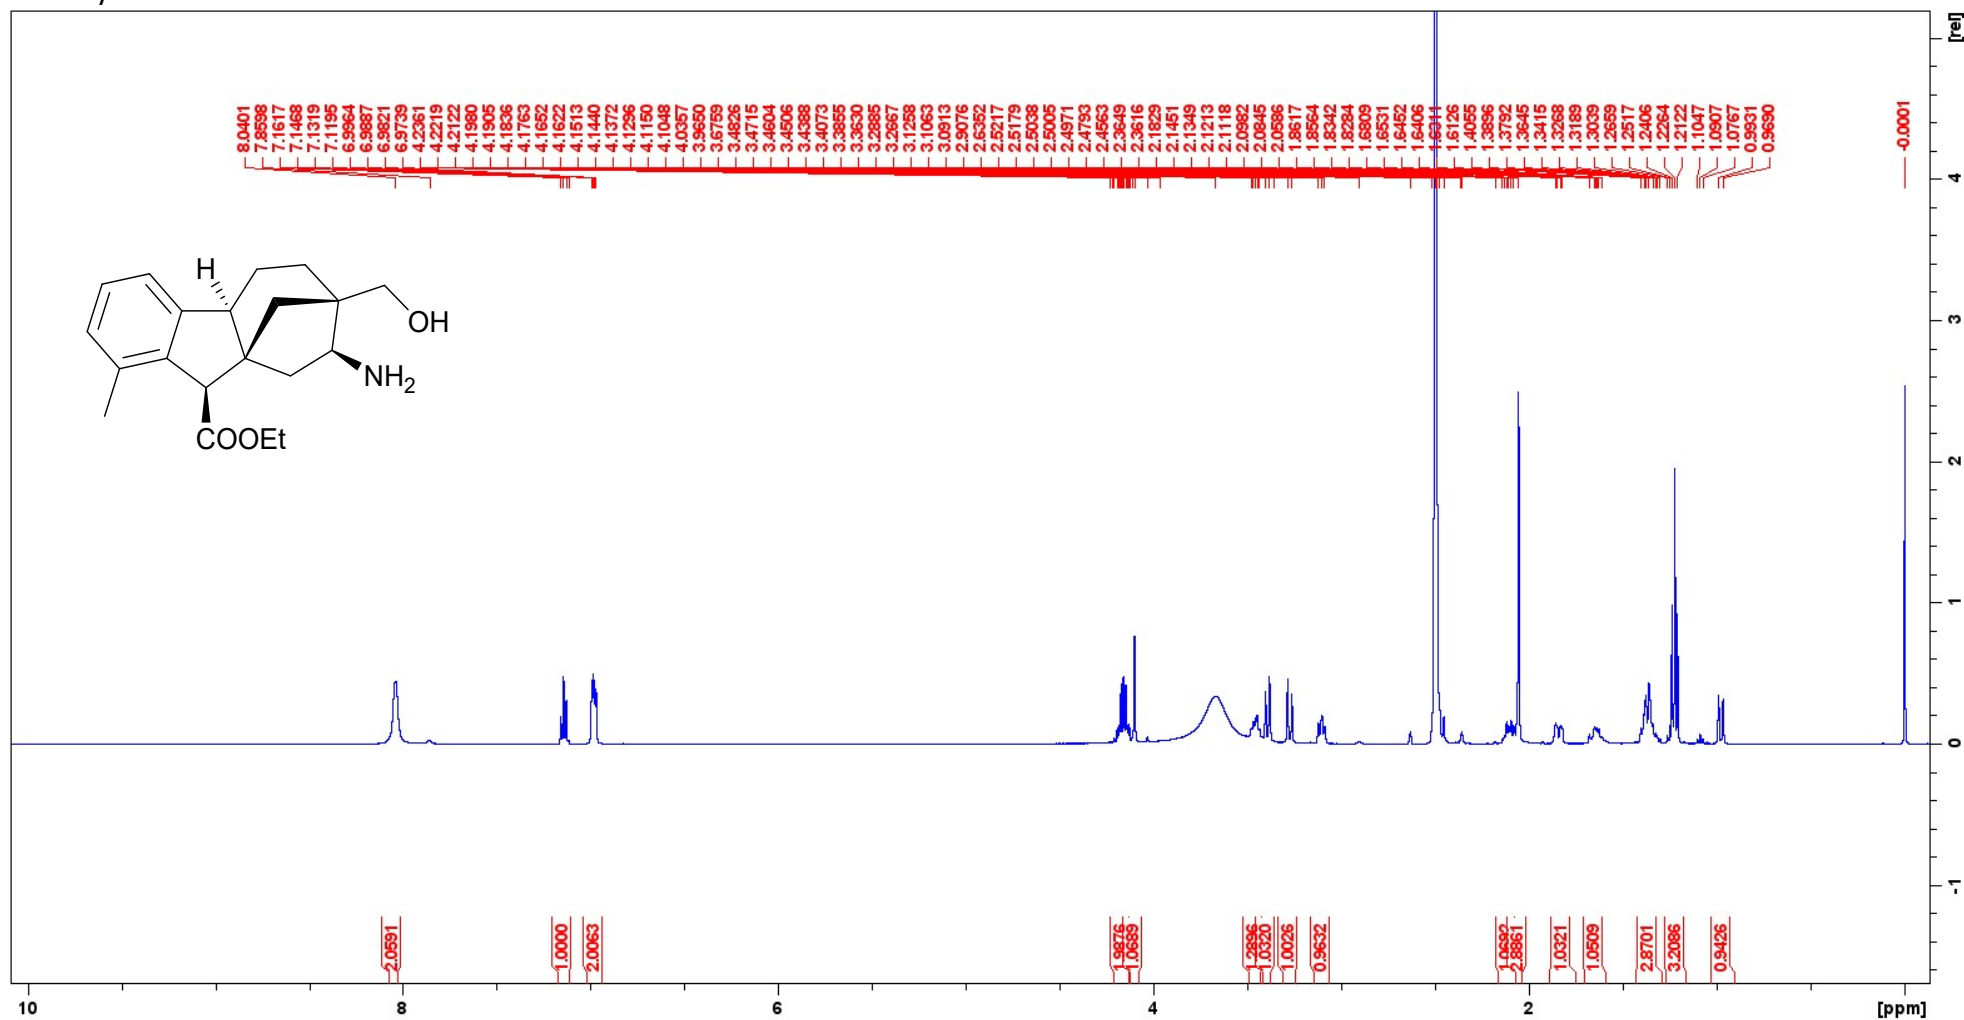

<sup>13</sup>C-NMR of ethyl (4b*S*,7*R*,8*S*,9*aS*,10*R*)-8-amino-7-(hydroxymethyl)-1-methyl-4b,6,7,8,9,10-hexahydro-5*H*-7,9*a*-methanobenzo[*a*]azulene-10-carboxylate **7**

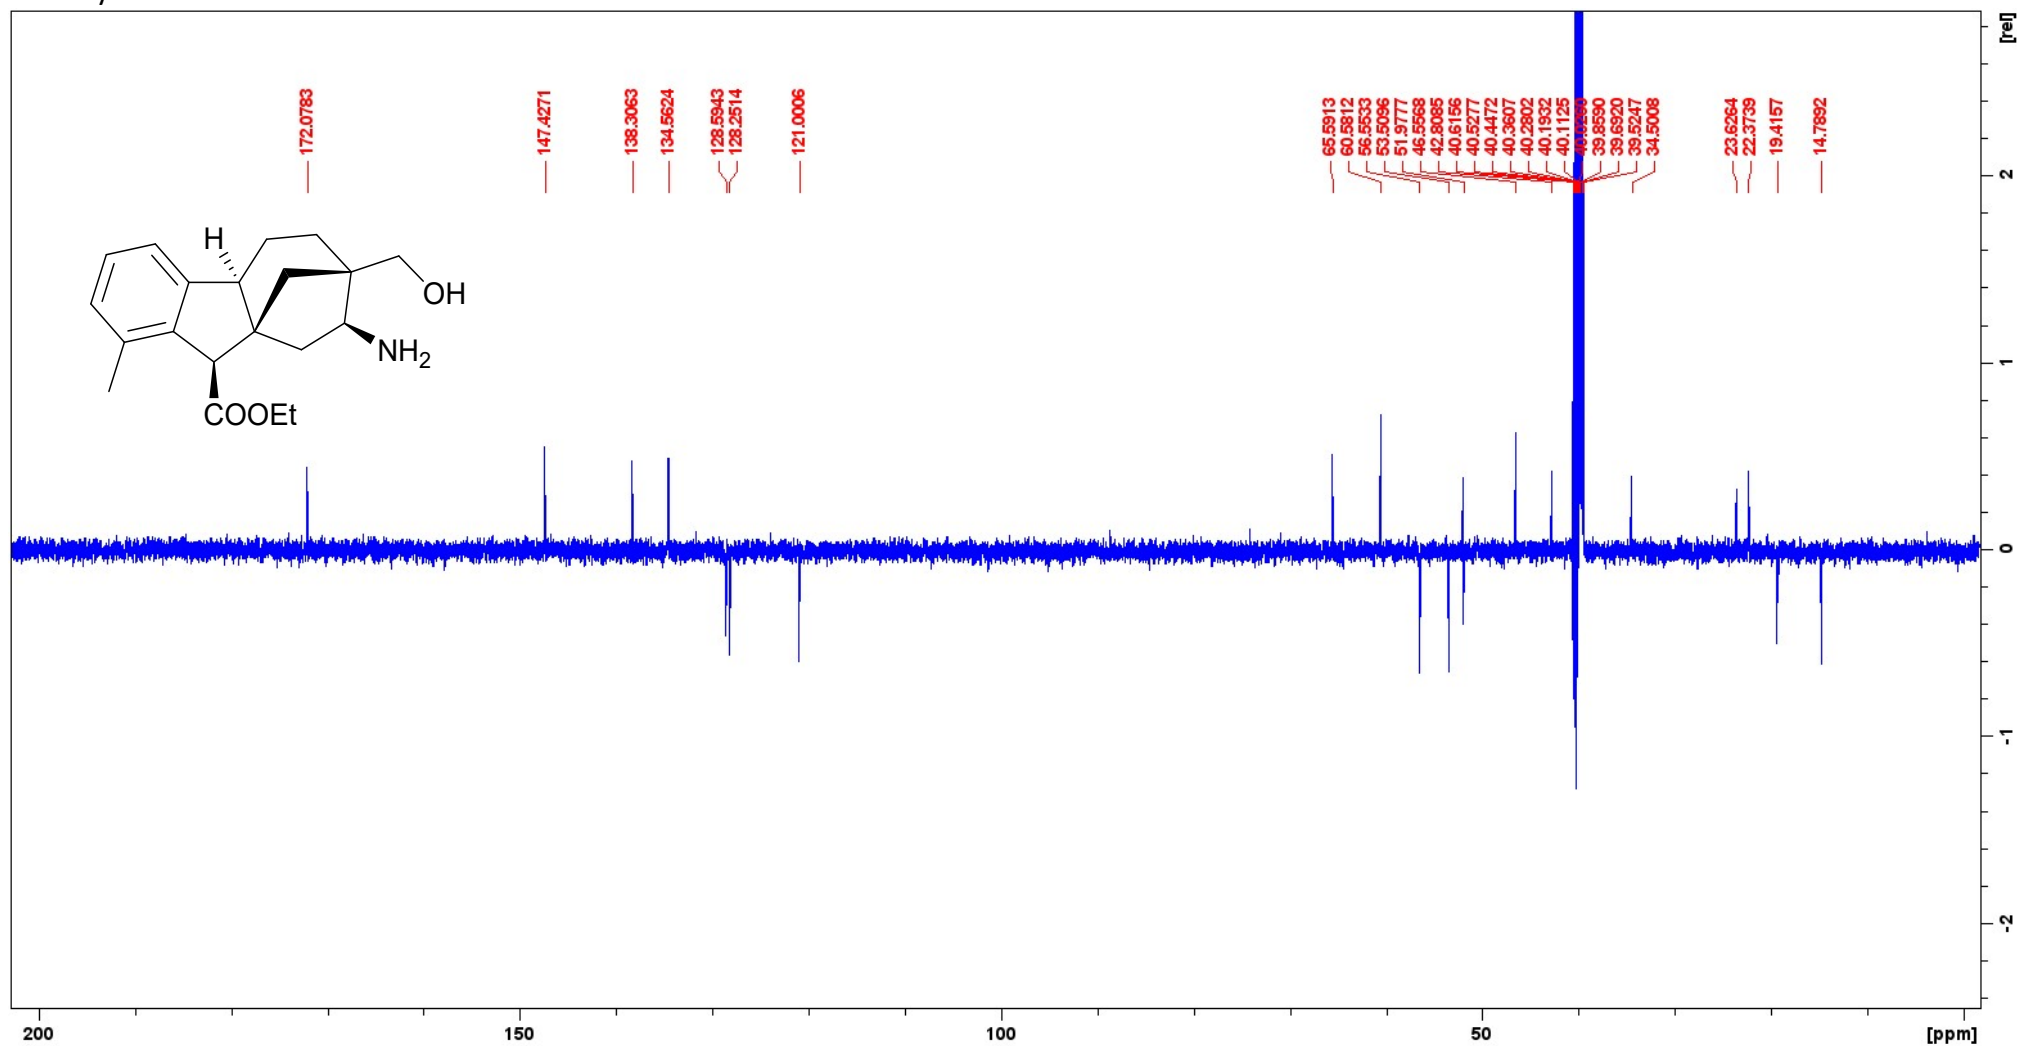

COSY of ethyl (4*bS*,7*R*,8*S*,9*aS*,10*R*)-8-amino-7-(hydroxymethyl)-1-methyl-4*b*,6,7,8,9,10-hexahydro-5*H*-7,9*a*-methanobenzo[*a*]azulene-10-carboxylate **7**

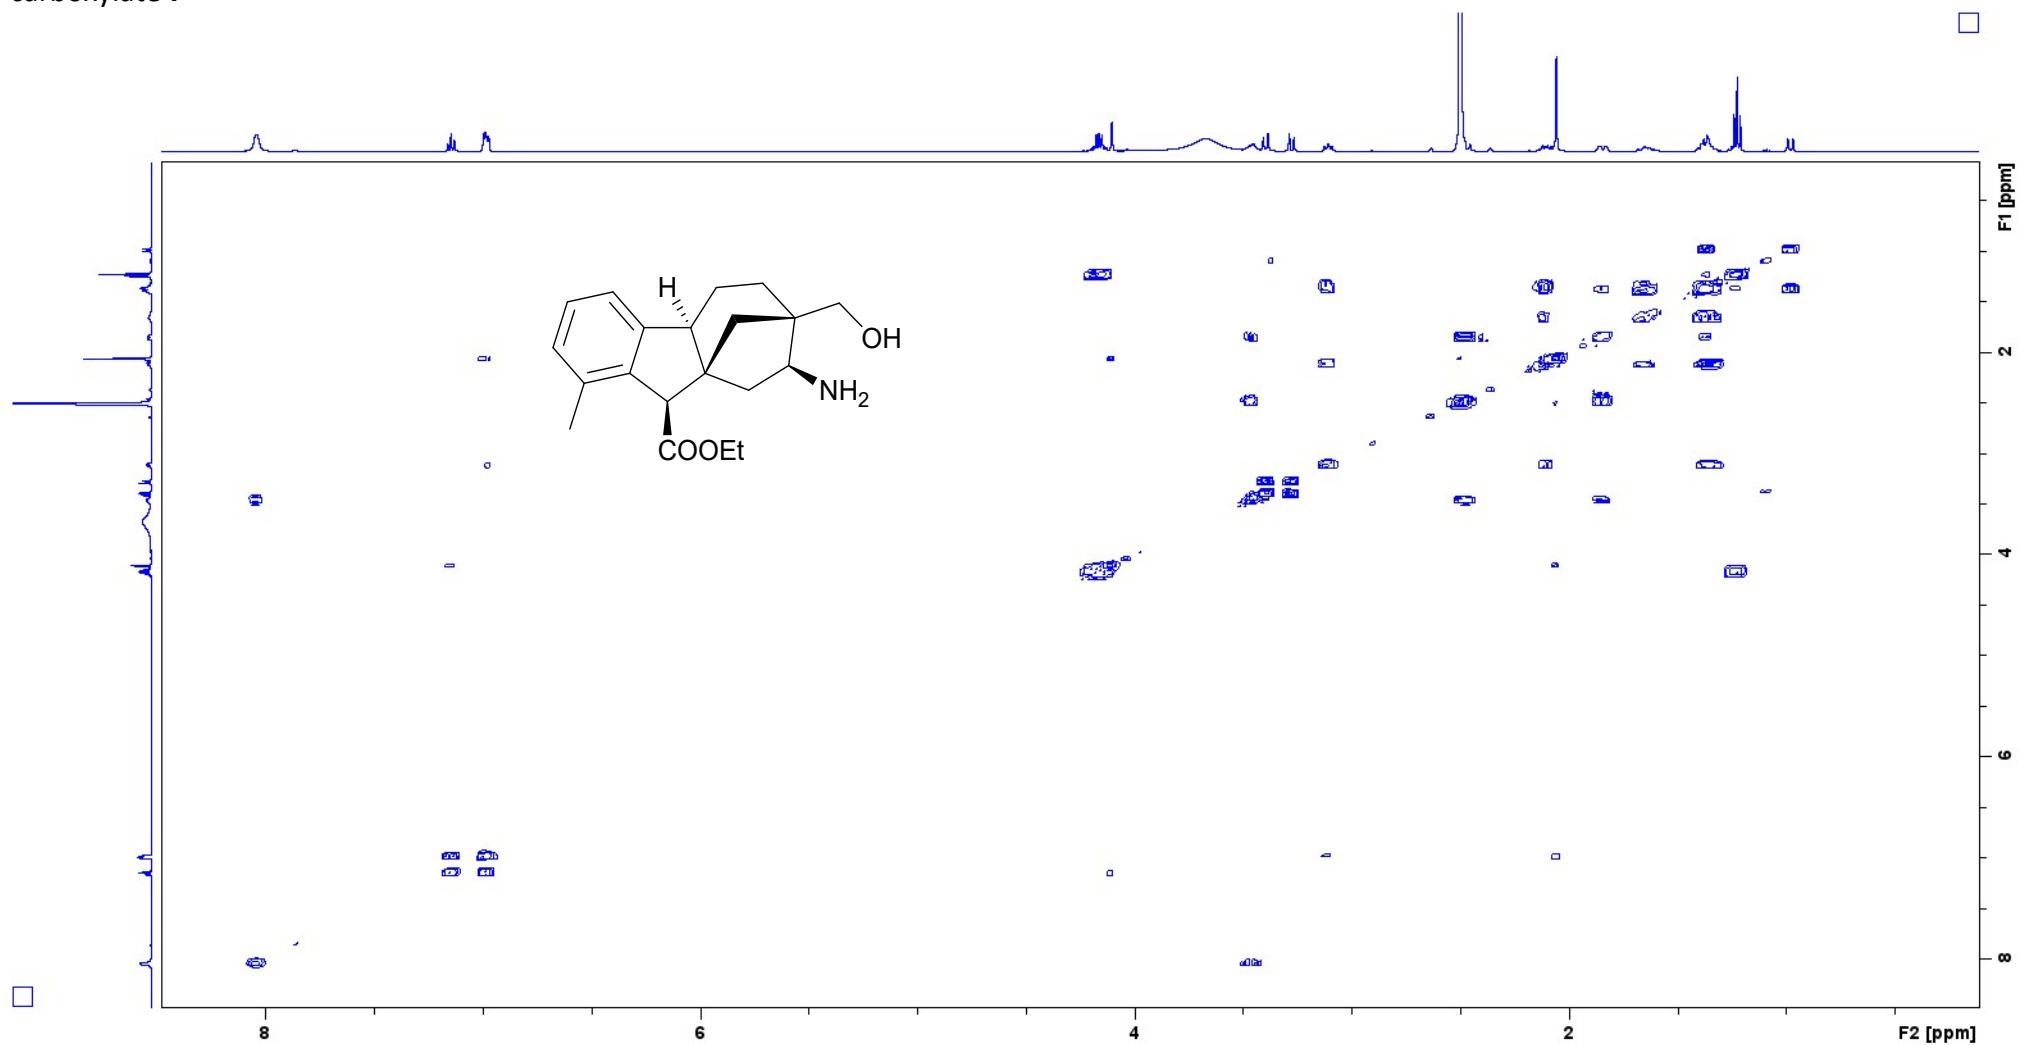

NOESY of ethyl (4*b**S*,7*R*,8*S*,9*a**S*,10*R*)-8-amino-7-(hydroxymethyl)-1-methyl-4*b*,6,7,8,9,10-hexahydro-5*H*-7,9*a*-methanobenzo[*a*]azulene-10-carboxylate **7**

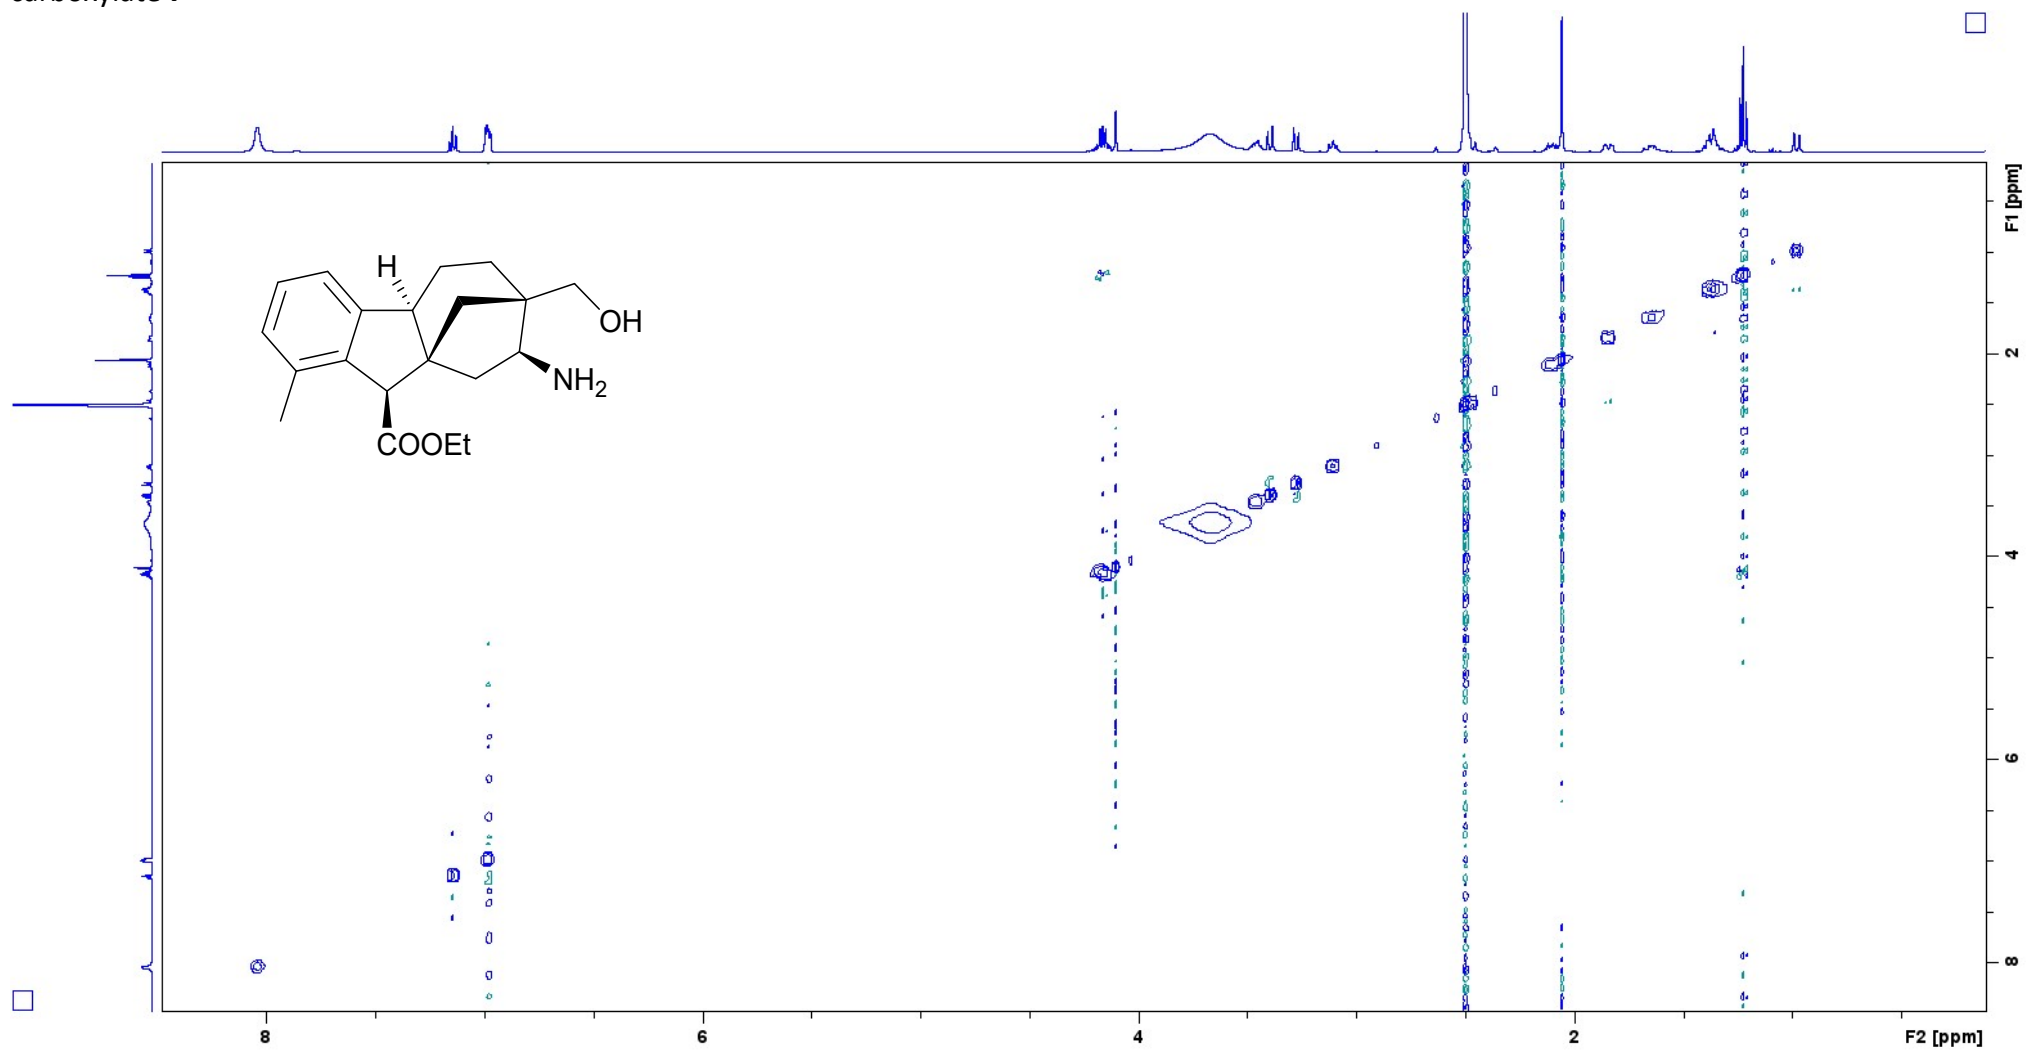

HSQC of ethyl (4*S*,7*R*,8*S*,9*aS*,10*R*)-8-amino-7-(hydroxymethyl)-1-methyl-4*b*,6,7,8,9,10-hexahydro-5*H*-7,9*a*-methanobenzo[*a*]azulene-10-carboxylate **7**

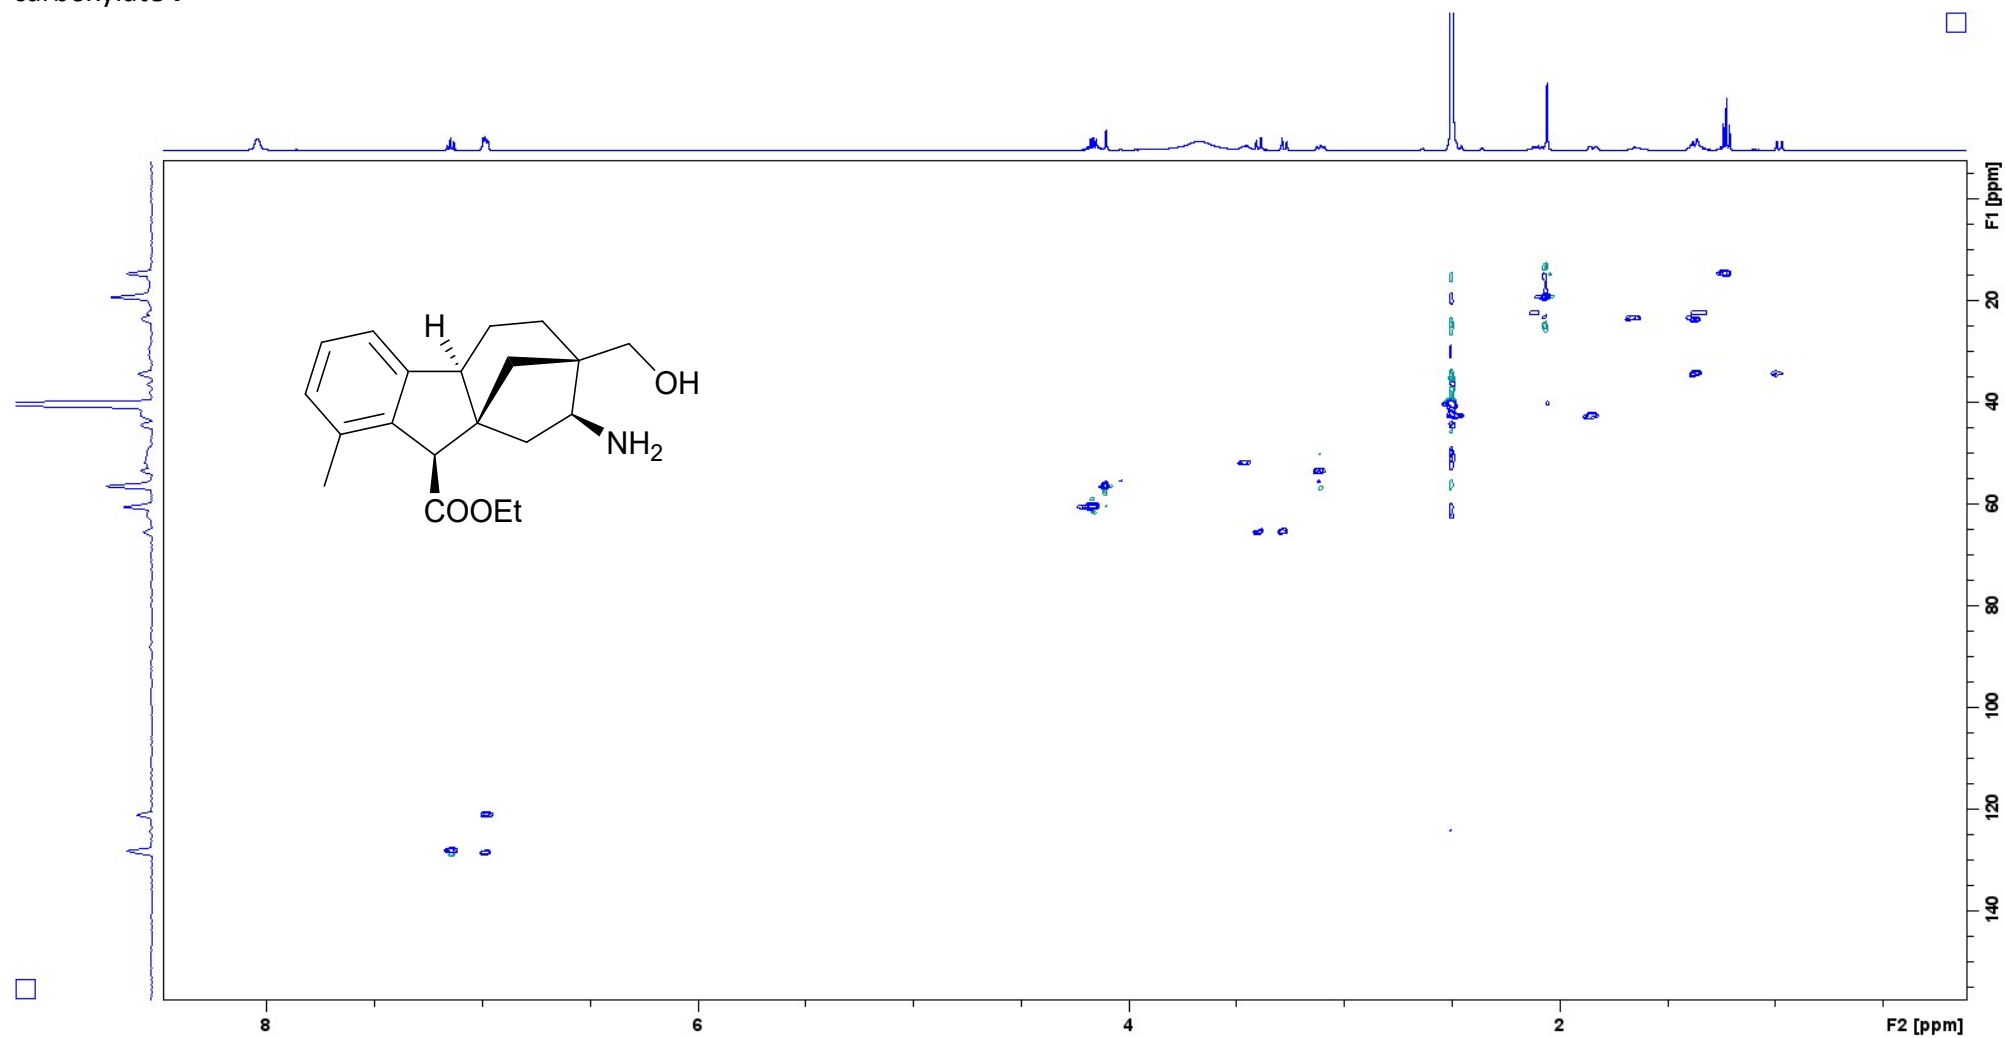

HMBC of ethyl (4*bS*,7*R*,8*S*,9*aS*,10*R*)-8-amino-7-(hydroxymethyl)-1-methyl-4*b*,6,7,8,9,10-hexahydro-5*H*-7,9*a*-methanobenzo[*a*]azulene-10-carboxylate **7**

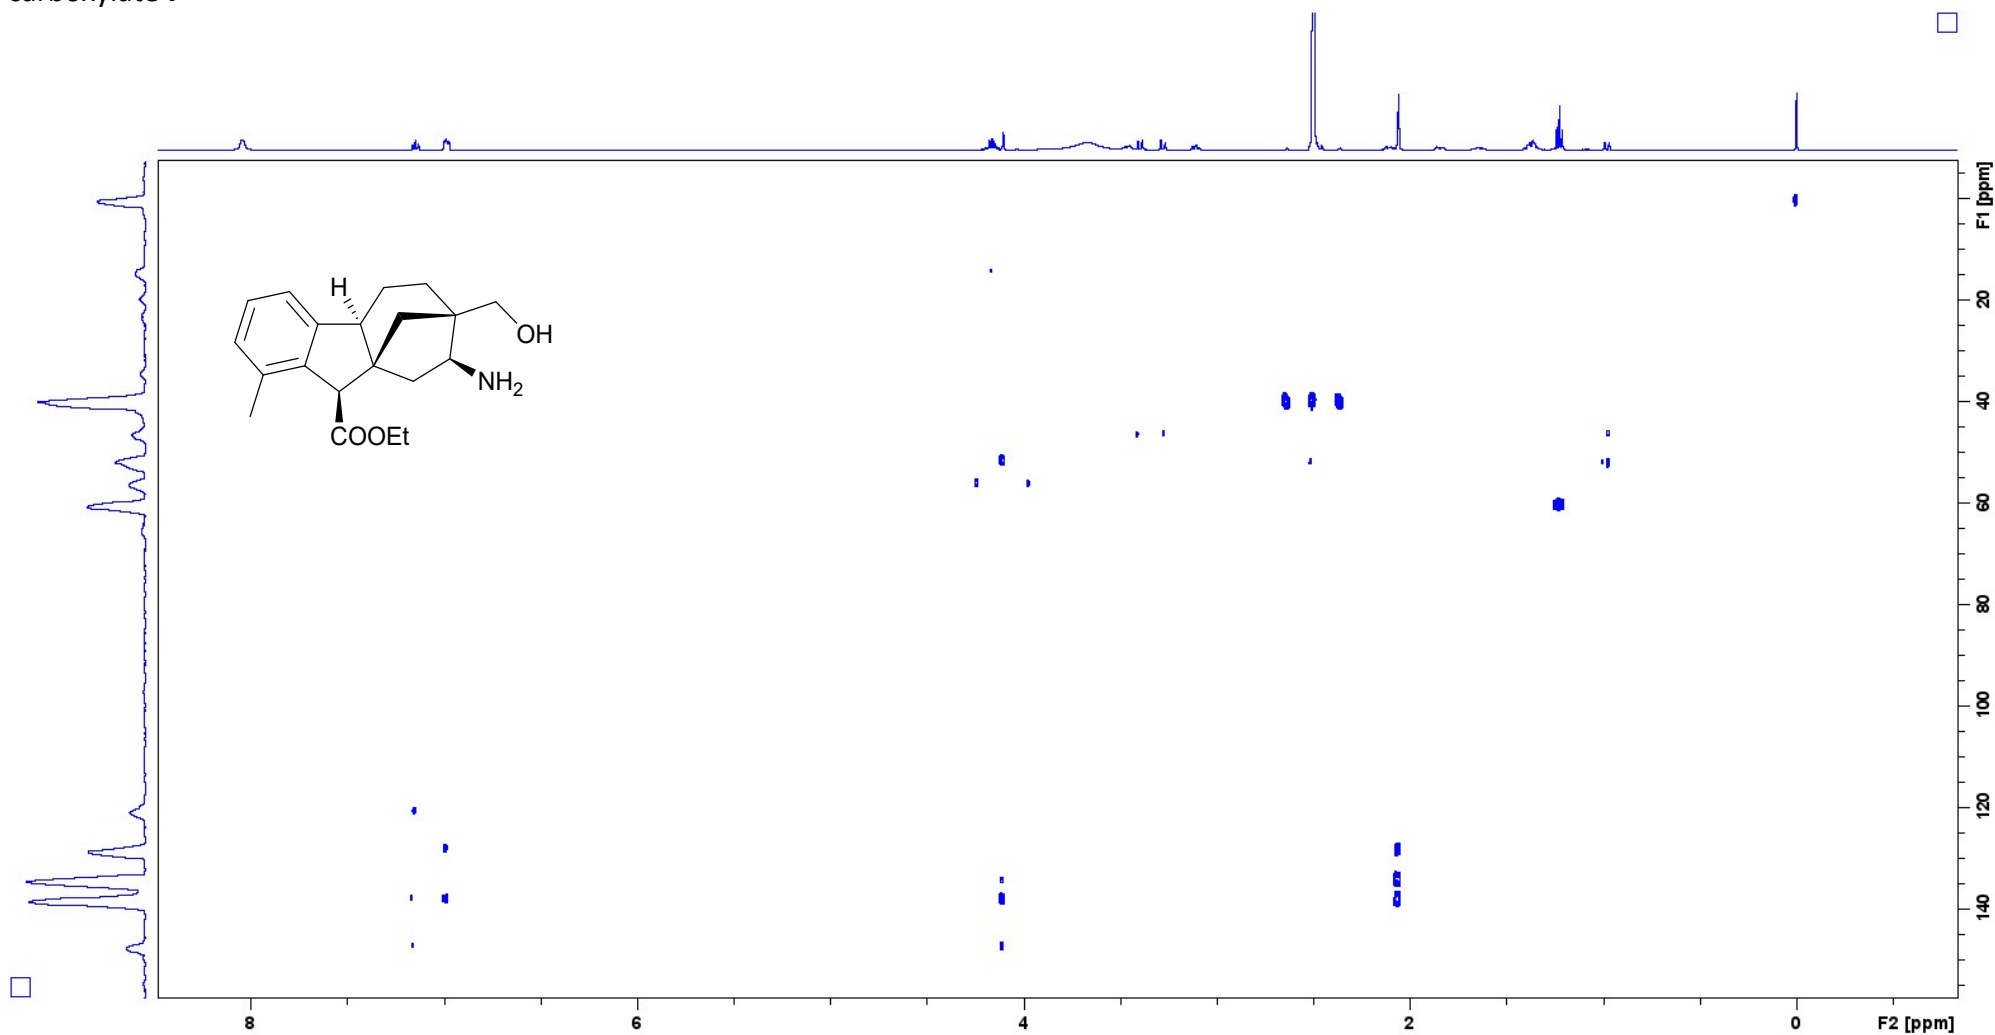

$^1\text{H-NMR}$  of ethyl (4*b**S*,7*S*,9*a**S*,10*R*)-1-methyl-7-(((methylsulfonyl)oxy)methyl)-8-oxo-4*b*,6,7,8,9,10-hexahydro-5*H*-7,9*a*-methanobenzo[*a*]azulene-10-carboxylate **22**

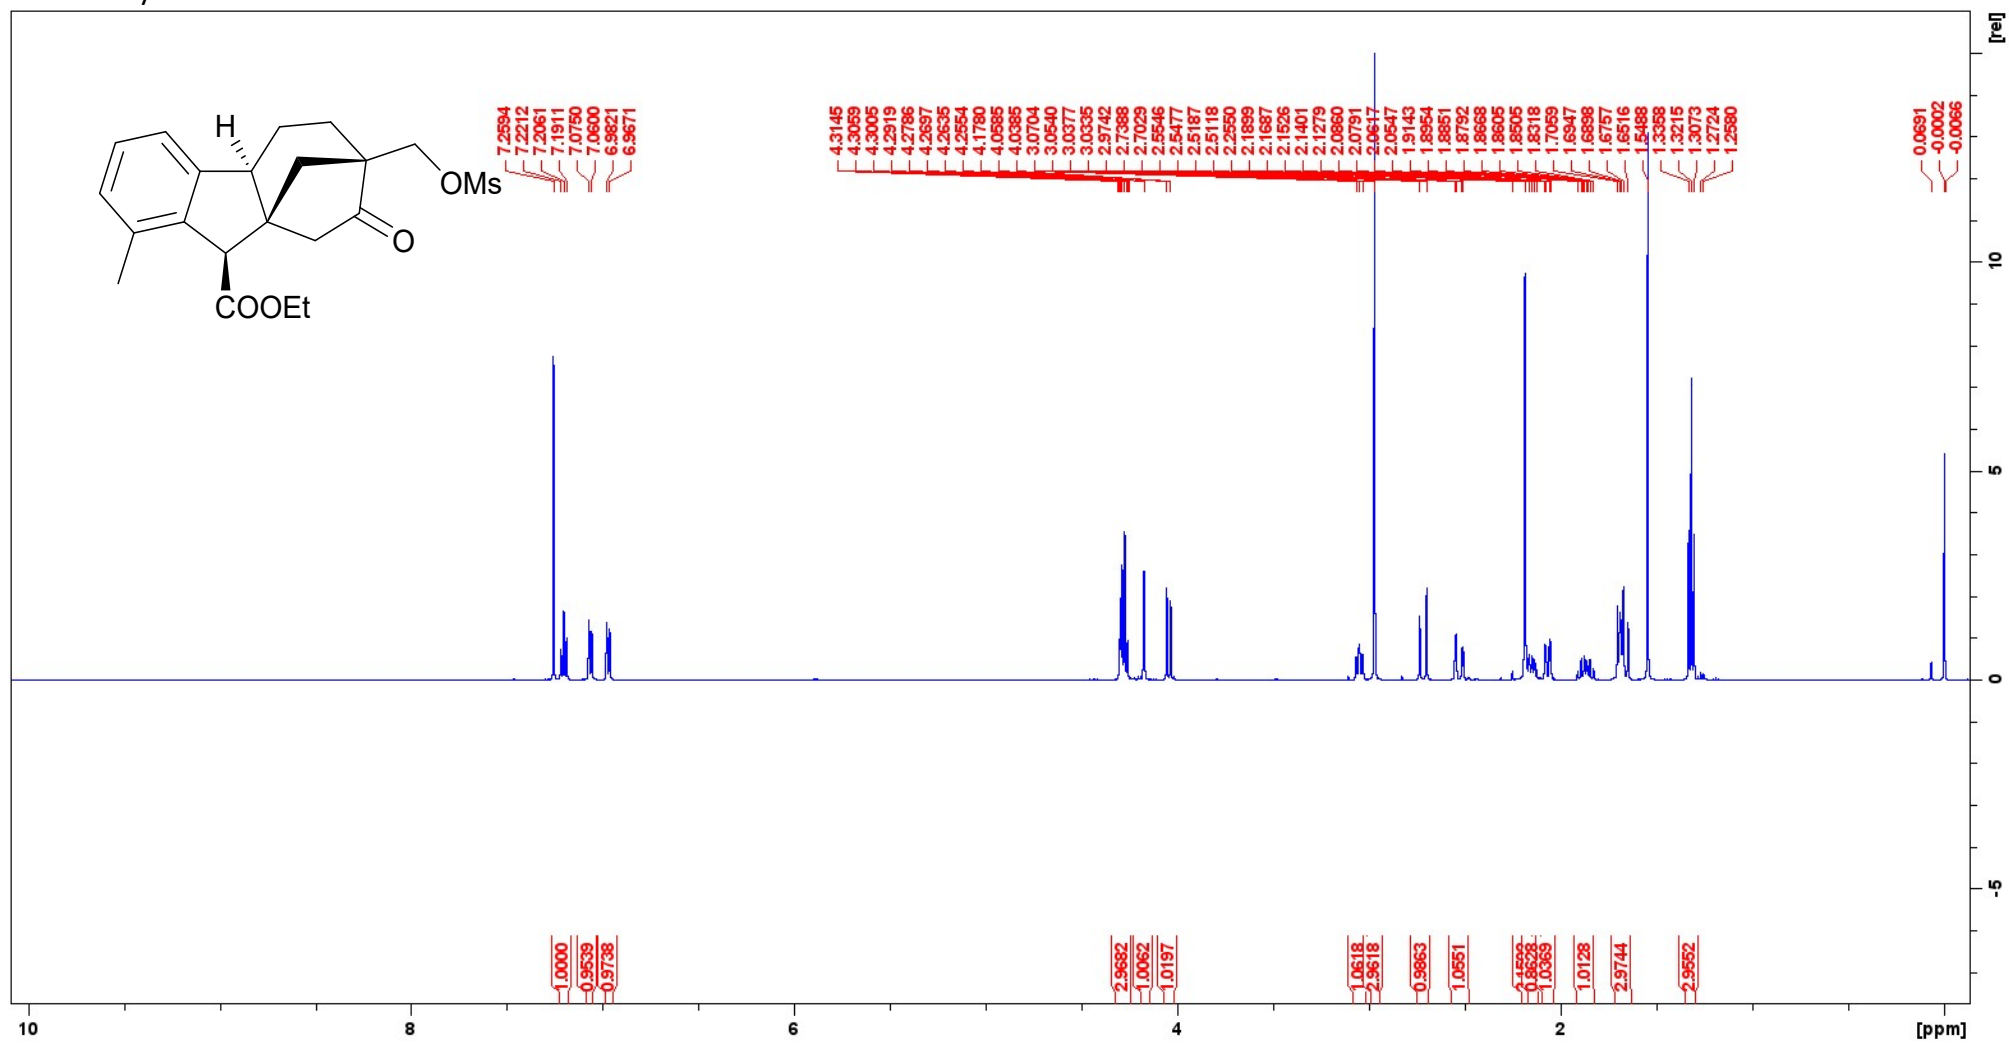

$^{13}\text{C}$ -NMR of ethyl (4*b**S*,7*S*,9*a**S*,10*R*)-1-methyl-7-(((methylsulfonyl)oxy)methyl)-8-oxo-4*b*,6,7,8,9,10-hexahydro-5*H*-7,9*a*-methanobenzo[*a*]azulene-10-carboxylate **22**

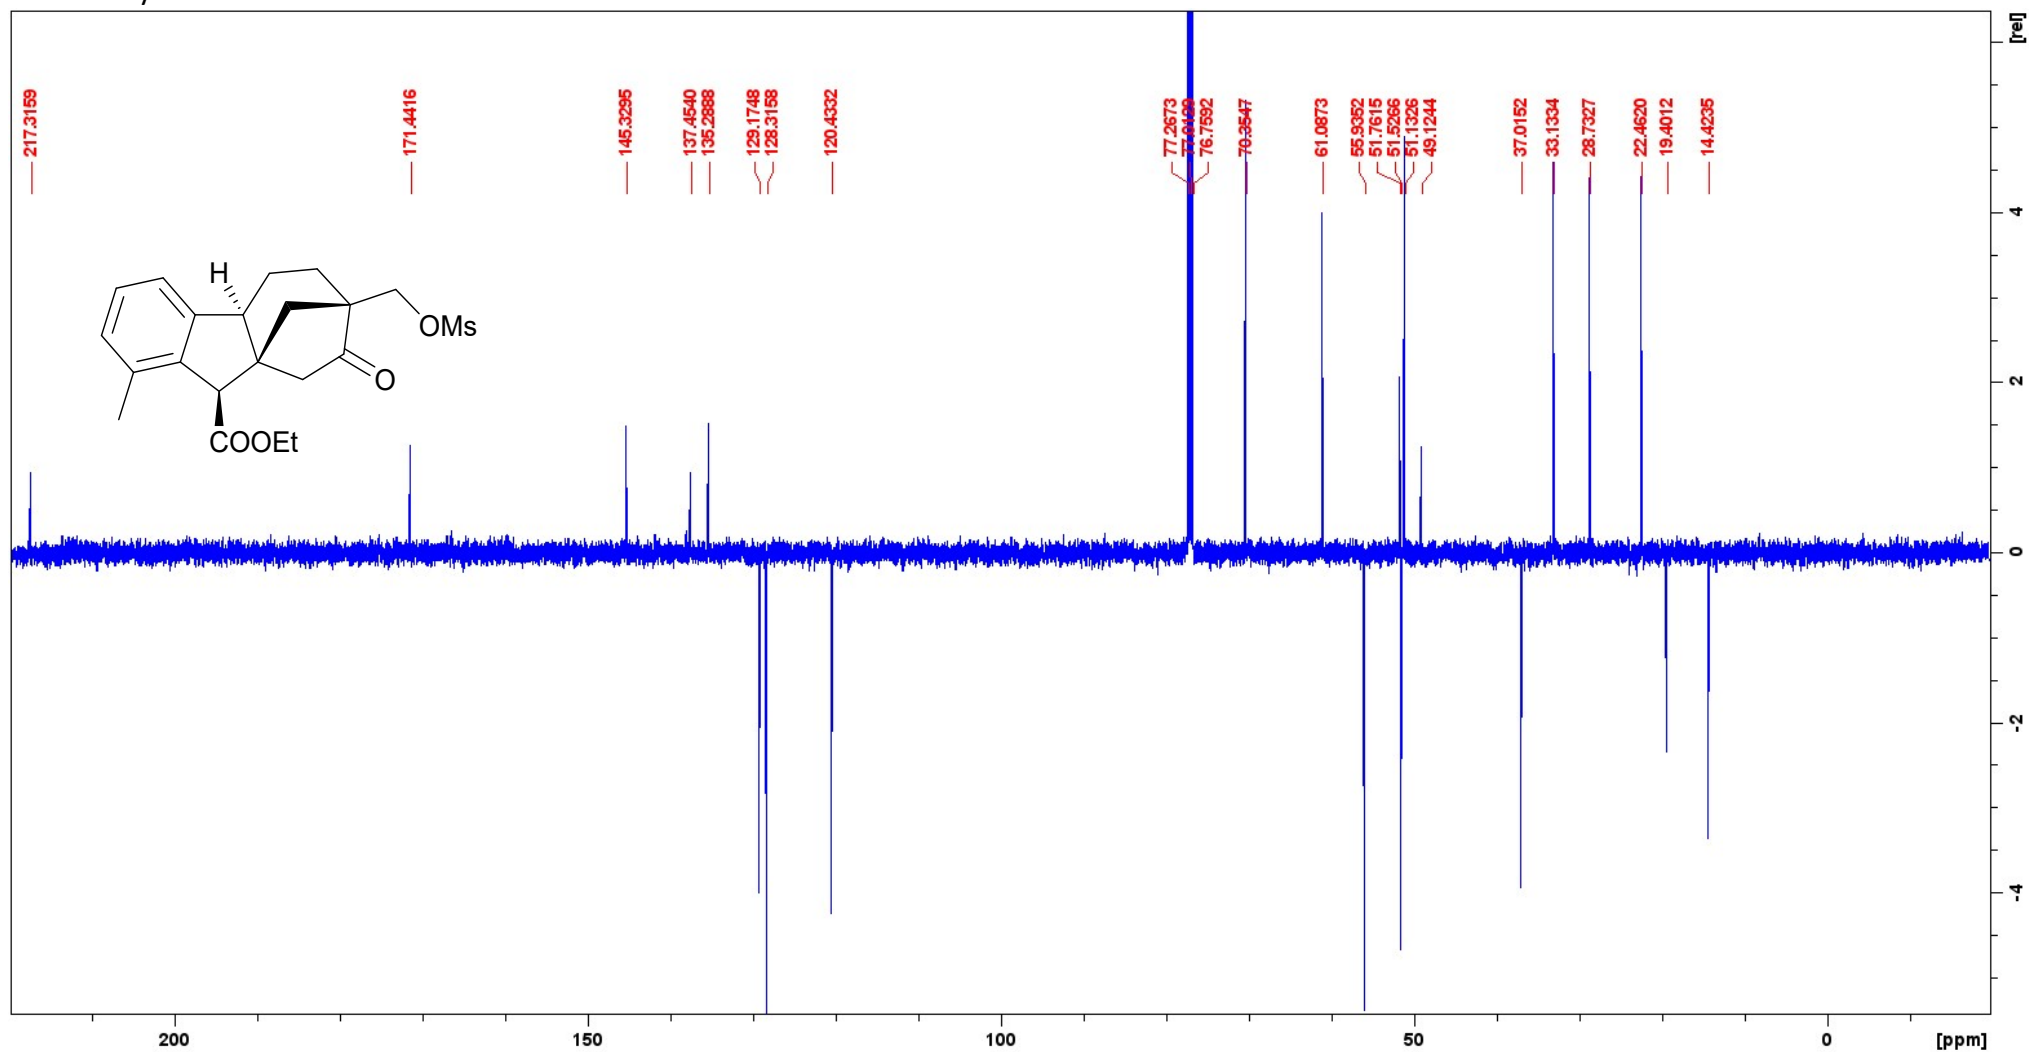



COSY of ethyl (4*b**S*,7*S*,9*a**S*,10*R*)-1-methyl-7-(((methylsulfonyl)oxy)methyl)-8-oxo-4*b*,6,7,8,9,10-hexahydro-5*H*-7,9*a*-methanobenzo[*a*]azulene-10-carboxylate **22**

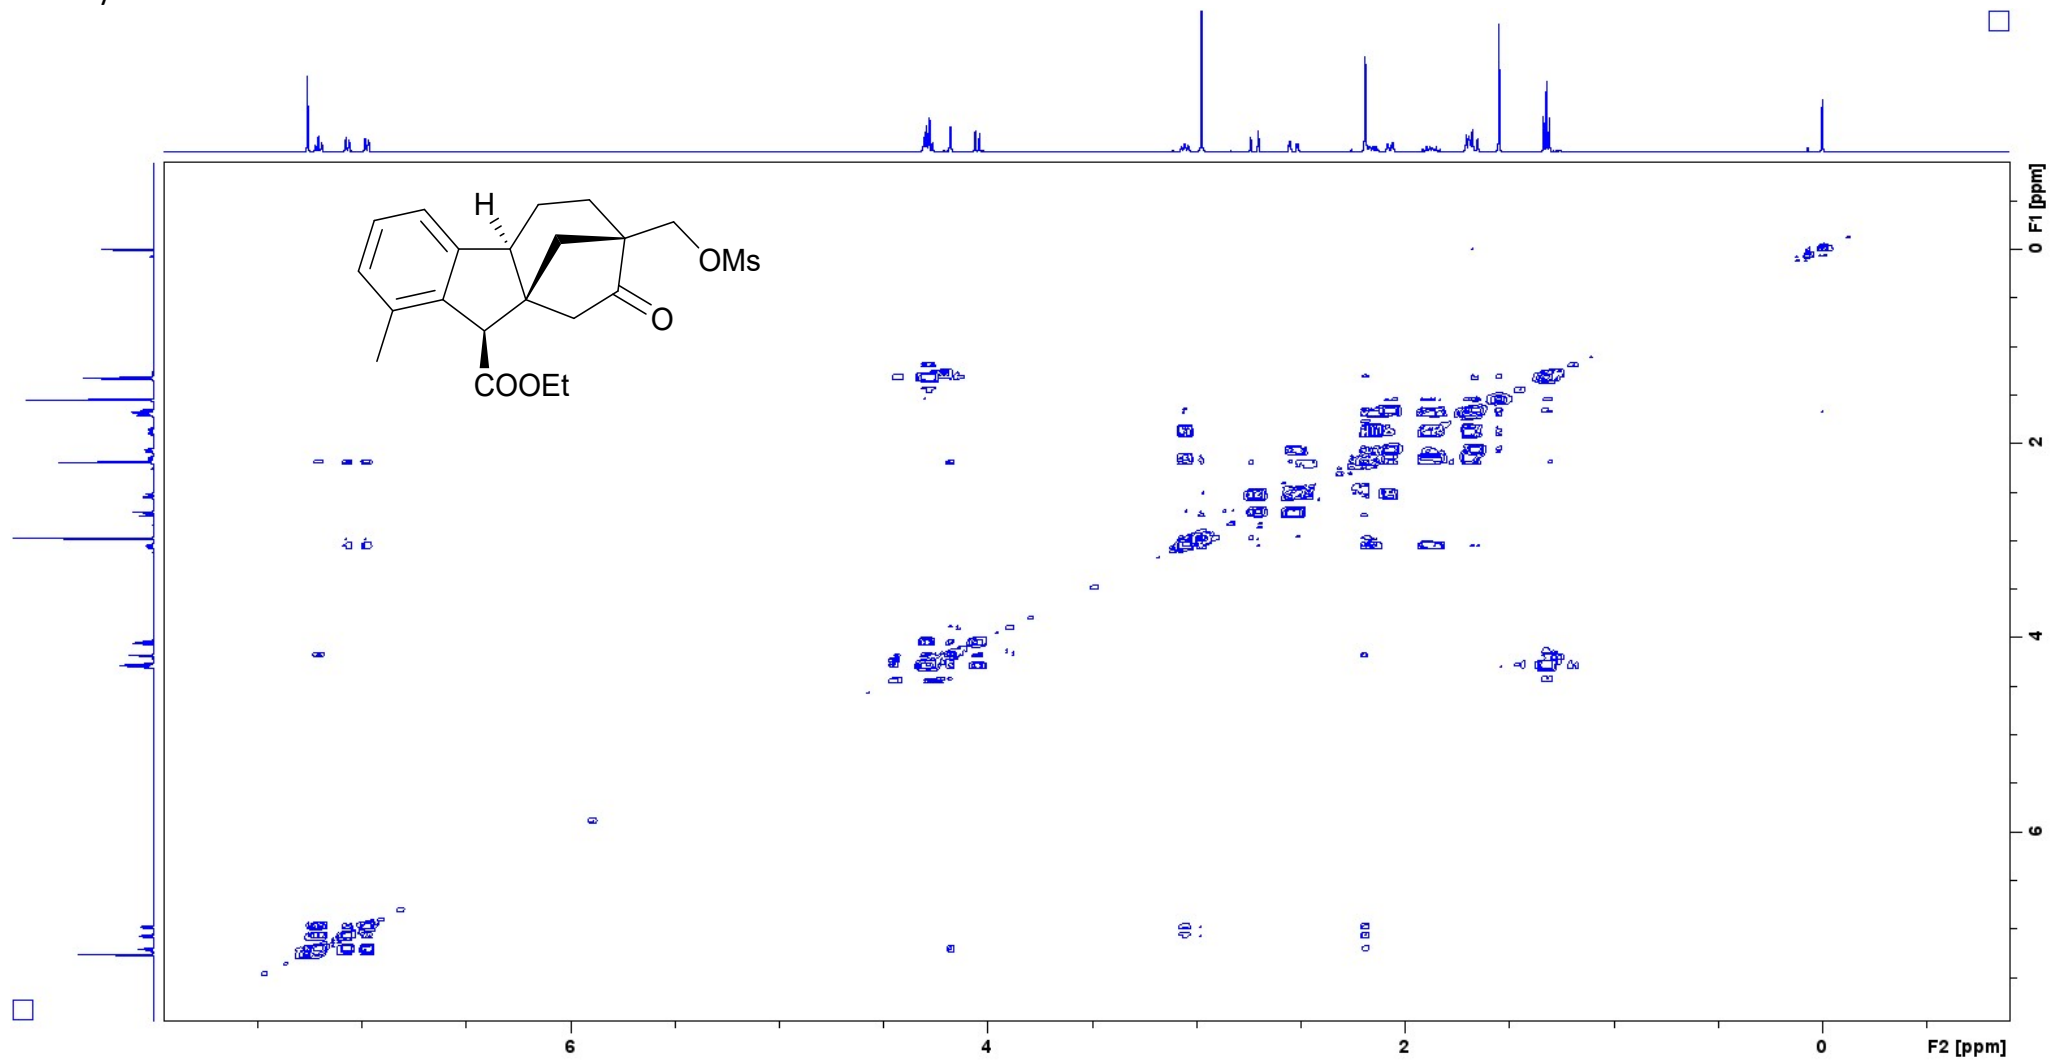

NOESY of ethyl (4*b**S*,7*S*,9*a**S*,10*R*)-1-methyl-7-(((methylsulfonyl)oxy)methyl)-8-oxo-4*b*,6,7,8,9,10-hexahydro-5*H*-7,9*a*-methanobenzo[*a*]azulene-10-carboxylate **22**

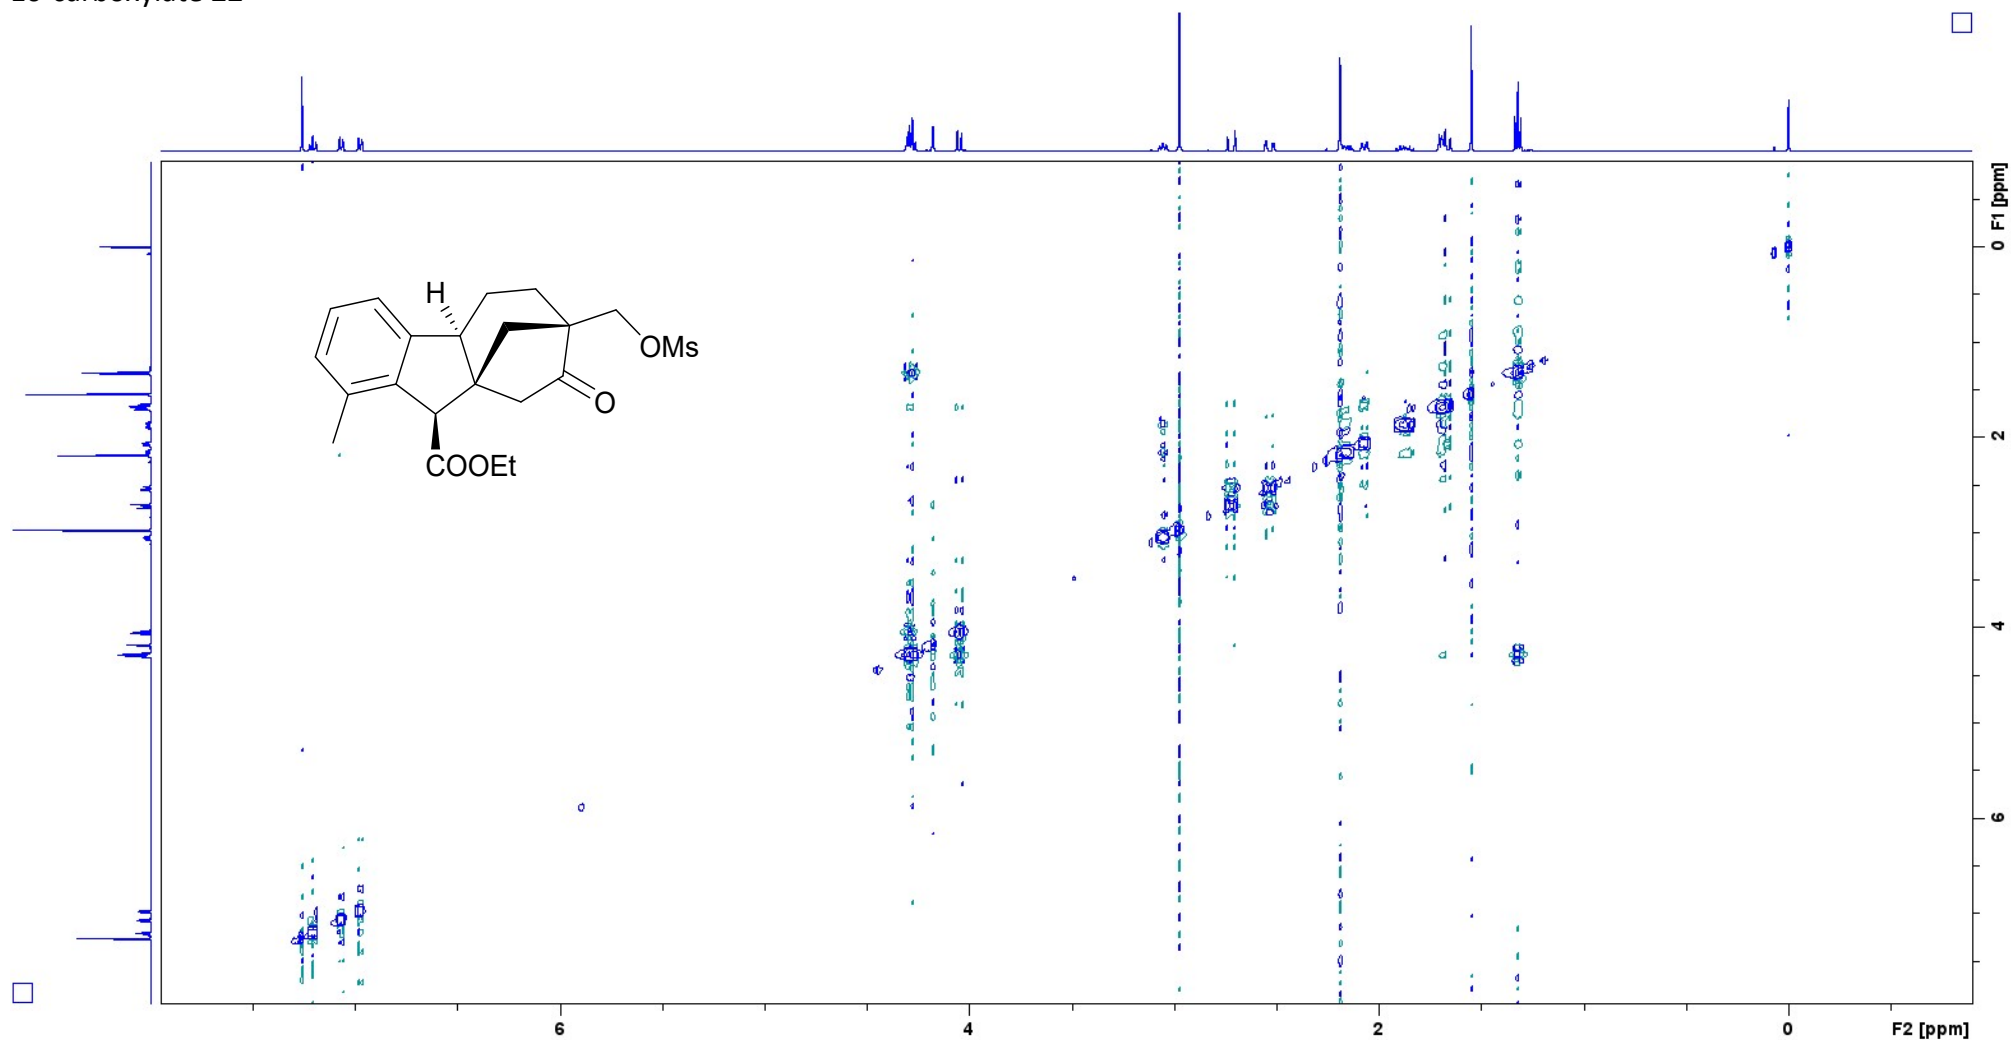

HSQC of ethyl (4*b**S*,7*S*,9*a**S*,10*R*)-1-methyl-7-(((methylsulfonyl)oxy)methyl)-8-oxo-4*b*,6,7,8,9,10-hexahydro-5*H*-7,9*a*-methanobenzo[*a*]azulene-10-carboxylate **22**

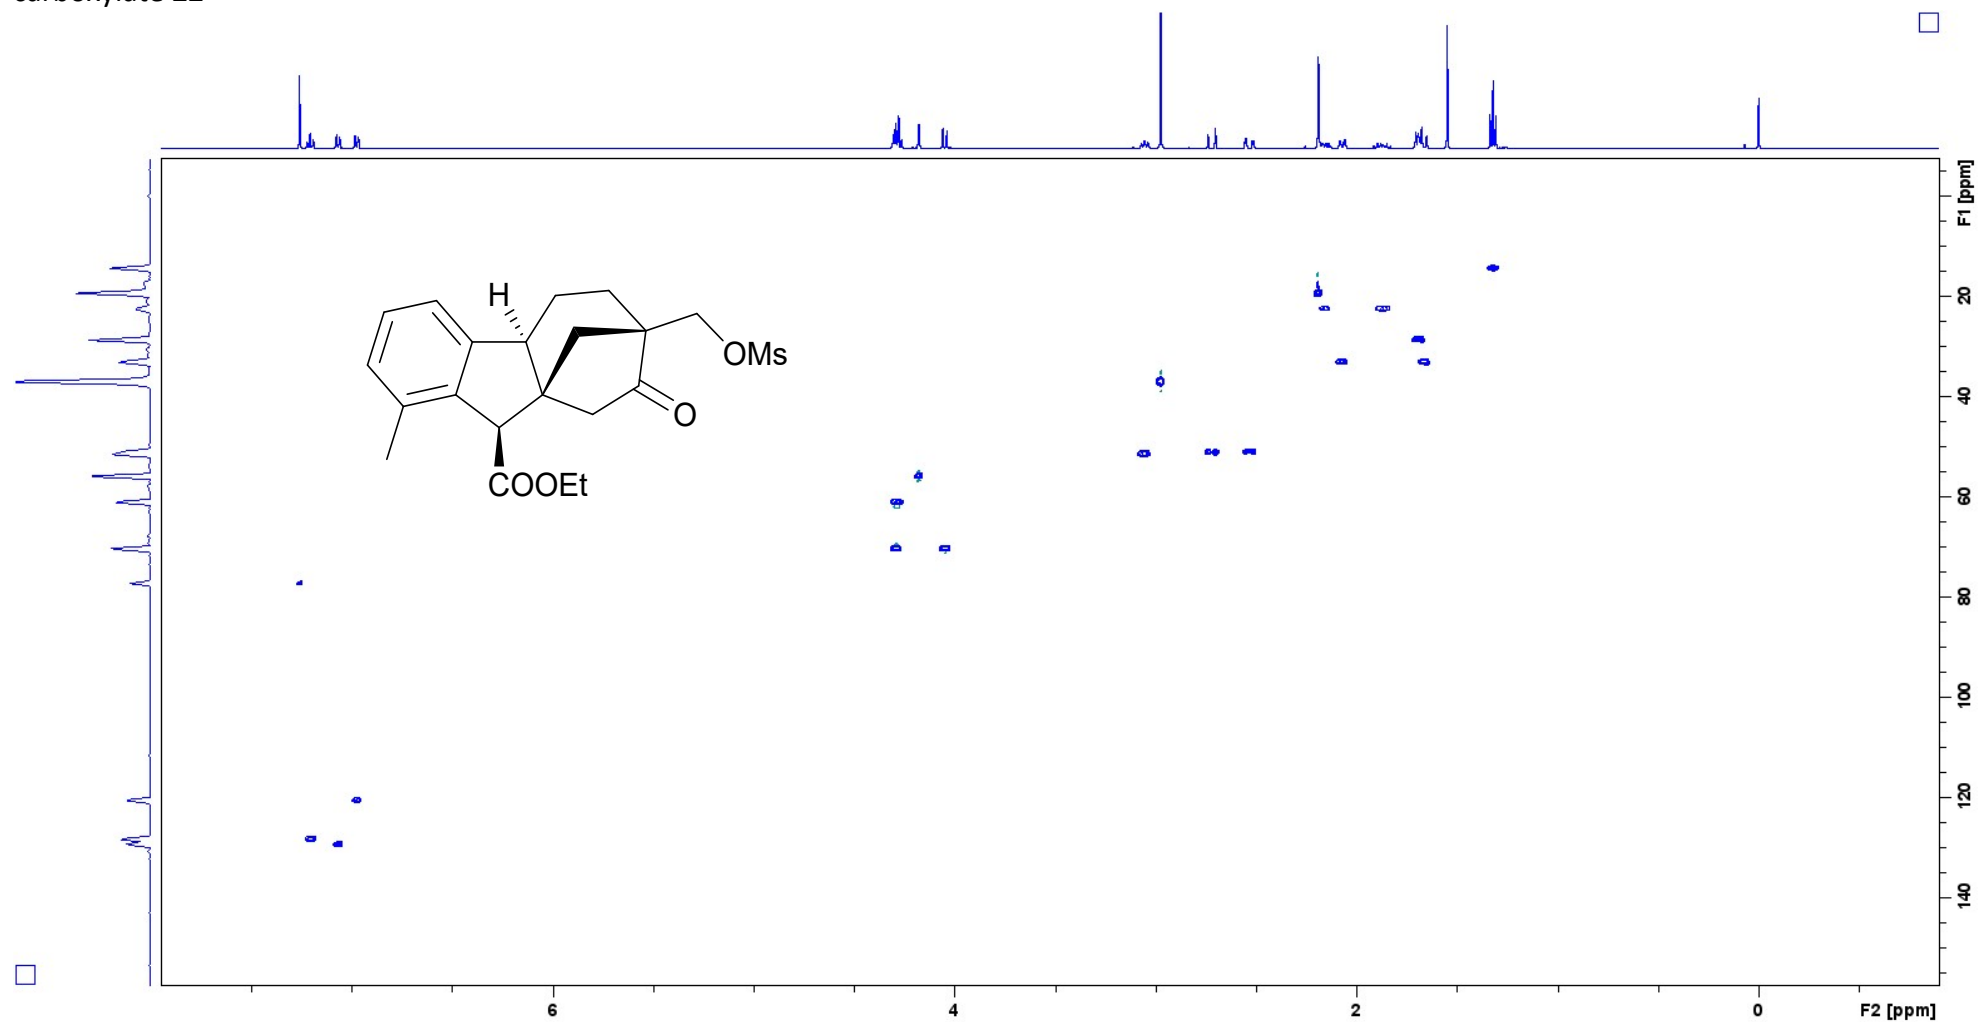

HMBC of ethyl (4*b**S*,7*S*,9*a**S*,10*R*)-1-methyl-7-(((methylsulfonyl)oxy)methyl)-8-oxo-4*b*,6,7,8,9,10-hexahydro-5*H*-7,9*a*-methanobenzo[*a*]azulene-10-carboxylate **22**

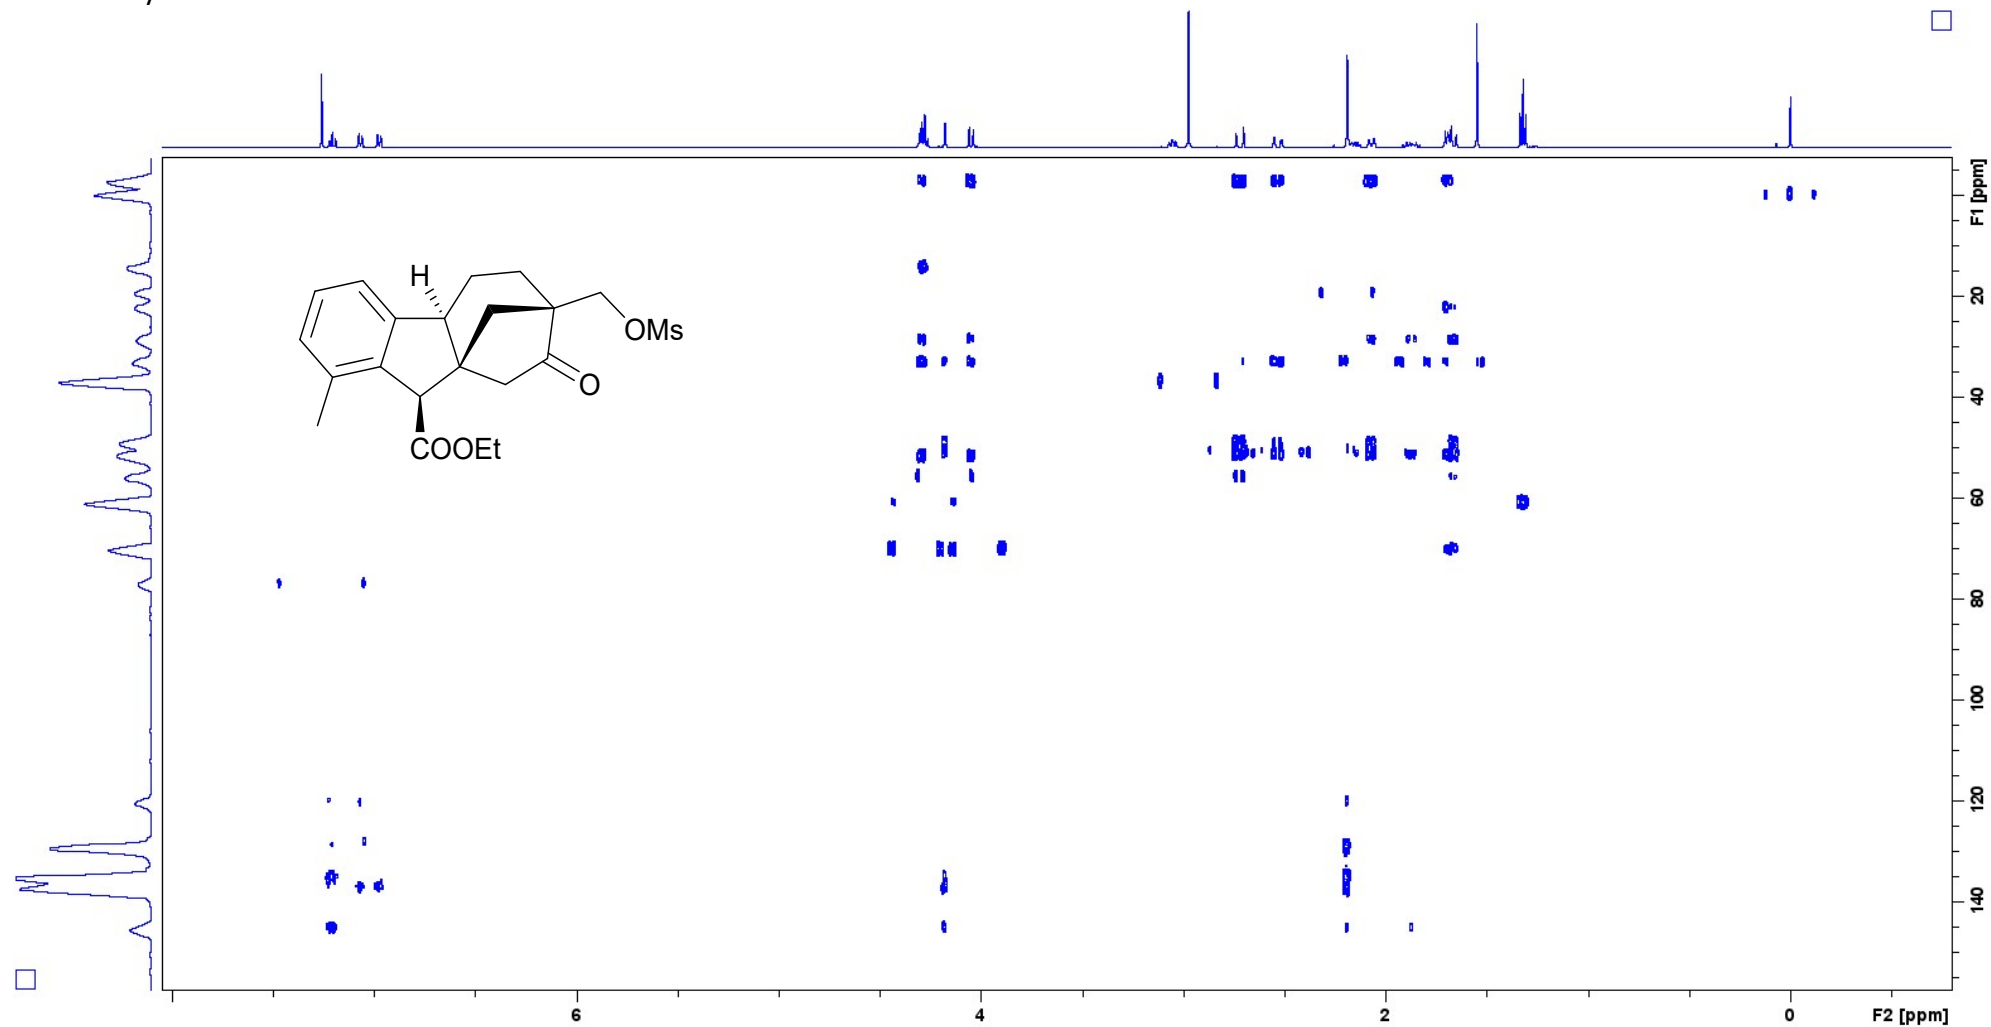

<sup>1</sup>H-NMR of ethyl (4bS,7S,8R,9aS,10R)-8-hydroxy-1-methyl-7-(((methylsulfonyl)oxy)methyl)-4b,6,7,8,9,10-hexahydro-5H-7,9a-methanobenzo[a]azulene-10-carboxylate **23**

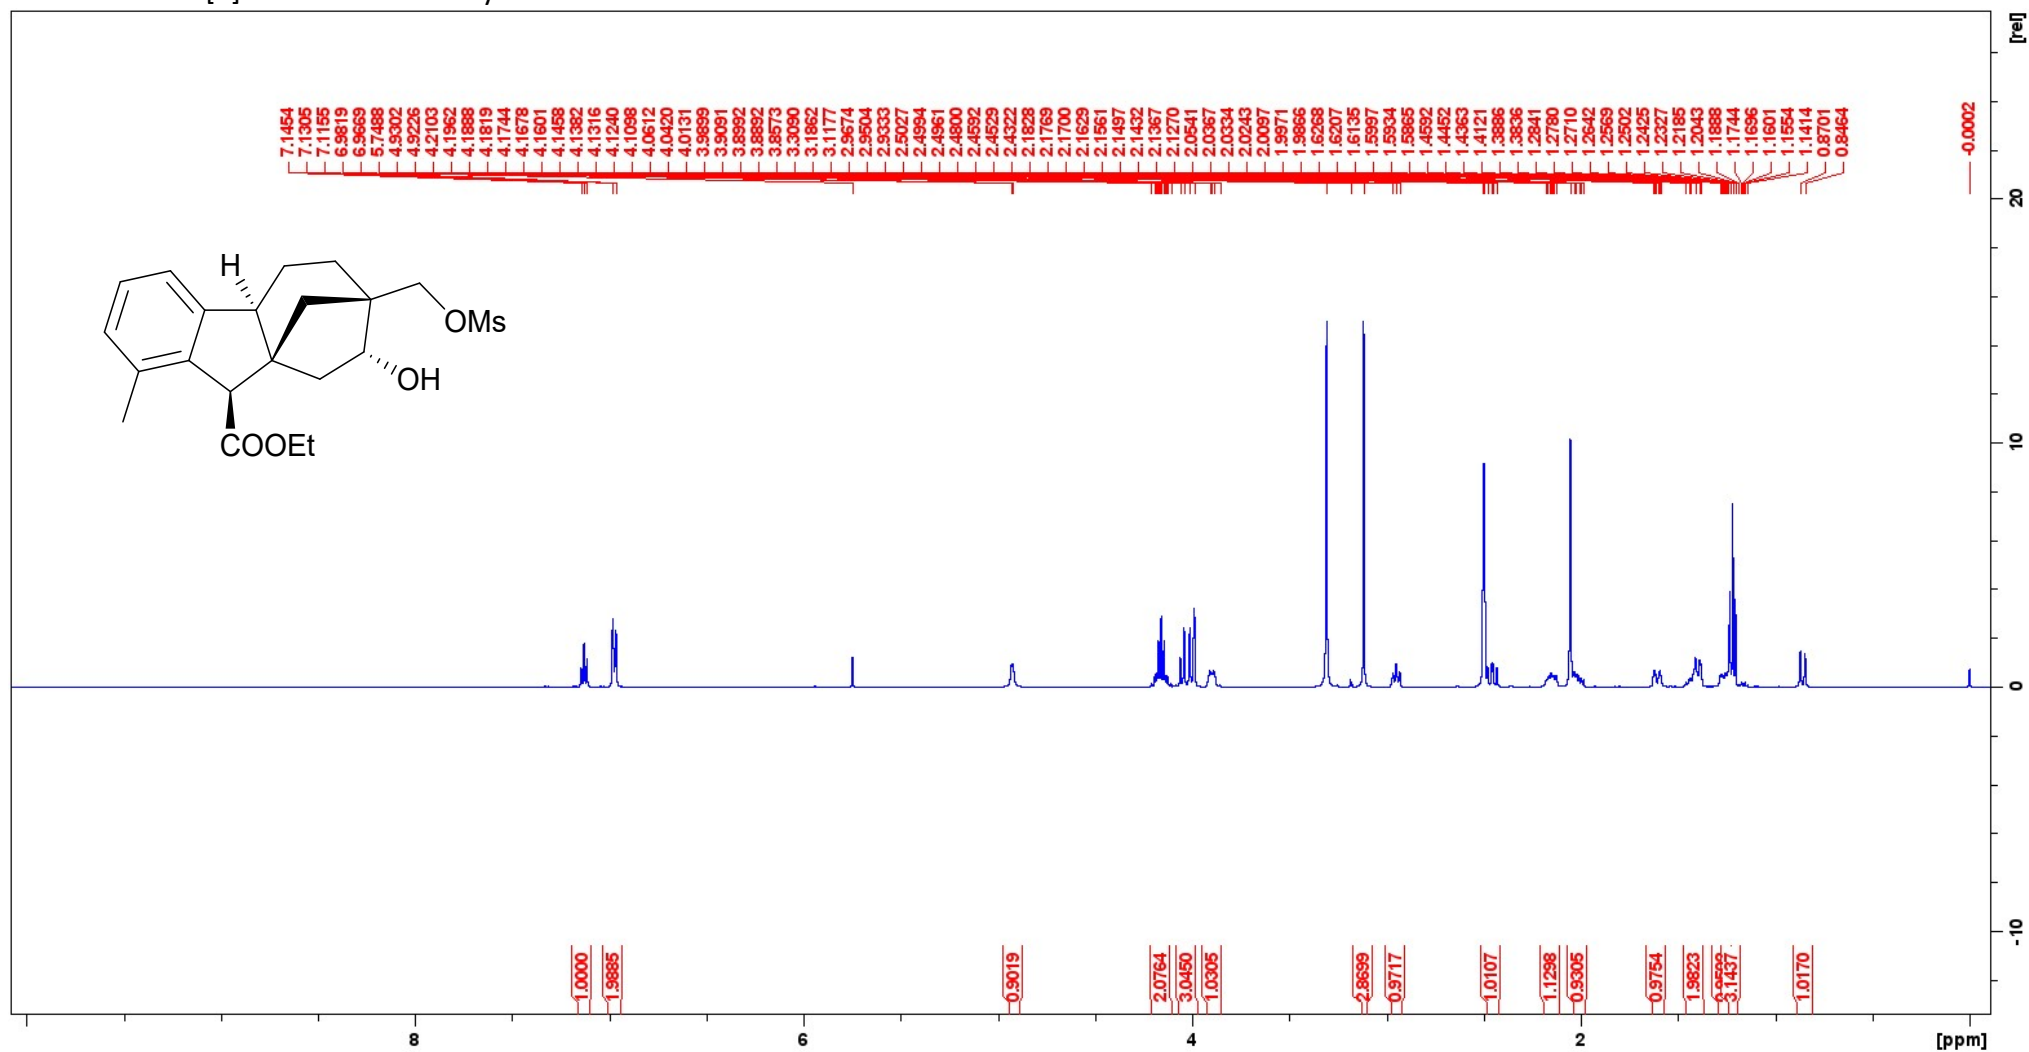

<sup>13</sup>C-NMR of ethyl (4*b*S,7*S*,8*R*,9*a*S,10*R*)-8-hydroxy-1-methyl-7-(((methylsulfonyl)oxy)methyl)-4*b*,6,7,8,9,10-hexahydro-5*H*-7,9*a*-methanobenzo[*a*]azulene-10-carboxylate **23**

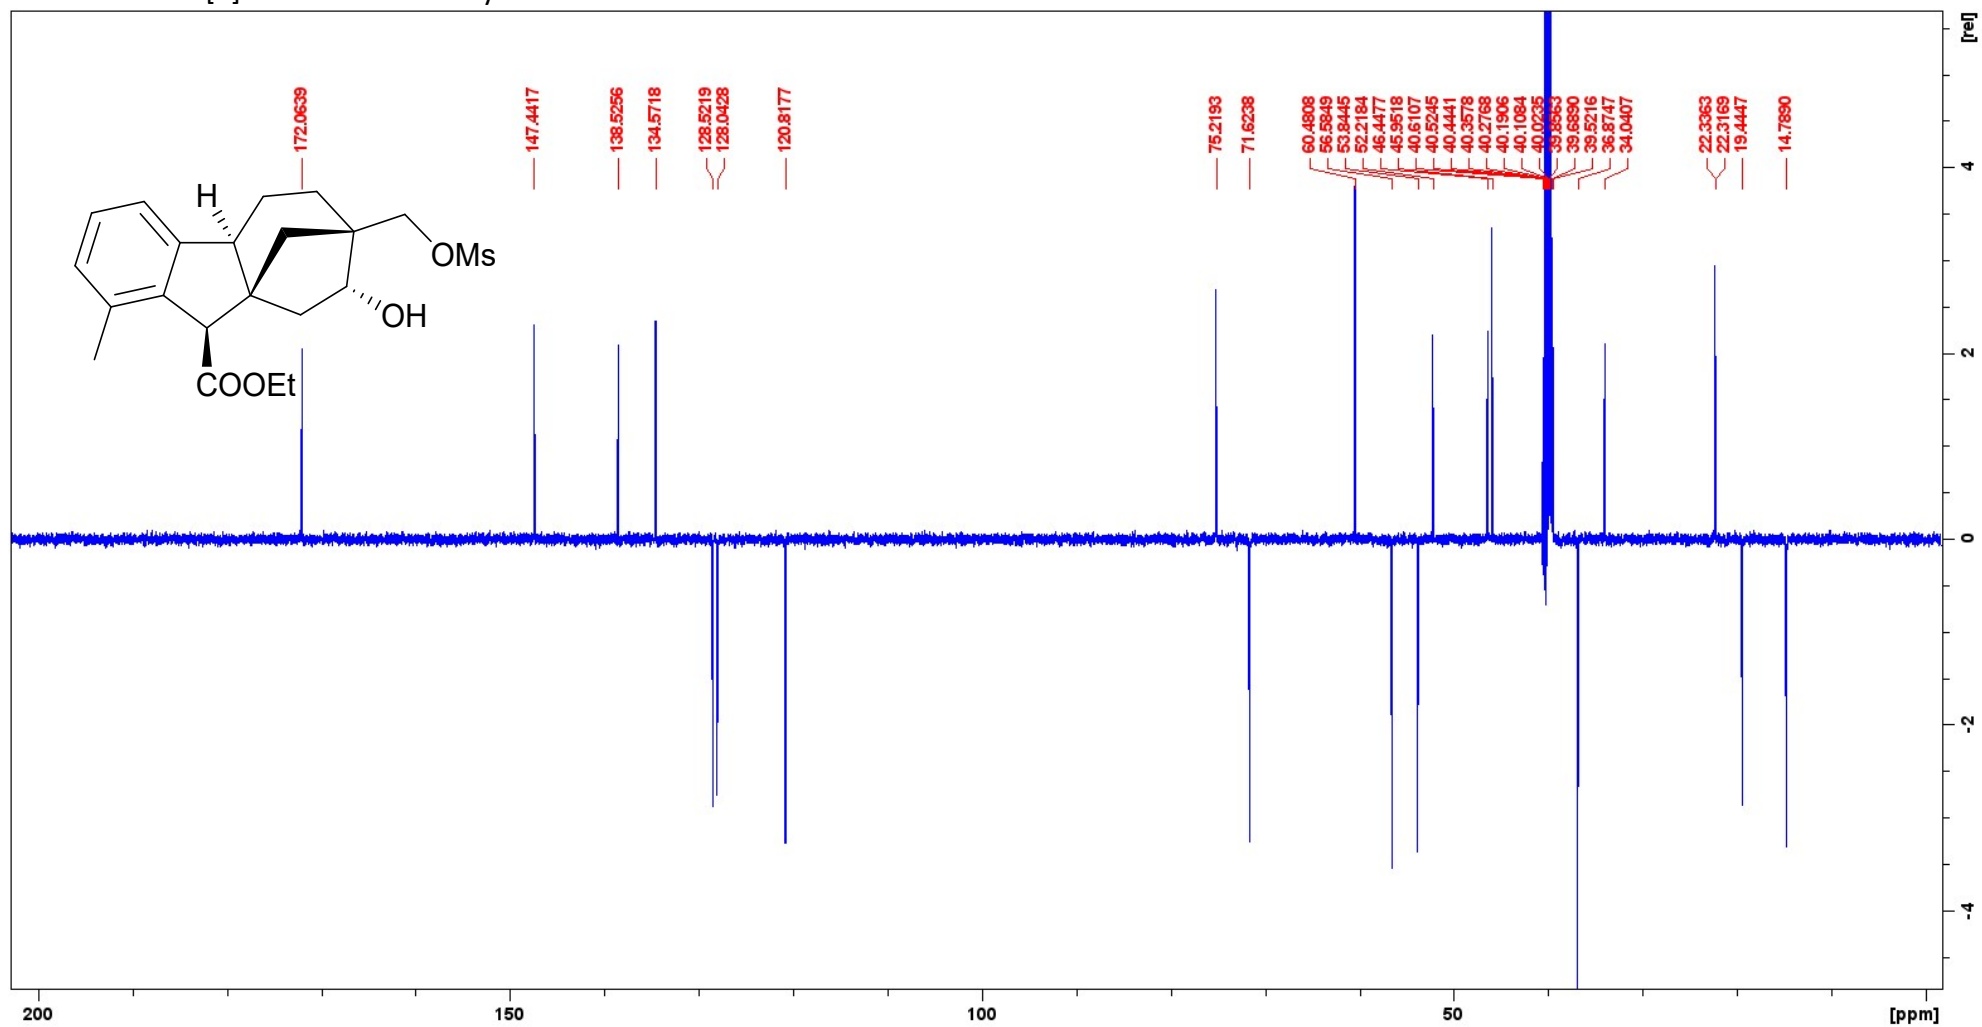

COSY of ethyl (4*bS*,7*S*,8*R*,9*aS*,10*R*)-8-hydroxy-1-methyl-7-(((methylsulfonyl)oxy)methyl)-4*b*,6,7,8,9,10-hexahydro-5*H*-7,9*a*-methanobenzo[*a*]azulene-10-carboxylate **23**

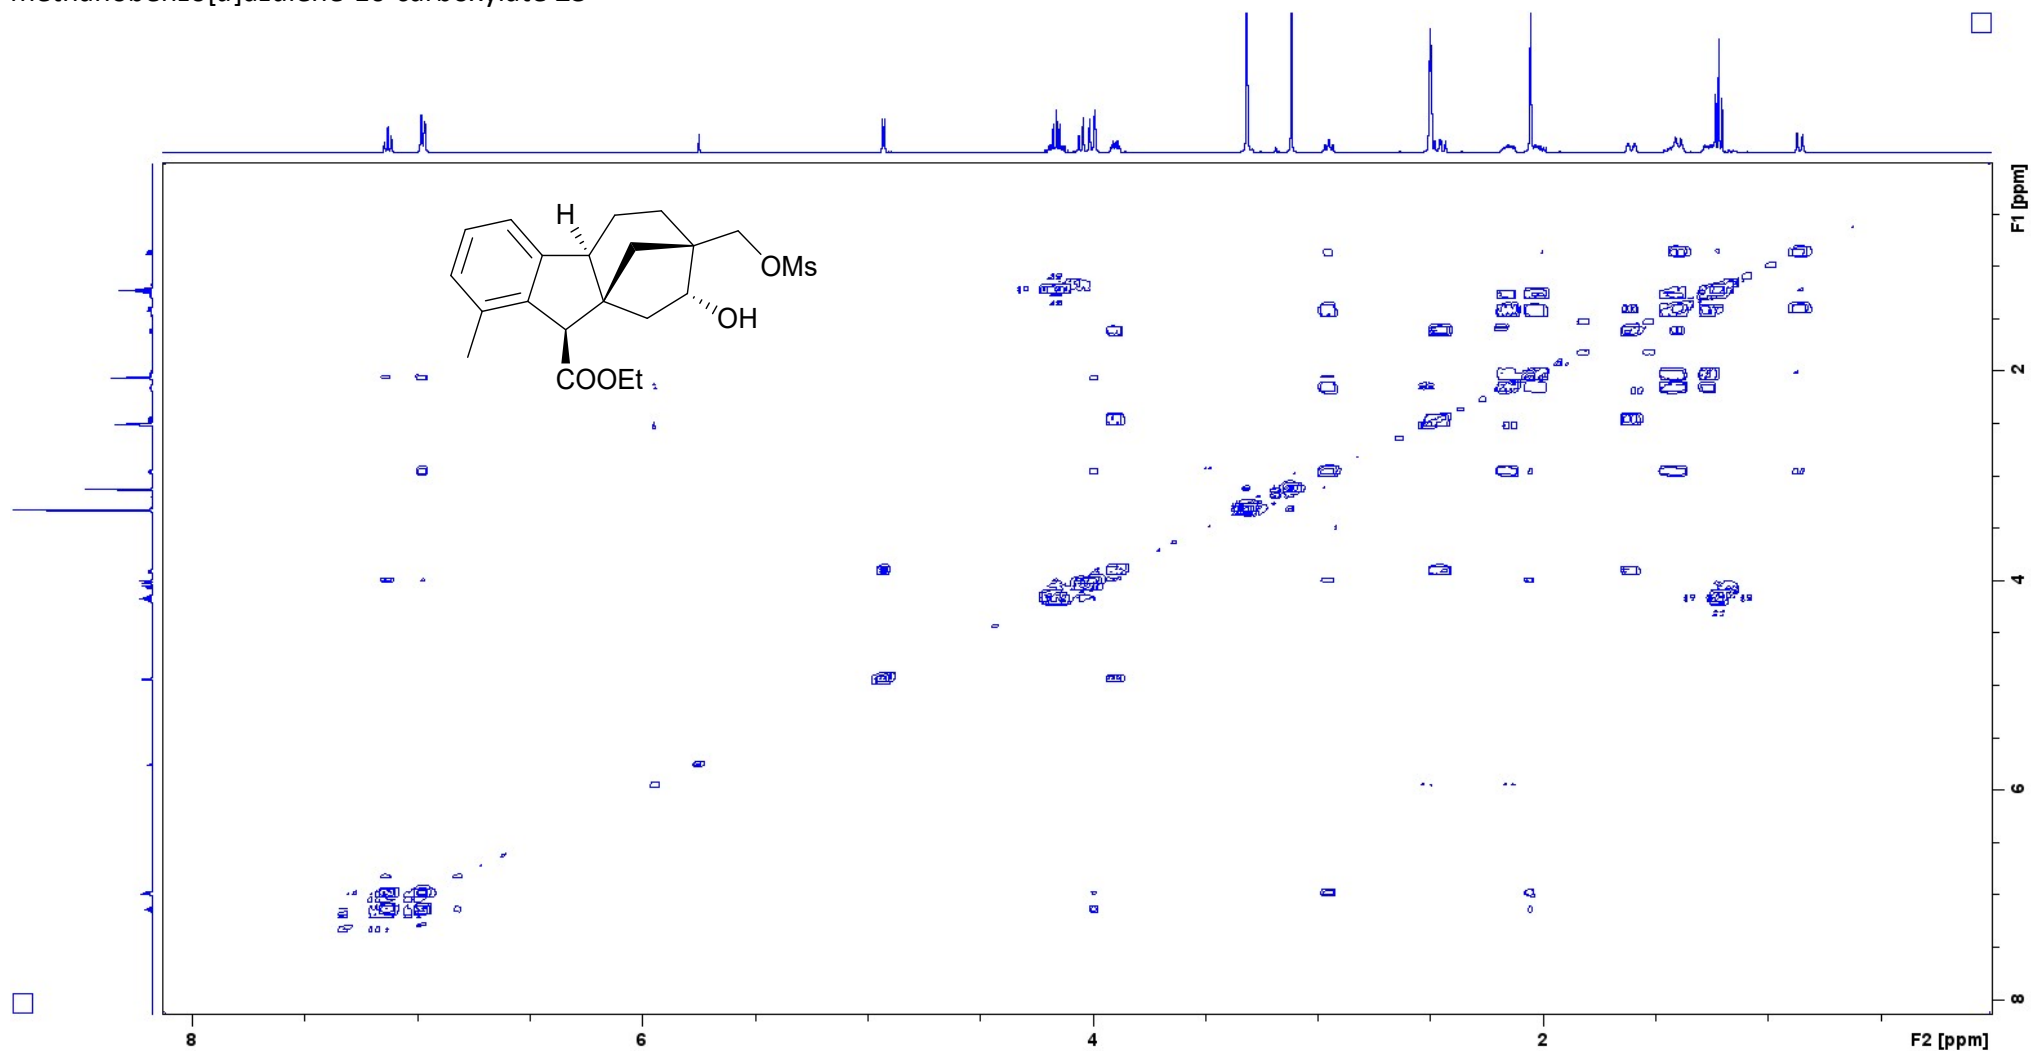

NOESY of ethyl (4*b*S,7*S*,8*R*,9*a*S,10*R*)-8-hydroxy-1-methyl-7-(((methylsulfonyl)oxy)methyl)-4*b*,6,7,8,9,10-hexahydro-5*H*-7,9*a*-methanobenzo[*a*]azulene-10-carboxylate **23**

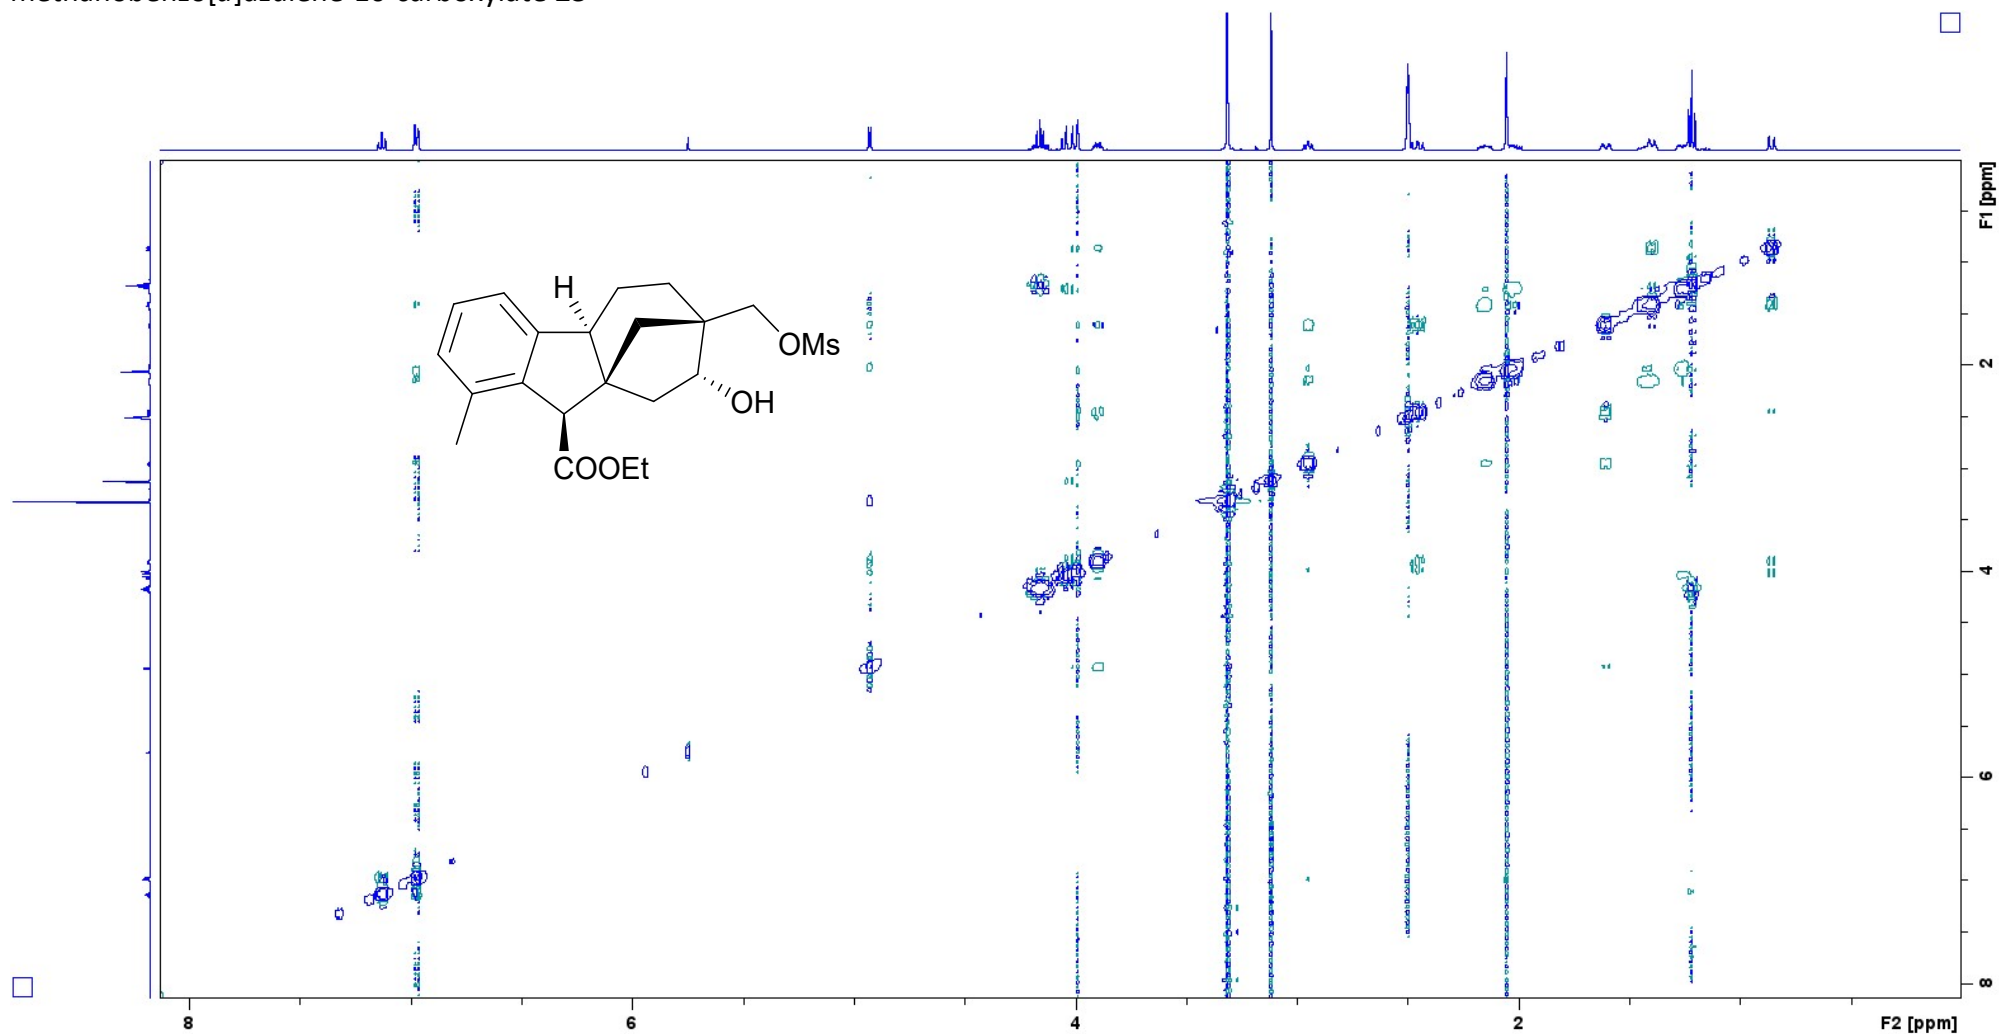



HSQC of ethyl (4*bS*,7*S*,8*R*,9*aS*,10*R*)-8-hydroxy-1-methyl-7-(((methylsulfonyl)oxy)methyl)-4*b*,6,7,8,9,10-hexahydro-5*H*-7,9a-methanobenzo[*a*]azulene-10-carboxylate **23**

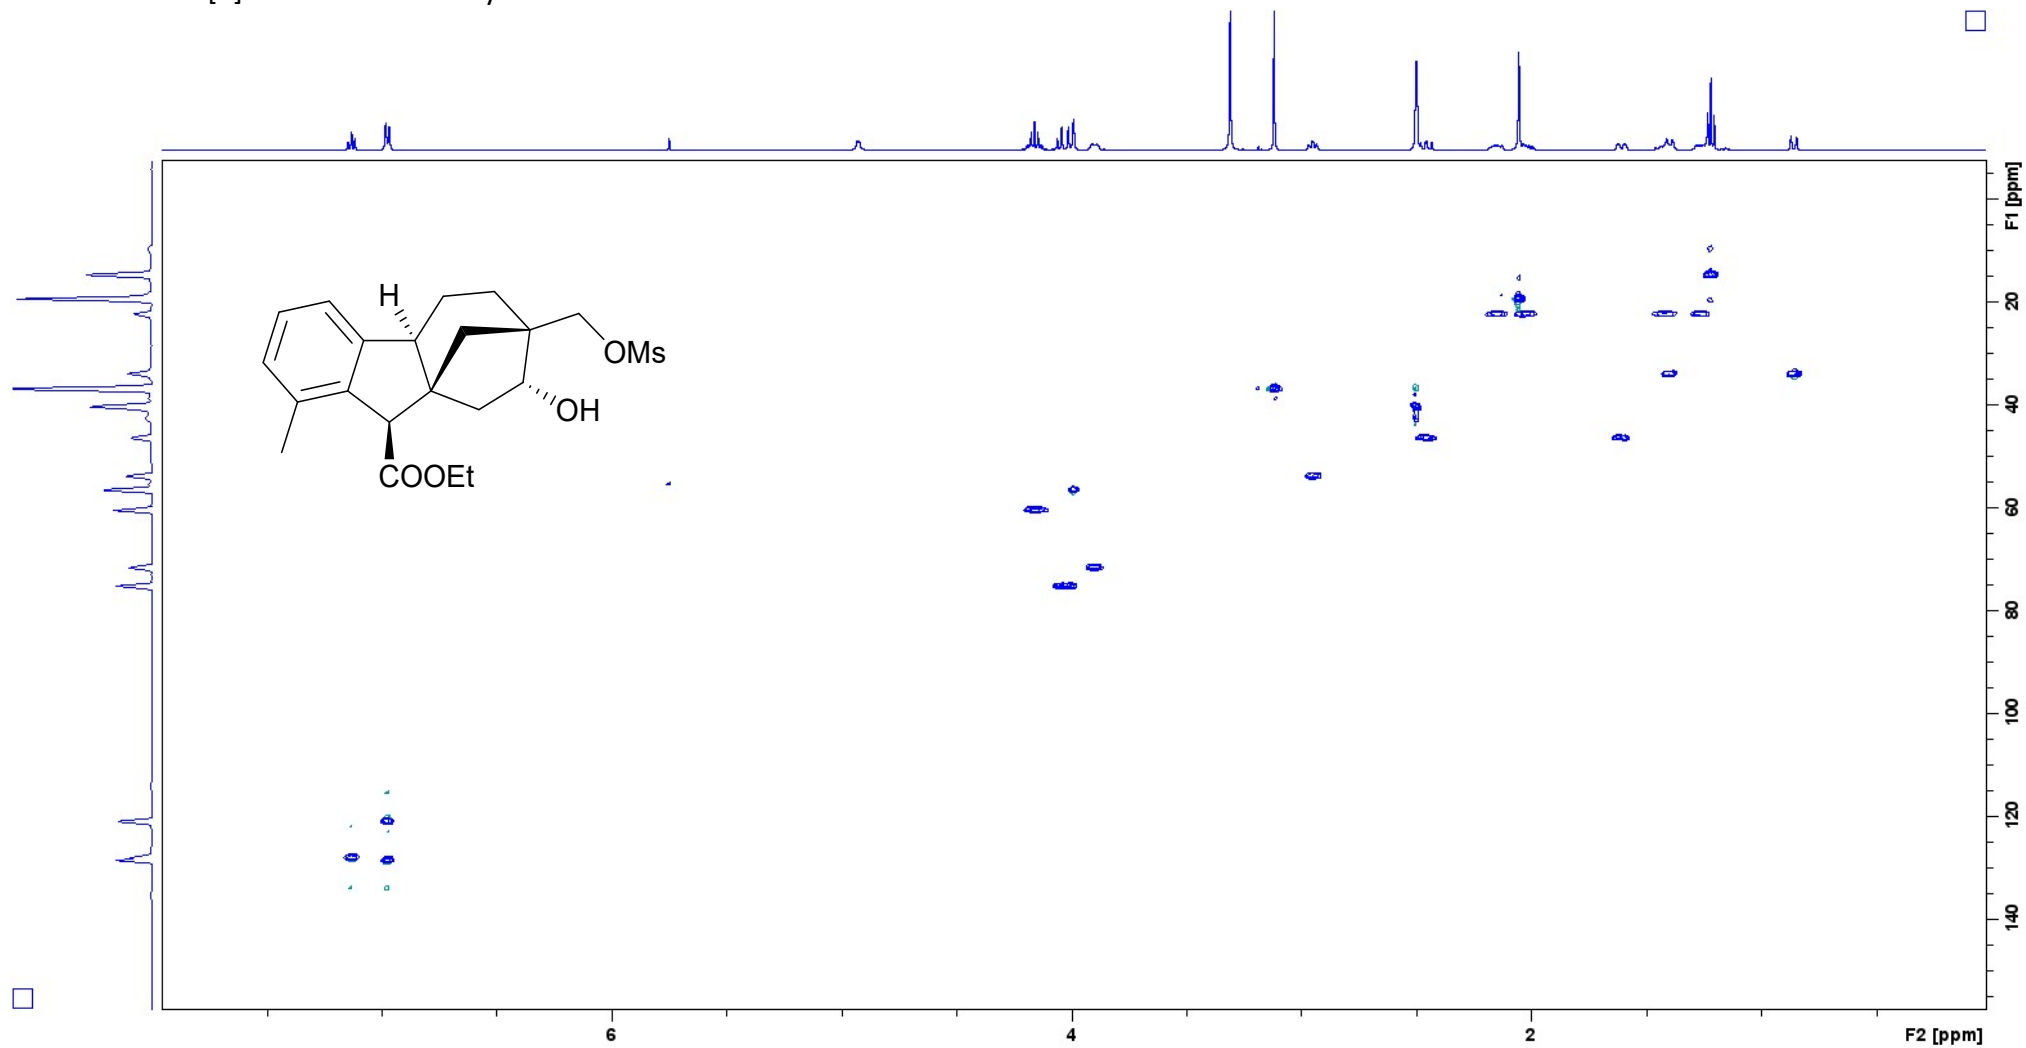

HMBC of ethyl (4*b*S,7*S*,8*R*,9*a*S,10*R*)-8-hydroxy-1-methyl-7-(((methylsulfonyl)oxy)methyl)-4*b*,6,7,8,9,10-hexahydro-5*H*-7,9a-methanobenzo[*a*]azulene-10-carboxylate **23**

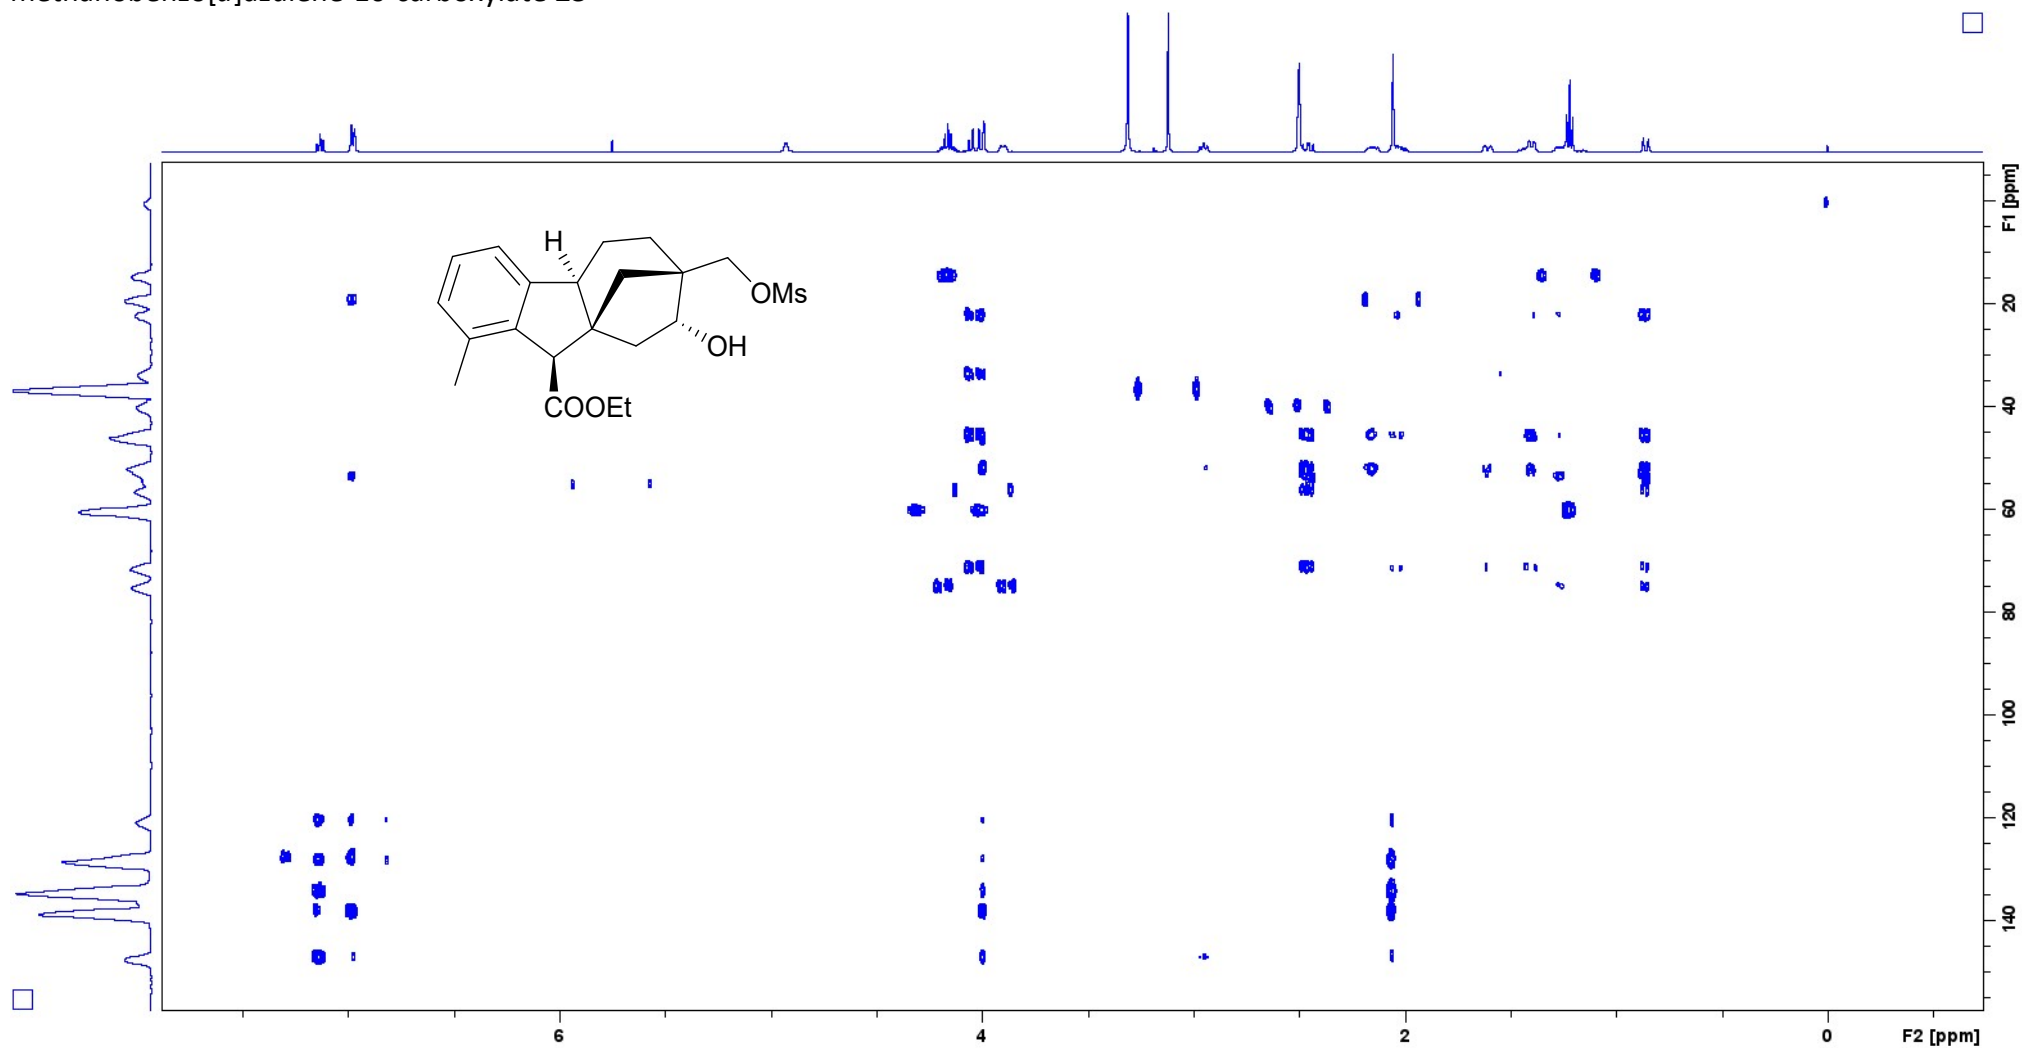

<sup>1</sup>H-NMR of ethyl (4*S*,7*S*,8*R*,9*aS*,10*R*)-7-(azidomethyl)-8-hydroxy-1-methyl-4*b*,6,7,8,9,10-hexahydro-5*H*-7,9*a*-methanobenzo[*a*]azulene-10-carboxylate **24**

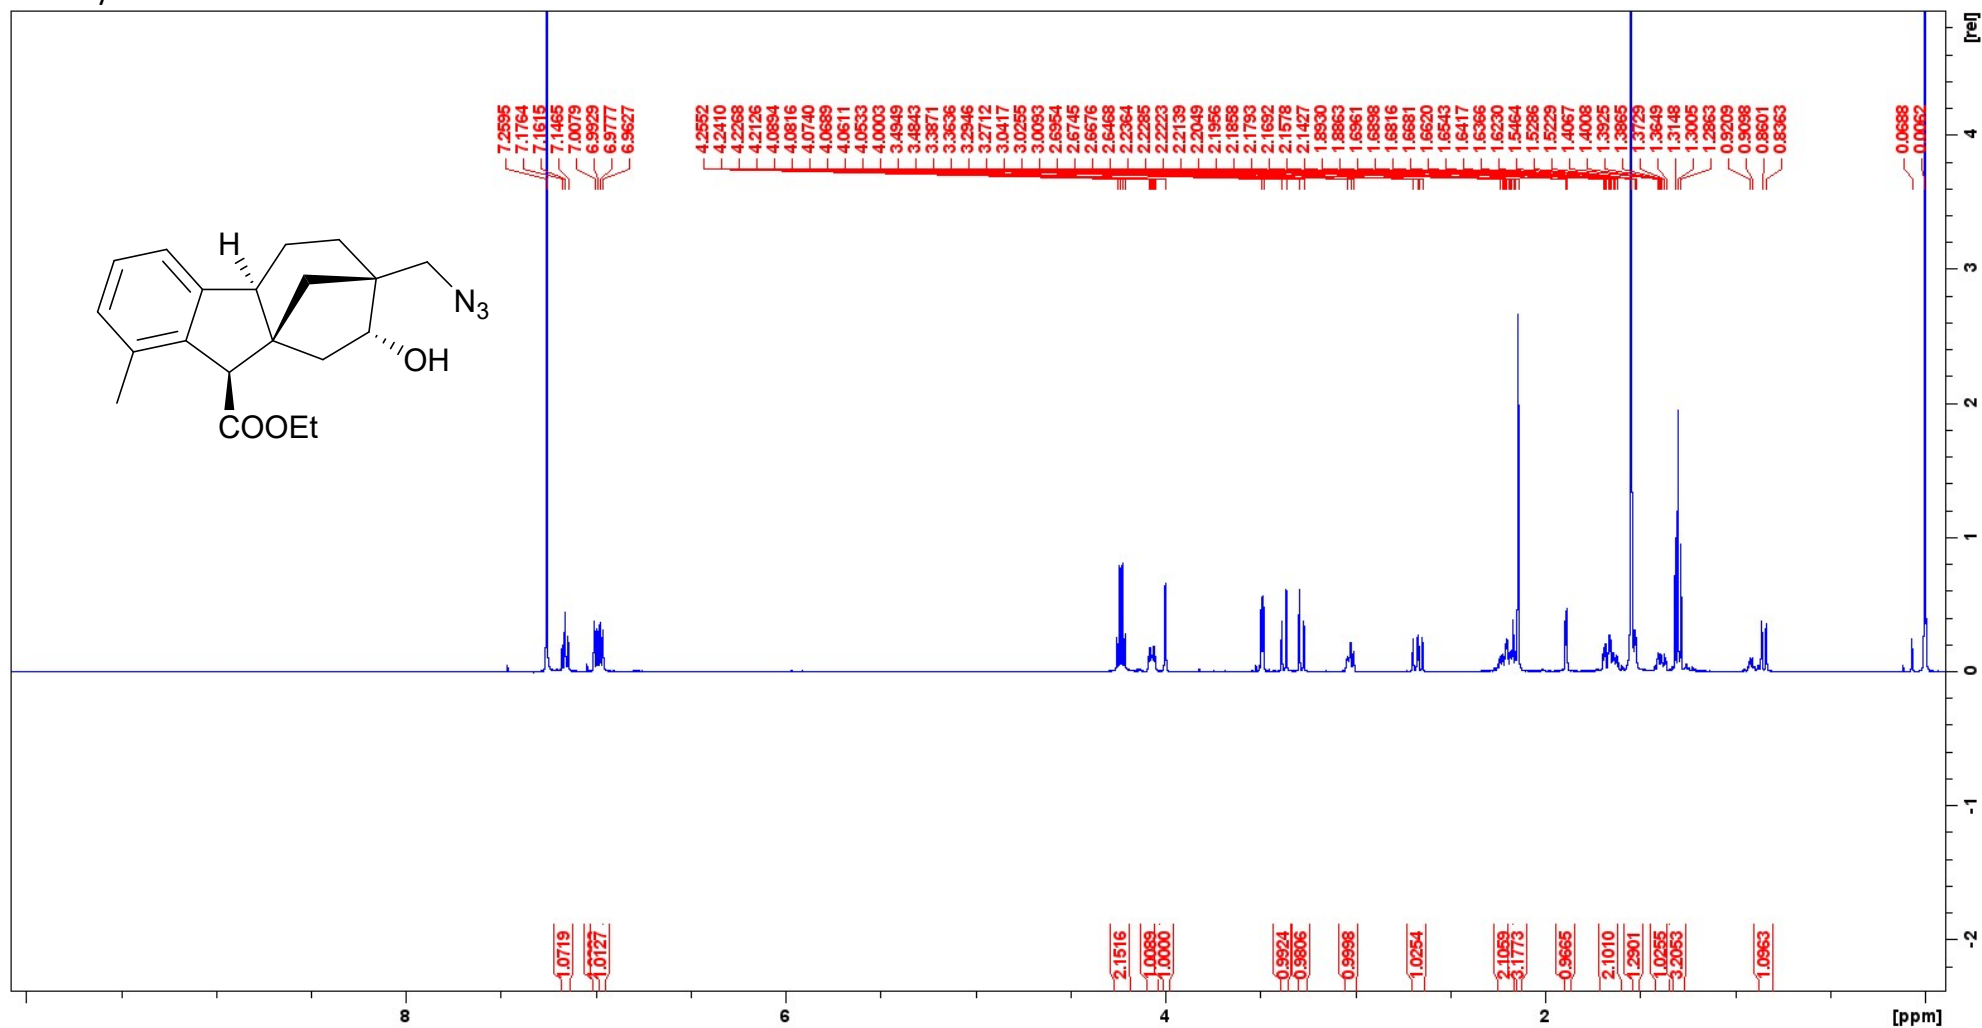

<sup>13</sup>C-NMR of ethyl (4*S*,7*S*,8*R*,9*aS*,10*R*)-7-(azidomethyl)-8-hydroxy-1-methyl-4*b*,6,7,8,9,10-hexahydro-5*H*-7,9*a*-methanobenzo[*a*]azulene-10-carboxylate **24**

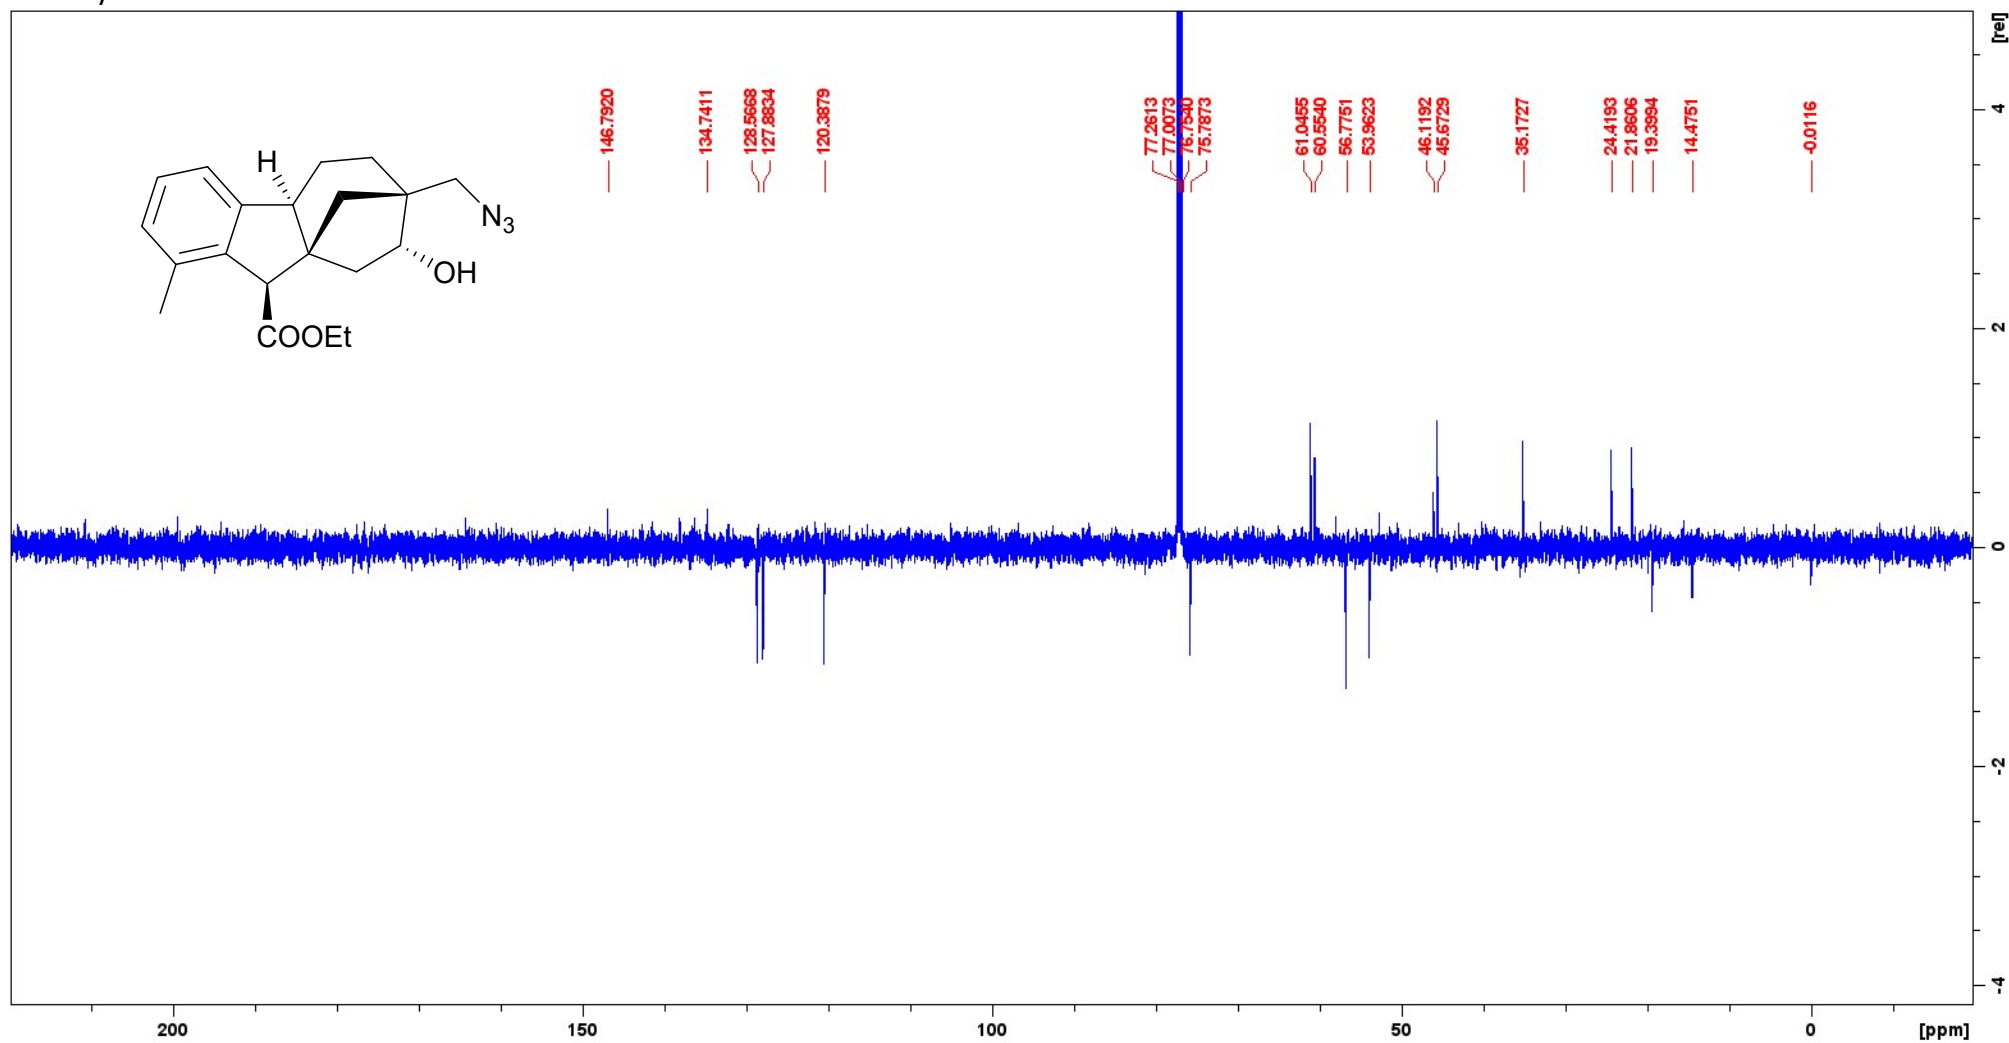

COSY of ethyl (4*S*,7*S*,8*R*,9*aS*,10*R*)-7-(azidomethyl)-8-hydroxy-1-methyl-4*b*,6,7,8,9,10-hexahydro-5*H*-7,9*a*-methanobenzo[*a*]azulene-10-carboxylate **24**

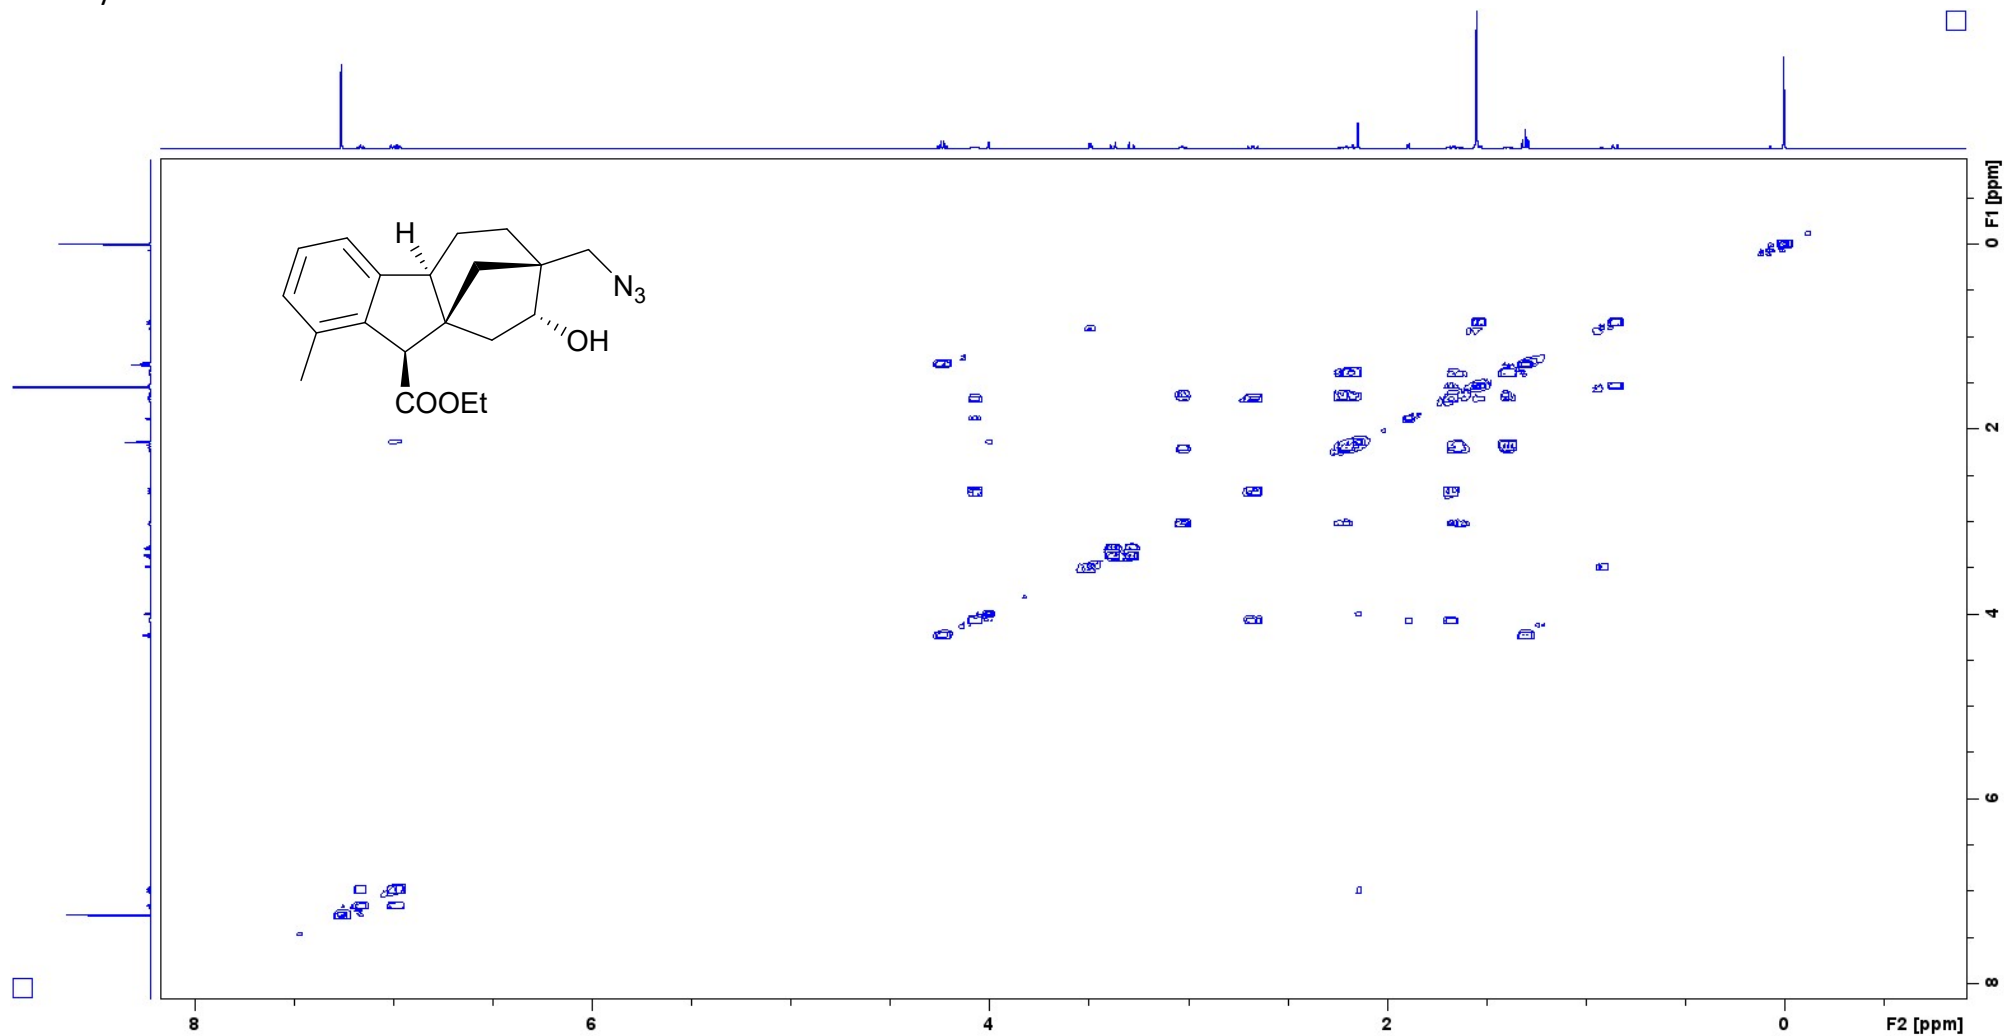

NOESY of ethyl (4*bS*,7*S*,8*R*,9*aS*,10*R*)-7-(azidomethyl)-8-hydroxy-1-methyl-4*b*,6,7,8,9,10-hexahydro-5*H*-7,9*a*-methanobenzo[*a*]azulene-10-carboxylate **24**

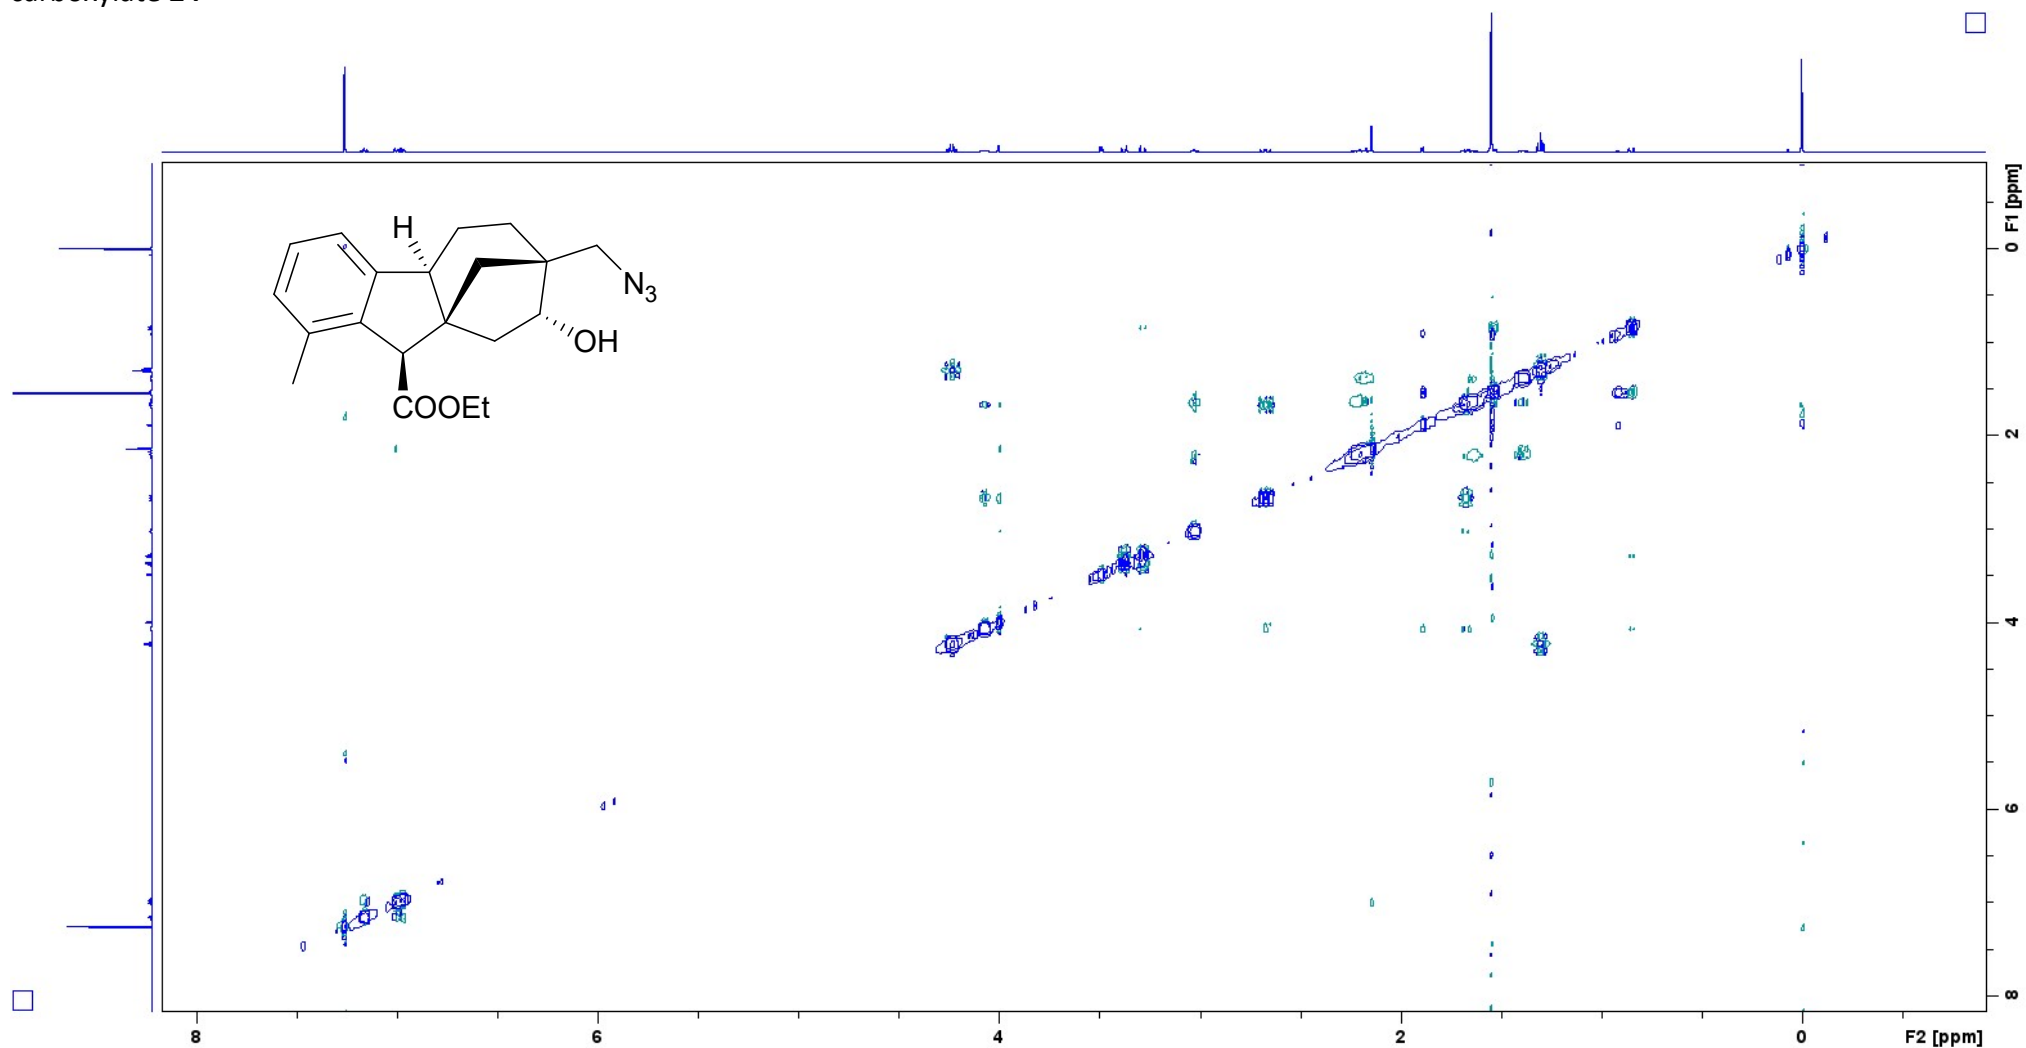

HSQC of ethyl (4*S*,7*S*,8*R*,9*aS*,10*R*)-7-(azidomethyl)-8-hydroxy-1-methyl-4*b*,6,7,8,9,10-hexahydro-5*H*-7,9*a*-methanobenzo[*a*]azulene-10-carboxylate **24**

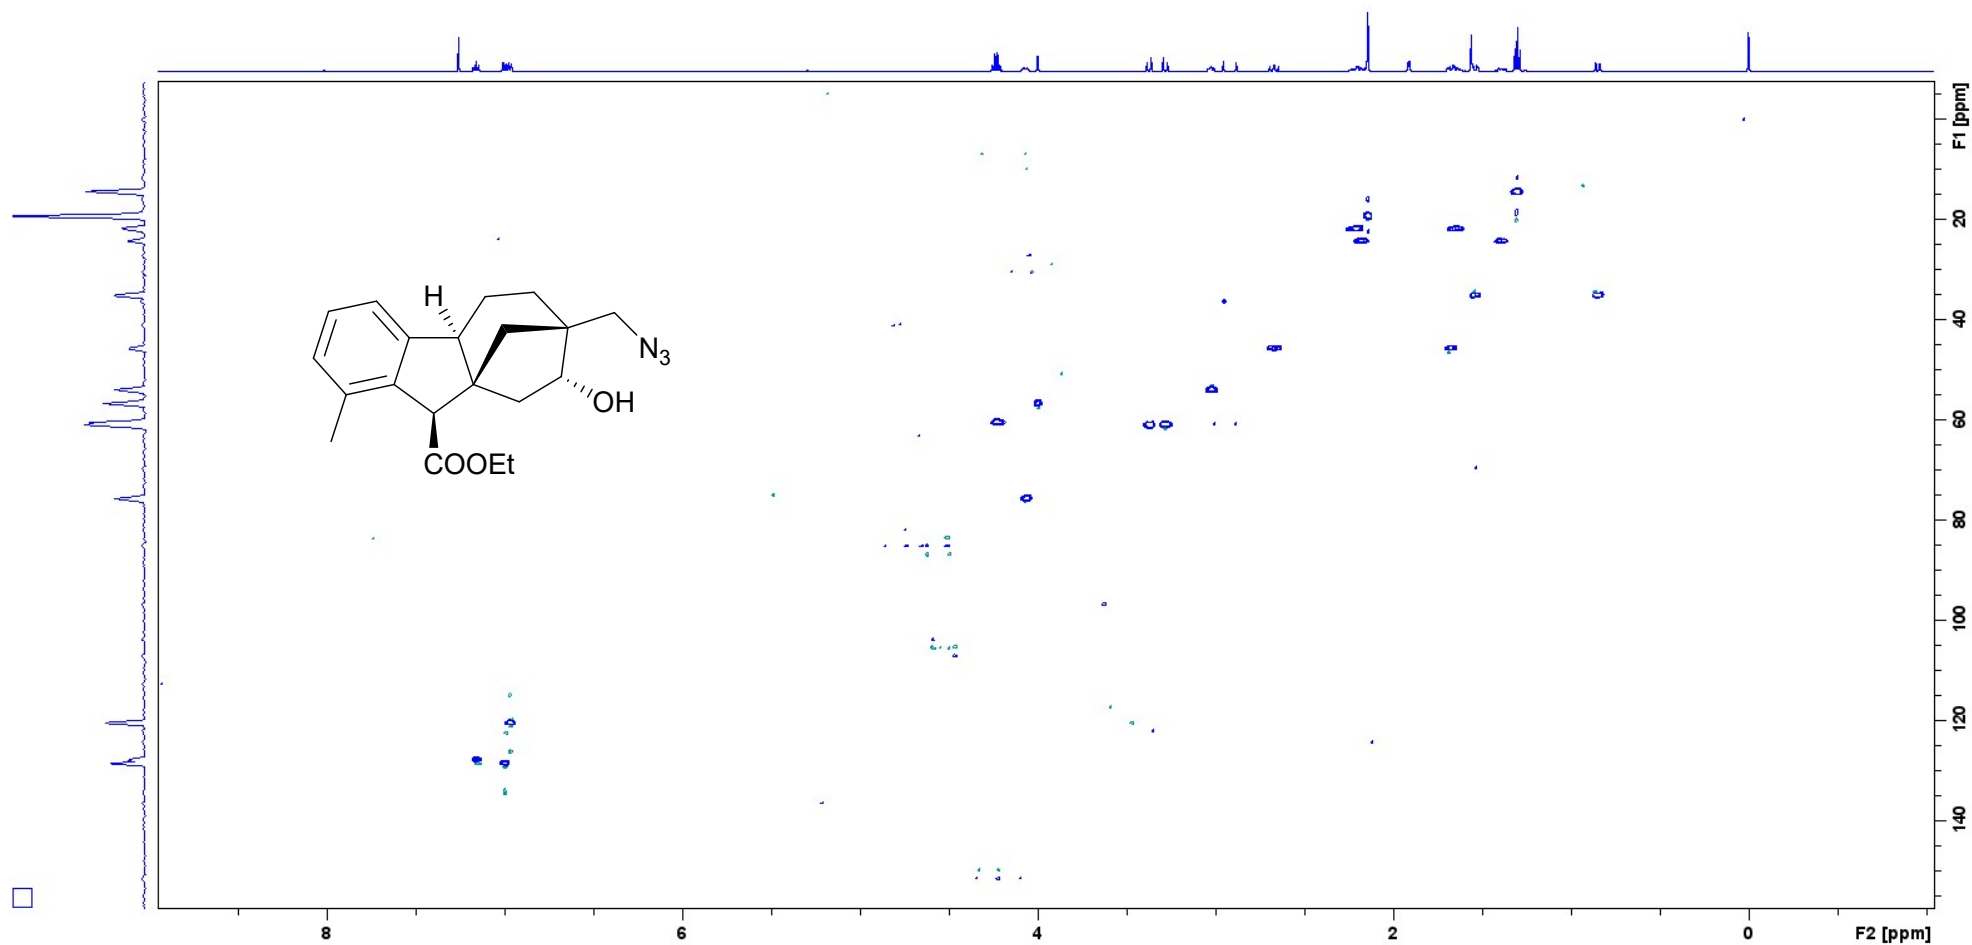

HMBC of ethyl (4*bS*,7*S*,8*R*,9*aS*,10*R*)-7-(azidomethyl)-8-hydroxy-1-methyl-4*b*,6,7,8,9,10-hexahydro-5*H*-7,9*a*-methanobenzo[*a*]azulene-10-carboxylate **24**

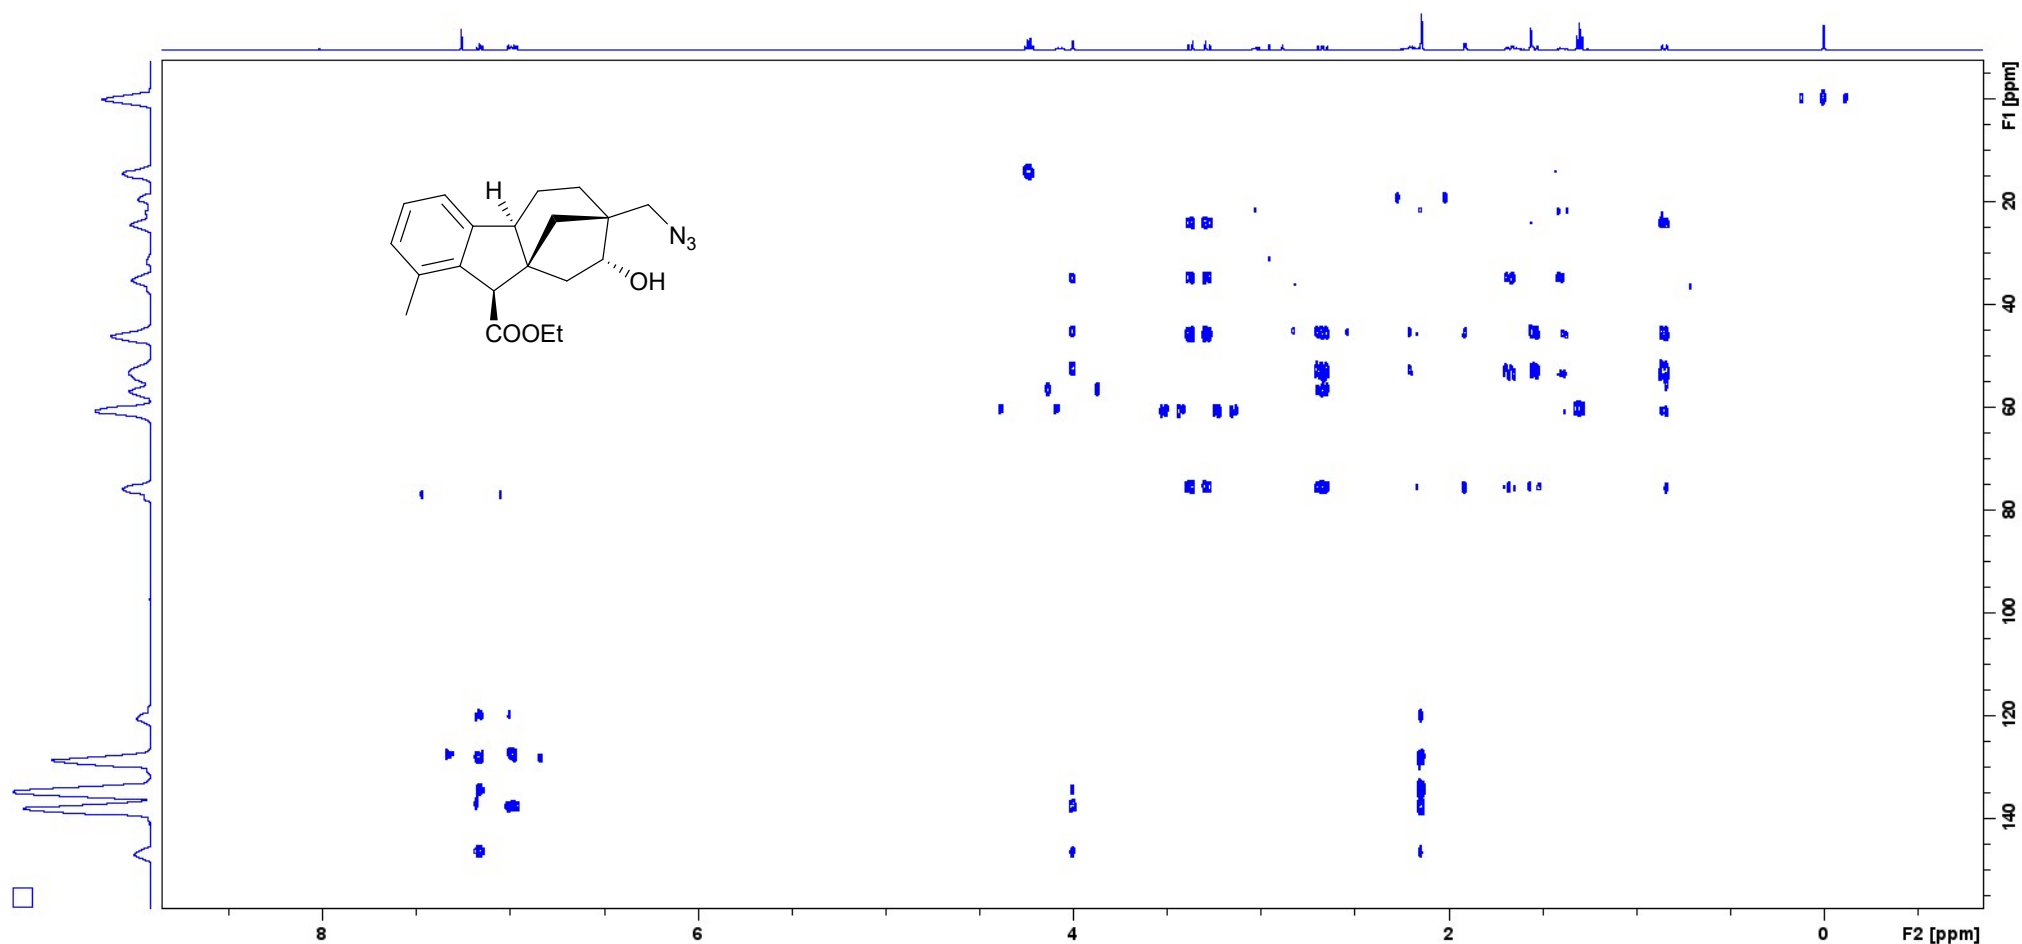



<sup>1</sup>H-NMR of ethyl (4b*S*,7*S*,8*R*,9*aS*,10*R*)-7-(aminomethyl)-8-hydroxy-1-methyl-4b,6,7,8,9,10-hexahydro-5H-7,9a-methanobenzo[*a*]azulene-10-carboxylate **25**

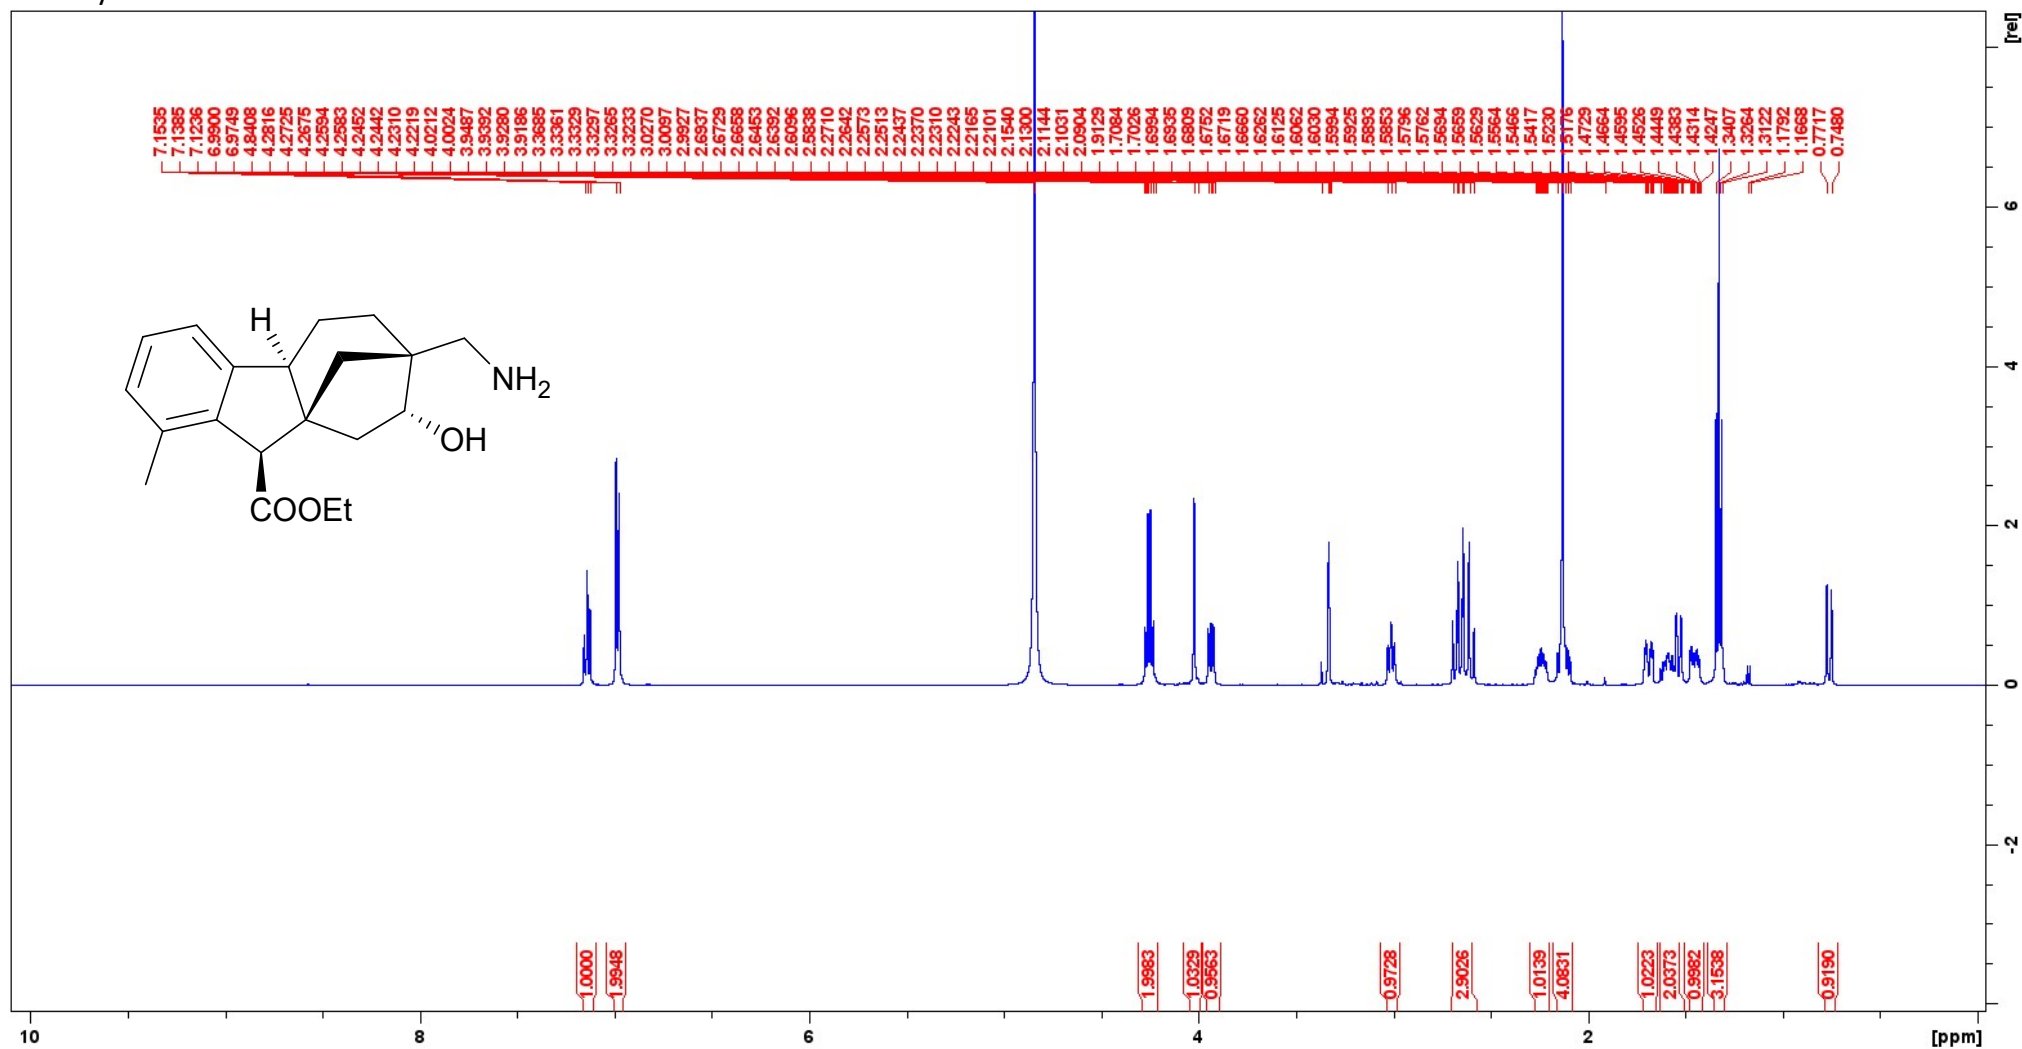

<sup>13</sup>C-NMR of ethyl (4*bS*,7*S*,8*R*,9*aS*,10*R*)-7-(aminomethyl)-8-hydroxy-1-methyl-4*b*,6,7,8,9,10-hexahydro-5*H*-7,9*a*-methanobenzo[*a*]azulene-10-carboxylate **25**

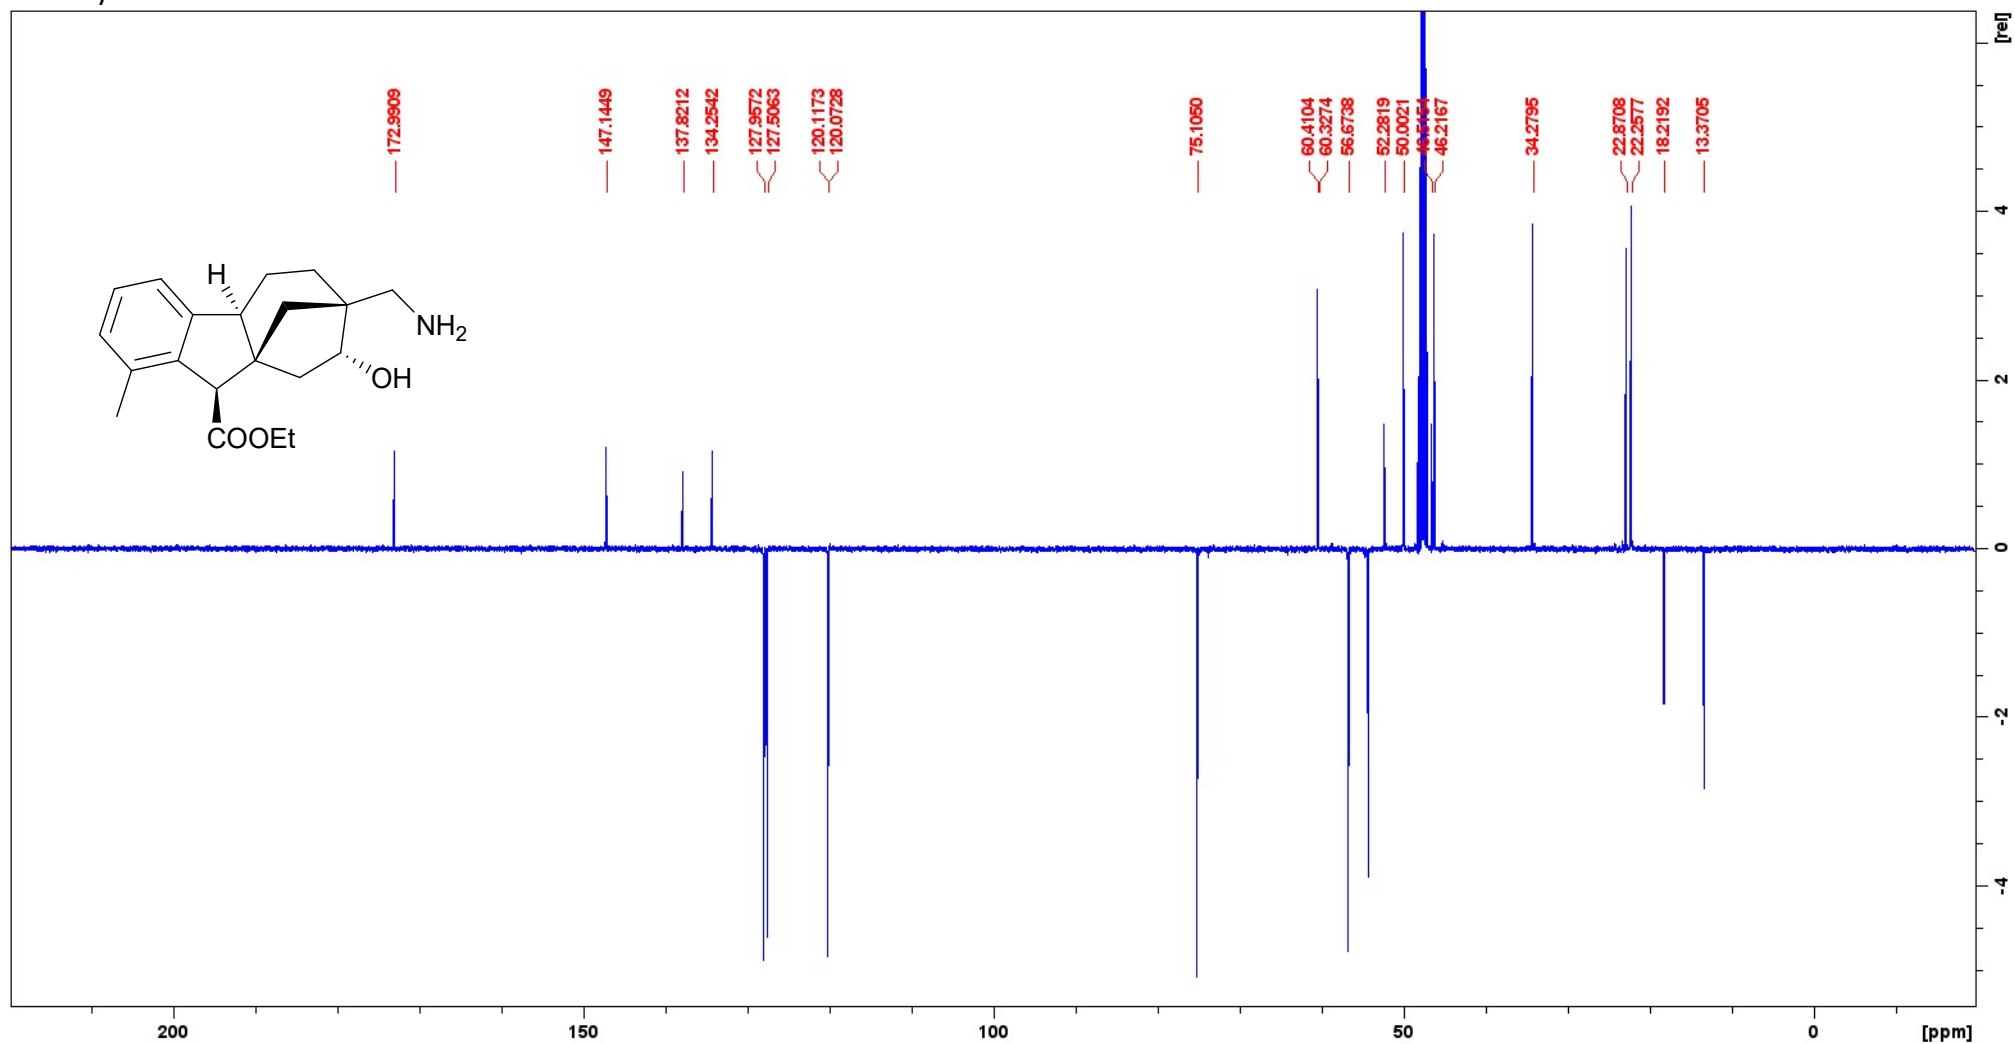

HSQC of ethyl (4*bS*,7*S*,8*R*,9*aS*,10*R*)-7-(aminomethyl)-8-hydroxy-1-methyl-4*b*,6,7,8,9,10-hexahydro-5*H*-7,9*a*-methanobenzo[*a*]azulene-10-carboxylate **25**

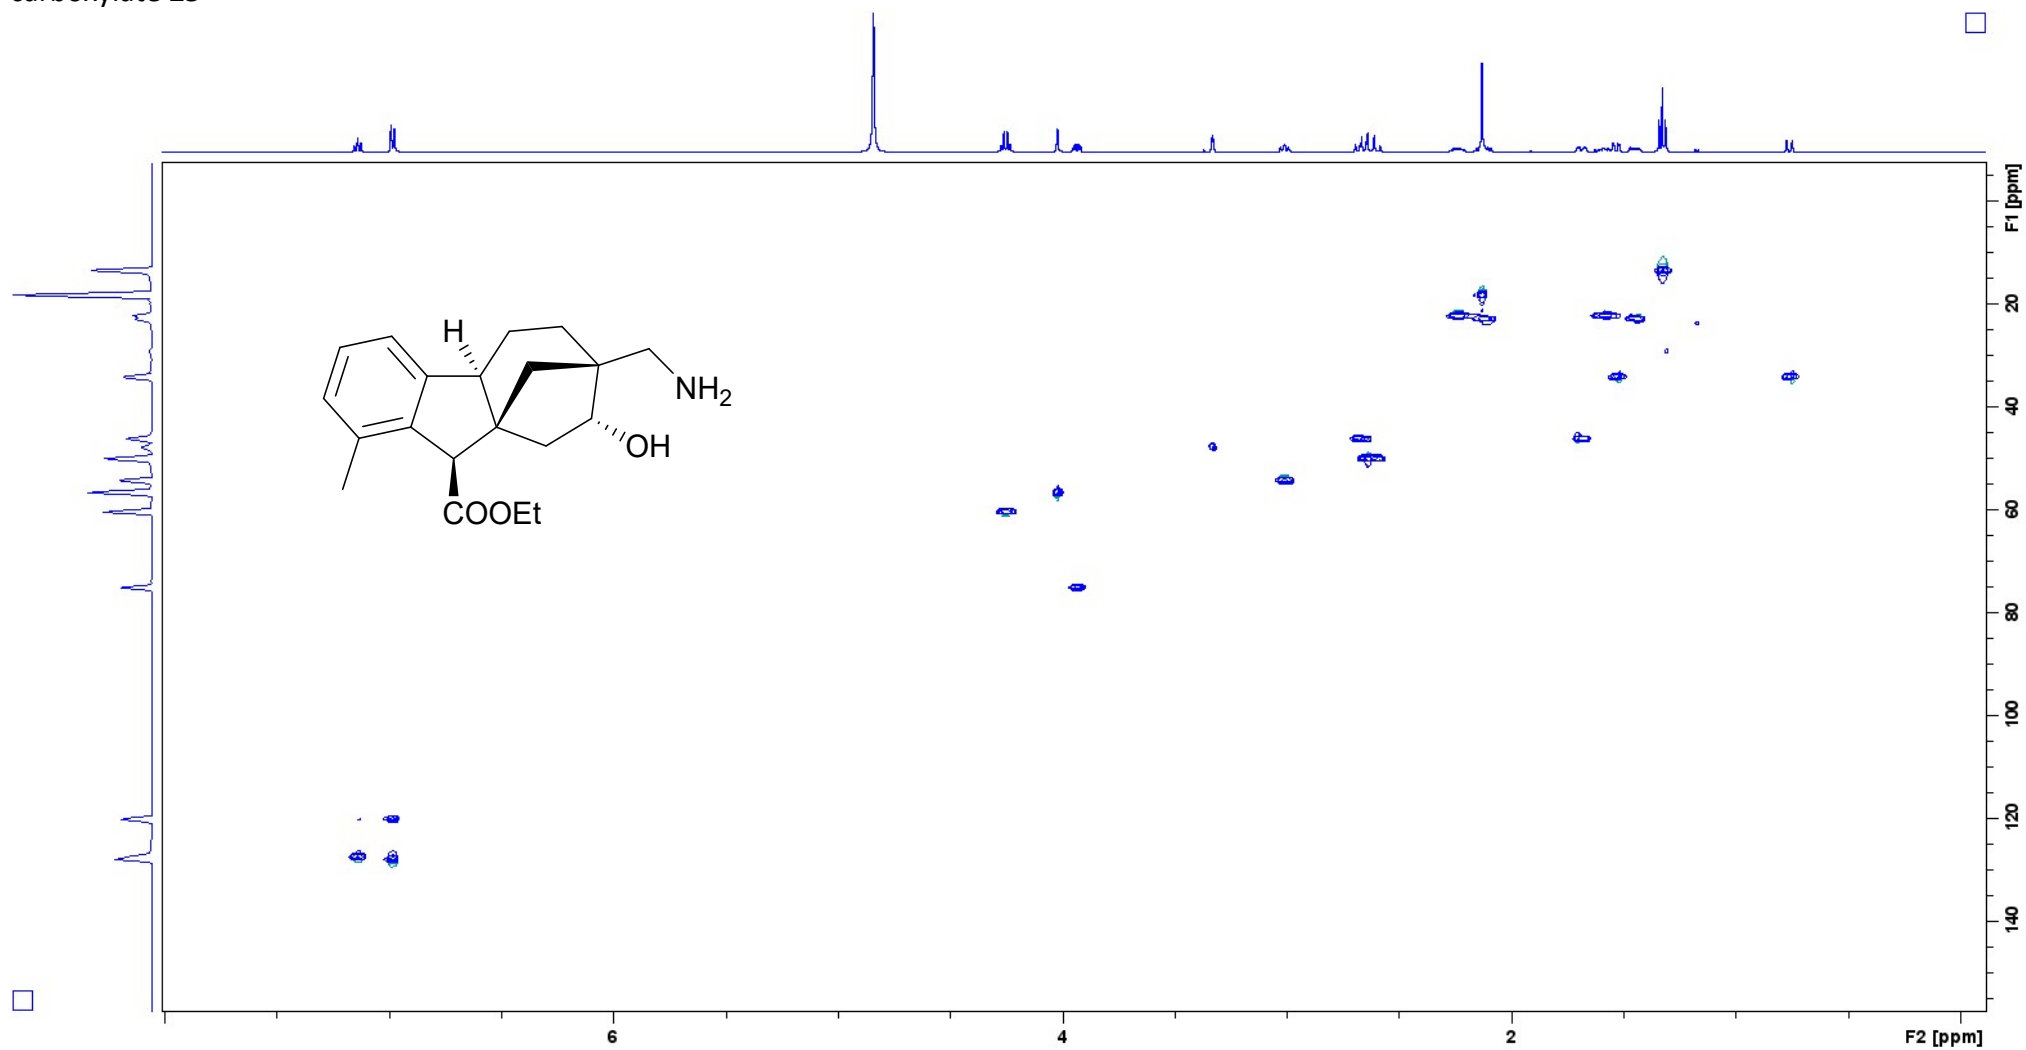

<sup>1</sup>H-NMR of ethyl (4*bS*,7*R*,8*S*,9*aS*,10*R*)-8-(benzylamino)-7-(hydroxymethyl)-1-methyl-4*b*,6,7,8,9,10-hexahydro-5*H*-7,9*a*-methanobenzo[*a*]azulene-10-carboxylate **8**

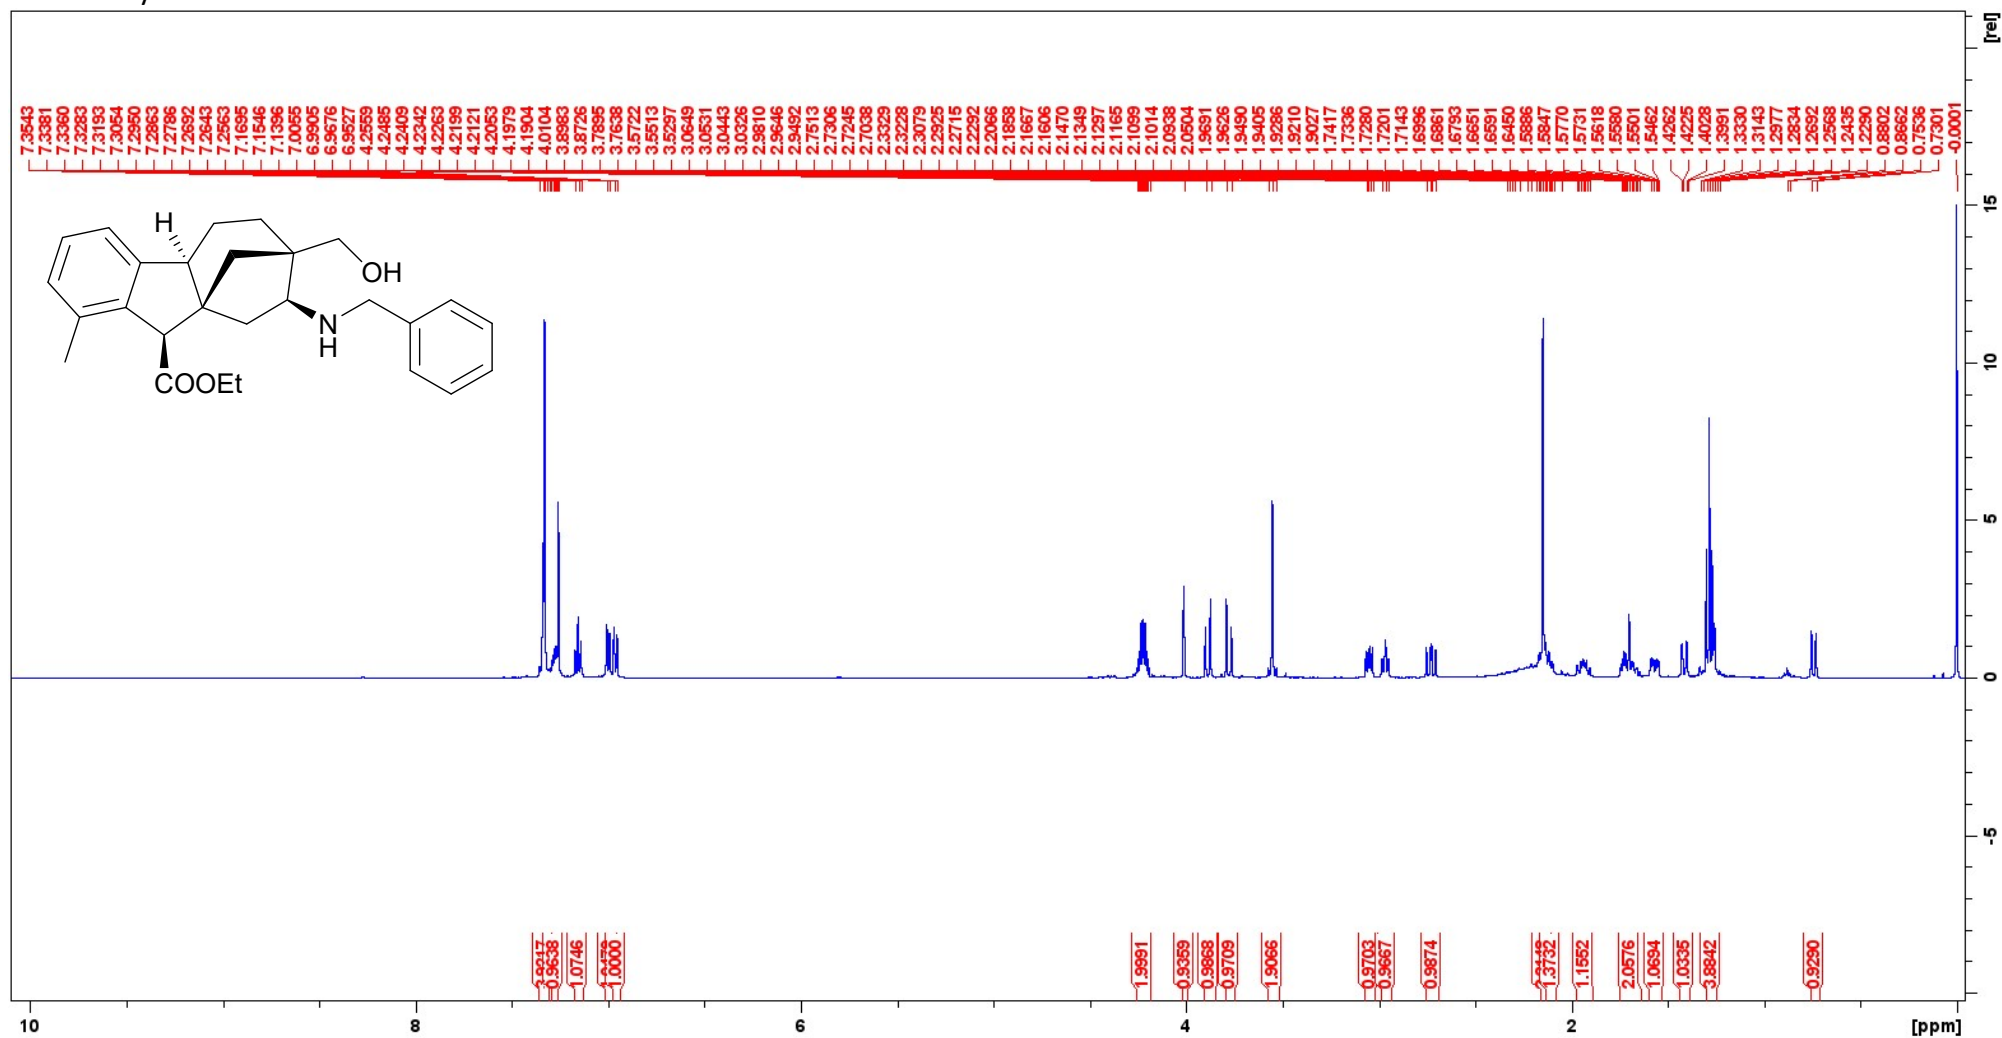

<sup>13</sup>C-NMR of ethyl (4*bS*,7*R*,8*S*,9*aS*,10*R*)-8-(benzylamino)-7-(hydroxymethyl)-1-methyl-4*b*,6,7,8,9,10-hexahydro-5*H*-7,9*a*-methanobenzo[*a*]azulene-10-carboxylate **8**

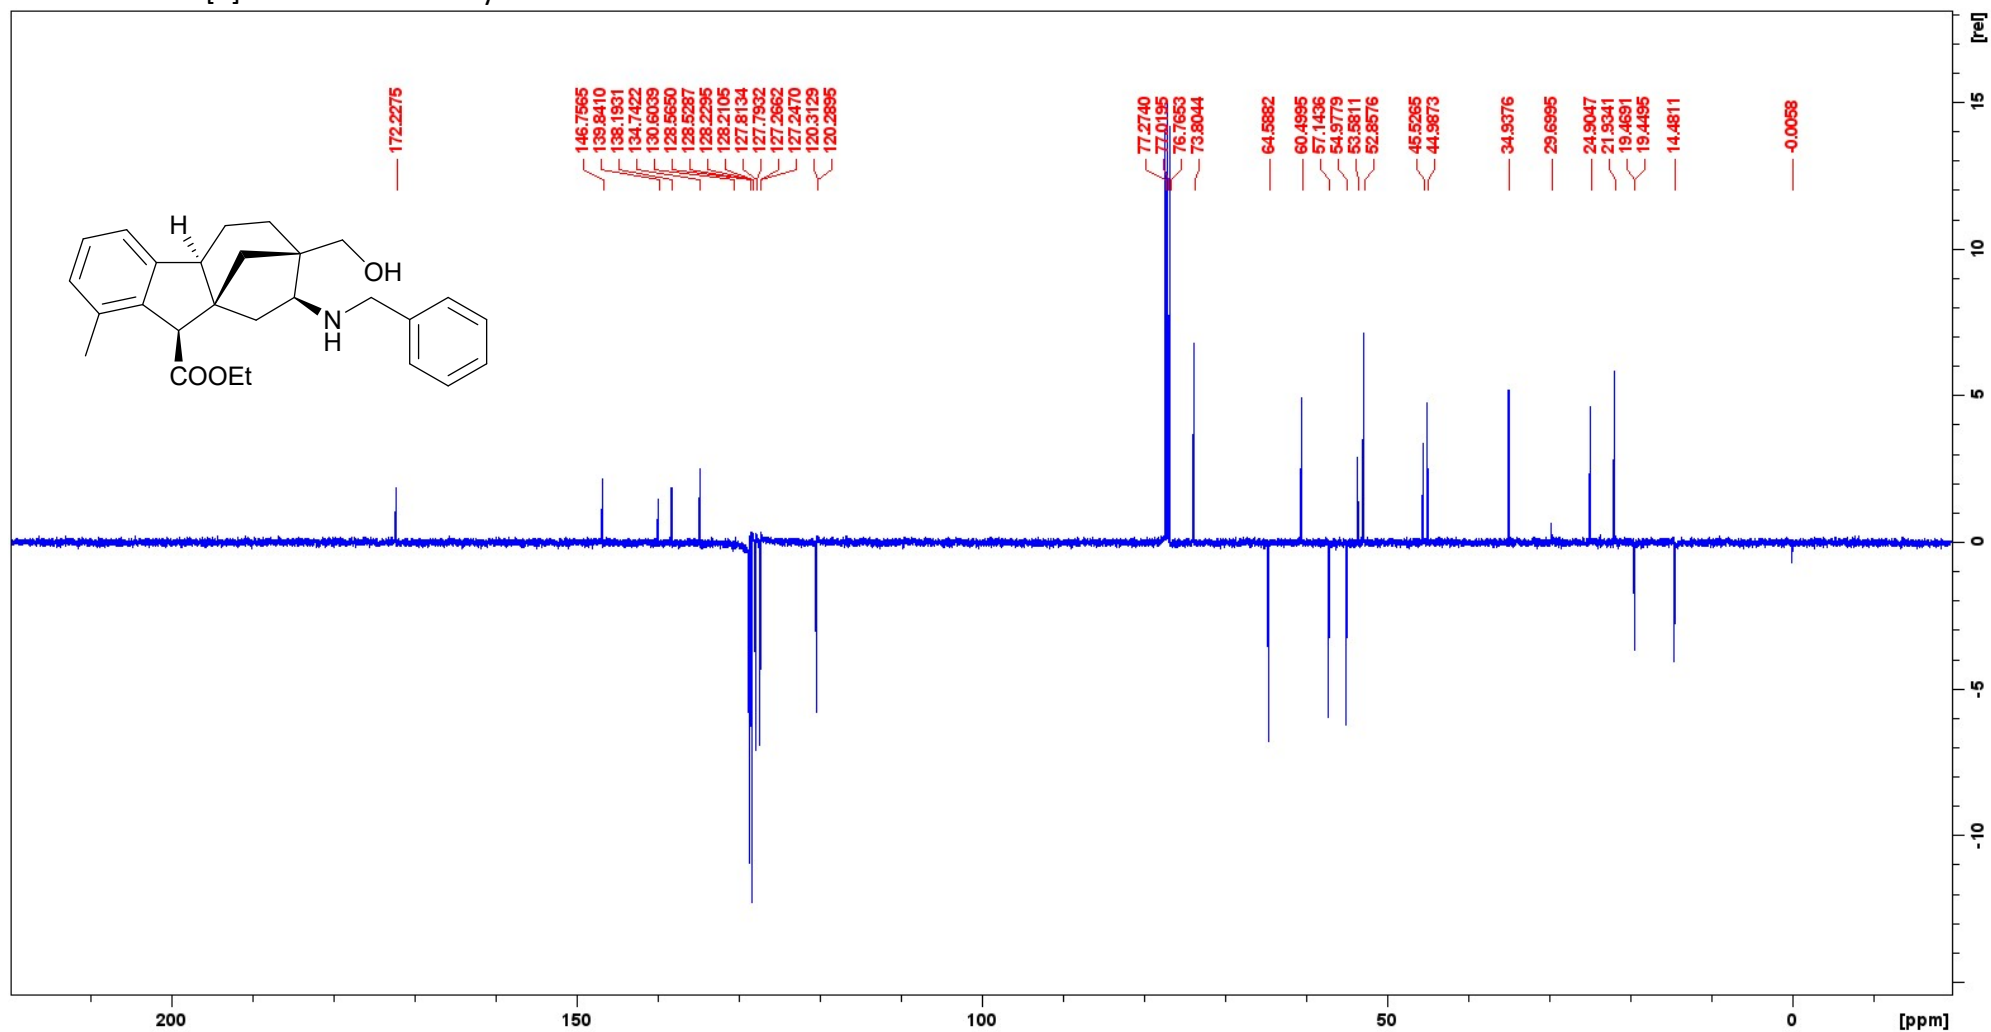

COSY of ethyl (4*S*,7*R*,8*S*,9*aS*,10*R*)-8-(benzylamino)-7-(hydroxymethyl)-1-methyl-4*b*,6,7,8,9,10-hexahydro-5*H*-7,9*a*-methanobenzo[*a*]azulene-10-carboxylate **8**

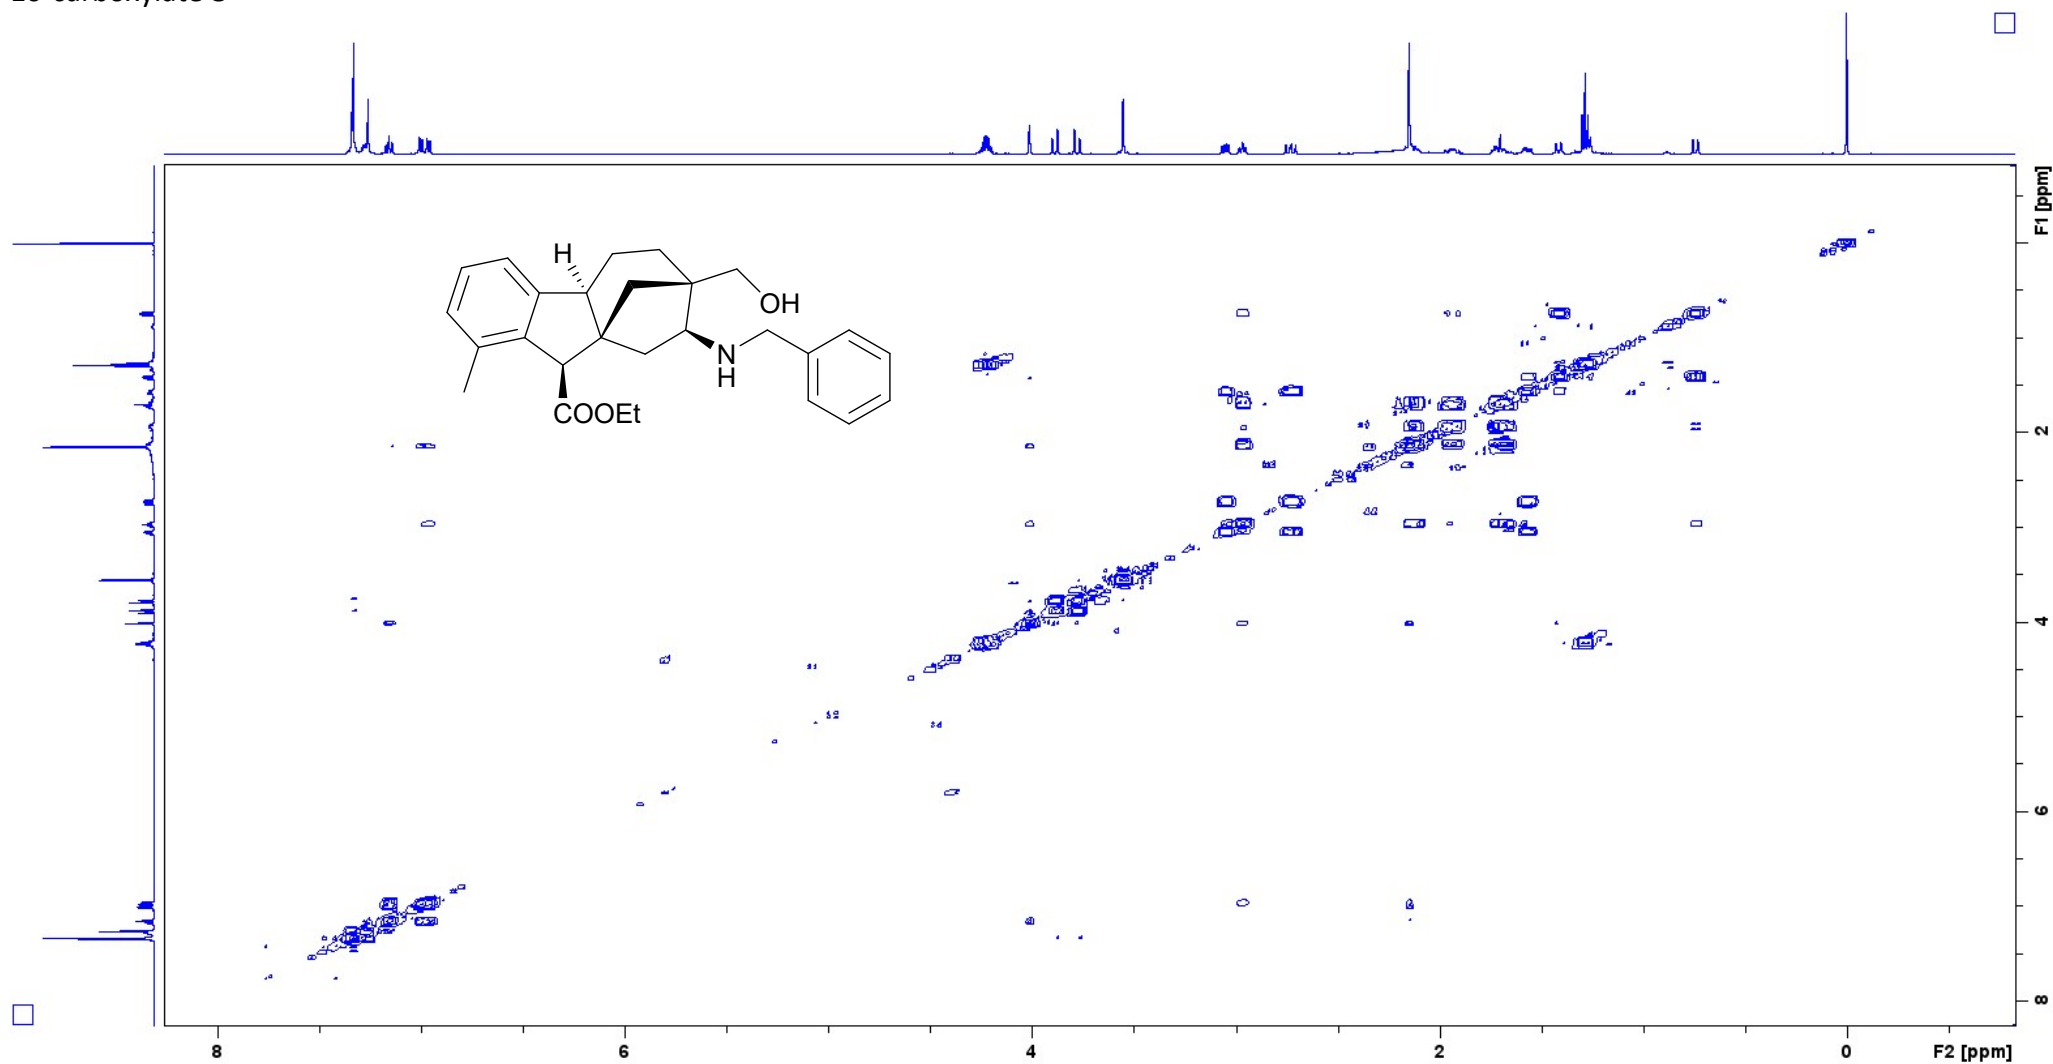

NOESY of ethyl (4*S*,7*R*,8*S*,9*aS*,10*R*)-8-(benzylamino)-7-(hydroxymethyl)-1-methyl-4*b*,6,7,8,9,10-hexahydro-5*H*-7,9*a*-methanobenzo[*a*]azulene-10-carboxylate **8**

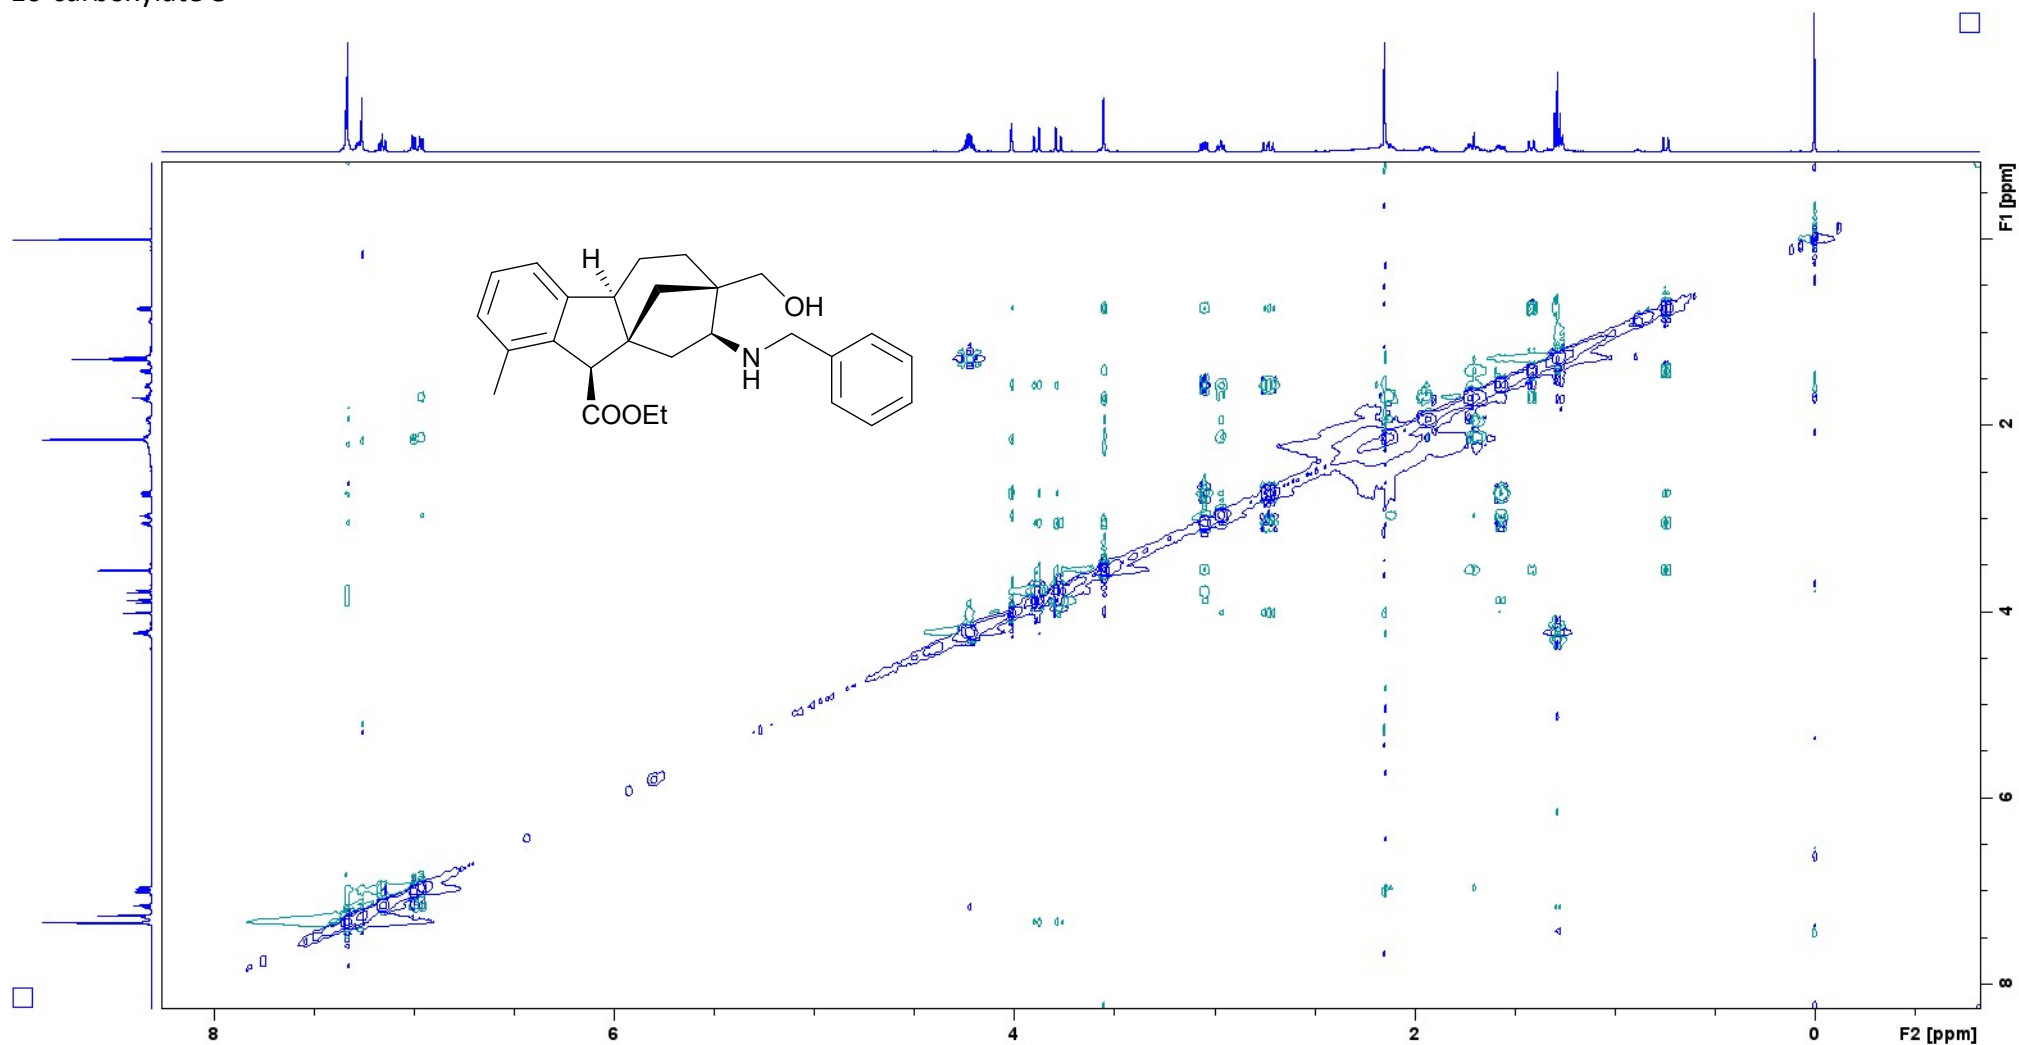

HSQC of ethyl (4*S*,7*R*,8*S*,9*aS*,10*R*)-8-(benzylamino)-7-(hydroxymethyl)-1-methyl-4*b*,6,7,8,9,10-hexahydro-5*H*-7,9*a*-methanobenzo[*a*]azulene-10-carboxylate **8**

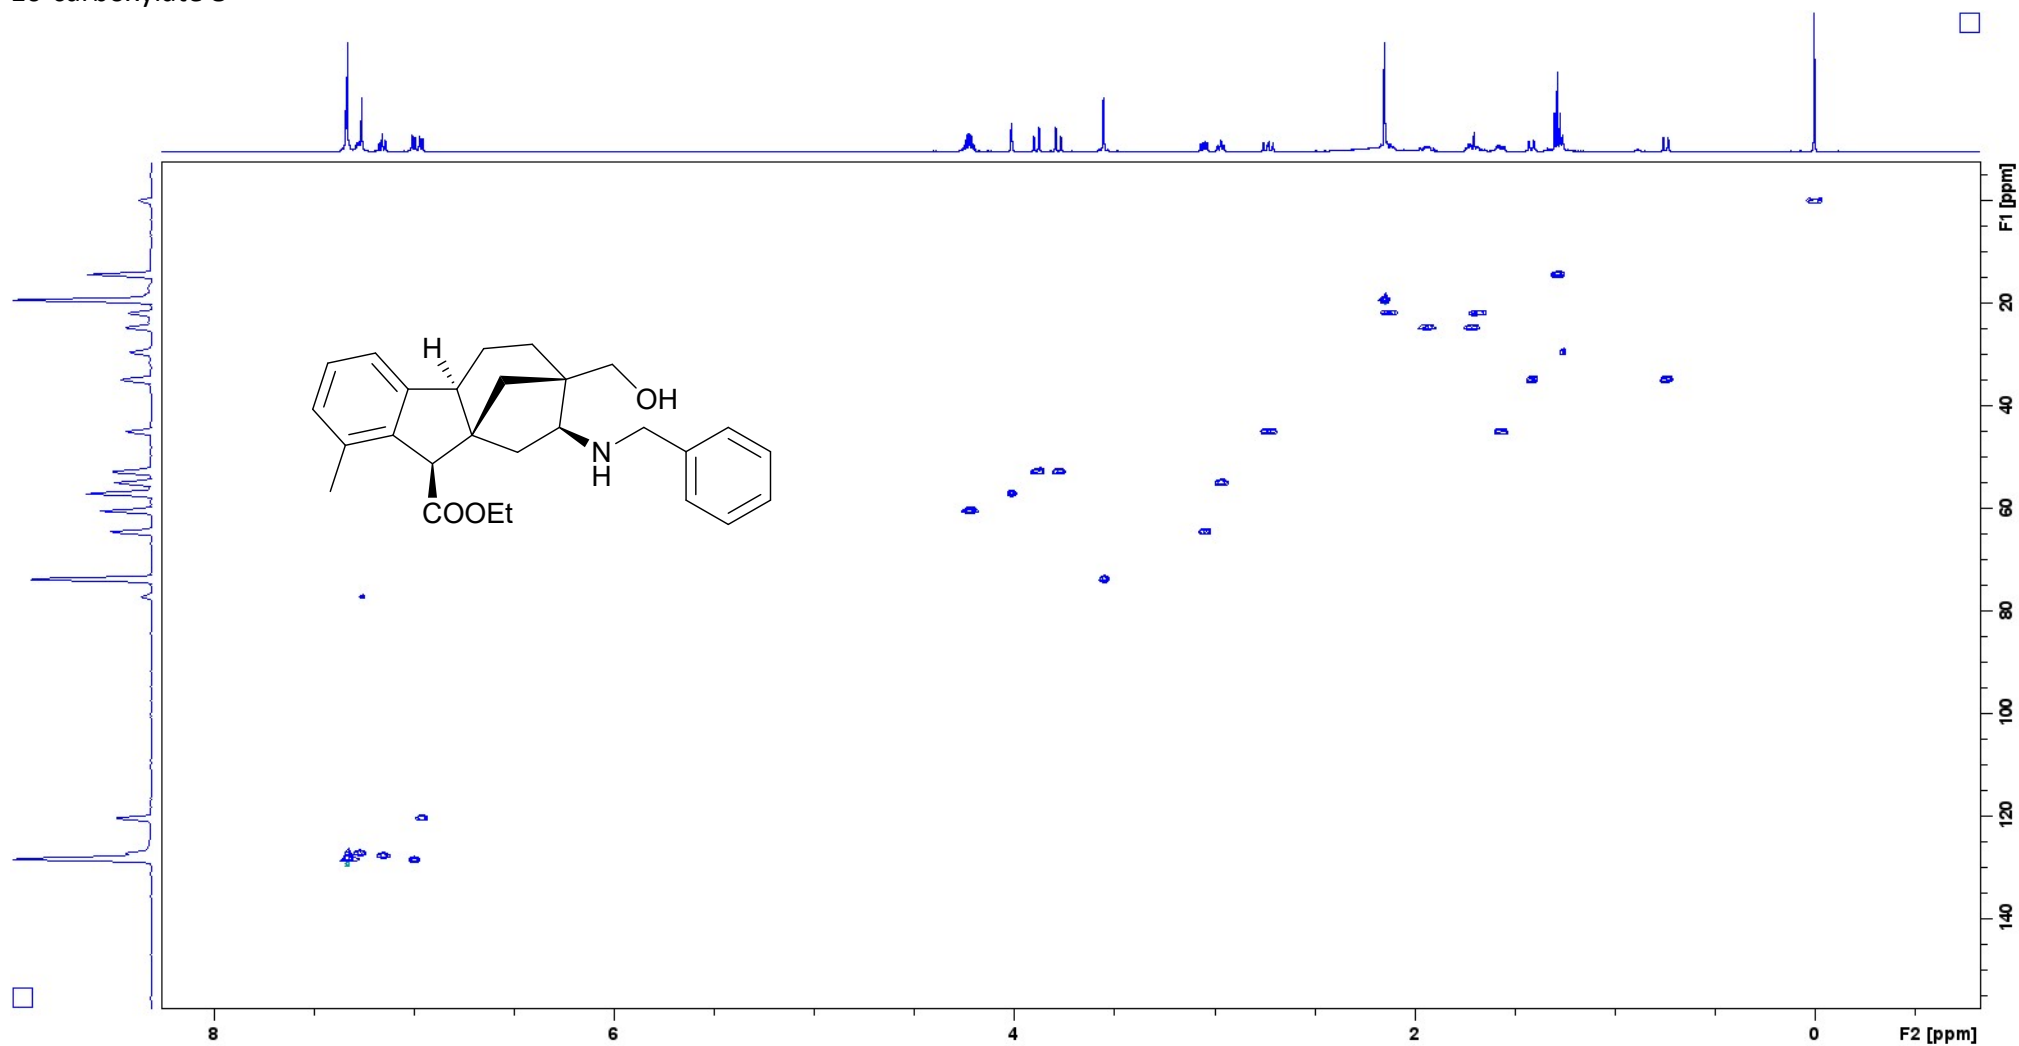



HMBC of ethyl (4*S*,7*R*,8*S*,9*aS*,10*R*)-8-(benzylamino)-7-(hydroxymethyl)-1-methyl-4*b*,6,7,8,9,10-hexahydro-5*H*-7,9*a*-methanobenzo[*a*]azulene-10-carboxylate **8**

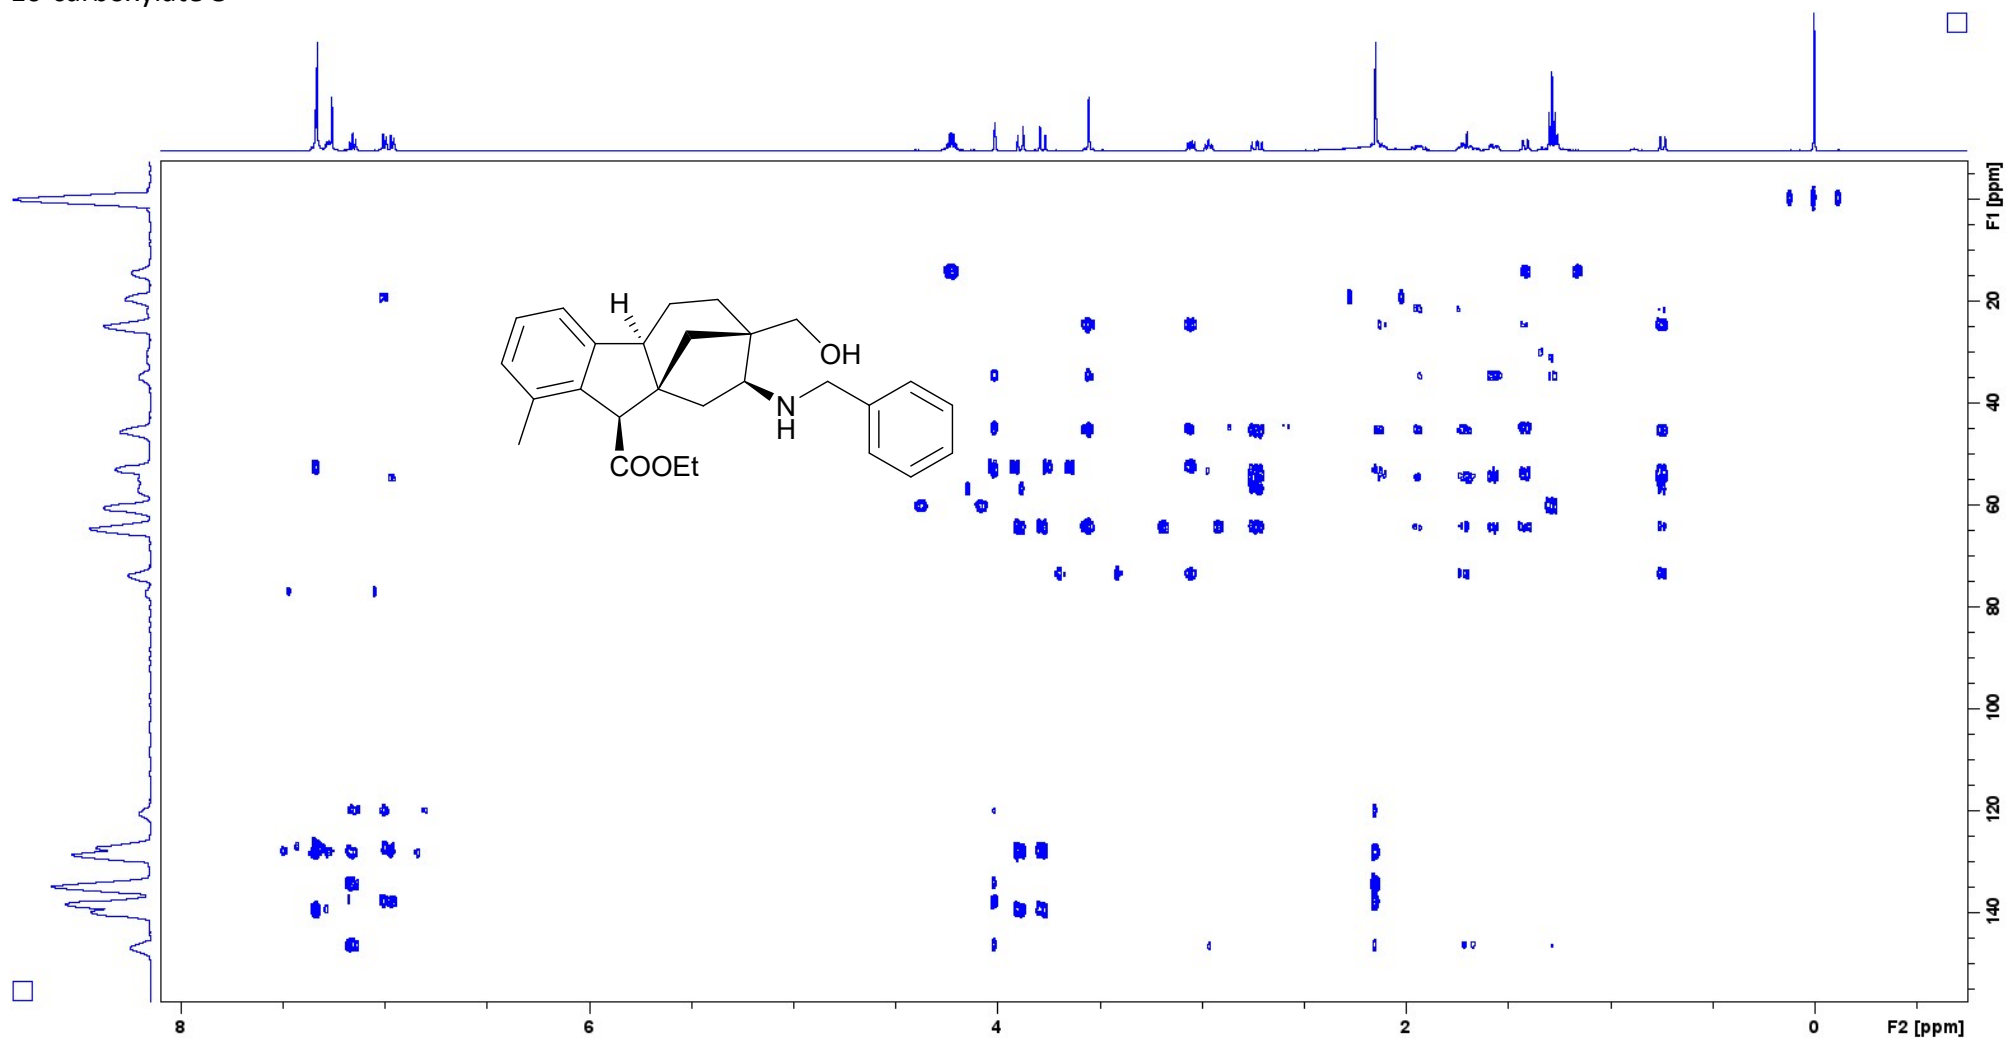

<sup>1</sup>H-NMR of ethyl (4*b*S,7*R*,8*S*,9*a*S,10*R*)-7-(hydroxymethyl)-1-methyl-8-((naphthalen-1-ylmethyl)amino)-4*b*,6,7,8,9,10-hexahydro-5*H*-7,9*a*-methanobenzo[*a*]azulene-10-carboxylate **9**

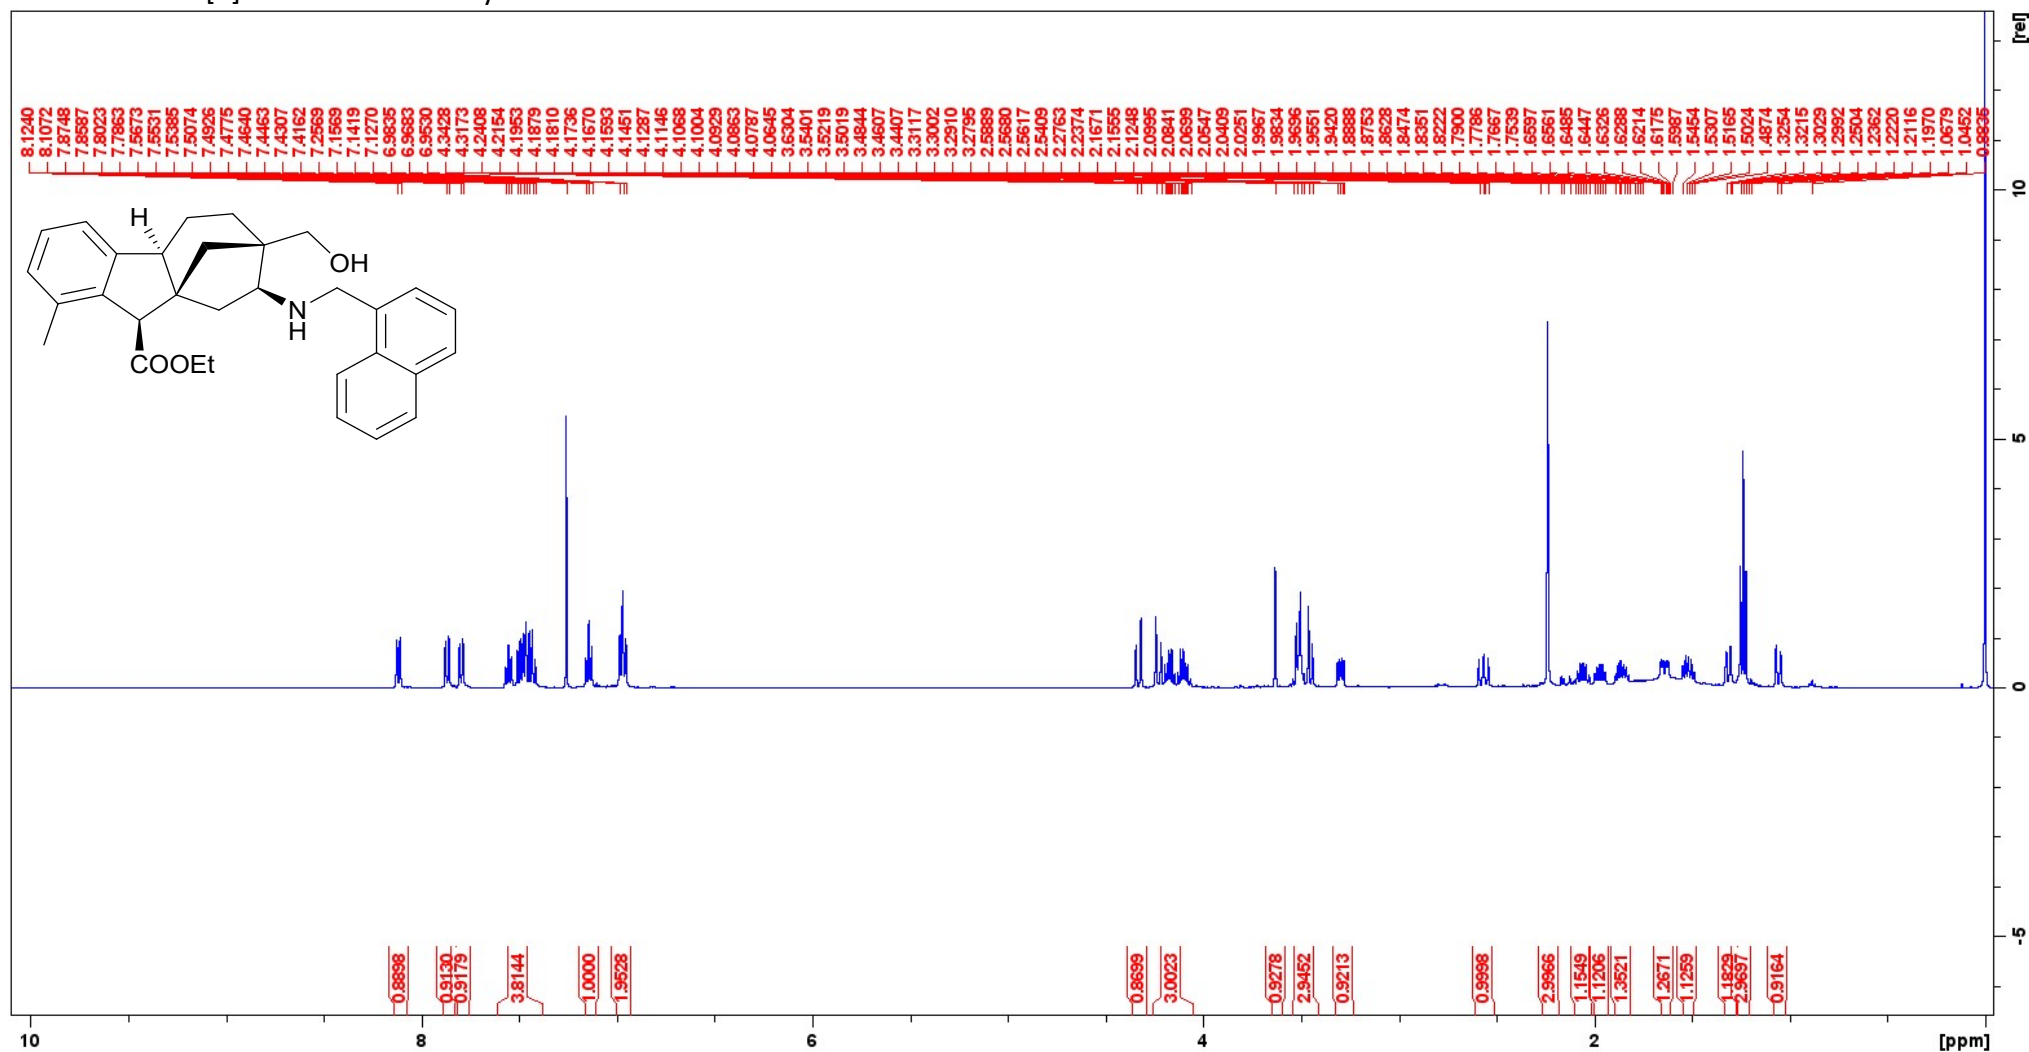

<sup>13</sup>C-NMR of ethyl (4*b**S*,7*R*,8*S*,9*a**S*,10*R*)-7-(hydroxymethyl)-1-methyl-8-((naphthalen-1-ylmethyl)amino)-4*b*,6,7,8,9,10-hexahydro-5*H*-7,9*a*-methanobenzo[*a*]azulene-10-carboxylate **9**

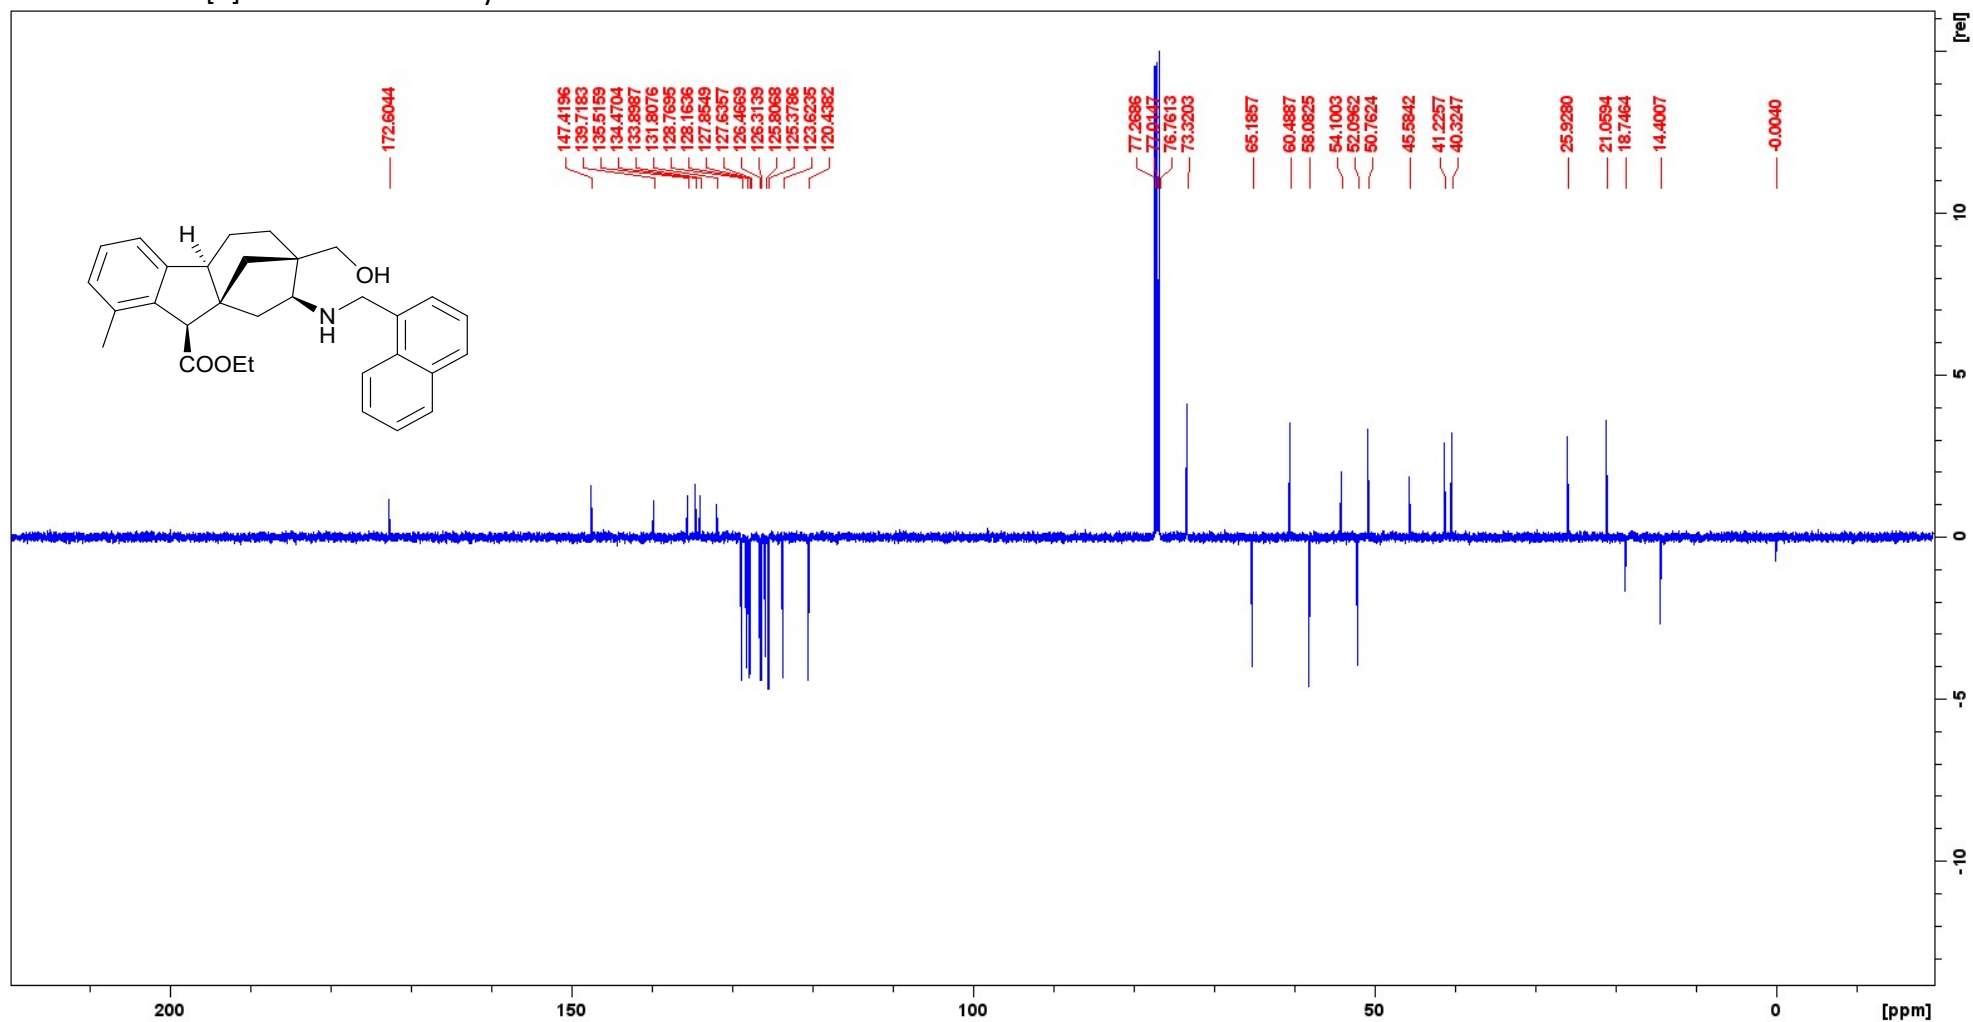

COSY of ethyl (4*b**S*,7*R*,8*S*,9*a**S*,10*R*)-7-(hydroxymethyl)-1-methyl-8-((naphthalen-1-ylmethyl)amino)-4*b*,6,7,8,9,10-hexahydro-5*H*-7,9*a*-methanobenzo[*a*]azulene-10-carboxylate **9**

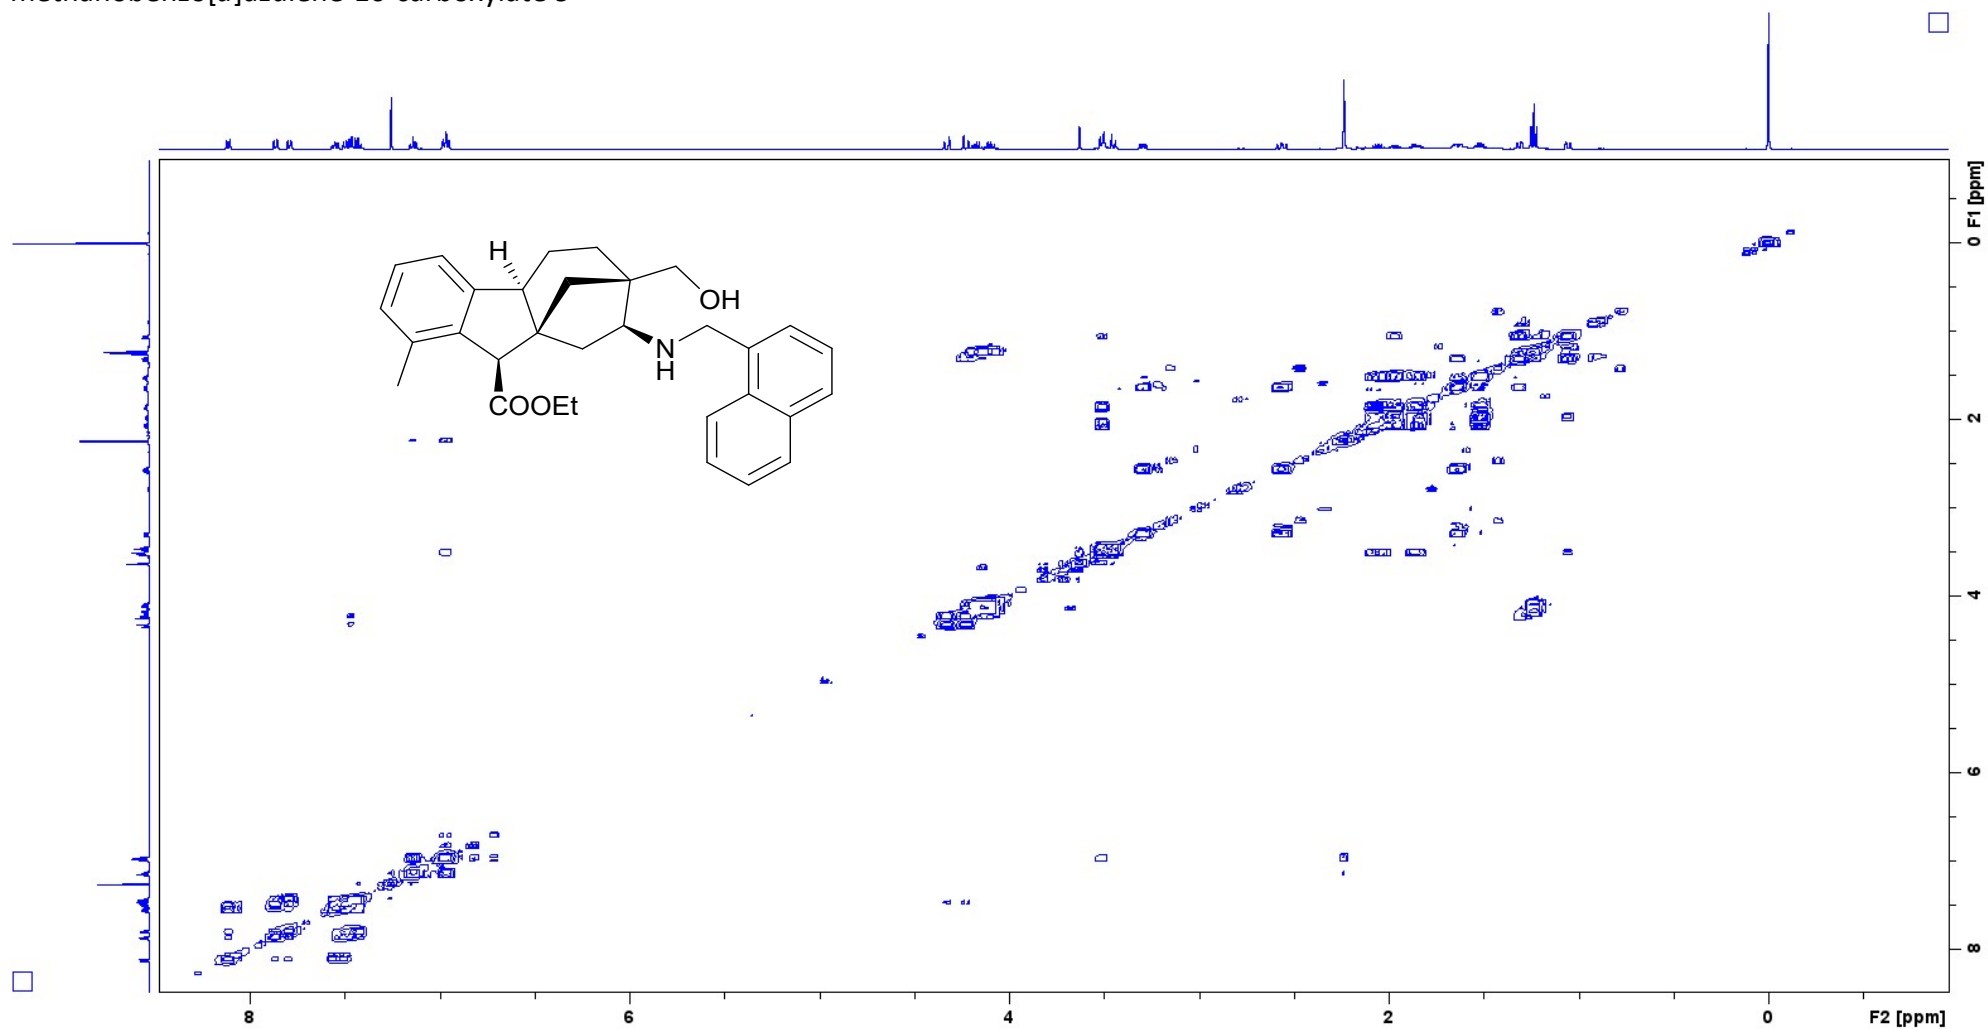

NOESY of ethyl (4*S*,7*R*,8*S*,9*aS*,10*R*)-7-(hydroxymethyl)-1-methyl-8-((naphthalen-1-ylmethyl)amino)-4*b*,6,7,8,9,10-hexahydro-5*H*-7,9*a*-methanobenzo[*a*]azulene-10-carboxylate **9**

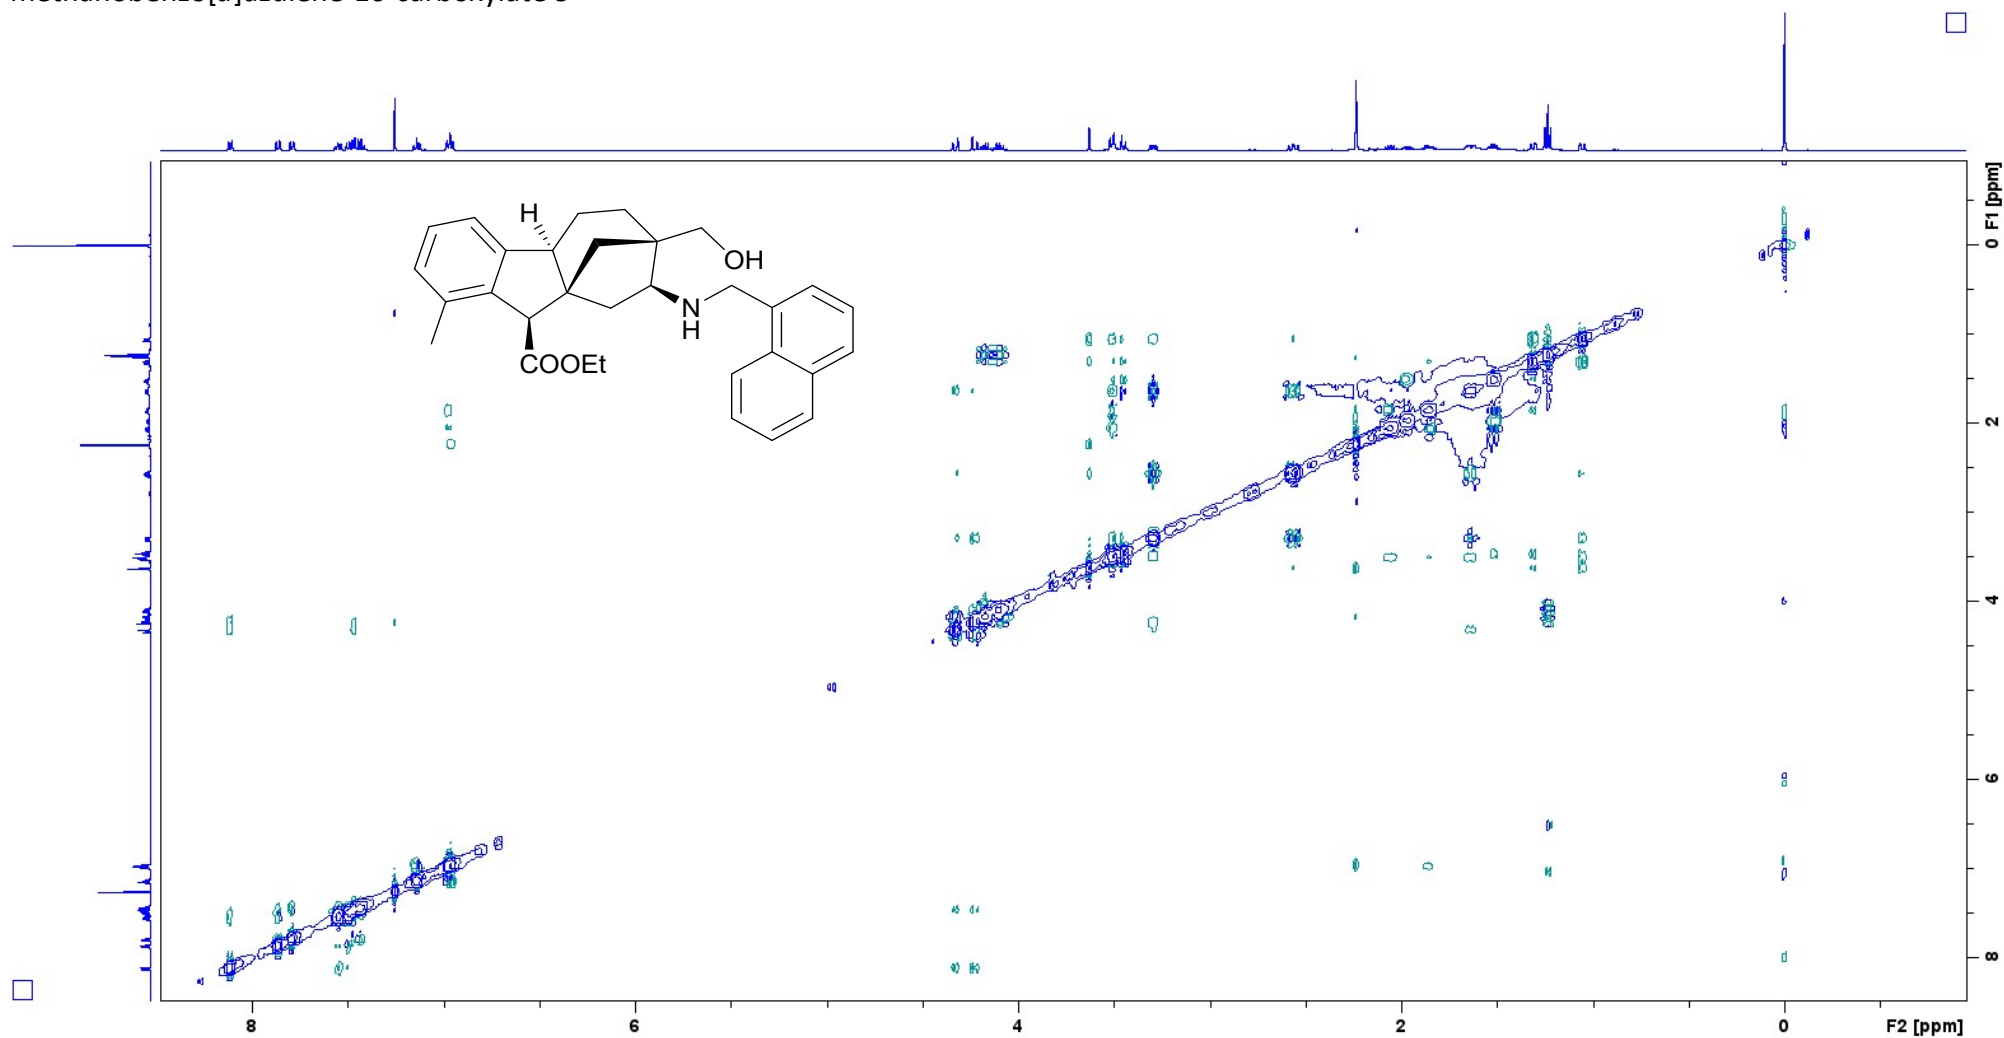

HSQC of ethyl (4*S*,7*R*,8*S*,9*aS*,10*R*)-7-(hydroxymethyl)-1-methyl-8-((naphthalen-1-ylmethyl)amino)-4*b*,6,7,8,9,10-hexahydro-5*H*-7,9*a*-methanobenzo[*a*]azulene-10-carboxylate **9**

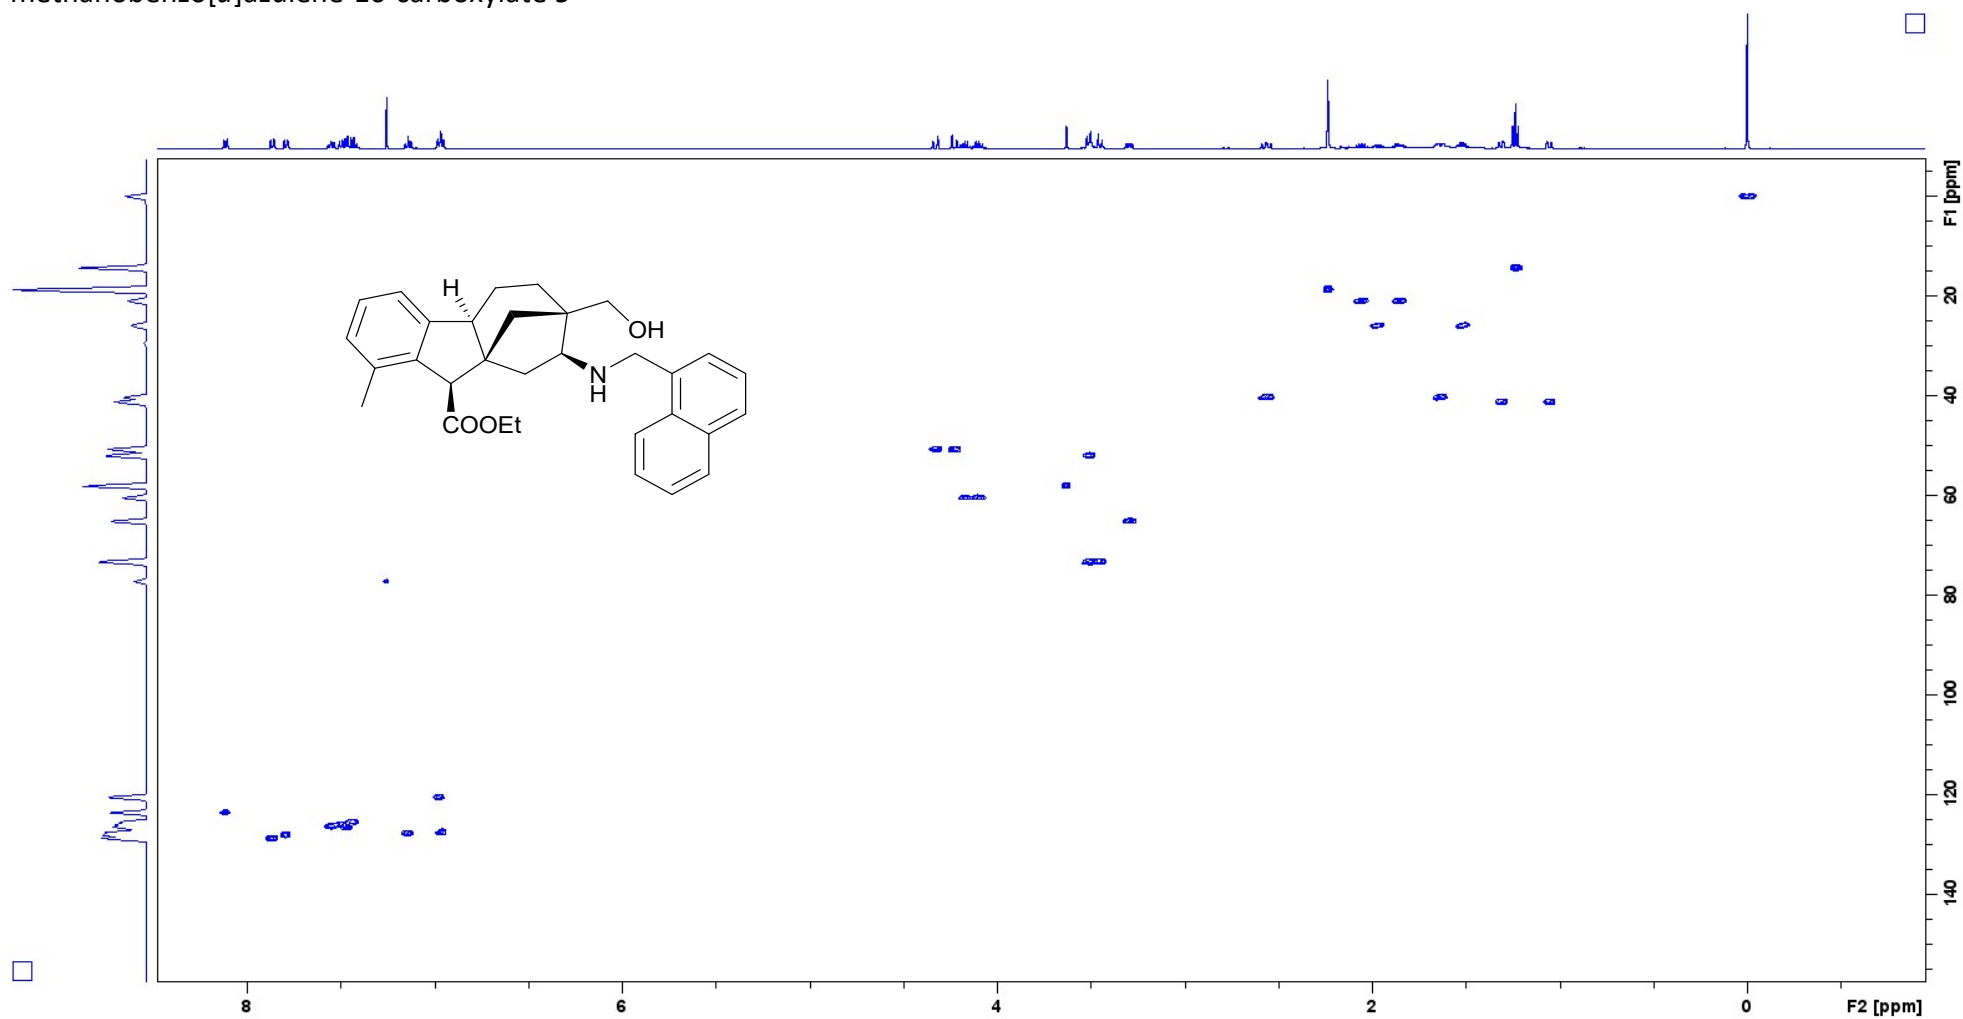

HMBC of ethyl (4*S*,7*R*,8*S*,9*aS*,10*R*)-7-(hydroxymethyl)-1-methyl-8-((naphthalen-1-ylmethyl)amino)-4*b*,6,7,8,9,10-hexahydro-5*H*-7,9*a*-methanobenzo[*a*]azulene-10-carboxylate **9**

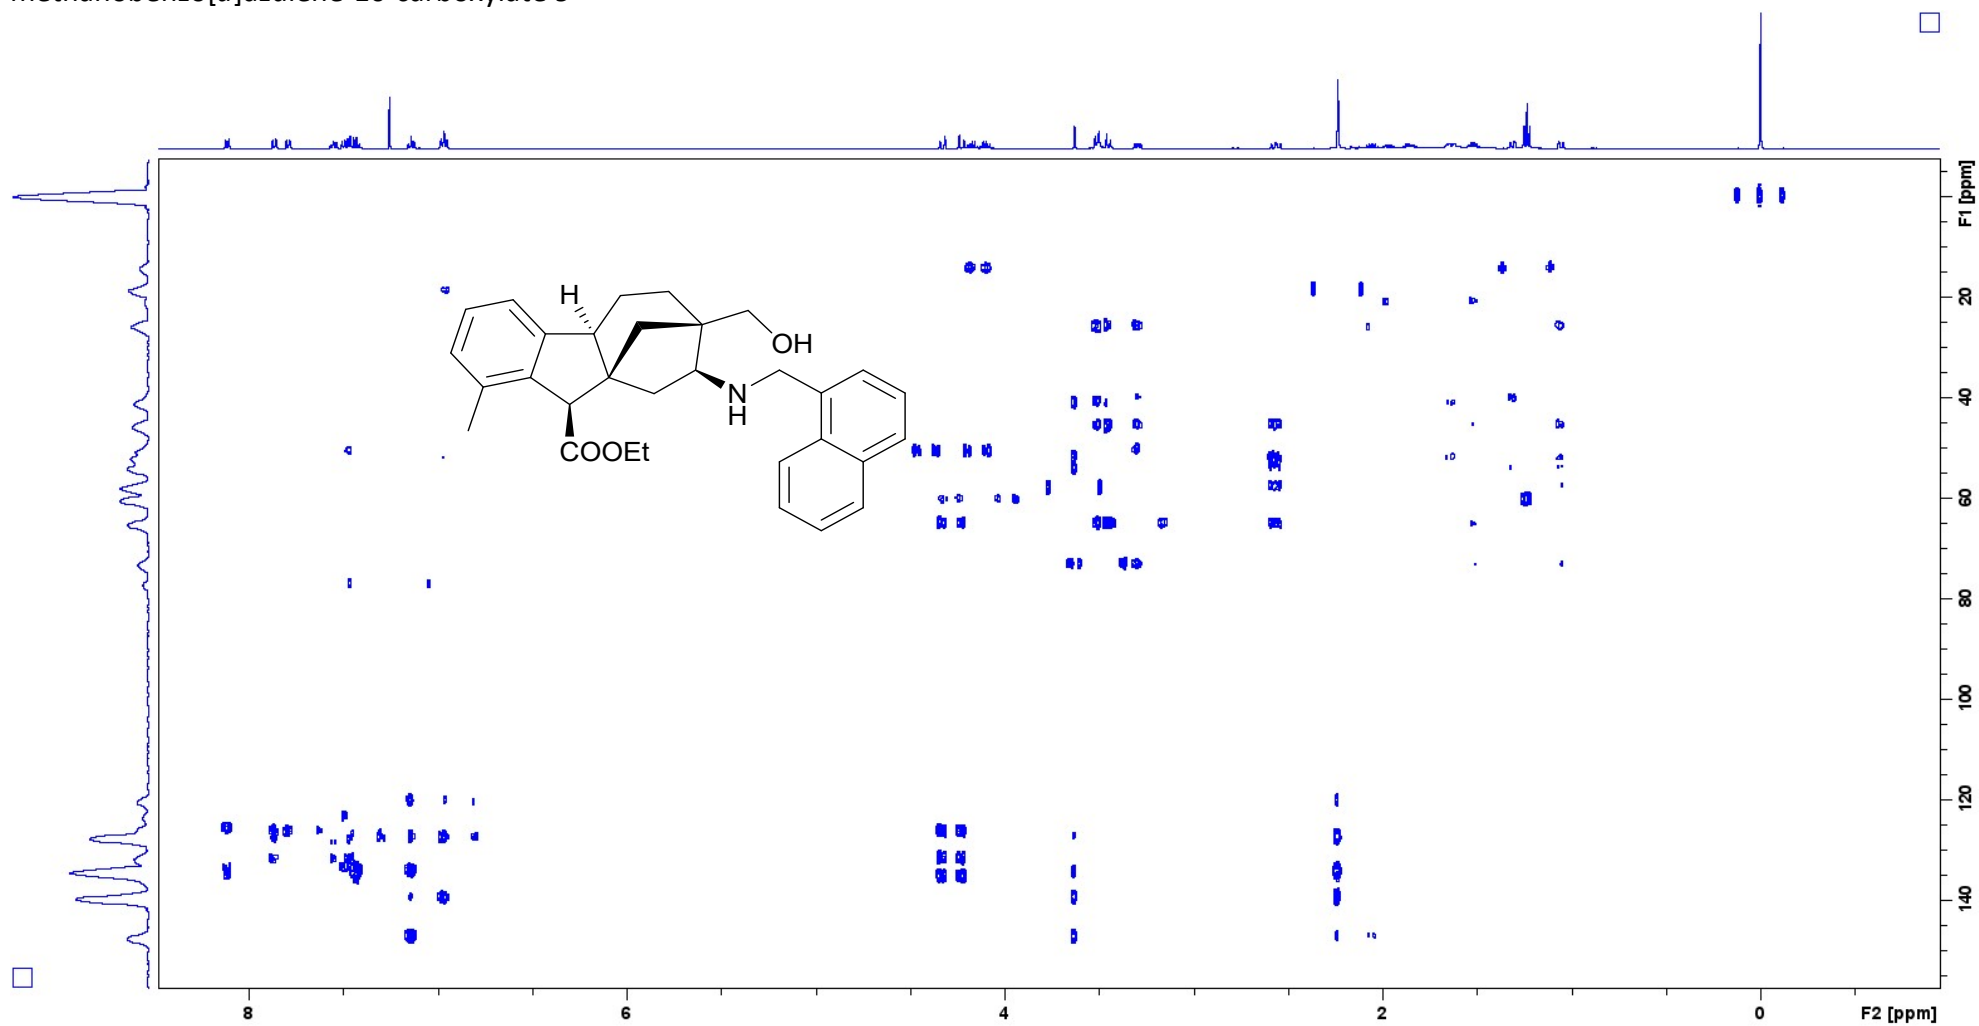

$^1\text{H-NMR}$  of ethyl (4*S*,7*R*,8*S*,9*a*,10*R*)-7-(hydroxymethyl)-1-methyl-8-(((*S*)-1-(naphthalen-2-yl)ethyl)amino)-4*b*,6,7,8,9,10-hexahydro-5*H*-7,9*a*-methanobenzo[*a*]azulene-10-carboxylate **10**

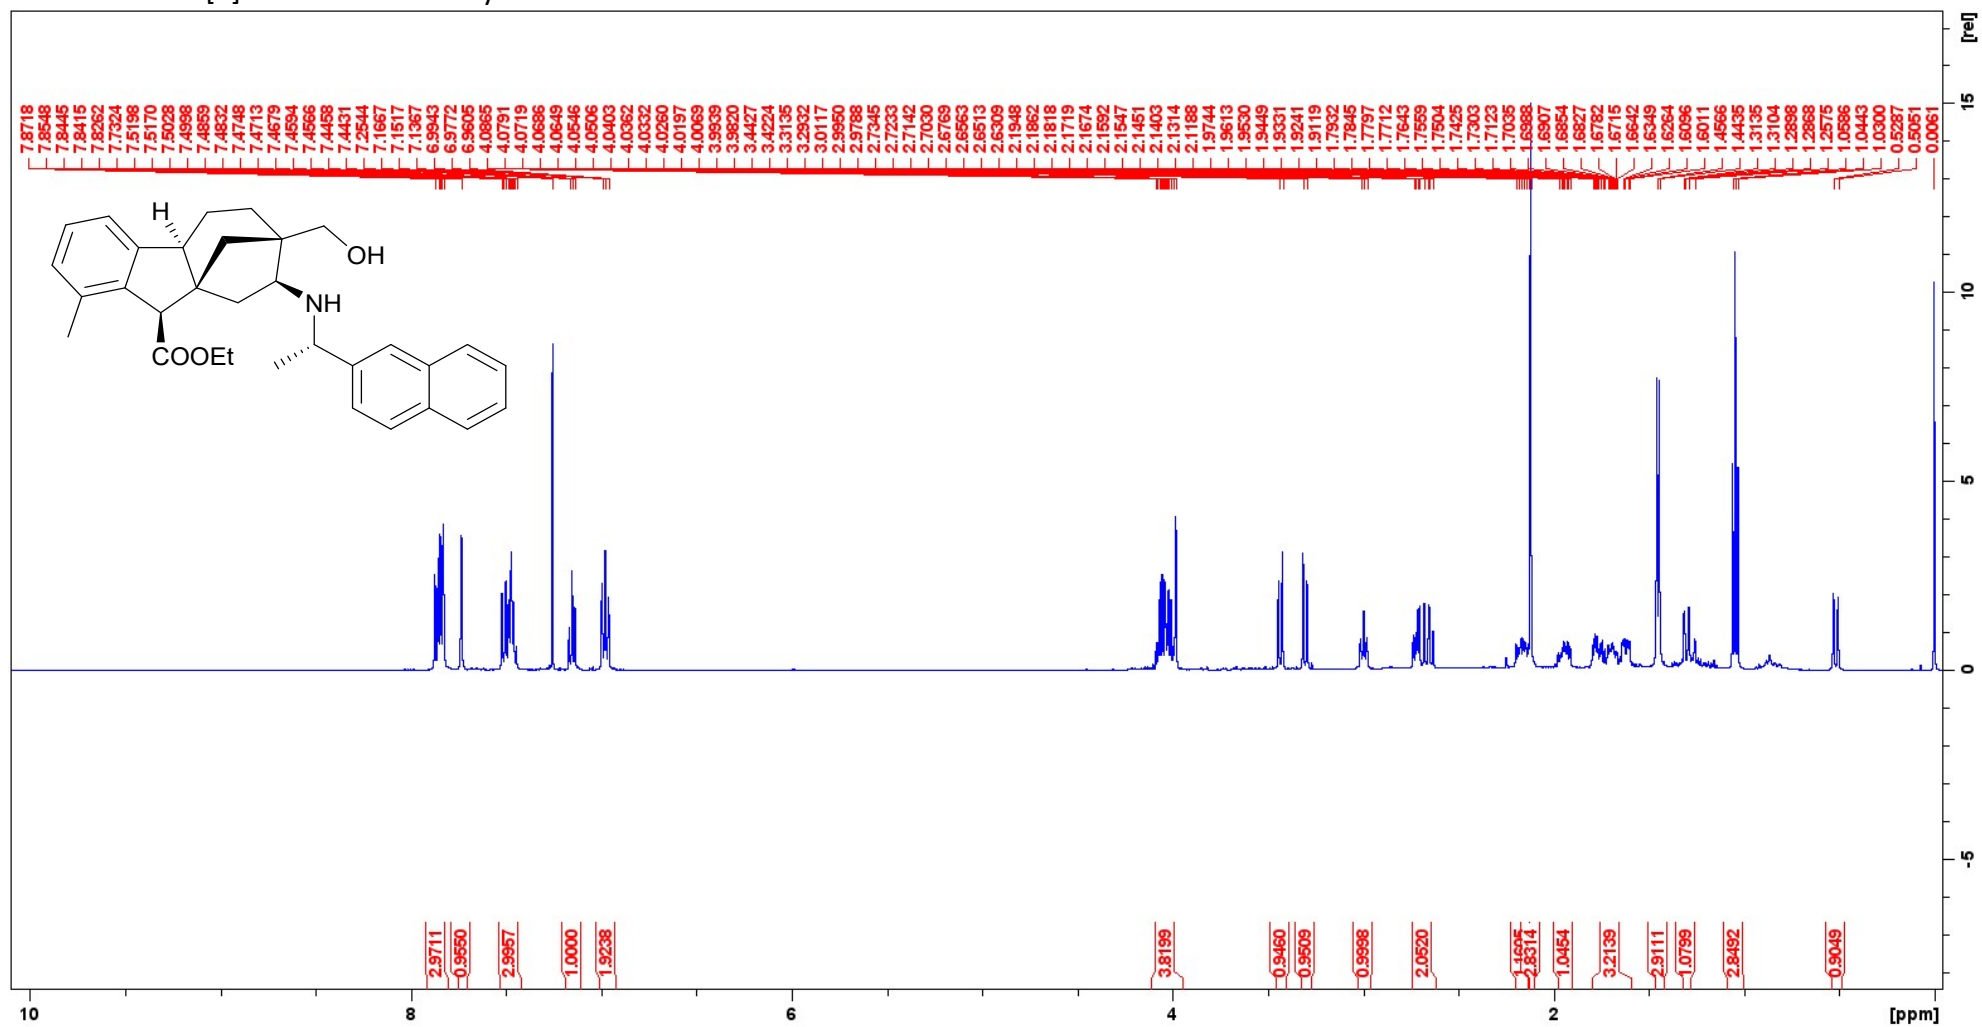



<sup>13</sup>C-NMR of ethyl (4*S*,7*R*,8*S*,9*aS*,10*R*)-7-(hydroxymethyl)-1-methyl-8-(((*S*)-1-(naphthalen-2-yl)ethyl)amino)-4*b*,6,7,8,9,10-hexahydro-5*H*-7,9*a*-methanobenzo[*a*]azulene-10-carboxylate **10**

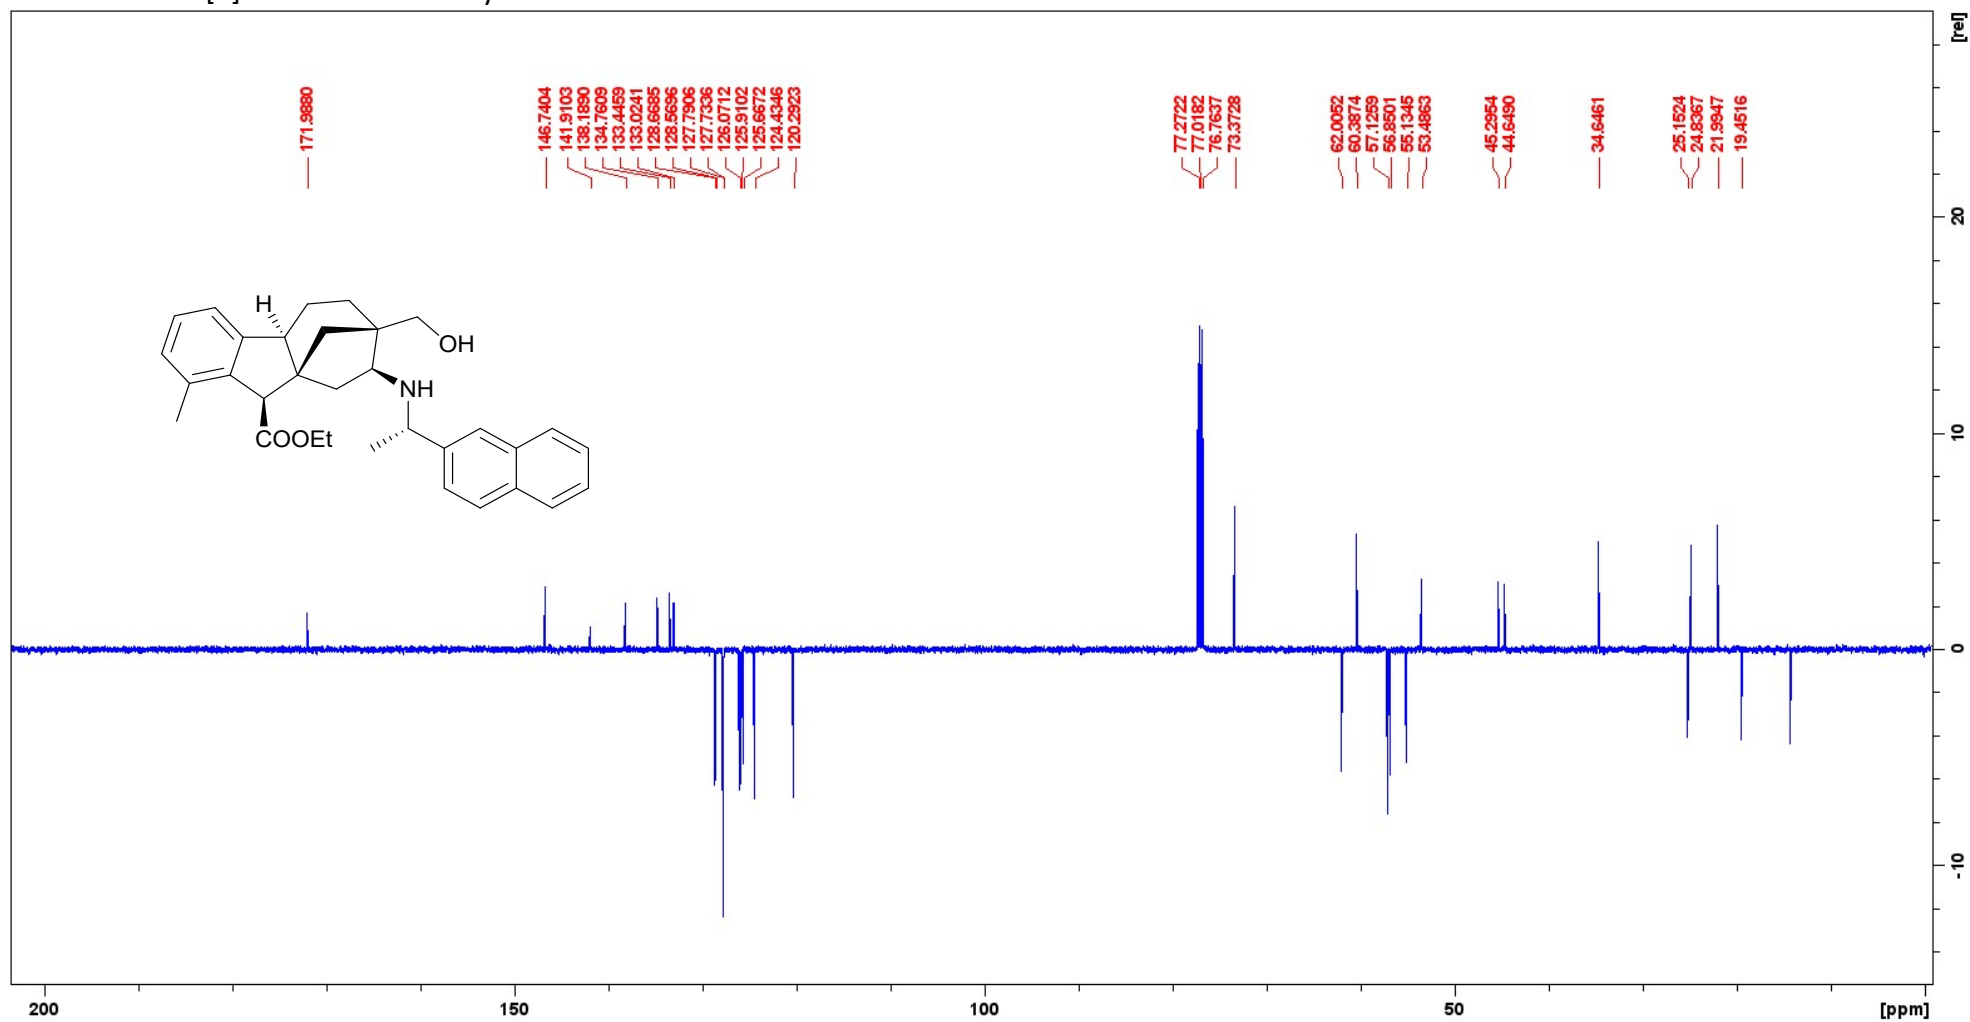

COSY of ethyl (4*S*,7*R*,8*S*,9*aS*,10*R*)-7-(hydroxymethyl)-1-methyl-8-(((*S*)-1-(naphthalen-2-yl)ethyl)amino)-4*b*,6,7,8,9,10-hexahydro-5*H*-7,9*a*-methanobenzo[*a*]azulene-10-carboxylate **10**

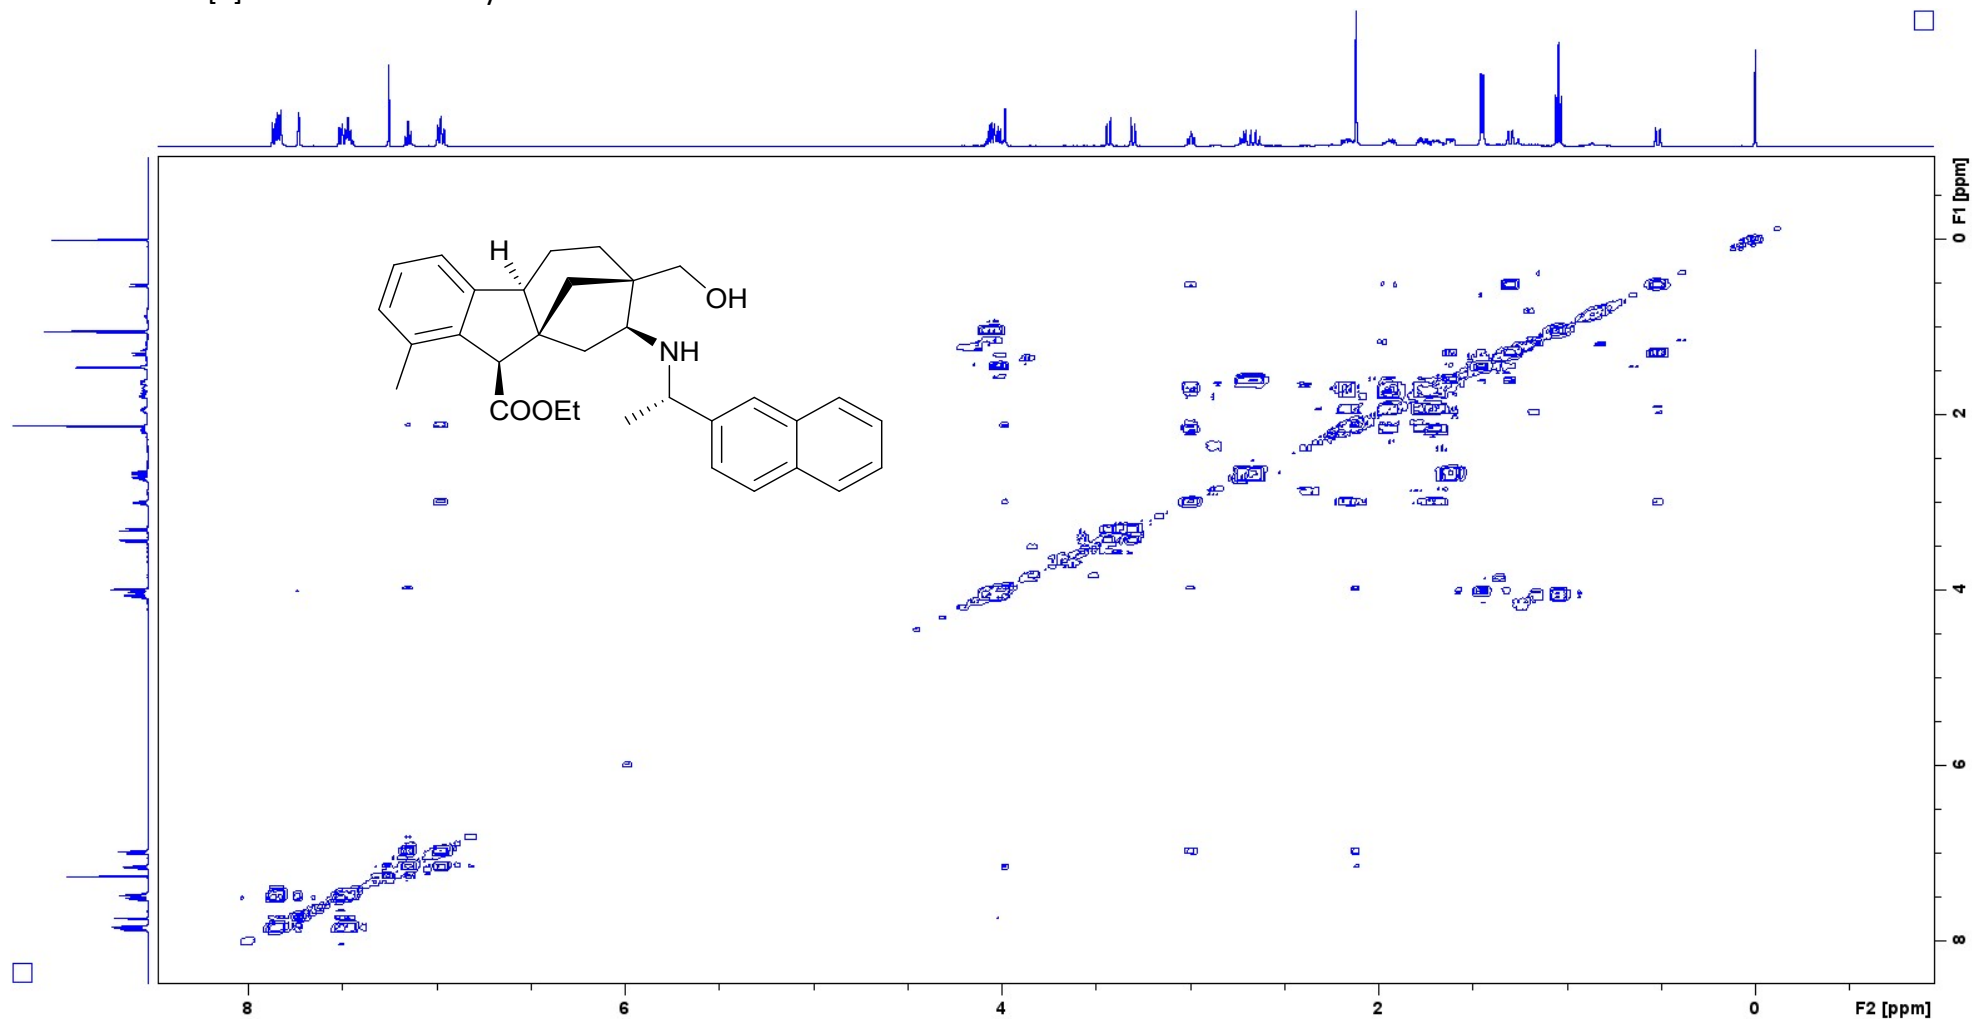

NOESY of ethyl (4*bS*,7*R*,8*S*,9*aS*,10*R*)-7-(hydroxymethyl)-1-methyl-8-(((*S*)-1-(naphthalen-2-yl)ethyl)amino)-4*b*,6,7,8,9,10-hexahydro-5*H*-7,9*a*-methanobenzo[*a*]azulene-10-carboxylate **10**

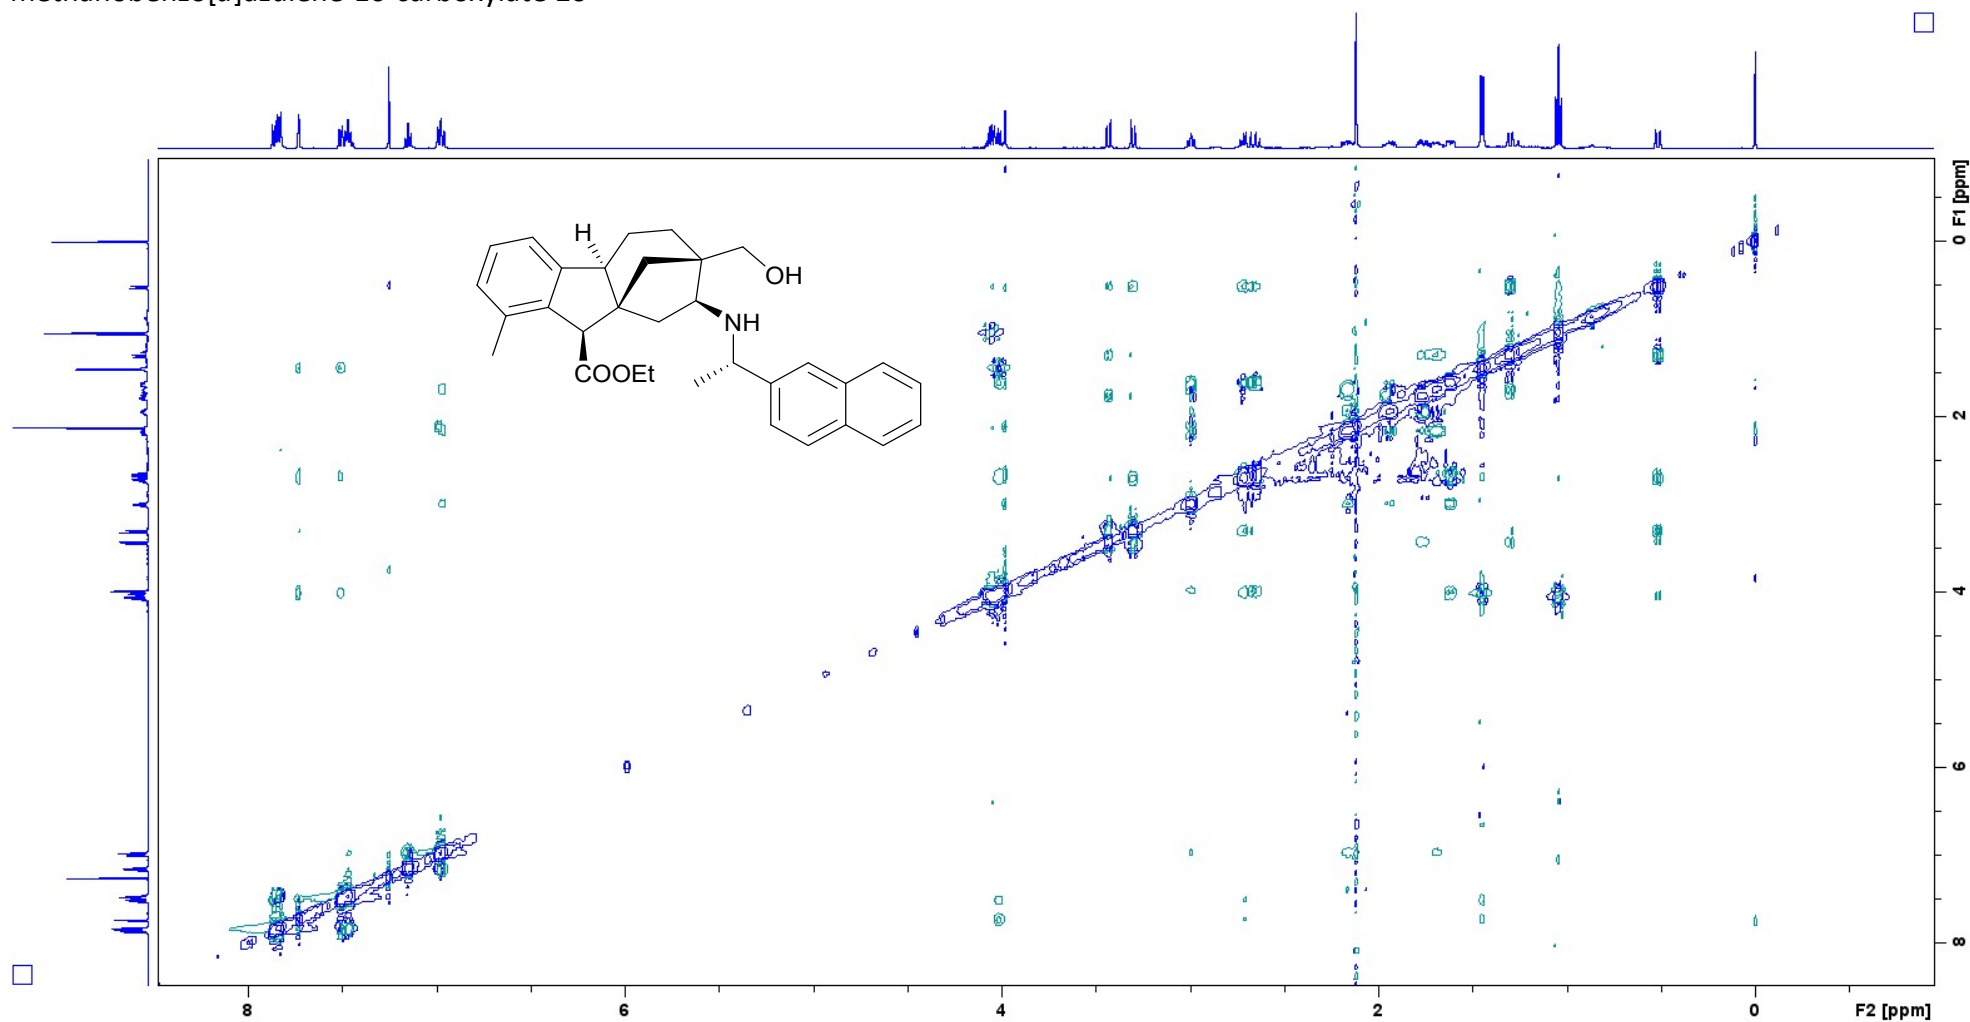

HSQC of ethyl (4*bS*,7*R*,8*S*,9*aS*,10*R*)-7-(hydroxymethyl)-1-methyl-8-(((*S*)-1-(naphthalen-2-yl)ethyl)amino)-4*b*,6,7,8,9,10-hexahydro-5*H*-7,9a-methanobenzo[*a*]azulene-10-carboxylate **10**

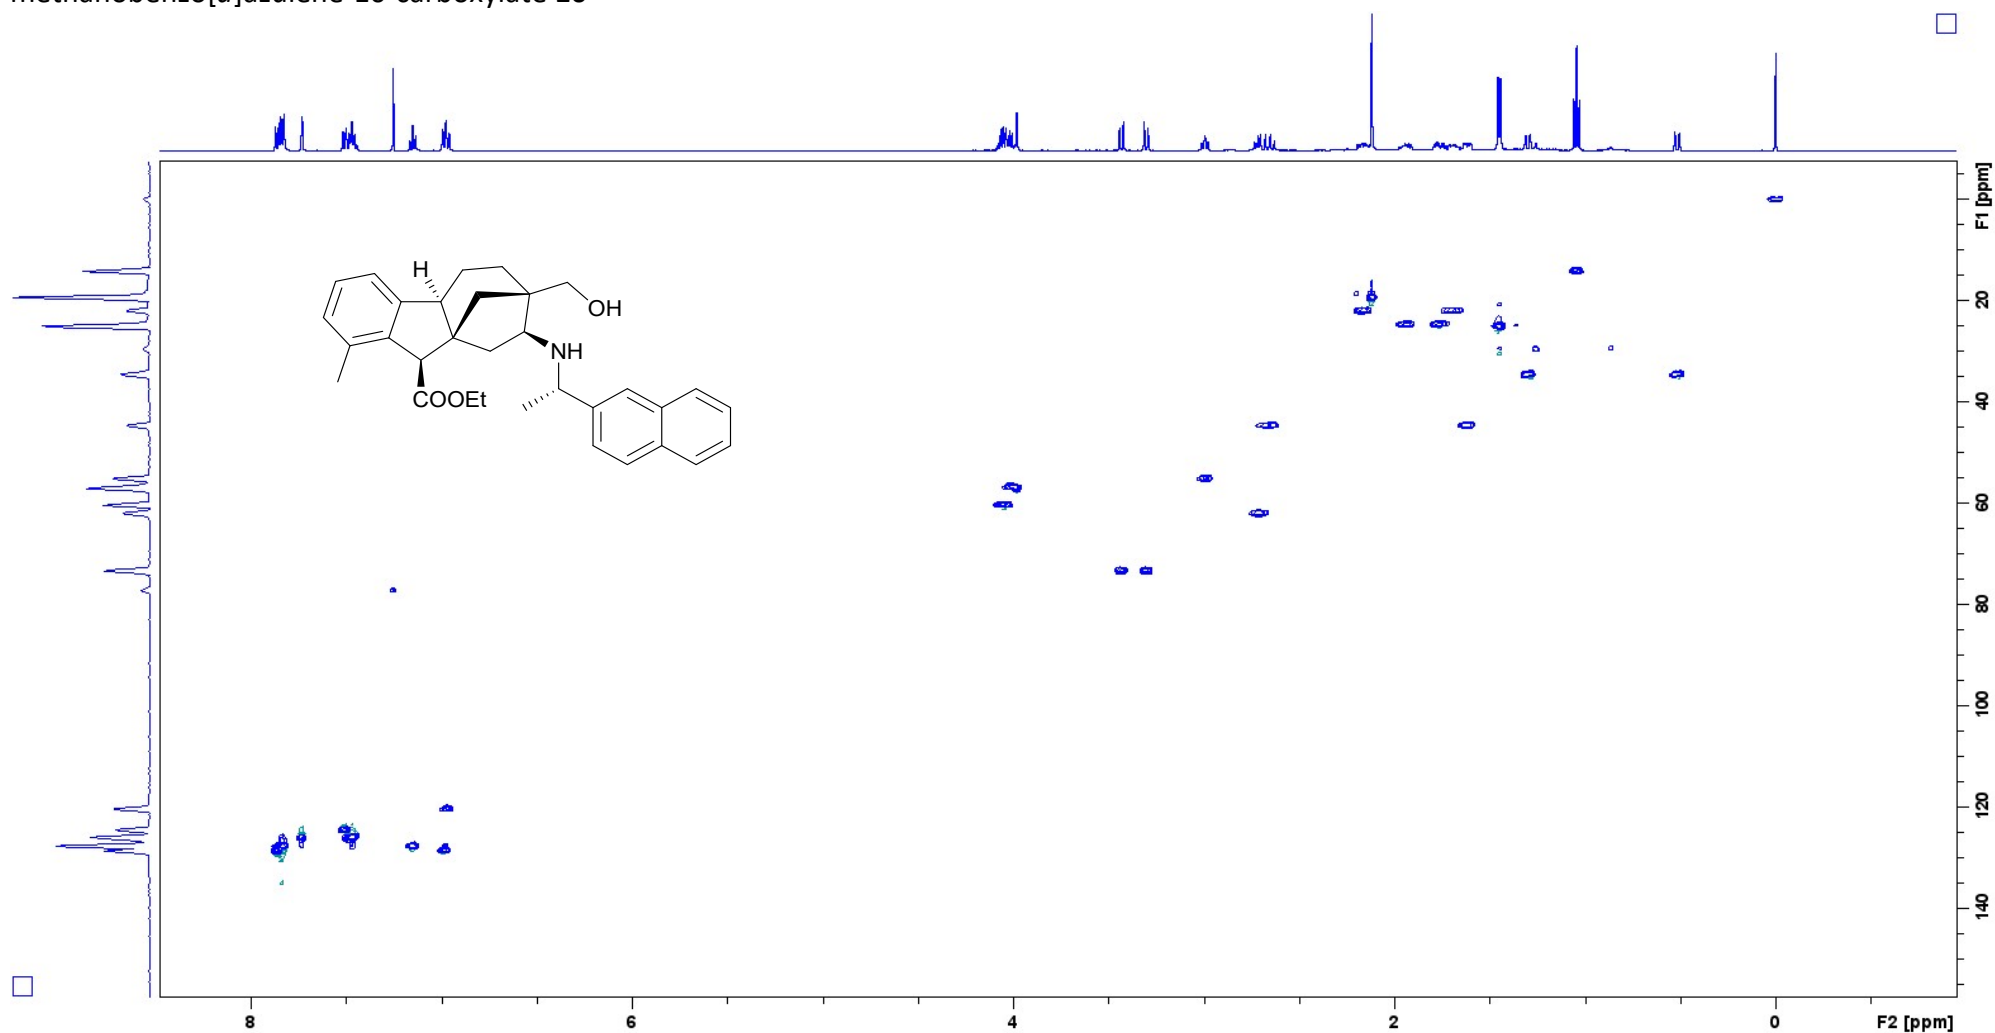

HMBC of ethyl (4*S*,7*R*,8*S*,9*aS*,10*R*)-7-(hydroxymethyl)-1-methyl-8-(((*S*)-1-(naphthalen-2-yl)ethyl)amino)-4*b*,6,7,8,9,10-hexahydro-5*H*-7,9a-methanobenzo[*a*]azulene-10-carboxylate **10**

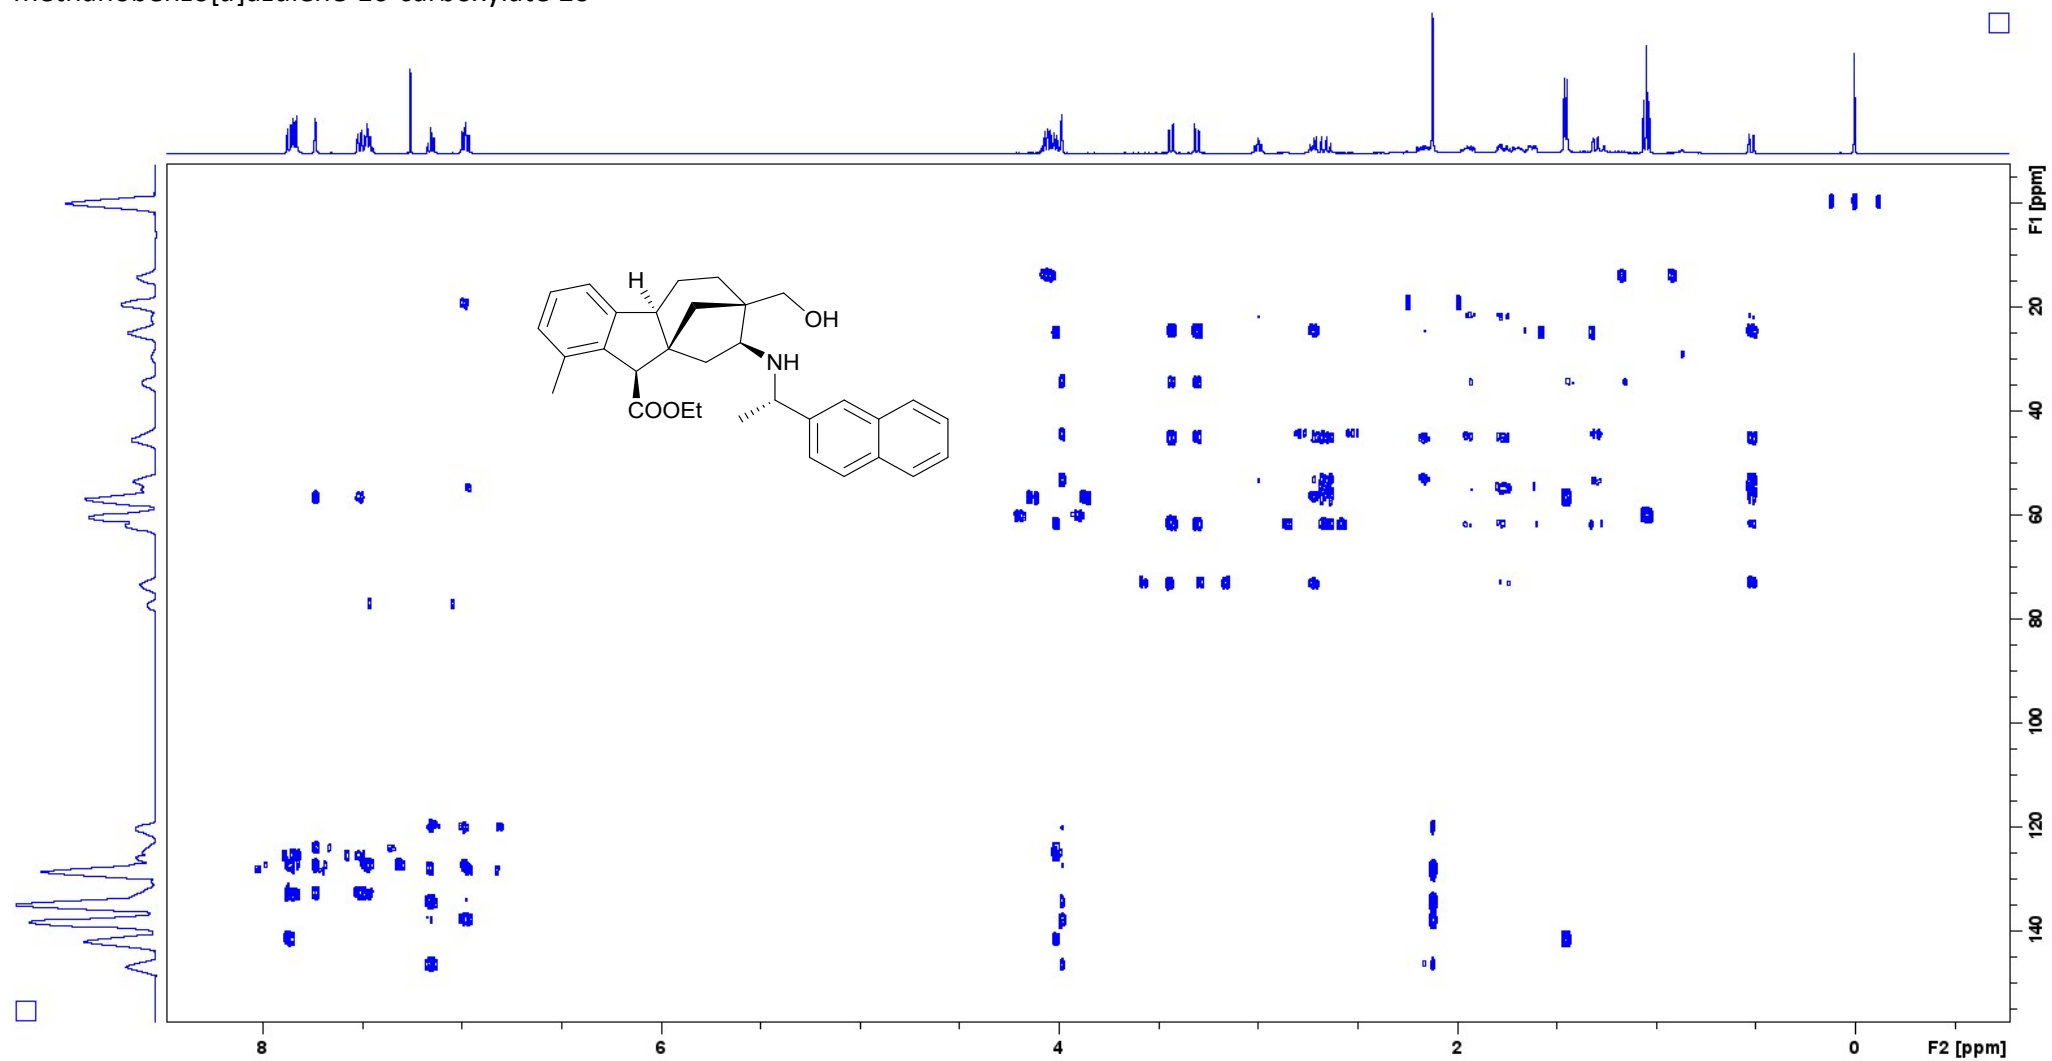

$^1\text{H-NMR}$  of ethyl (4*b*S,7*R*,8*S*,9*a*S,10*R*)-7-(hydroxymethyl)-1-methyl-8-(((*R*)-1-(naphthalen-2-yl)ethyl)amino)-4*b*,6,7,8,9,10-hexahydro-5*H*-7,9*a*-methanobenzo[*a*]azulene-10-carboxylate **11**

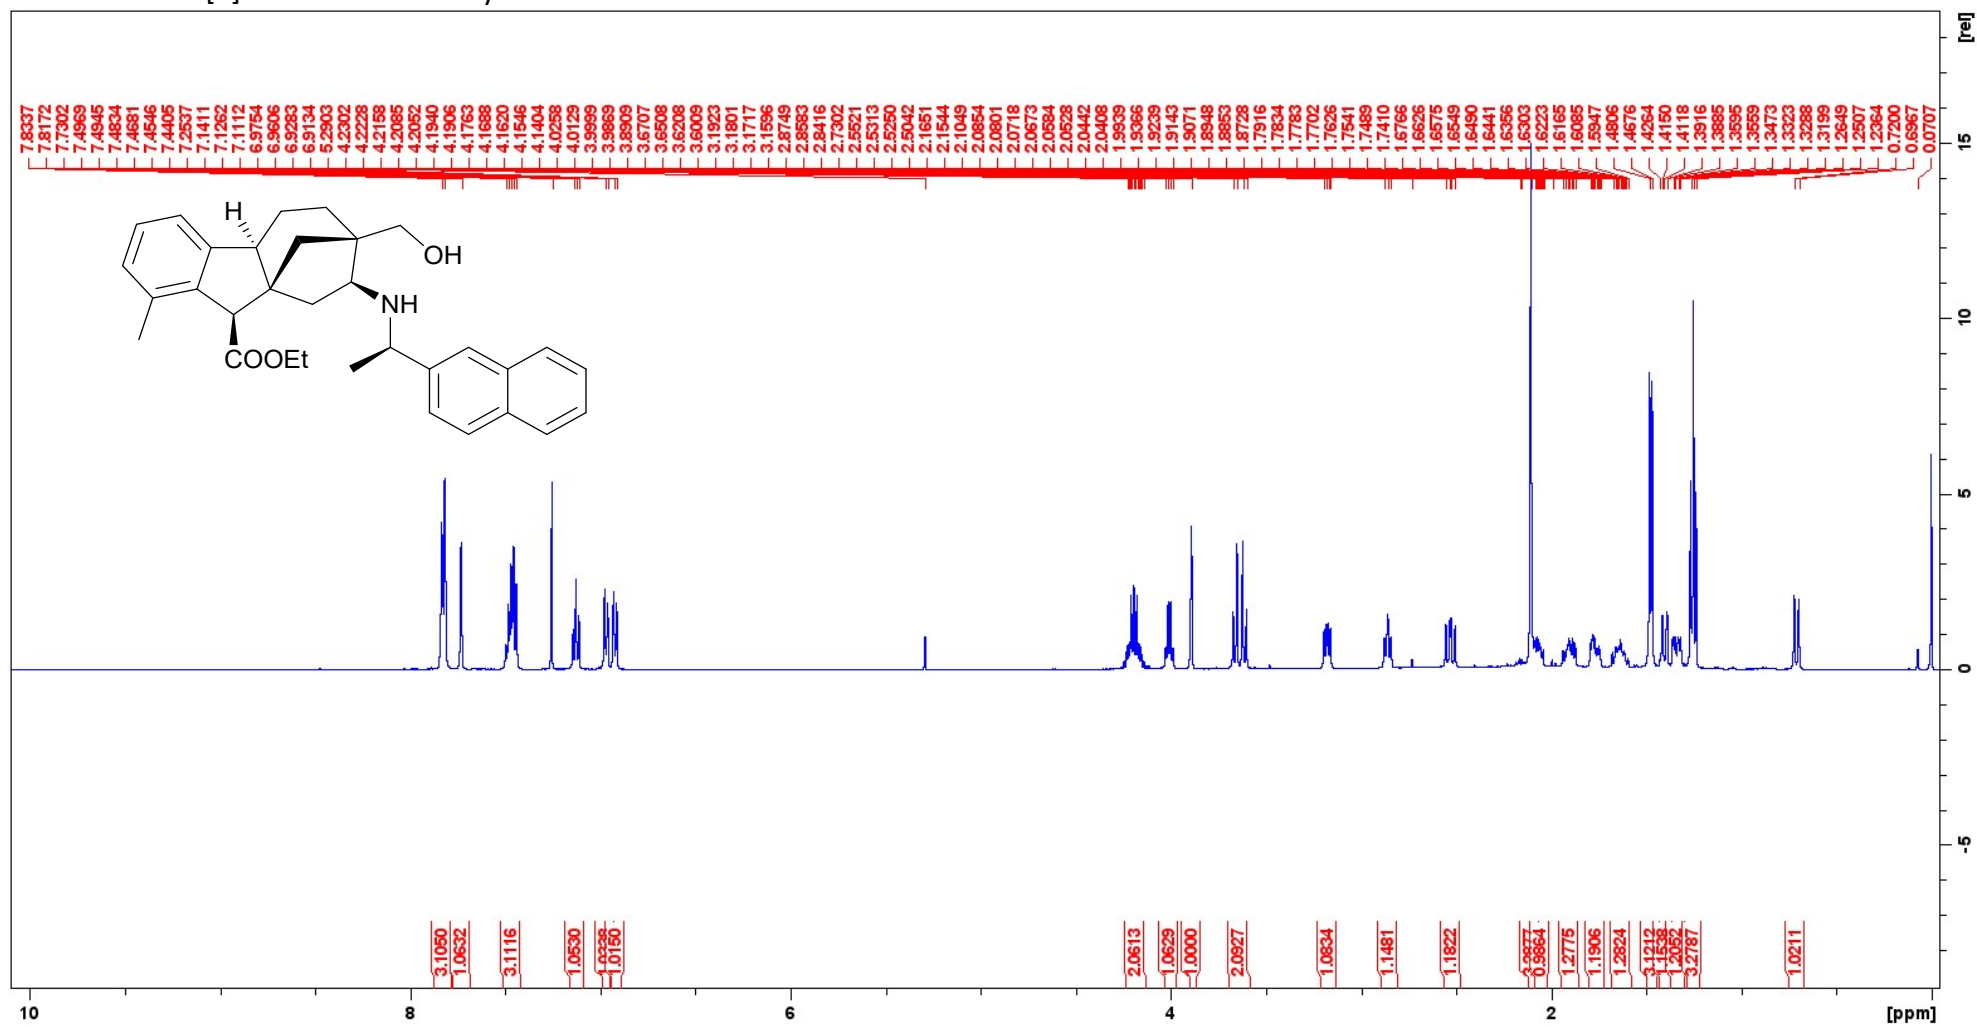

<sup>13</sup>C-NMR of ethyl (4*S*,7*R*,8*S*,9*aS*,10*R*)-7-(hydroxymethyl)-1-methyl-8-(((*R*)-1-(naphthalen-2-yl)ethyl)amino)-4*b*,6,7,8,9,10-hexahydro-5*H*-7,9*a*-methanobenzo[*a*]azulene-10-carboxylate **11**

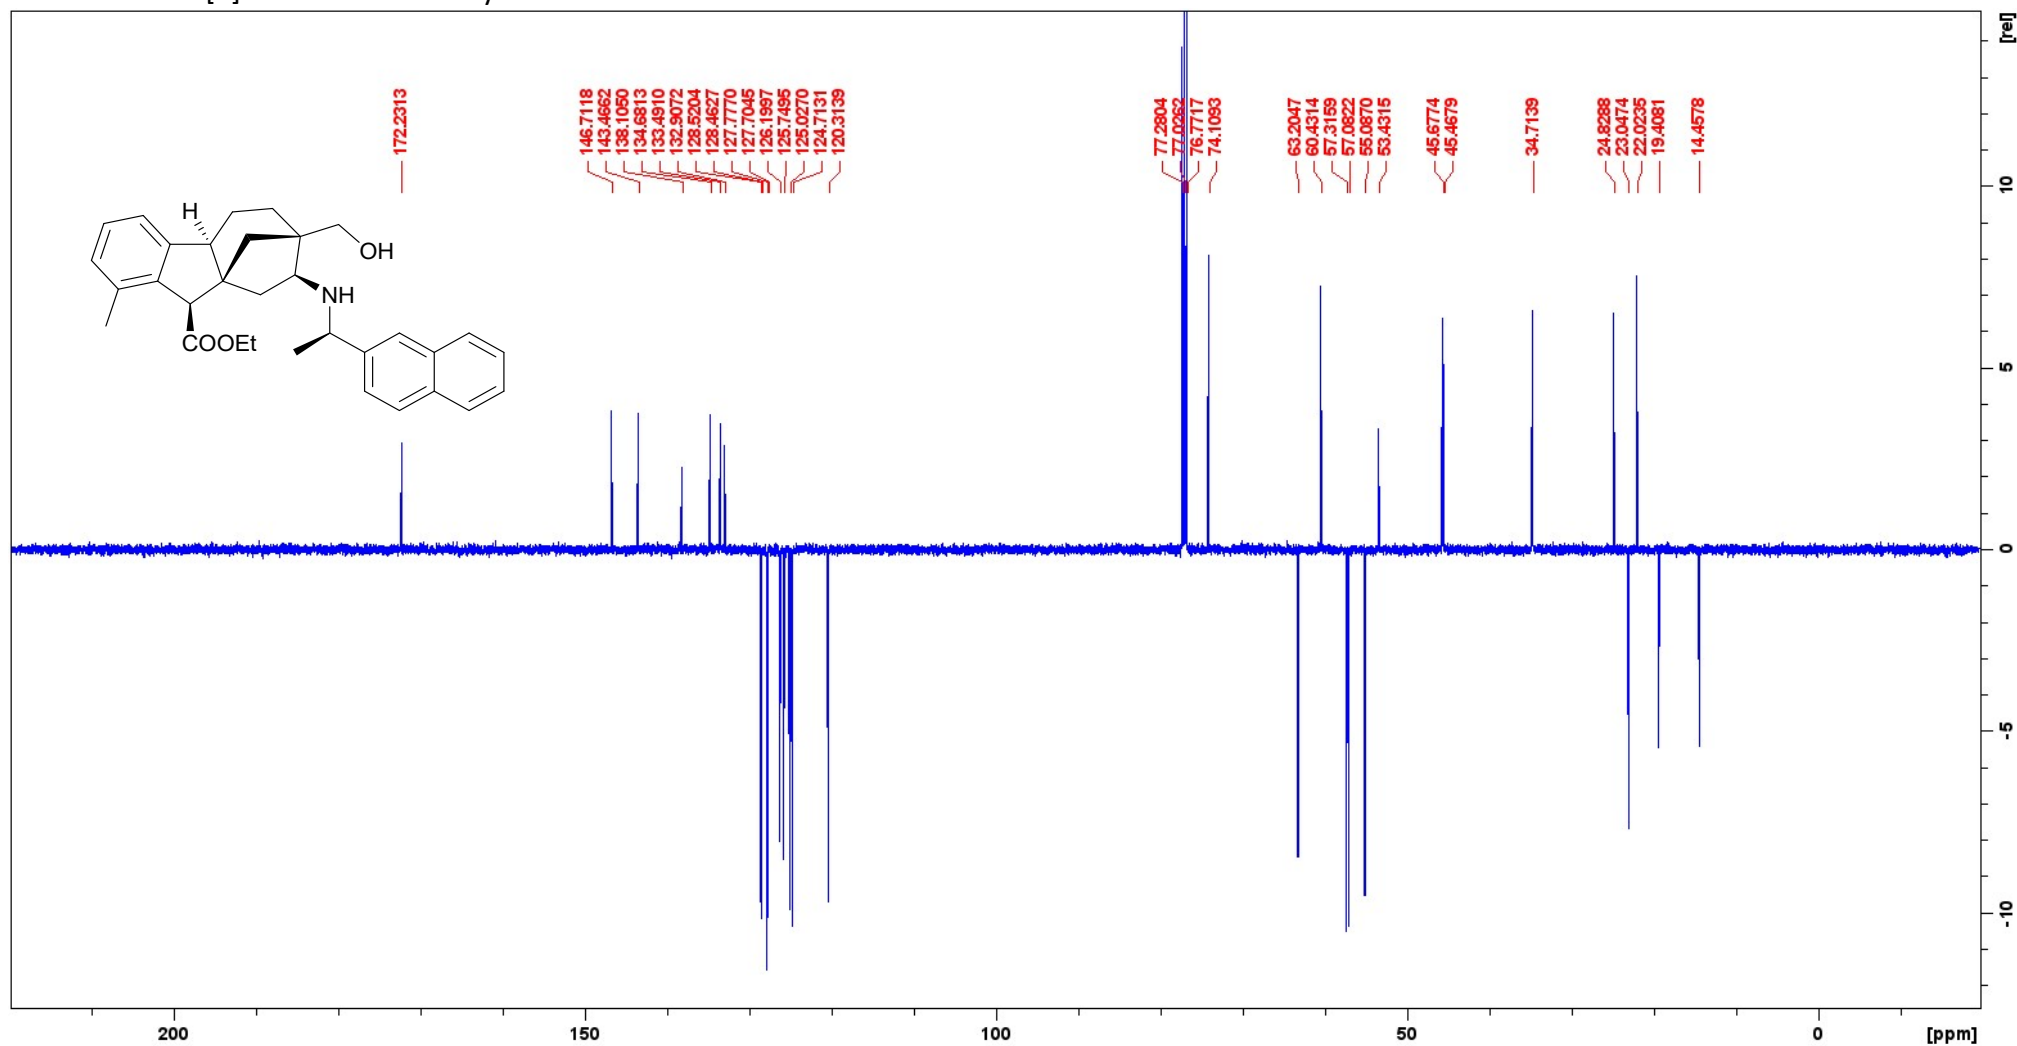

COSY of ethyl (4*S*,7*R*,8*S*,9*aS*,10*R*)-7-(hydroxymethyl)-1-methyl-8-(((*R*)-1-(naphthalen-2-yl)ethyl)amino)-4*b*,6,7,8,9,10-hexahydro-5*H*-7,9*a*-methanobenzo[*a*]azulene-10-carboxylate **11**

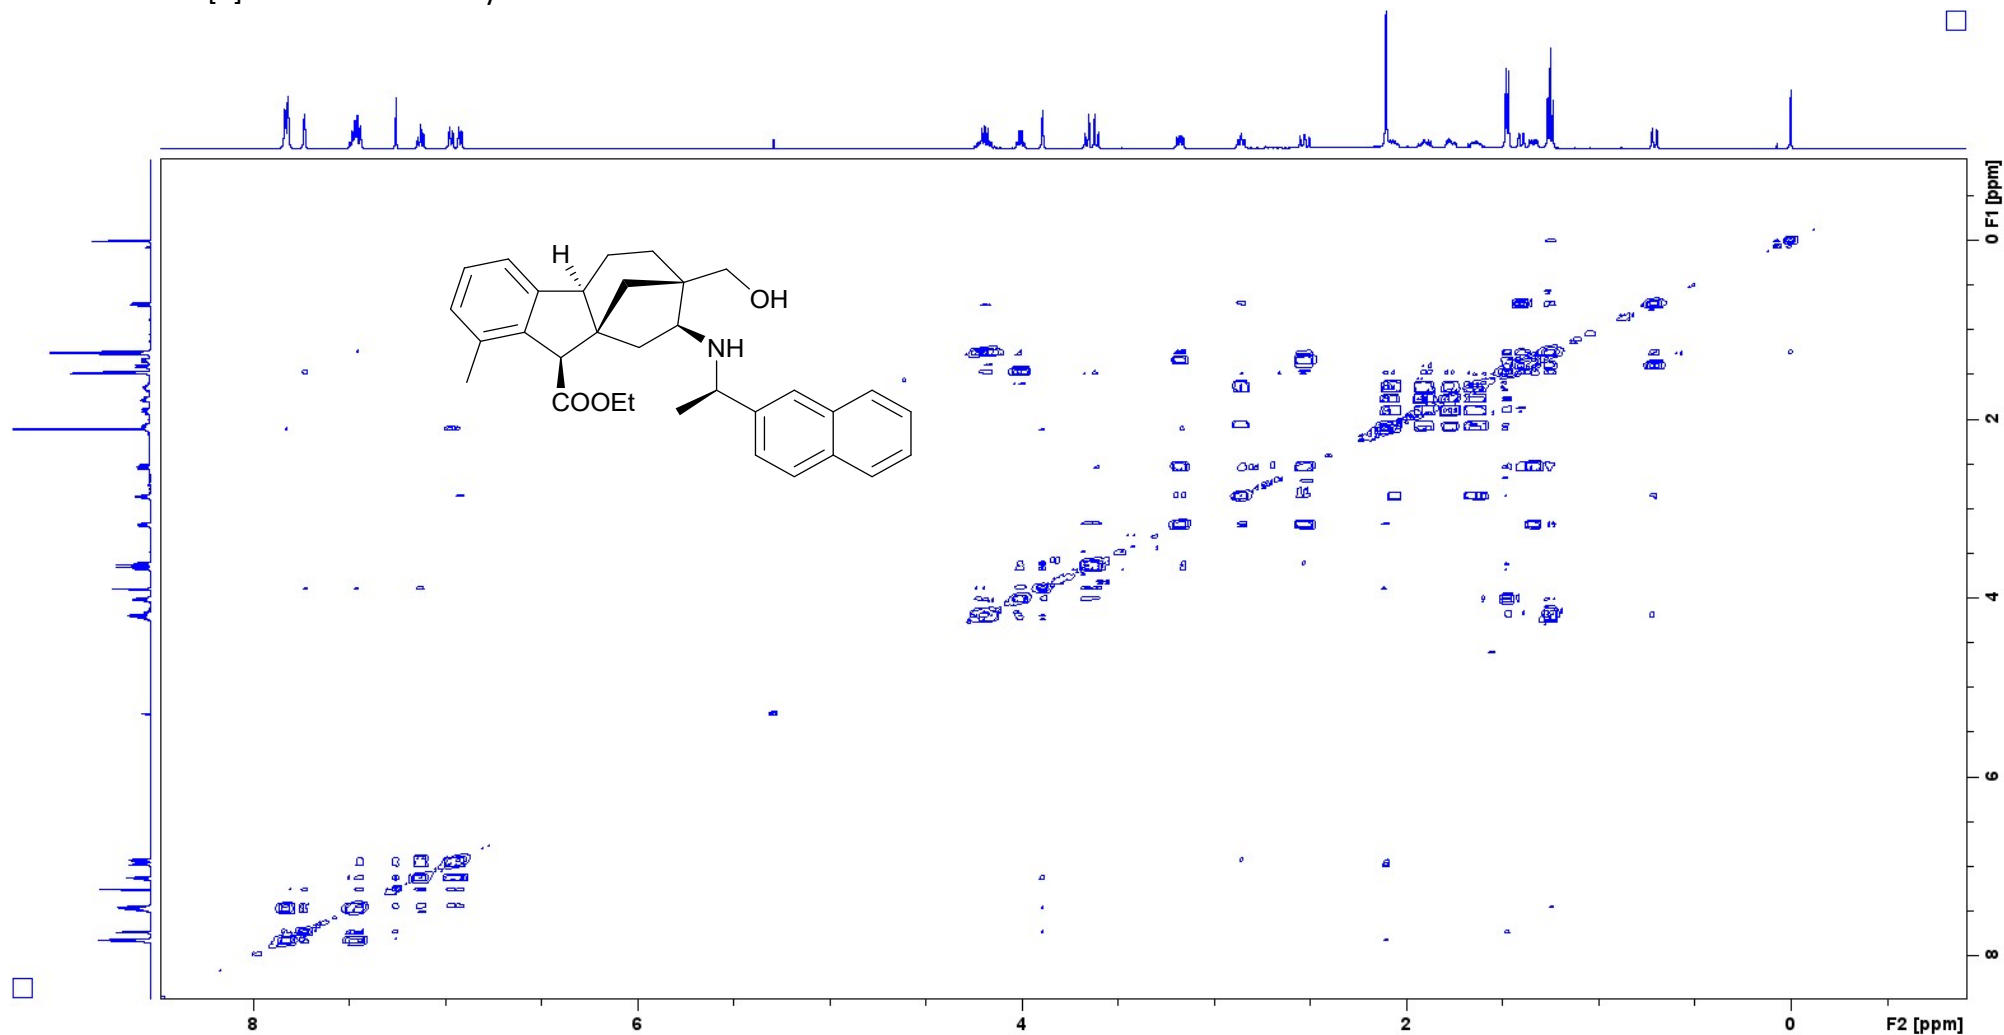



NOESY of ethyl (4*b**S*,7*R*,8*S*,9*a**S*,10*R*)-7-(hydroxymethyl)-1-methyl-8-(((*R*)-1-(naphthalen-2-yl)ethyl)amino)-4*b*,6,7,8,9,10-hexahydro-5*H*-7,9*a*-methanobenzo[*a*]azulene-10-carboxylate **11**

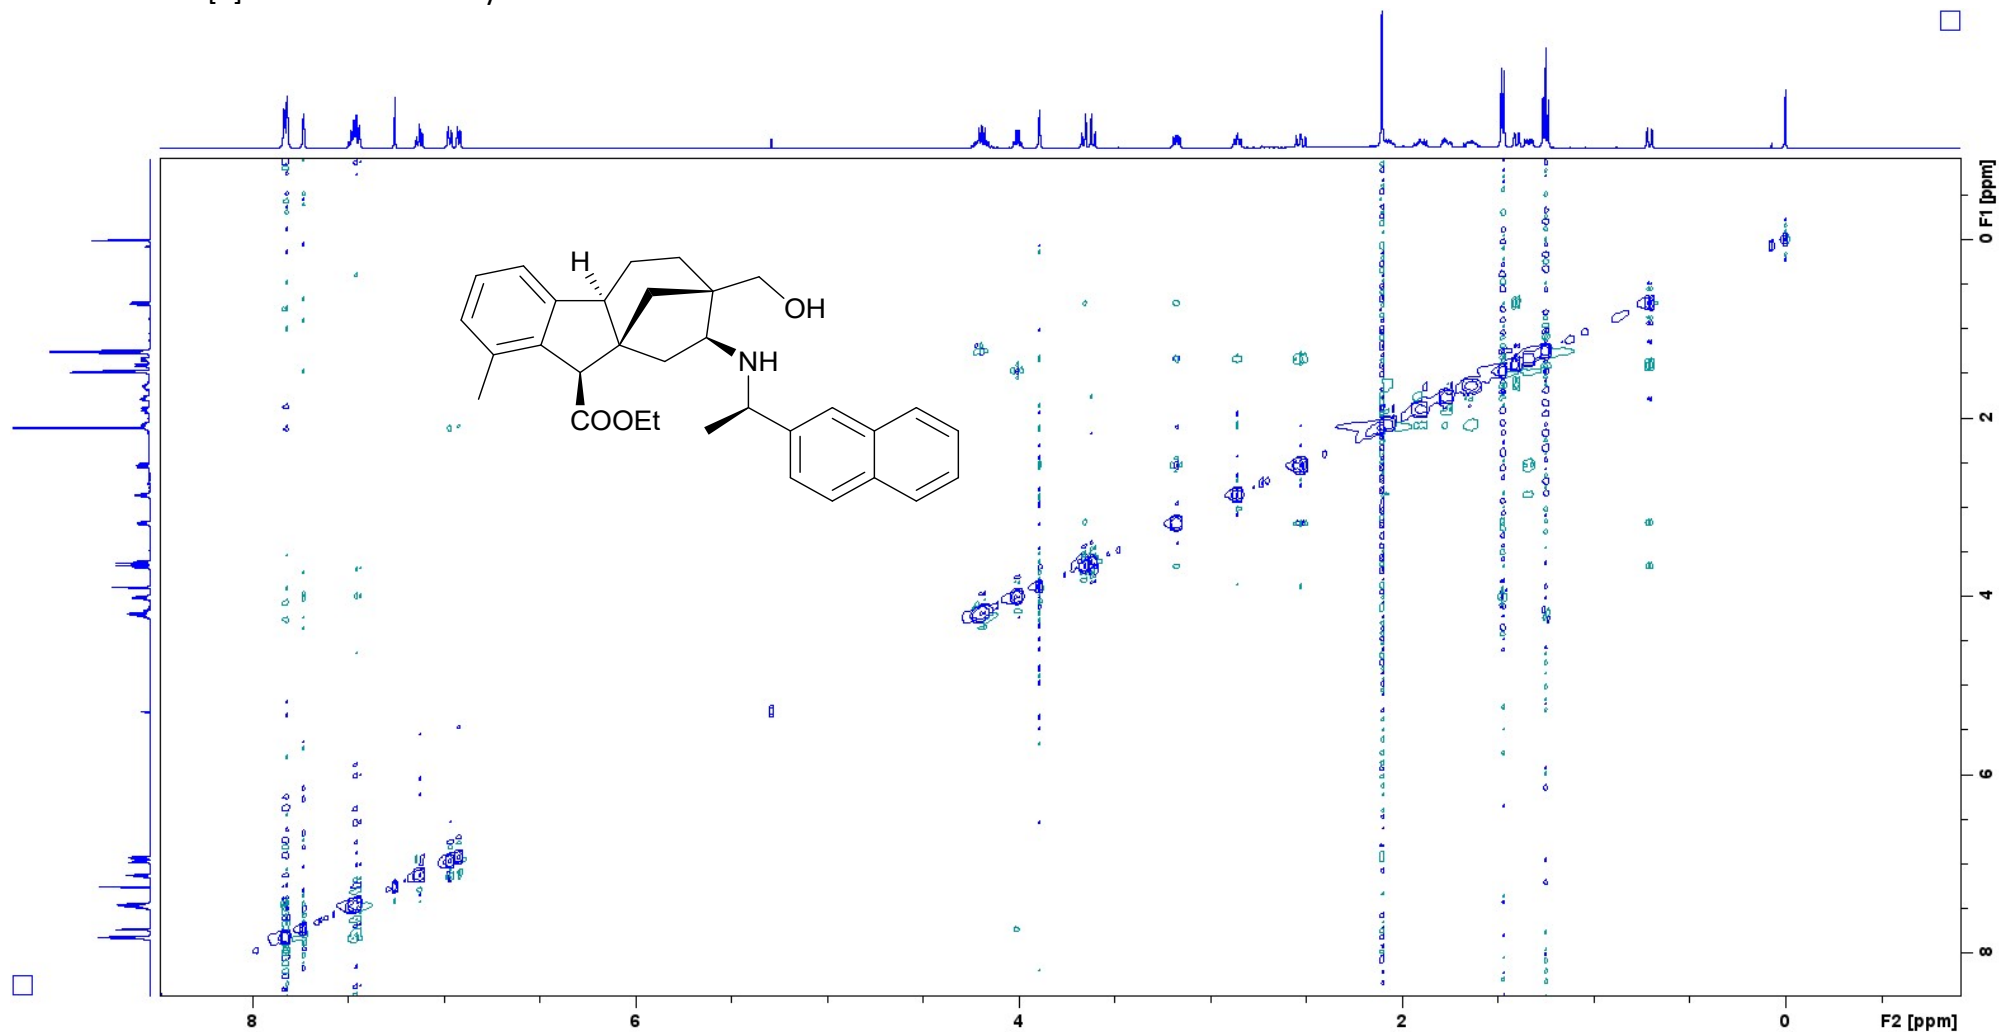

HSQC of ethyl (4*bS*,7*R*,8*S*,9*aS*,10*R*)-7-(hydroxymethyl)-1-methyl-8-(((*R*)-1-(naphthalen-2-yl)ethyl)amino)-4*b*,6,7,8,9,10-hexahydro-5*H*-7,9*a*-methanobenzo[*a*]azulene-10-carboxylate **11**

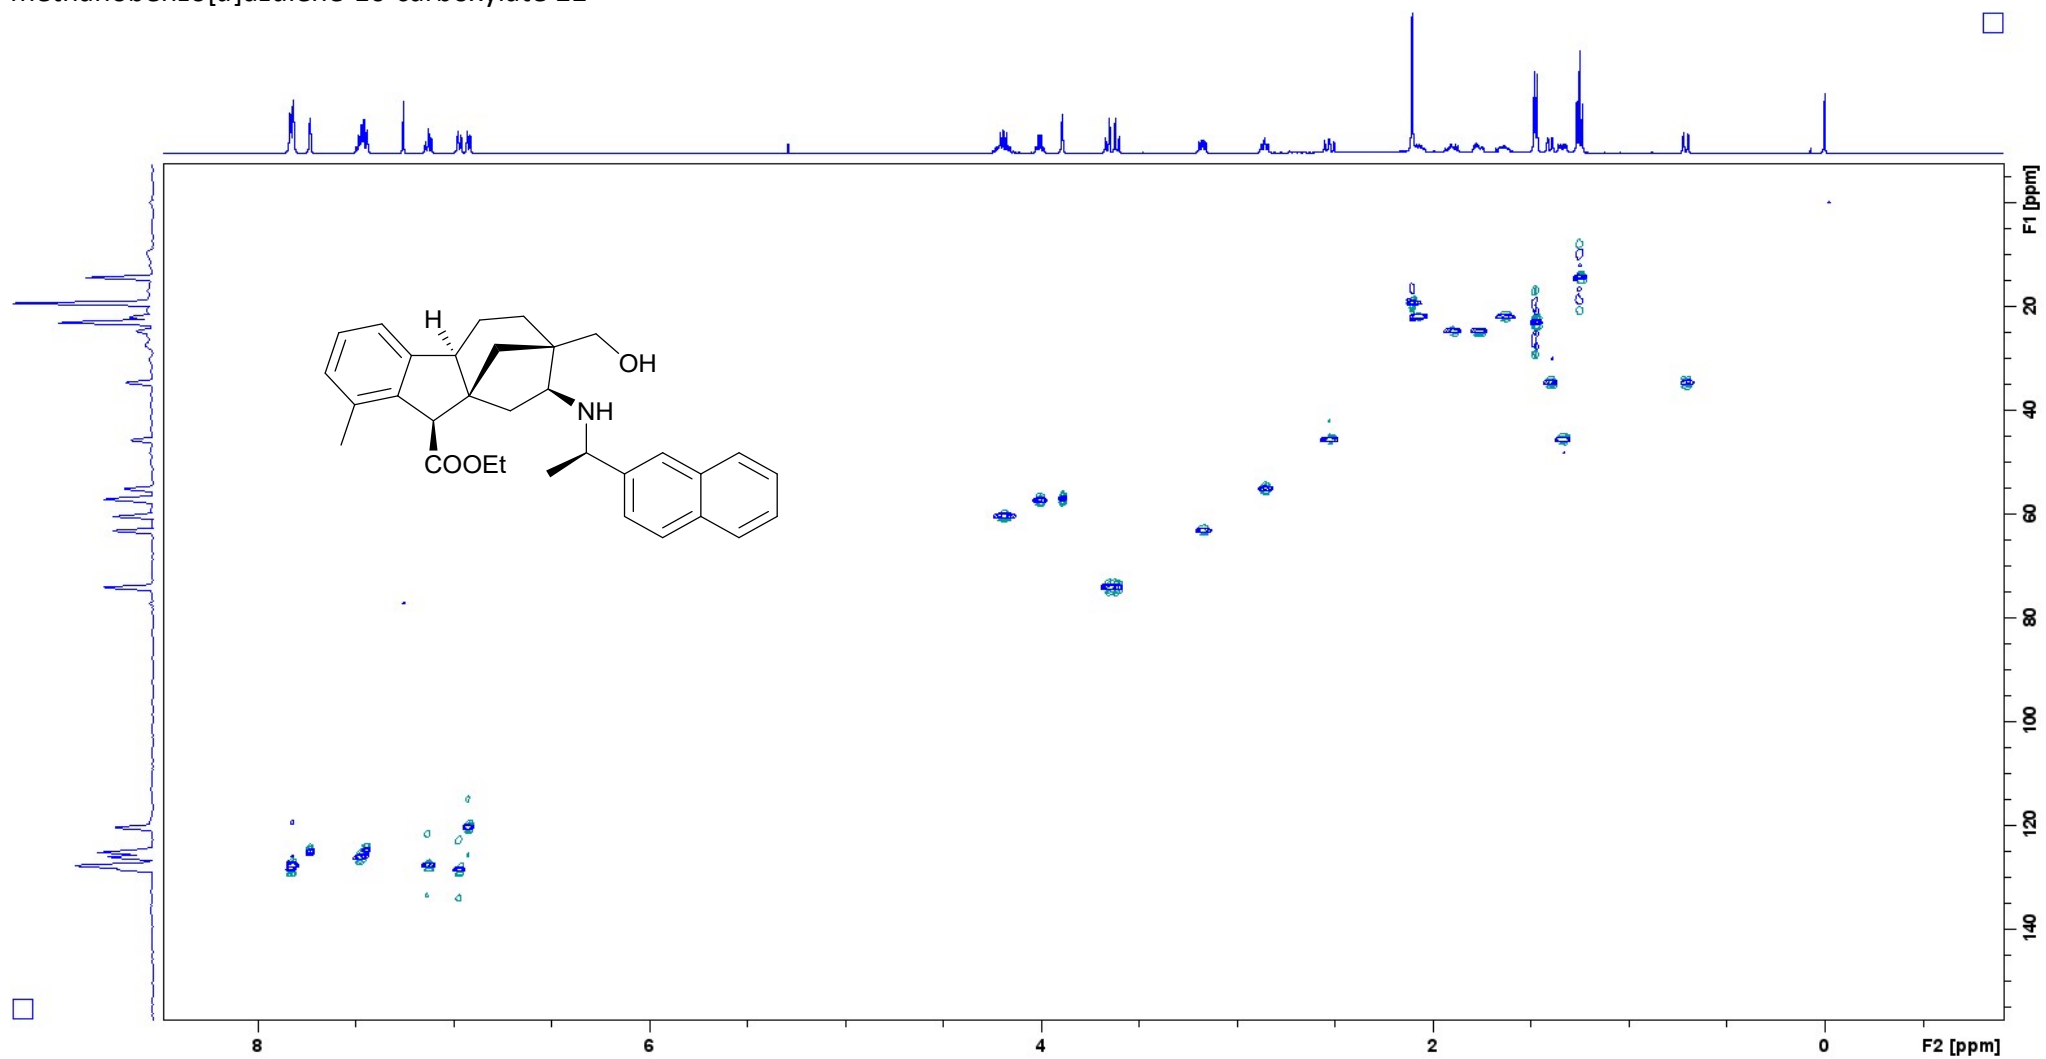

HMBC of ethyl (4*bS*,7*R*,8*S*,9*aS*,10*R*)-7-(hydroxymethyl)-1-methyl-8-(((*R*)-1-(naphthalen-2-yl)ethyl)amino)-4*b*,6,7,8,9,10-hexahydro-5*H*-7,9*a*-methanobenzo[*a*]azulene-10-carboxylate **11**

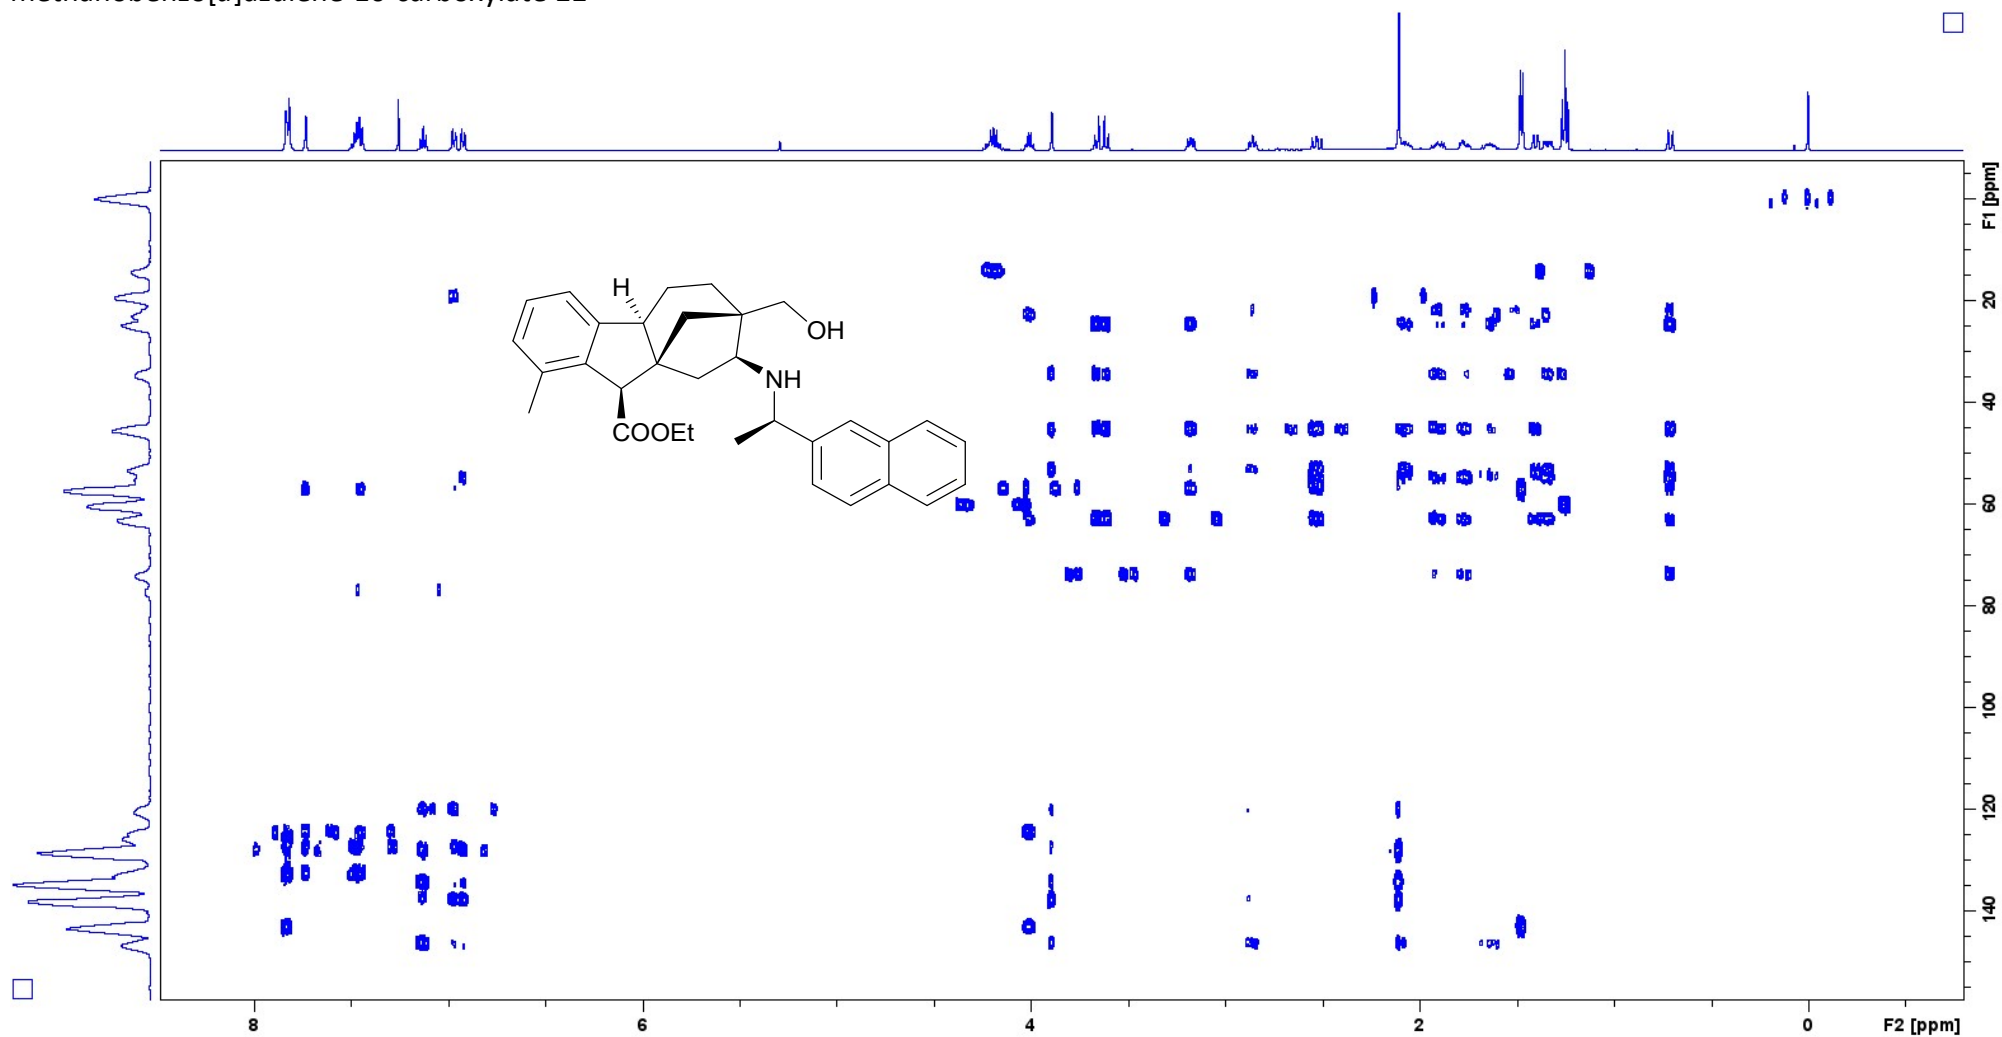

<sup>1</sup>H-NMR of ethyl (4*S*,7*R*,8*S*,9*aS*,10*R*)-7-(hydroxymethyl)-1-methyl-8-(((*S*)-1-(naphthalen-1-yl)ethyl)amino)-4*b*,6,7,8,9,10-hexahydro-5*H*-7,9*a*-methanobenzo[*a*]azulene-10-carboxylate **12**

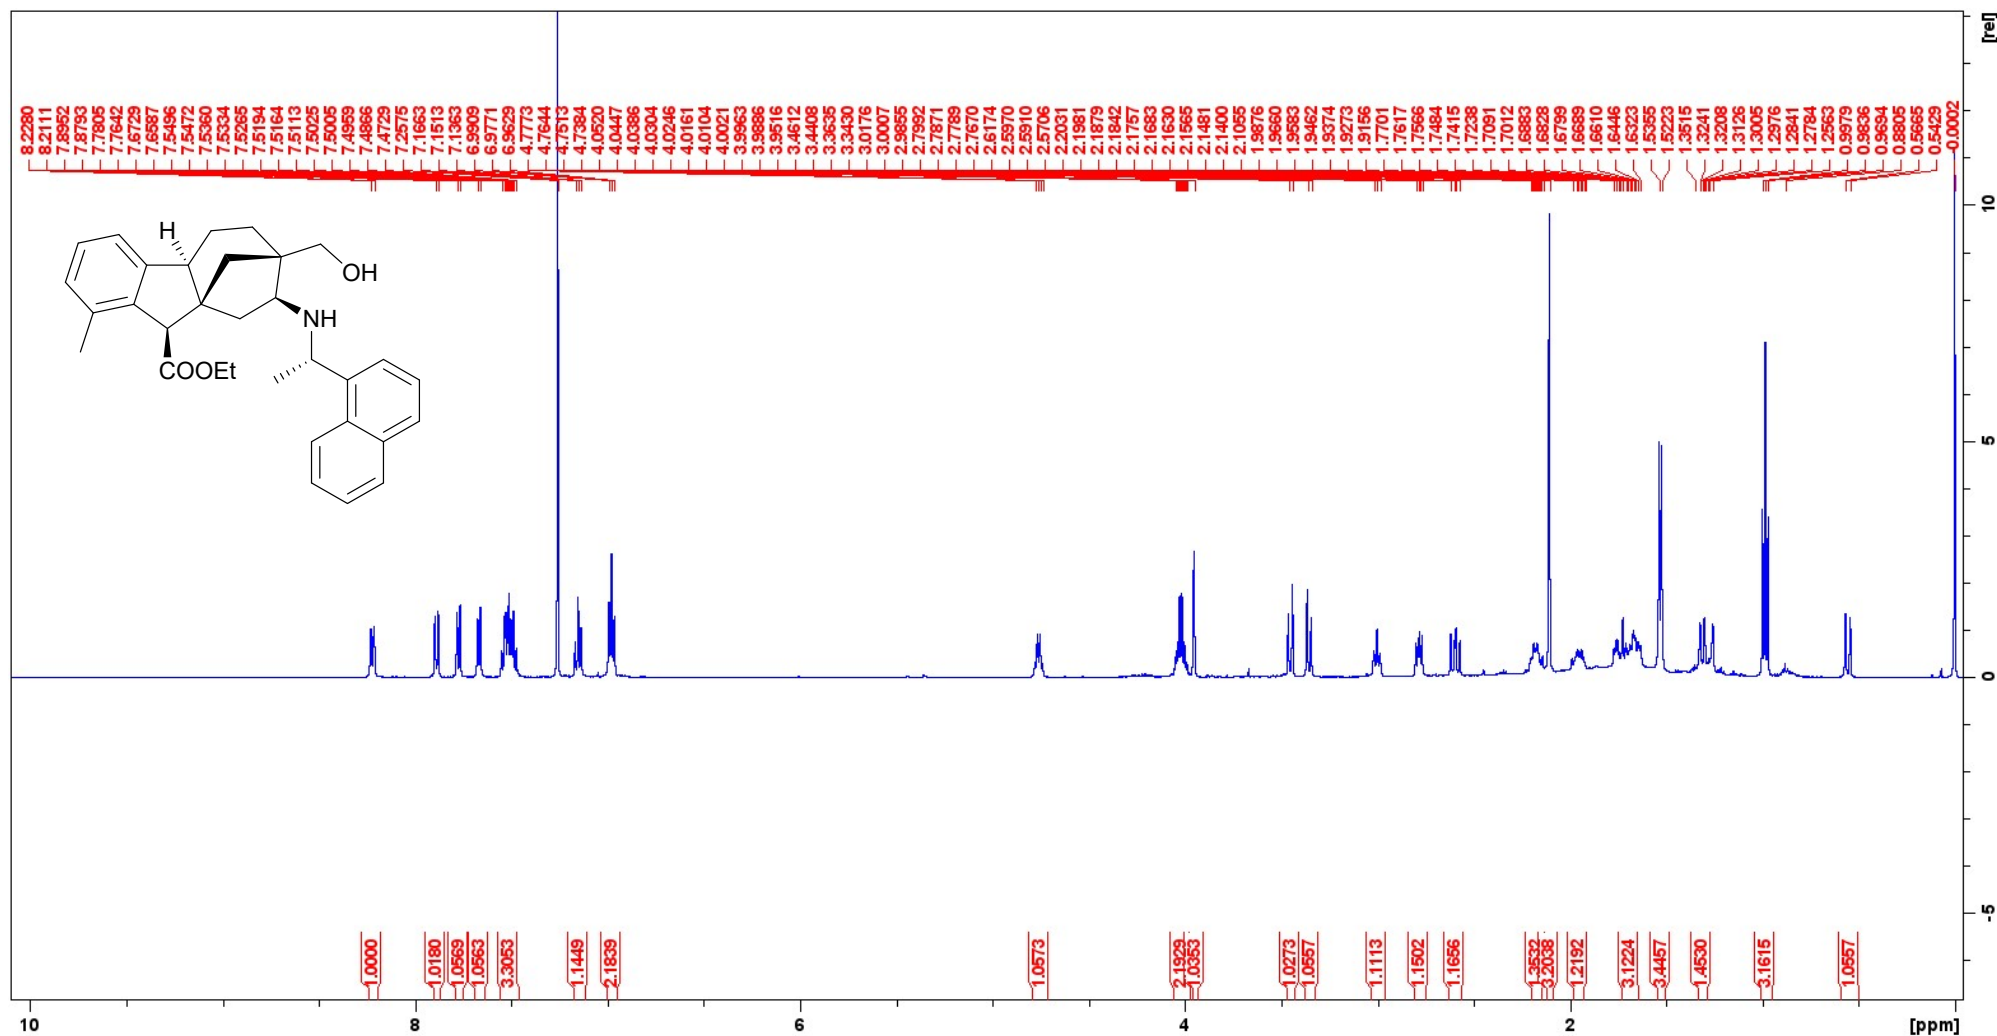

<sup>13</sup>C-NMR of ethyl (4*S*,7*R*,8*S*,9*aS*,10*R*)-7-(hydroxymethyl)-1-methyl-8-(((*S*)-1-(naphthalen-1-yl)ethyl)amino)-4*b*,6,7,8,9,10-hexahydro-5*H*-7,9*a*-methanobenzo[*a*]azulene-10-carboxylate **12**

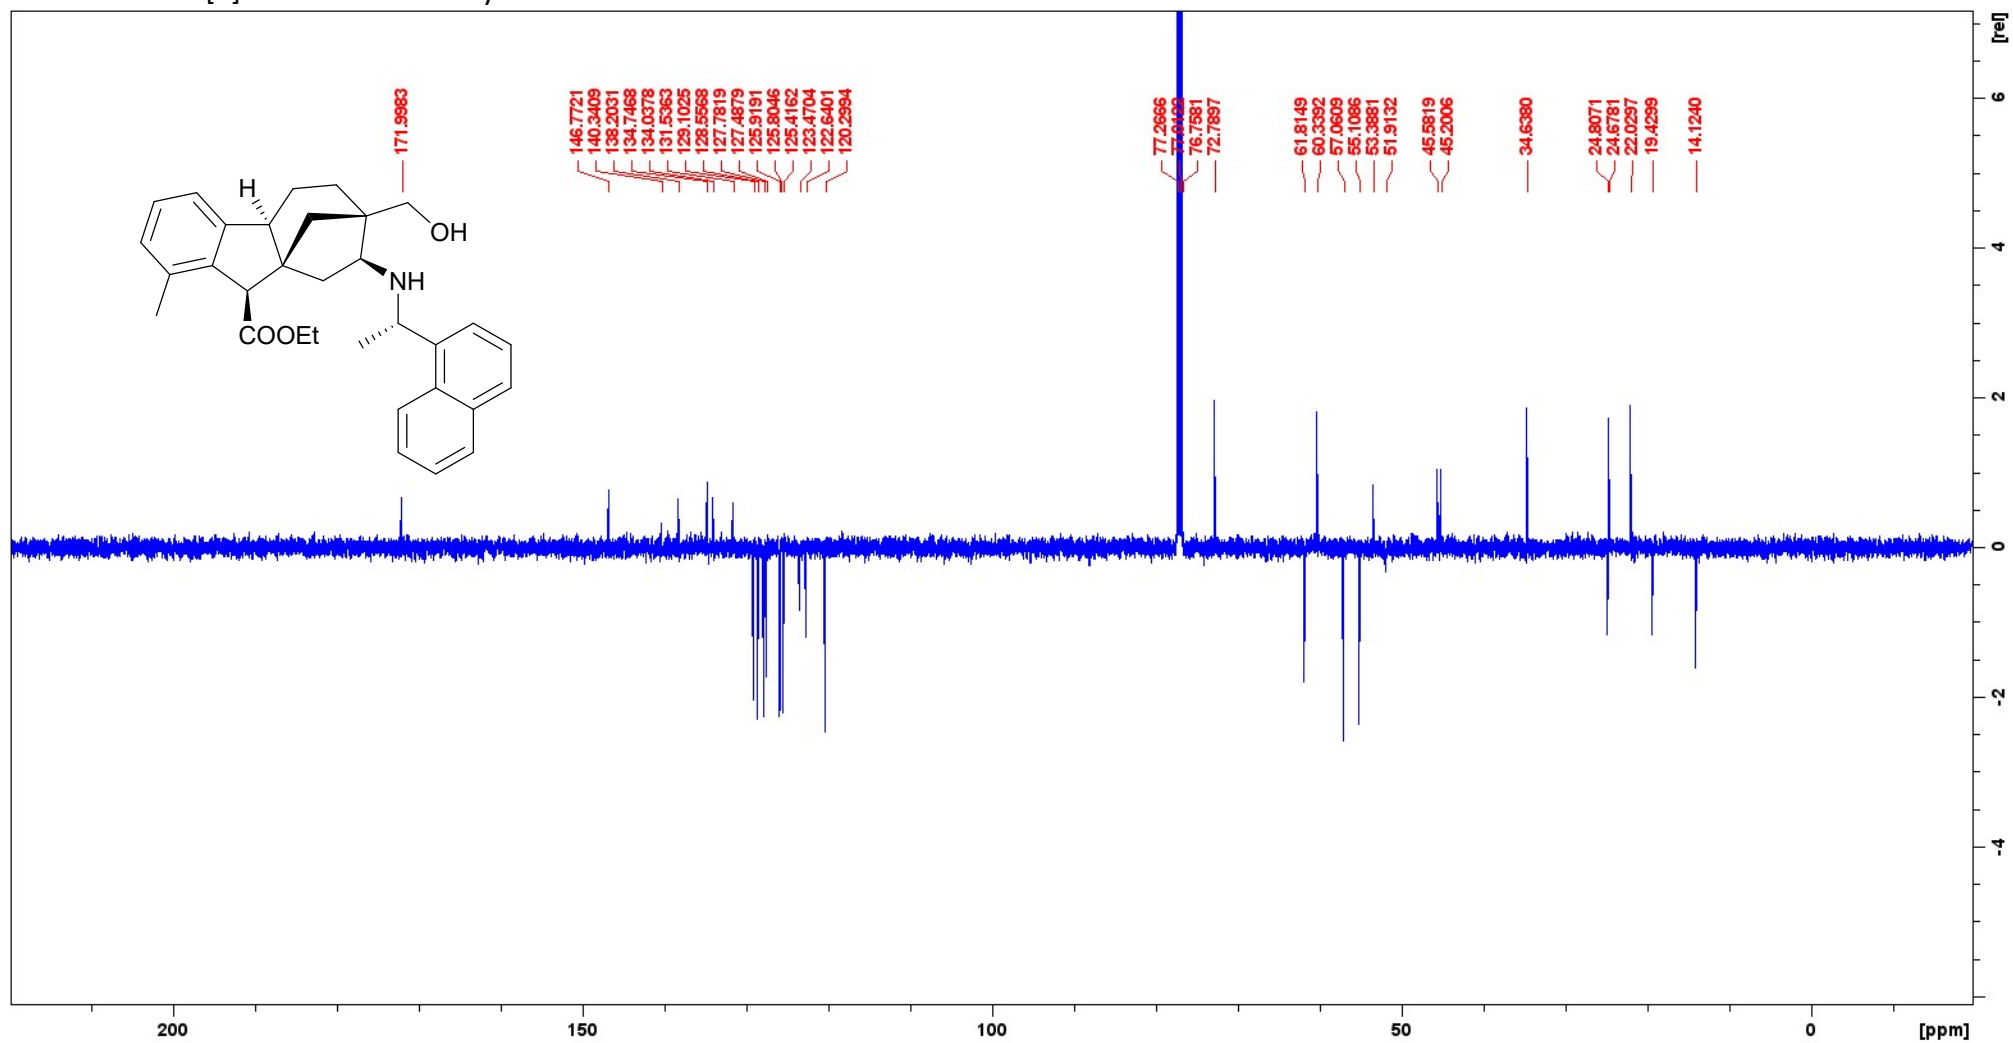

COSY of ethyl (4*S*,7*R*,8*S*,9*aS*,10*R*)-7-(hydroxymethyl)-1-methyl-8-(((*S*)-1-(naphthalen-1-yl)ethyl)amino)-4*b*,6,7,8,9,10-hexahydro-5*H*-7,9*a*-methanobenzo[*a*]azulene-10-carboxylate **12**

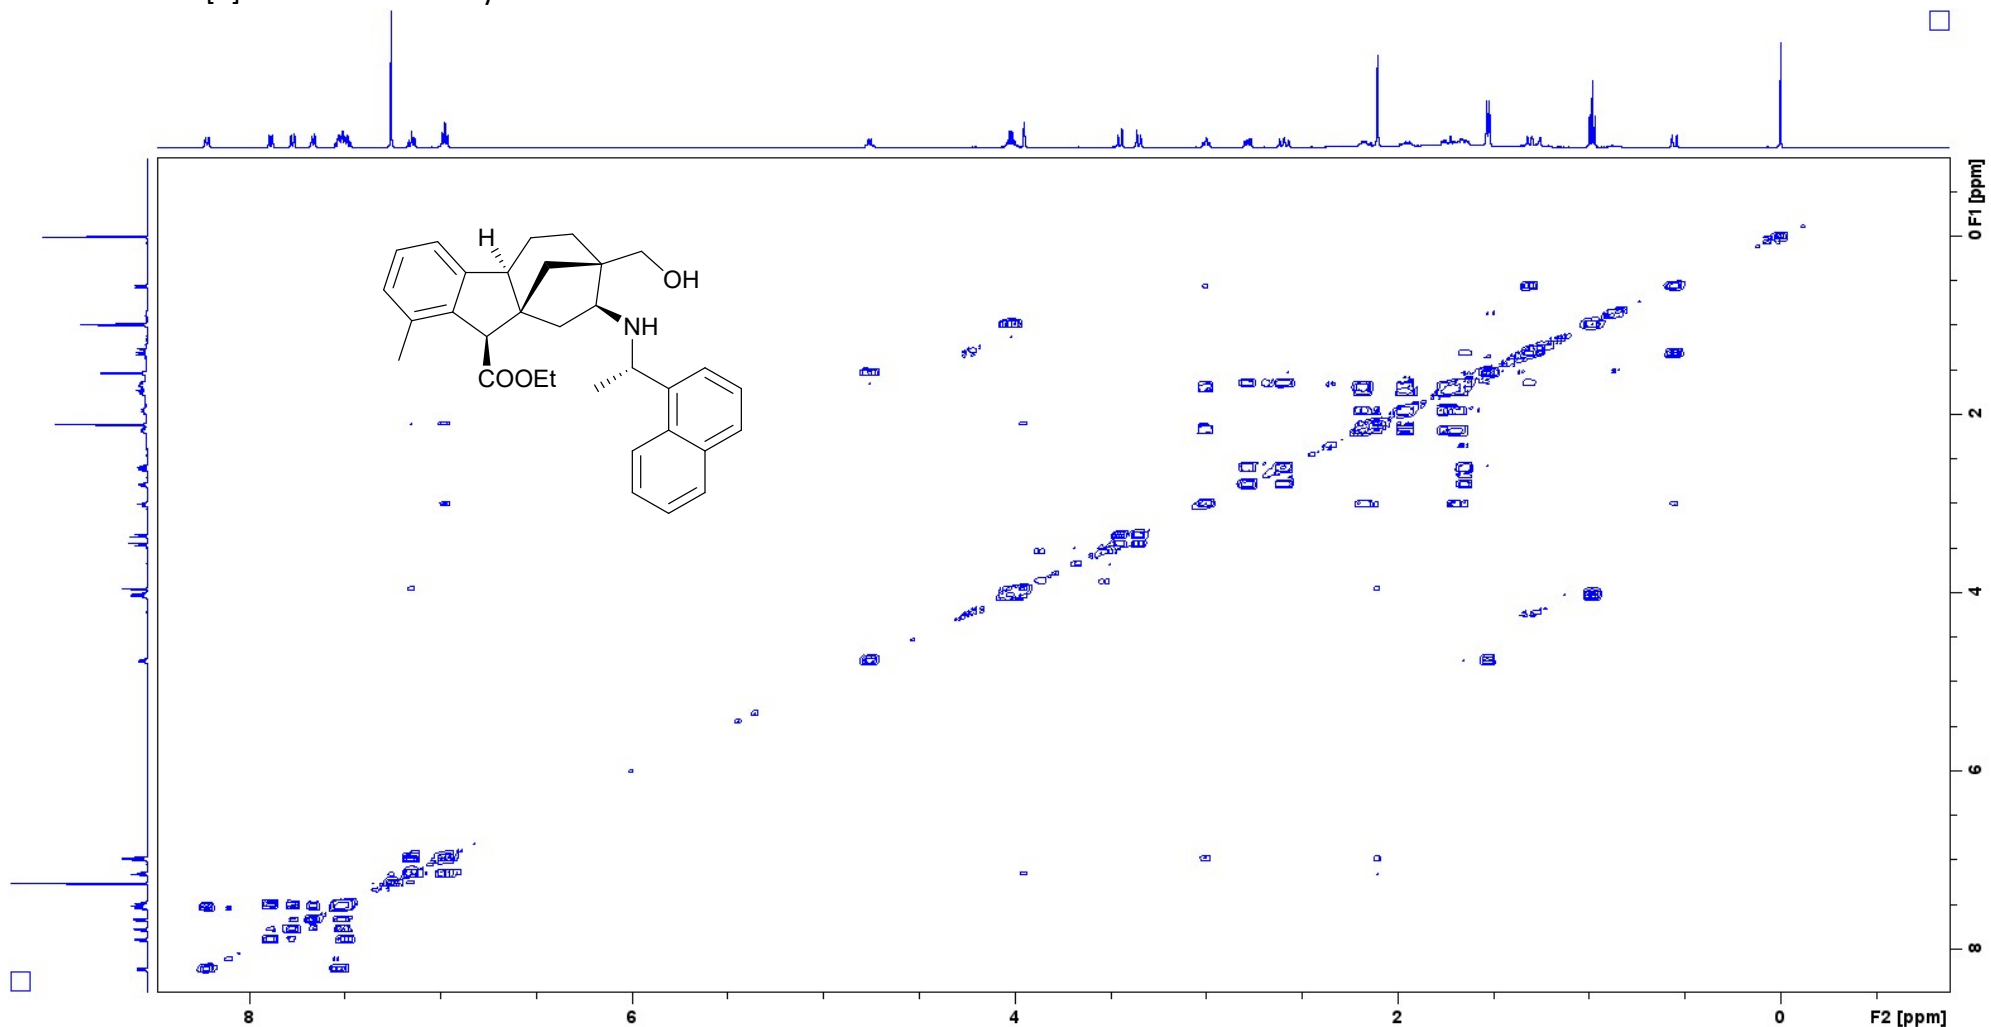

NOESY of ethyl (4*b**S*,7*R*,8*S*,9*a**S*,10*R*)-7-(hydroxymethyl)-1-methyl-8-(((*S*)-1-(naphthalen-1-yl)ethyl)amino)-4*b*,6,7,8,9,10-hexahydro-5*H*-7,9*a*-methanobenzo[*a*]azulene-10-carboxylate **12**

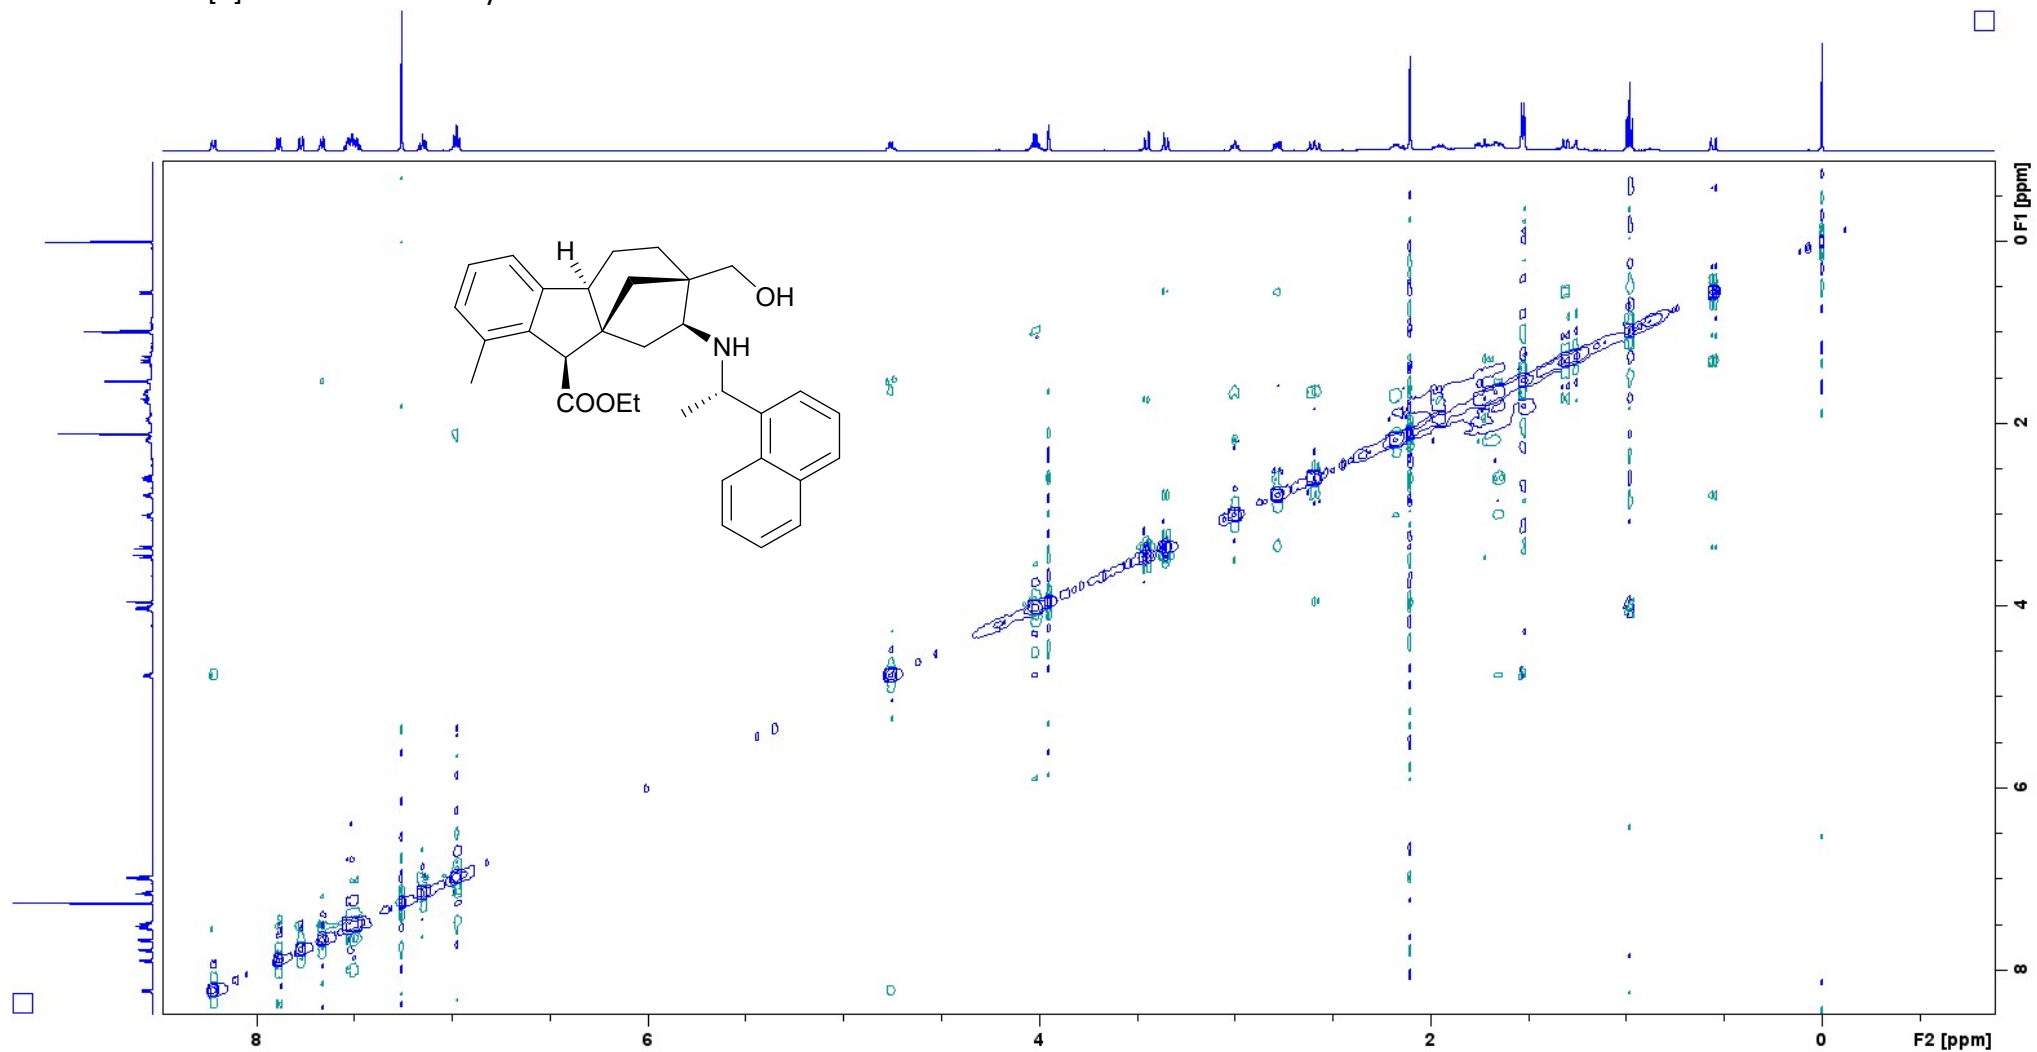

HSQC of ethyl (4*S*,7*R*,8*S*,9*aS*,10*R*)-7-(hydroxymethyl)-1-methyl-8-(((*S*)-1-(naphthalen-1-yl)ethyl)amino)-4*b*,6,7,8,9,10-hexahydro-5*H*-7,9*a*-methanobenzo[*a*]azulene-10-carboxylate **12**

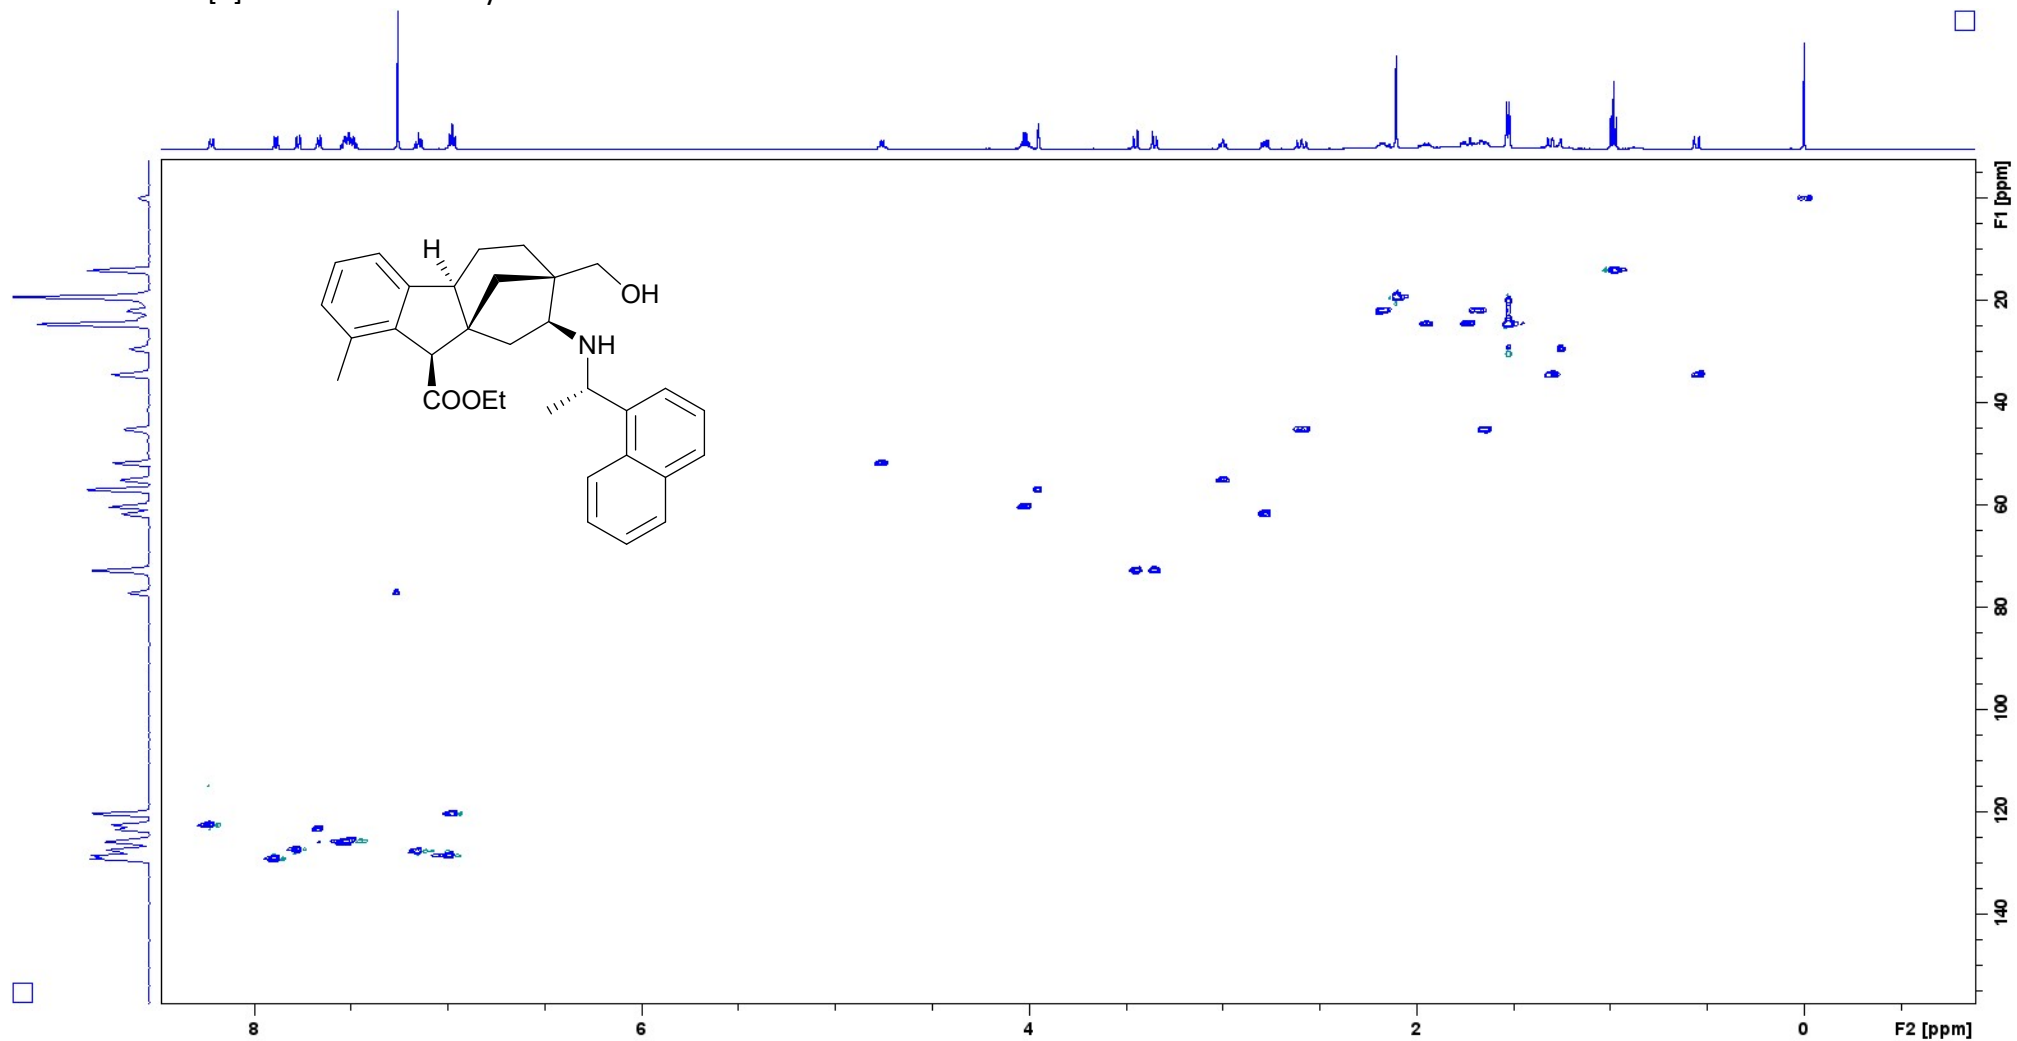



HMBC of ethyl (4*S*,7*R*,8*S*,9*aS*,10*R*)-7-(hydroxymethyl)-1-methyl-8-(((*S*)-1-(naphthalen-1-yl)ethyl)amino)-4*b*,6,7,8,9,10-hexahydro-5*H*-7,9a-methanobenzo[*a*]azulene-10-carboxylate **12**

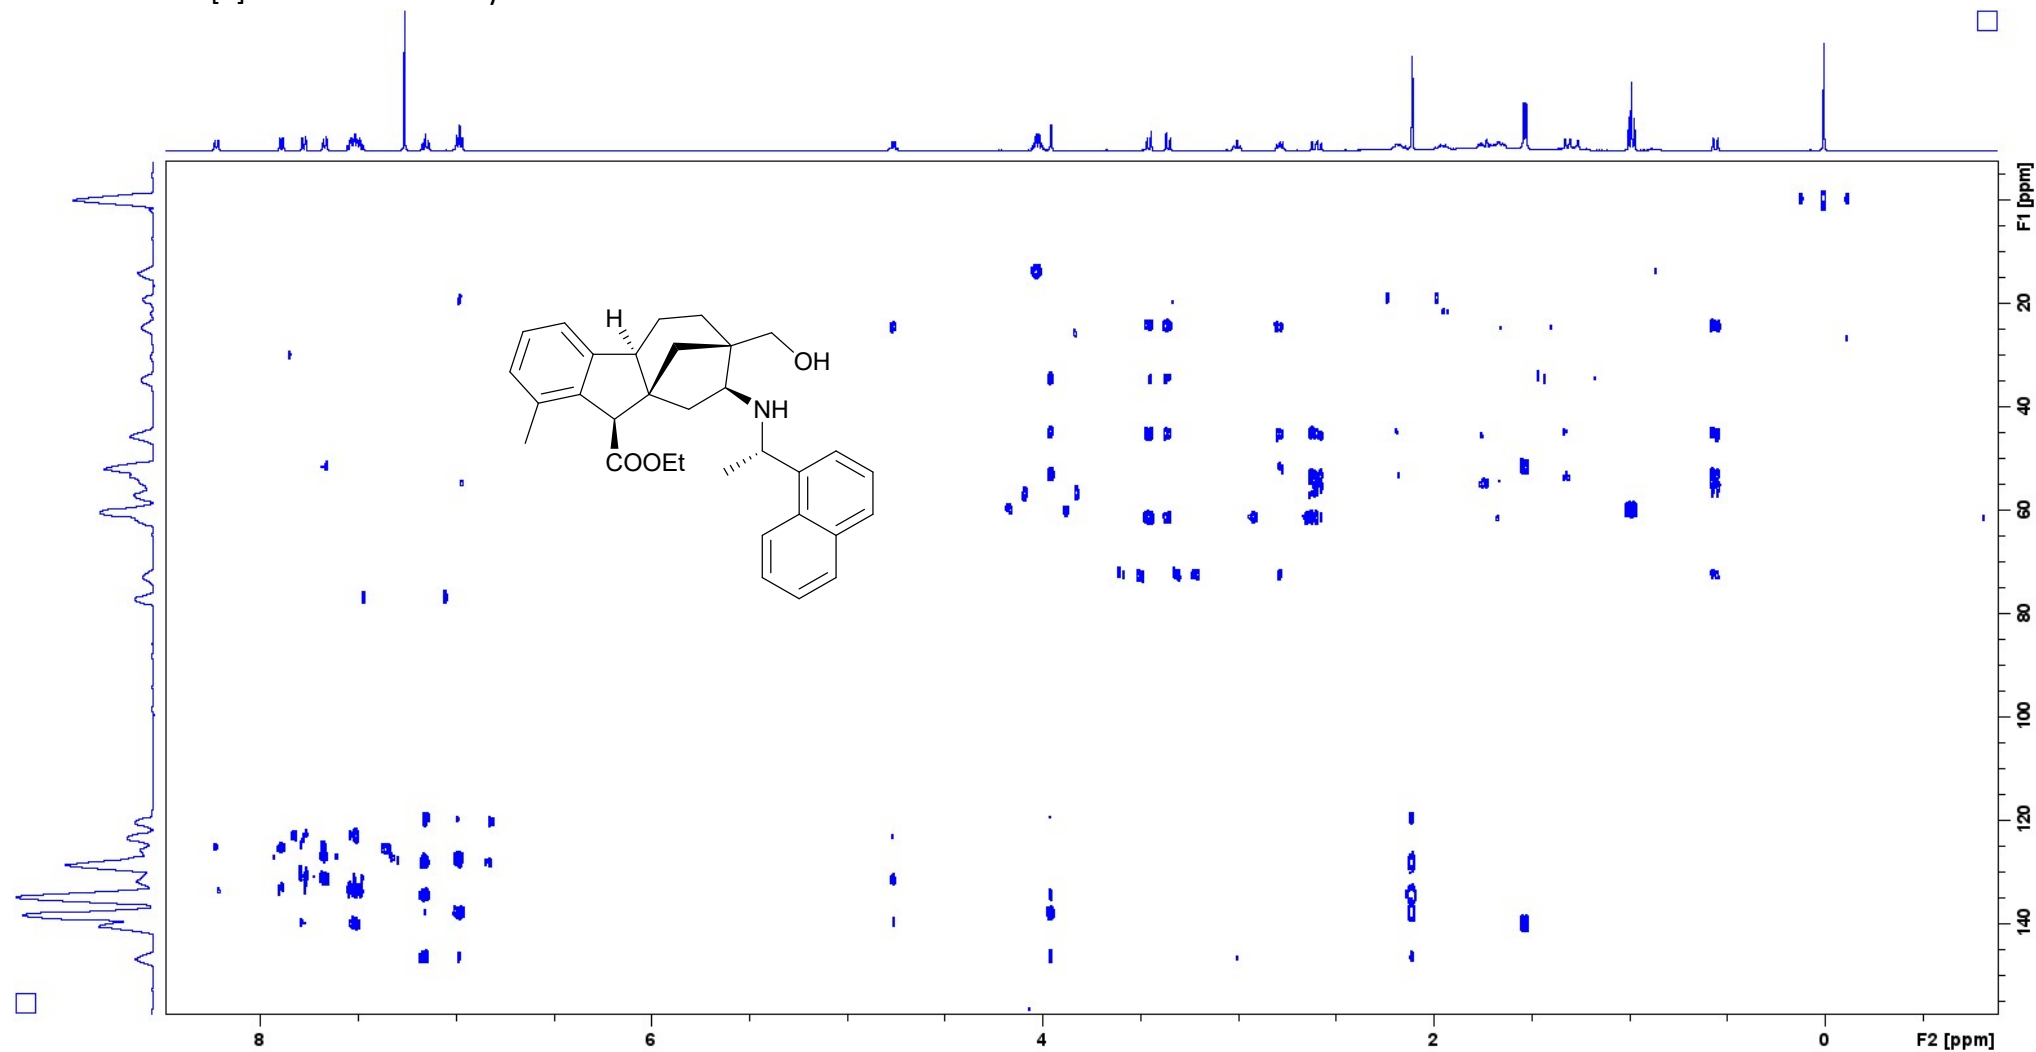

<sup>1</sup>H-NMR of ethyl (4*S*,7*R*,8*S*,9*a*,10*R*)-7-(hydroxymethyl)-1-methyl-8-(((*R*)-1-(naphthalen-1-yl)ethyl)amino)-4*b*,6,7,8,9,10-hexahydro-5*H*-7,9*a*-methanobenzo[*a*]azulene-10-carboxylate **13**

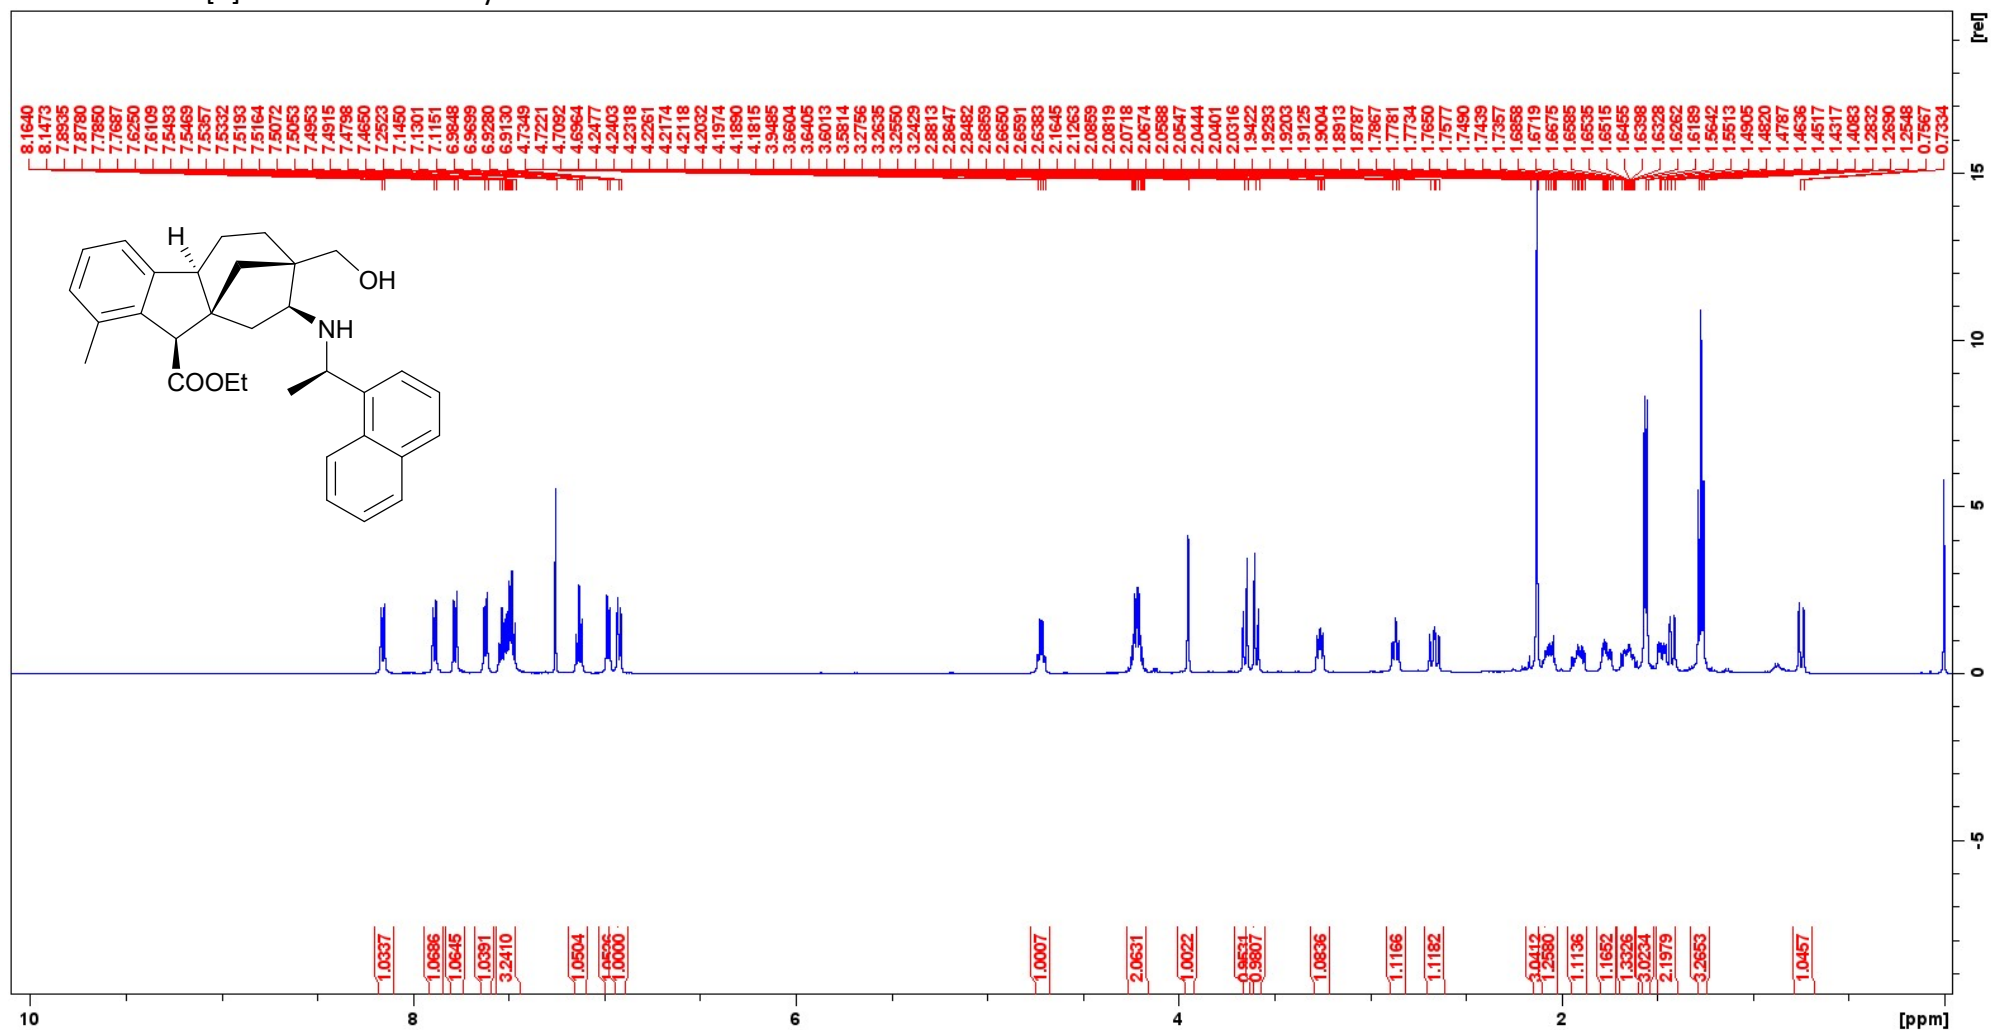

<sup>13</sup>C-NMR of ethyl (4*bS*,7*R*,8*S*,9*aS*,10*R*)-7-(hydroxymethyl)-1-methyl-8-(((*R*)-1-(naphthalen-1-yl)ethyl)amino)-4*b*,6,7,8,9,10-hexahydro-5*H*-7,9*a*-methanobenzo[*a*]azulene-10-carboxylate **13**

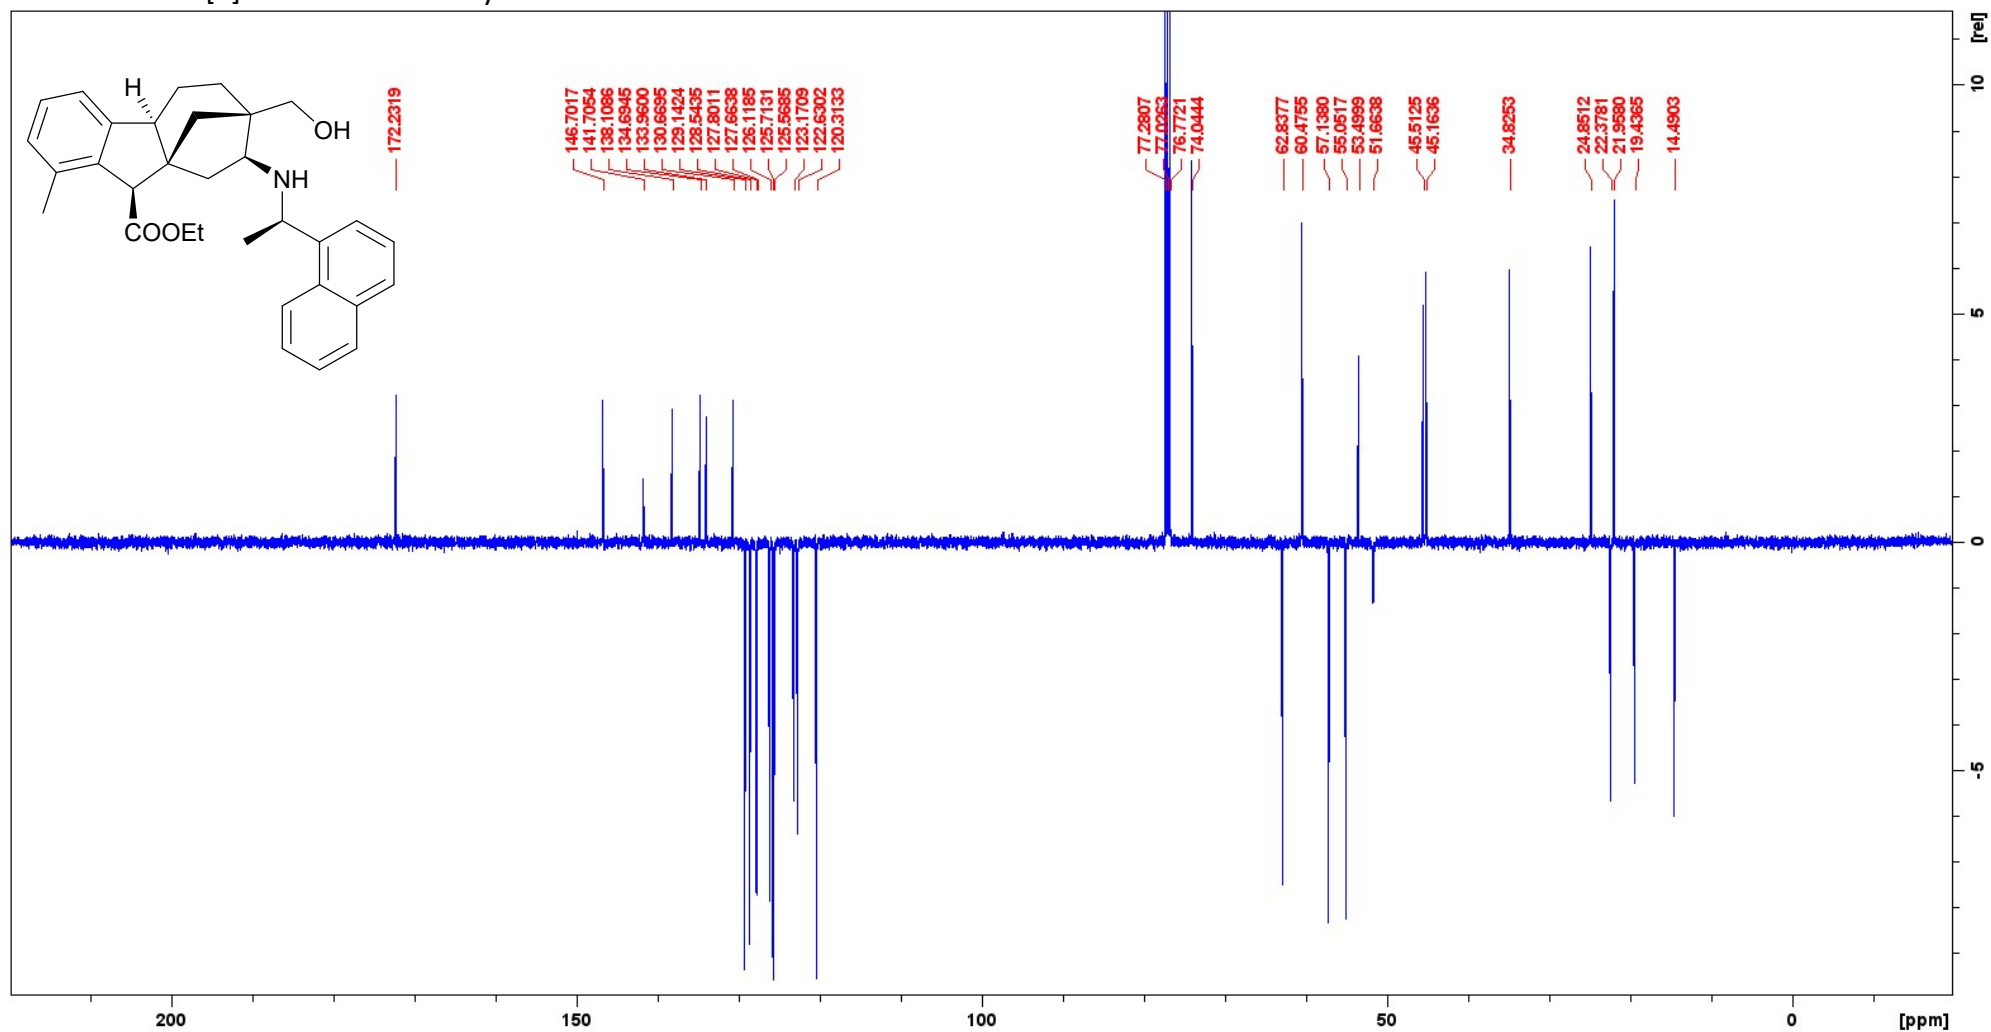

COSY of ethyl (4*bS*,7*R*,8*S*,9*aS*,10*R*)-7-(hydroxymethyl)-1-methyl-8-(((*R*)-1-(naphthalen-1-yl)ethyl)amino)-4*b*,6,7,8,9,10-hexahydro-5*H*-7,9*a*-methanobenzo[*a*]azulene-10-carboxylate **13**

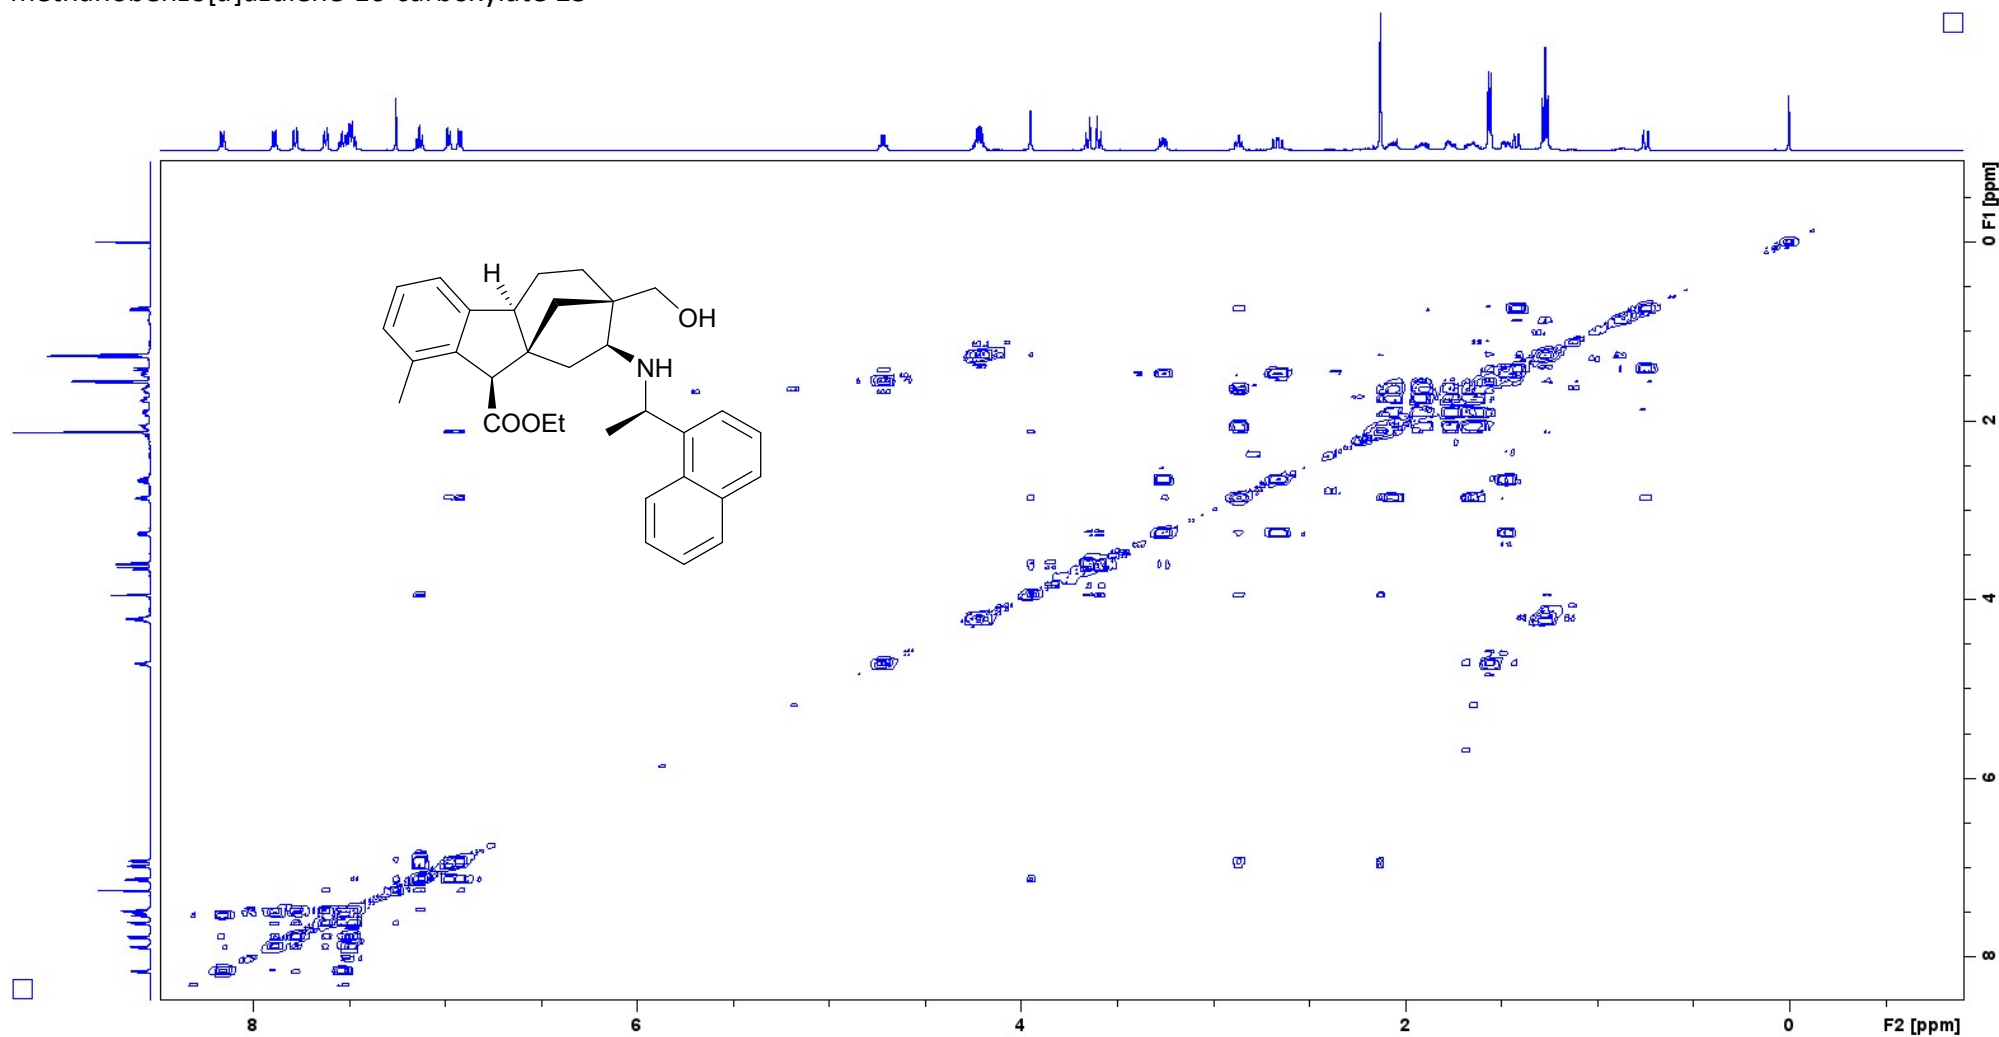

NOESY of ethyl (4*b**S*,7*R*,8*S*,9*a**S*,10*R*)-7-(hydroxymethyl)-1-methyl-8-(((*R*)-1-(naphthalen-1-yl)ethyl)amino)-4*b*,6,7,8,9,10-hexahydro-5*H*-7,9*a*-methanobenzo[*a*]azulene-10-carboxylate **13**

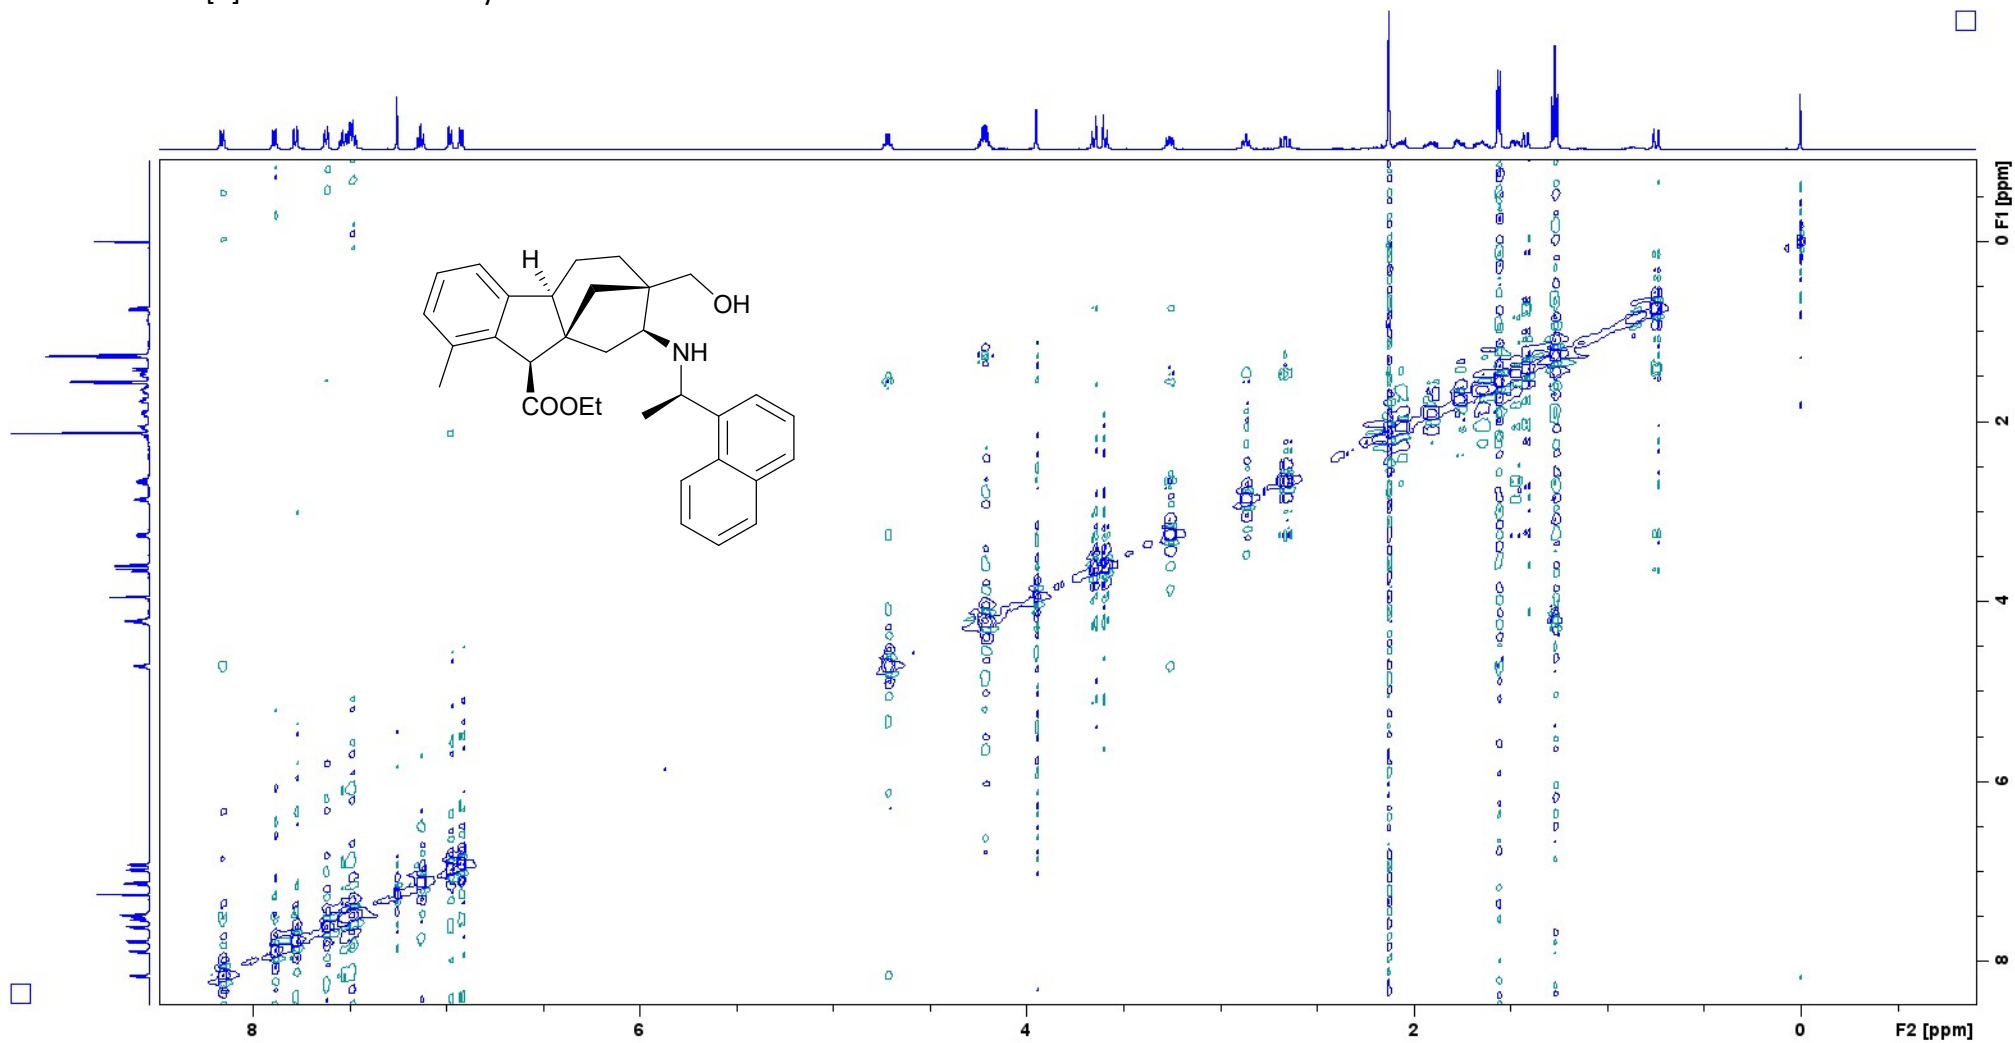

HSQC of ethyl (4*bS*,7*R*,8*S*,9*aS*,10*R*)-7-(hydroxymethyl)-1-methyl-8-(((*R*)-1-(naphthalen-1-yl)ethyl)amino)-4*b*,6,7,8,9,10-hexahydro-5*H*-7,9*a*-methanobenzo[*a*]azulene-10-carboxylate **13**

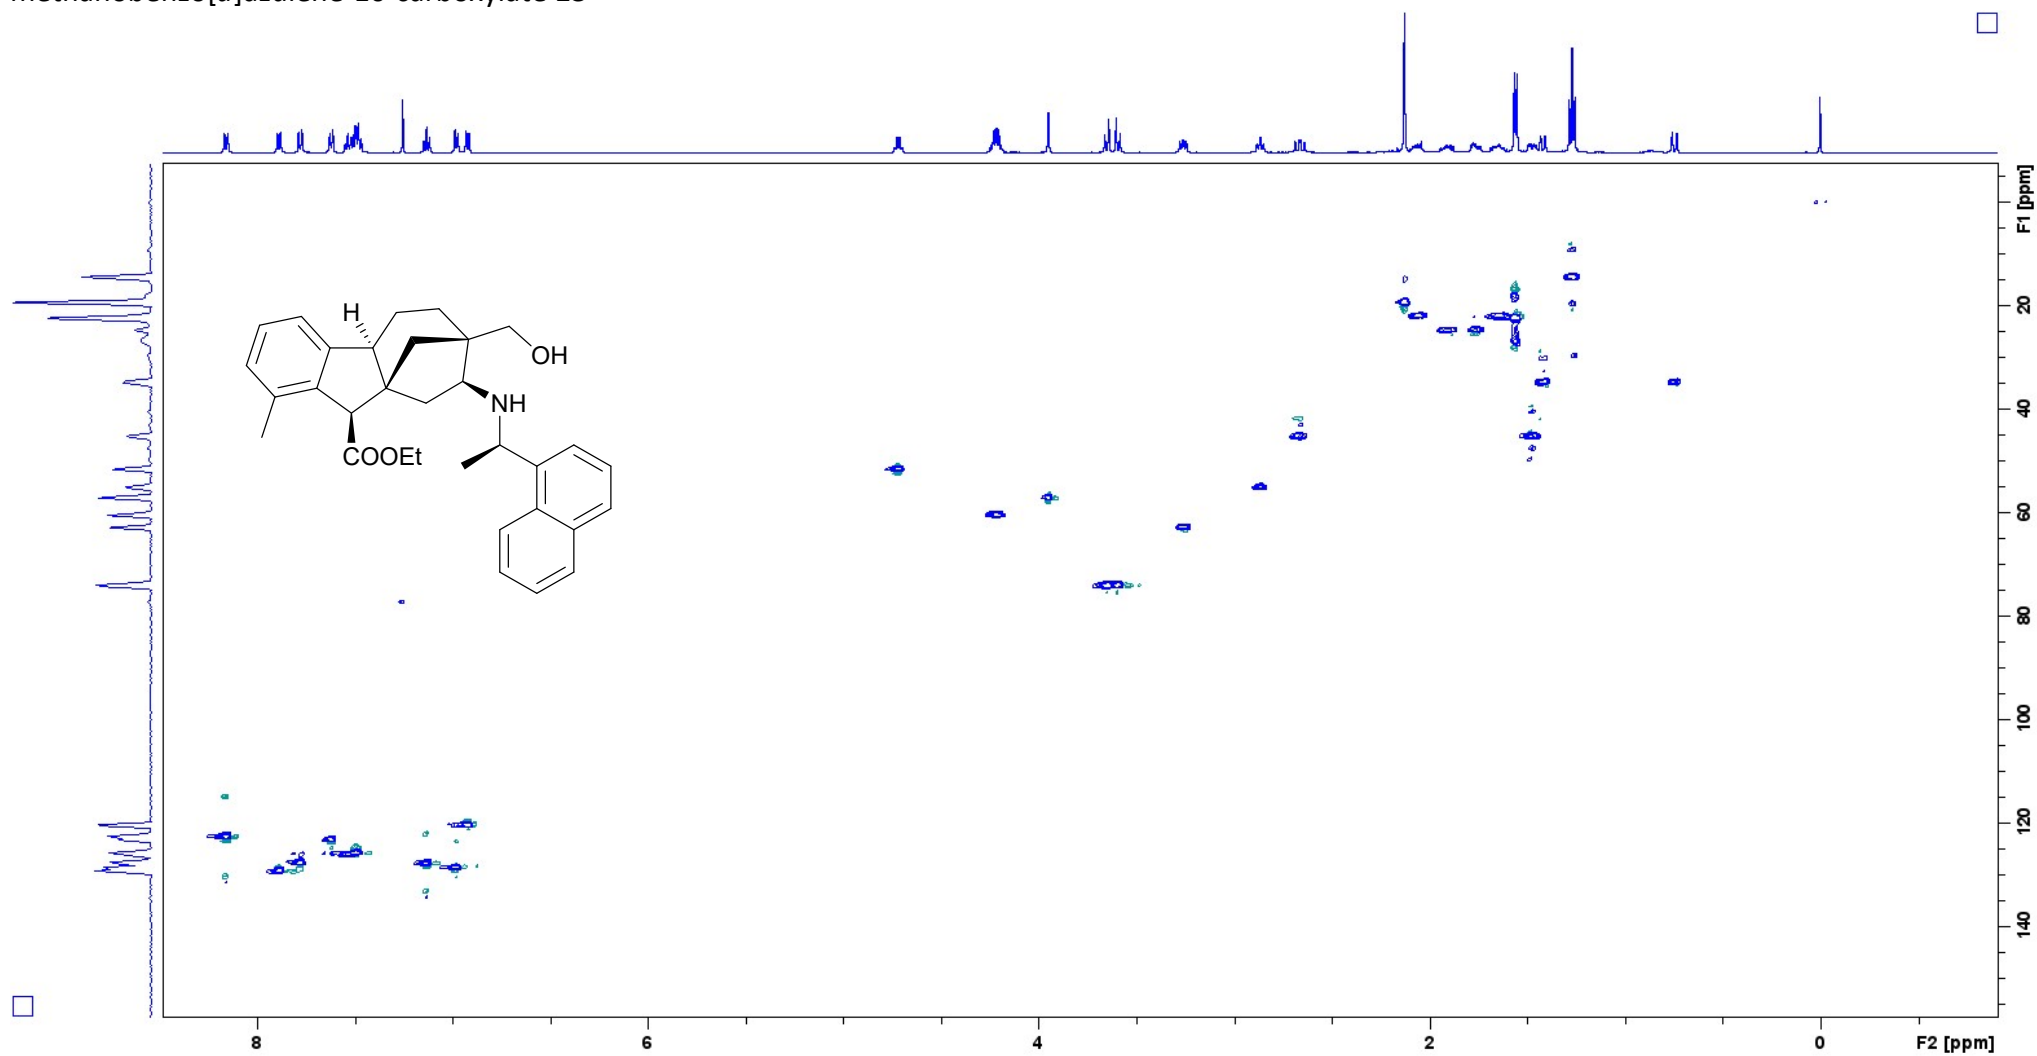

HMBC of ethyl (4*bS*,7*R*,8*S*,9*aS*,10*R*)-7-(hydroxymethyl)-1-methyl-8-(((*R*)-1-(naphthalen-1-yl)ethyl)amino)-4*b*,6,7,8,9,10-hexahydro-5*H*-7,9*a*-methanobenzo[*a*]azulene-10-carboxylate **13**

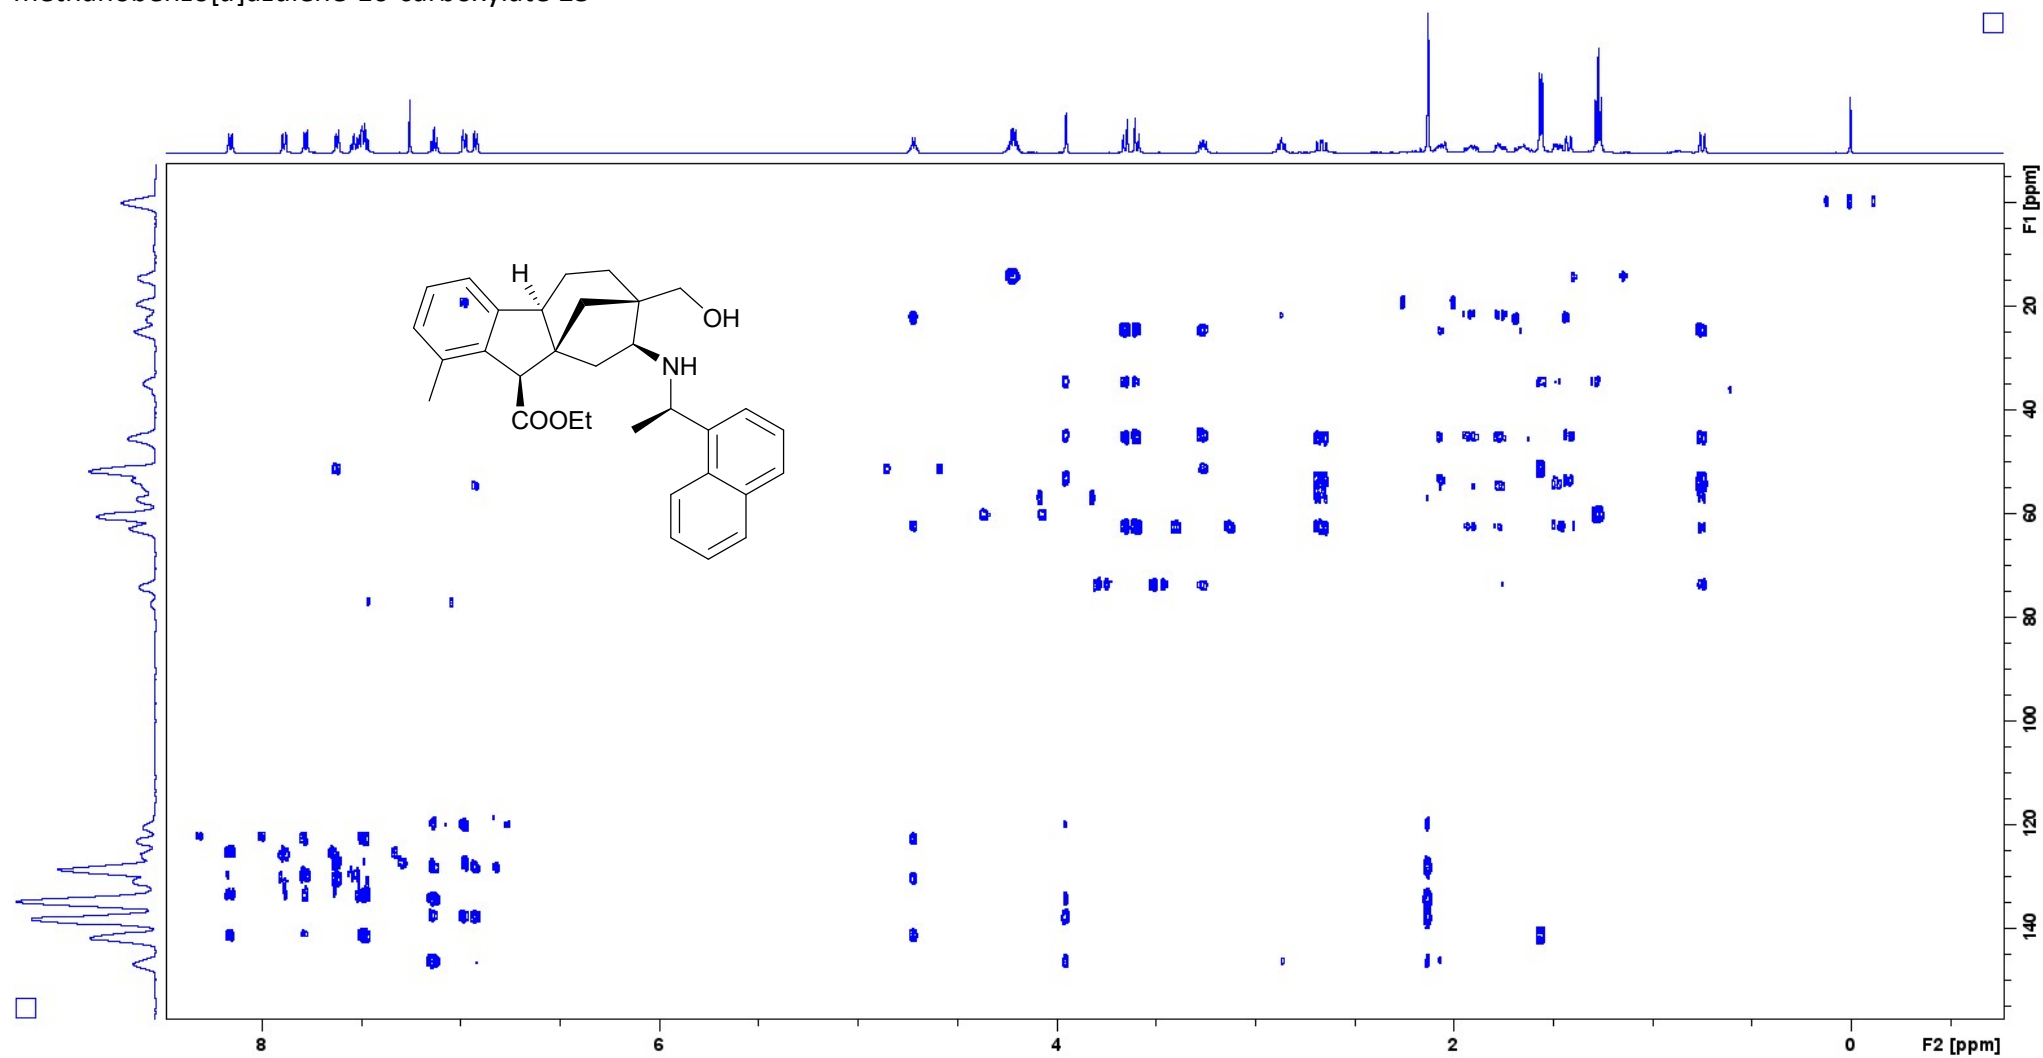

<sup>1</sup>H-NMR of ethyl (4*bS*,7*R*,8*S*,9*aS*,10*R*)-8-((4-fluorobenzyl)amino)-7-(hydroxymethyl)-1-methyl-4*b*,6,7,8,9,10-hexahydro-5*H*-7,9*a*-methanobenzo[*a*]azulene-10-carboxylate **14**

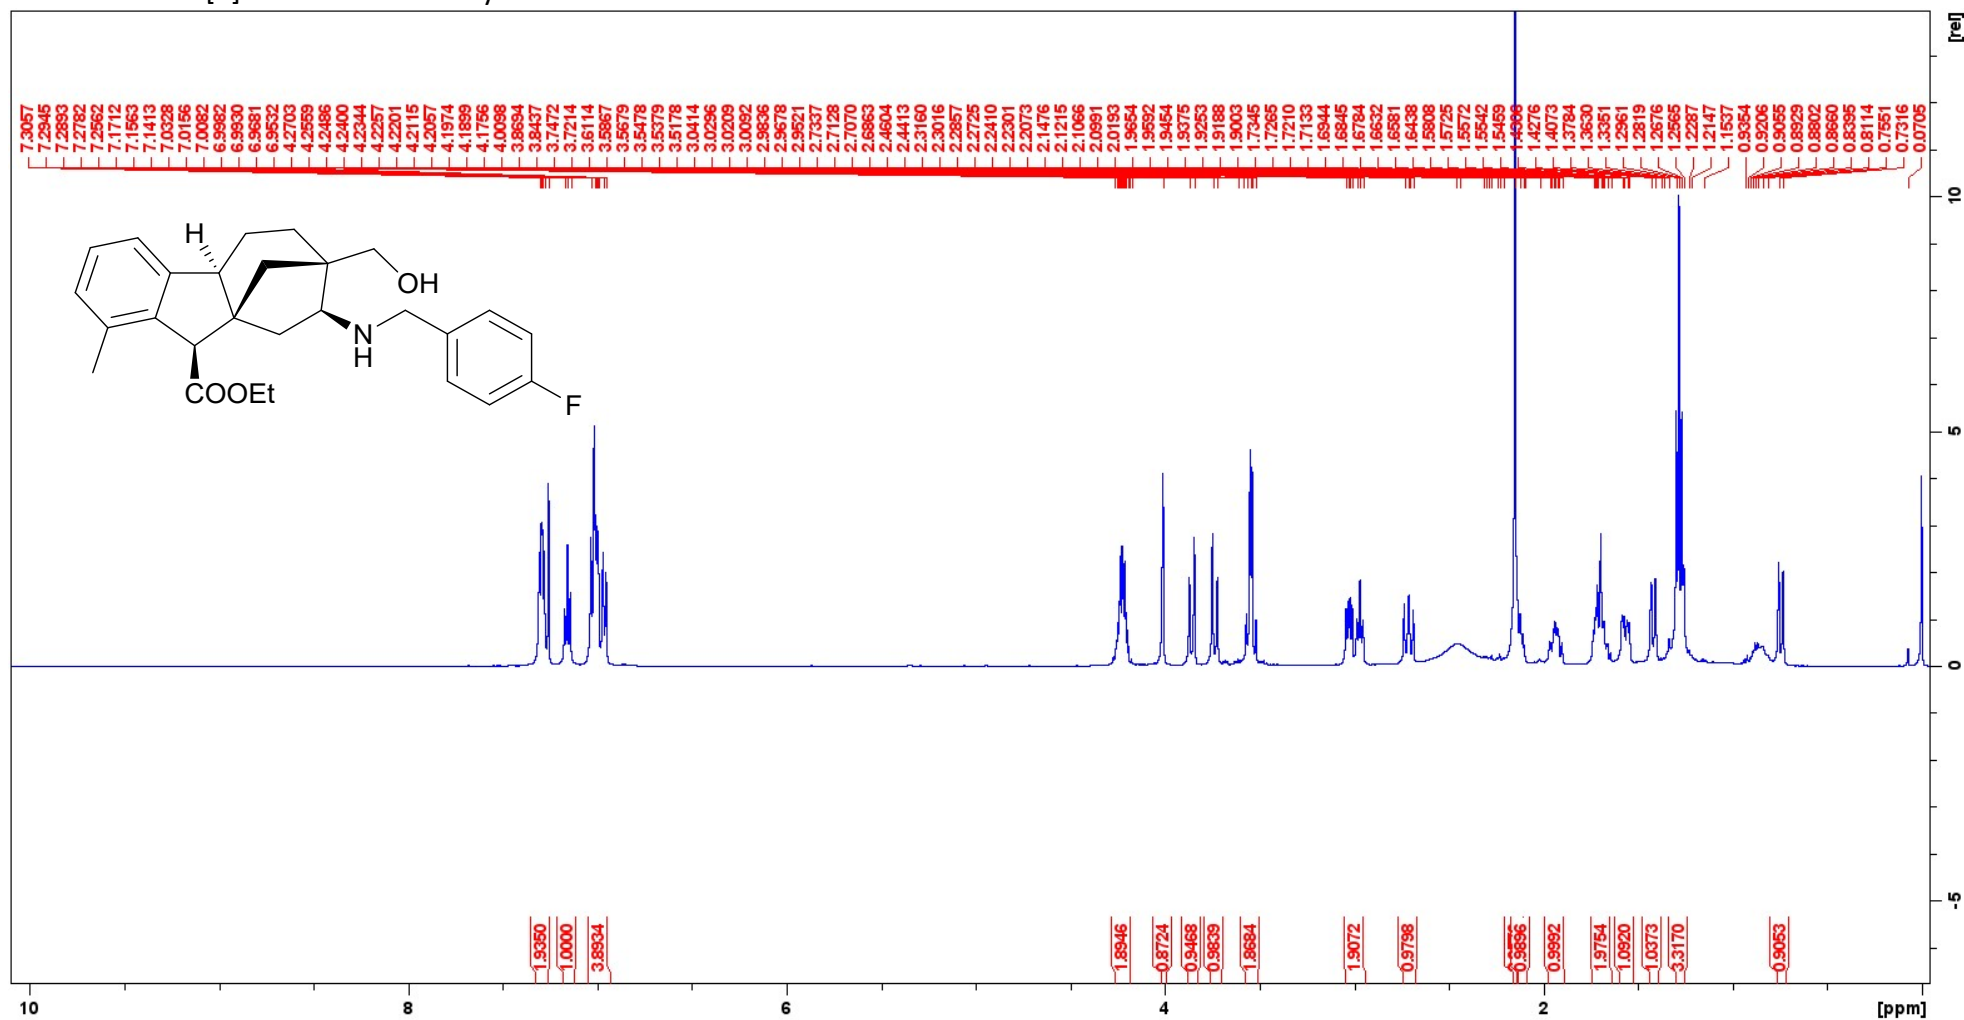



<sup>13</sup>C-NMR of ethyl (4*bS*,7*R*,8*S*,9*aS*,10*R*)-8-((4-fluorobenzyl)amino)-7-(hydroxymethyl)-1-methyl-4*b*,6,7,8,9,10-hexahydro-5*H*-7,9*a*-methanobenzo[*a*]azulene-10-carboxylate **14**

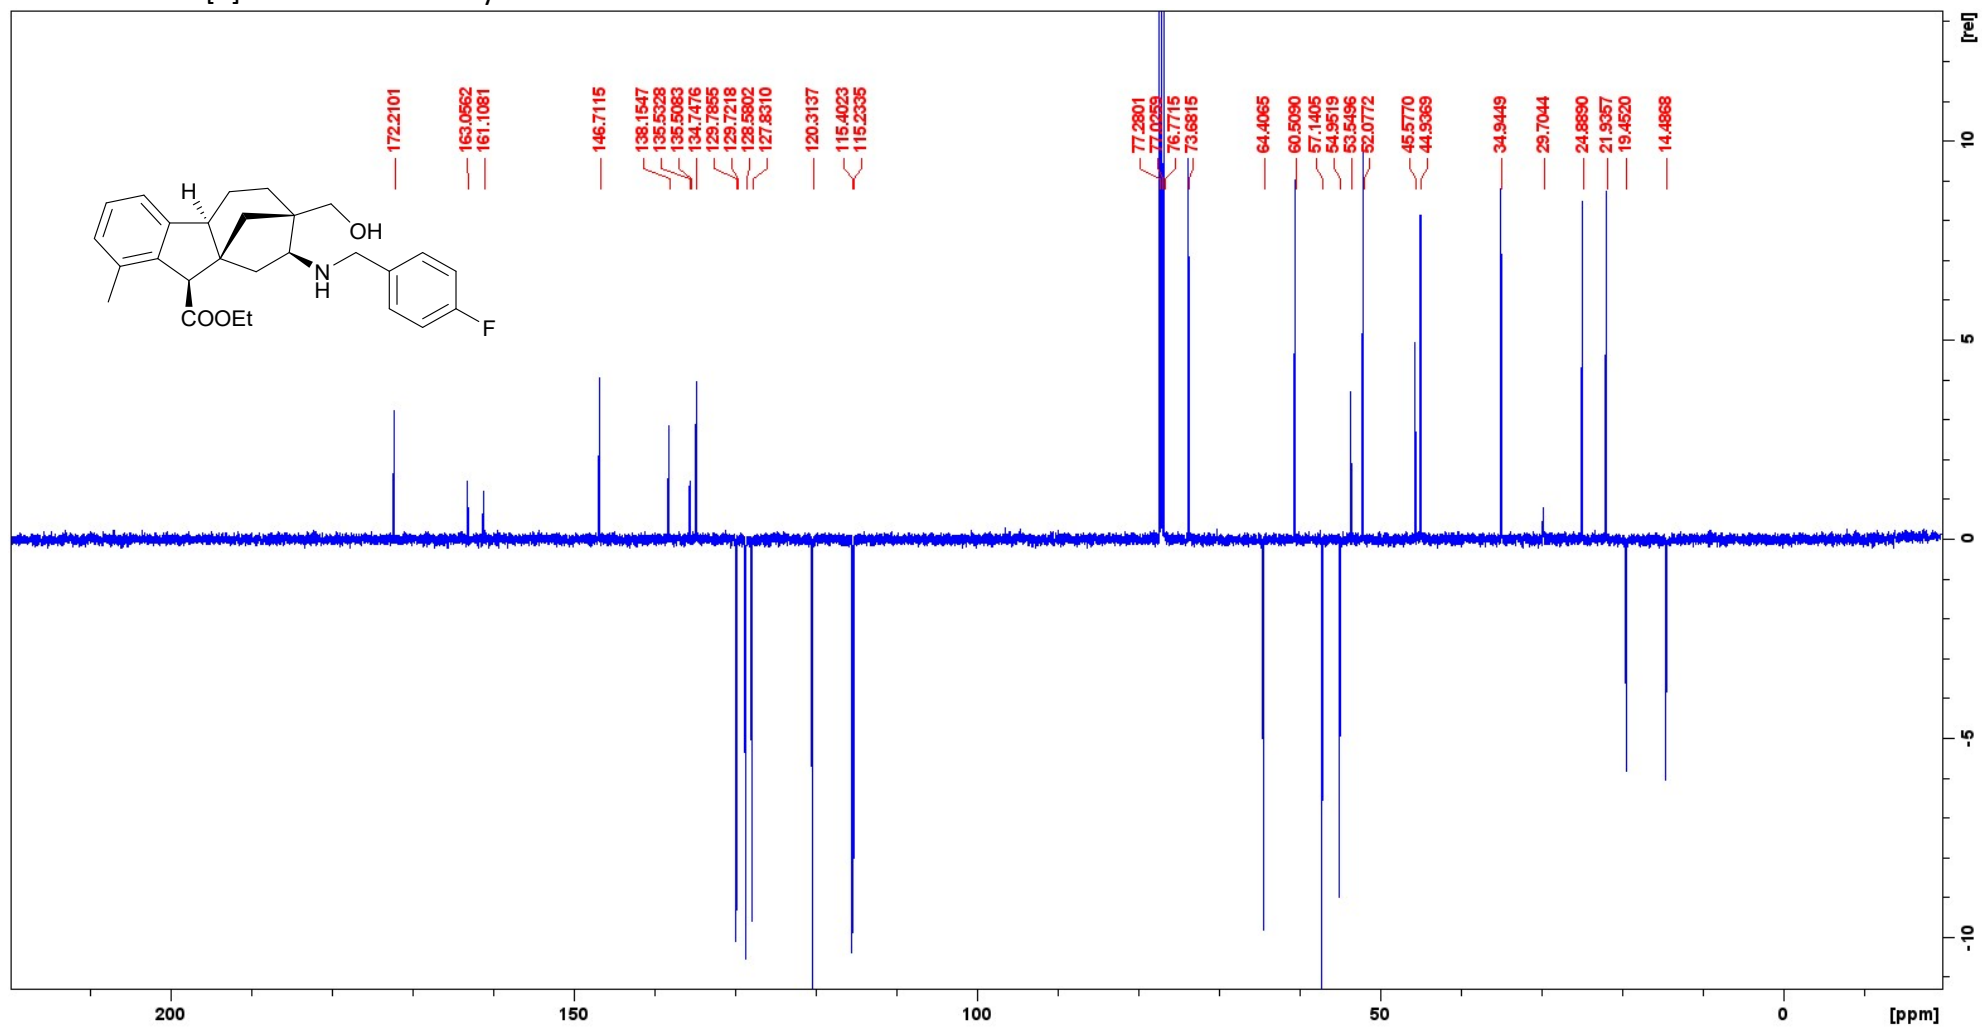

COSY of ethyl (4*b**S*,7*R*,8*S*,9*aS*,10*R*)-8-((4-fluorobenzyl)amino)-7-(hydroxymethyl)-1-methyl-4*b*,6,7,8,9,10-hexahydro-5*H*-7,9*a*-methanobenzo[*a*]azulene-10-carboxylate **14**

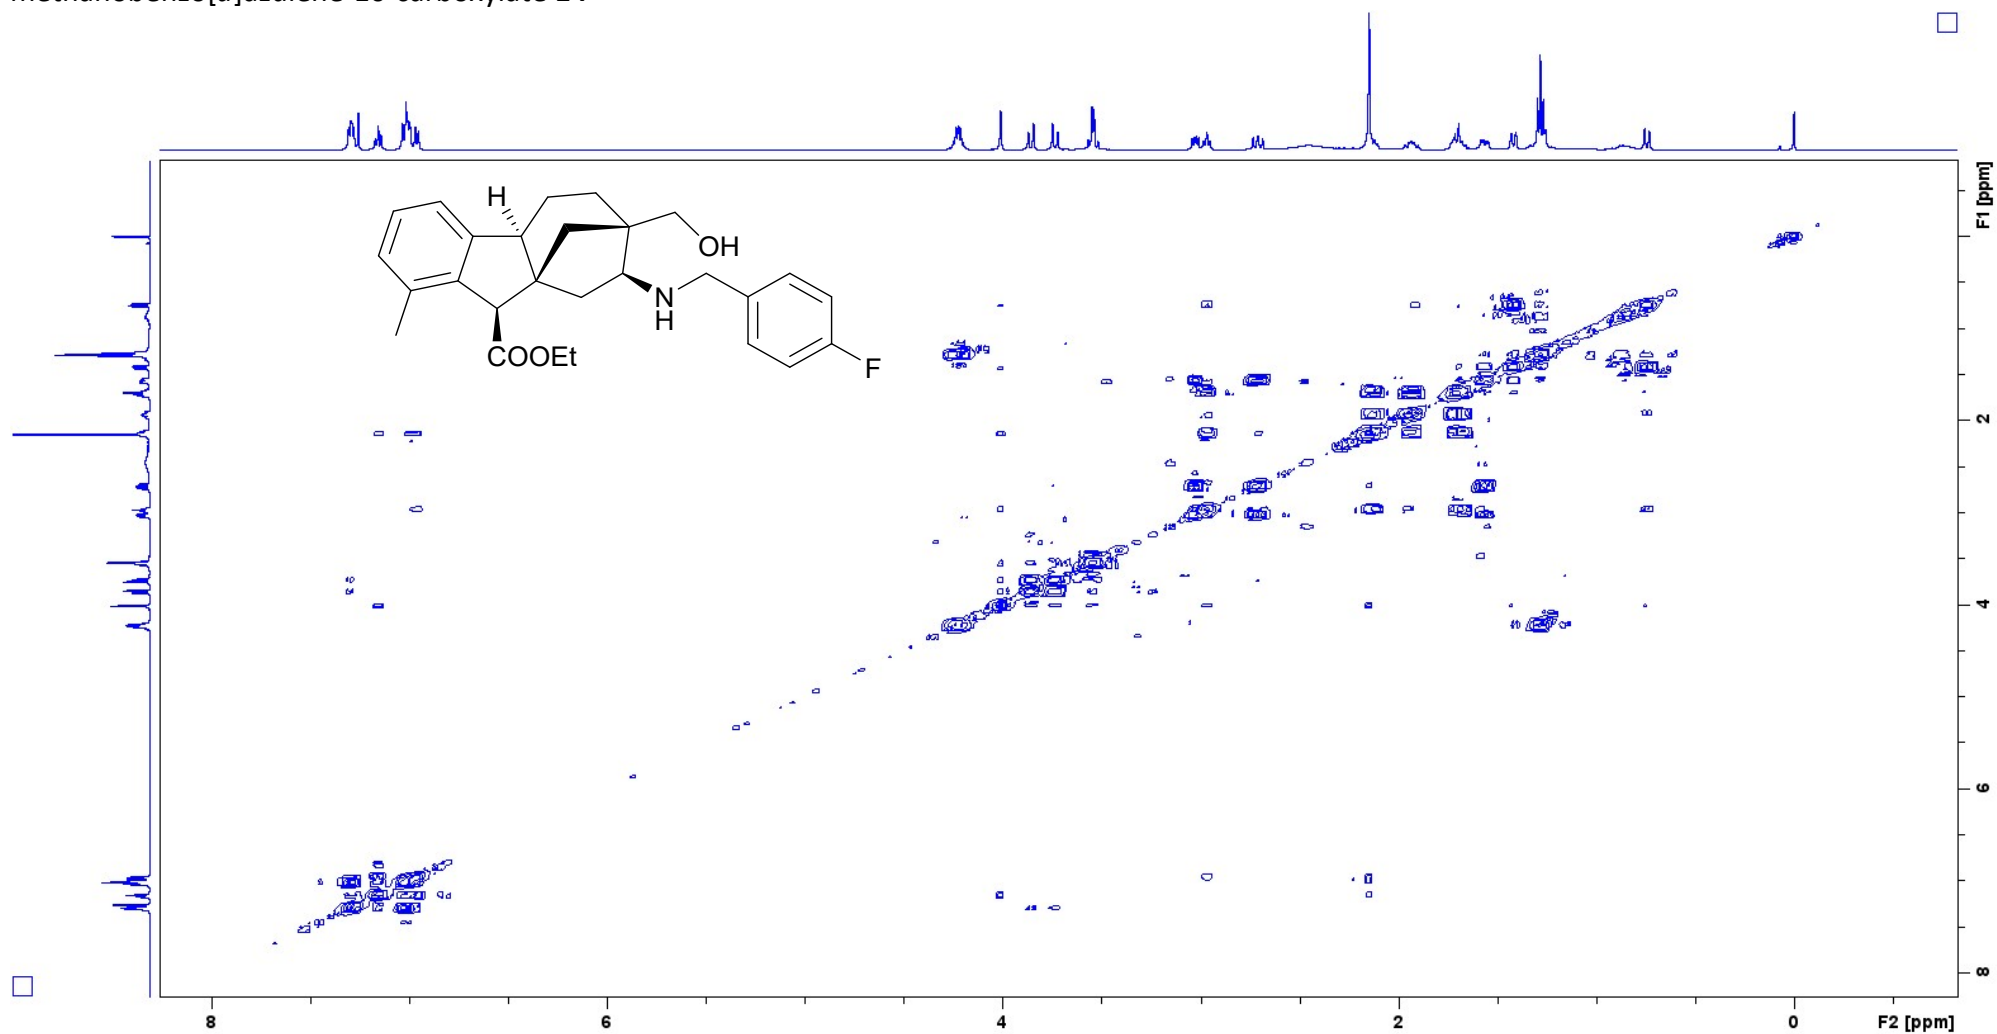

NOESY of ethyl (4*b*S,7*R*,8*S*,9*a*S,10*R*)-8-((4-fluorobenzyl)amino)-7-(hydroxymethyl)-1-methyl-4*b*,6,7,8,9,10-hexahydro-5*H*-7,9*a*-methanobenzo[*a*]azulene-10-carboxylate **14**

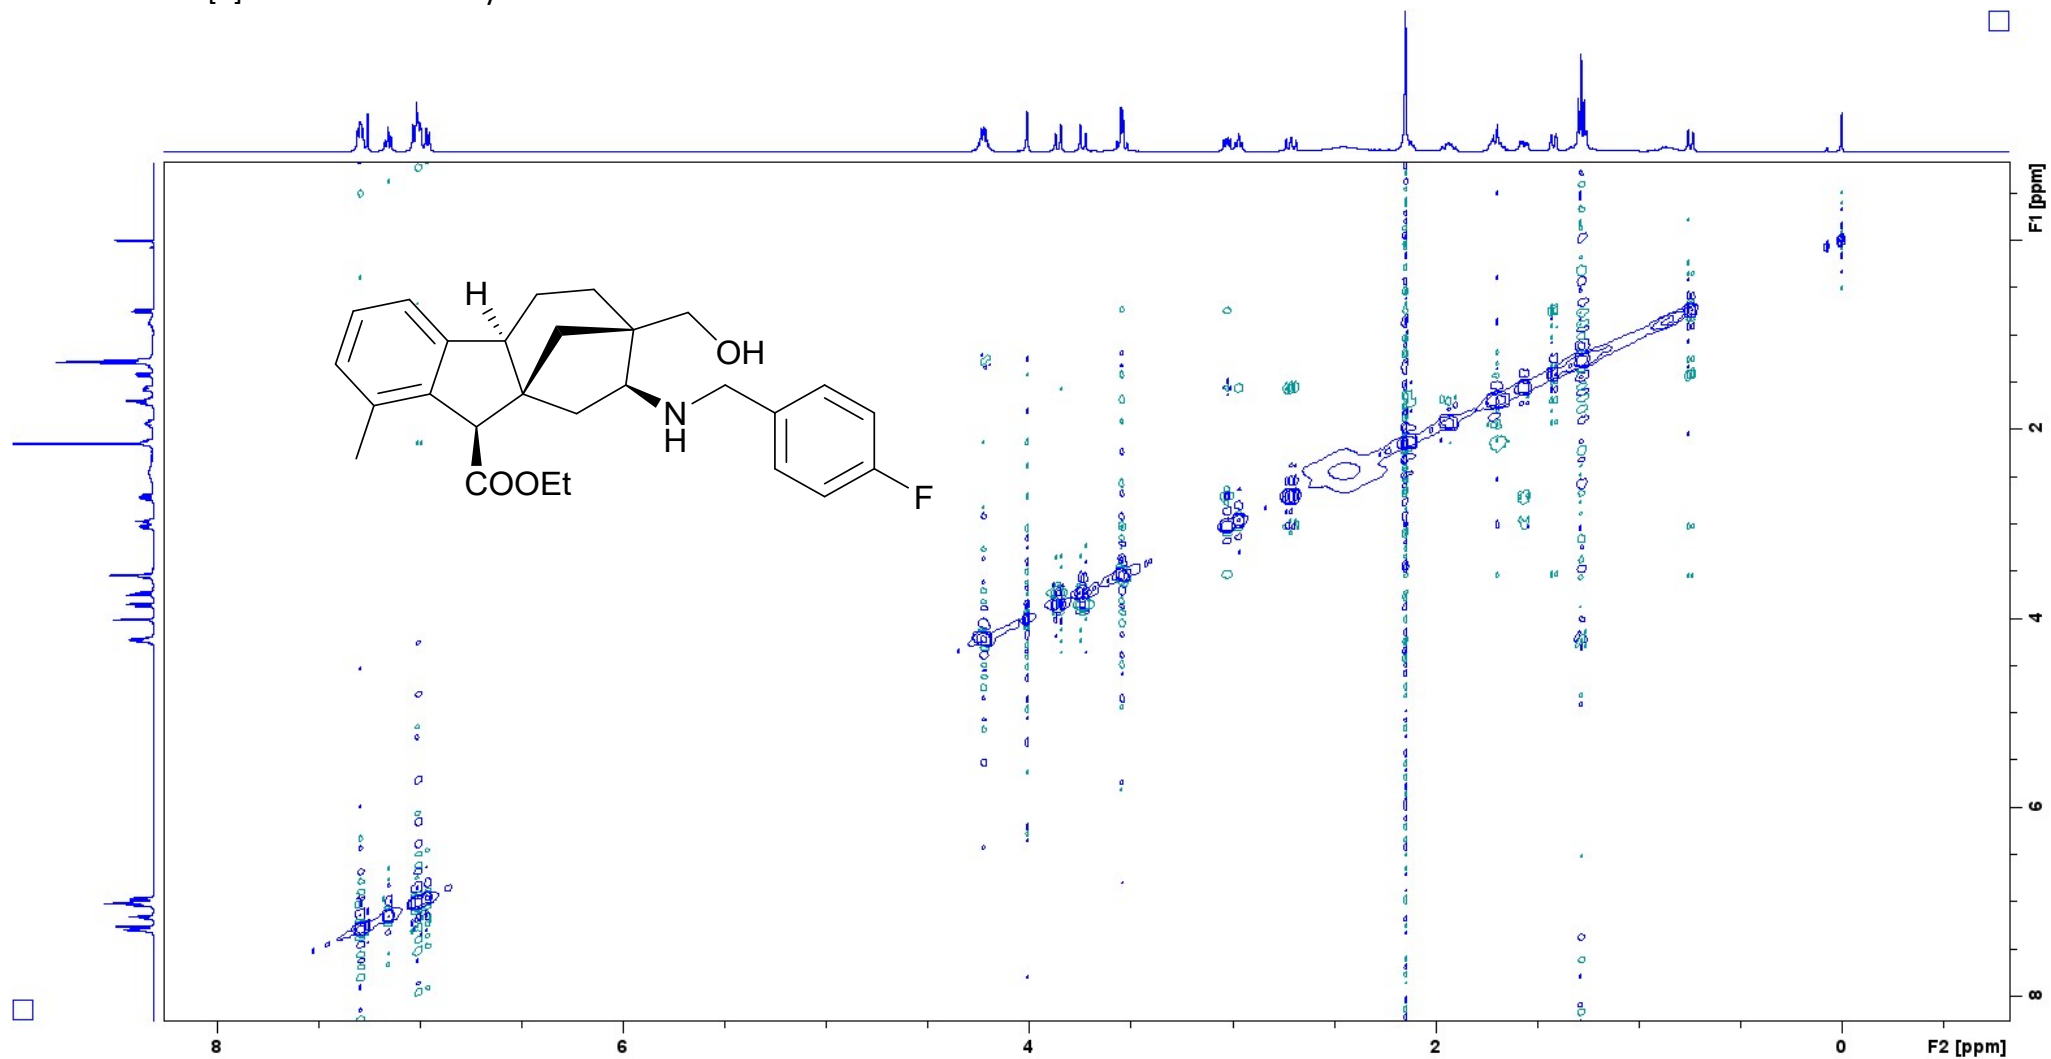

HSQC of ethyl (4*S*,7*R*,8*S*,9*aS*,10*R*)-8-((4-fluorobenzyl)amino)-7-(hydroxymethyl)-1-methyl-4*b*,6,7,8,9,10-hexahydro-5*H*-7,9a-methanobenzo[*a*]azulene-10-carboxylate **14**

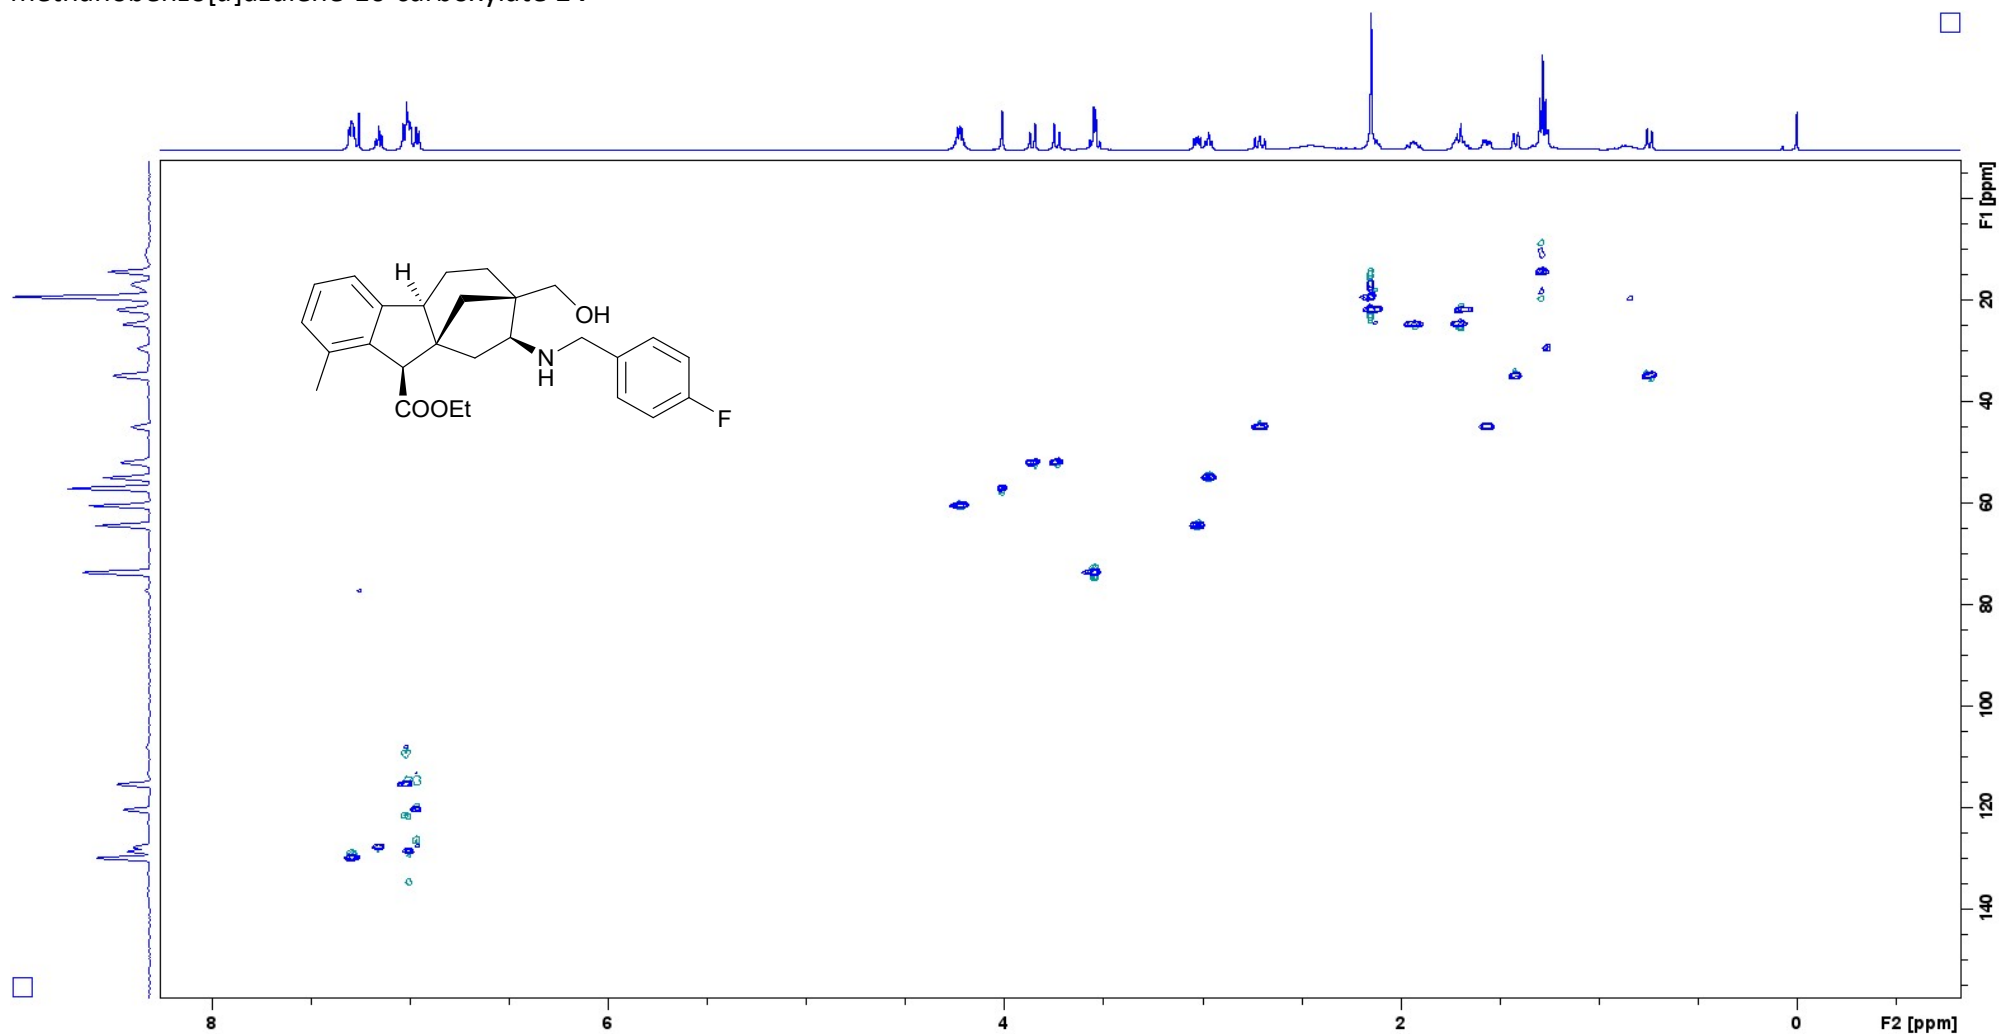

HMBC of ethyl (4*bS*,7*R*,8*S*,9*aS*,10*R*)-8-((4-fluorobenzyl)amino)-7-(hydroxymethyl)-1-methyl-4*b*,6,7,8,9,10-hexahydro-5*H*-7,9a-methanobenzo[*a*]azulene-10-carboxylate **14**

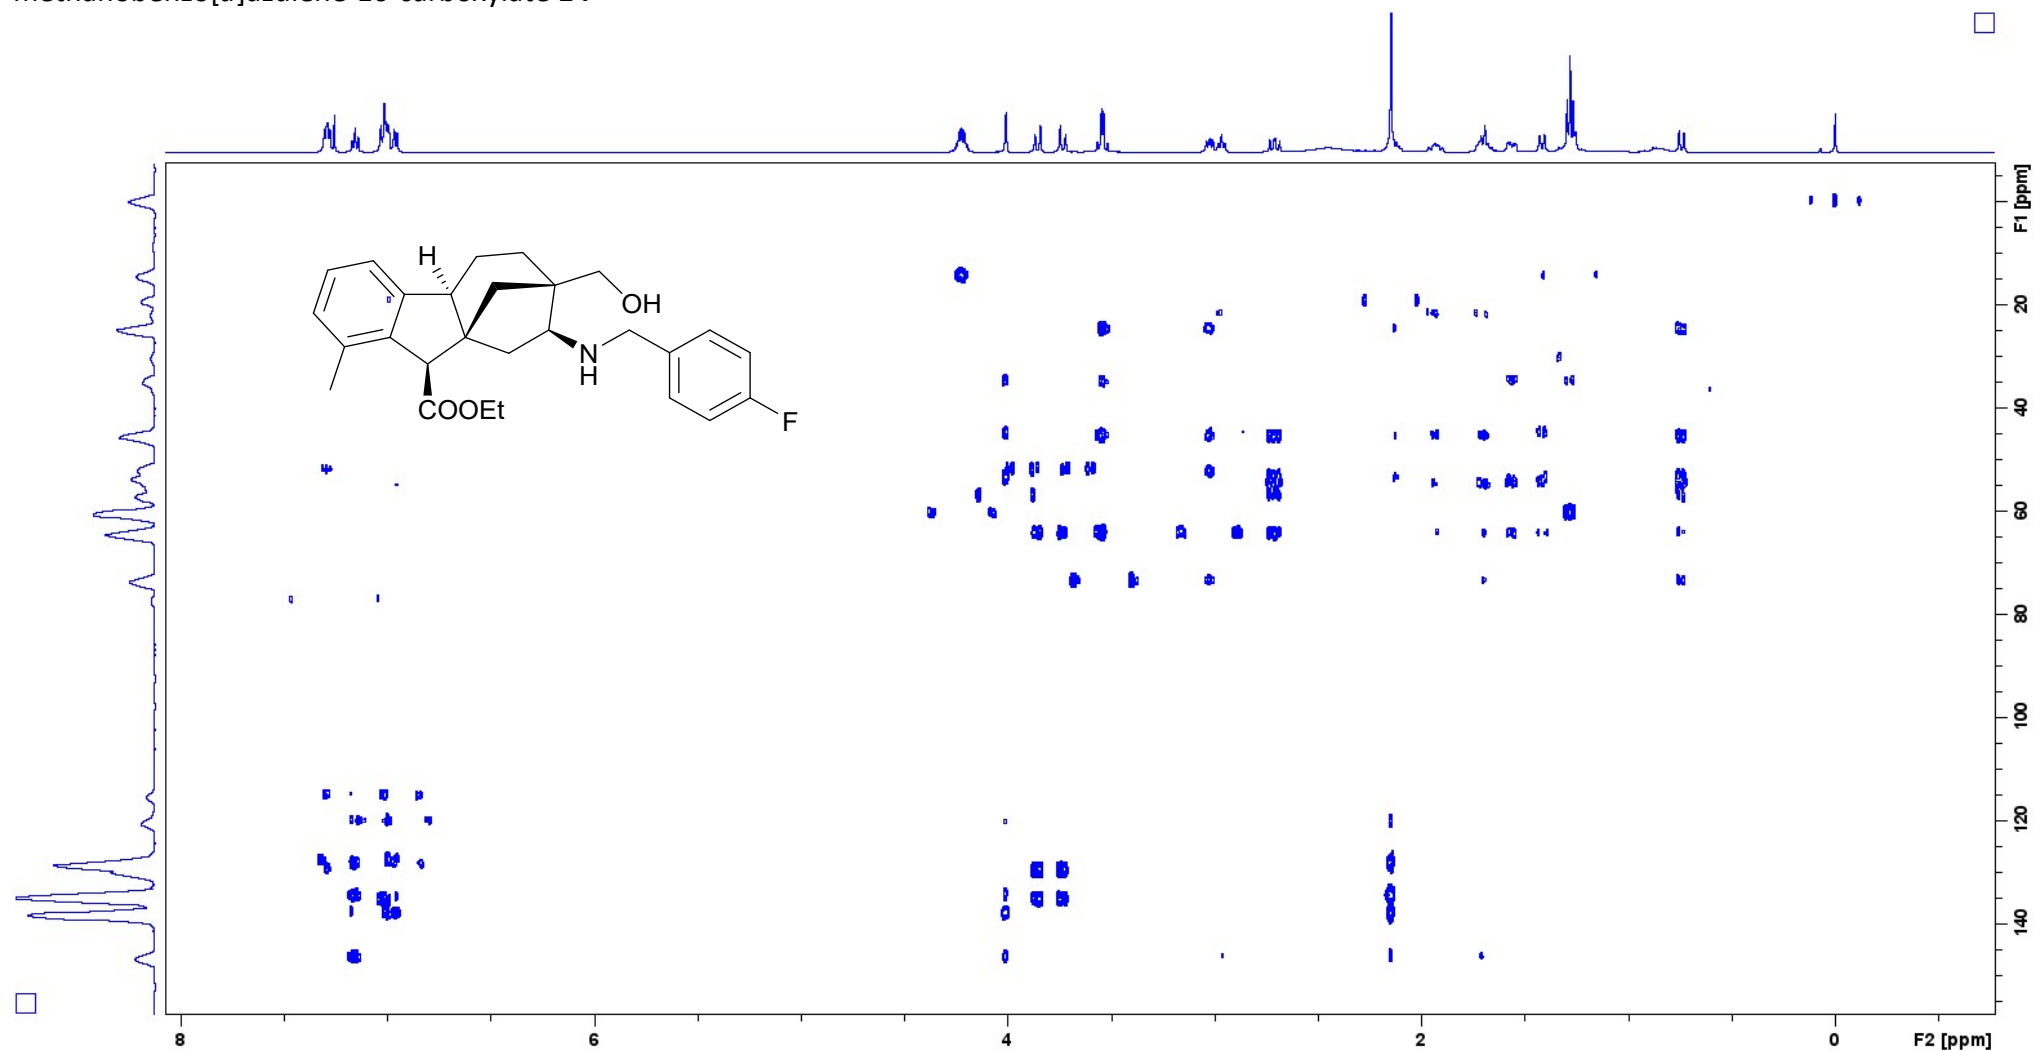

<sup>19</sup>F-NMR of ethyl (4*bS*,7*R*,8*S*,9*aS*,10*R*)-8-((4-fluorobenzyl)amino)-7-(hydroxymethyl)-1-methyl-4*b*,6,7,8,9,10-hexahydro-5*H*-7,9*a*-methanobenzo[*a*]azulene-10-carboxylate **14**

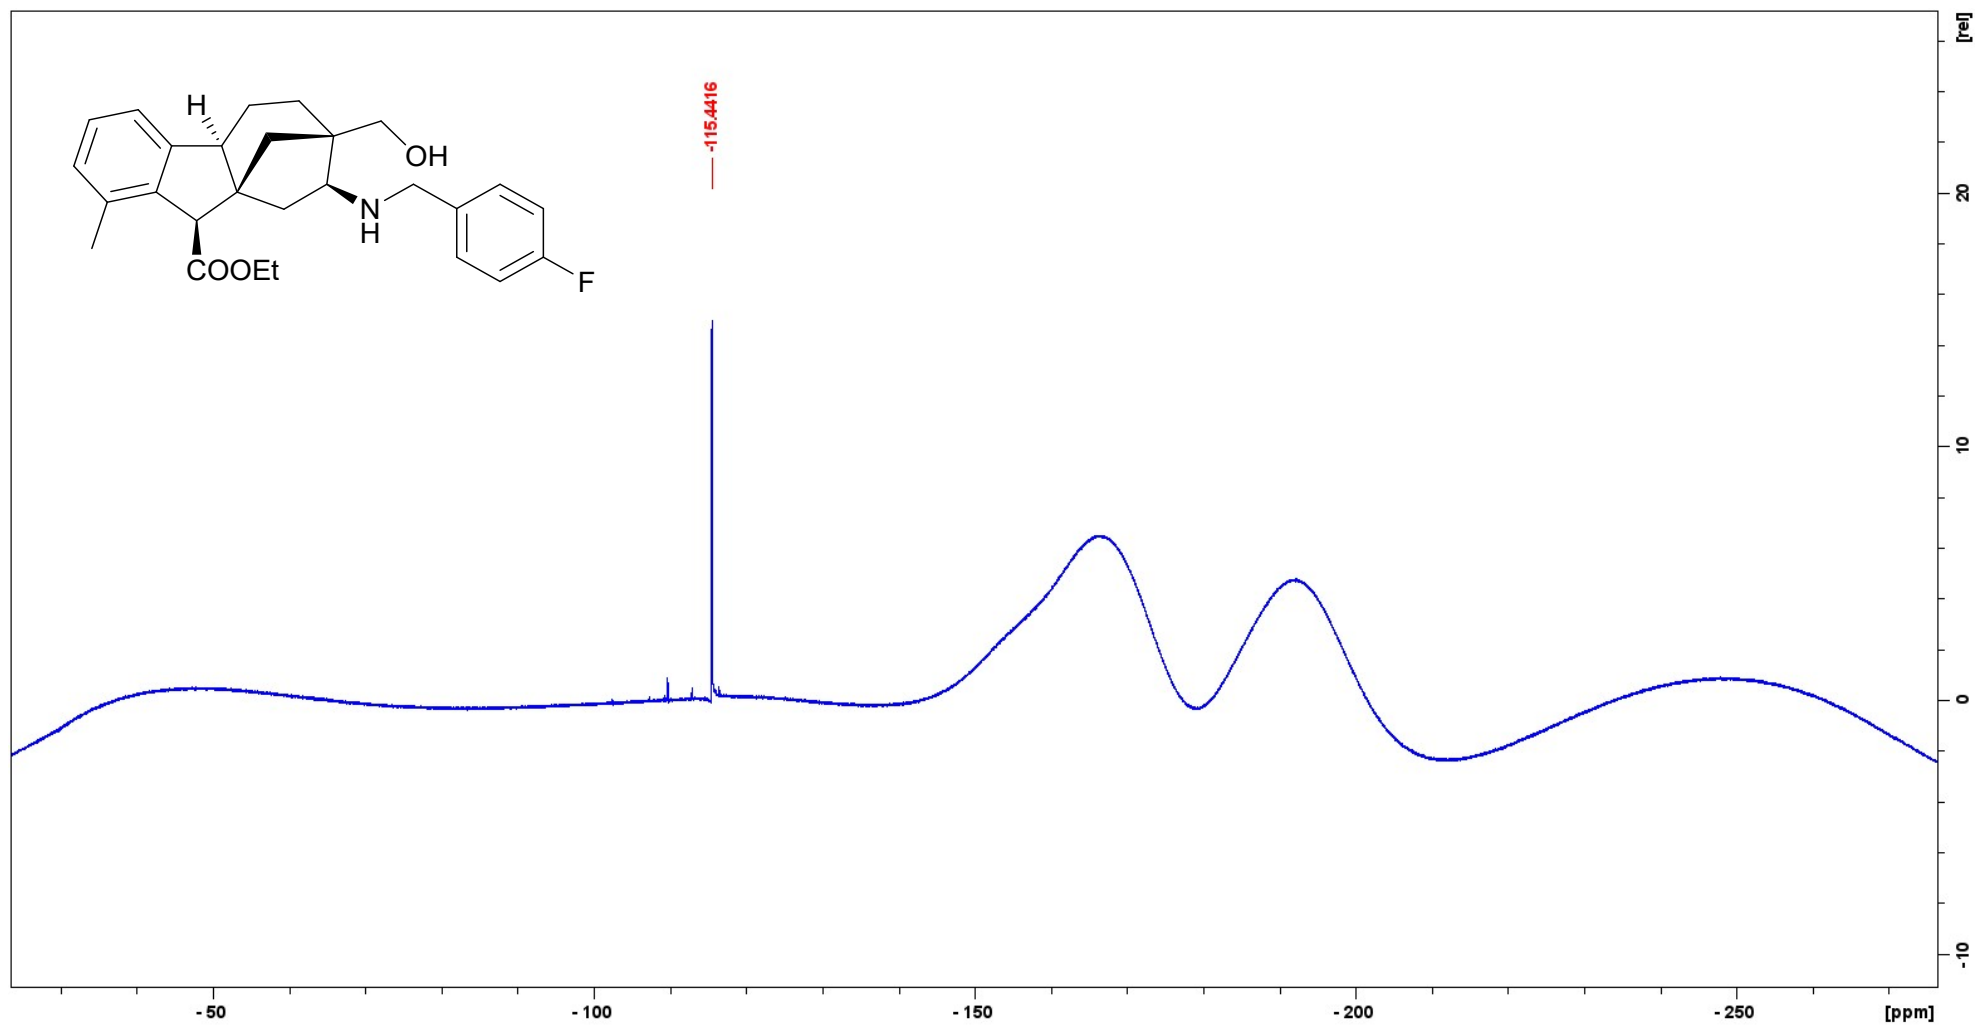

<sup>1</sup>H-NMR of ethyl (4*S*,7*R*,8*S*,9*aS*,10*R*)-7-(hydroxymethyl)-8-((4-methoxybenzyl)amino)-1-methyl-4*b*,6,7,8,9,10-hexahydro-5*H*-7,9*a*-methanobenzo[*a*]azulene-10-carboxylate **15**

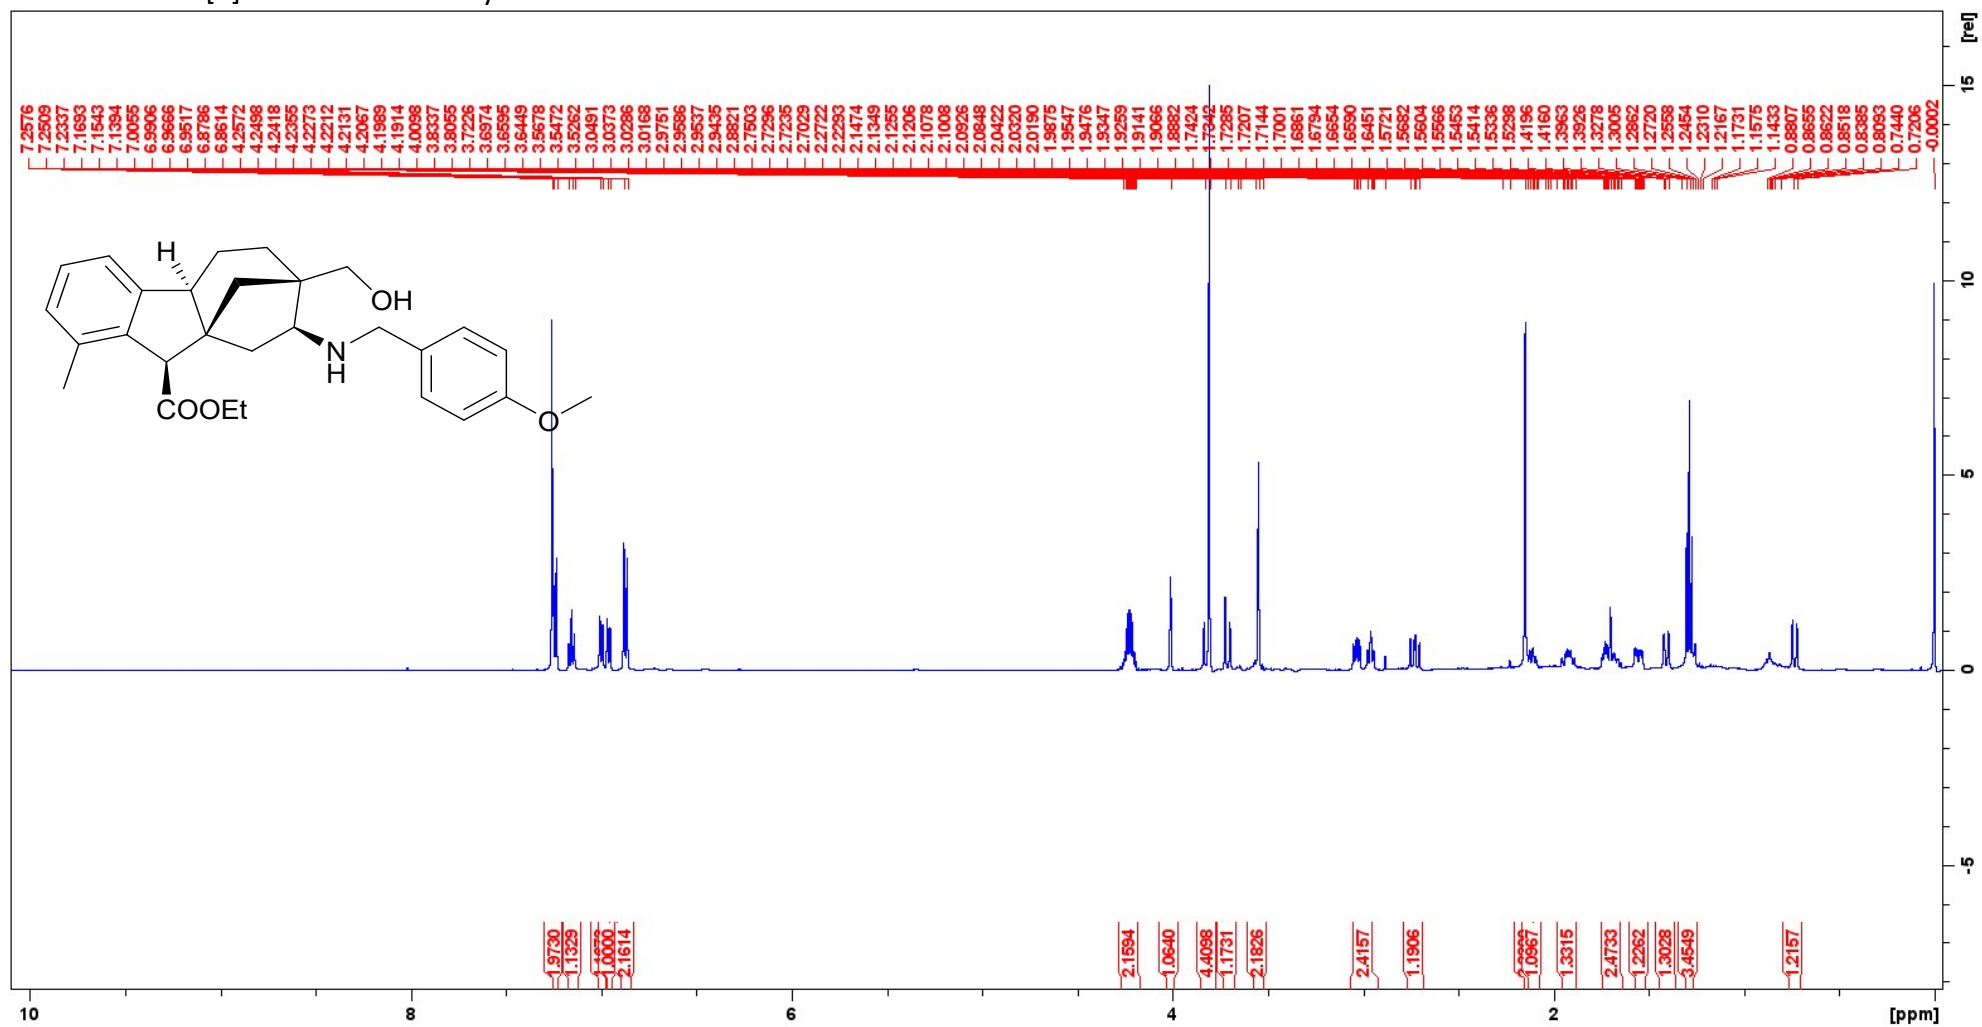

<sup>13</sup>C-NMR of ethyl (4*b**S*,7*R*,8*S*,9*a**S*,10*R*)-7-(hydroxymethyl)-8-((4-methoxybenzyl)amino)-1-methyl-4*b*,6,7,8,9,10-hexahydro-5*H*-7,9*a*-methanobenzo[*a*]azulene-10-carboxylate **15**

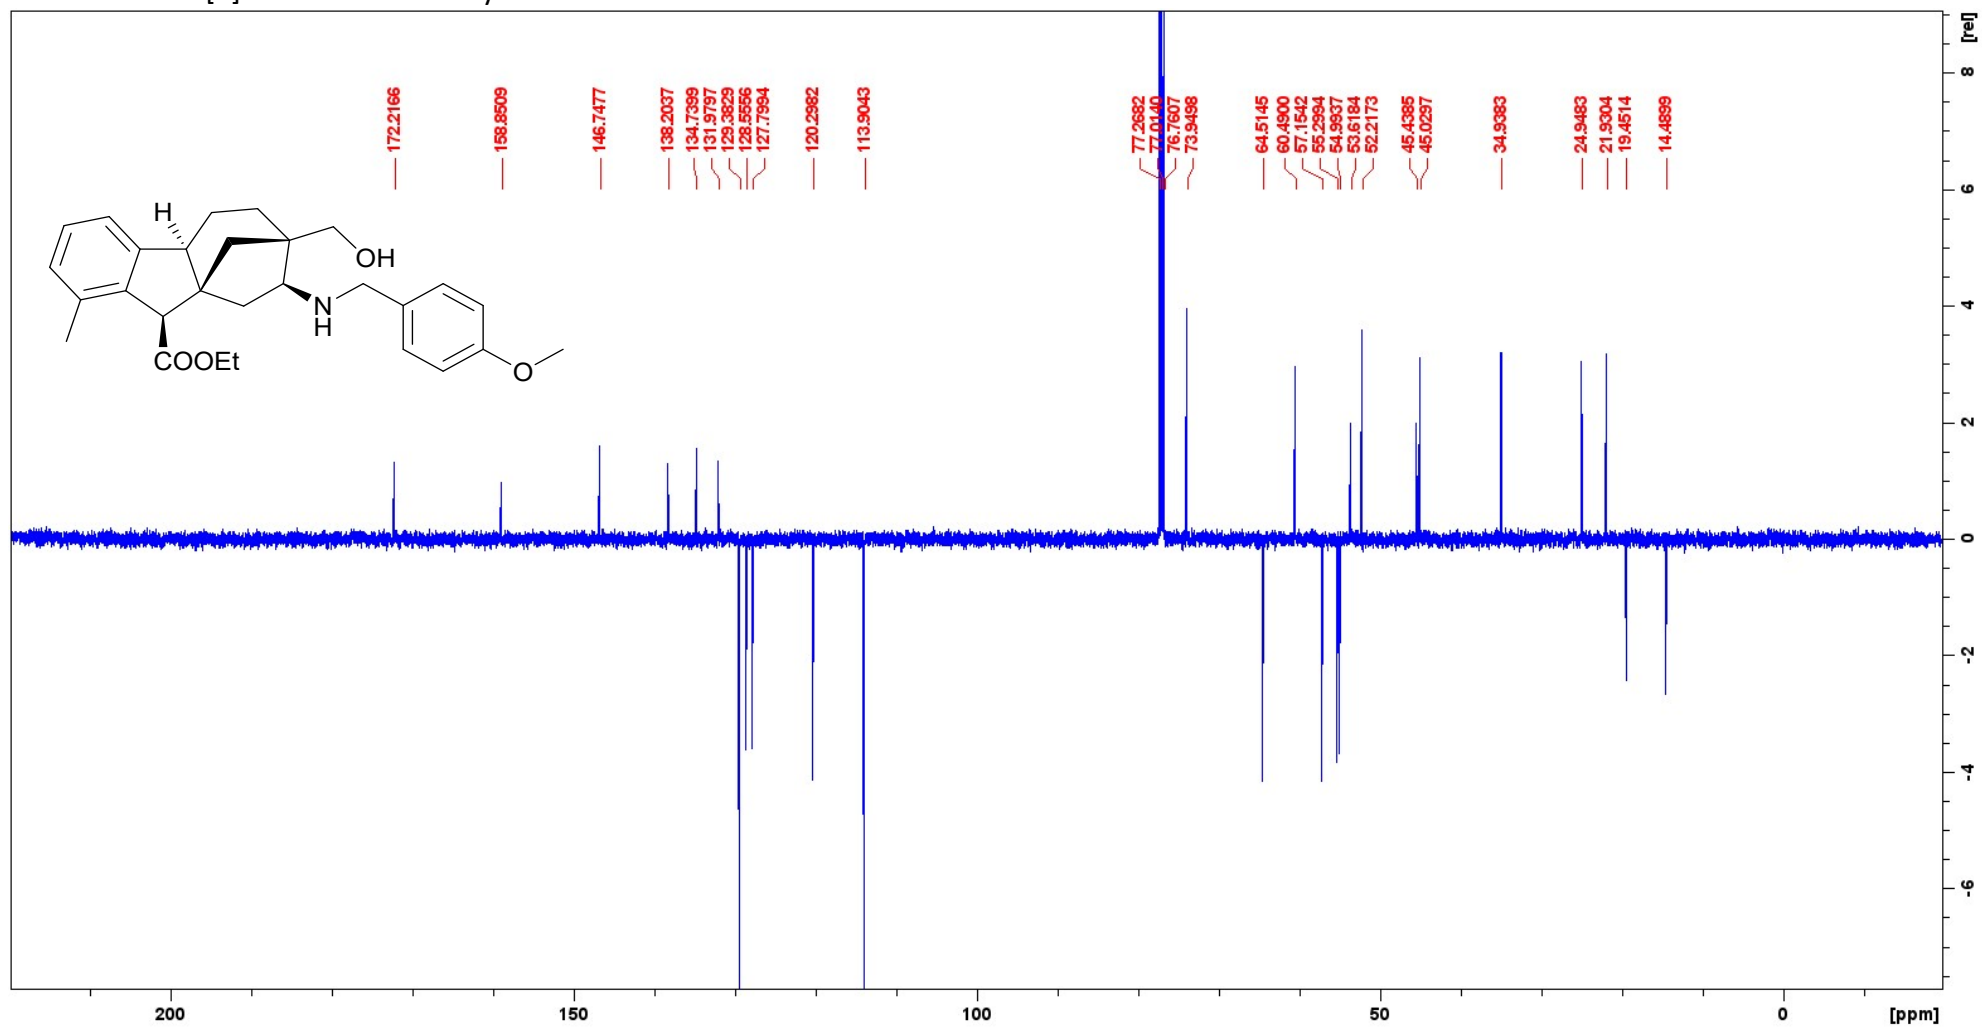



COSY of ethyl (4*S*,7*R*,8*S*,9*aS*,10*R*)-7-(hydroxymethyl)-8-((4-methoxybenzyl)amino)-1-methyl-4*b*,6,7,8,9,10-hexahydro-5*H*-7,9*a*-methanobenzo[*a*]azulene-10-carboxylate **15**

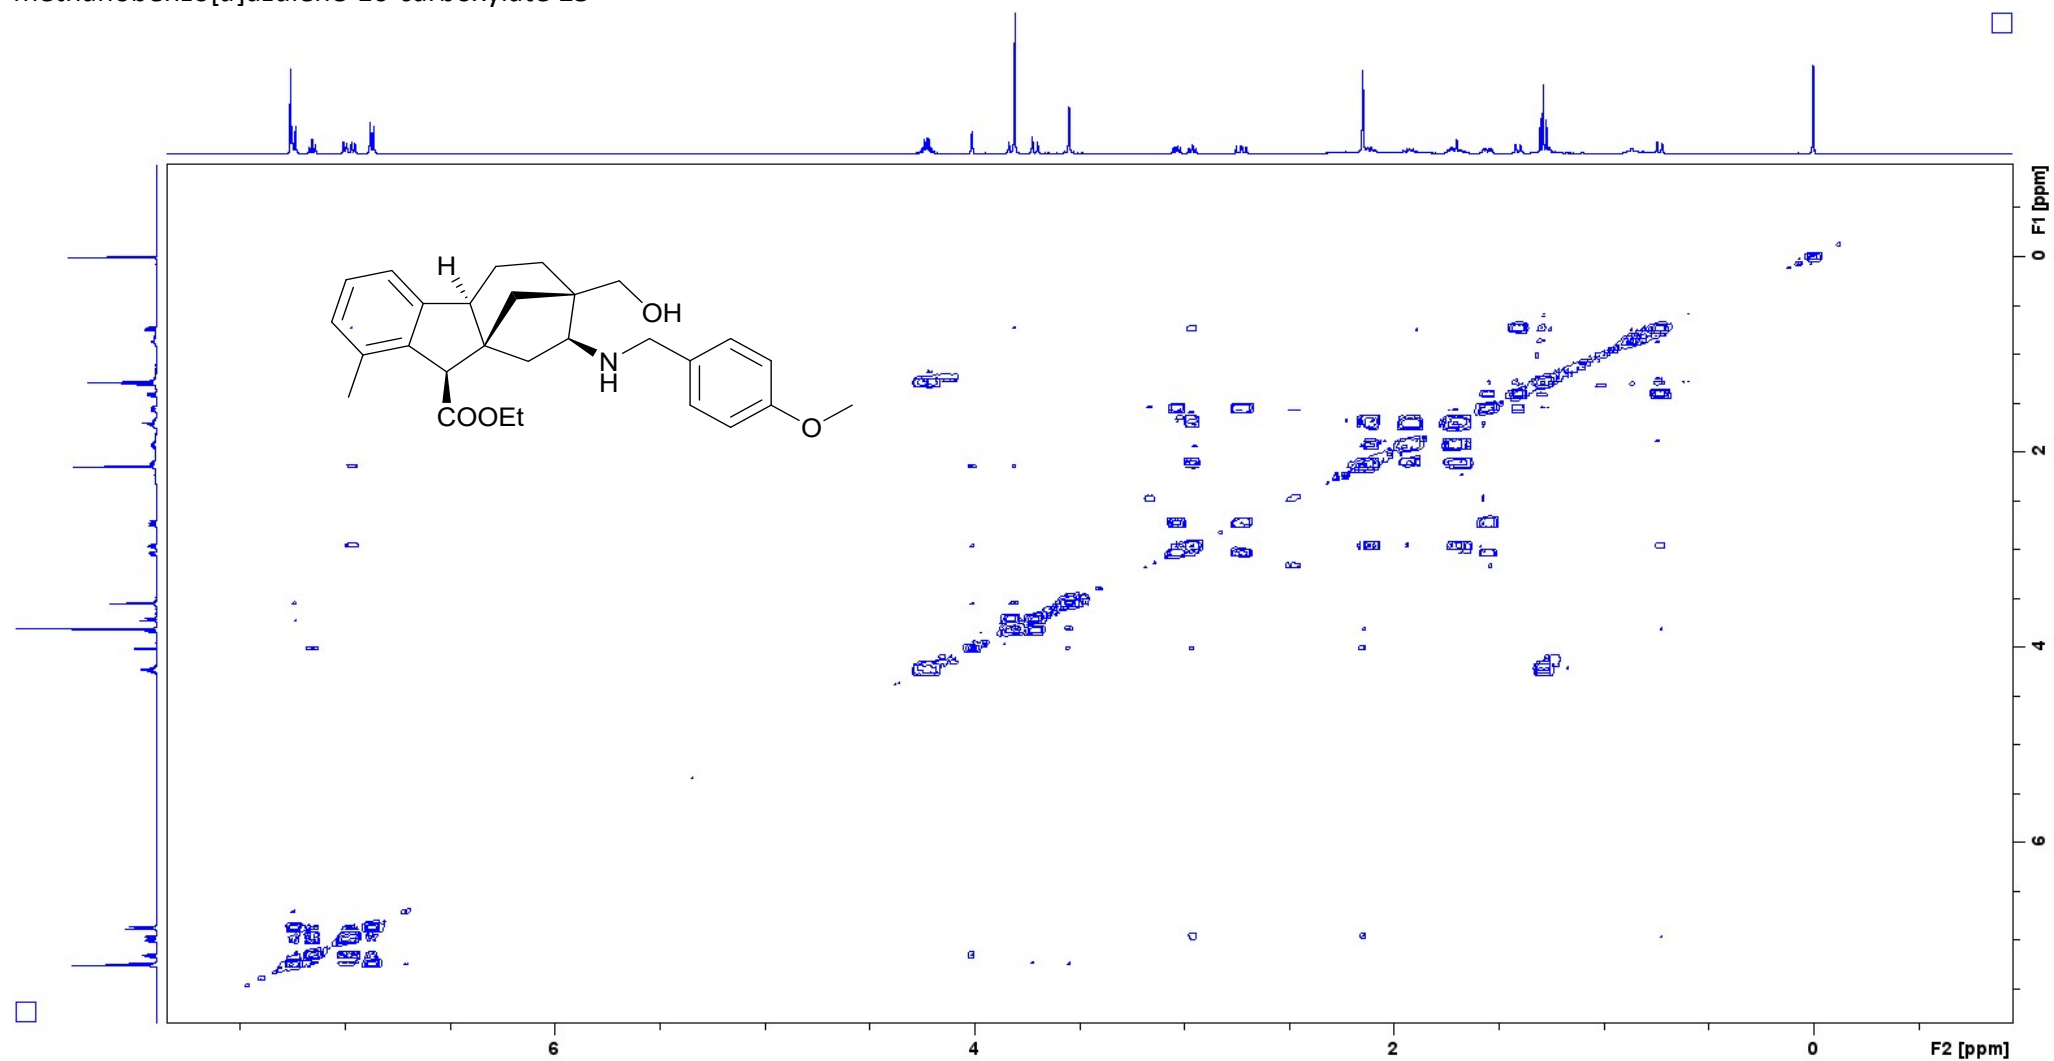

NOESY of ethyl (4*S*,7*R*,8*S*,9*aS*,10*R*)-7-(hydroxymethyl)-8-((4-methoxybenzyl)amino)-1-methyl-4*b*,6,7,8,9,10-hexahydro-5*H*-7,9*a*-methanobenzo[*a*]azulene-10-carboxylate **15**

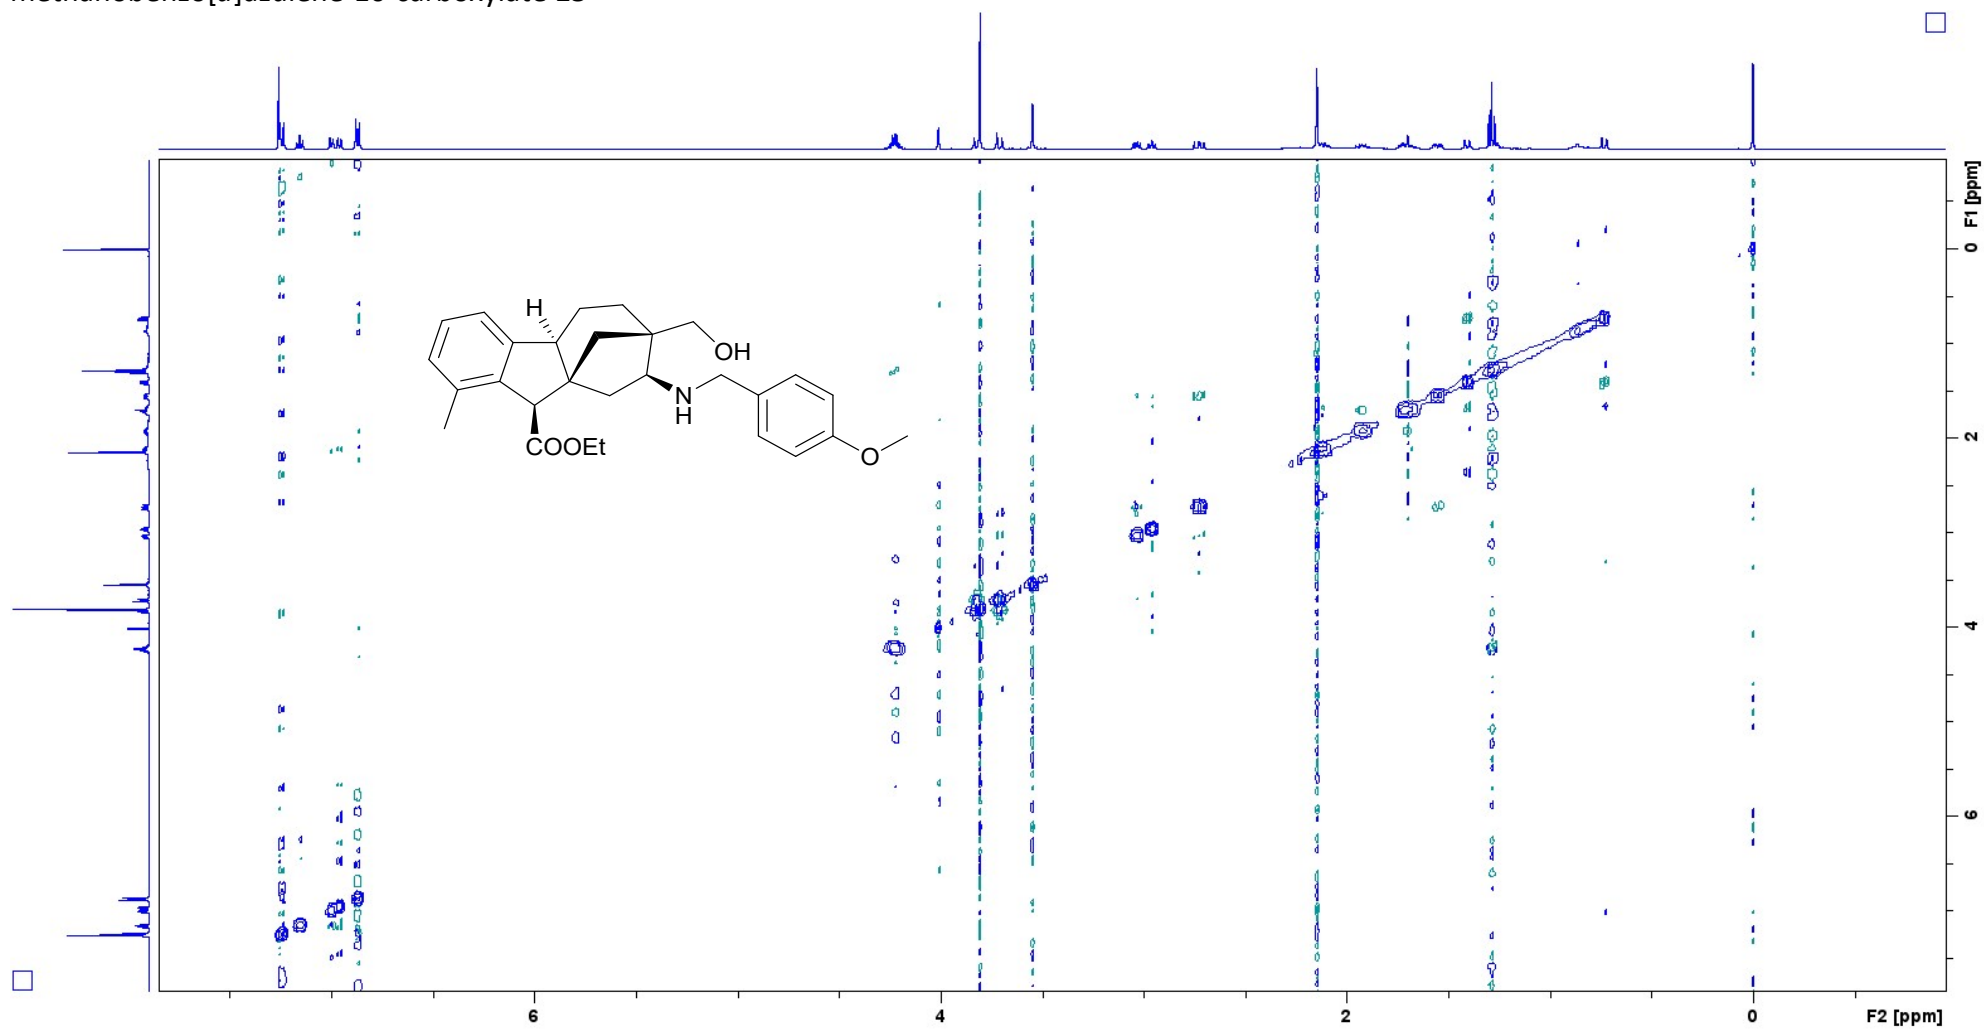

HSQC of ethyl (4*S*,7*R*,8*S*,9*aS*,10*R*)-7-(hydroxymethyl)-8-((4-methoxybenzyl)amino)-1-methyl-4*b*,6,7,8,9,10-hexahydro-5*H*-7,9*a*-methanobenzo[*a*]azulene-10-carboxylate **15**

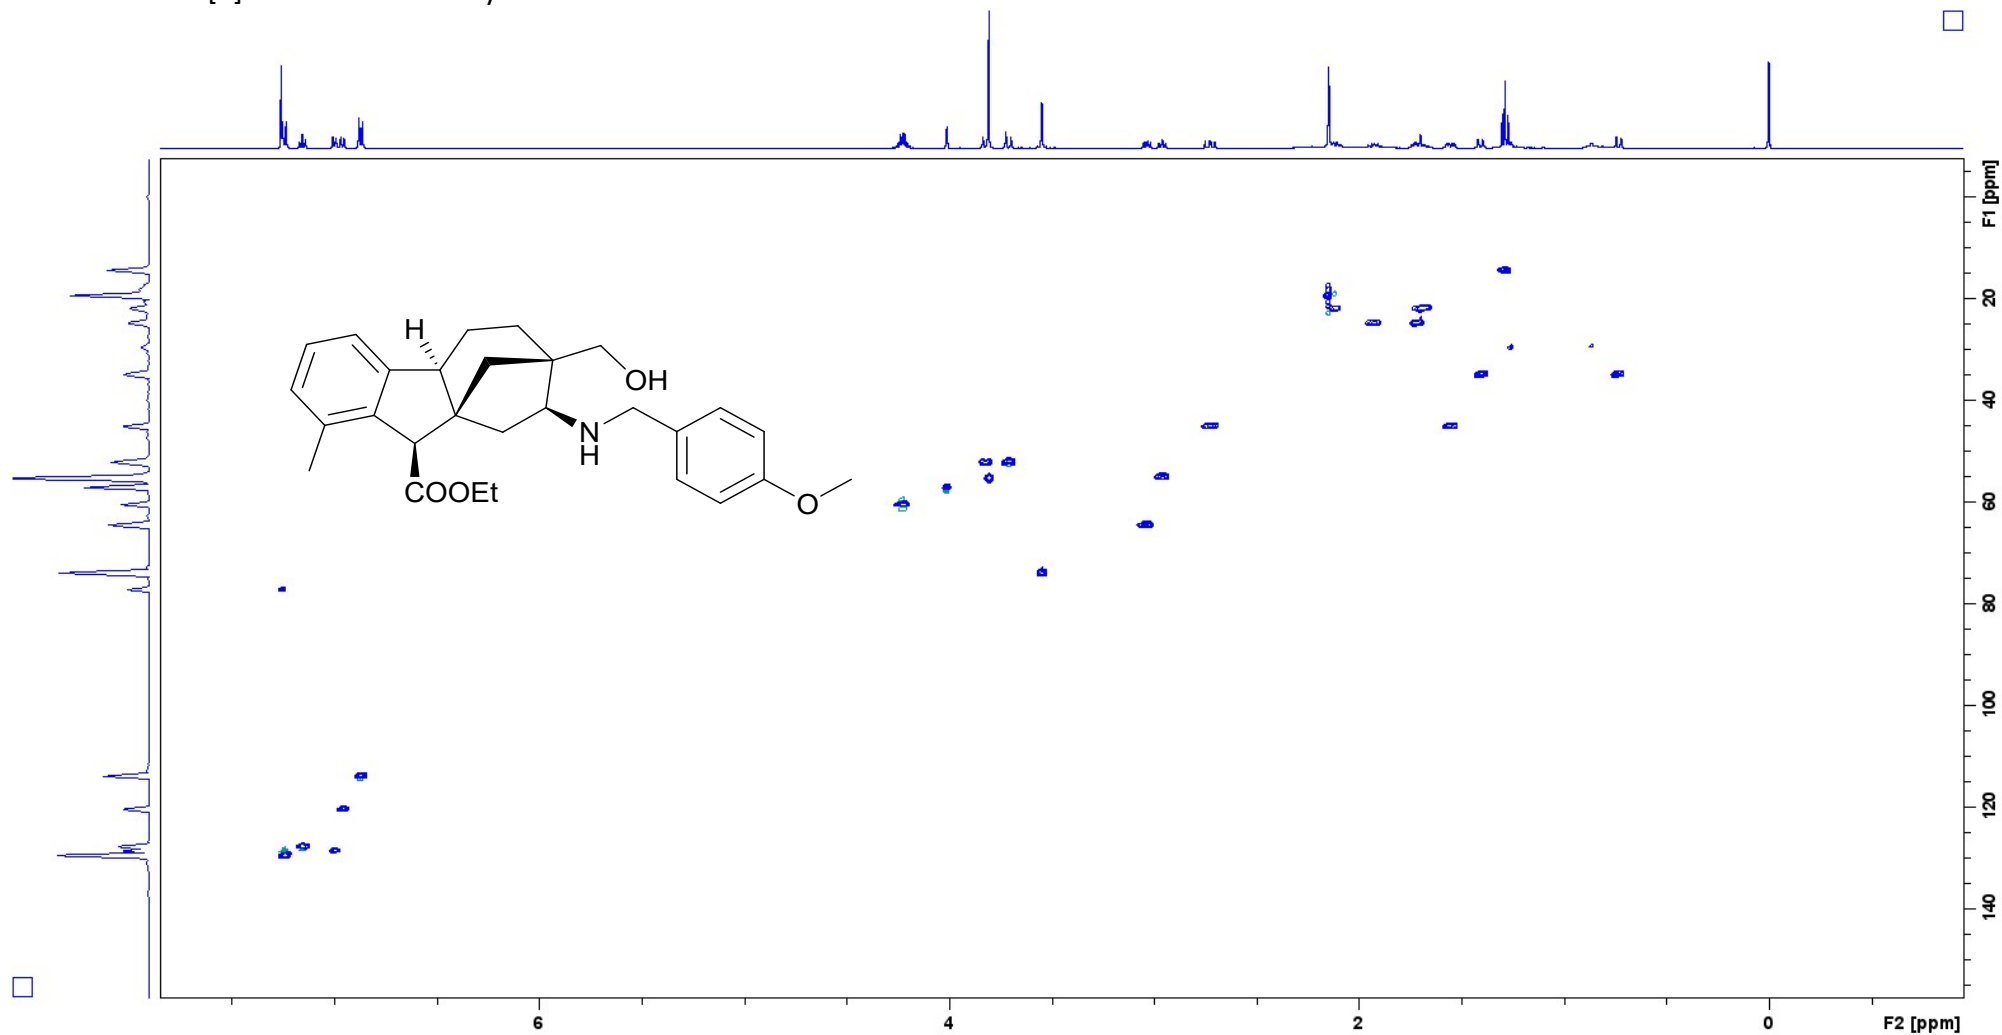

HMBC of ethyl (4*S*,7*R*,8*S*,9*aS*,10*R*)-7-(hydroxymethyl)-8-((4-methoxybenzyl)amino)-1-methyl-4*b*,6,7,8,9,10-hexahydro-5*H*-7,9*a*-methanobenzo[*a*]azulene-10-carboxylate **15**

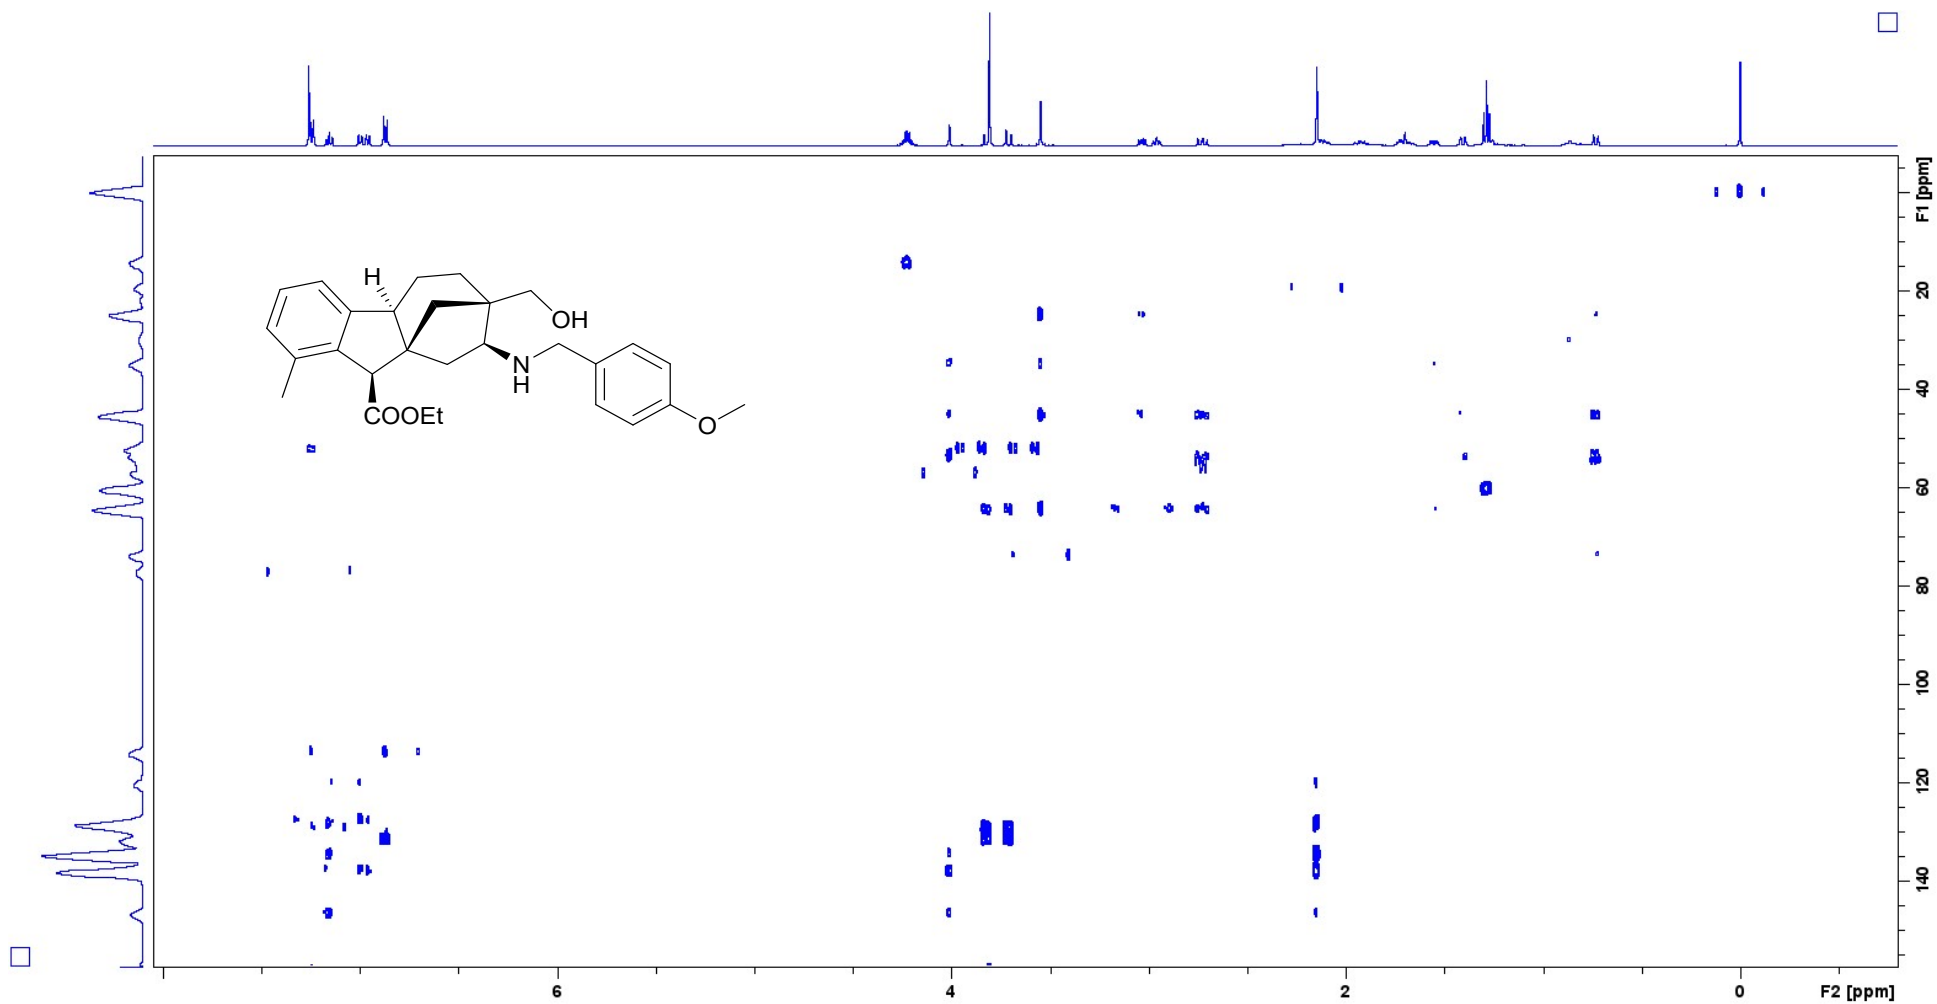

<sup>1</sup>H-NMR of ethyl (4*b*S,7*R*,8*S*,9*a*S,10*R*)-8-((2-(1*H*-indol-3-yl)ethyl)amino)-7-(hydroxymethyl)-1-methyl-4*b*,6,7,8,9,10-hexahydro-5*H*-7,9*a*-methanobenzo[*a*]azulene-10-carboxylate **16**

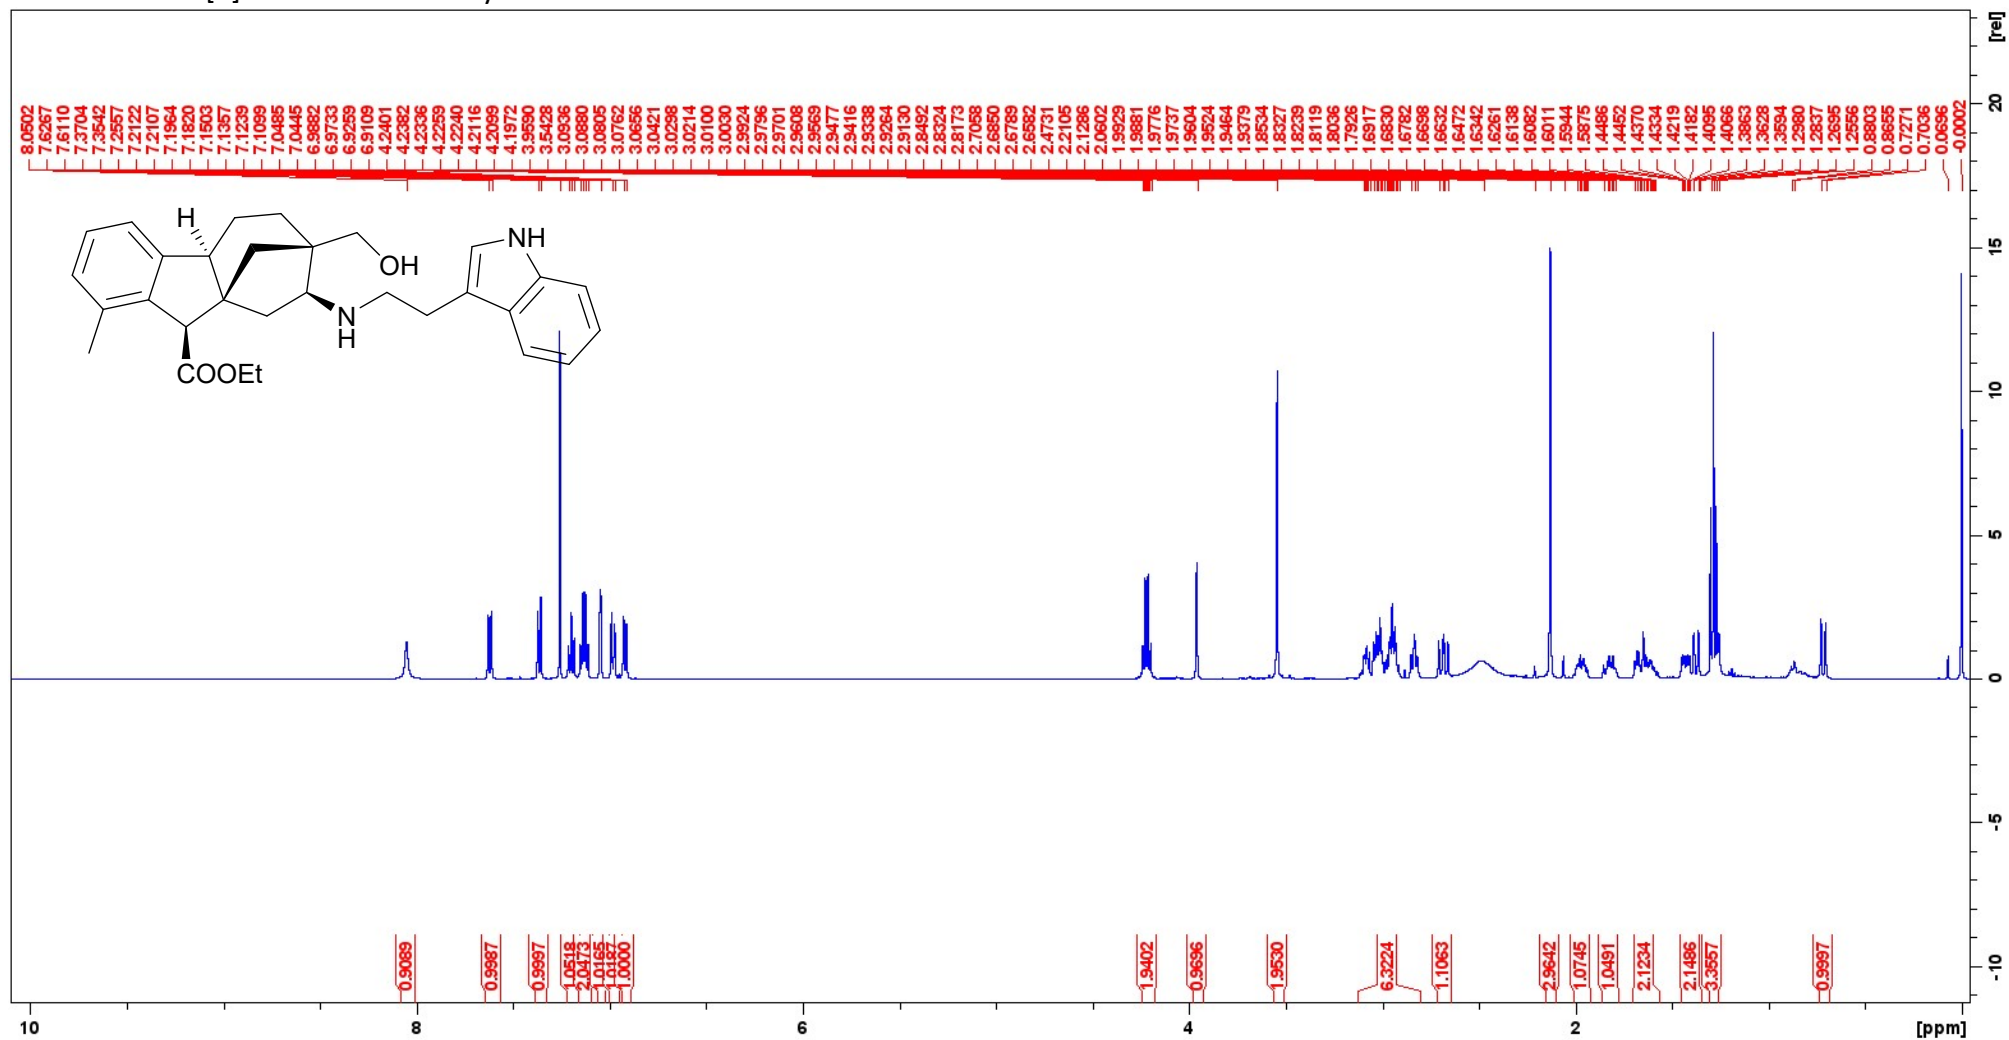

<sup>13</sup>C-NMR of ethyl (4*b*S,7*R*,8*S*,9*a*S,10*R*)-8-((2-(1*H*-indol-3-yl)ethyl)amino)-7-(hydroxymethyl)-1-methyl-4*b*,6,7,8,9,10-hexahydro-5*H*-7,9*a*-methanobenzo[*a*]azulene-10-carboxylate **16**

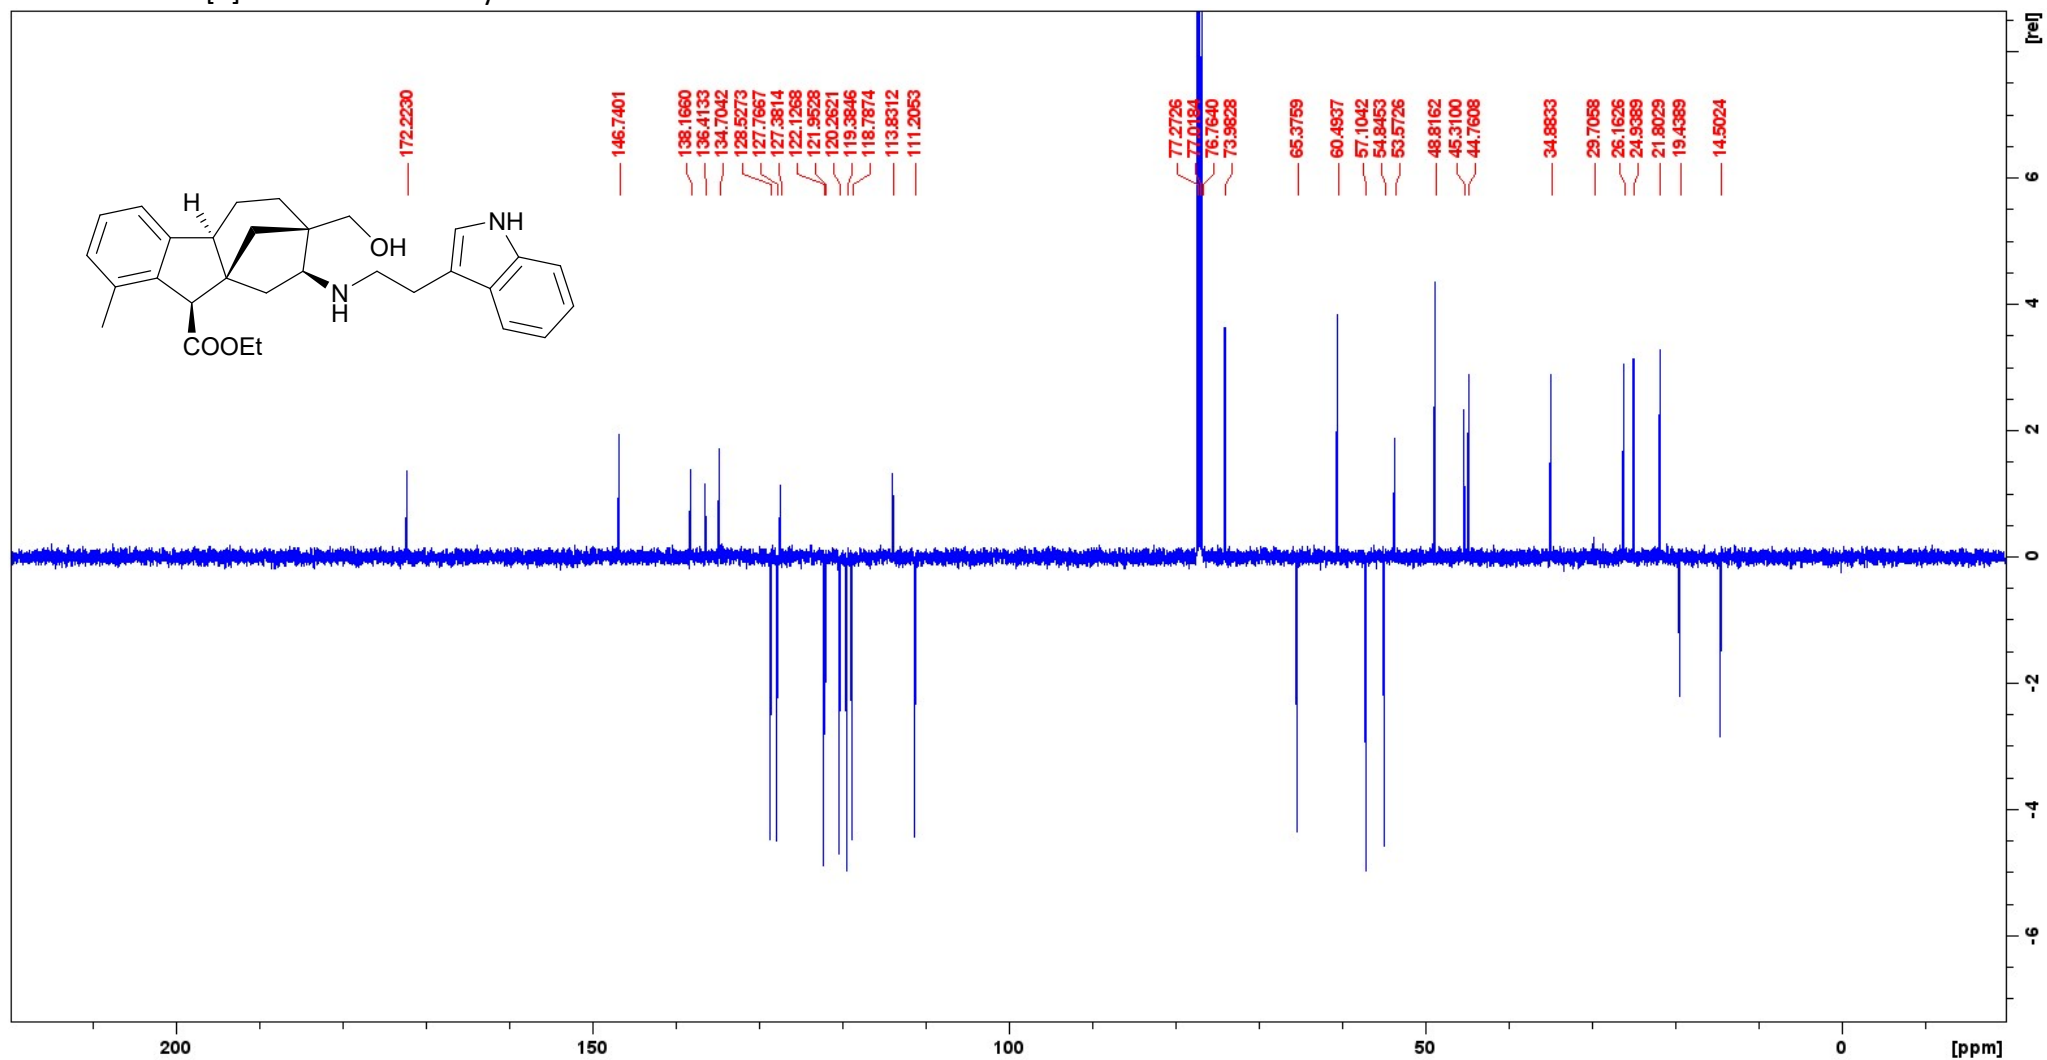

COSY of ethyl (4*S*,7*R*,8*S*,9*aS*,10*R*)-8-((2-(1*H*-indol-3-yl)ethyl)amino)-7-(hydroxymethyl)-1-methyl-4*b*,6,7,8,9,10-hexahydro-5*H*-7,9*a*-methanobenzo[*a*]azulene-10-carboxylate **16**

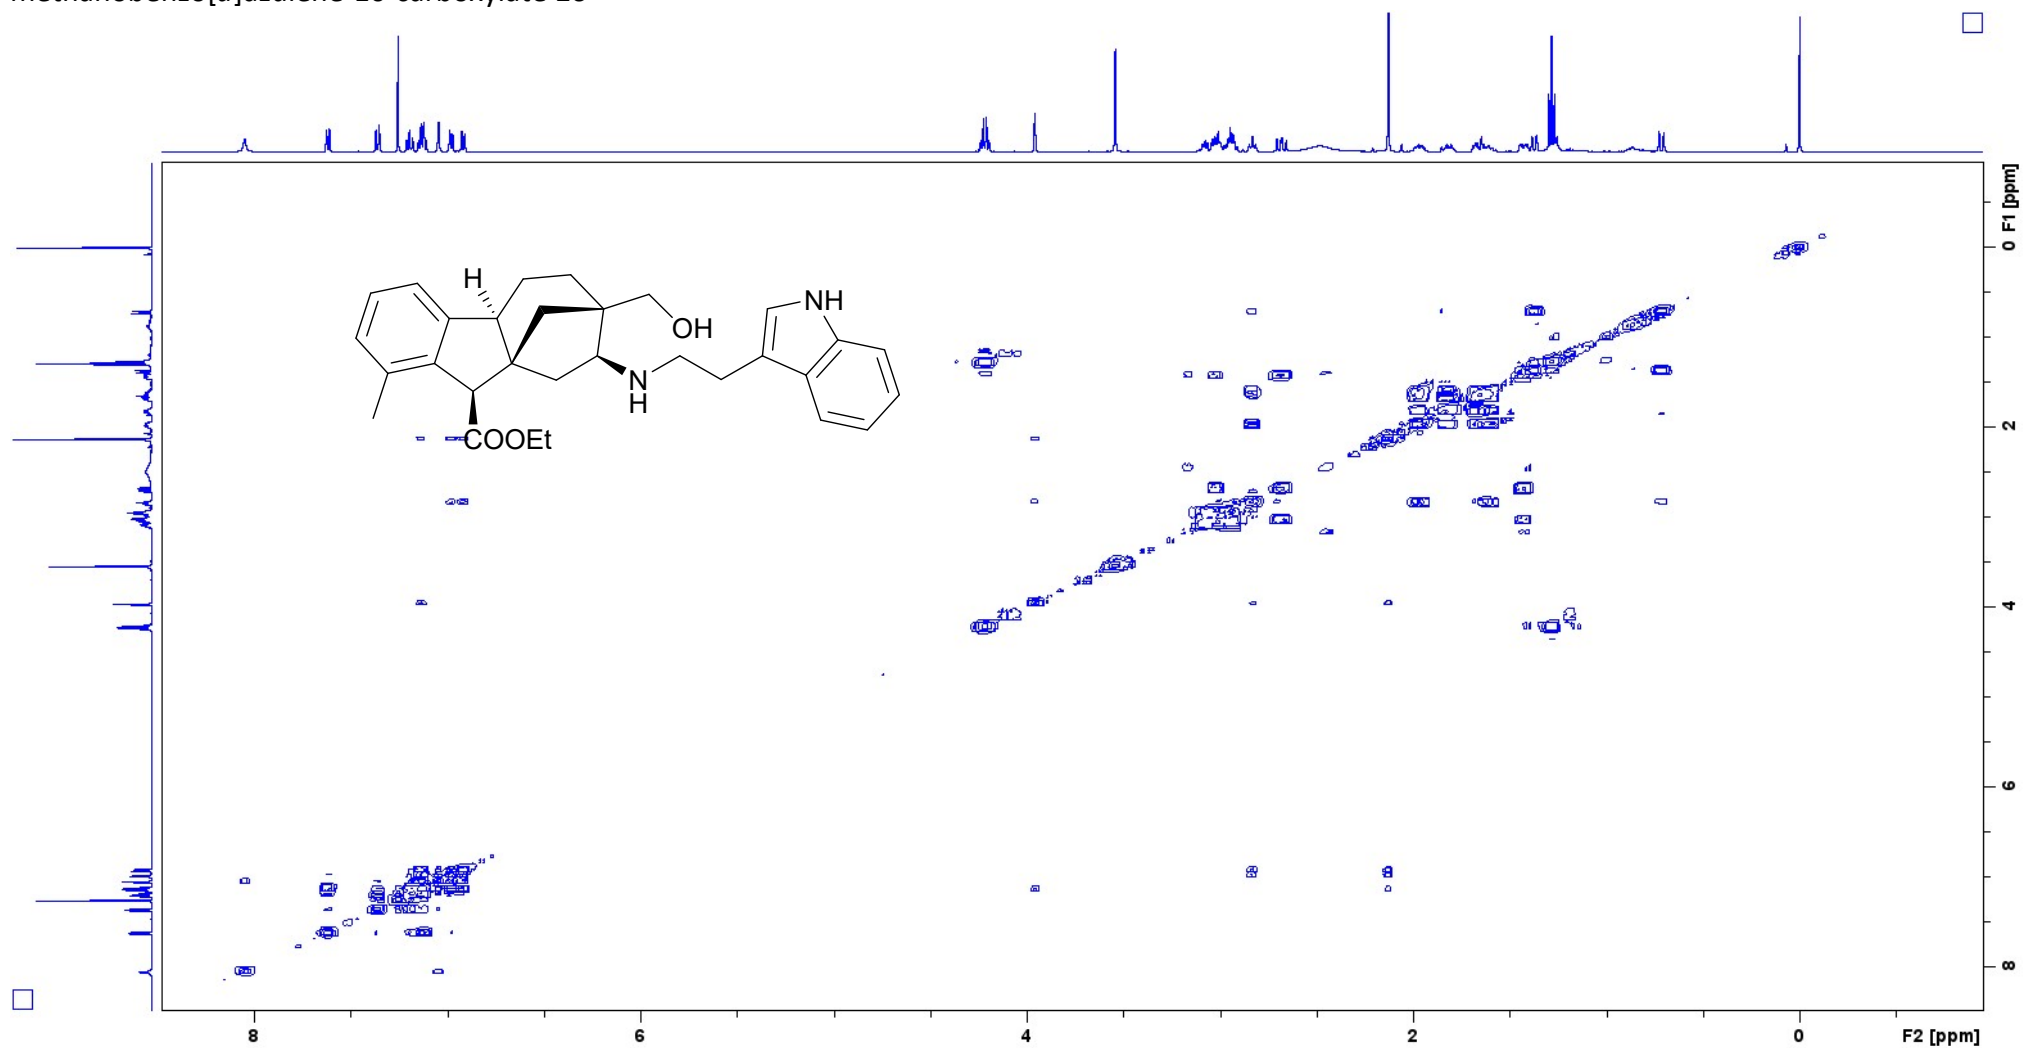

NOESY of ethyl (4*b*S,7*R*,8*S*,9*a*S,10*R*)-8-((2-(1*H*-indol-3-yl)ethyl)amino)-7-(hydroxymethyl)-1-methyl-4*b*,6,7,8,9,10-hexahydro-5*H*-7,9*a*-methanobenzo[*a*]azulene-10-carboxylate **16**

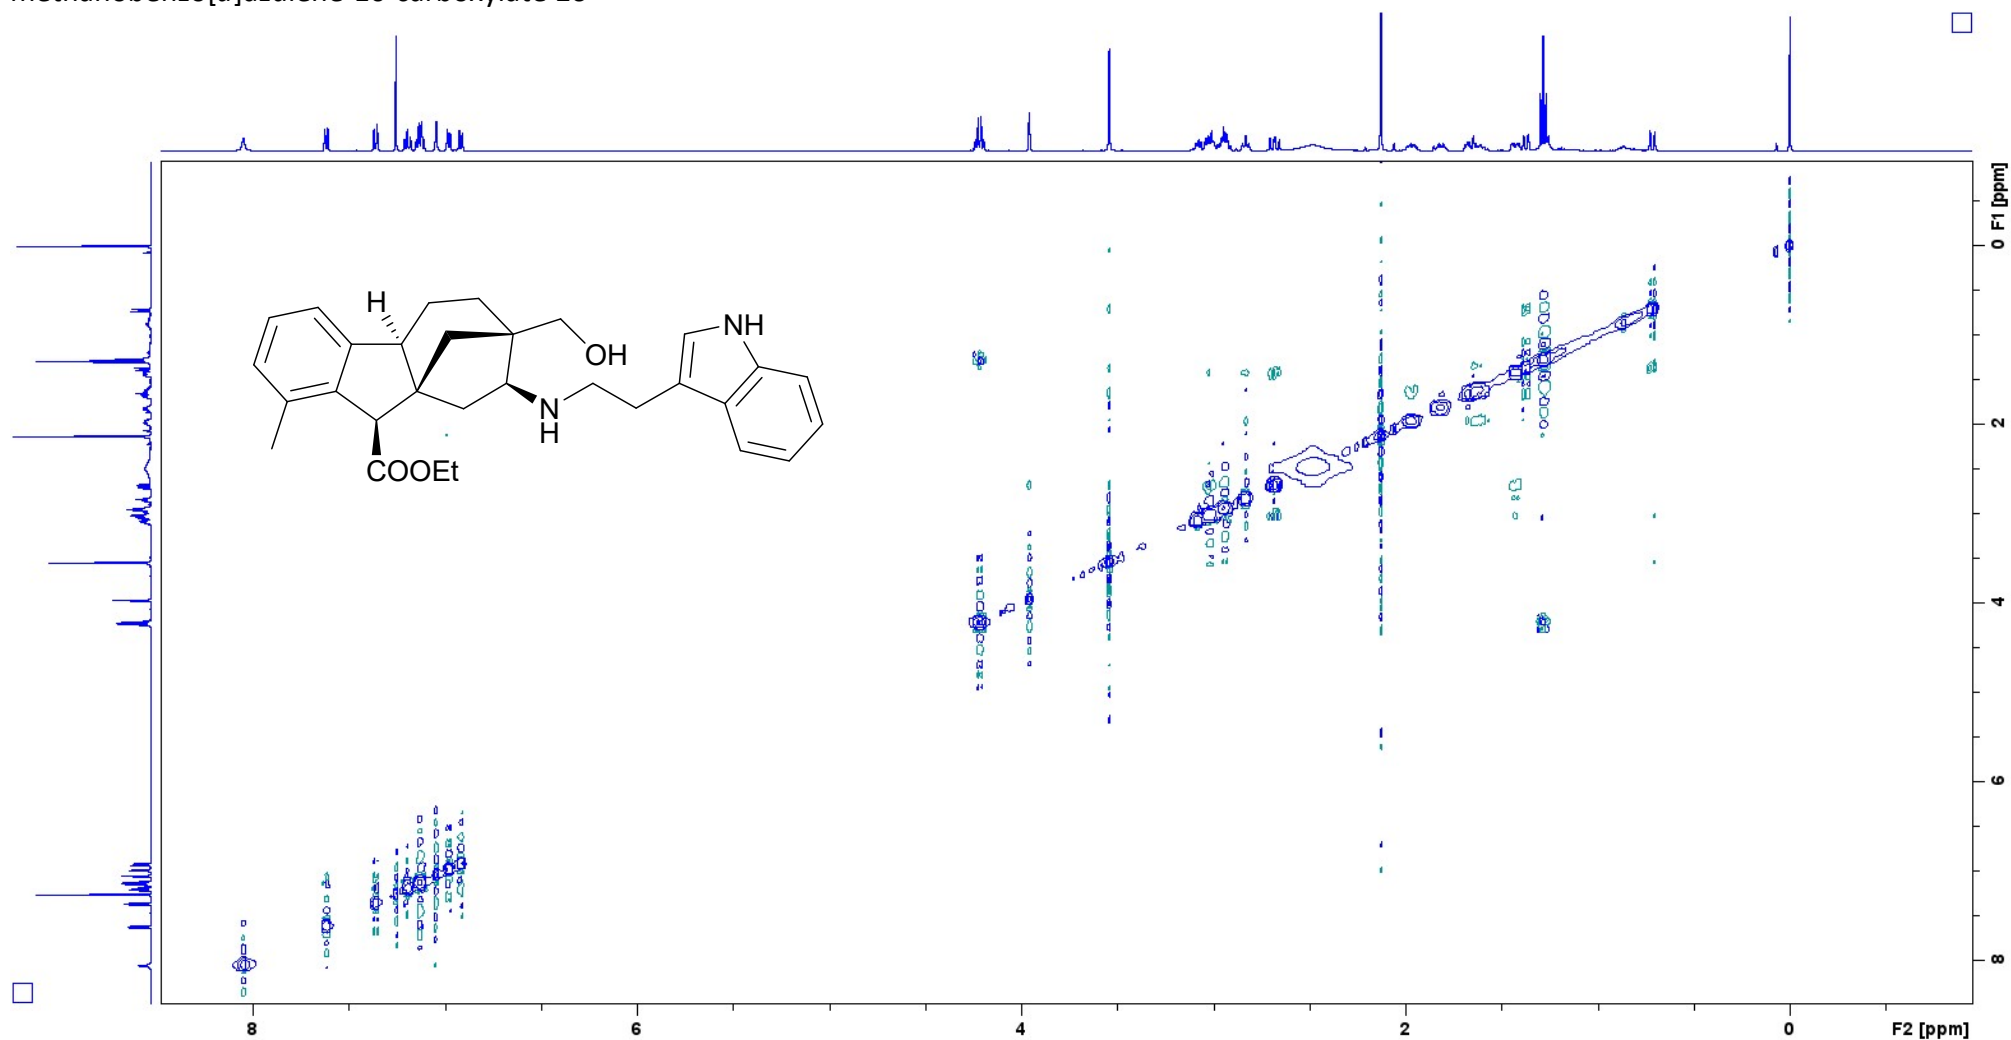



HSQC of ethyl (4*b*S,7*R*,8*S*,9*a*S,10*R*)-8-((2-(1*H*-indol-3-yl)ethyl)amino)-7-(hydroxymethyl)-1-methyl-4*b*,6,7,8,9,10-hexahydro-5*H*-7,9*a*-methanobenzo[*a*]azulene-10-carboxylate **16**

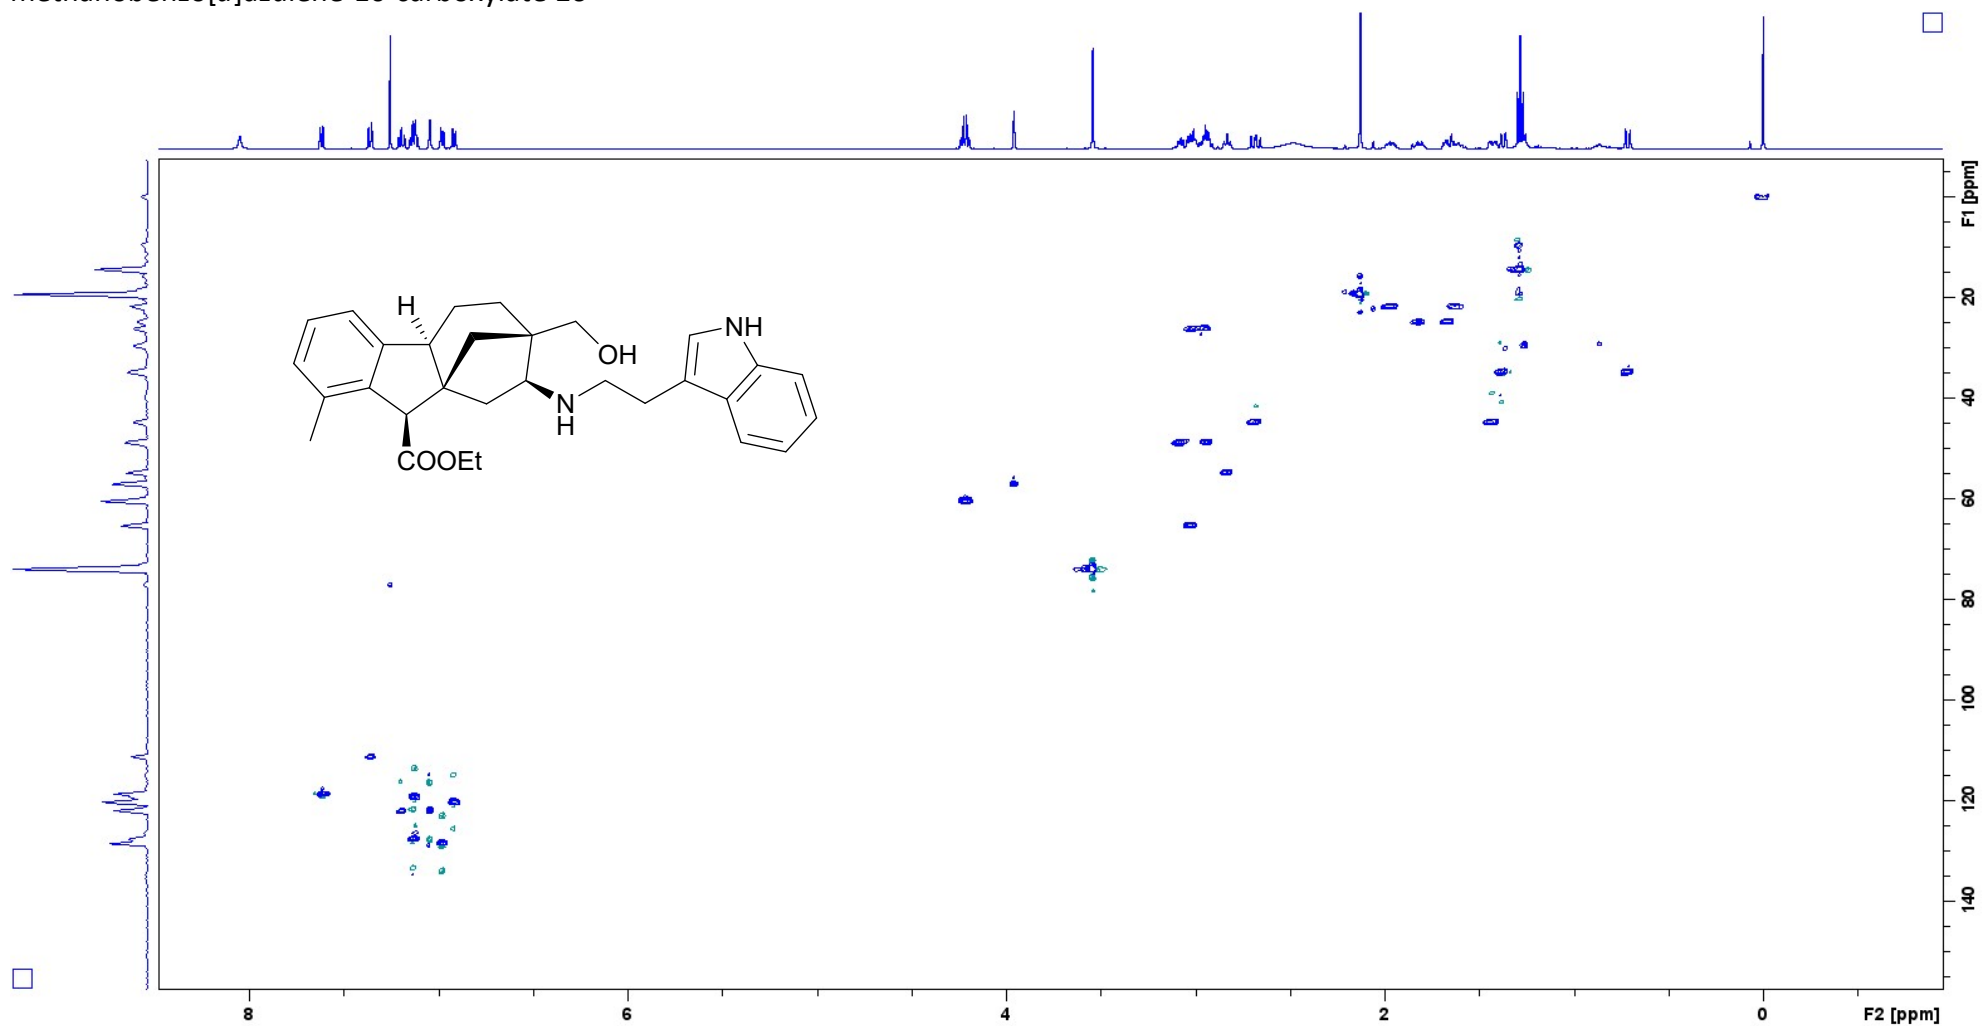

HMBC of ethyl (4*b**S*,7*R*,8*S*,9*a**S*,10*R*)-8-((2-(1*H*-indol-3-yl)ethyl)amino)-7-(hydroxymethyl)-1-methyl-4*b*,6,7,8,9,10-hexahydro-5*H*-7,9*a*-methanobenzo[*a*]azulene-10-carboxylate **16**

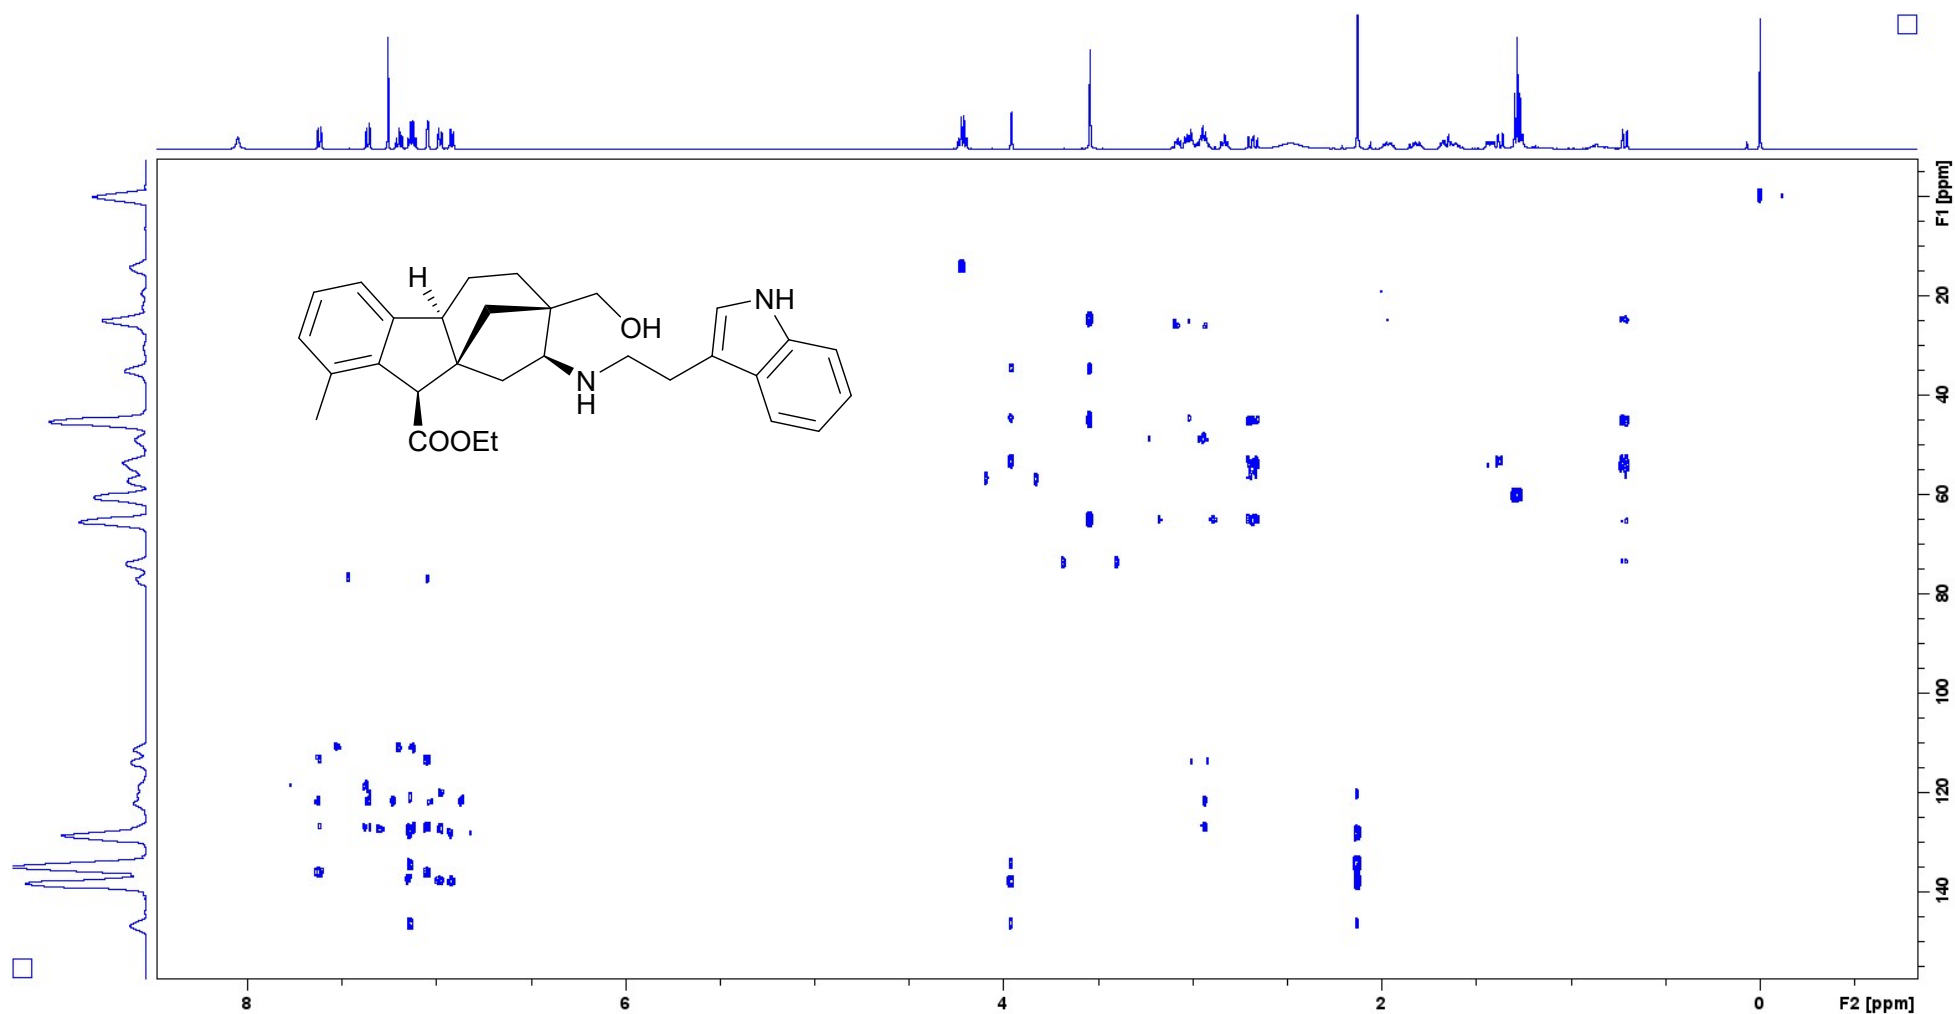

<sup>1</sup>H-NMR of ethyl (4b*S*,7*R*,8*S*,9*aS*,10*R*)-8-((3-(1*H*-imidazol-1-yl)propyl)amino)-7-(hydroxymethyl)-1-methyl-4*b*,6,7,8,9,10-hexahydro-5*H*-7,9*a*-methanobenzo[*a*]azulene-10-carboxylate **17**

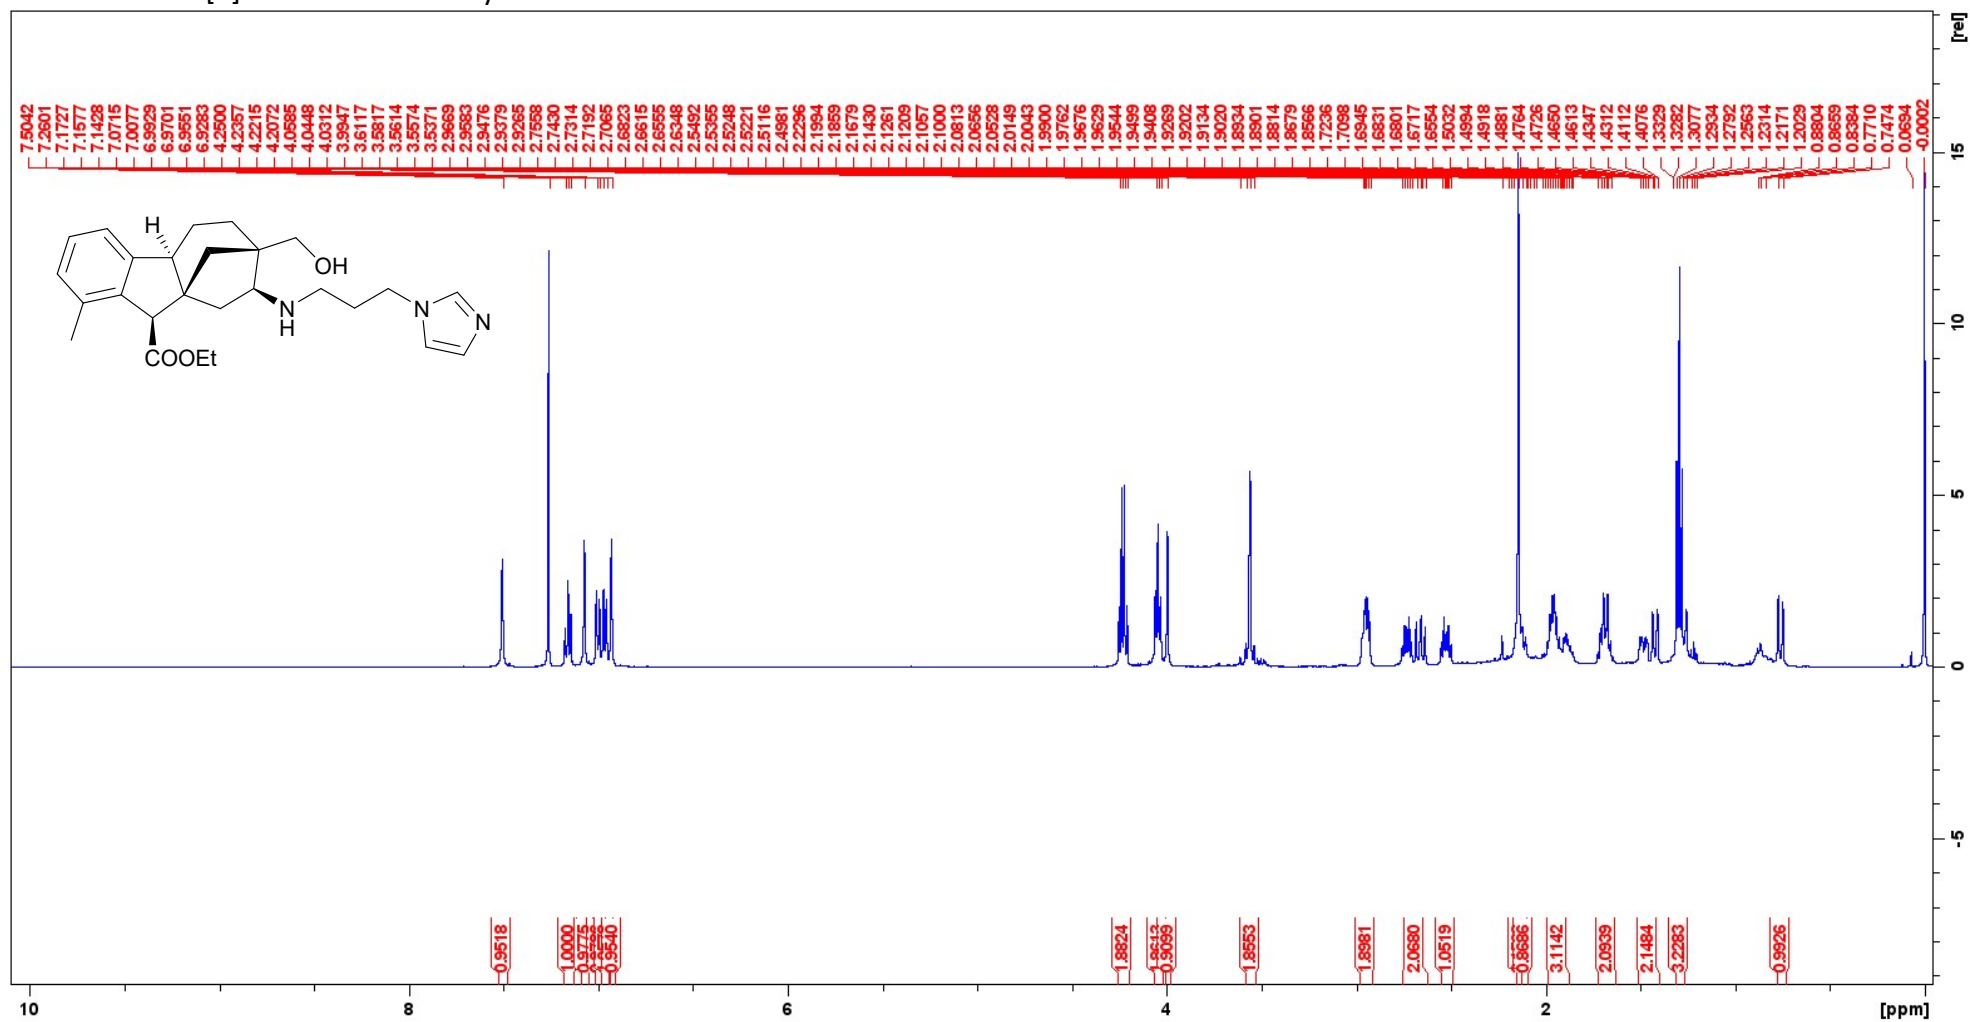

<sup>13</sup>C-NMR ethyl (4*b*S,7*R*,8*S*,9*a*S,10*R*)-8-((3-(1*H*-imidazol-1-yl)propyl)amino)-7-(hydroxymethyl)-1-methyl-4*b*,6,7,8,9,10-hexahydro-5*H*-7,9*a*-methanobenzo[*a*]azulene-10-carboxylate **17**

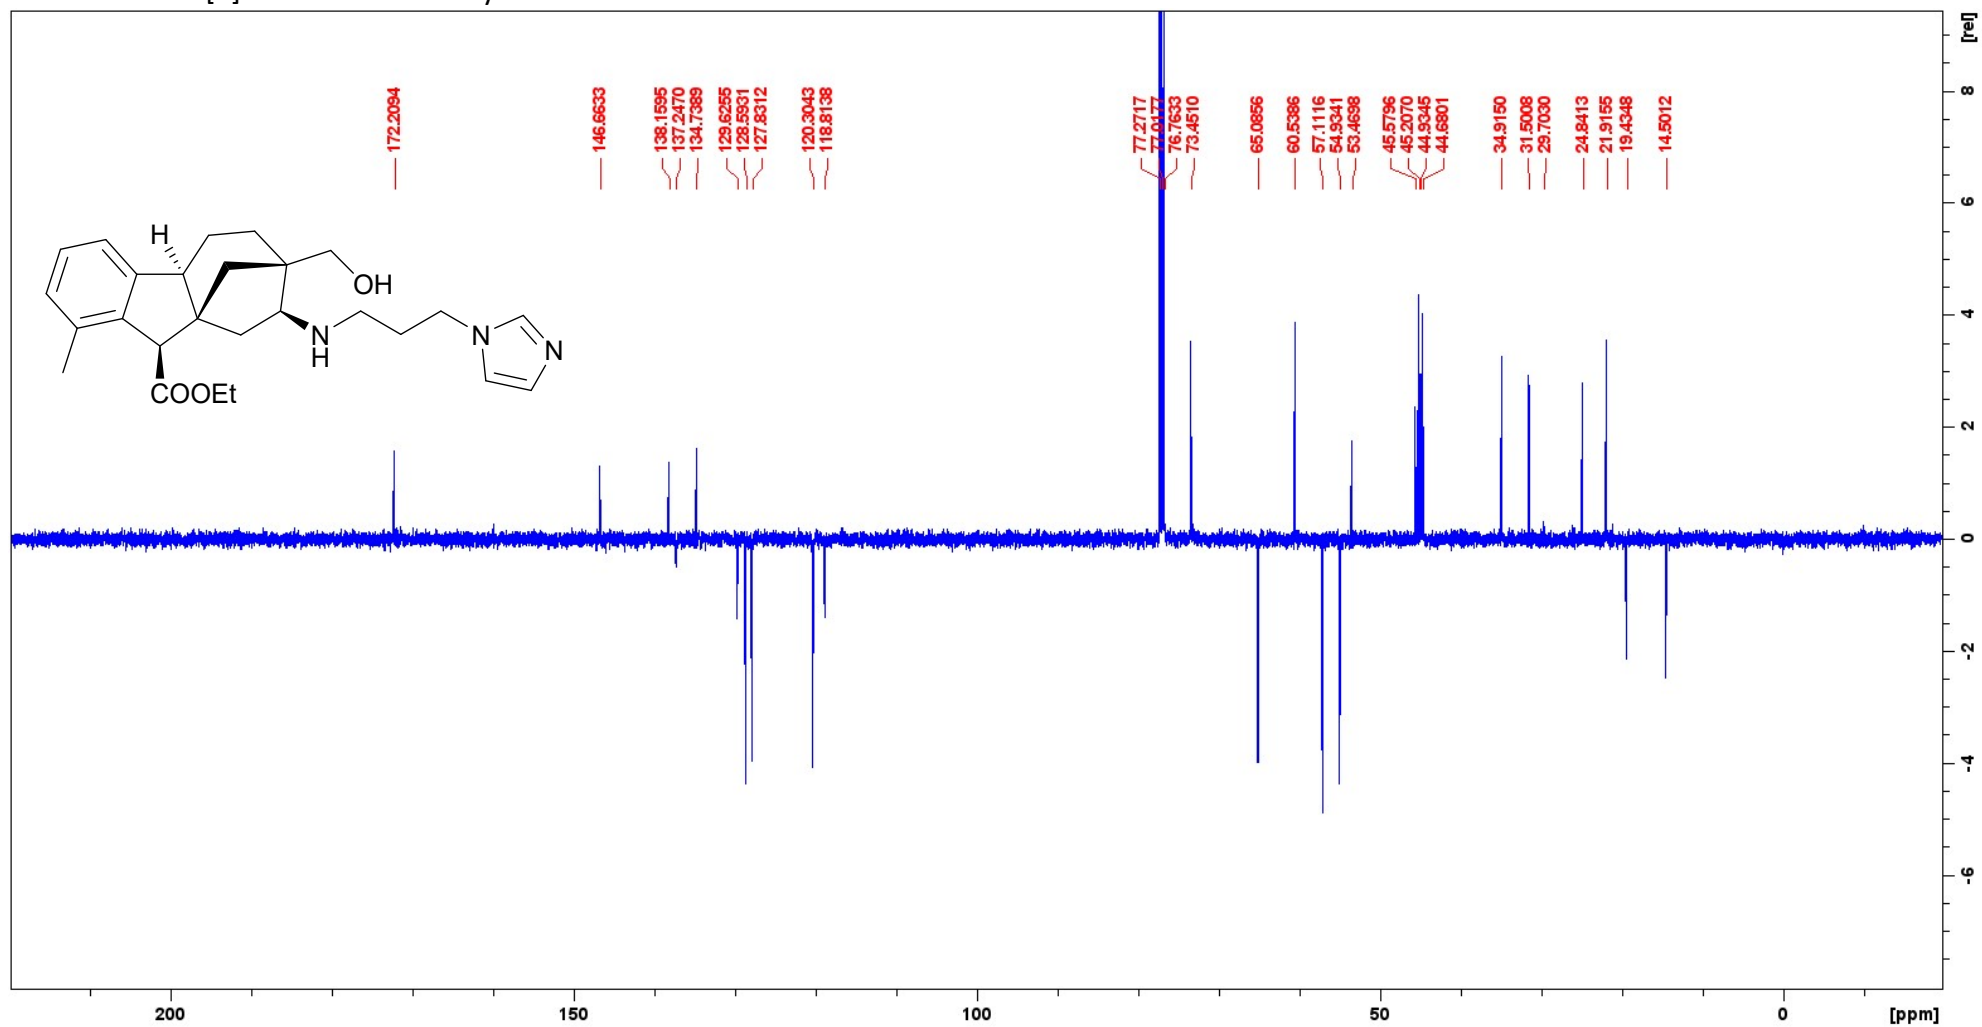

COSY of ethyl (4*b**S*,7*R*,8*S*,9*a**S*,10*R*)-8-((3-(1*H*-imidazol-1-yl)propyl)amino)-7-(hydroxymethyl)-1-methyl-4*b*,6,7,8,9,10-hexahydro-5*H*-7,9*a*-methanobenzo[*a*]azulene-10-carboxylate **17**

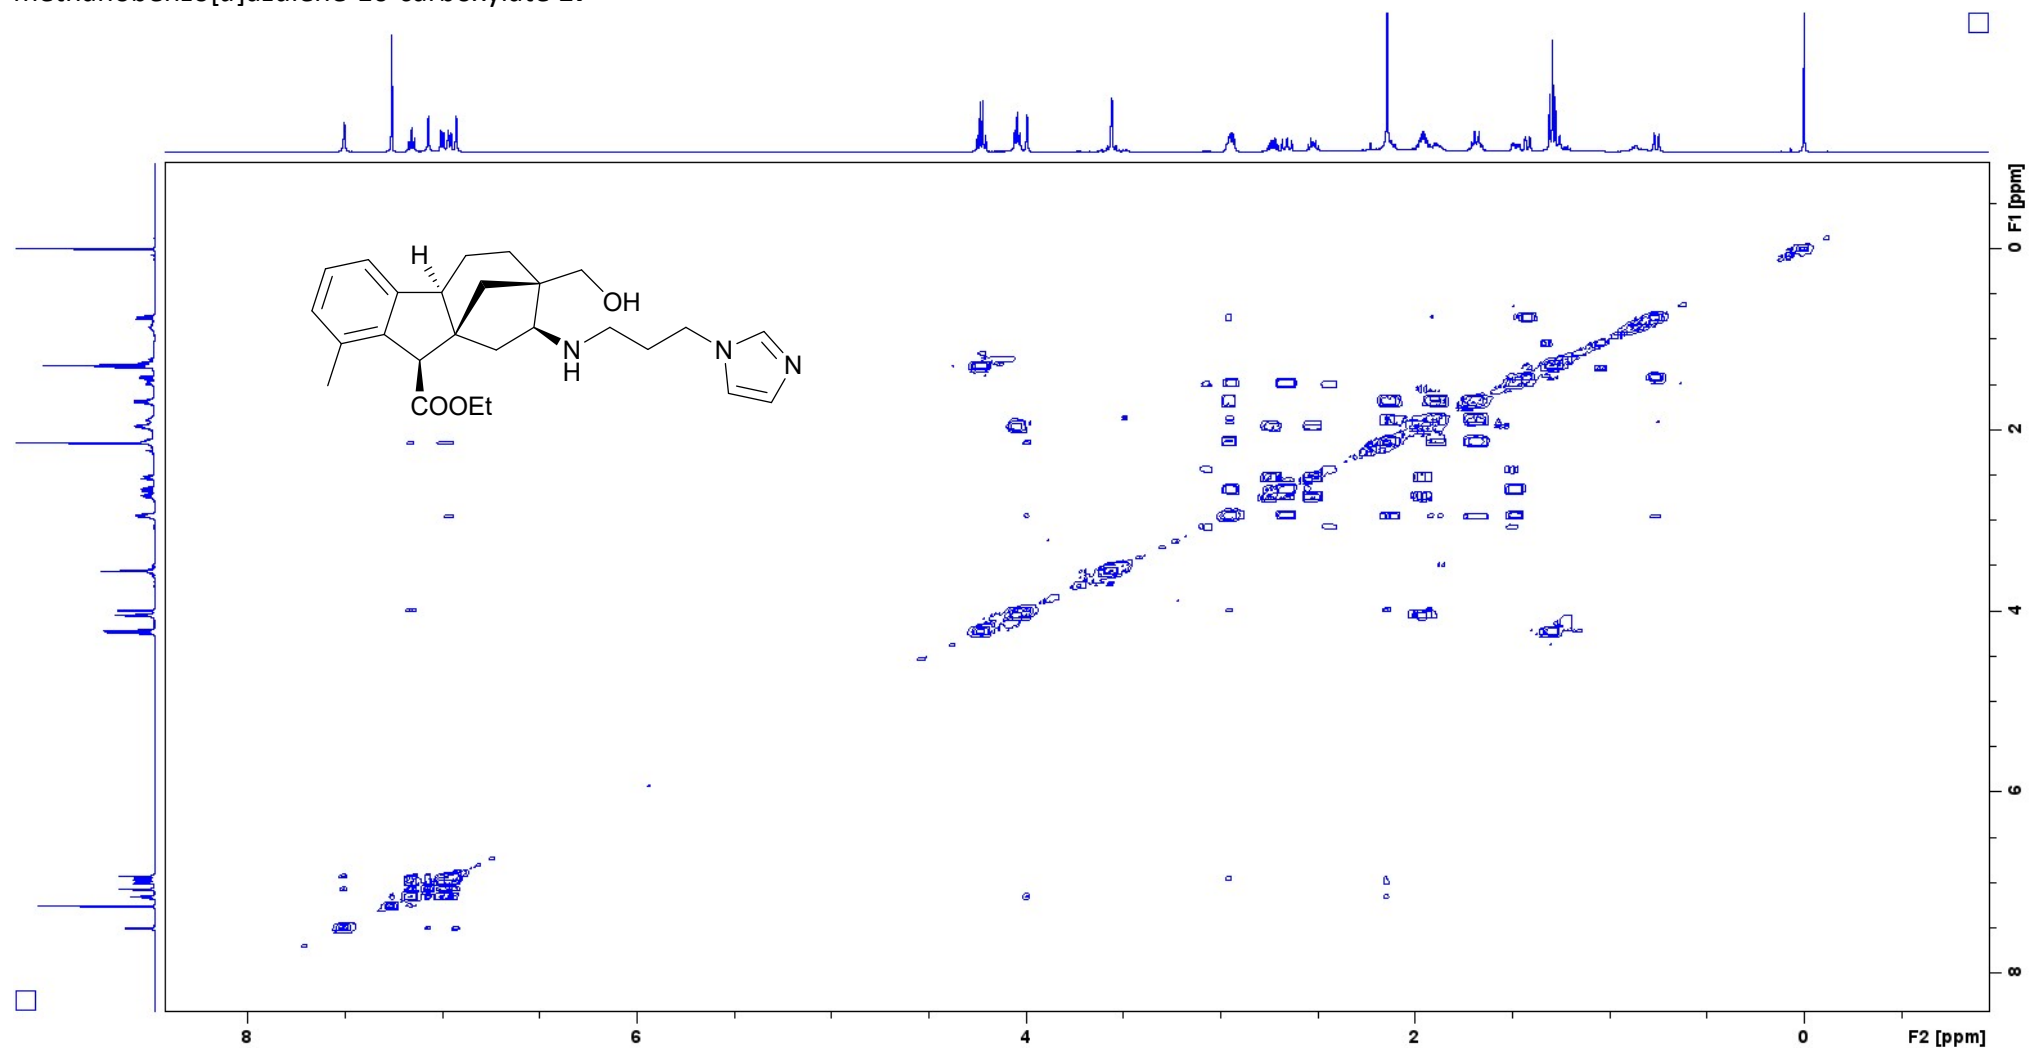

NOESY of ethyl (4*b**S*,7*R*,8*S*,9*a**S*,10*R*)-8-((3-(1*H*-imidazol-1-yl)propyl)amino)-7-(hydroxymethyl)-1-methyl-4*b*,6,7,8,9,10-hexahydro-5*H*-7,9*a*-methanobenzo[*a*]azulene-10-carboxylate **17**

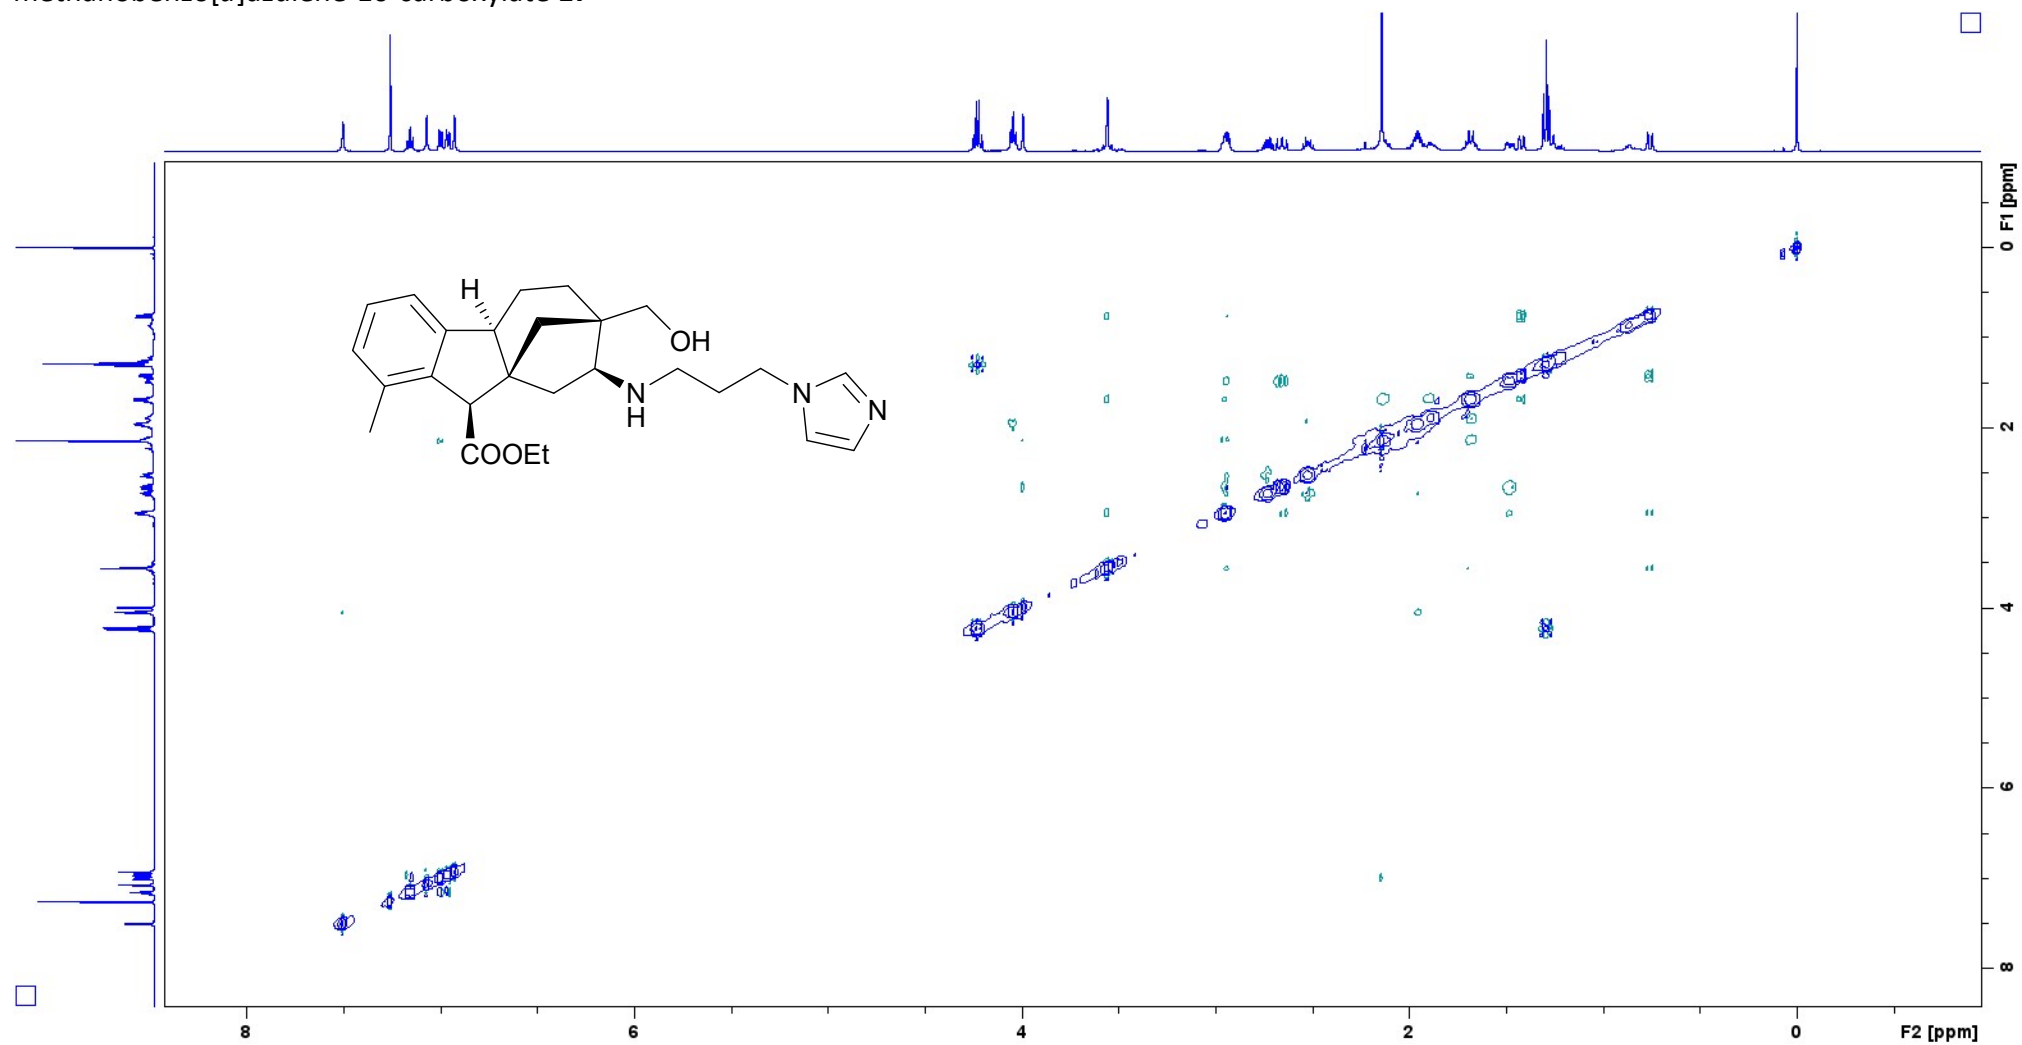

HSQC of ethyl (4*b*S,7*R*,8*S*,9*a*S,10*R*)-8-((3-(1*H*-imidazol-1-yl)propyl)amino)-7-(hydroxymethyl)-1-methyl-4*b*,6,7,8,9,10-hexahydro-5*H*-7,9*a*-methanobenzo[*a*]azulene-10-carboxylate **17**

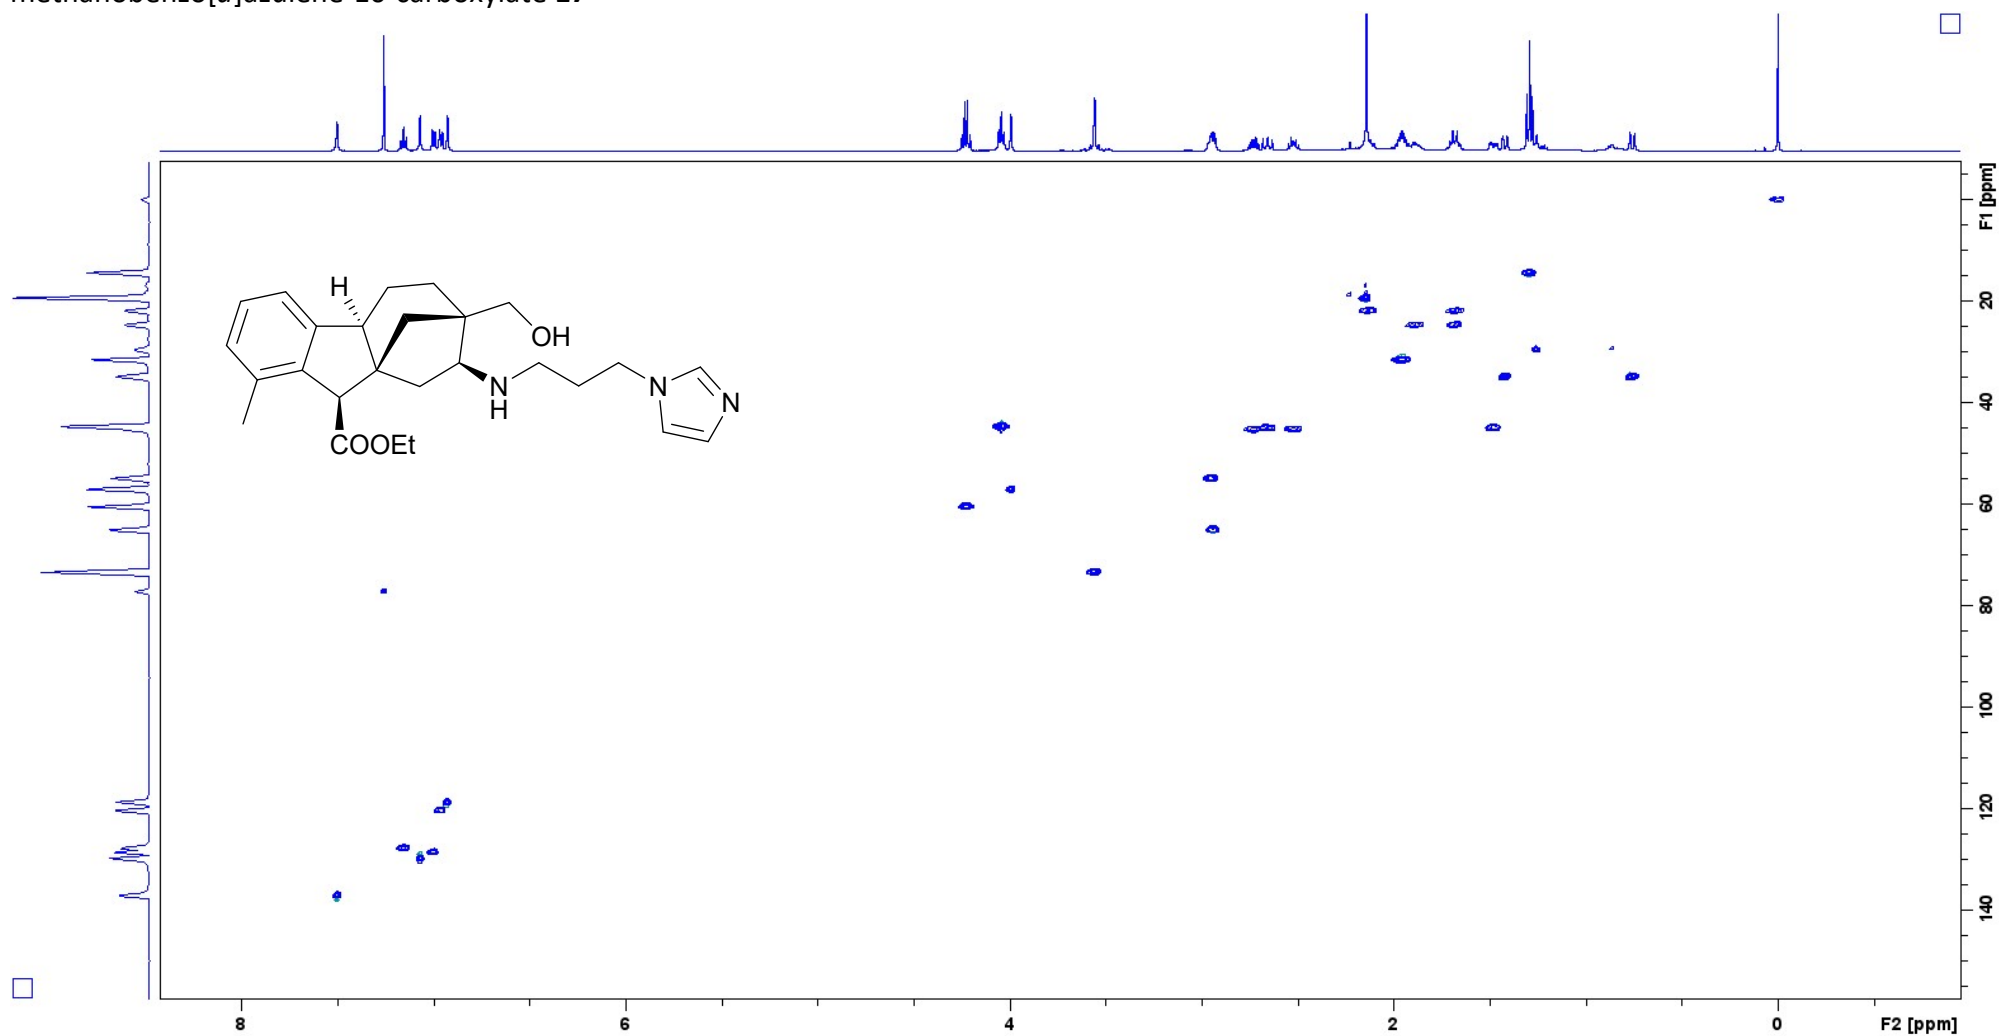

HMBC of ethyl (4*b*S,7*R*,8*S*,9*a*S,10*R*)-8-((3-(1*H*-imidazol-1-yl)propyl)amino)-7-(hydroxymethyl)-1-methyl-4*b*,6,7,8,9,10-hexahydro-5*H*-7,9*a*-methanobenzo[*a*]azulene-10-carboxylate **17**

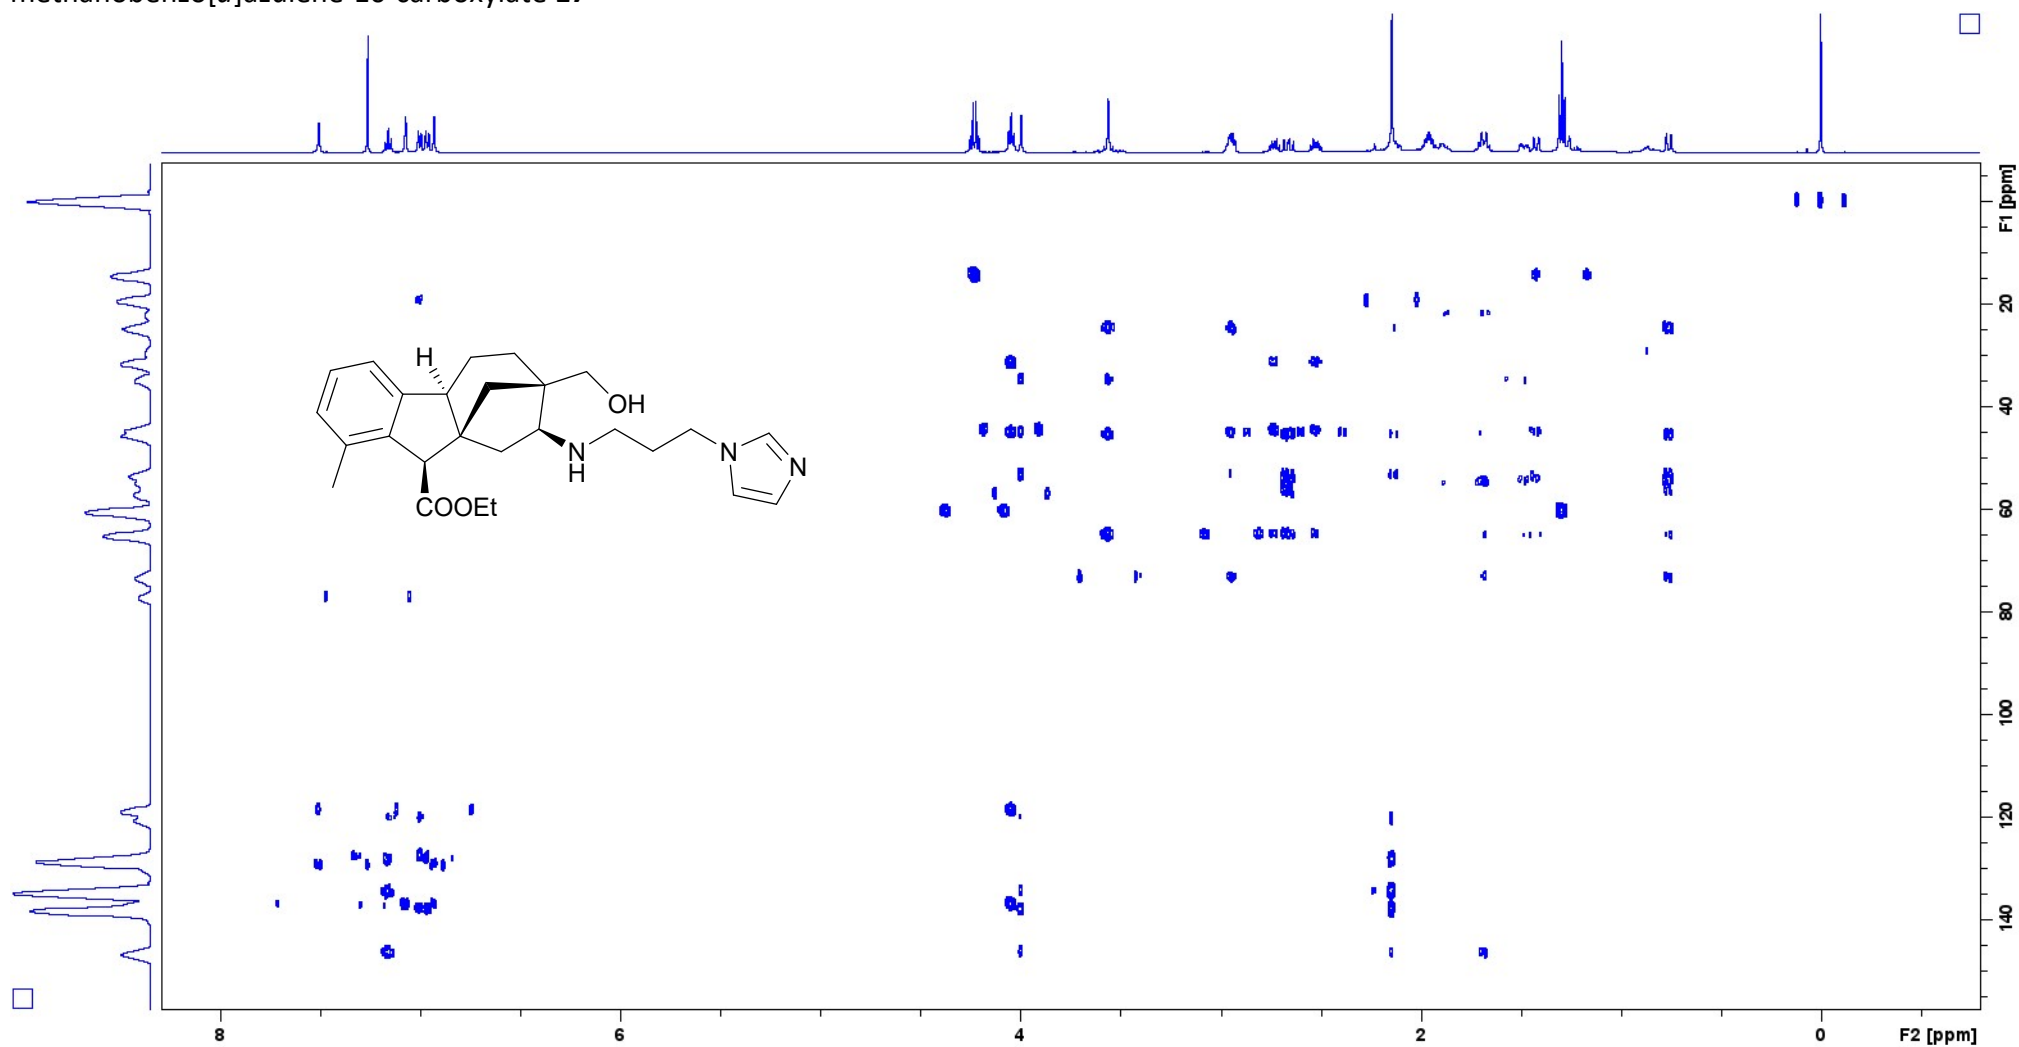



<sup>1</sup>H-NMR of ethyl (4*bS*,7*R*,8*S*,9*aS*,10*R*)-8-((5-bromo-2-hydroxybenzyl)amino)-7-(hydroxymethyl)-1-methyl-4*b*,6,7,8,9,10-hexahydro-5*H*-7,9*a*-methanobenzo[*a*]azulene-10-carboxylate **18**

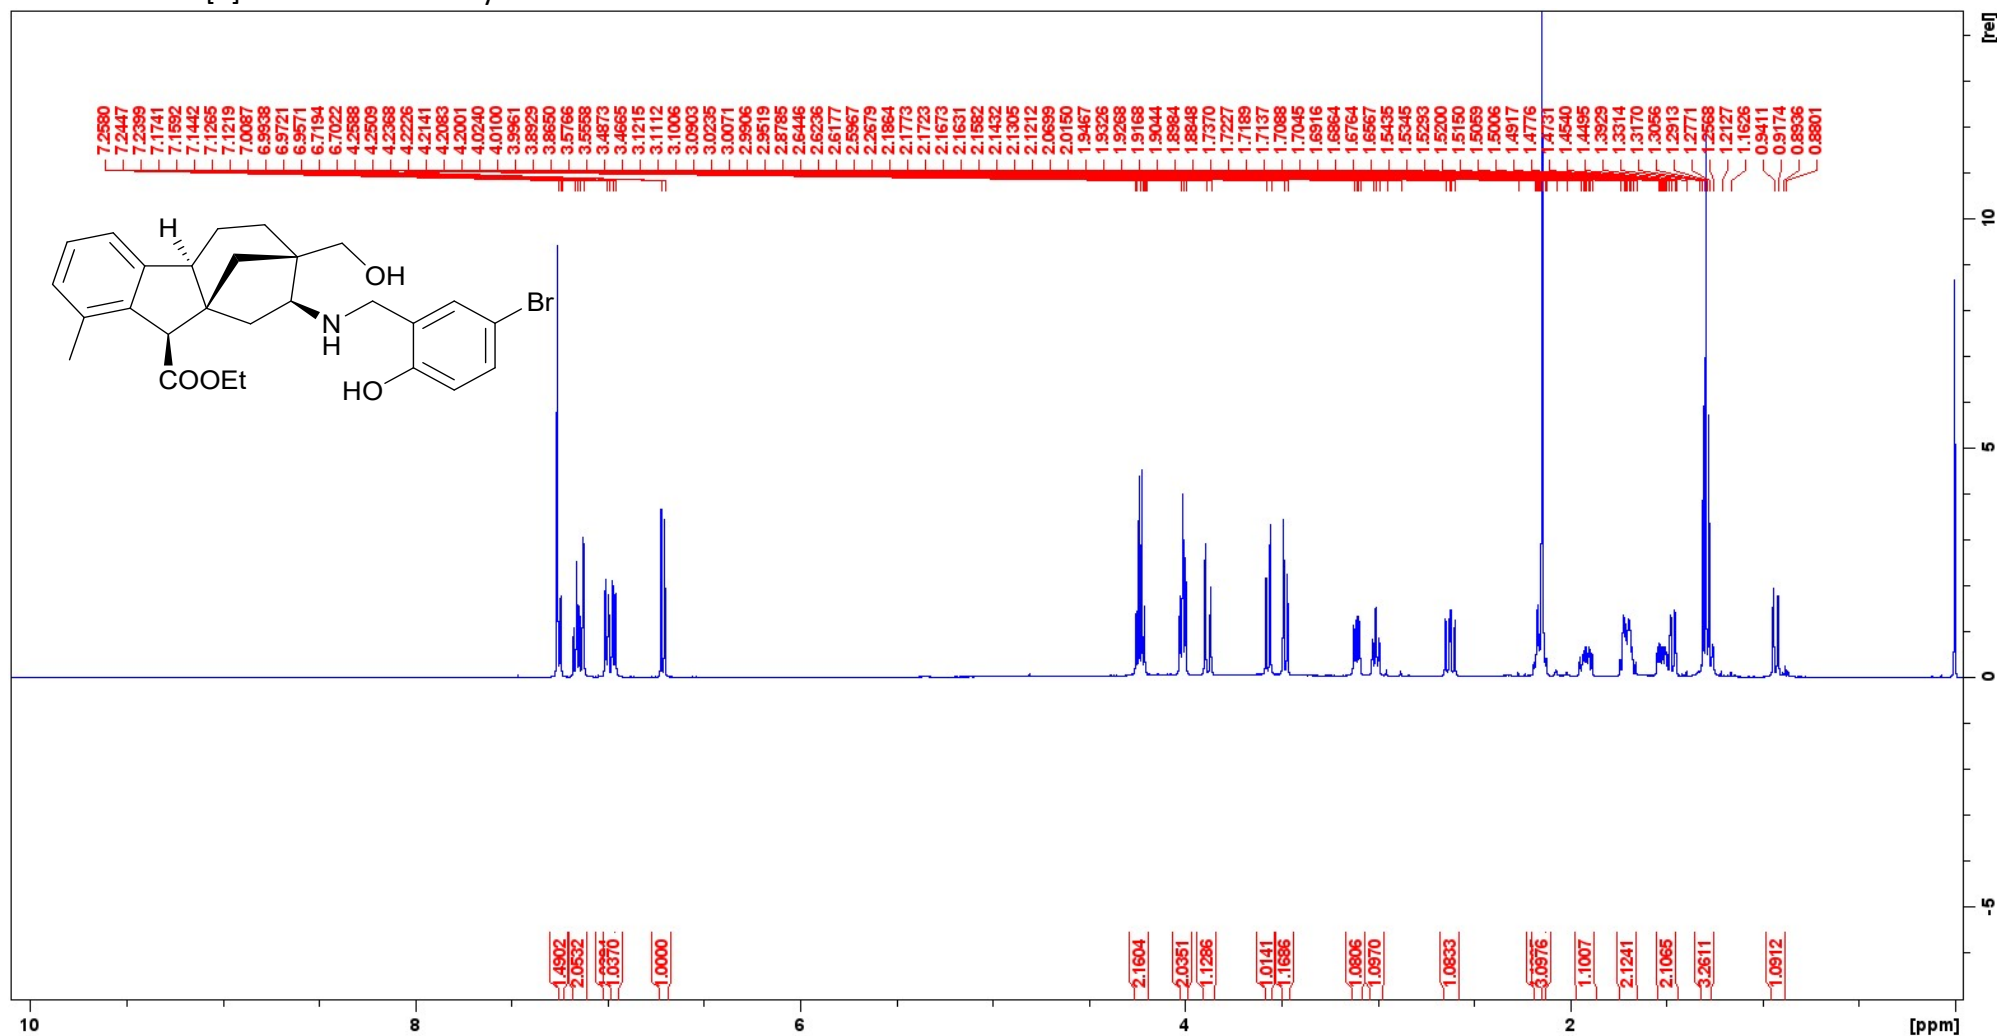

<sup>13</sup>C-NMR of ethyl (4*b**S*,7*R*,8*S*,9*a**S*,10*R*)-8-((5-bromo-2-hydroxybenzyl)amino)-7-(hydroxymethyl)-1-methyl-4*b*,6,7,8,9,10-hexahydro-5*H*-7,9a-methanobenzo[*a*]azulene-10-carboxylate **18**

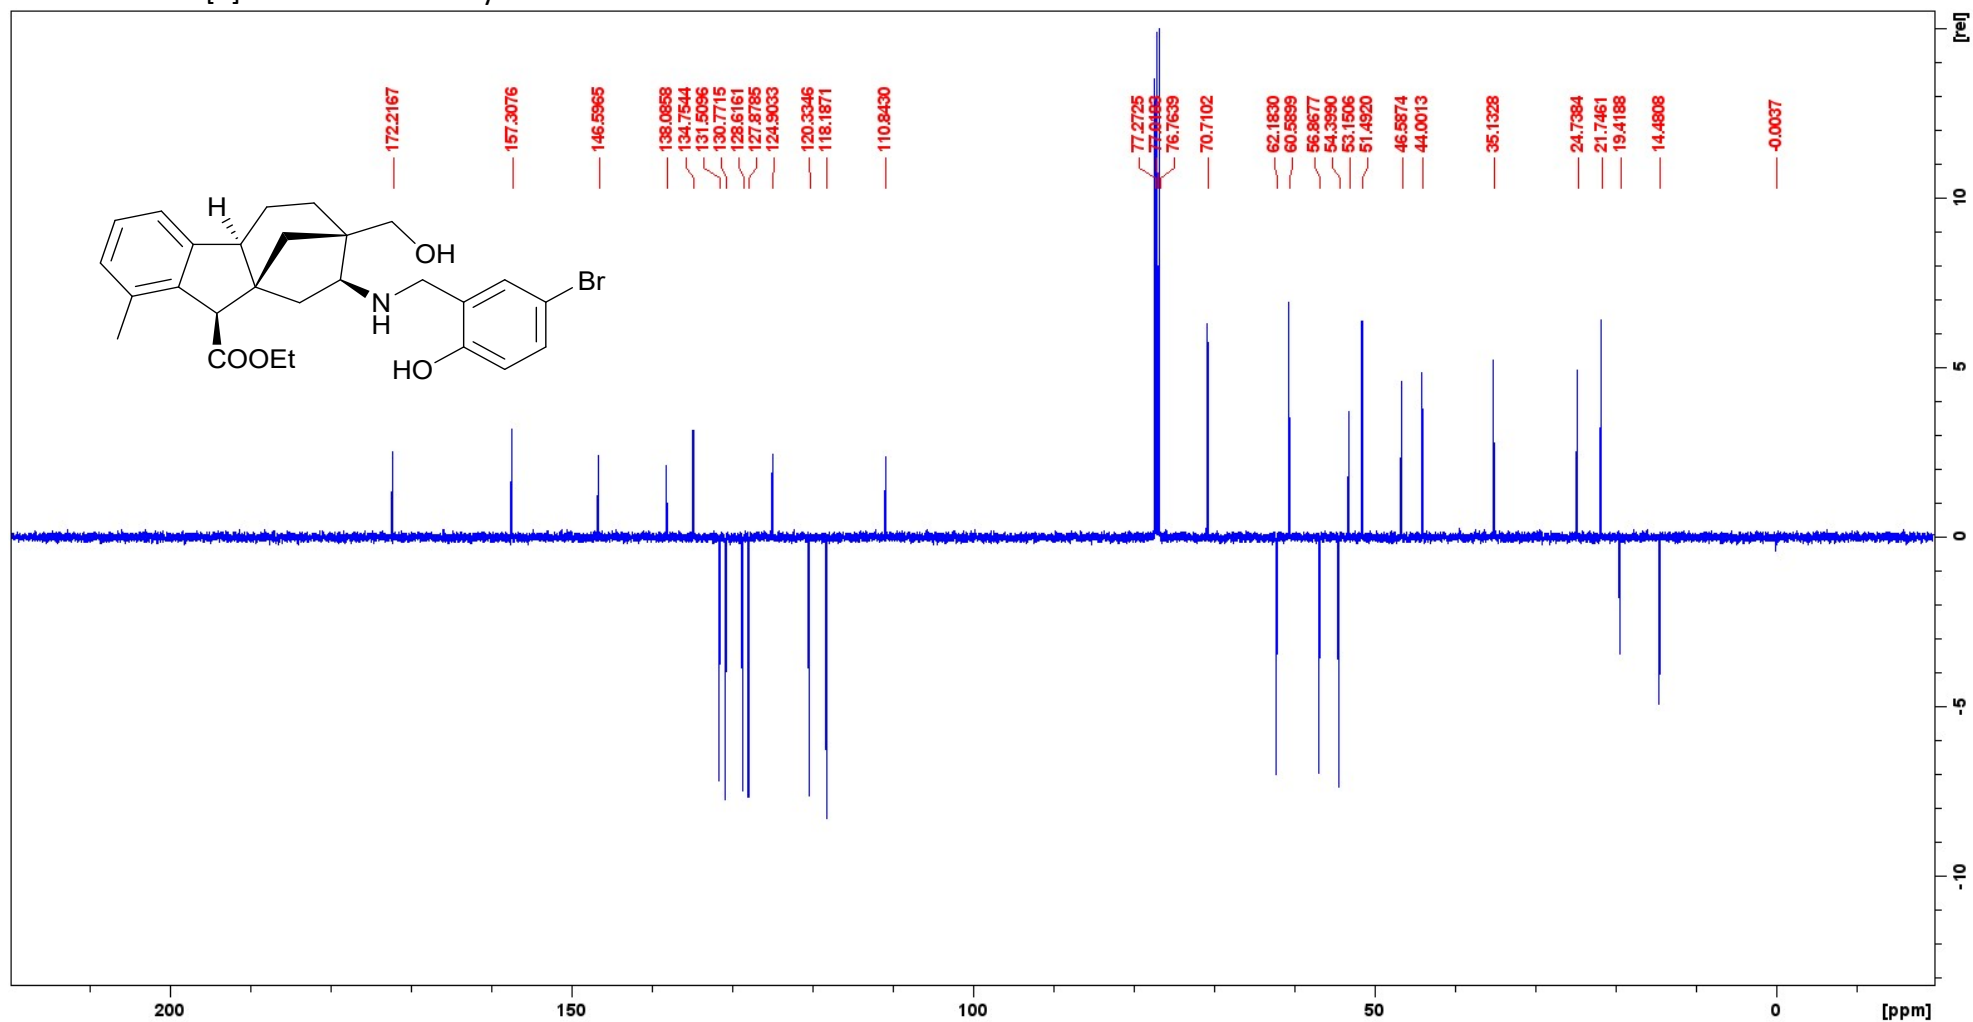

COSY of ethyl (4*S*,7*R*,8*S*,9*aS*,10*R*)-8-((5-bromo-2-hydroxybenzyl)amino)-7-(hydroxymethyl)-1-methyl-4*b*,6,7,8,9,10-hexahydro-5*H*-7,9*a*-methanobenzo[*a*]azulene-10-carboxylate **18**

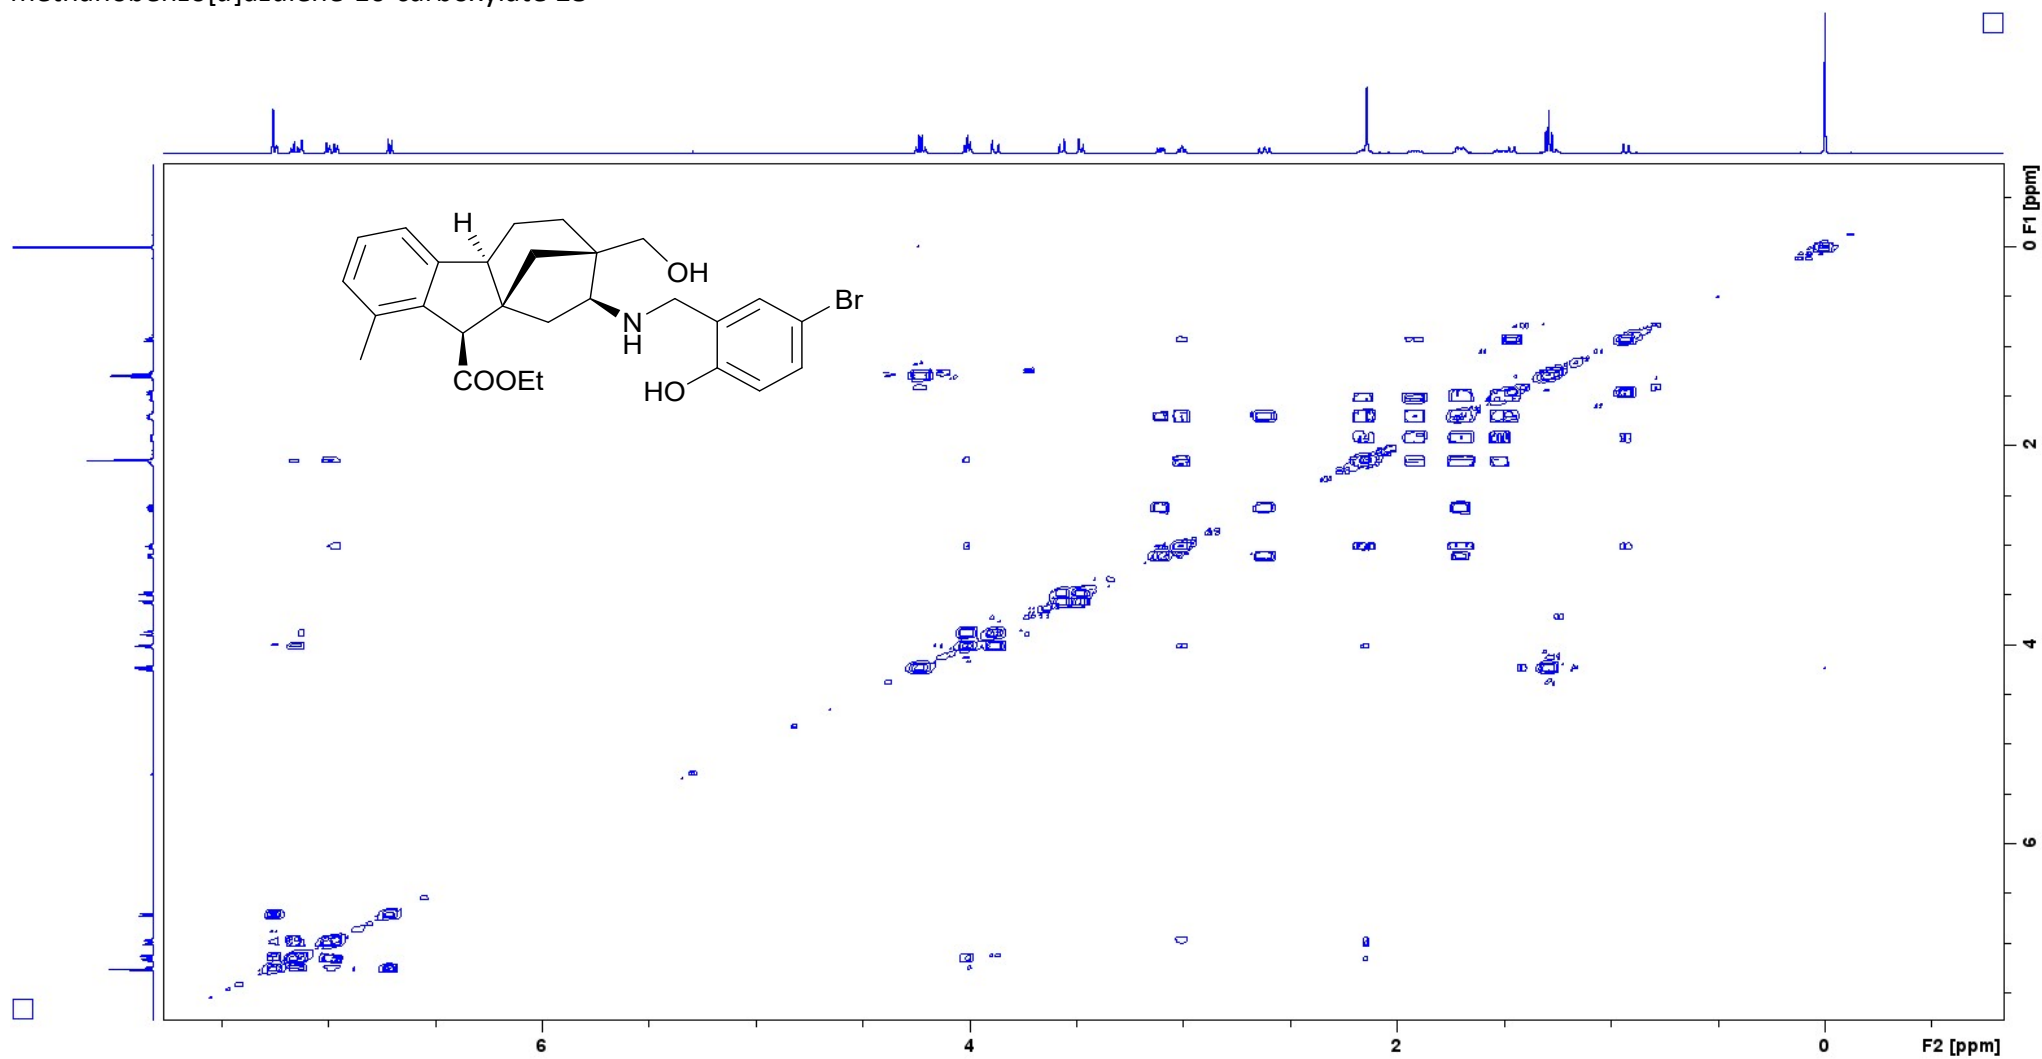

NOESY of ethyl (4*S*,7*R*,8*S*,9*aS*,10*R*)-8-((5-bromo-2-hydroxybenzyl)amino)-7-(hydroxymethyl)-1-methyl-4*b*,6,7,8,9,10-hexahydro-5*H*-7,9*a*-methanobenzo[*a*]azulene-10-carboxylate **18**

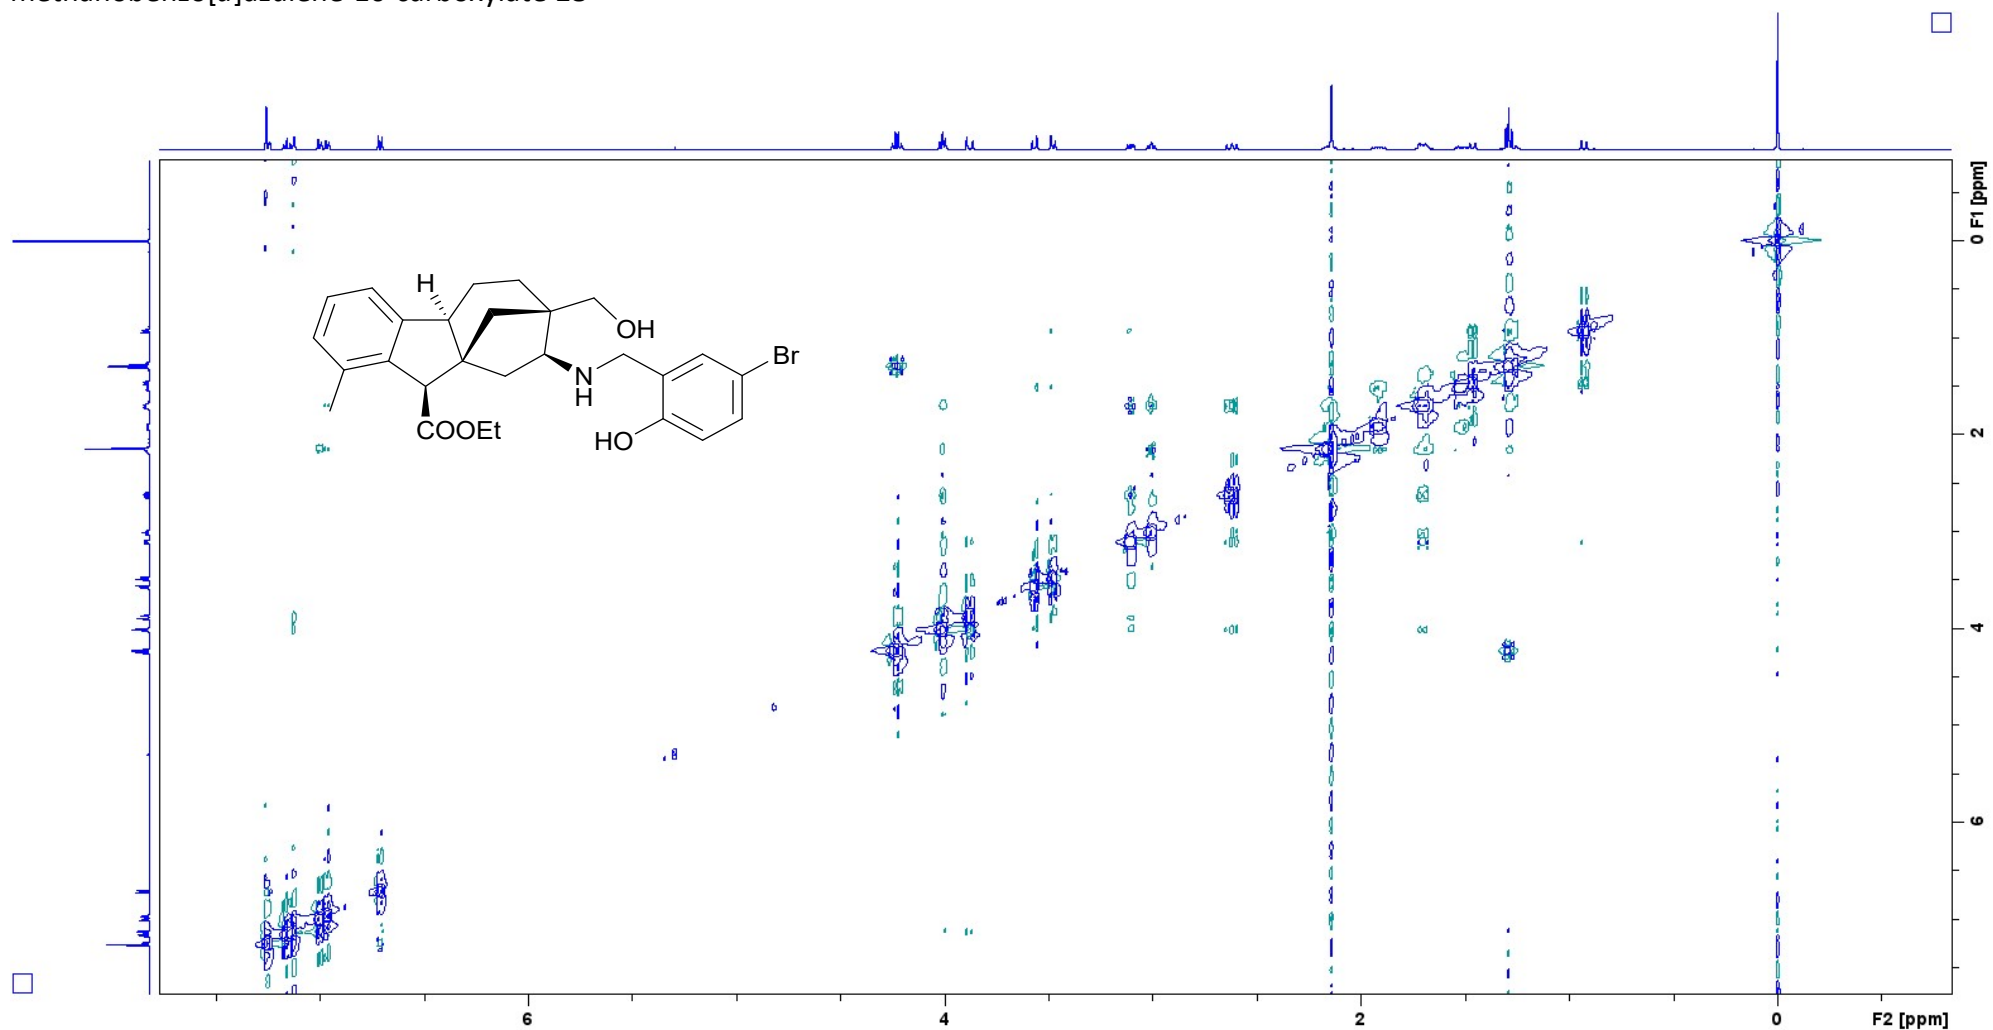

HSQC of ethyl (4*S*,7*R*,8*S*,9*aS*,10*R*)-8-((5-bromo-2-hydroxybenzyl)amino)-7-(hydroxymethyl)-1-methyl-4*b*,6,7,8,9,10-hexahydro-5*H*-7,9*a*-methanobenzo[*a*]azulene-10-carboxylate **18**

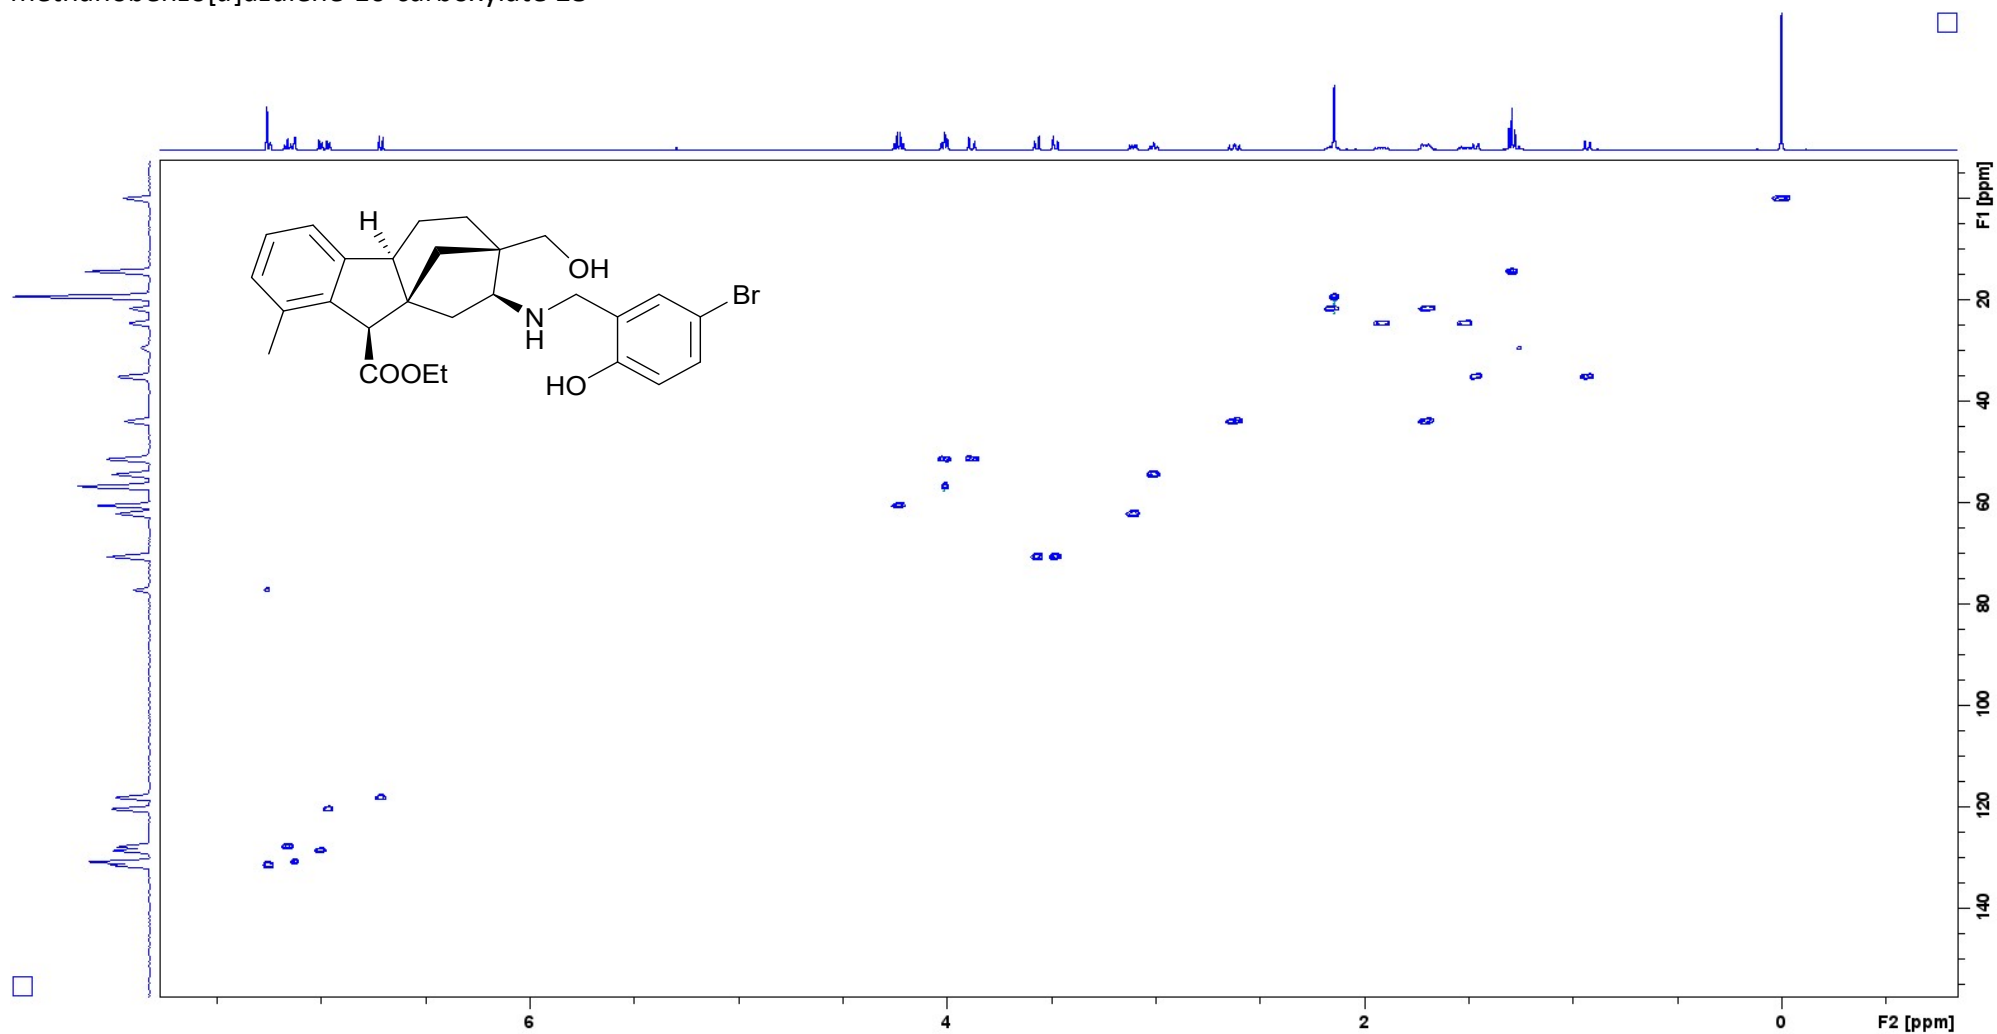

HMBC of ethyl (4*b*,7*R*,8*S*,9*a*,10*R*)-8-((5-bromo-2-hydroxybenzyl)amino)-7-(hydroxymethyl)-1-methyl-4*b*,6,7,8,9,10-hexahydro-5*H*-7,9*a*-methanobenzo[*a*]azulene-10-carboxylate **18**

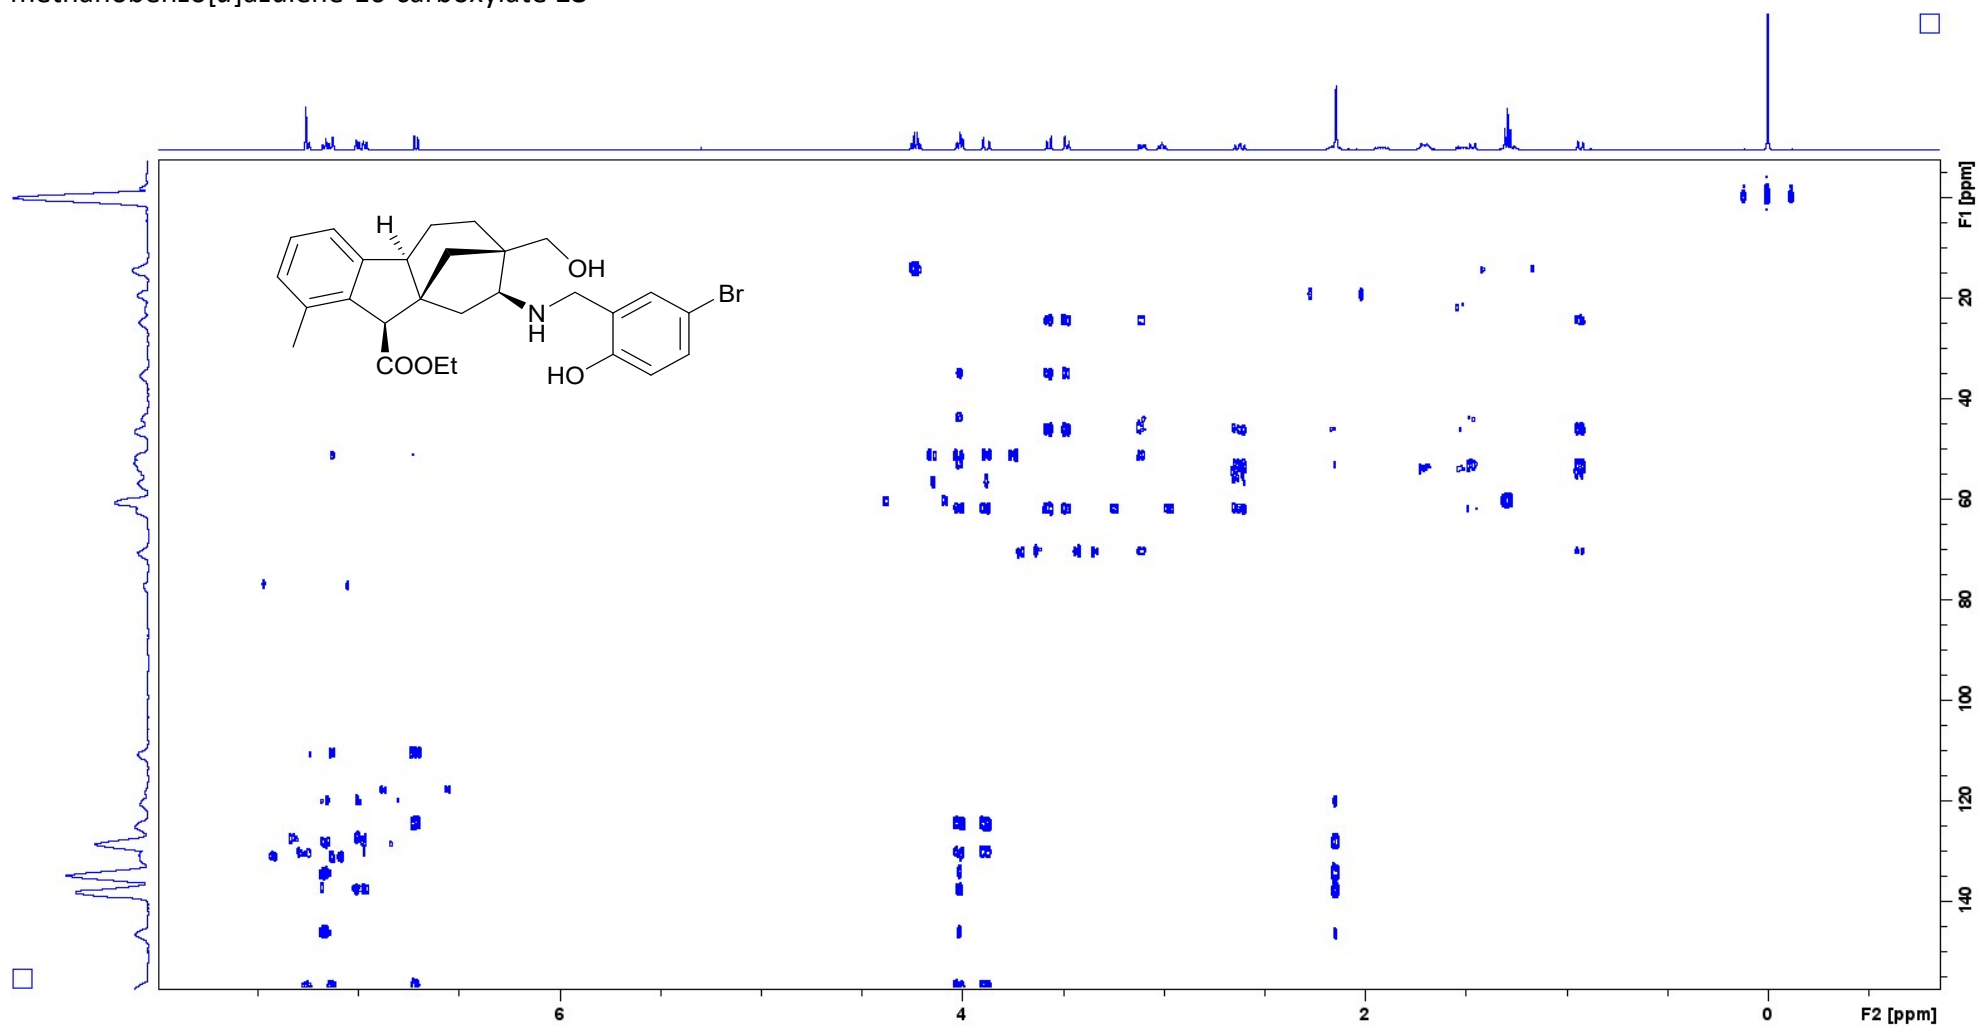

<sup>1</sup>H-NMR of ethyl (4*bS*,7*R*,8*S*,9*aS*,10*R*)-7-(hydroxymethyl)-1-methyl-8-((quinolin-2-ylmethyl)amino)-4*b*,6,7,8,9,10-hexahydro-5*H*-7,9*a*-methanobenzo[*a*]azulene-10-carboxylate **19**

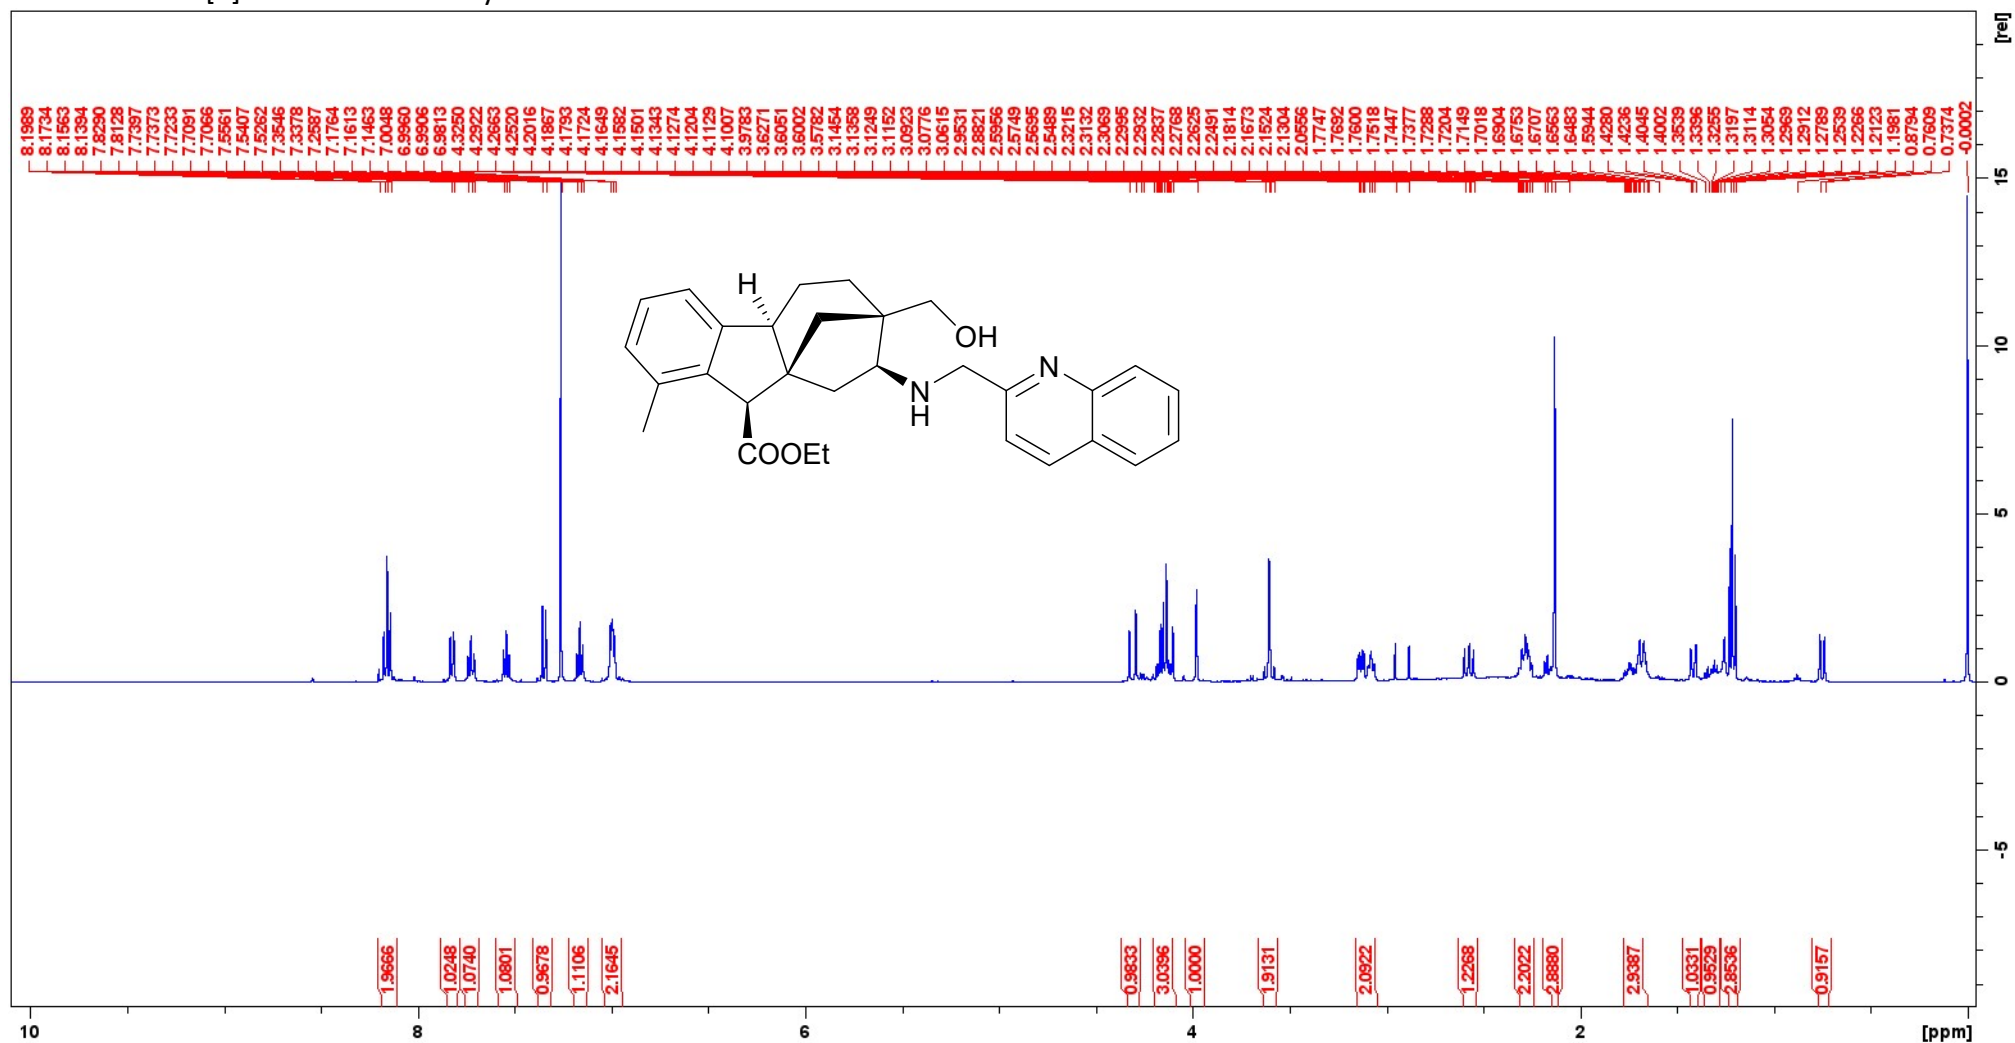

<sup>13</sup>C-NMR of ethyl (4*bS*,7*R*,8*S*,9*aS*,10*R*)-7-(hydroxymethyl)-1-methyl-8-((quinolin-2-ylmethyl)amino)-4*b*,6,7,8,9,10-hexahydro-5*H*-7,9*a*-methanobenzo[*a*]azulene-10-carboxylate **19**

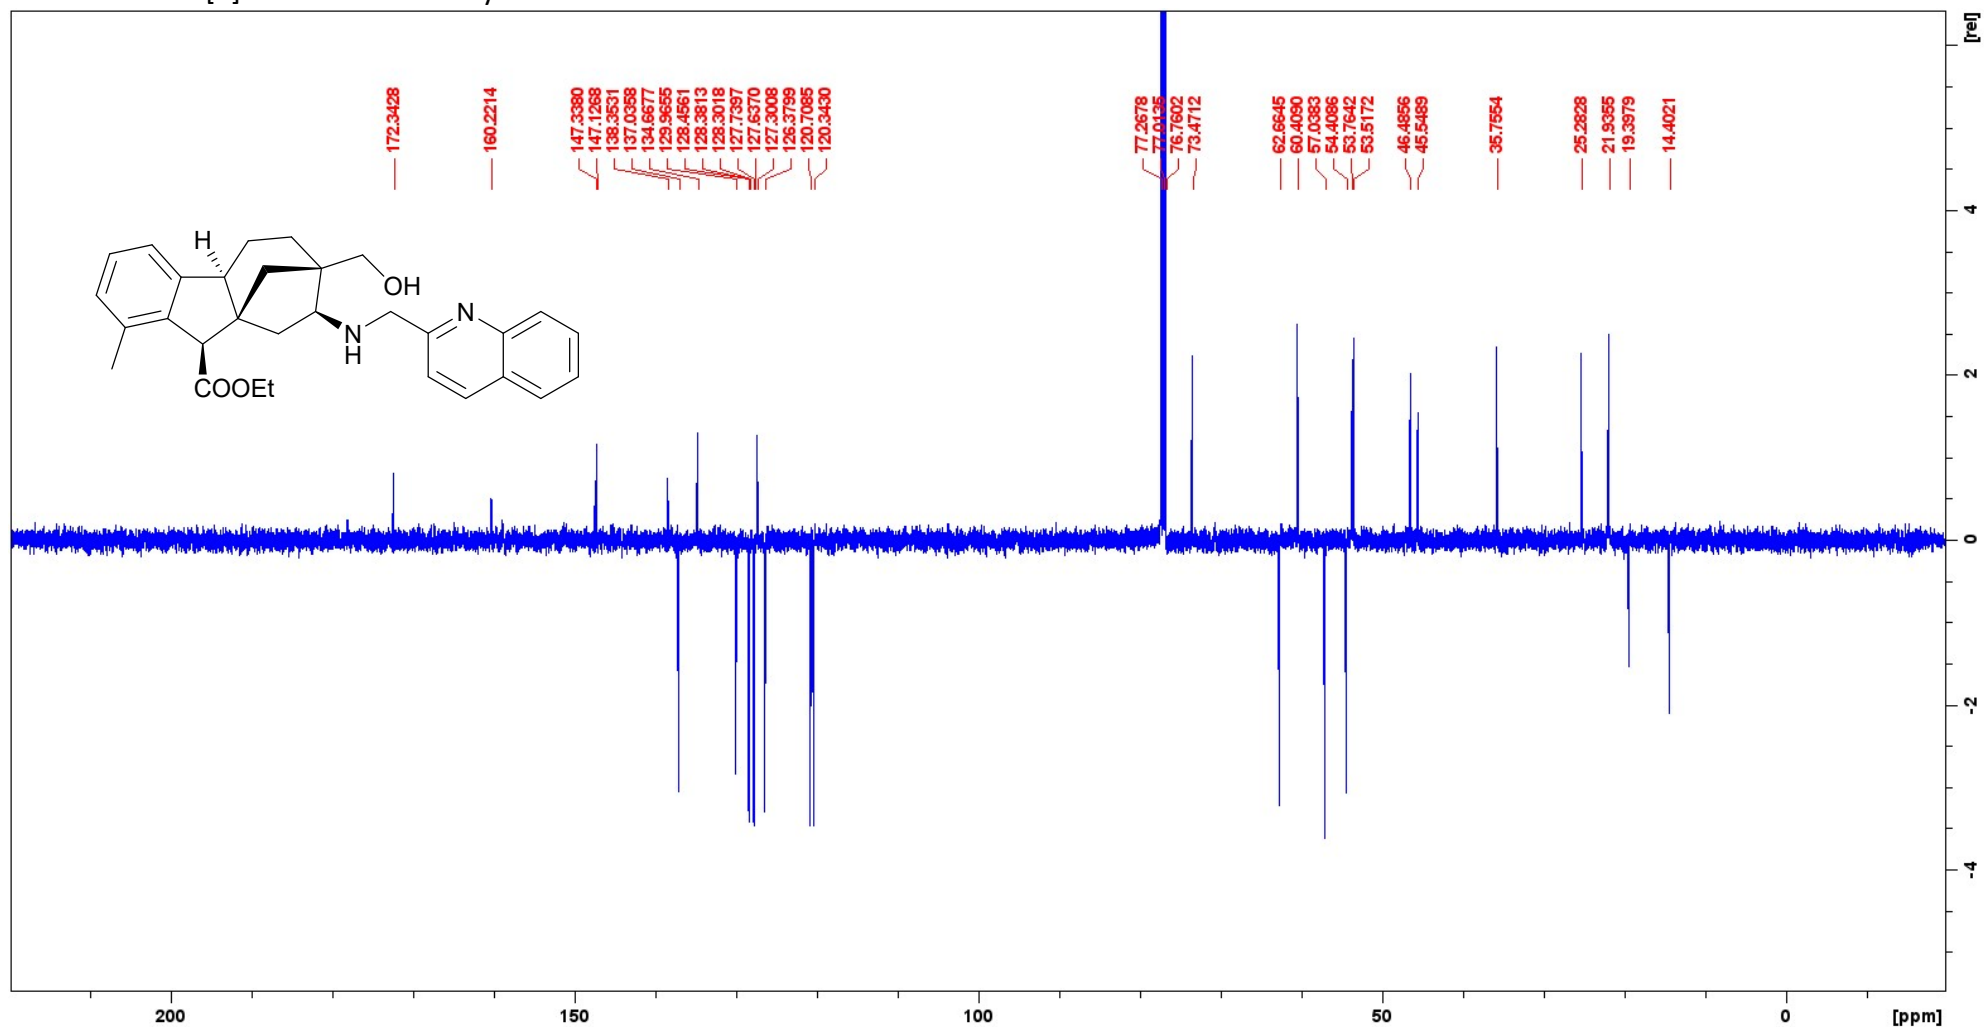



<sup>1</sup>H-NMR of ethyl (4*b**S*,7*R*,8*S*,9*a**S*,10*R*)-7-(hydroxymethyl)-1-methyl-8-((quinolin-4-ylmethyl)amino)-4*b*,6,7,8,9,10-hexahydro-5*H*-7,9*a*-methanobenzo[*a*]azulene-10-carboxylate **20**

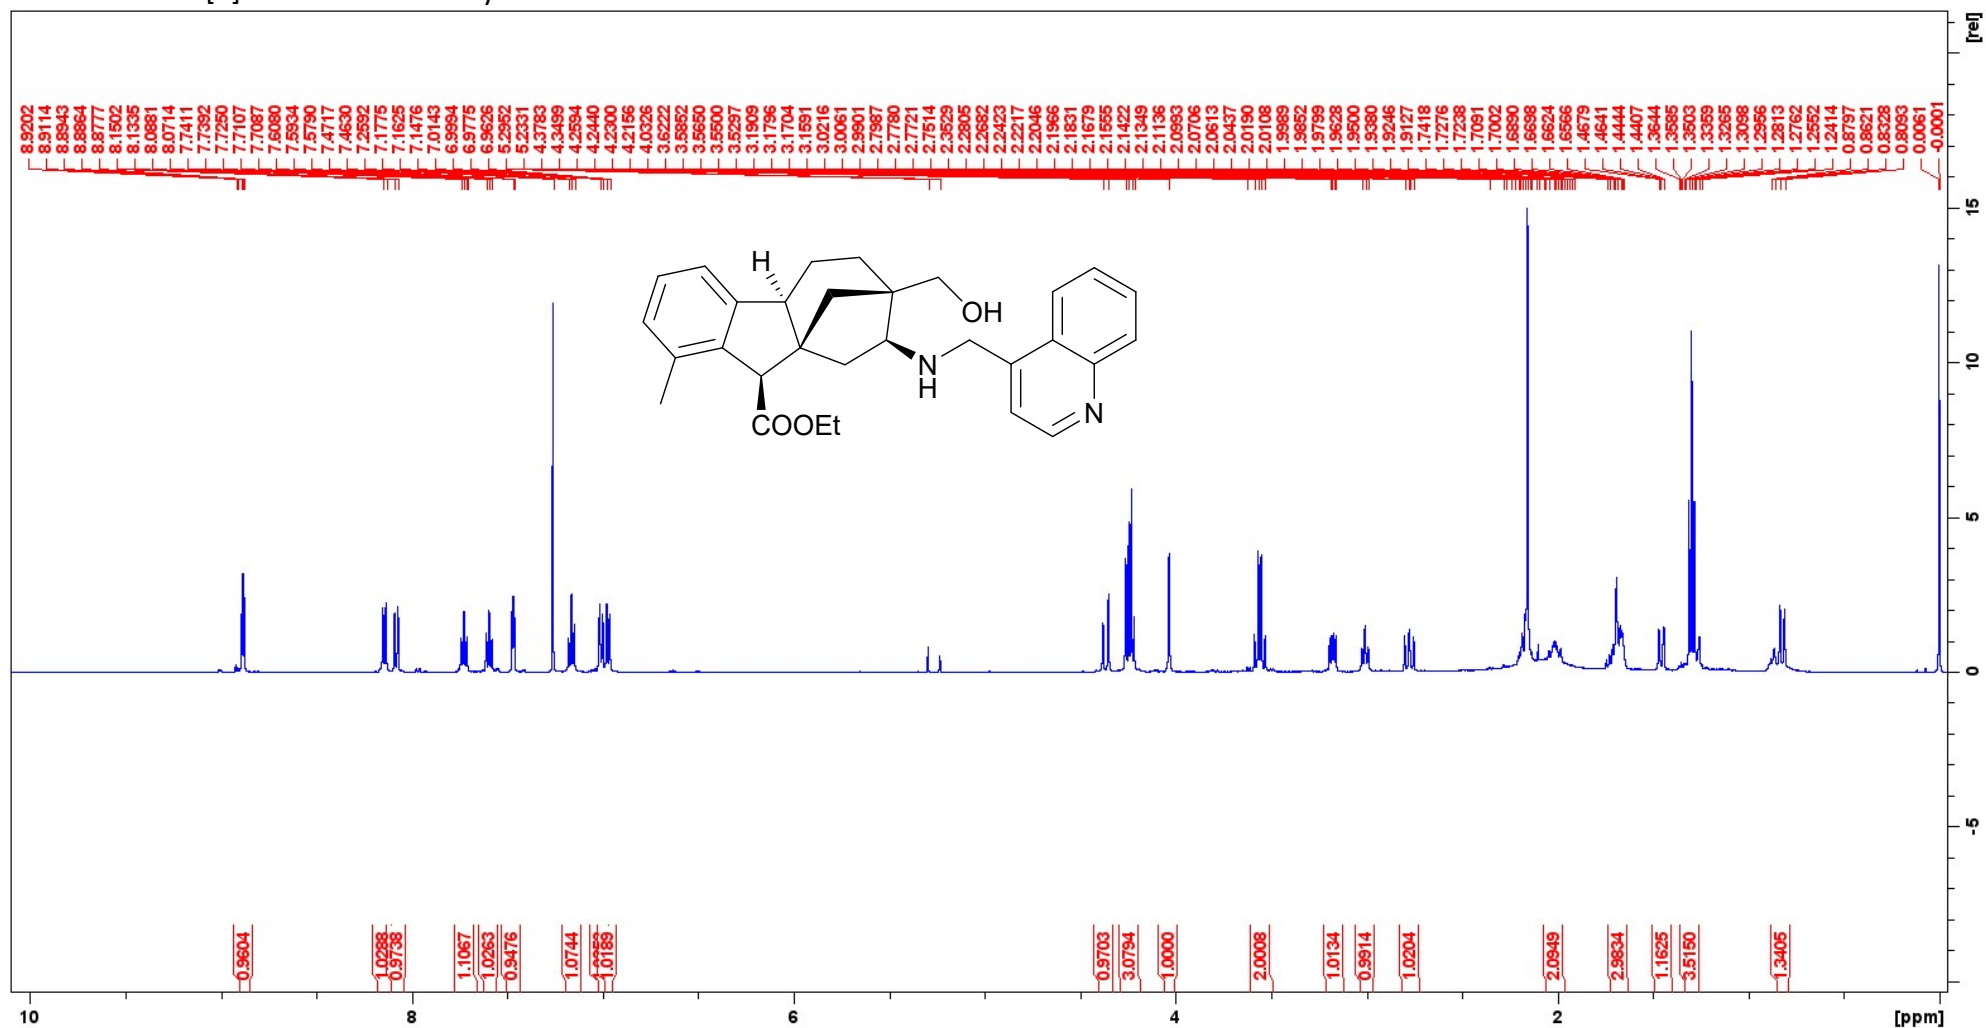

<sup>13</sup>C-NMR of ethyl (4*bS*,7*R*,8*S*,9*aS*,10*R*)-7-(hydroxymethyl)-1-methyl-8-((quinolin-4-ylmethyl)amino)-4*b*,6,7,8,9,10-hexahydro-5*H*-7,9*a*-methanobenzo[*a*]azulene-10-carboxylate **20**

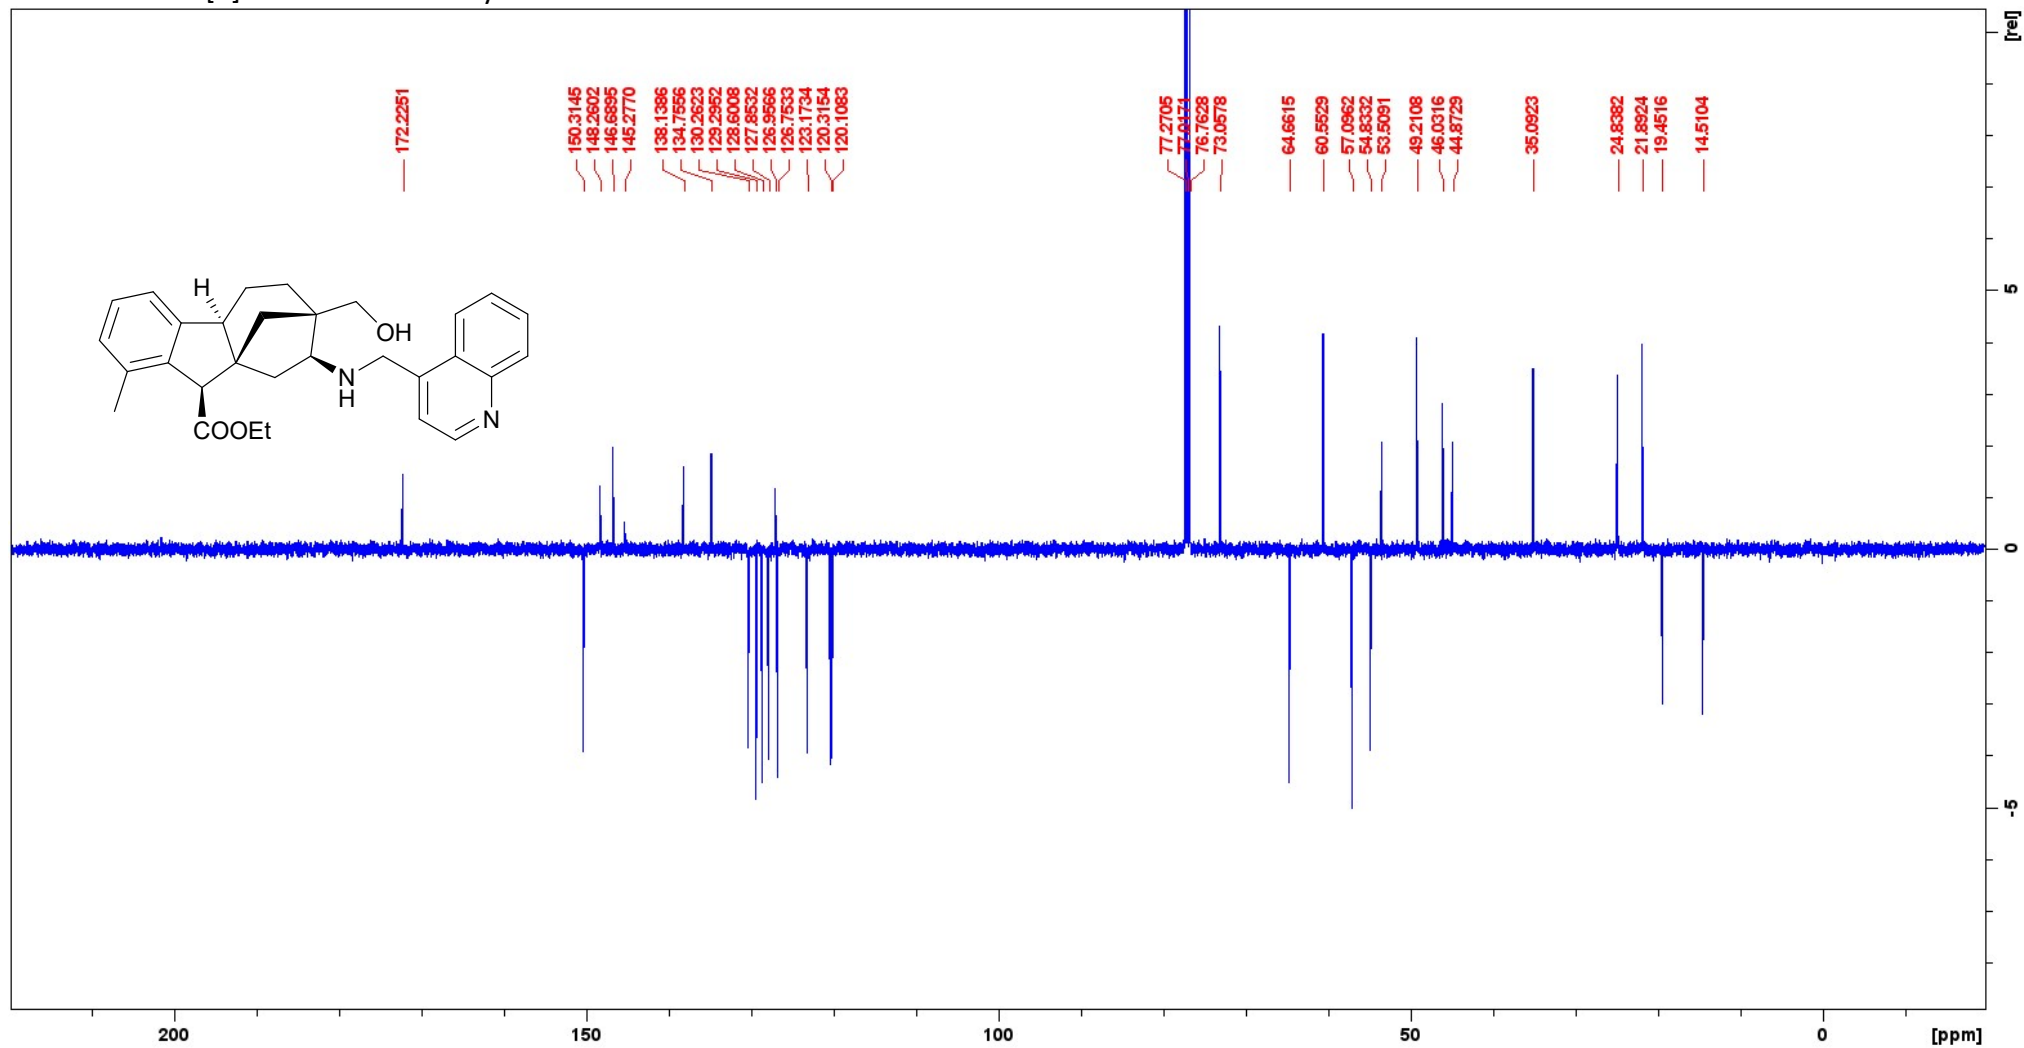

COSY of ethyl (4*bS*,7*R*,8*S*,9*aS*,10*R*)-7-(hydroxymethyl)-1-methyl-8-((quinolin-4-ylmethyl)amino)-4*b*,6,7,8,9,10-hexahydro-5*H*-7,9*a*-methanobenzo[*a*]azulene-10-carboxylate **20**

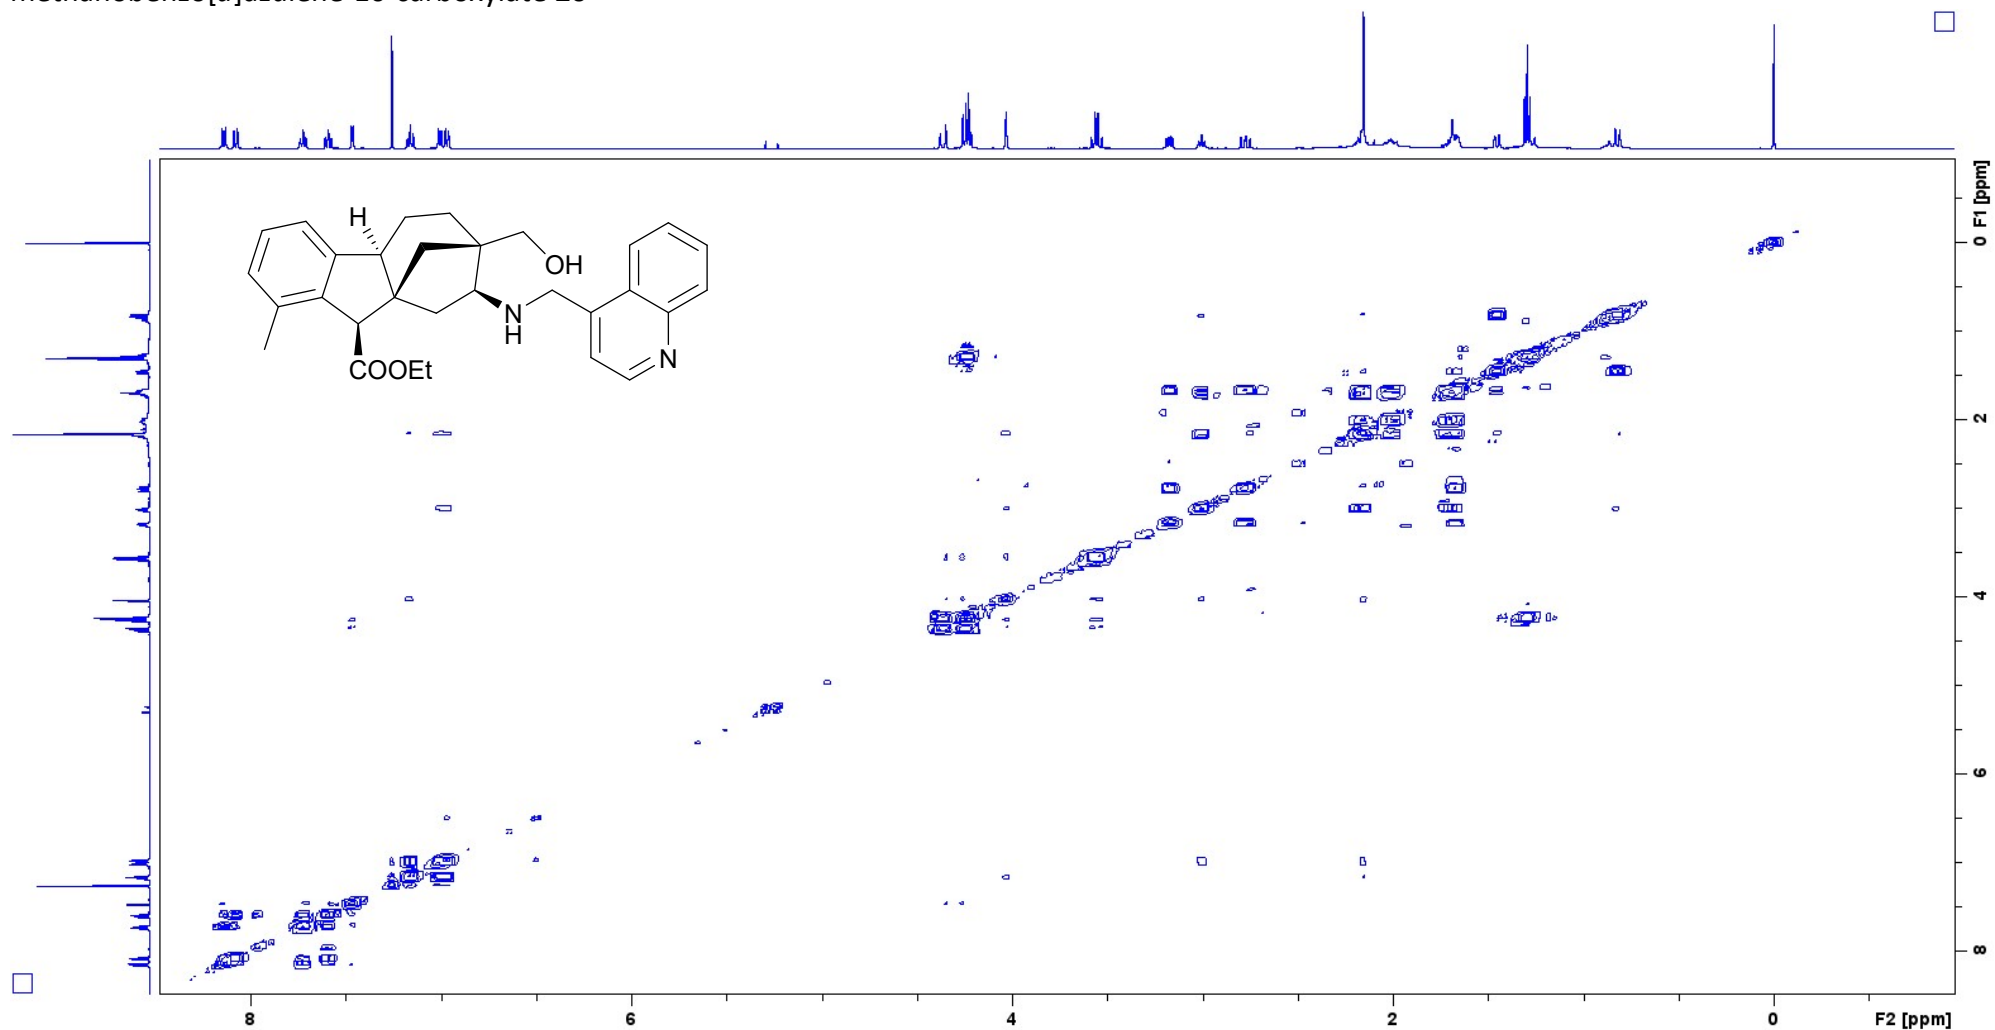

NOESY of ethyl (4*S*,7*R*,8*S*,9*aS*,10*R*)-7-(hydroxymethyl)-1-methyl-8-((quinolin-4-ylmethyl)amino)-4*b*,6,7,8,9,10-hexahydro-5*H*-7,9*a*-methanobenzo[*a*]azulene-10-carboxylate **20**

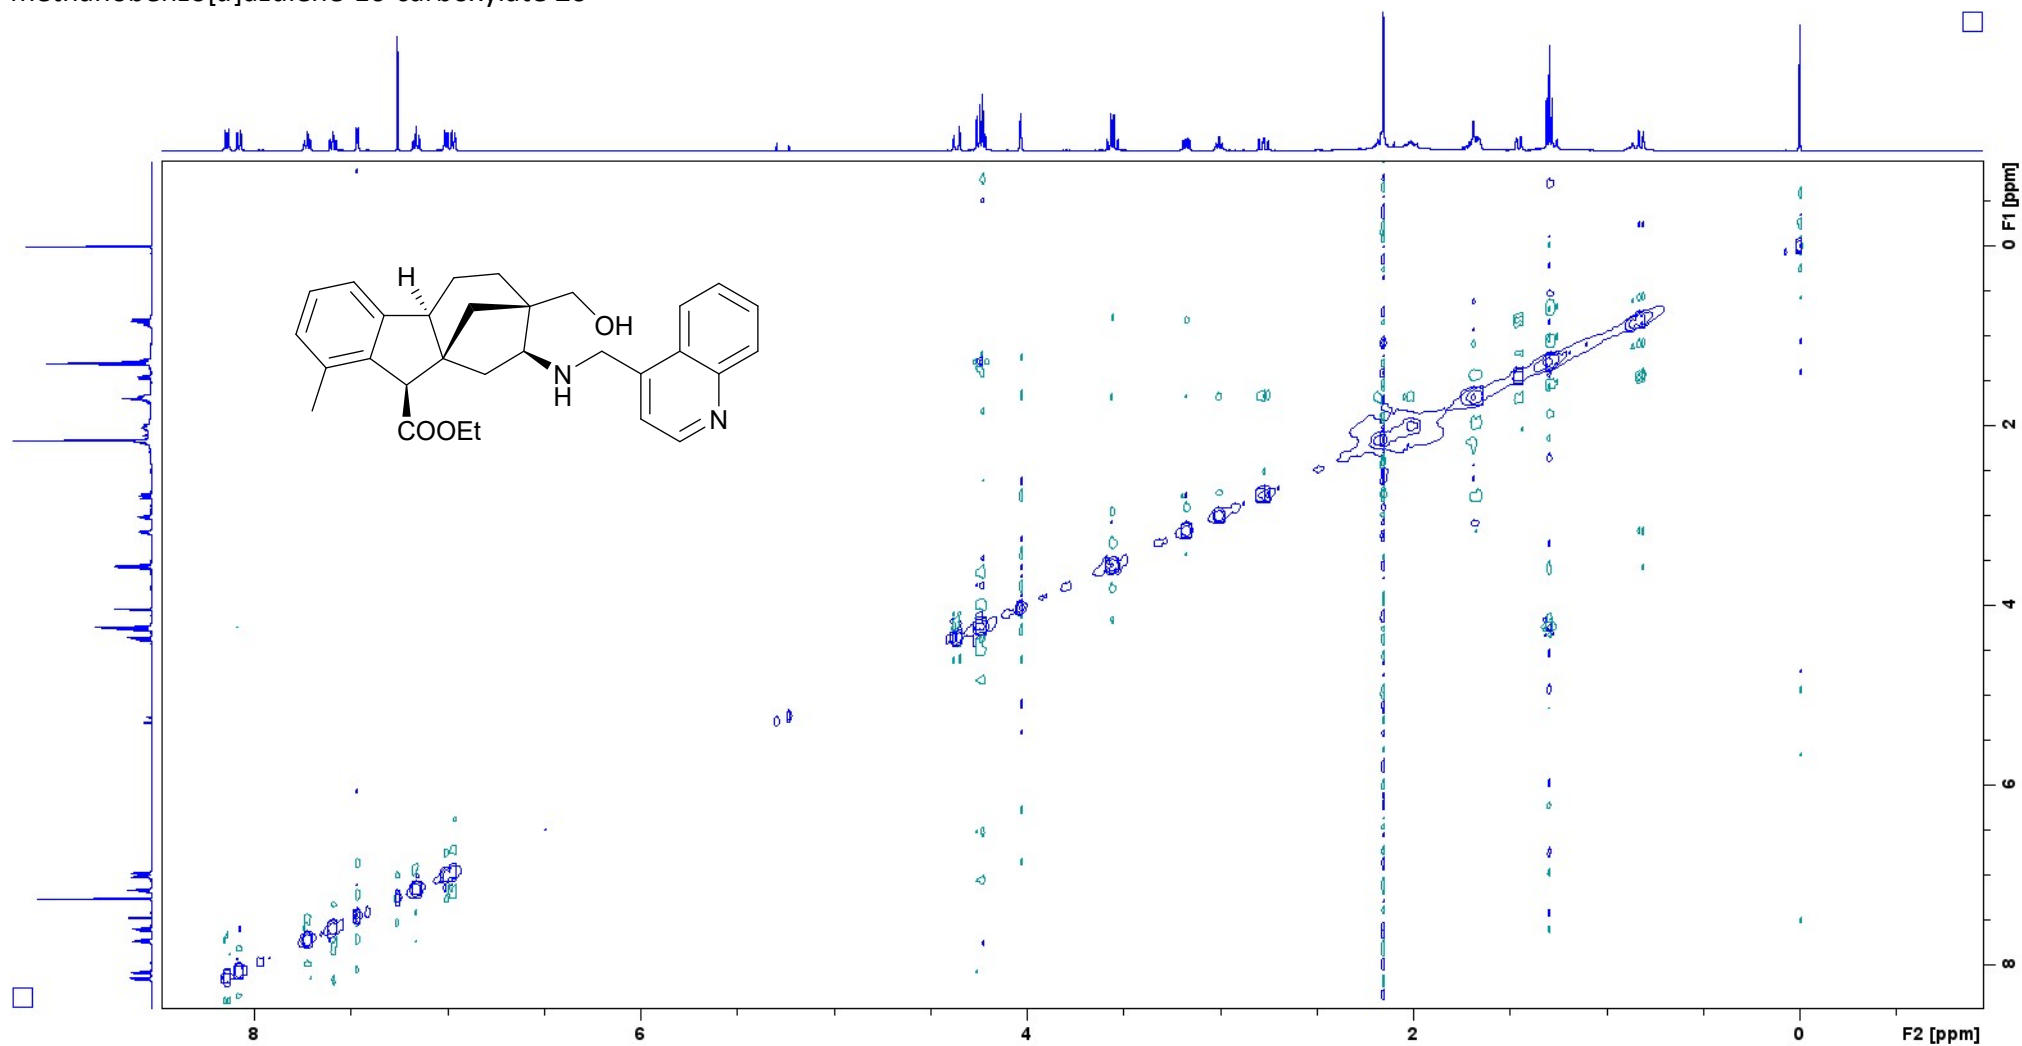

HSQC of ethyl (4*S*,7*R*,8*S*,9*aS*,10*R*)-7-(hydroxymethyl)-1-methyl-8-((quinolin-4-ylmethyl)amino)-4*b*,6,7,8,9,10-hexahydro-5*H*-7,9a-methanobenzo[*a*]azulene-10-carboxylate **20**

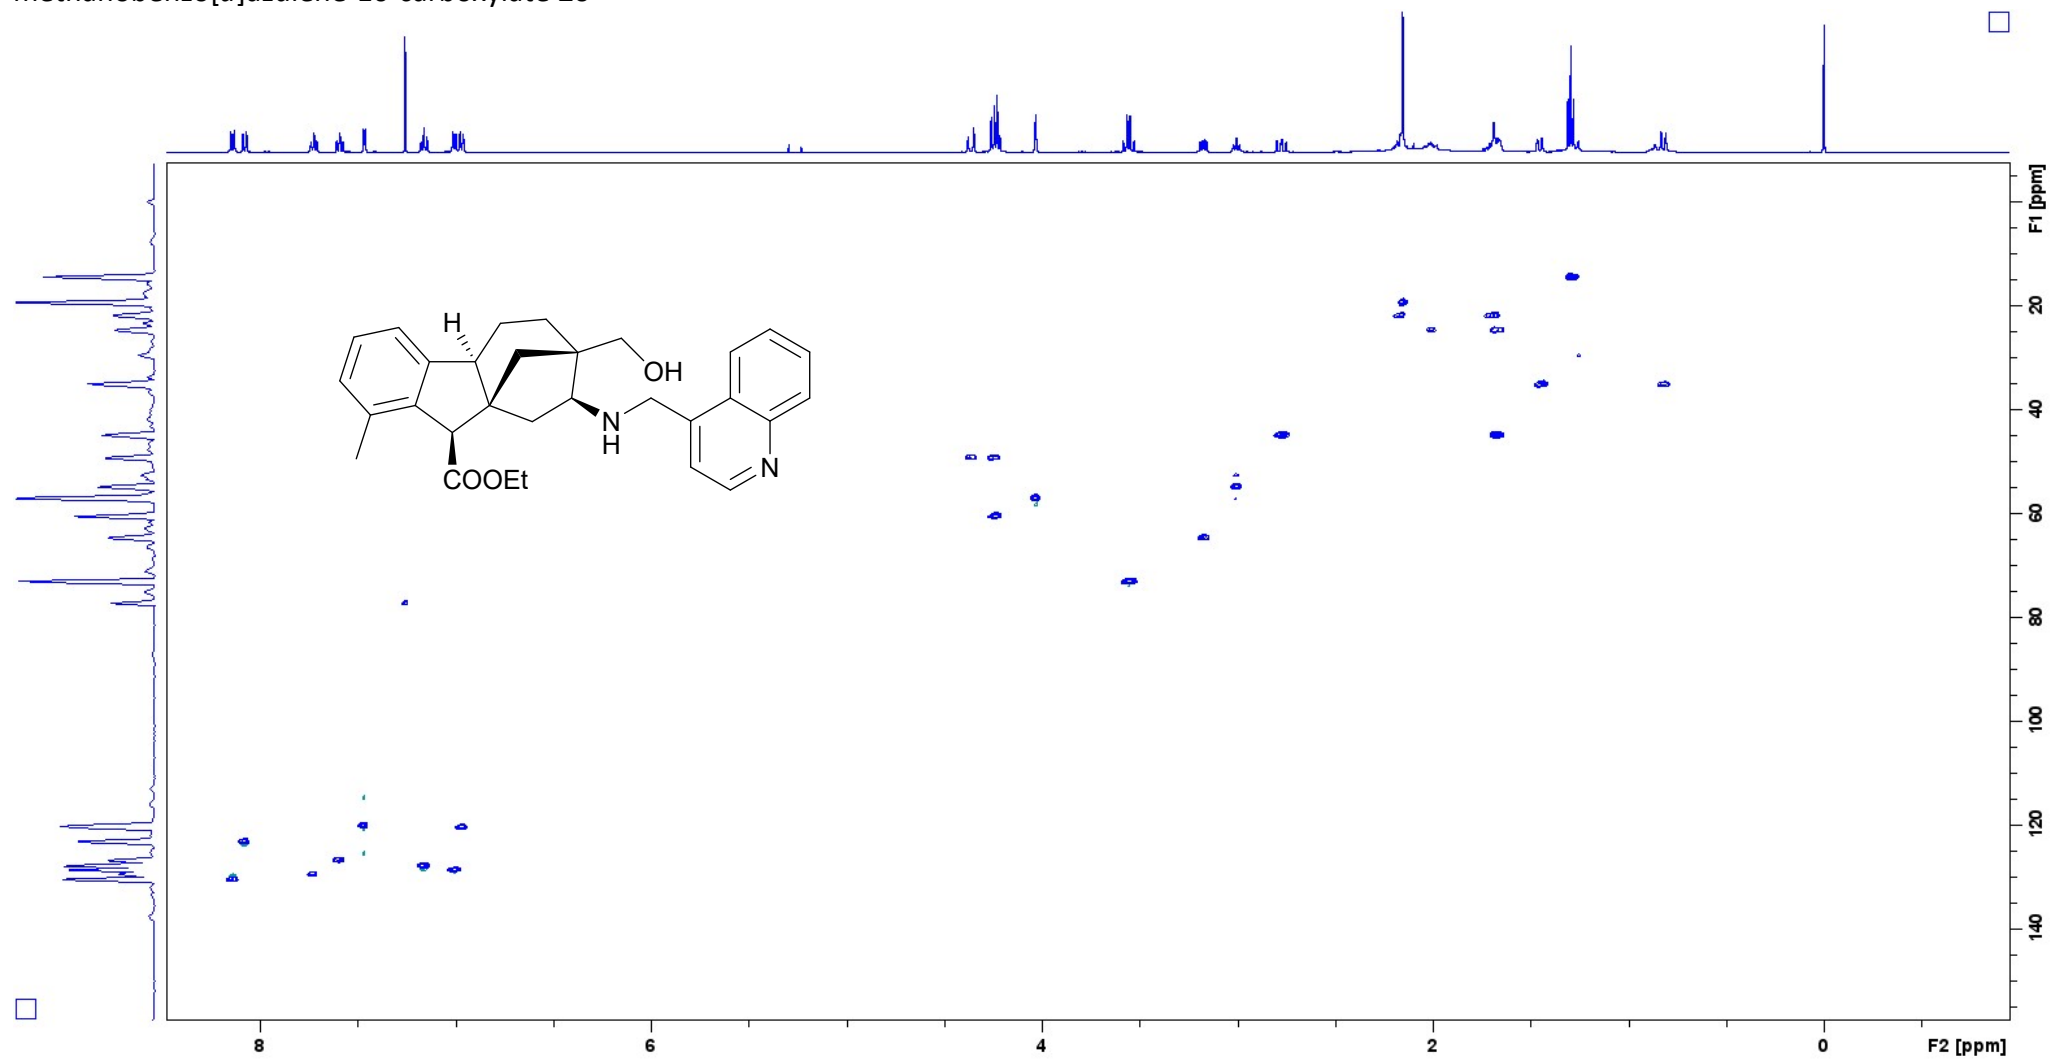

HMBC of ethyl (4*S*,7*R*,8*S*,9*aS*,10*R*)-7-(hydroxymethyl)-1-methyl-8-((quinolin-4-ylmethyl)amino)-4*b*,6,7,8,9,10-hexahydro-5*H*-7,9a-methanobenzo[*a*]azulene-10-carboxylate **20**

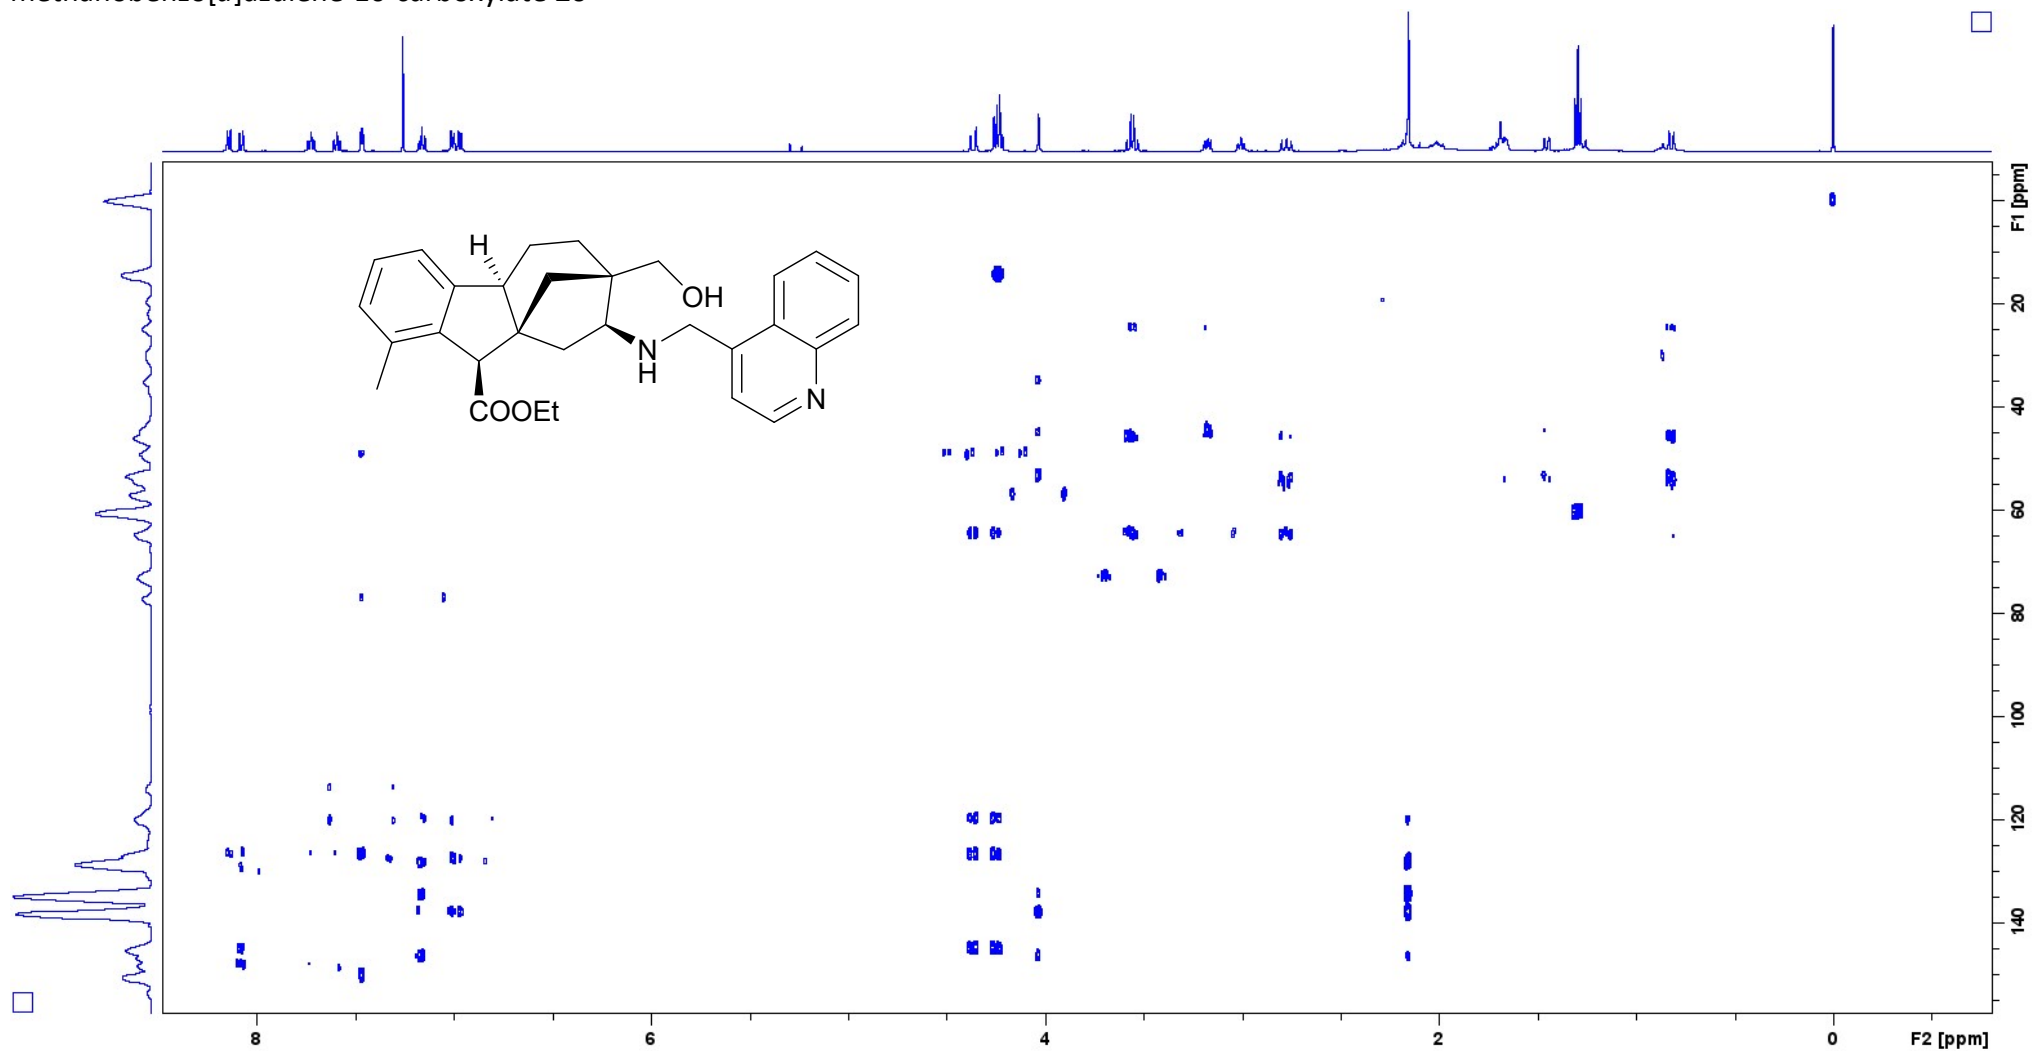

<sup>1</sup>H-NMR of ethyl (4*S*,7*R*,8*S*,9*aS*,10*R*)-7-(hydroxymethyl)-1-methyl-8-((pyridin-4-ylmethyl)amino)-4*b*,6,7,8,9,10-hexahydro-5*H*-7,9*a*-methanobenzo[*a*]azulene-10-carboxylate **21**

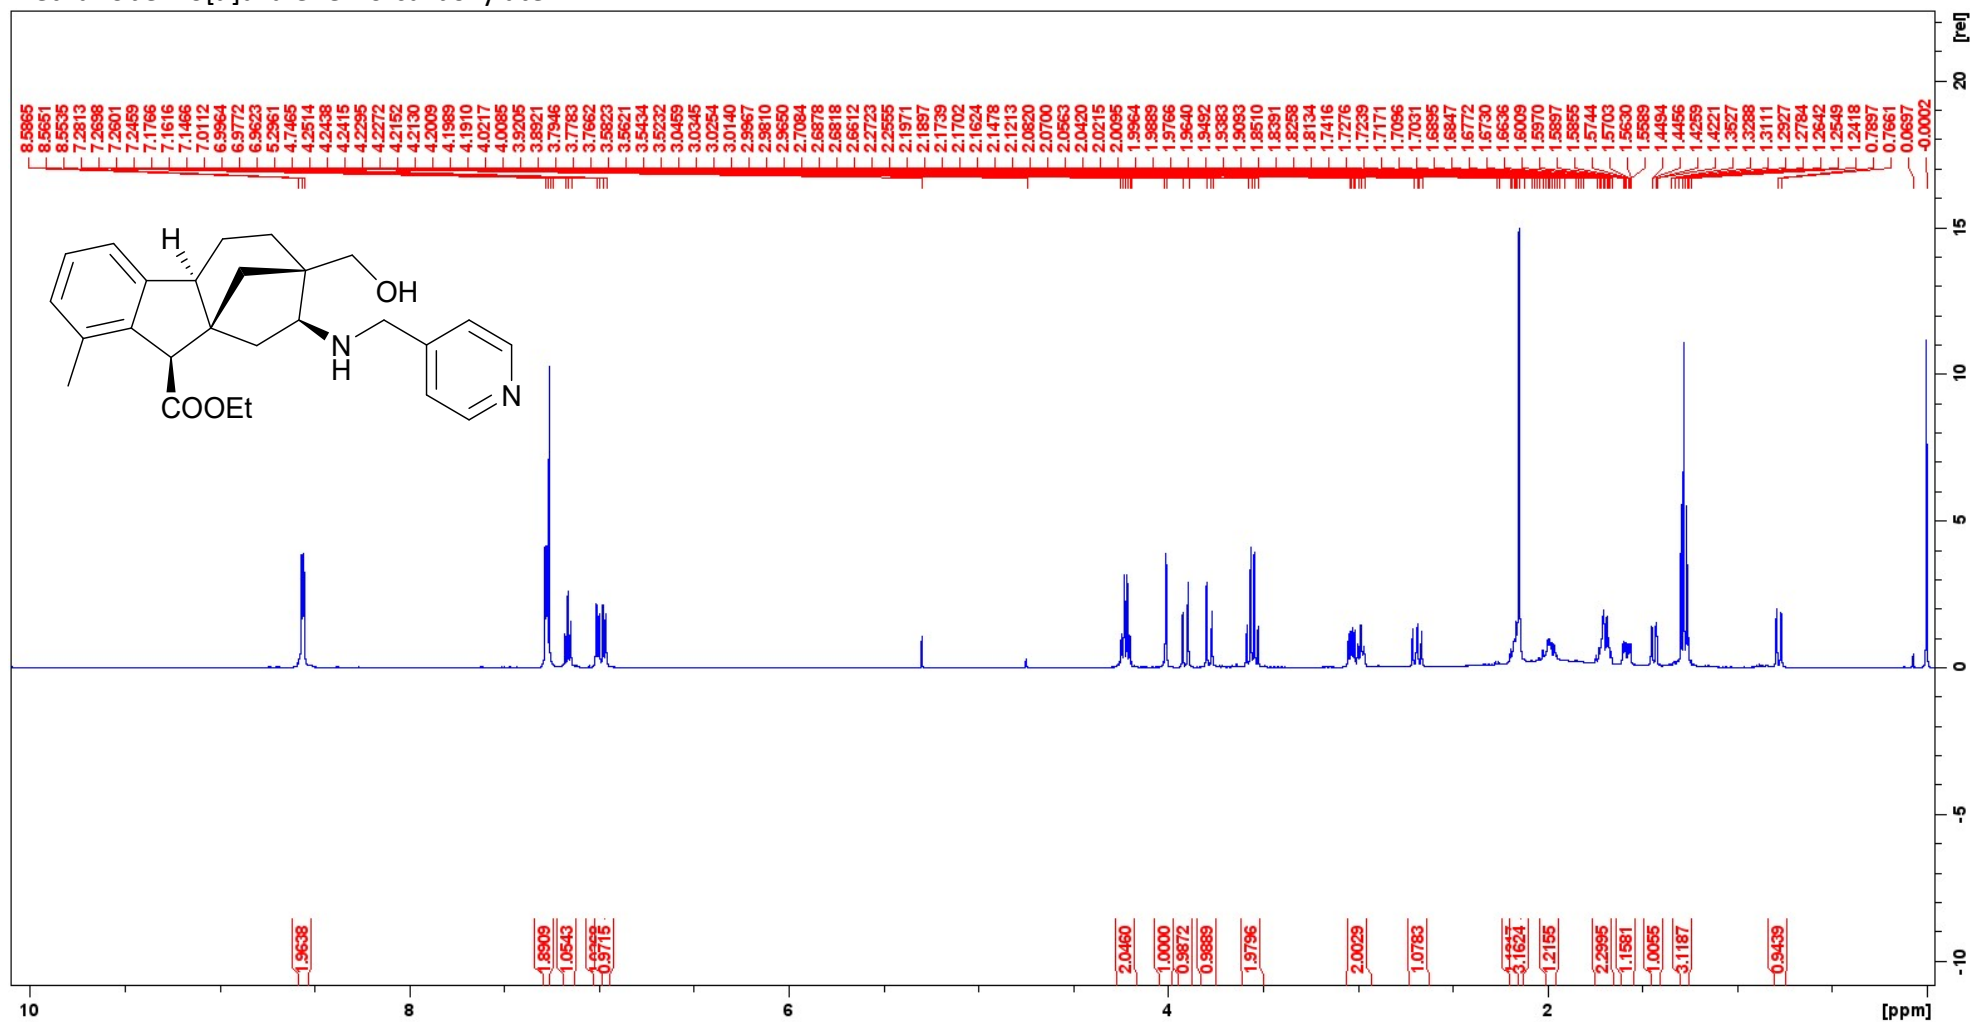

<sup>13</sup>C-NMR of ethyl (4*b**S*,7*R*,8*S*,9*a**S*,10*R*)-7-(hydroxymethyl)-1-methyl-8-((pyridin-4-ylmethyl)amino)-4*b*,6,7,8,9,10-hexahydro-5*H*-7,9*a*-methanobenzo[*a*]azulene-10-carboxylate **21**

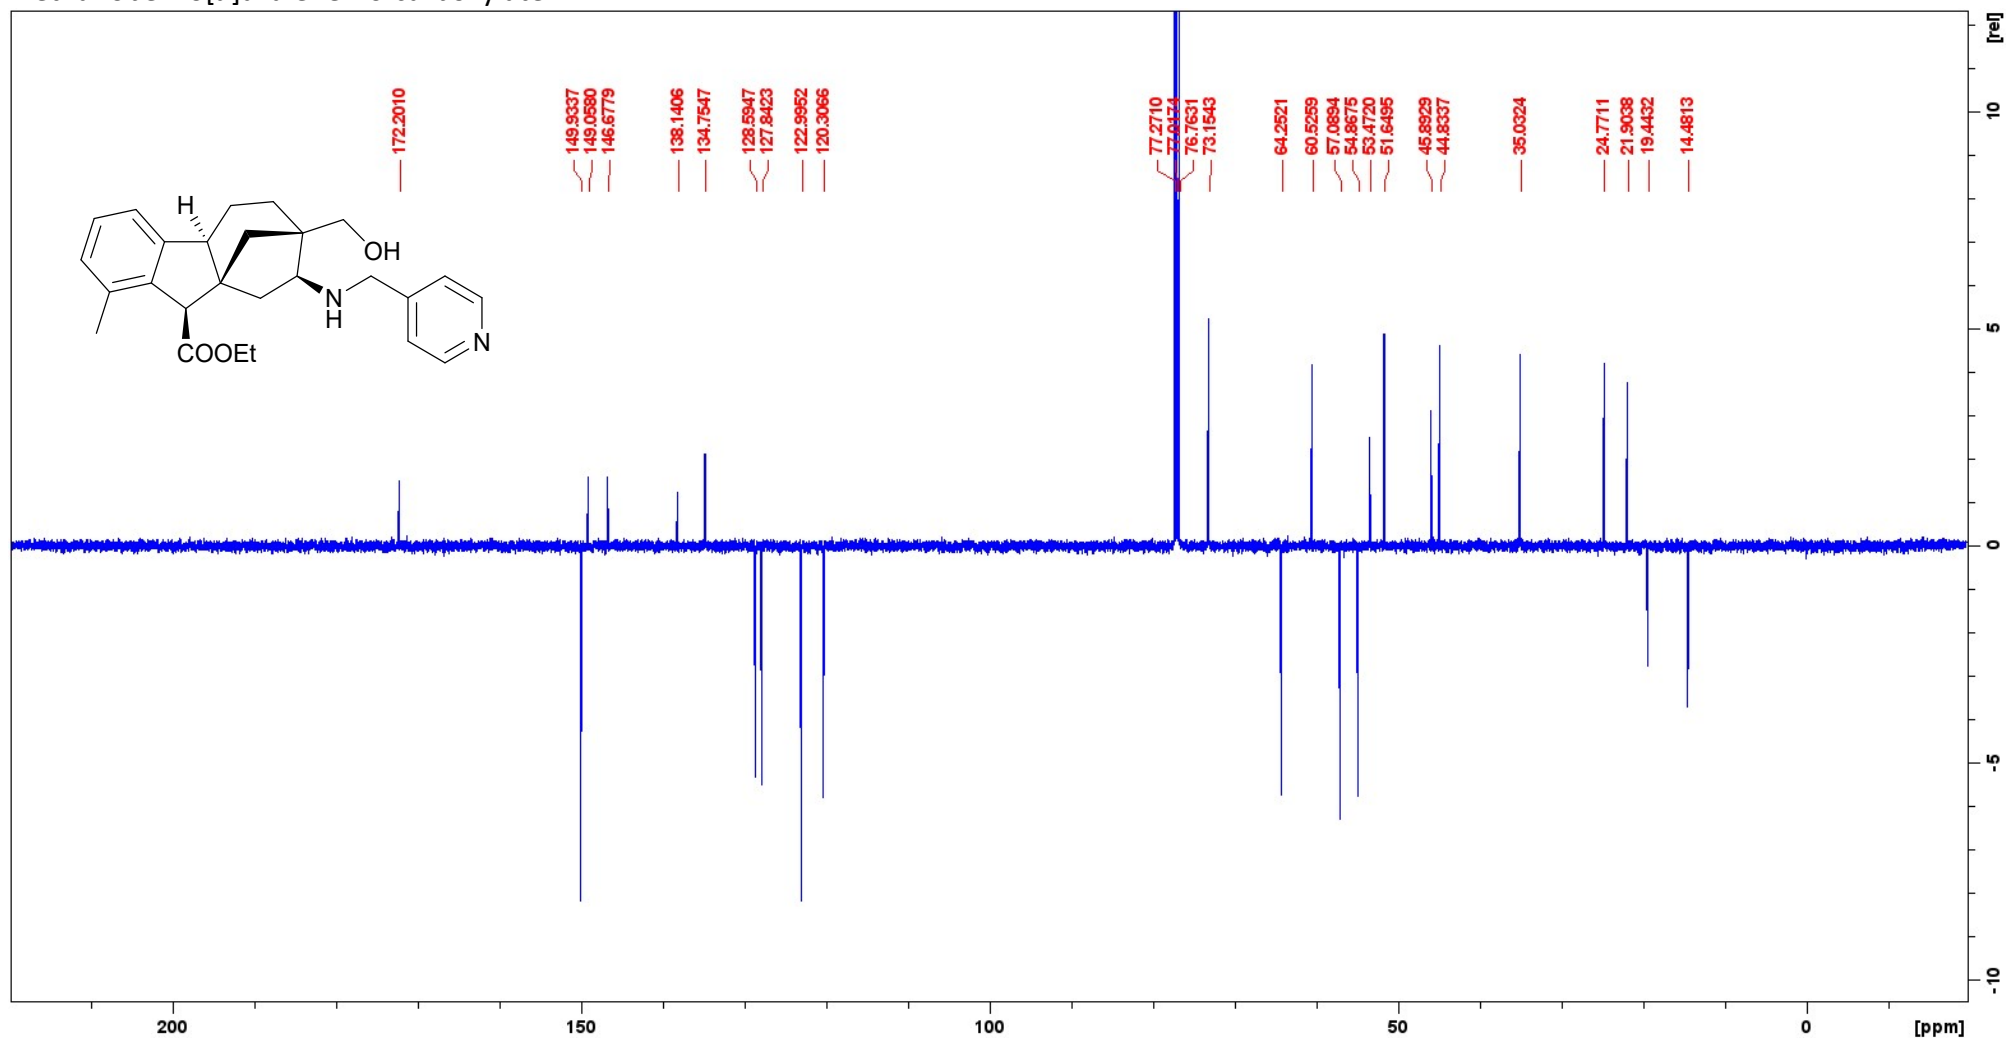



COSY of ethyl (4*b**S*,7*R*,8*S*,9*a**S*,10*R*)-7-(hydroxymethyl)-1-methyl-8-((pyridin-4-ylmethyl)amino)-4*b*,6,7,8,9,10-hexahydro-5*H*-7,9*a*-methanobenzo[*a*]azulene-10-carboxylate **21**

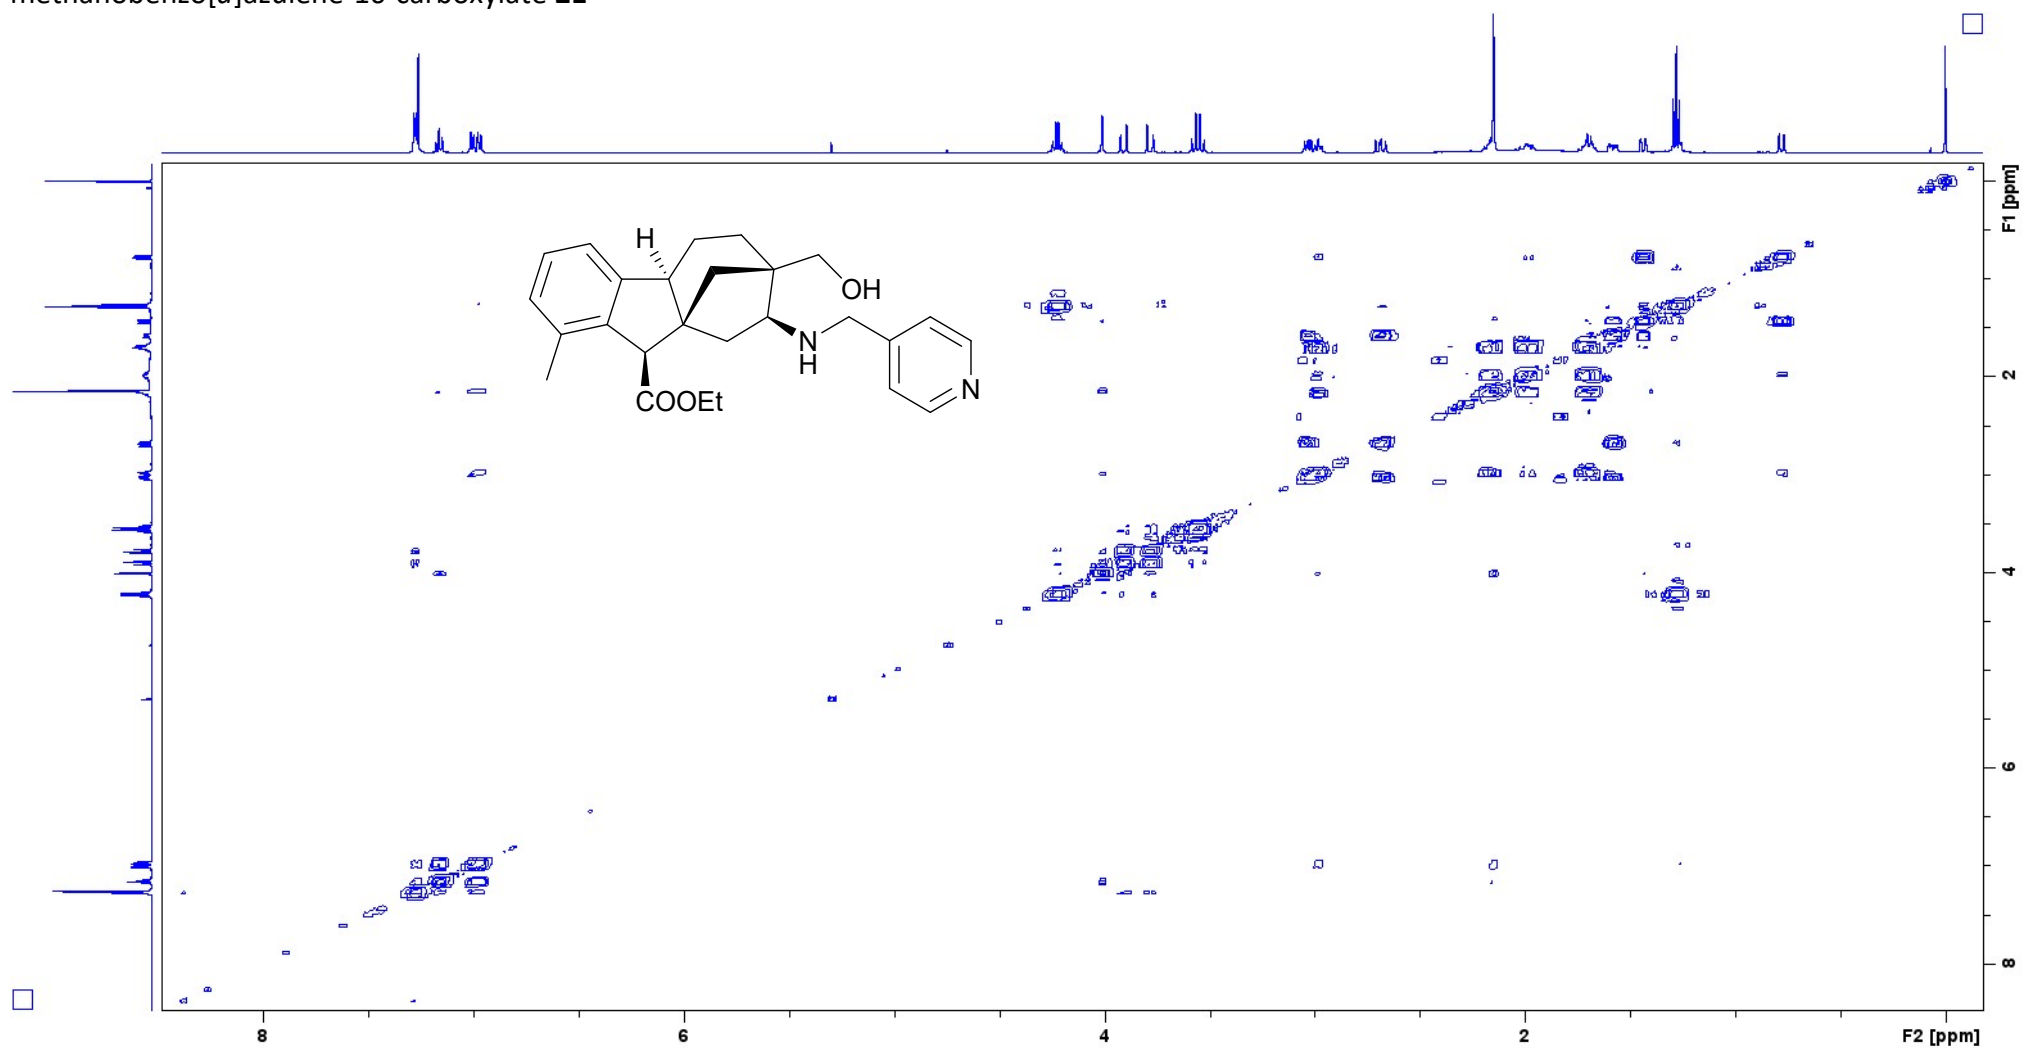

NOESY of ethyl (4*bS*,7*R*,8*S*,9*aS*,10*R*)-7-(hydroxymethyl)-1-methyl-8-((pyridin-4-ylmethyl)amino)-4*b*,6,7,8,9,10-hexahydro-5*H*-7,9*a*-methanobenzo[*a*]azulene-10-carboxylate **21**

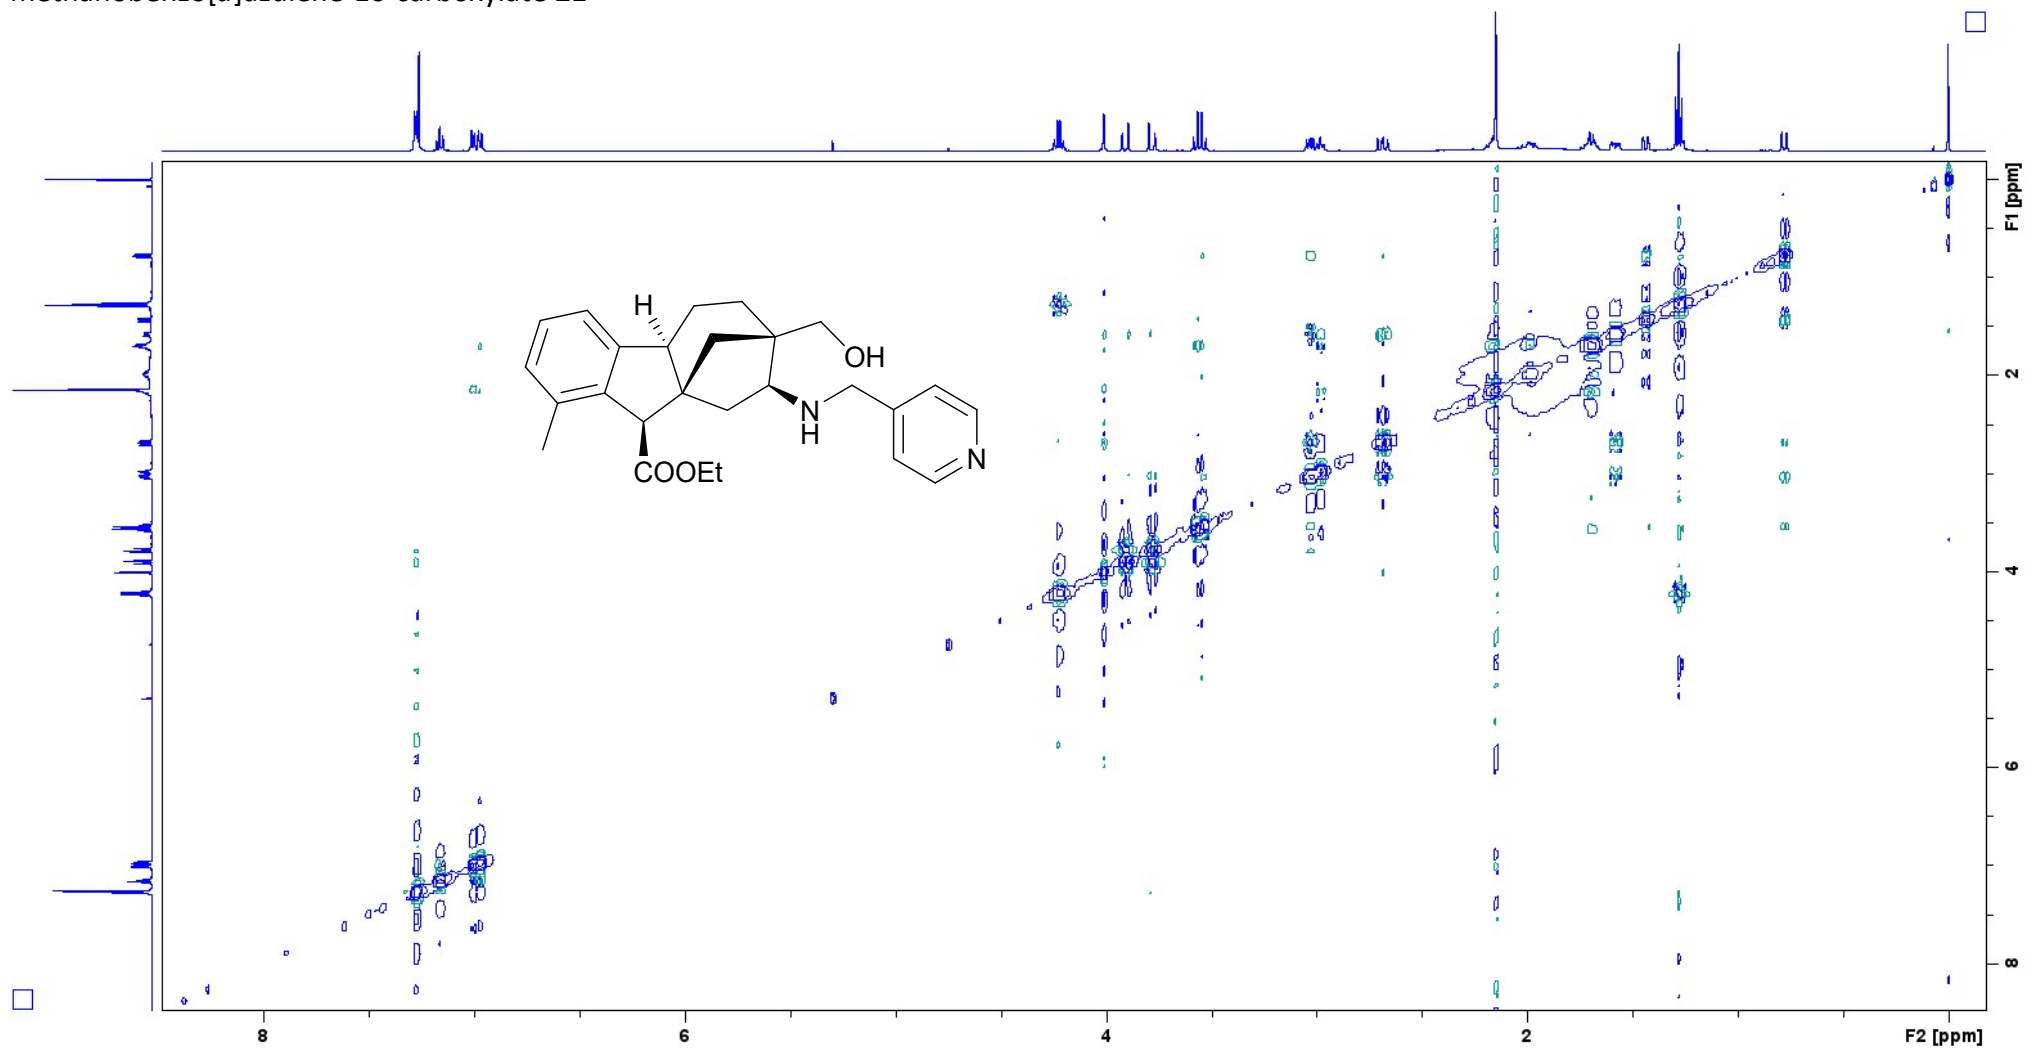

HSQC of ethyl (4*S*,7*R*,8*S*,9*aS*,10*R*)-7-(hydroxymethyl)-1-methyl-8-((pyridin-4-ylmethyl)amino)-4*b*,6,7,8,9,10-hexahydro-5*H*-7,9*a*-methanobenzo[*a*]azulene-10-carboxylate **21**

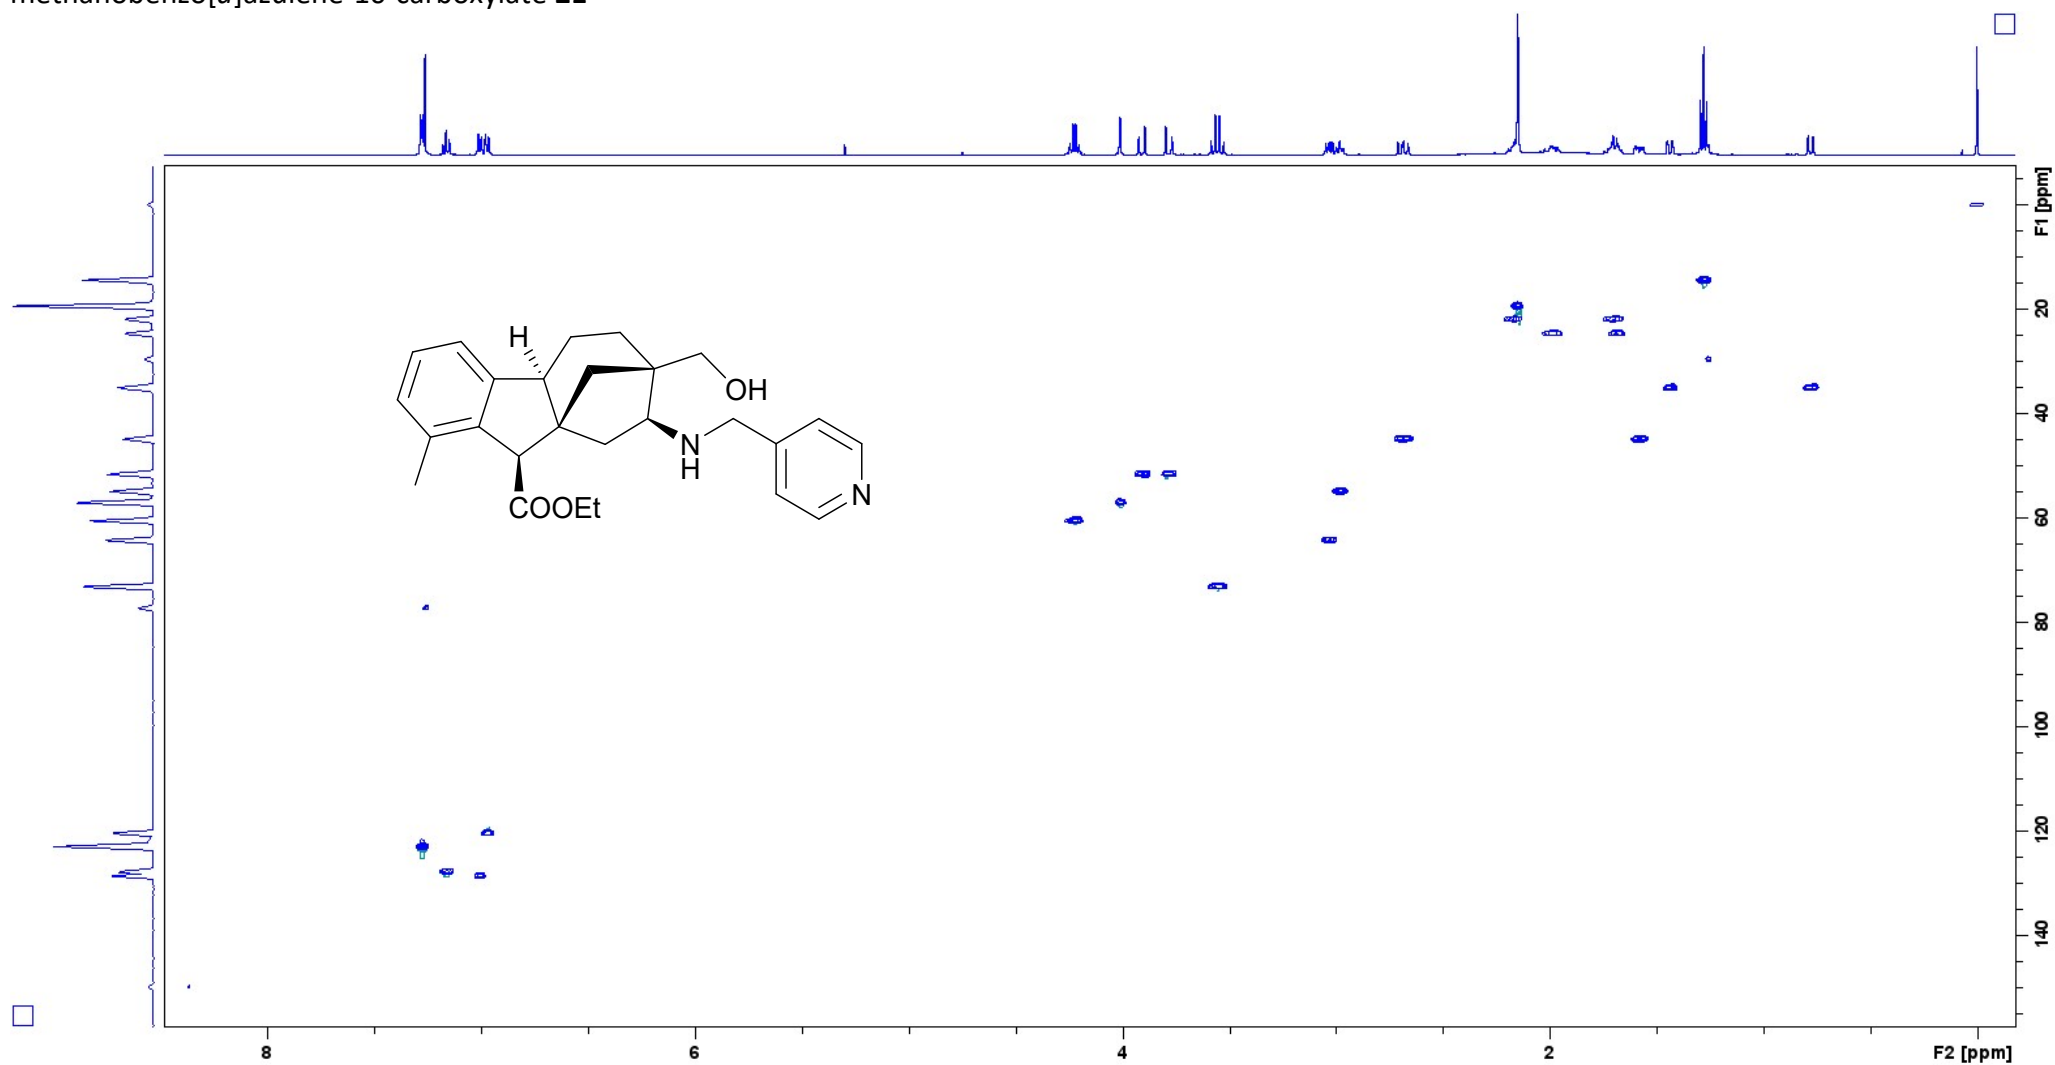

HMBC of ethyl (4*S*,7*R*,8*S*,9*aS*,10*R*)-7-(hydroxymethyl)-1-methyl-8-((pyridin-4-ylmethyl)amino)-4*b*,6,7,8,9,10-hexahydro-5*H*-7,9*a*-methanobenzo[*a*]azulene-10-carboxylate **21**

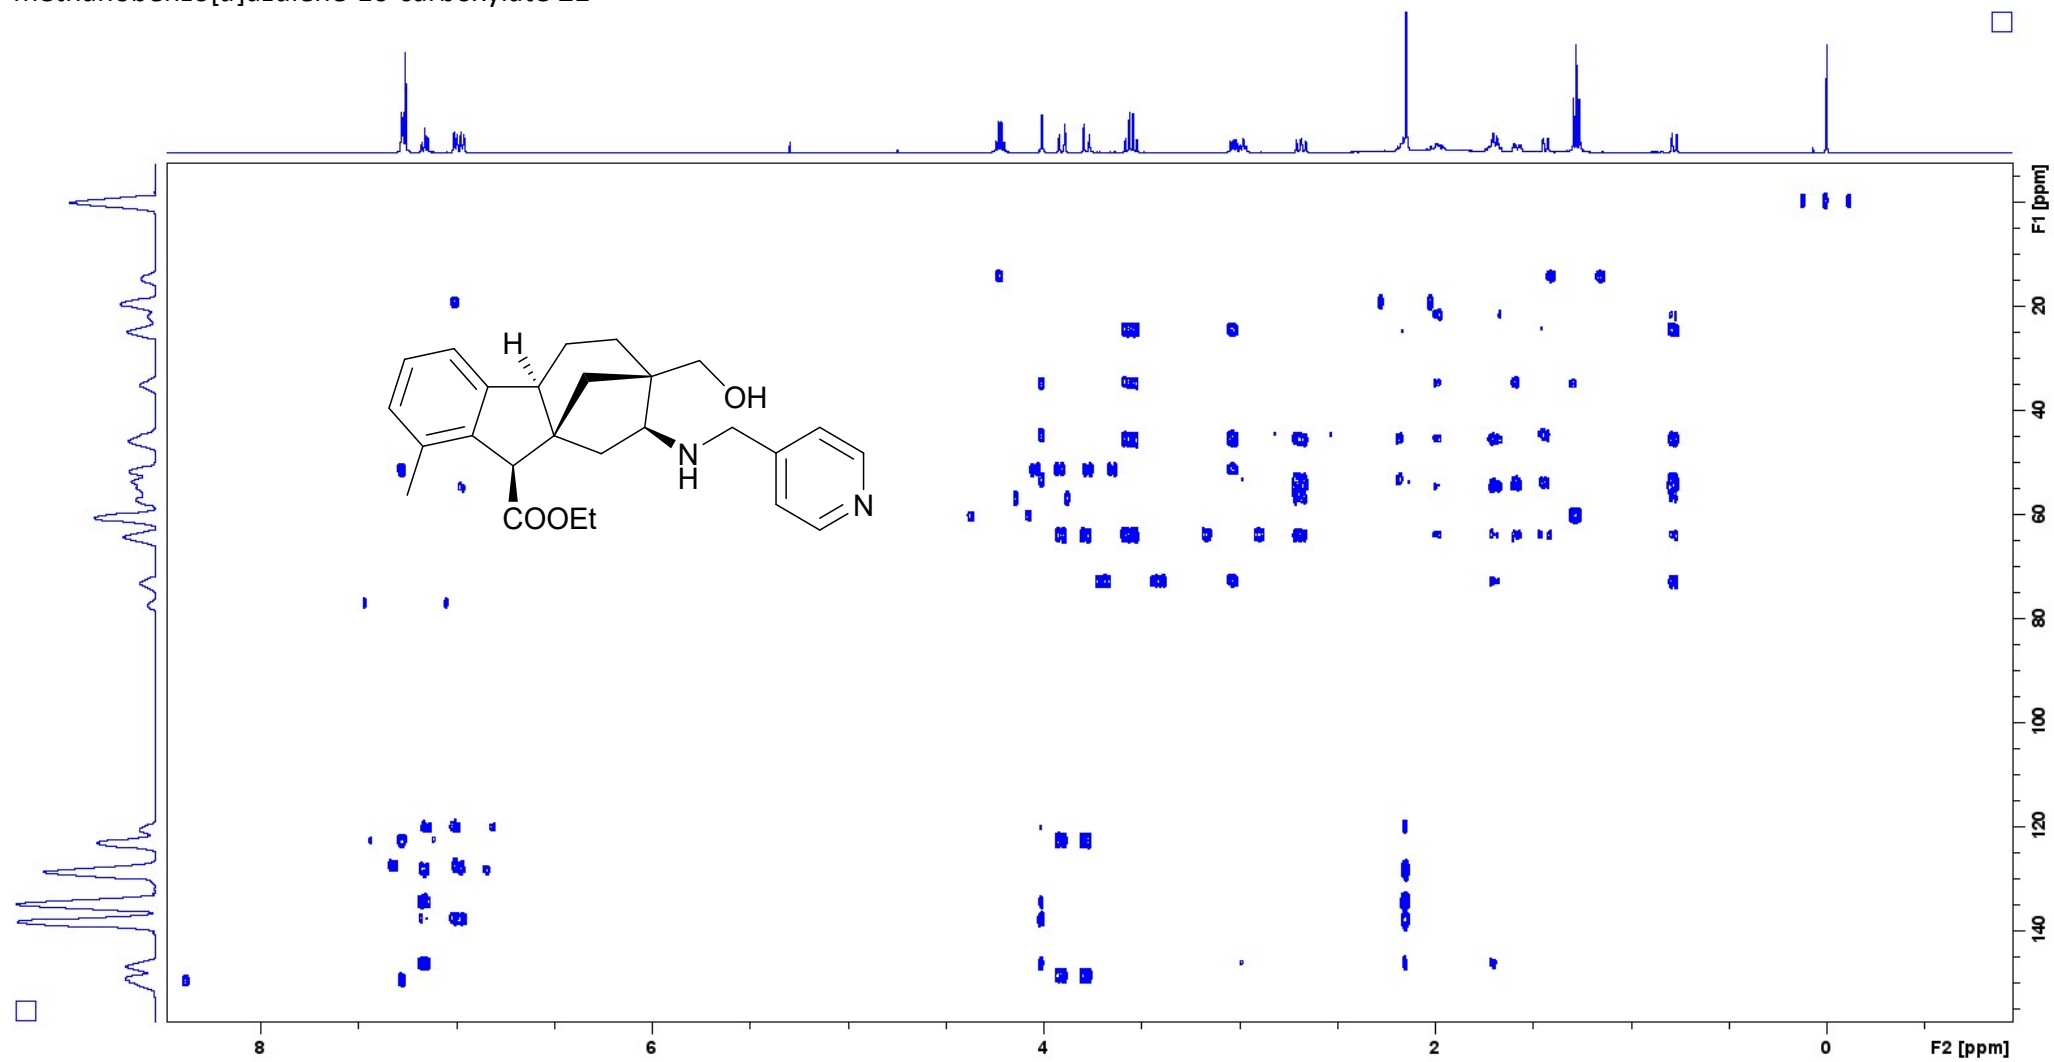

<sup>1</sup>H-NMR of ethyl (4*b*S,7*S*,8*R*,9*a*S,10*R*)-7-((benzylamino)methyl)-8-hydroxy-1-methyl-4*b*,6,7,8,9,10-hexahydro-5*H*-7,9*a*-methanobenzo[*a*]azulene-10-carboxylate **30**

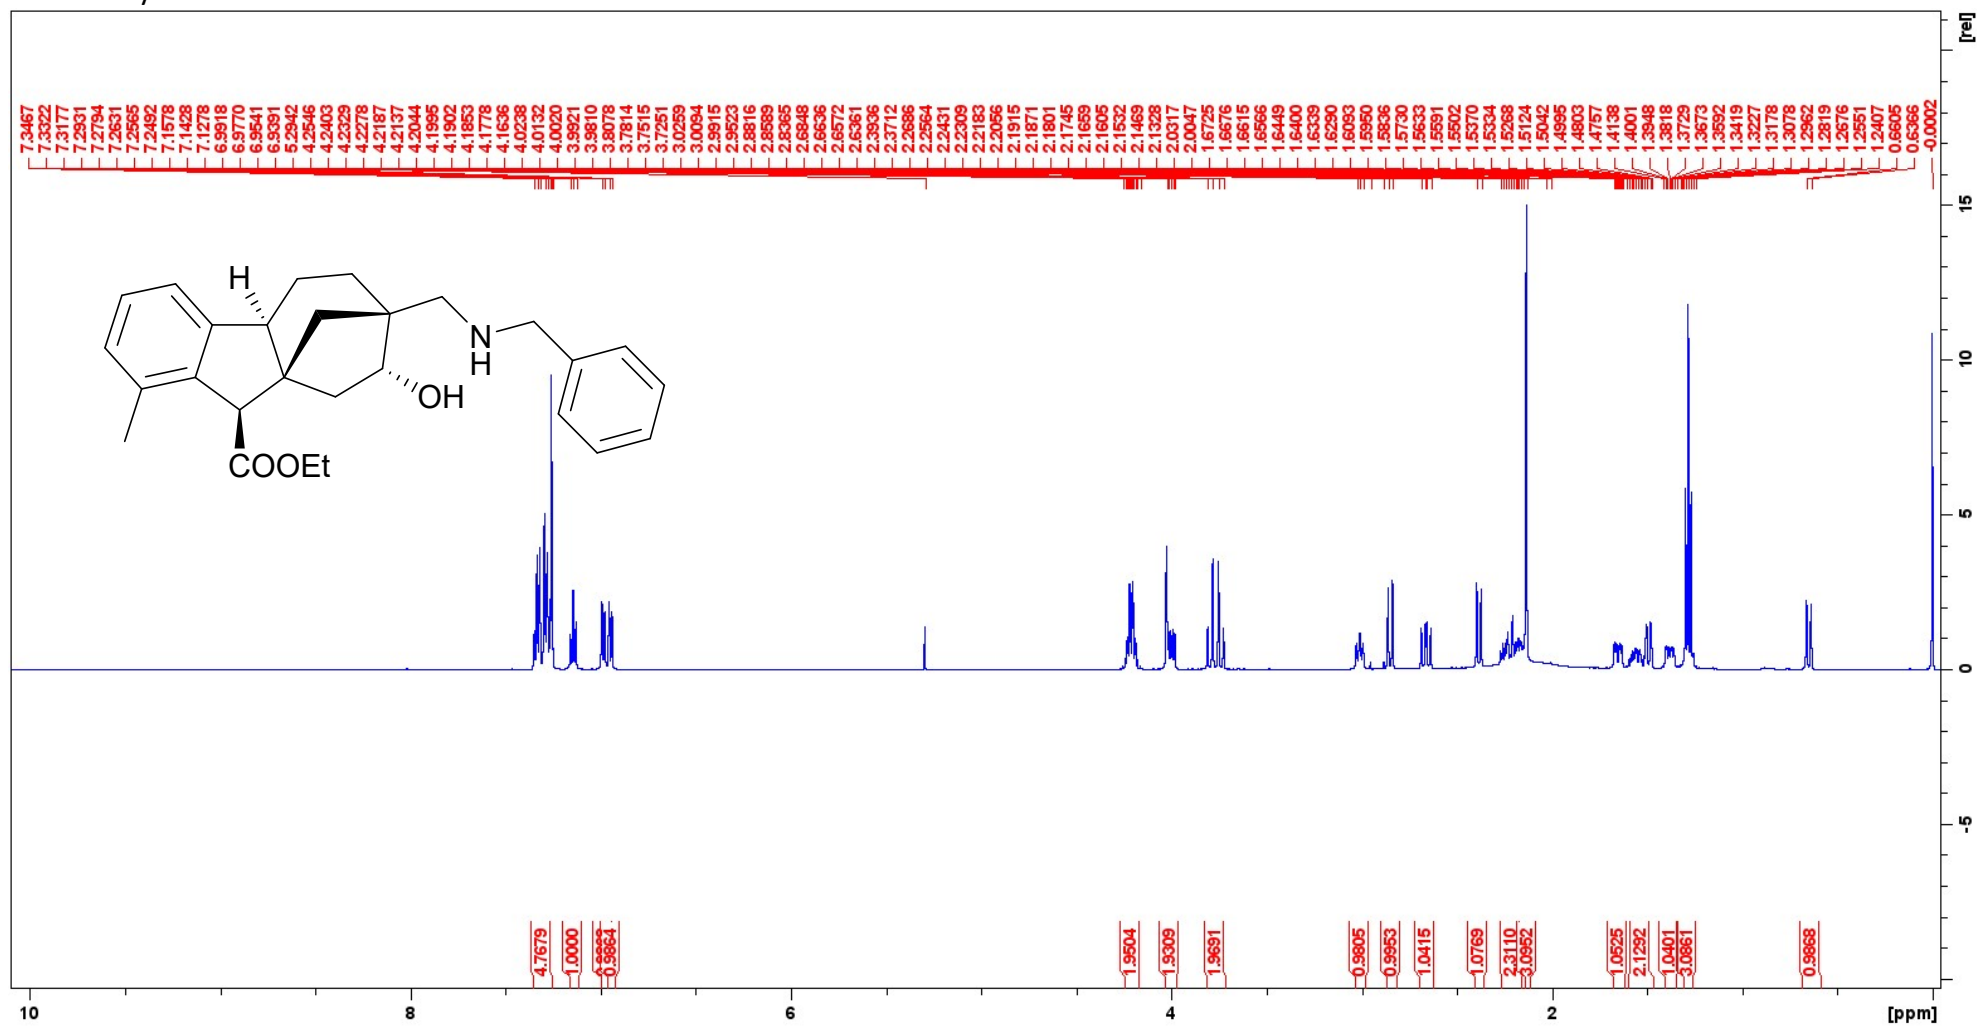

<sup>13</sup>C-NMR of ethyl (4*b*S,7*S*,8*R*,9*a*S,10*R*)-7-((benzylamino)methyl)-8-hydroxy-1-methyl-4*b*,6,7,8,9,10-hexahydro-5*H*-7,9*a*-methanobenzo[*a*]azulene-10-carboxylate **30**

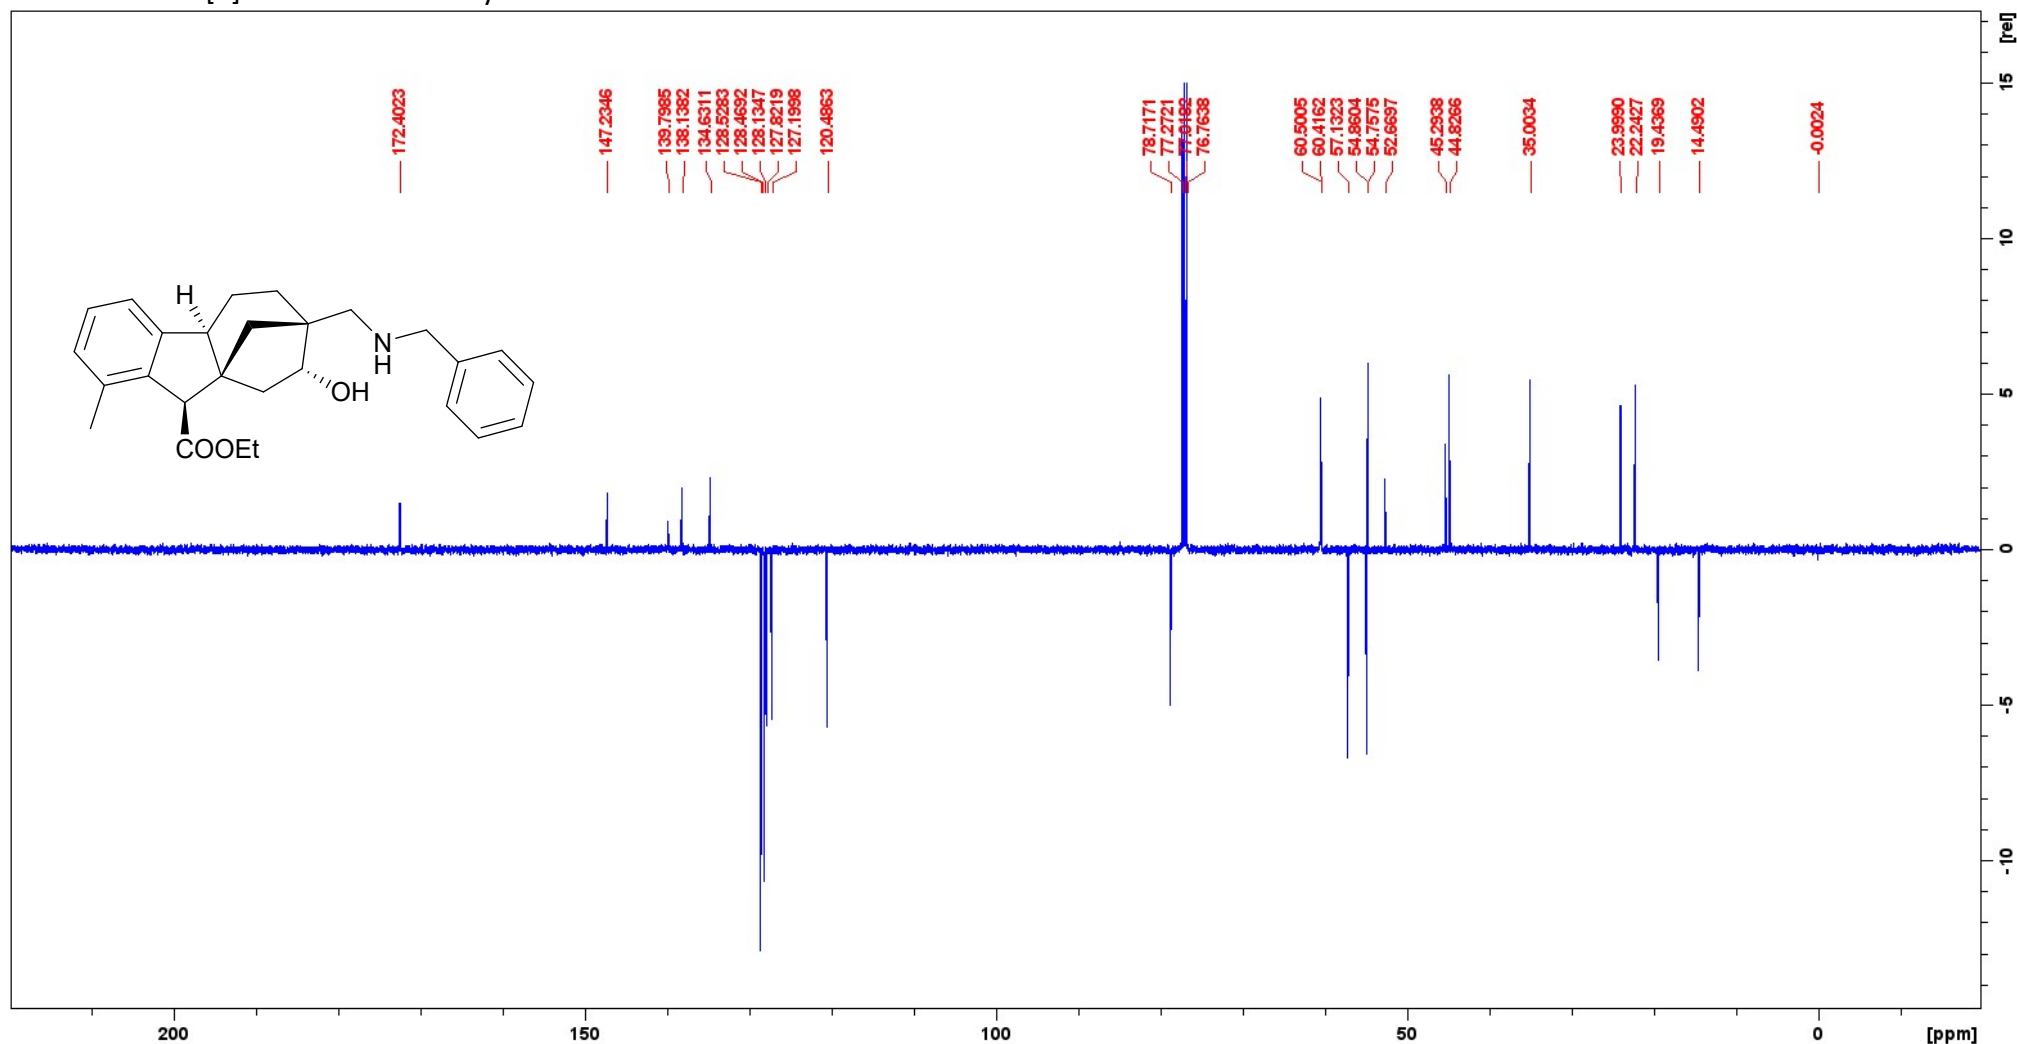

HSQC of ethyl (4*b**S*,7*S*,8*R*,9*a**S*,10*R*)-7-((benzylamino)methyl)-8-hydroxy-1-methyl-4*b*,6,7,8,9,10-hexahydro-5*H*-7,9*a*-methanobenzo[*a*]azulene-10-carboxylate **30**

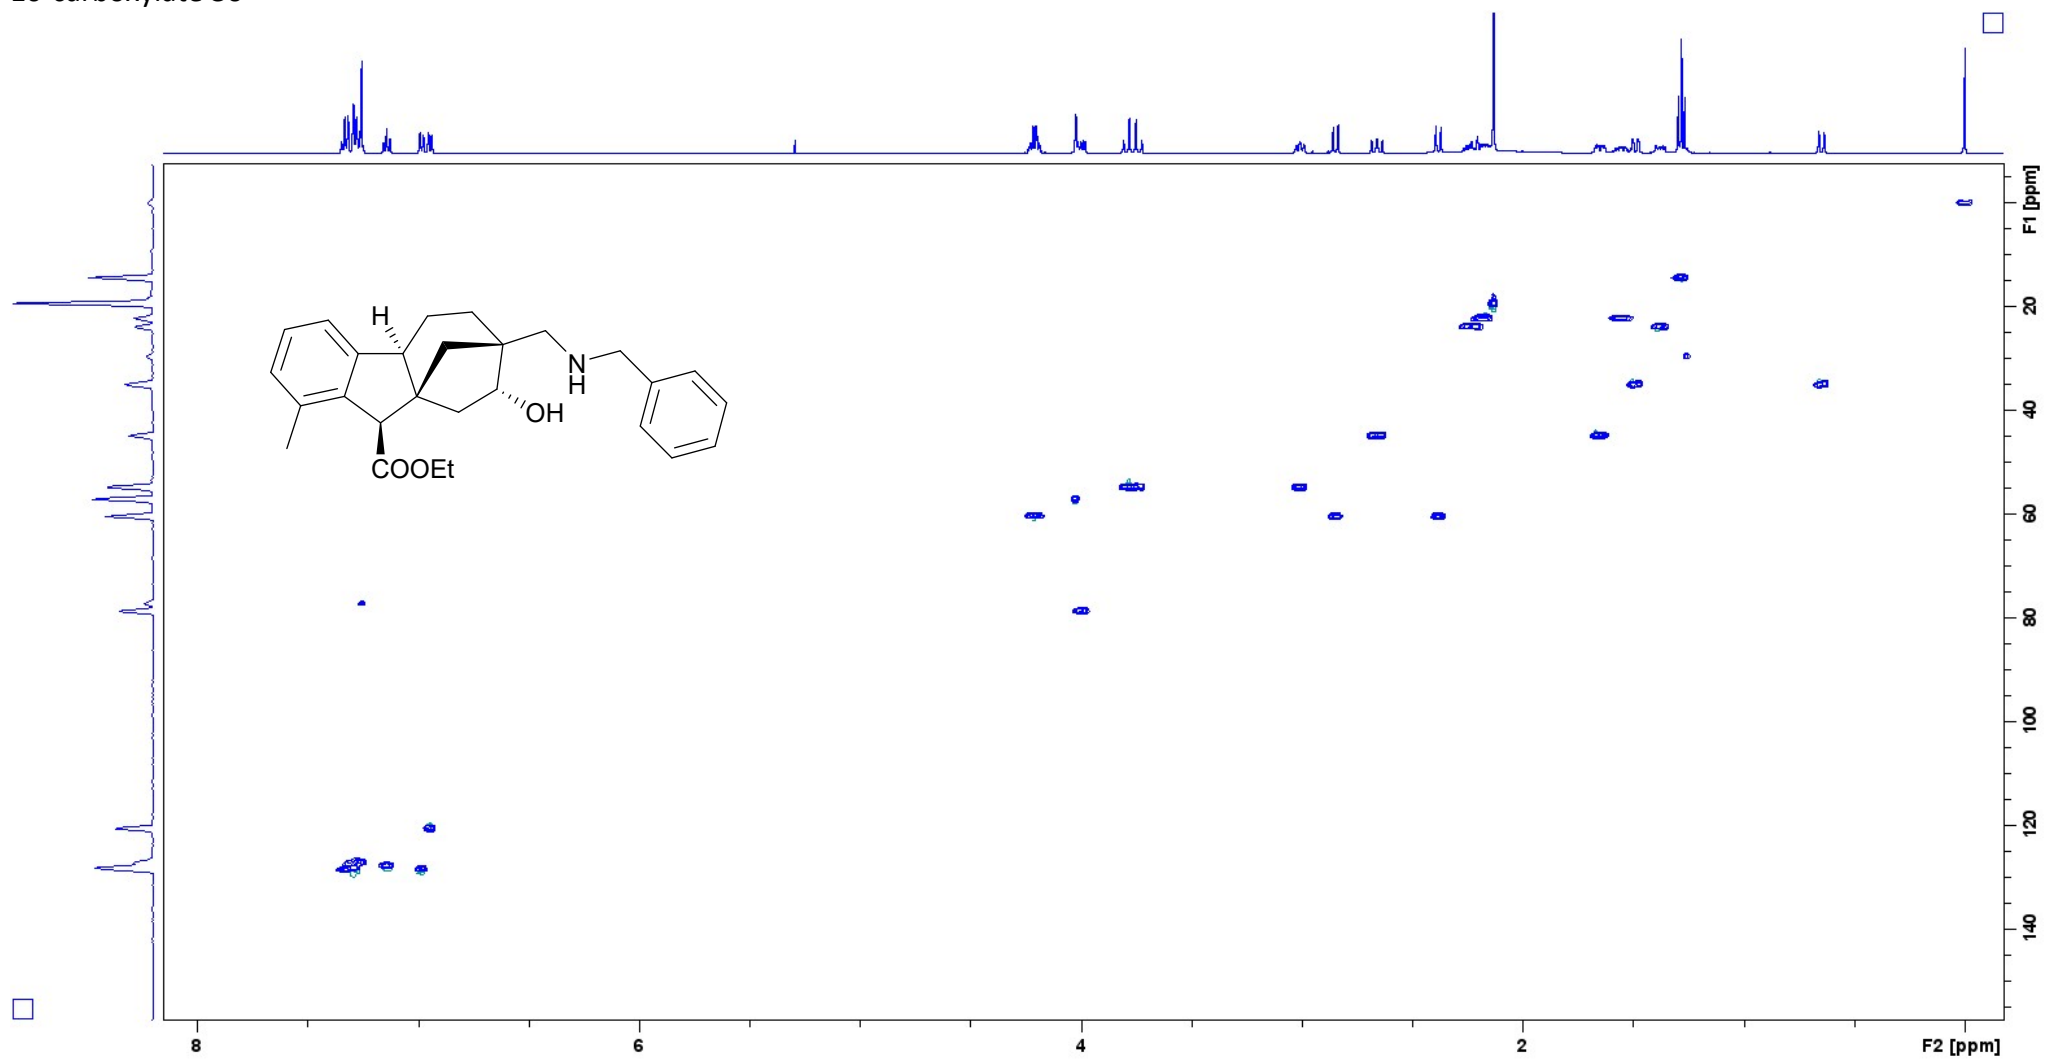

$^1\text{H-NMR}$  of ethyl (4*b*S,7*S*,8*R*,9*a*S,10*R*)-8-hydroxy-1-methyl-7-(((naphthalen-1-ylmethyl)amino)methyl)-4*b*,6,7,8,9,10-hexahydro-5*H*-7,9*a*-methanobenzo[*a*]azulene-10-carboxylate **31**

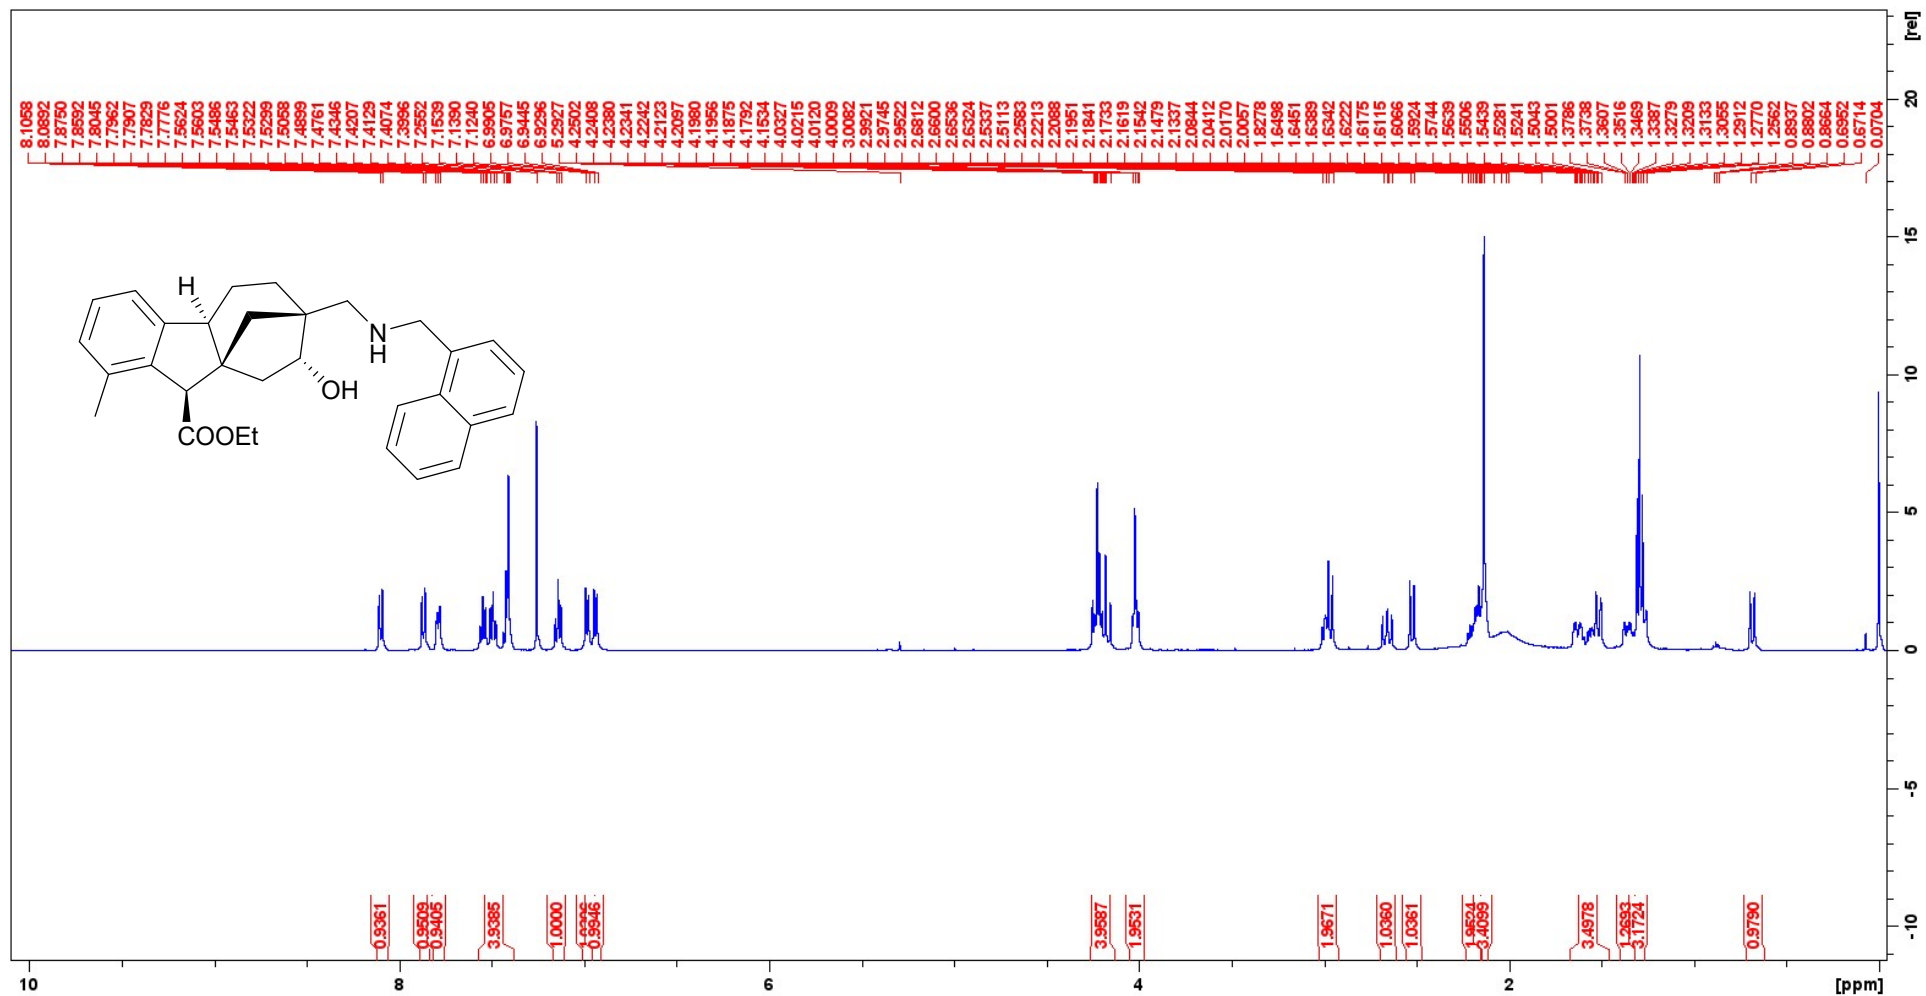



$^{13}\text{C}$ -NMR of ethyl (4*S*,7*S*,8*R*,9*aS*,10*R*)-8-hydroxy-1-methyl-7-(((naphthalen-1-ylmethyl)amino)methyl)-4*b*,6,7,8,9,10-hexahydro-5*H*-7,9a-methanobenzo[*a*]azulene-10-carboxylate **31**

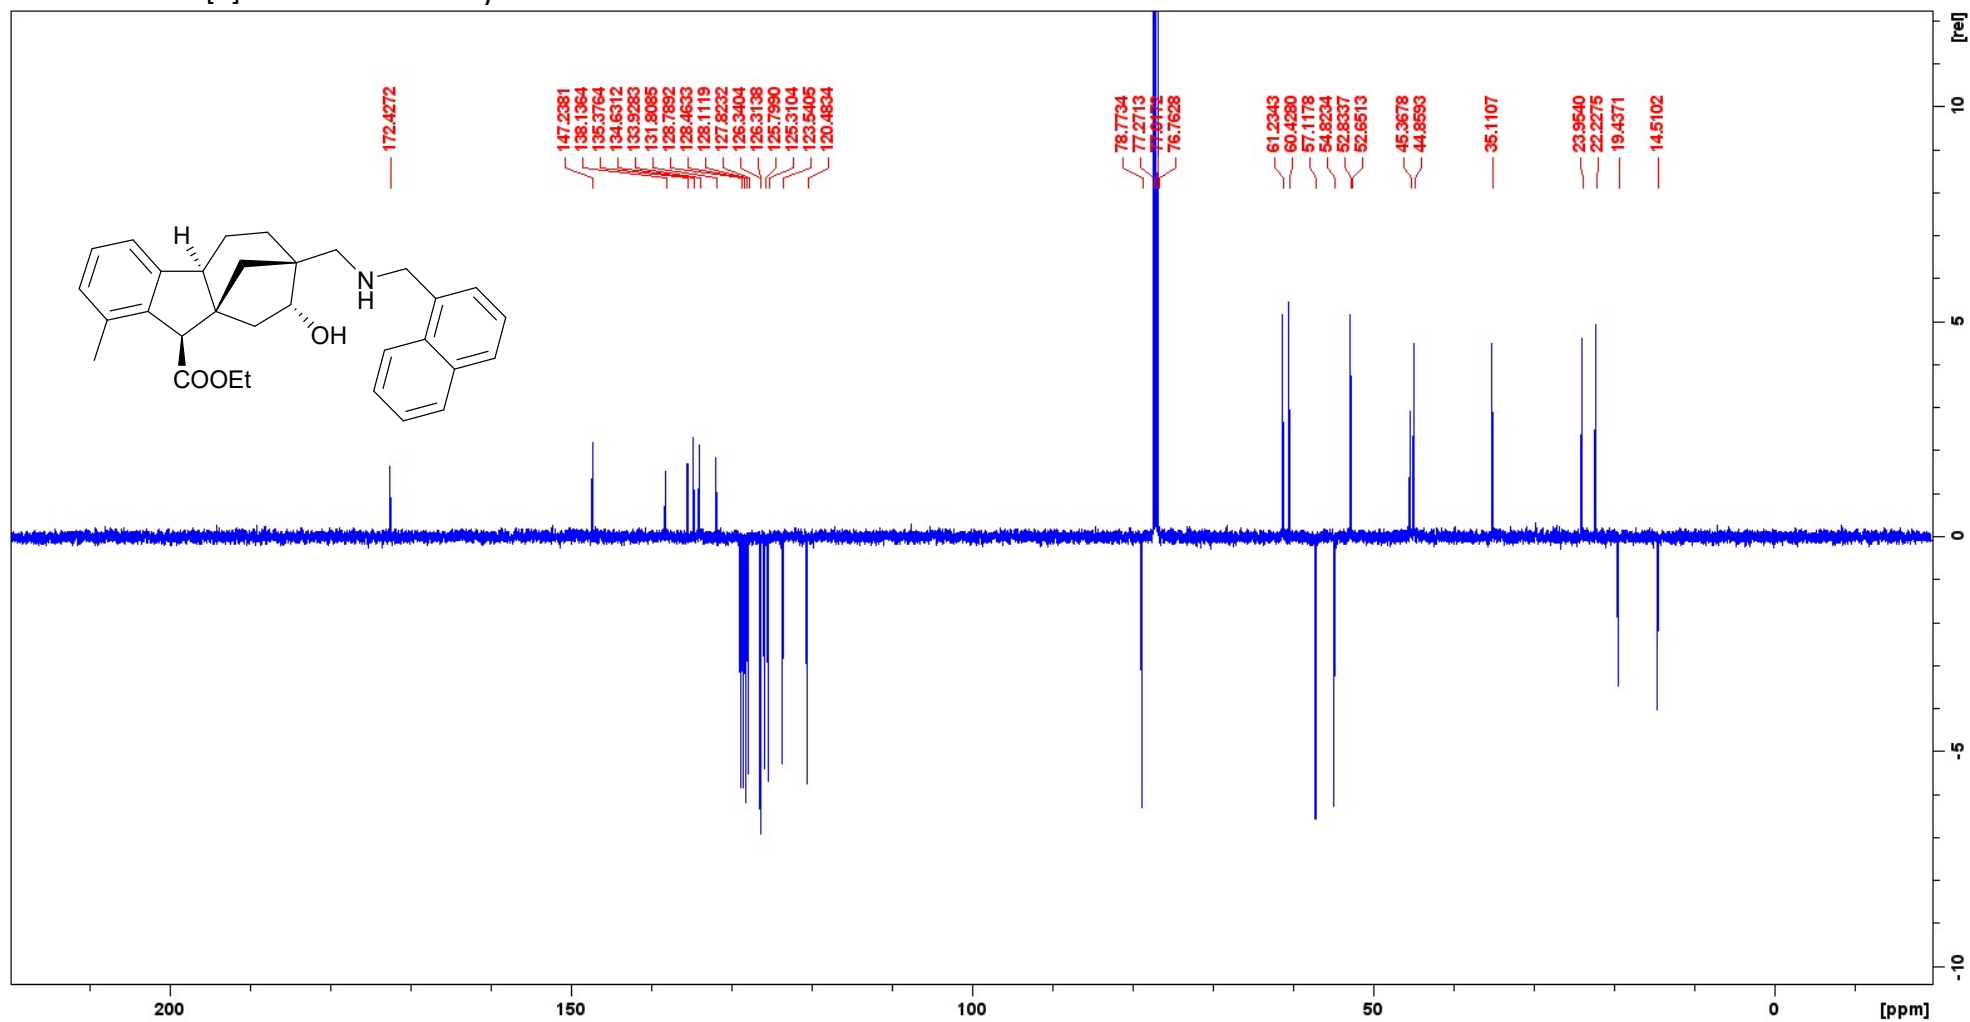

COSY of ethyl (4*S*,7*S*,8*R*,9*aS*,10*R*)-8-hydroxy-1-methyl-7-(((naphthalen-1-ylmethyl)amino)methyl)-4*b*,6,7,8,9,10-hexahydro-5*H*-7,9*a*-methanobenzo[*a*]azulene-10-carboxylate **31**

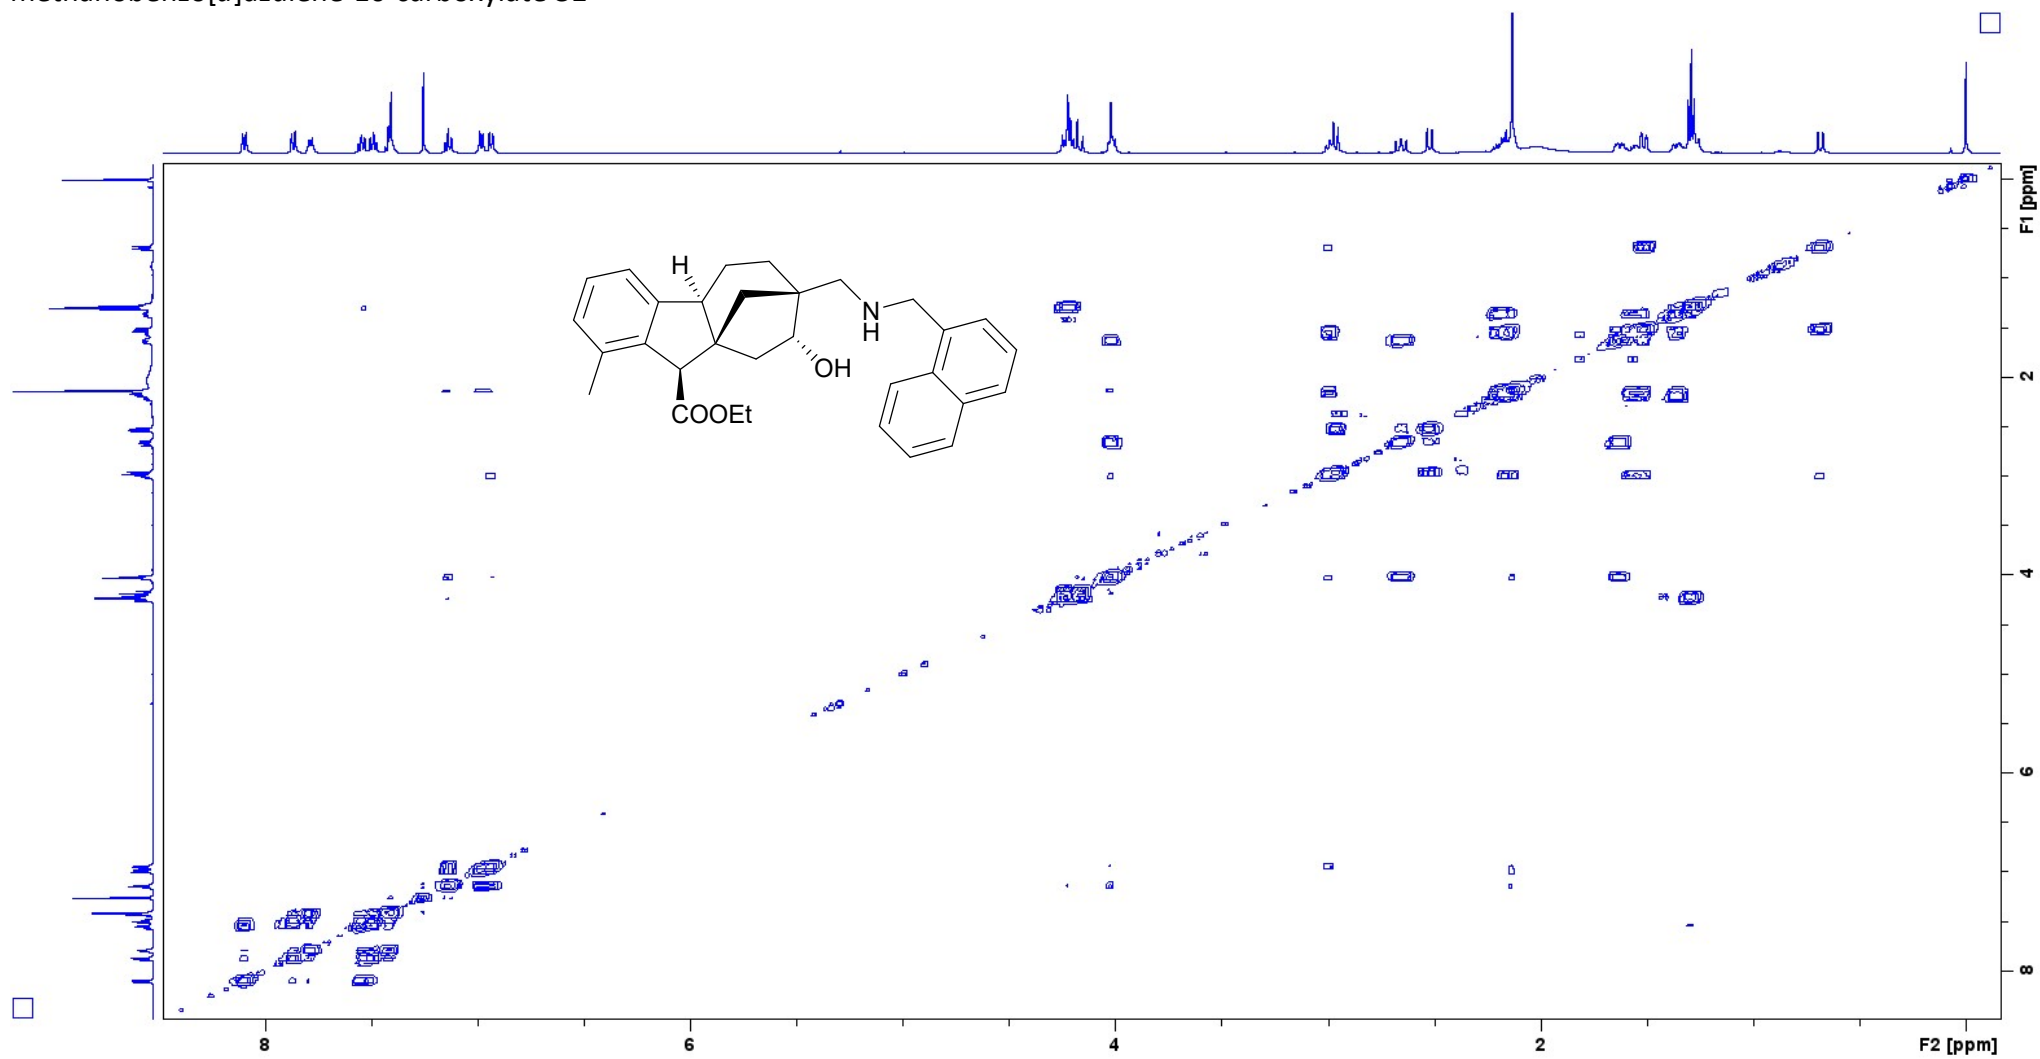

NOESY of ethyl (4*b*S,7*S*,8*R*,9*a*S,10*R*)-8-hydroxy-1-methyl-7-(((naphthalen-1-ylmethyl)amino)methyl)-4*b*,6,7,8,9,10-hexahydro-5*H*-7,9*a*-methanobenzo[*a*]azulene-10-carboxylate **31**

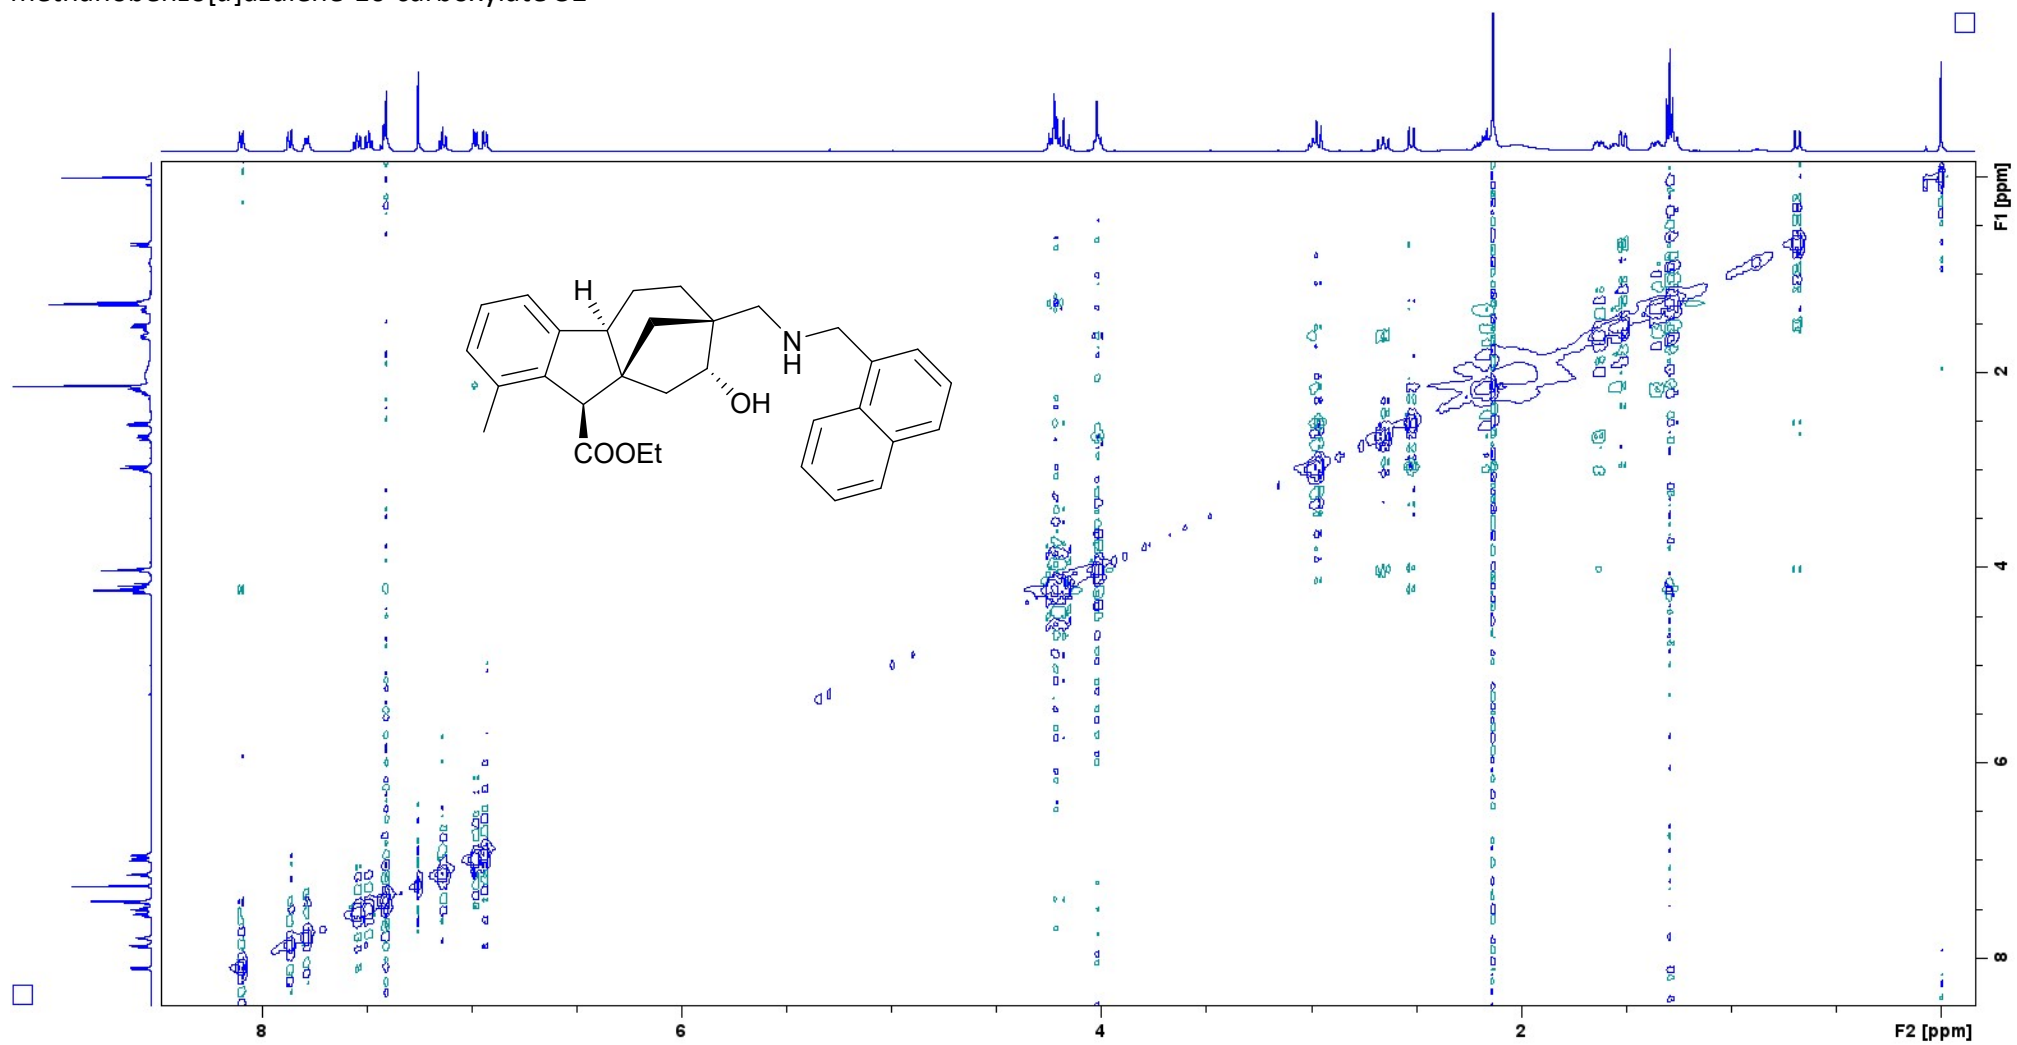

HSQC of ethyl (4*S*,7*S*,8*R*,9*aS*,10*R*)-8-hydroxy-1-methyl-7-(((naphthalen-1-ylmethyl)amino)methyl)-4*b*,6,7,8,9,10-hexahydro-5*H*-7,9*a*-methanobenzo[*a*]azulene-10-carboxylate **31**

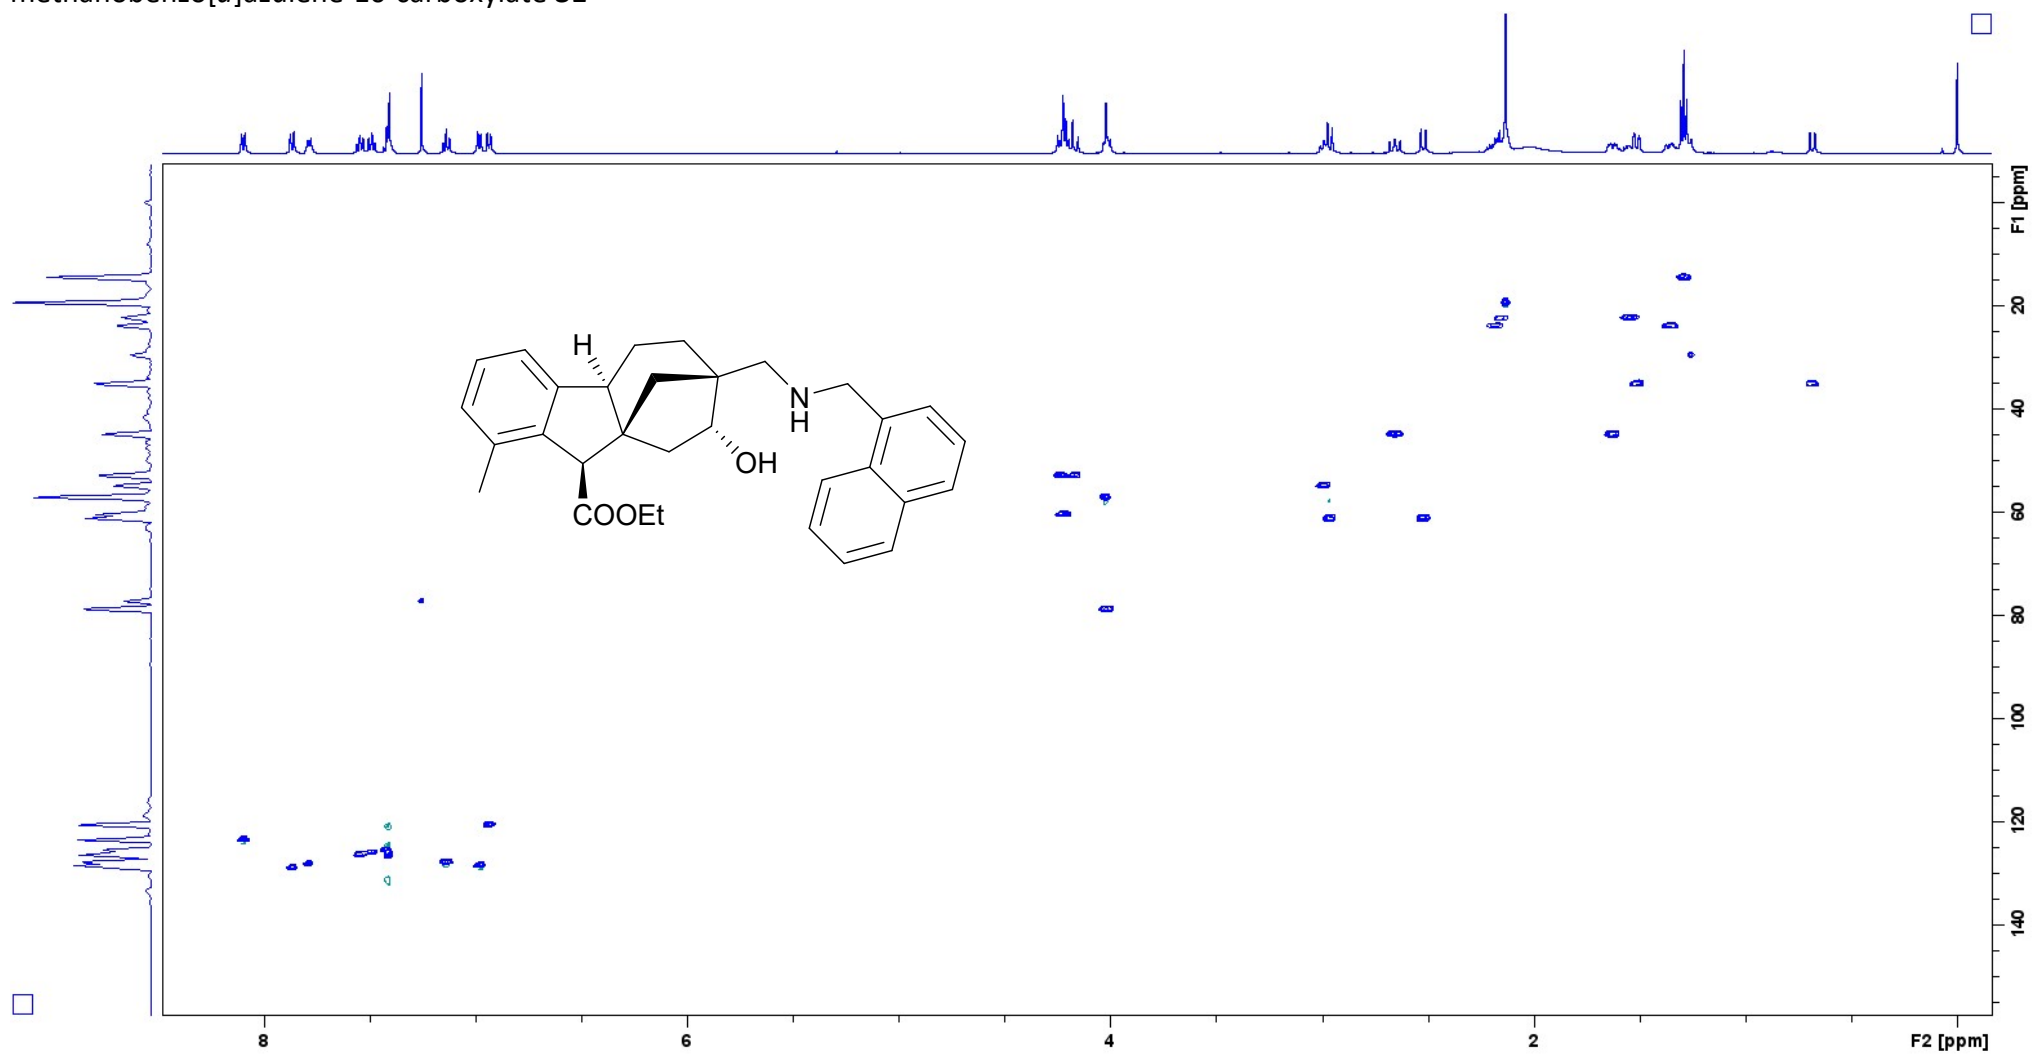

HMBC of ethyl (4*S*,7*S*,8*R*,9*aS*,10*R*)-8-hydroxy-1-methyl-7-(((naphthalen-1-ylmethyl)amino)methyl)-4*b*,6,7,8,9,10-hexahydro-5*H*-7,9*a*-methanobenzo[*a*]azulene-10-carboxylate **31**

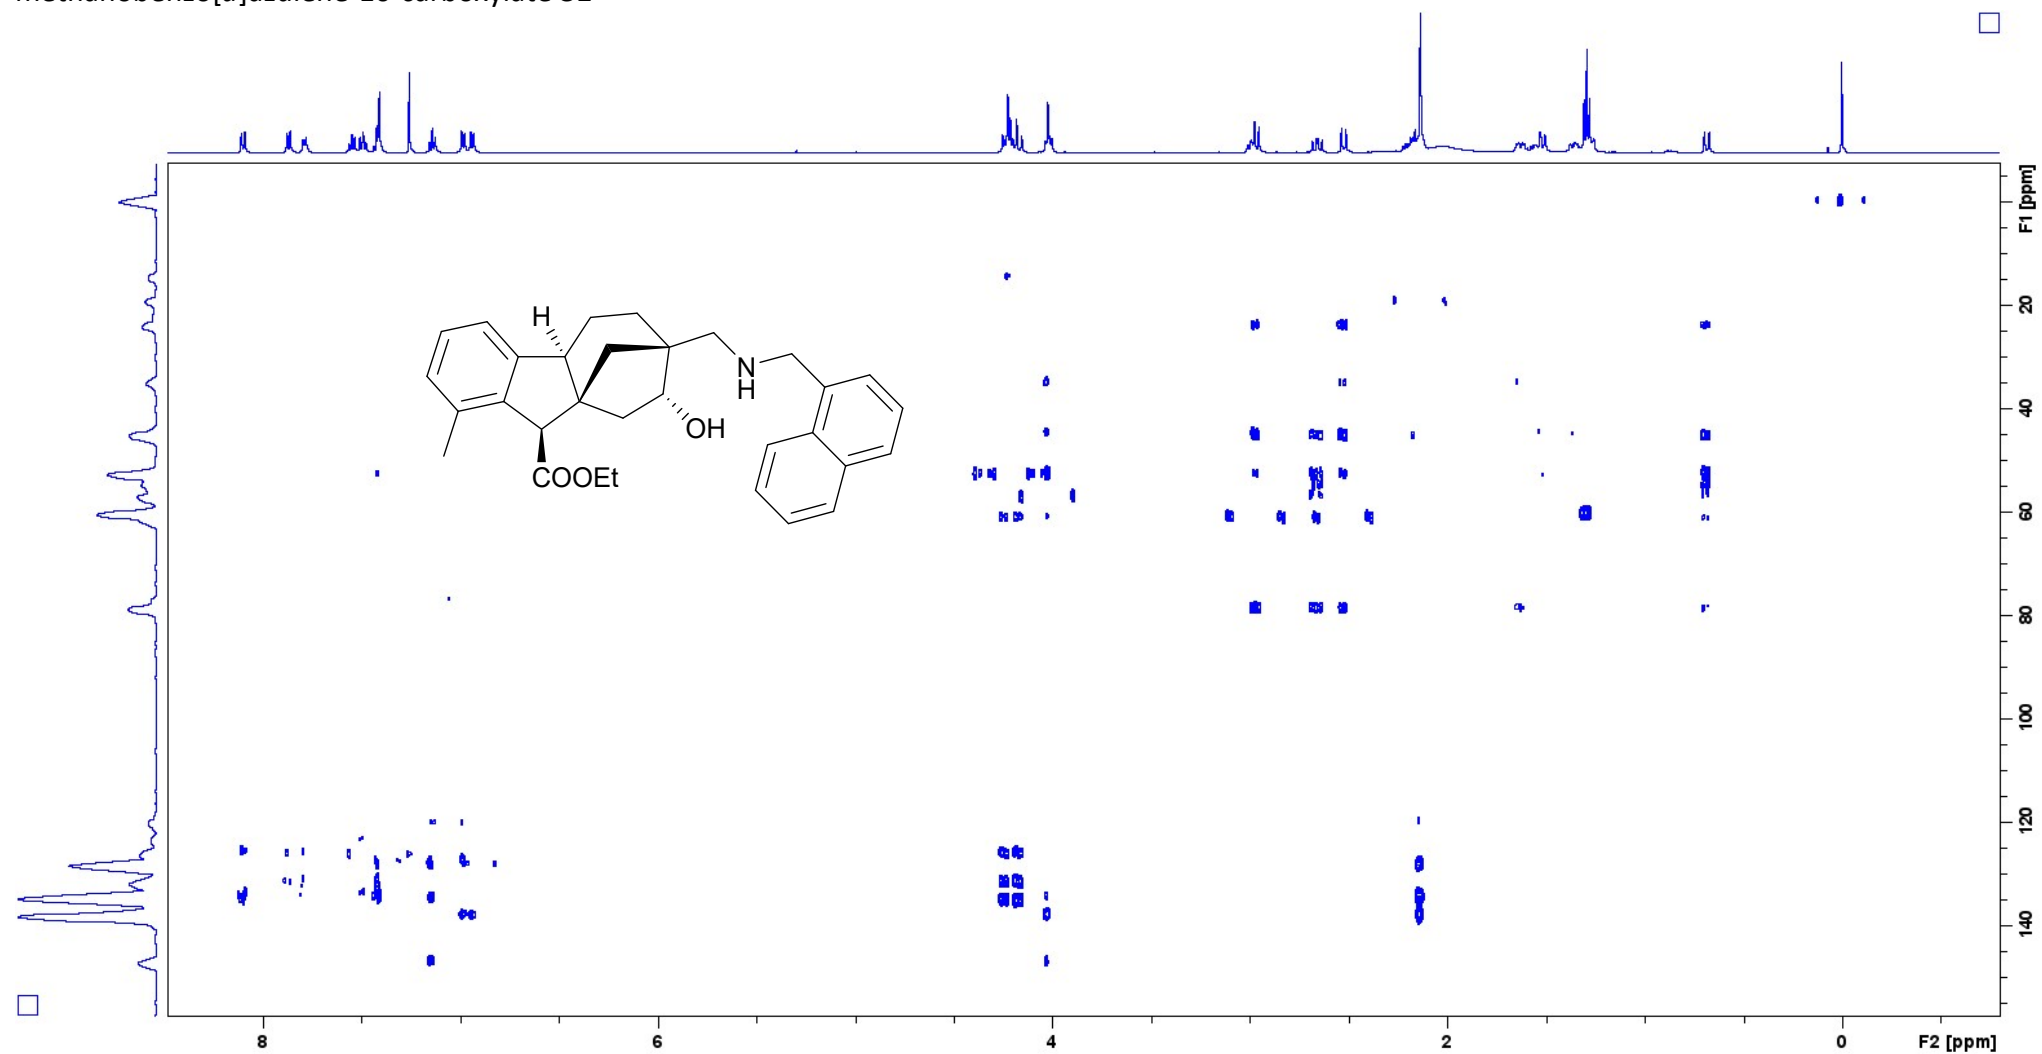

<sup>1</sup>H-NMR of ethyl (4bS,7S,8R,9aS,10R)-7-(((4-fluorobenzyl)amino)methyl)-8-hydroxy-1-methyl-4b,6,7,8,9,10-hexahydro-5H-7,9a-methanobenzo[*a*]azulene-10-carboxylate **32**

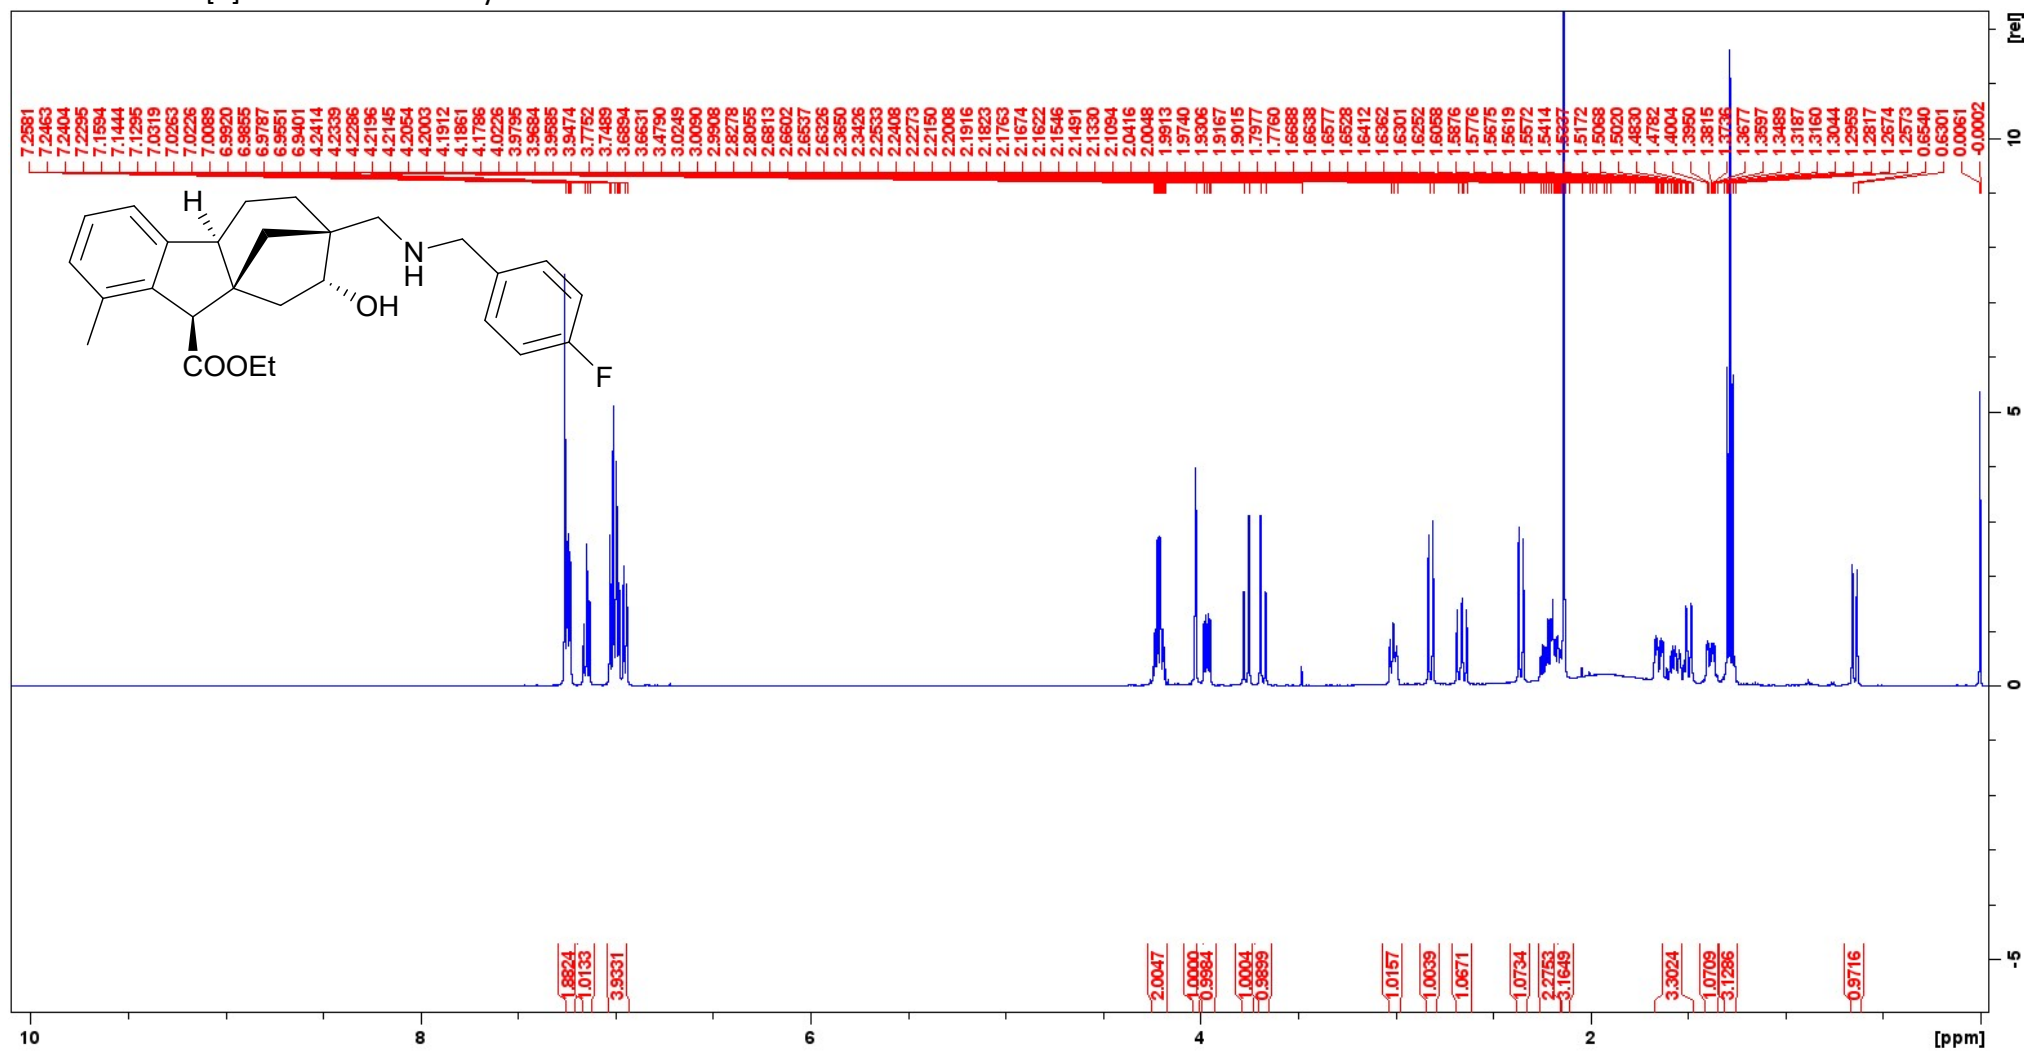

<sup>13</sup>C-NMR of ethyl (4*bS*,7*S*,8*R*,9*aS*,10*R*)-7-(((4-fluorobenzyl)amino)methyl)-8-hydroxy-1-methyl-4*b*,6,7,8,9,10-hexahydro-5*H*-7,9*a*-methanobenzo[*a*]azulene-10-carboxylate **32**

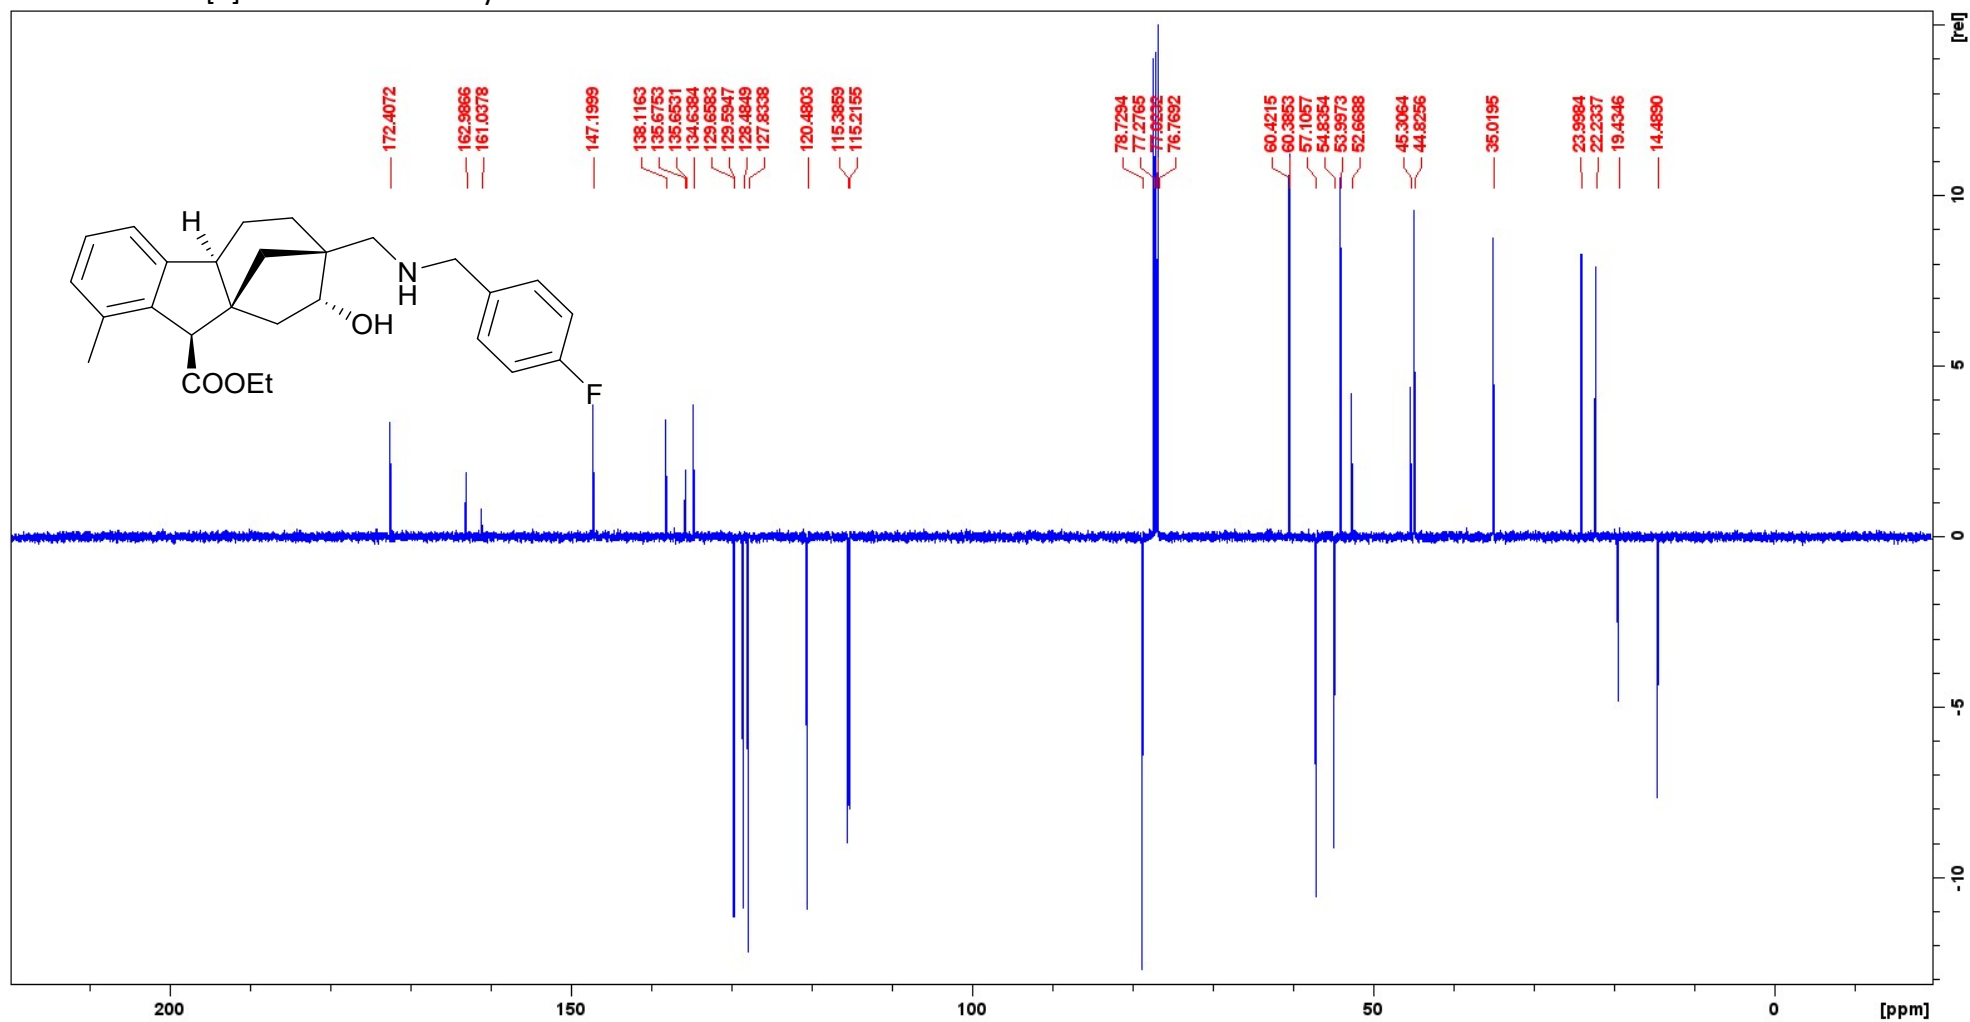

COSY of ethyl (4*b*S,7*S*,8*R*,9*a*S,10*R*)-7-(((4-fluorobenzyl)amino)methyl)-8-hydroxy-1-methyl-4*b*,6,7,8,9,10-hexahydro-5*H*-7,9*a*-methanobenzo[*a*]azulene-10-carboxylate **32**

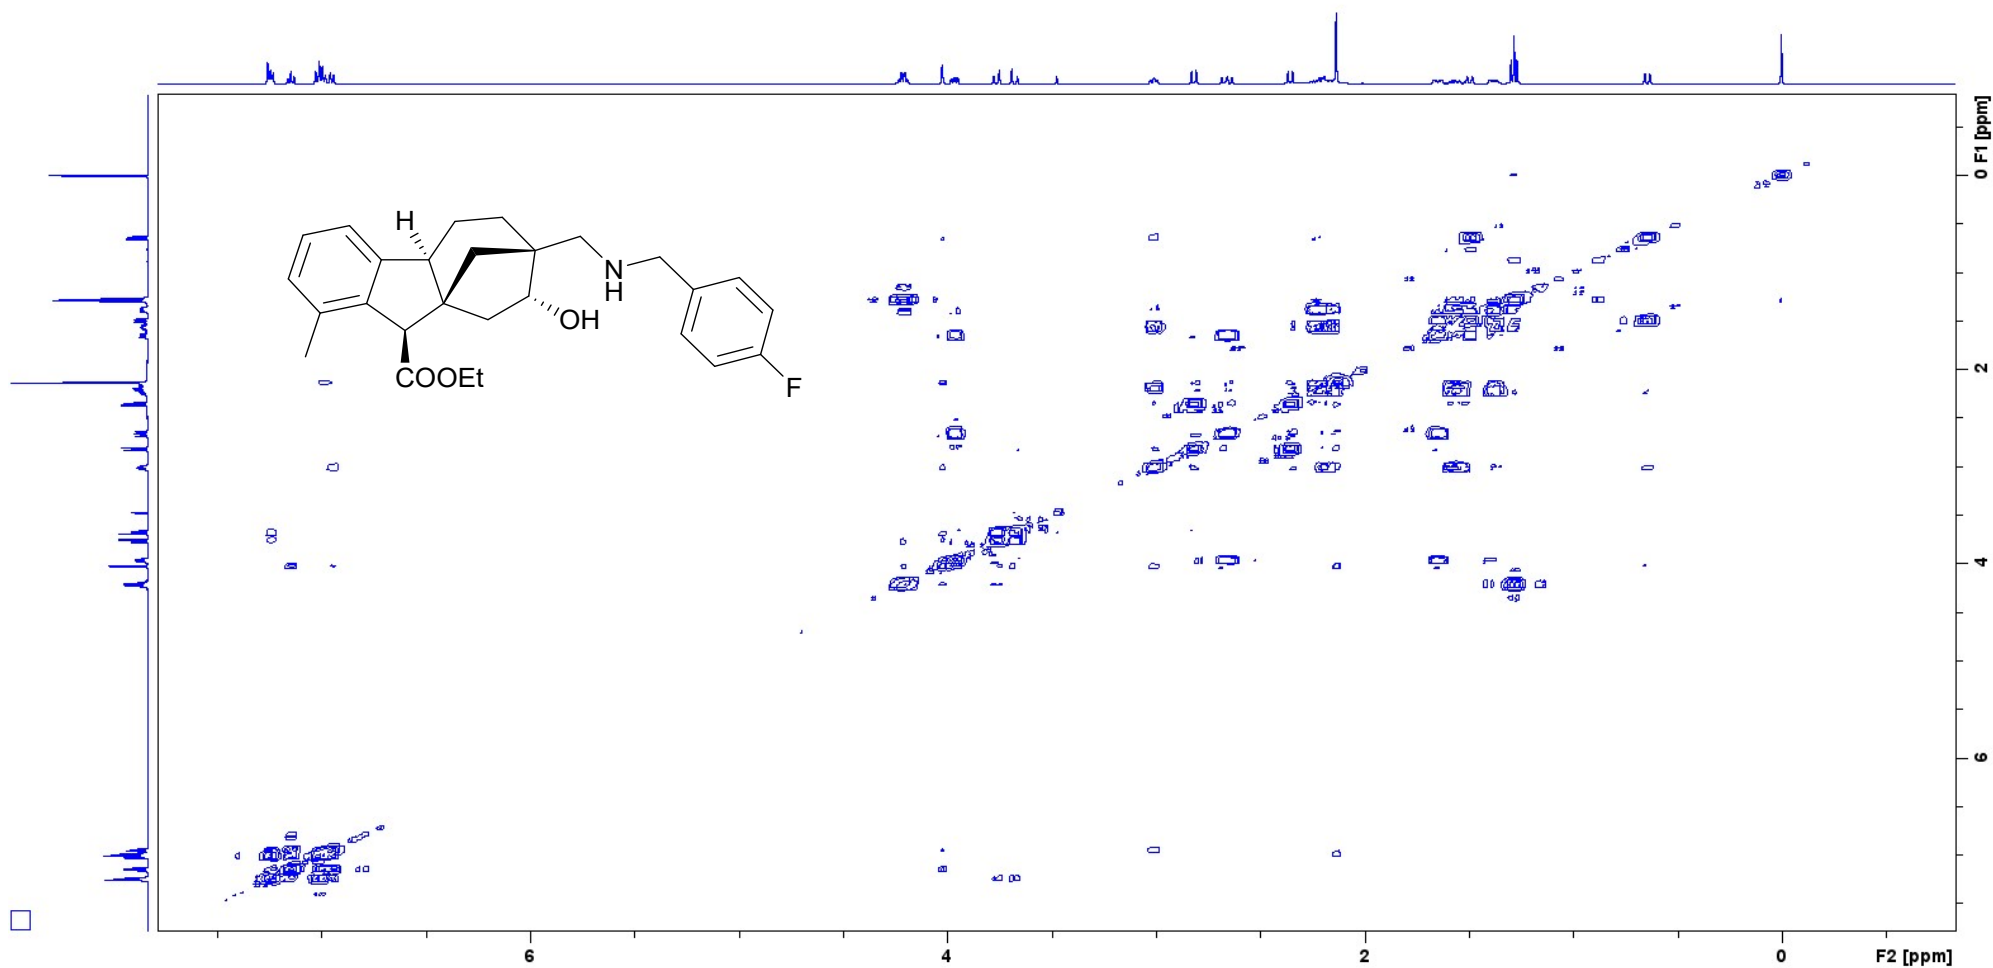



NOESY of ethyl (4*bS*,7*S*,8*R*,9*aS*,10*R*)-7-(((4-fluorobenzyl)amino)methyl)-8-hydroxy-1-methyl-4*b*,6,7,8,9,10-hexahydro-5*H*-7,9*a*-methanobenzo[*a*]azulene-10-carboxylate **32**

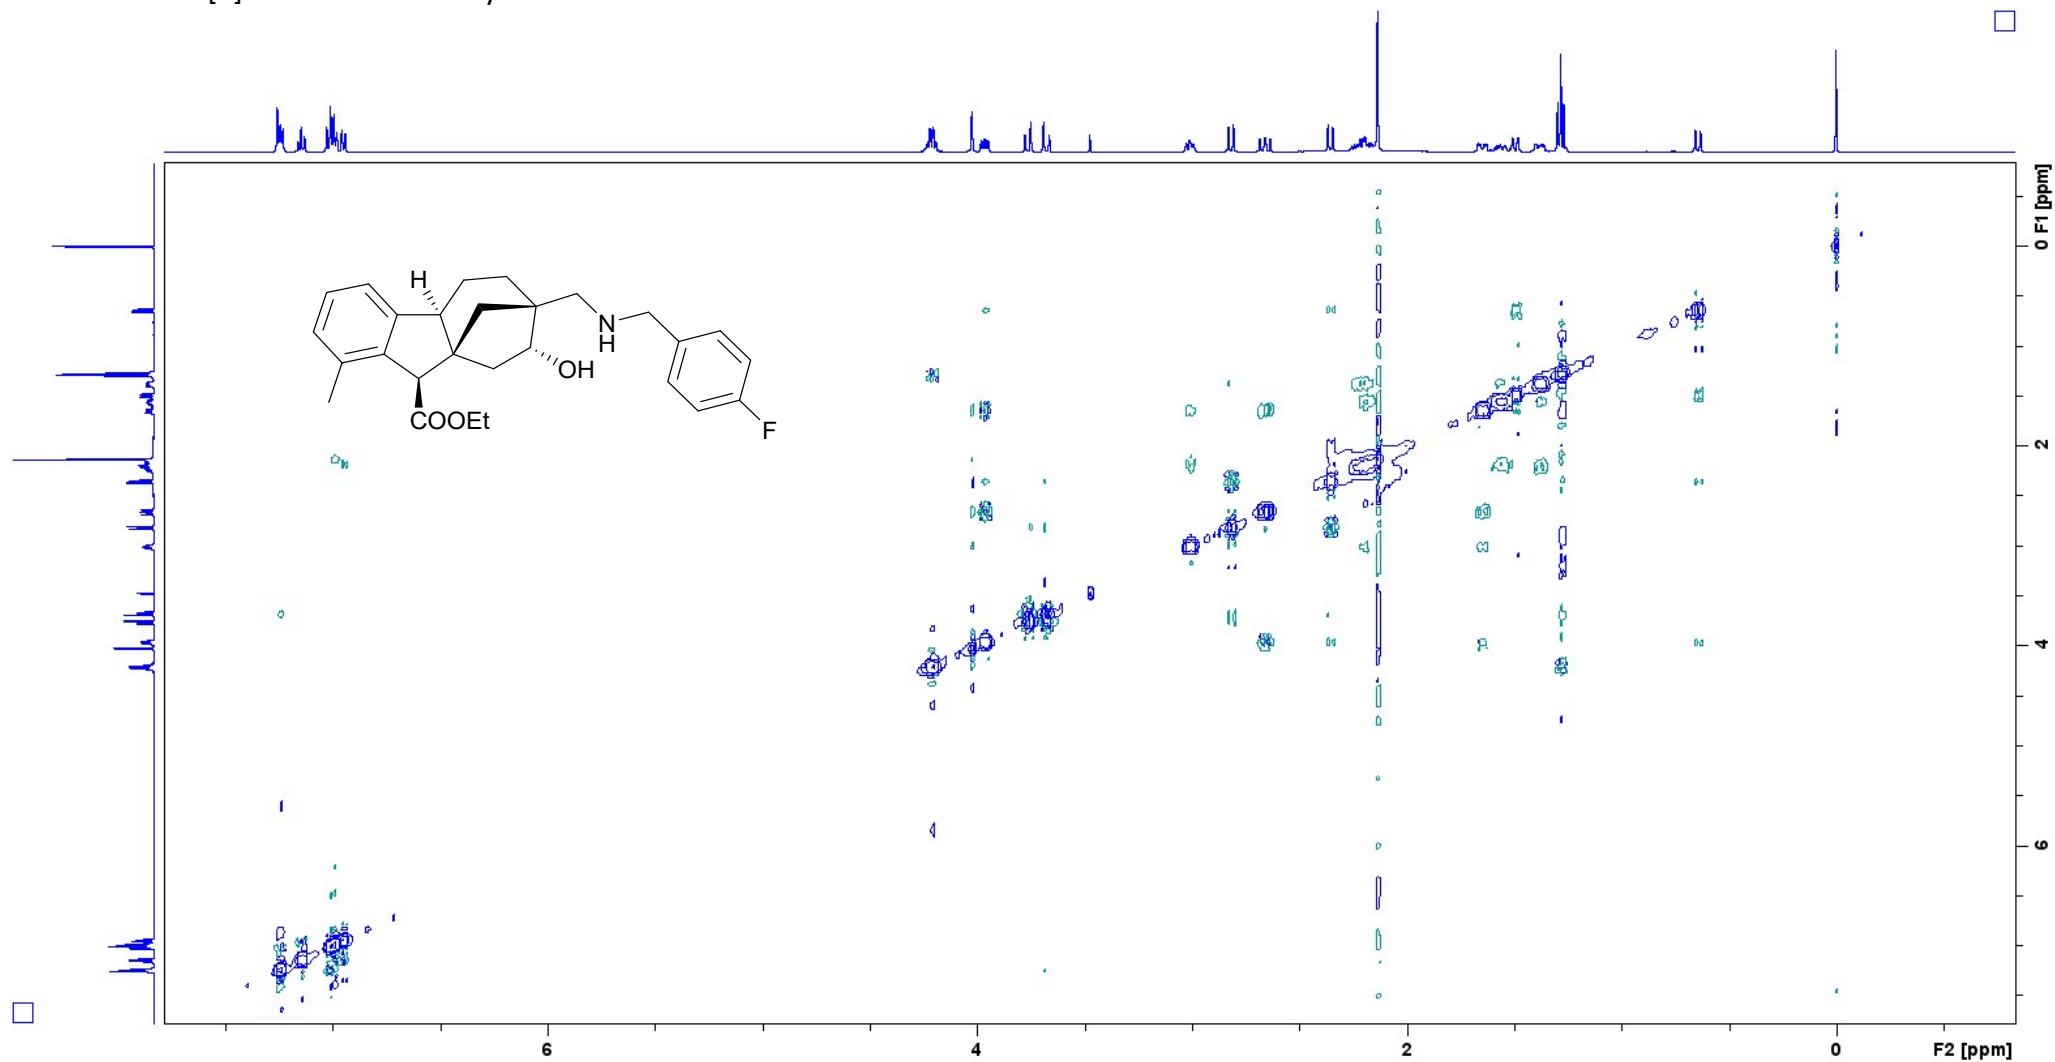

HSQC of ethyl (4*b**S*,7*S*,8*R*,9*a**S*,10*R*)-7-(((4-fluorobenzyl)amino)methyl)-8-hydroxy-1-methyl-4*b*,6,7,8,9,10-hexahydro-5*H*-7,9*a*-methanobenzo[*a*]azulene-10-carboxylate **32**

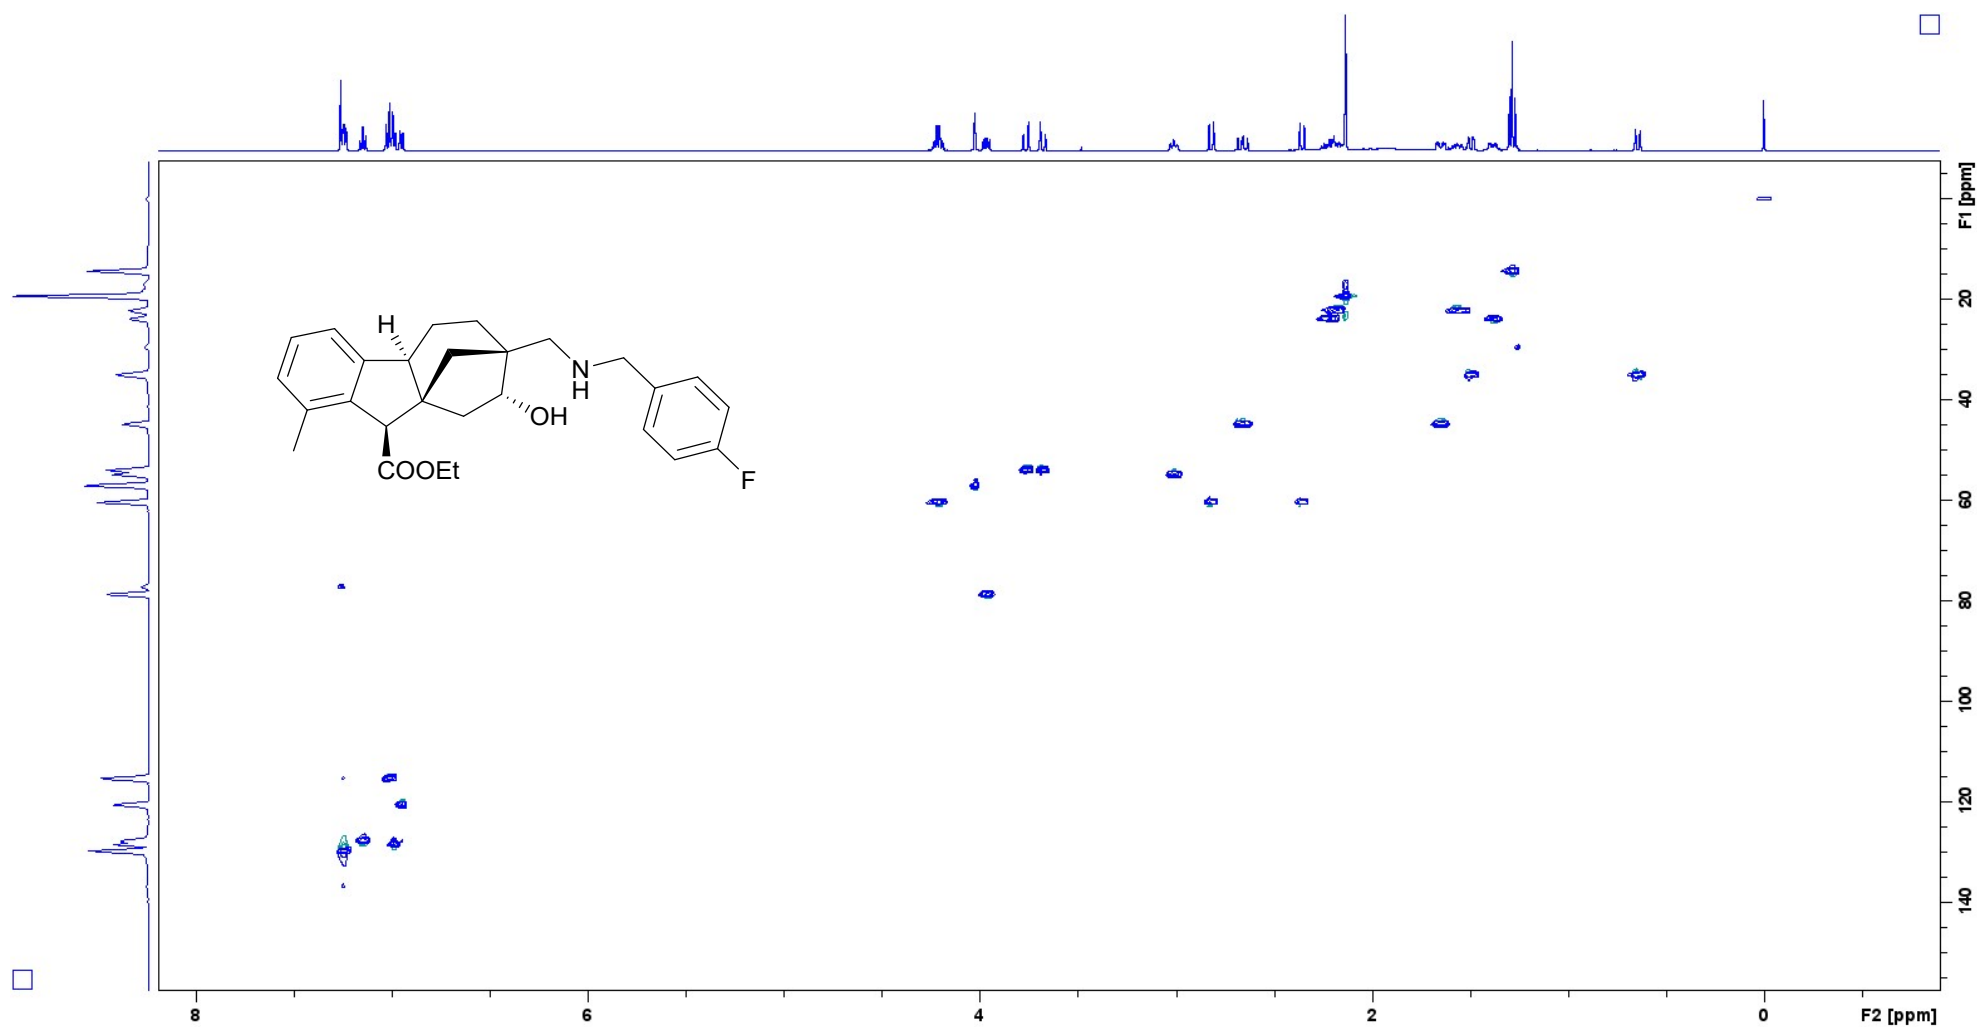

HMBC of ethyl (4*b*S,7*S*,8*R*,9*a*S,10*R*)-7-(((4-fluorobenzyl)amino)methyl)-8-hydroxy-1-methyl-4*b*,6,7,8,9,10-hexahydro-5*H*-7,9*a*-methanobenzo[*a*]azulene-10-carboxylate **32**

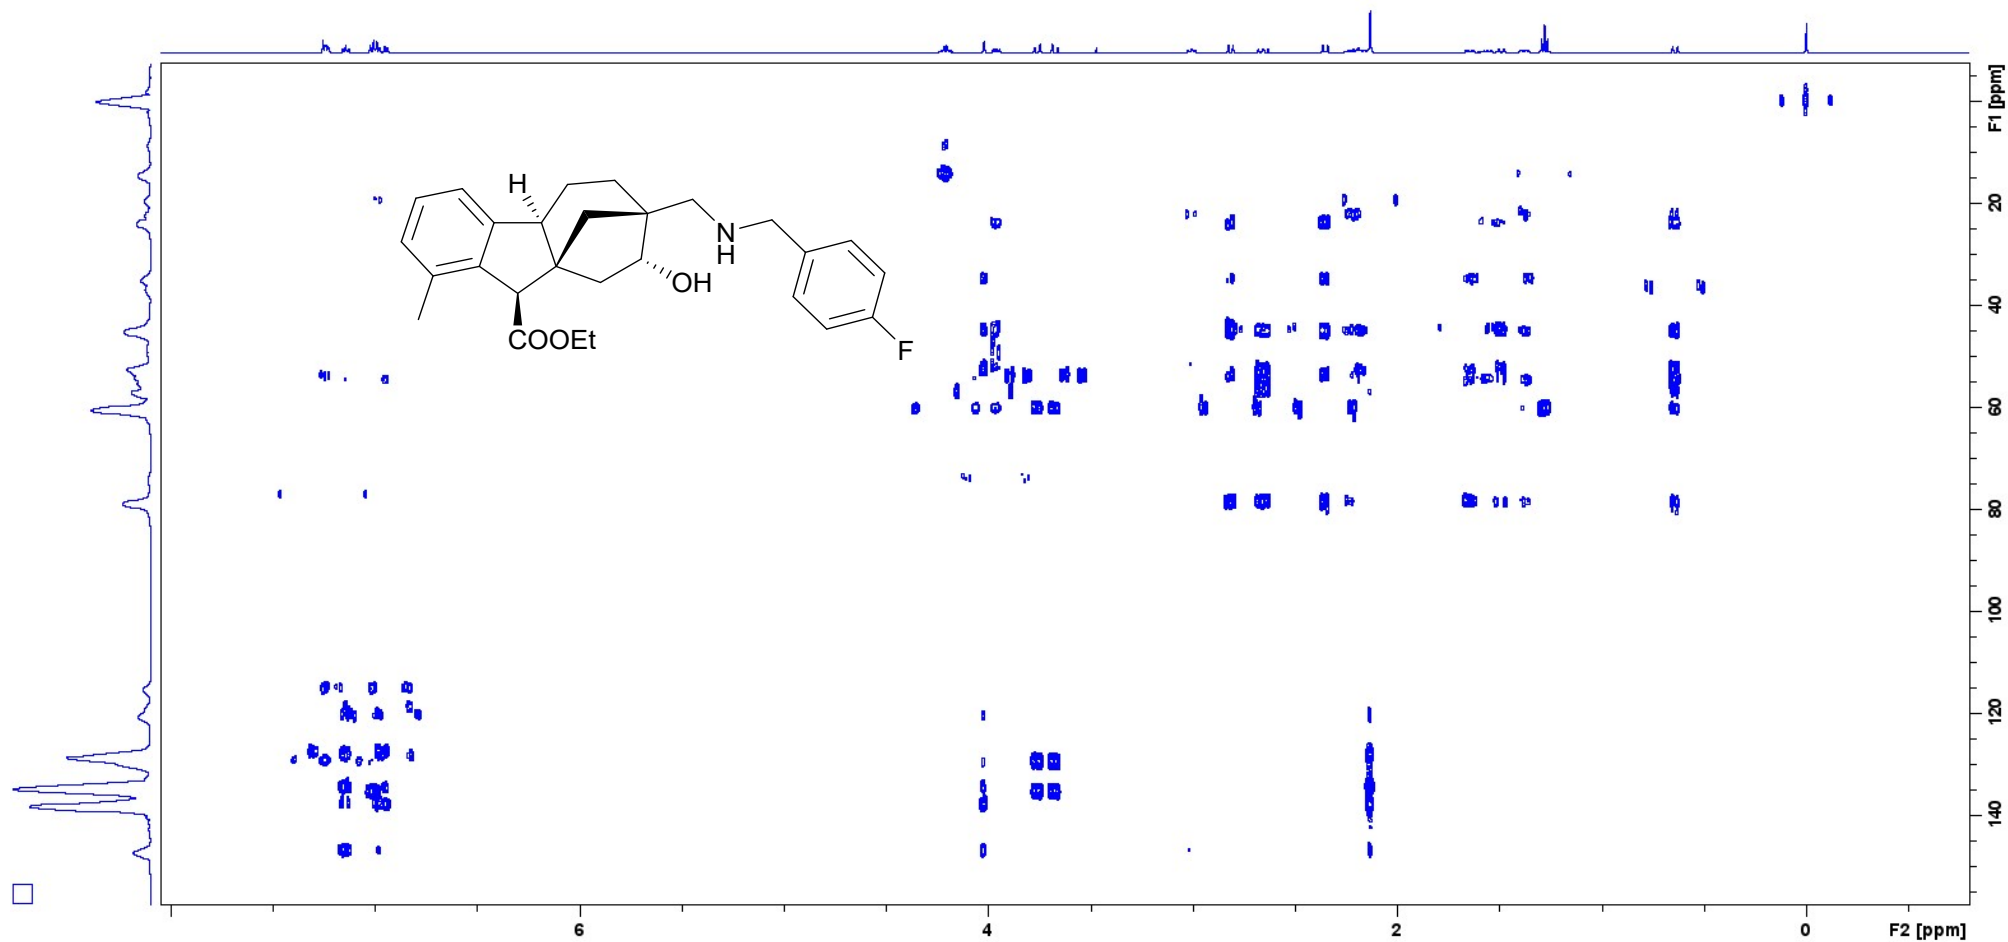

<sup>19</sup>F-NMR of ethyl (4*bS*,7*S*,8*R*,9*aS*,10*R*)-7-(((4-fluorobenzyl)amino)methyl)-8-hydroxy-1-methyl-4*b*,6,7,8,9,10-hexahydro-5*H*-7,9a-methanobenzo[*a*]azulene-10-carboxylate **32**

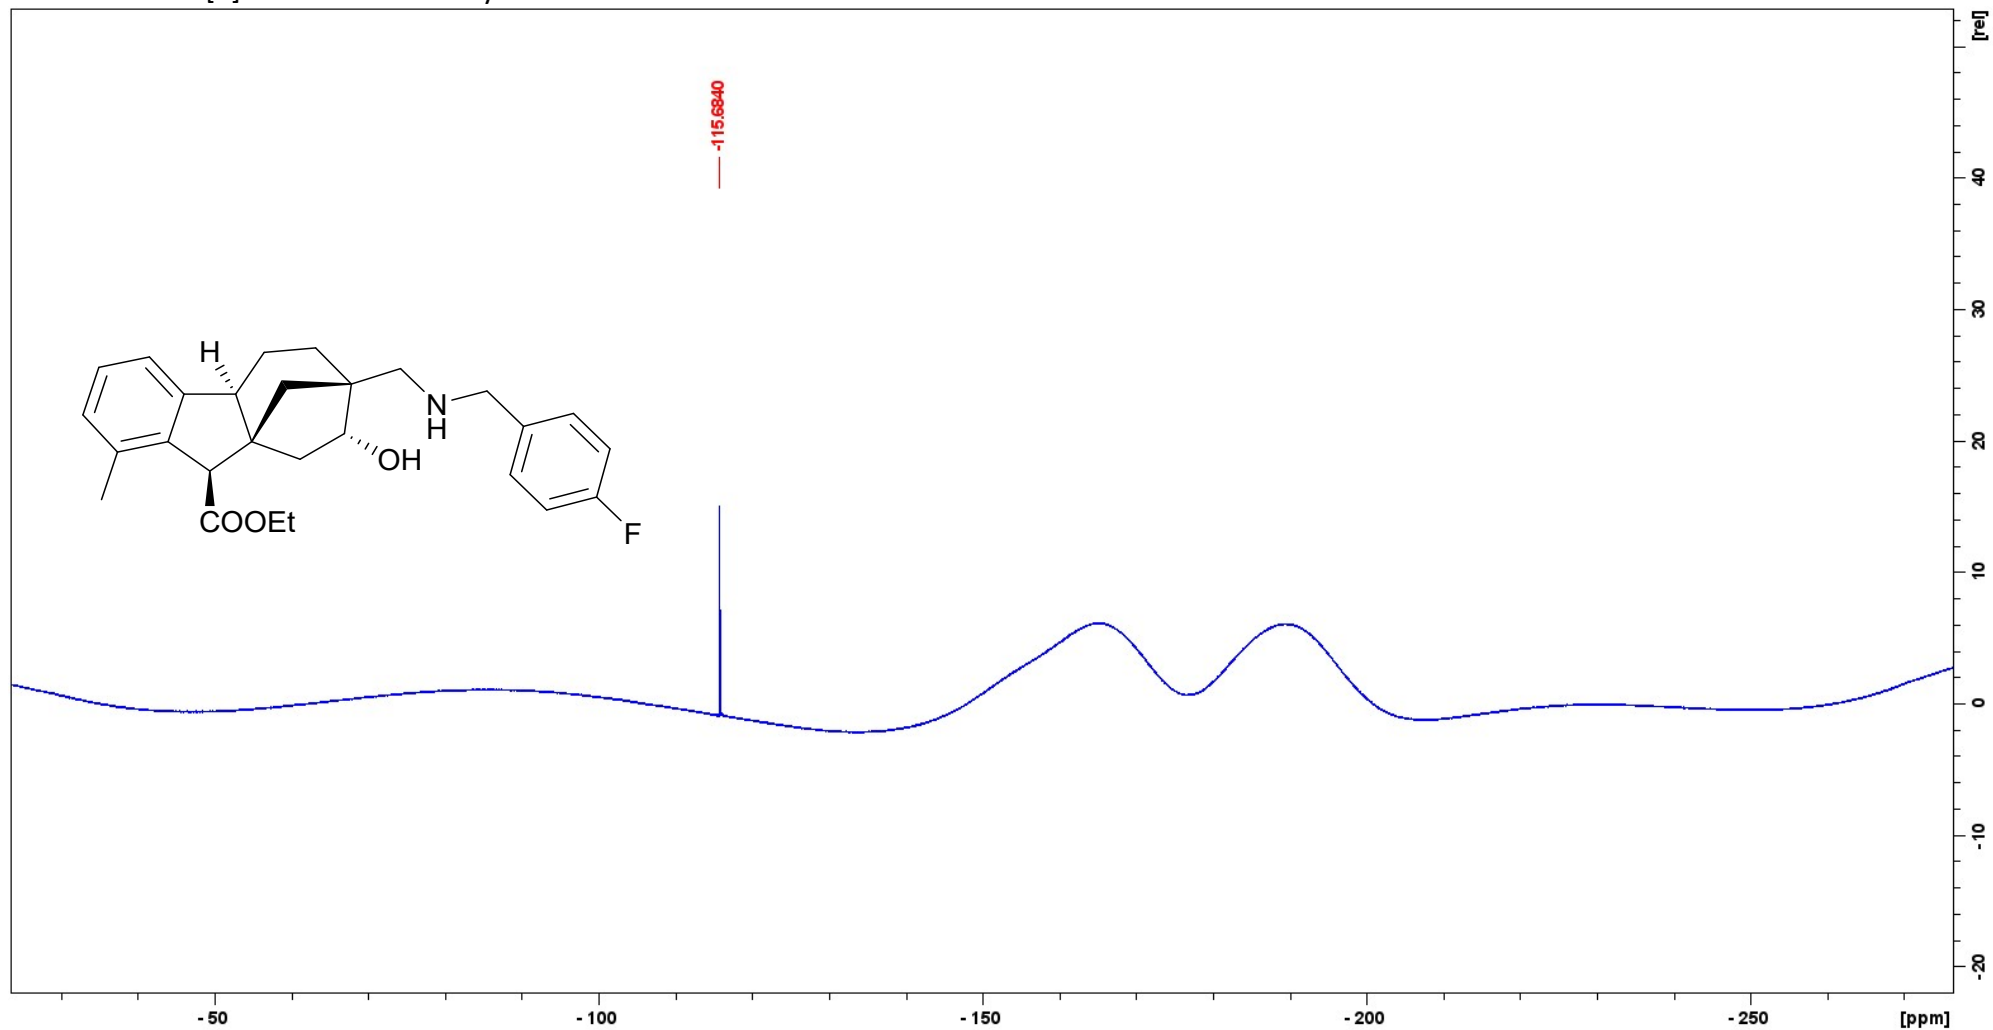

<sup>1</sup>H-NMR of ethyl (4*S*,7*S*,8*R*,9*aS*,10*R*)-8-hydroxy-7-(((4-methoxybenzyl)amino)methyl)-1-methyl-4*b*,6,7,8,9,10-hexahydro-5*H*-7,9*a*-methanobenzo[*a*]azulene-10-carboxylate **33**

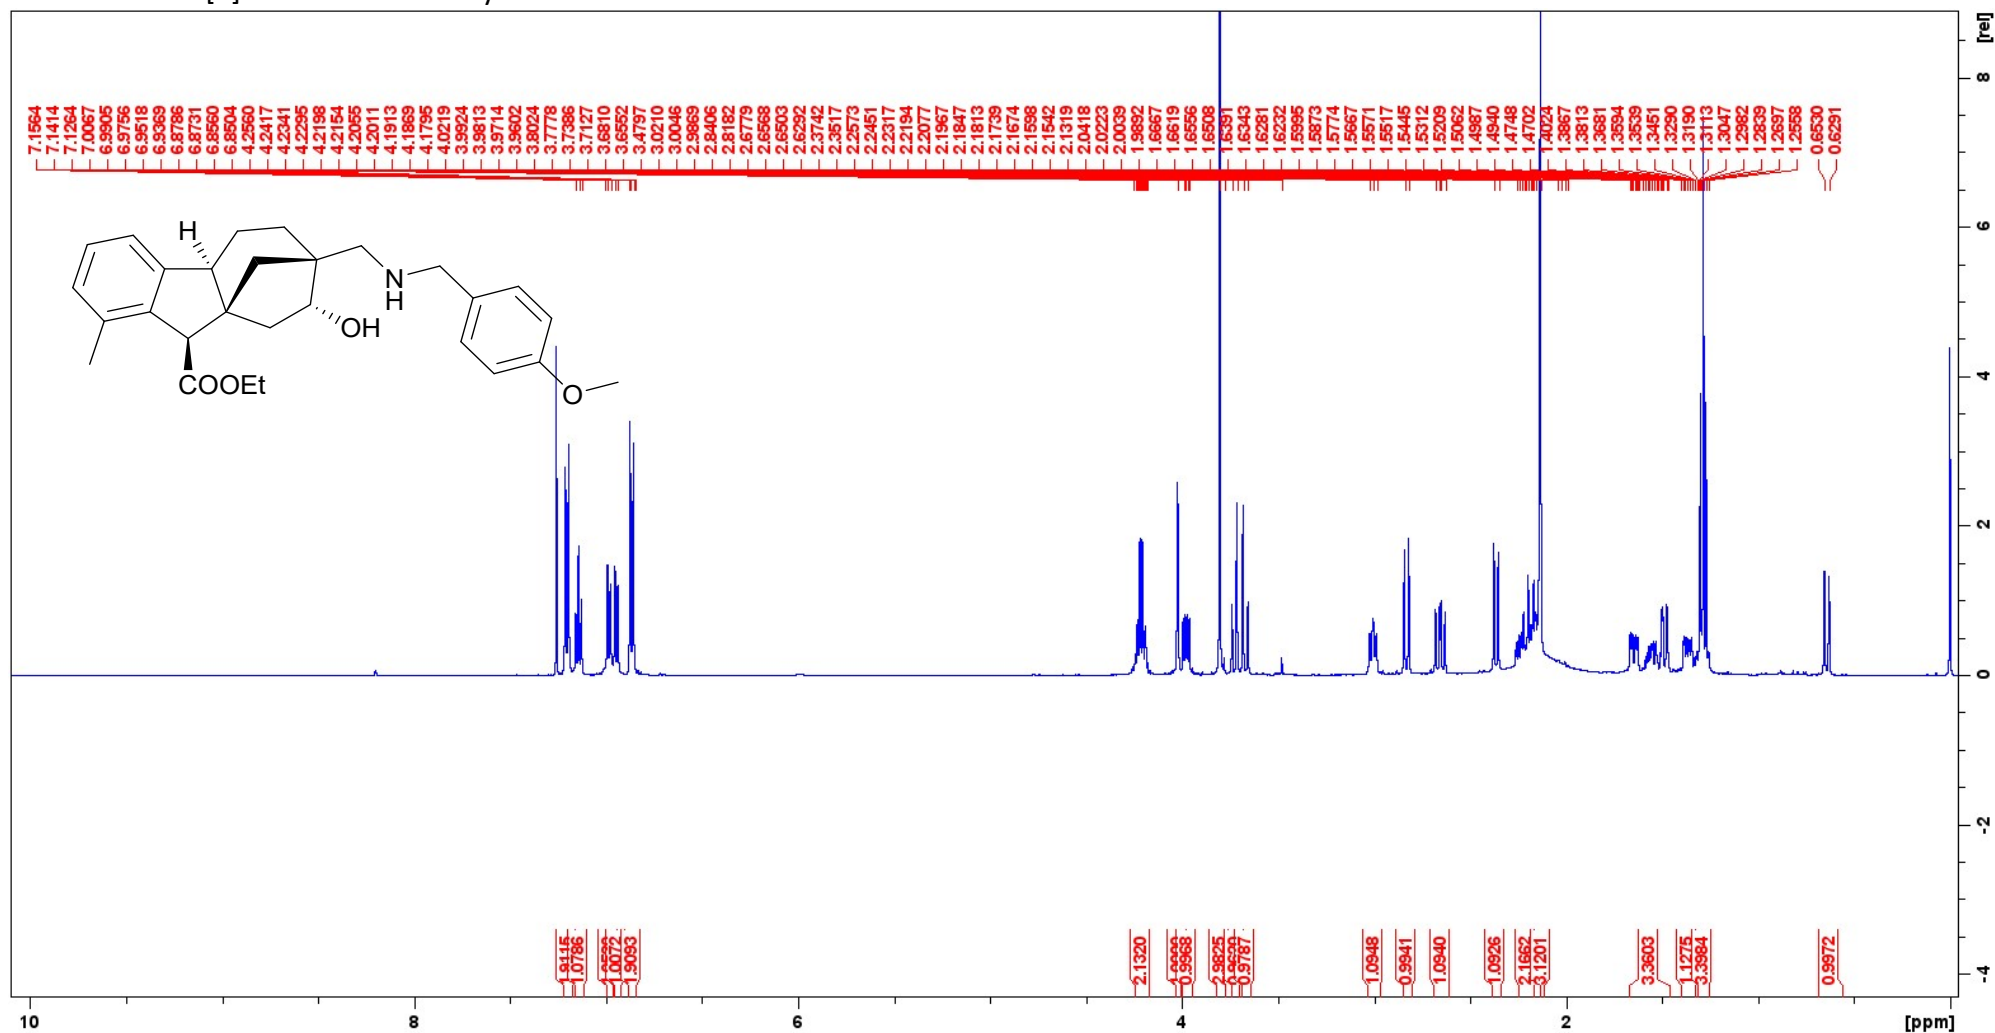

<sup>13</sup>C-NMR ethyl (4*S*,7*S*,8*R*,9*aS*,10*R*)-8-hydroxy-7-(((4-methoxybenzyl)amino)methyl)-1-methyl-4*b*,6,7,8,9,10-hexahydro-5*H*-7,9*a*-methanobenzo[*a*]azulene-10-carboxylate **33**

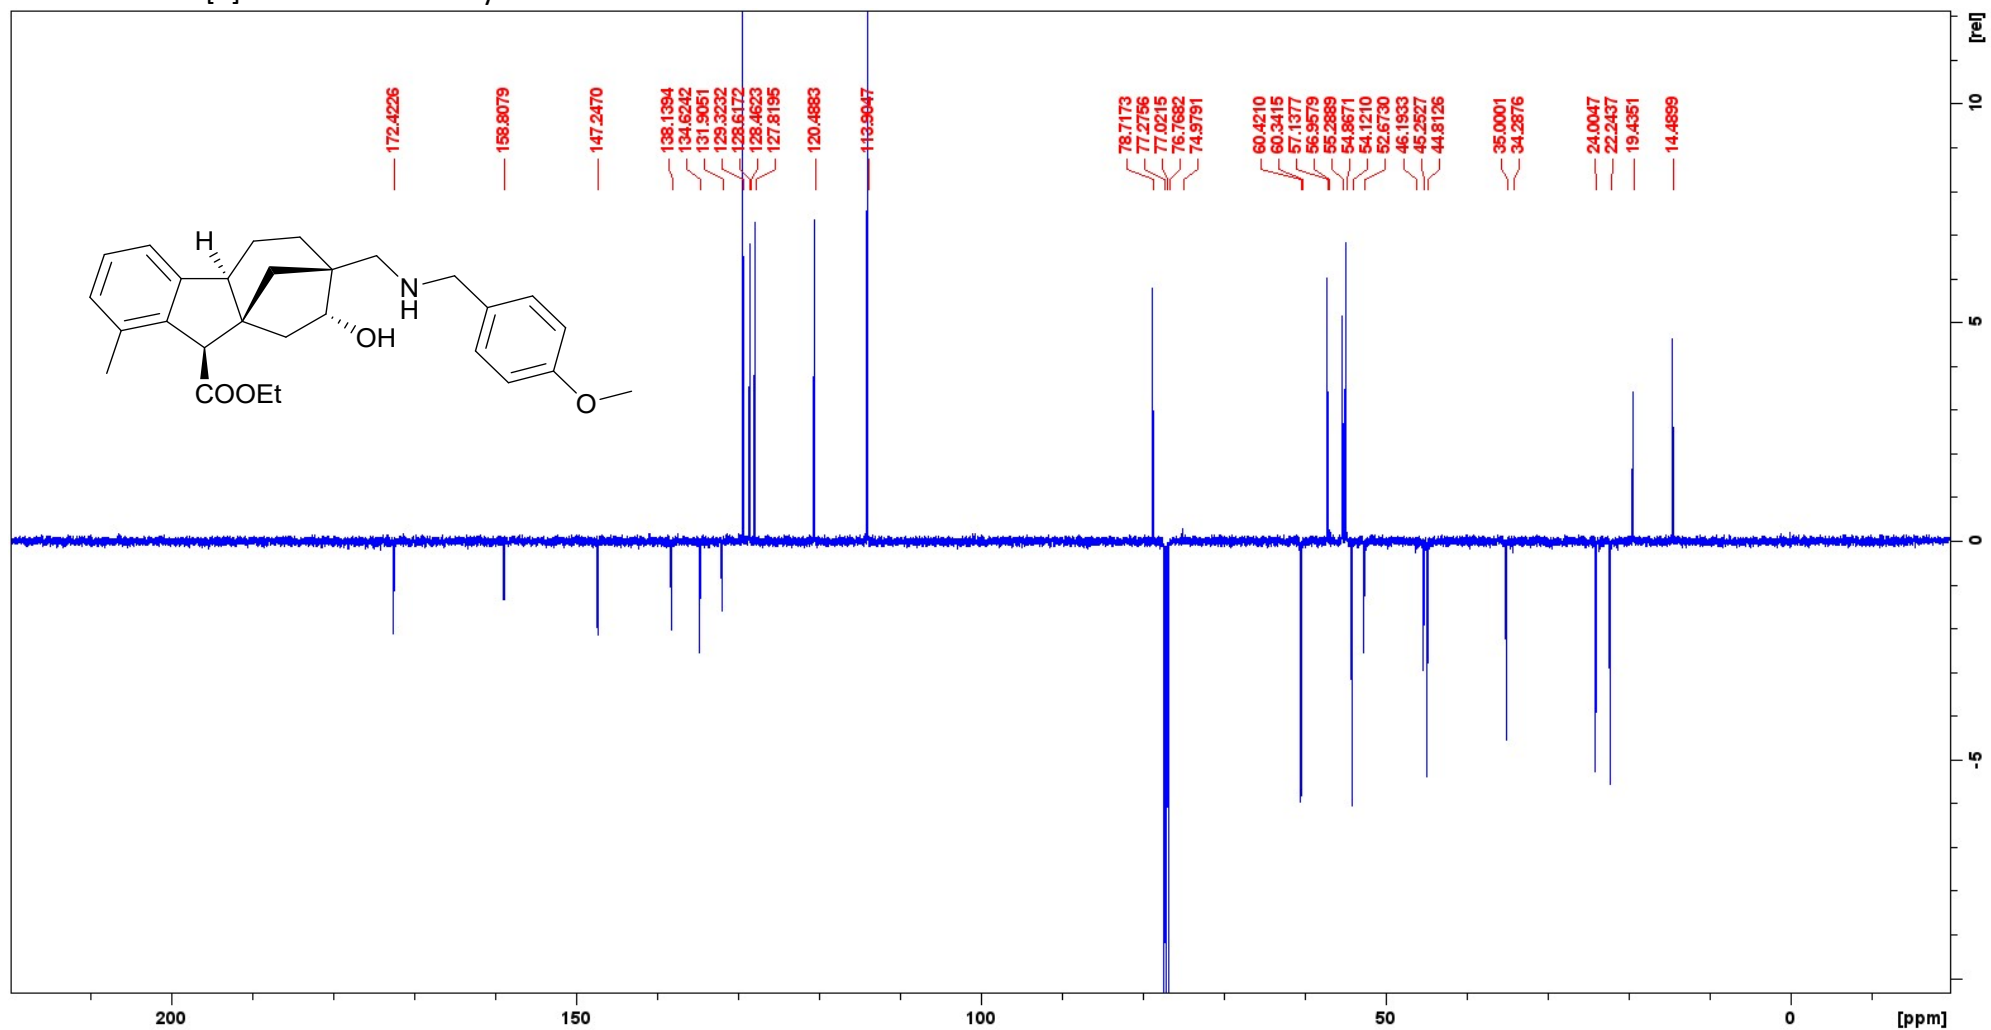

COSY of ethyl (4*S*,7*S*,8*R*,9*aS*,10*R*)-8-hydroxy-7-(((4-methoxybenzyl)amino)methyl)-1-methyl-4*b*,6,7,8,9,10-hexahydro-5*H*-7,9*a*-methanobenzo[*a*]azulene-10-carboxylate **33**

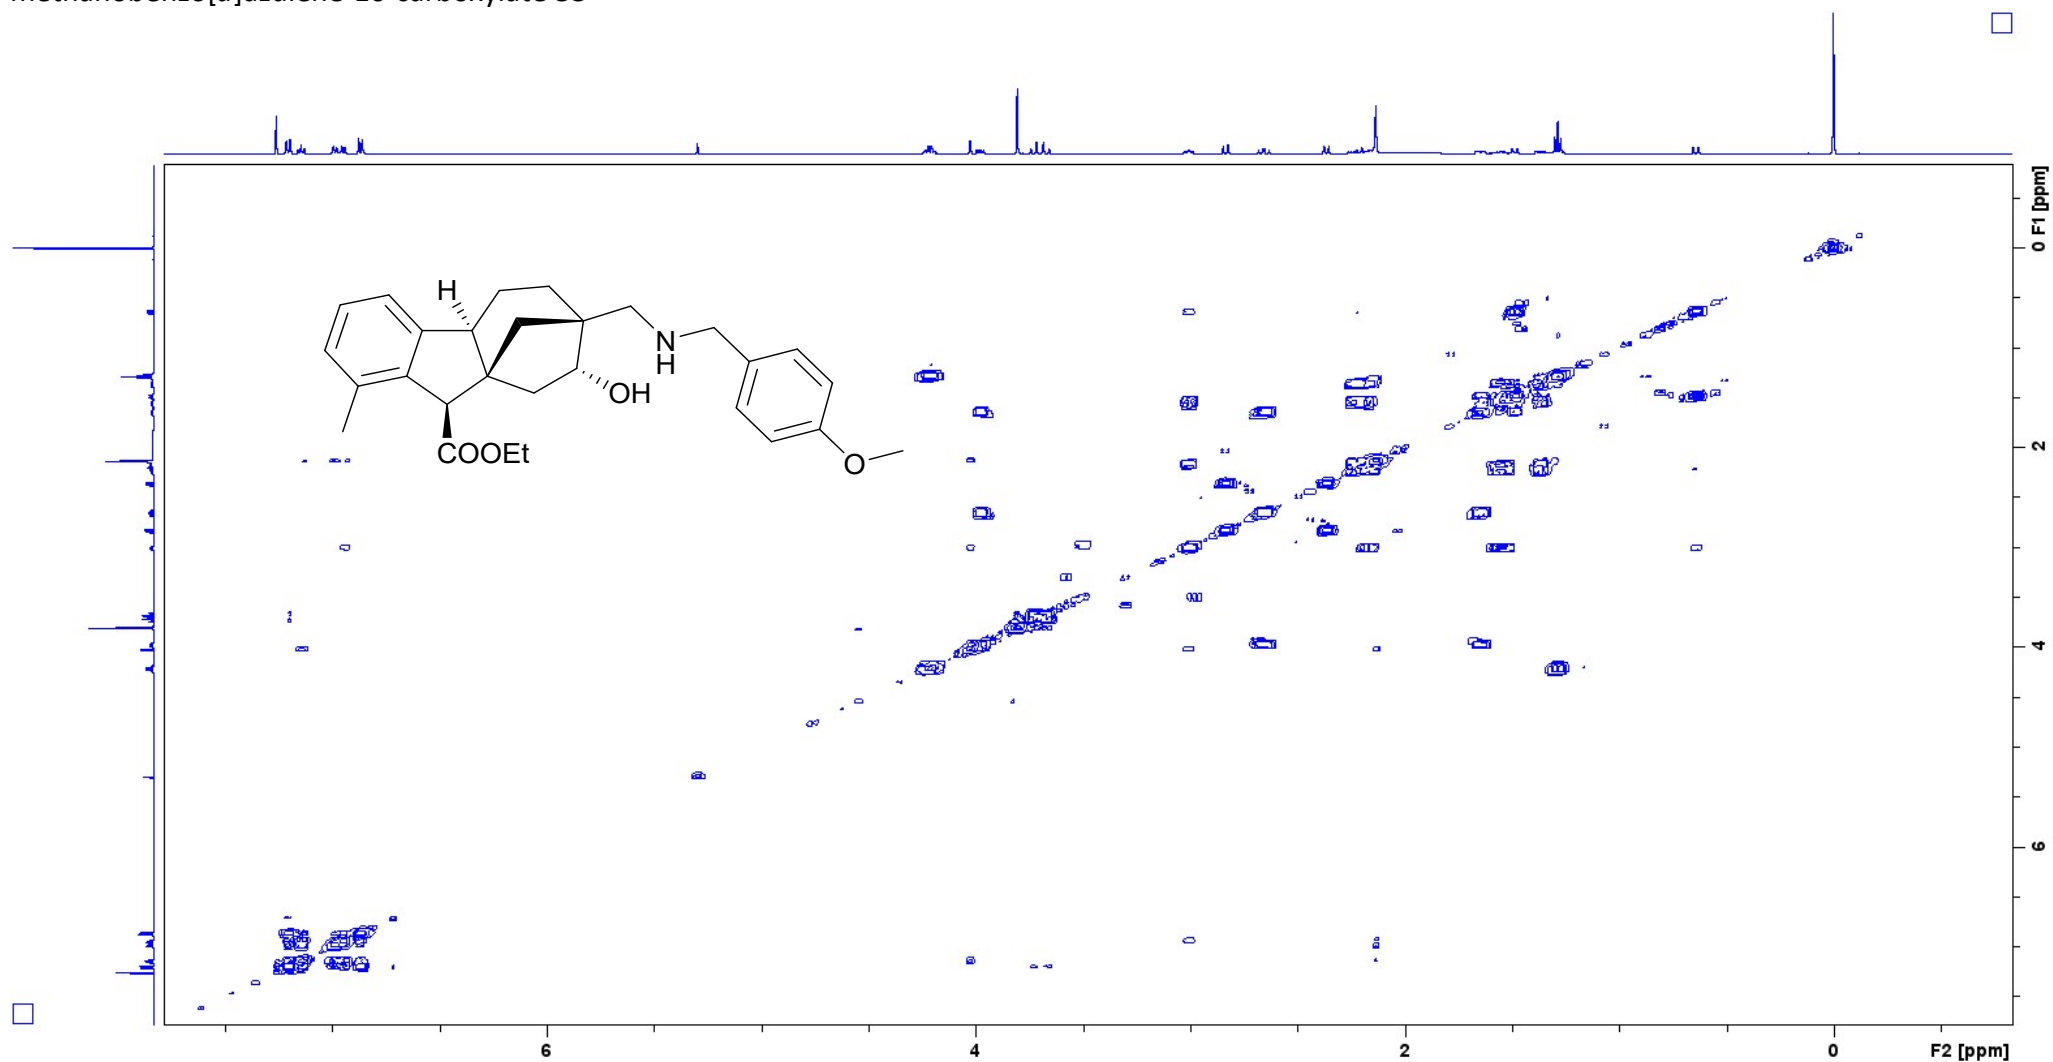

NOESY of ethyl (4*S*,7*S*,8*R*,9*aS*,10*R*)-8-hydroxy-7-(((4-methoxybenzyl)amino)methyl)-1-methyl-4*b*,6,7,8,9,10-hexahydro-5*H*-7,9*a*-methanobenzo[*a*]azulene-10-carboxylate **33**

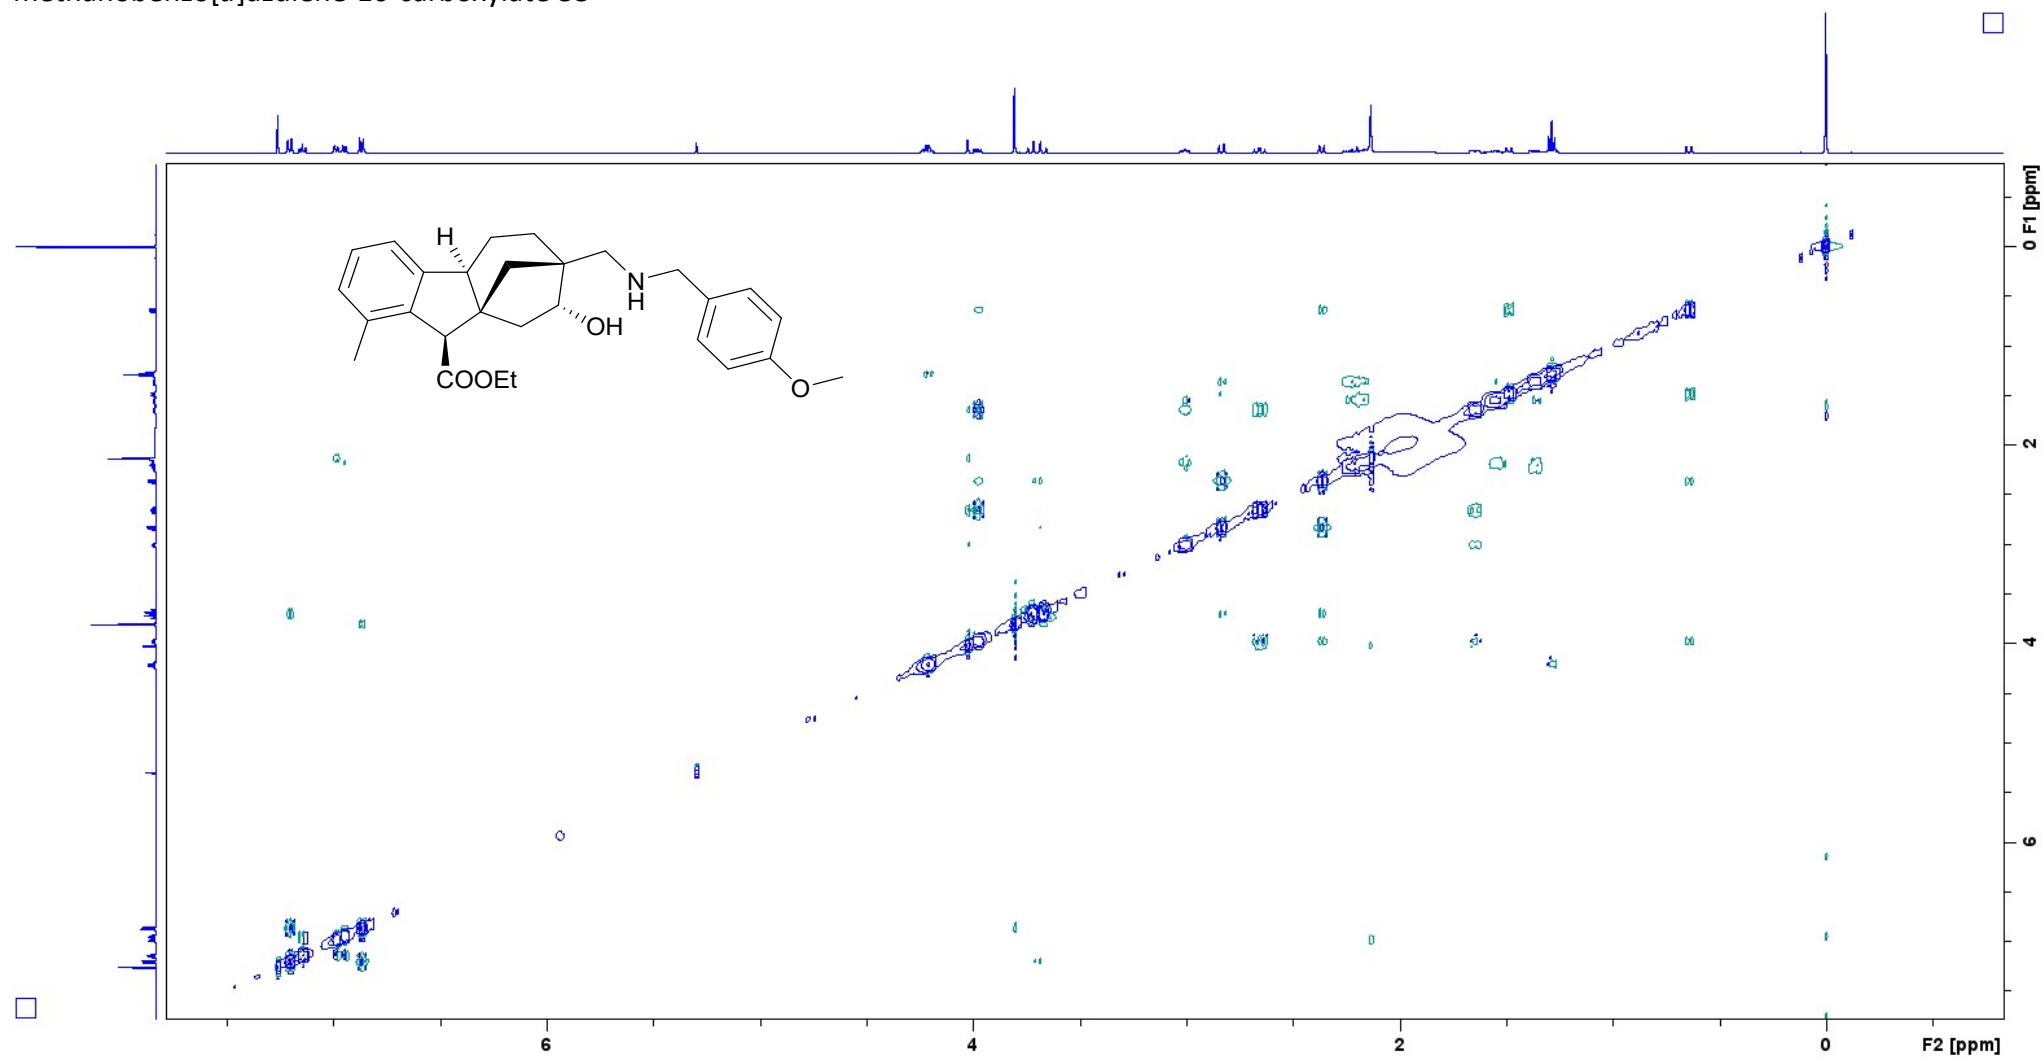



HSQC of ethyl (4*S*,7*S*,8*R*,9*aS*,10*R*)-8-hydroxy-7-(((4-methoxybenzyl)amino)methyl)-1-methyl-4*b*,6,7,8,9,10-hexahydro-5*H*-7,9*a*-methanobenzo[*a*]azulene-10-carboxylate **33**

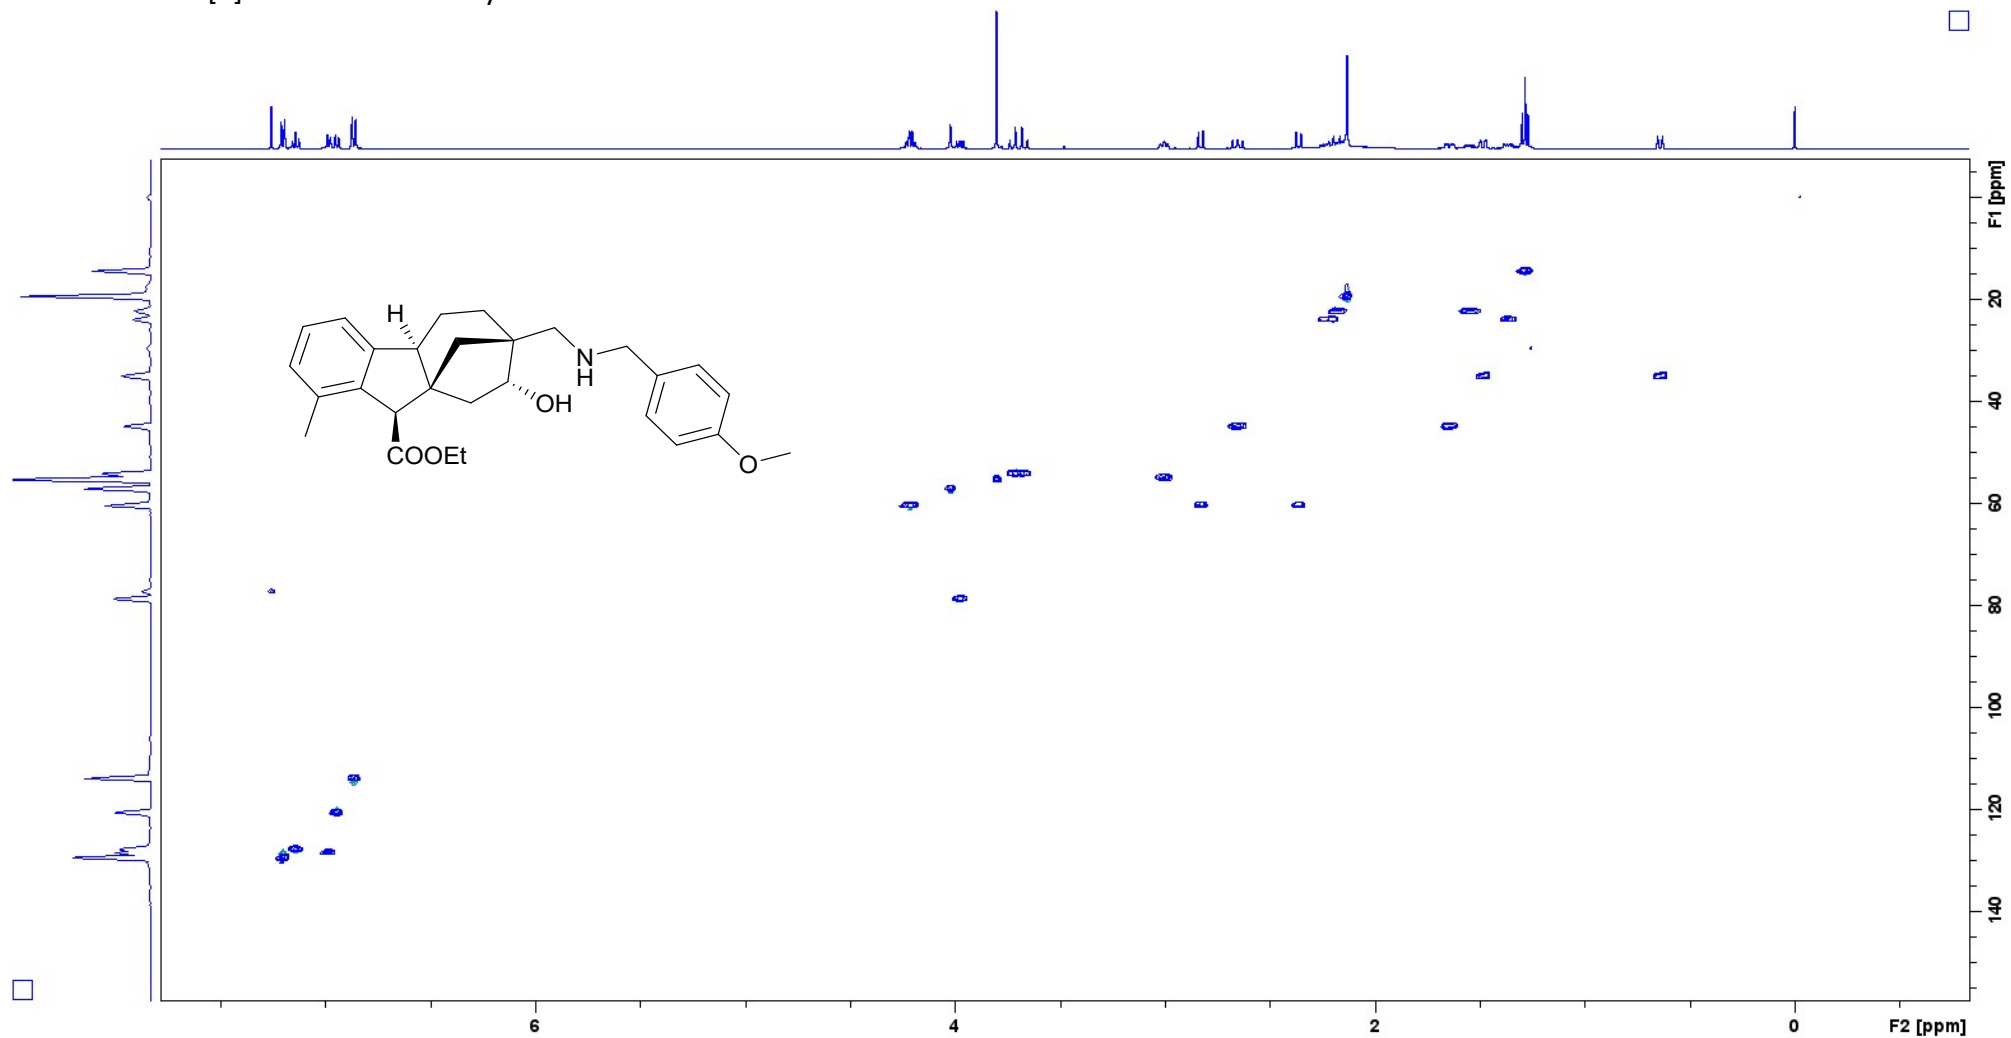

HMBC of ethyl (4*b**S*,7*S*,8*R*,9*a**S*,10*R*)-8-hydroxy-7-(((4-methoxybenzyl)amino)methyl)-1-methyl-4*b*,6,7,8,9,10-hexahydro-5*H*-7,9*a*-methanobenzo[*a*]azulene-10-carboxylate **33**

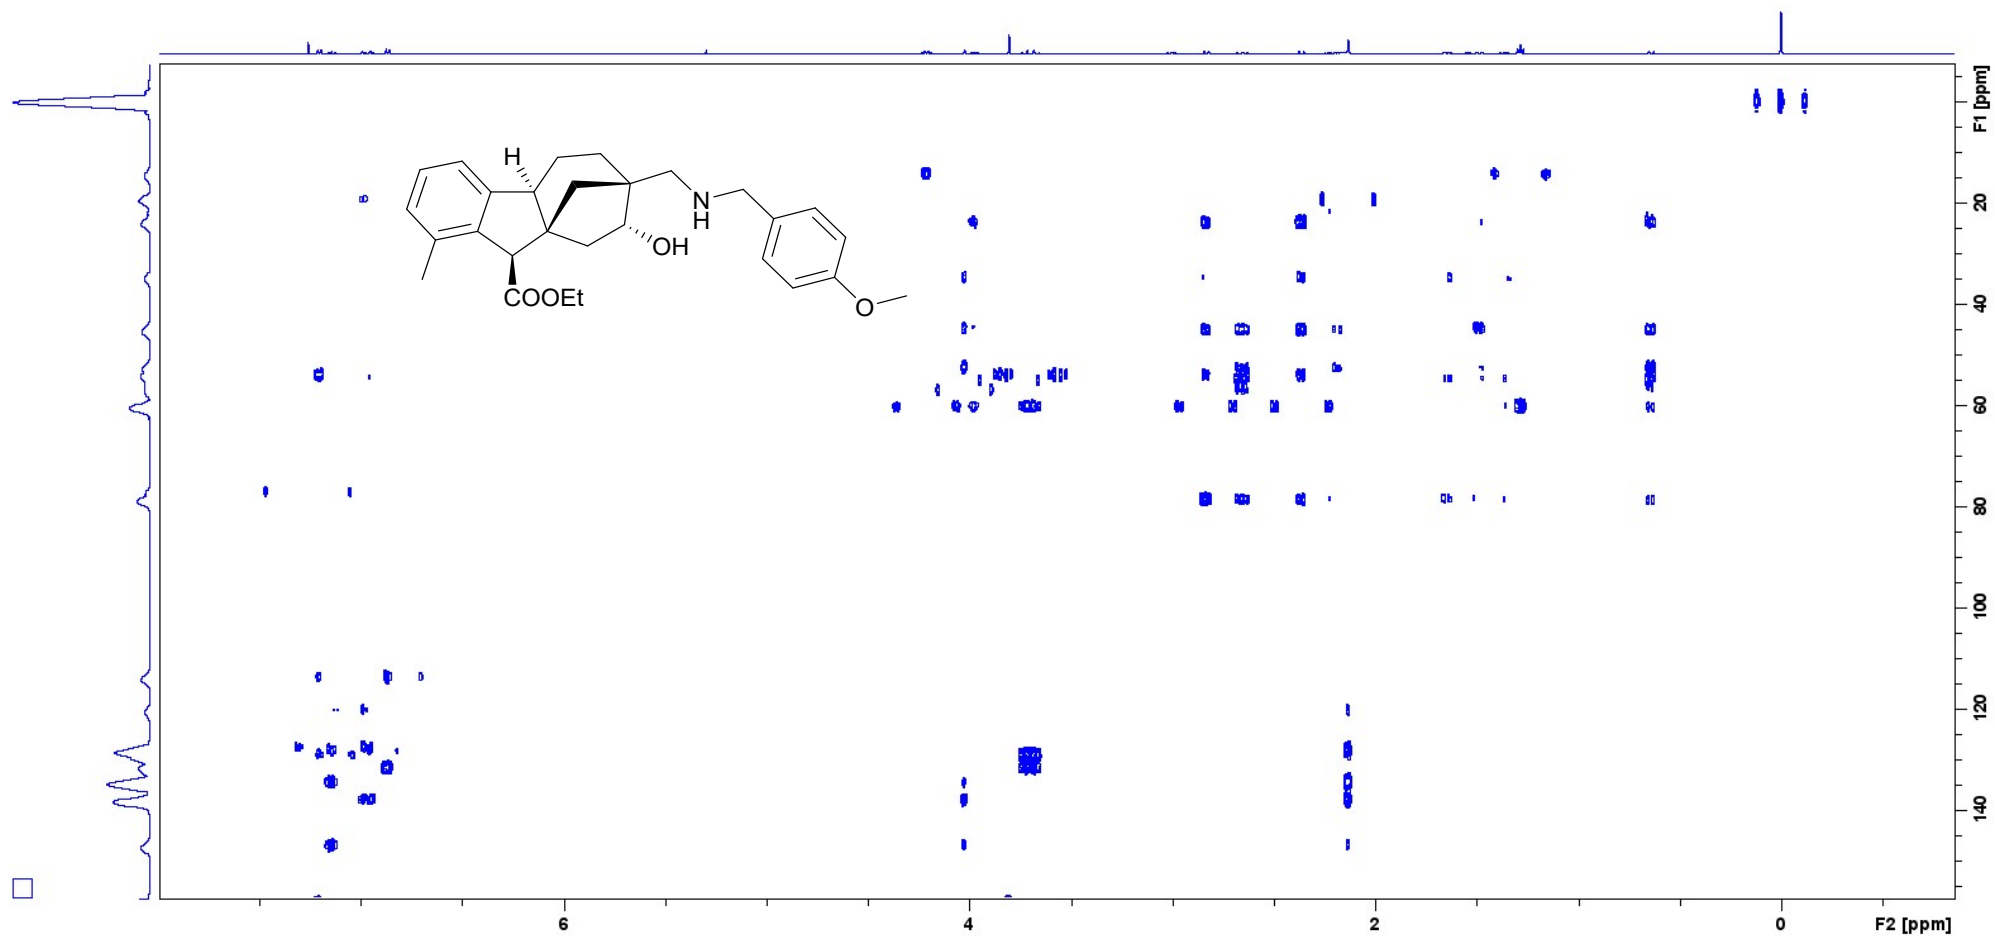

<sup>1</sup>H-NMR of ethyl (4*b**S*,7*S*,8*R*,9*a**S*,10*R*)-7-(((5-bromo-2-hydroxybenzyl)amino)methyl)-8-hydroxy-1-methyl-4*b*,6,7,8,9,10-hexahydro-5*H*-7,9*a*-methanobenzo[*a*]azulene-10-carboxylate **34**

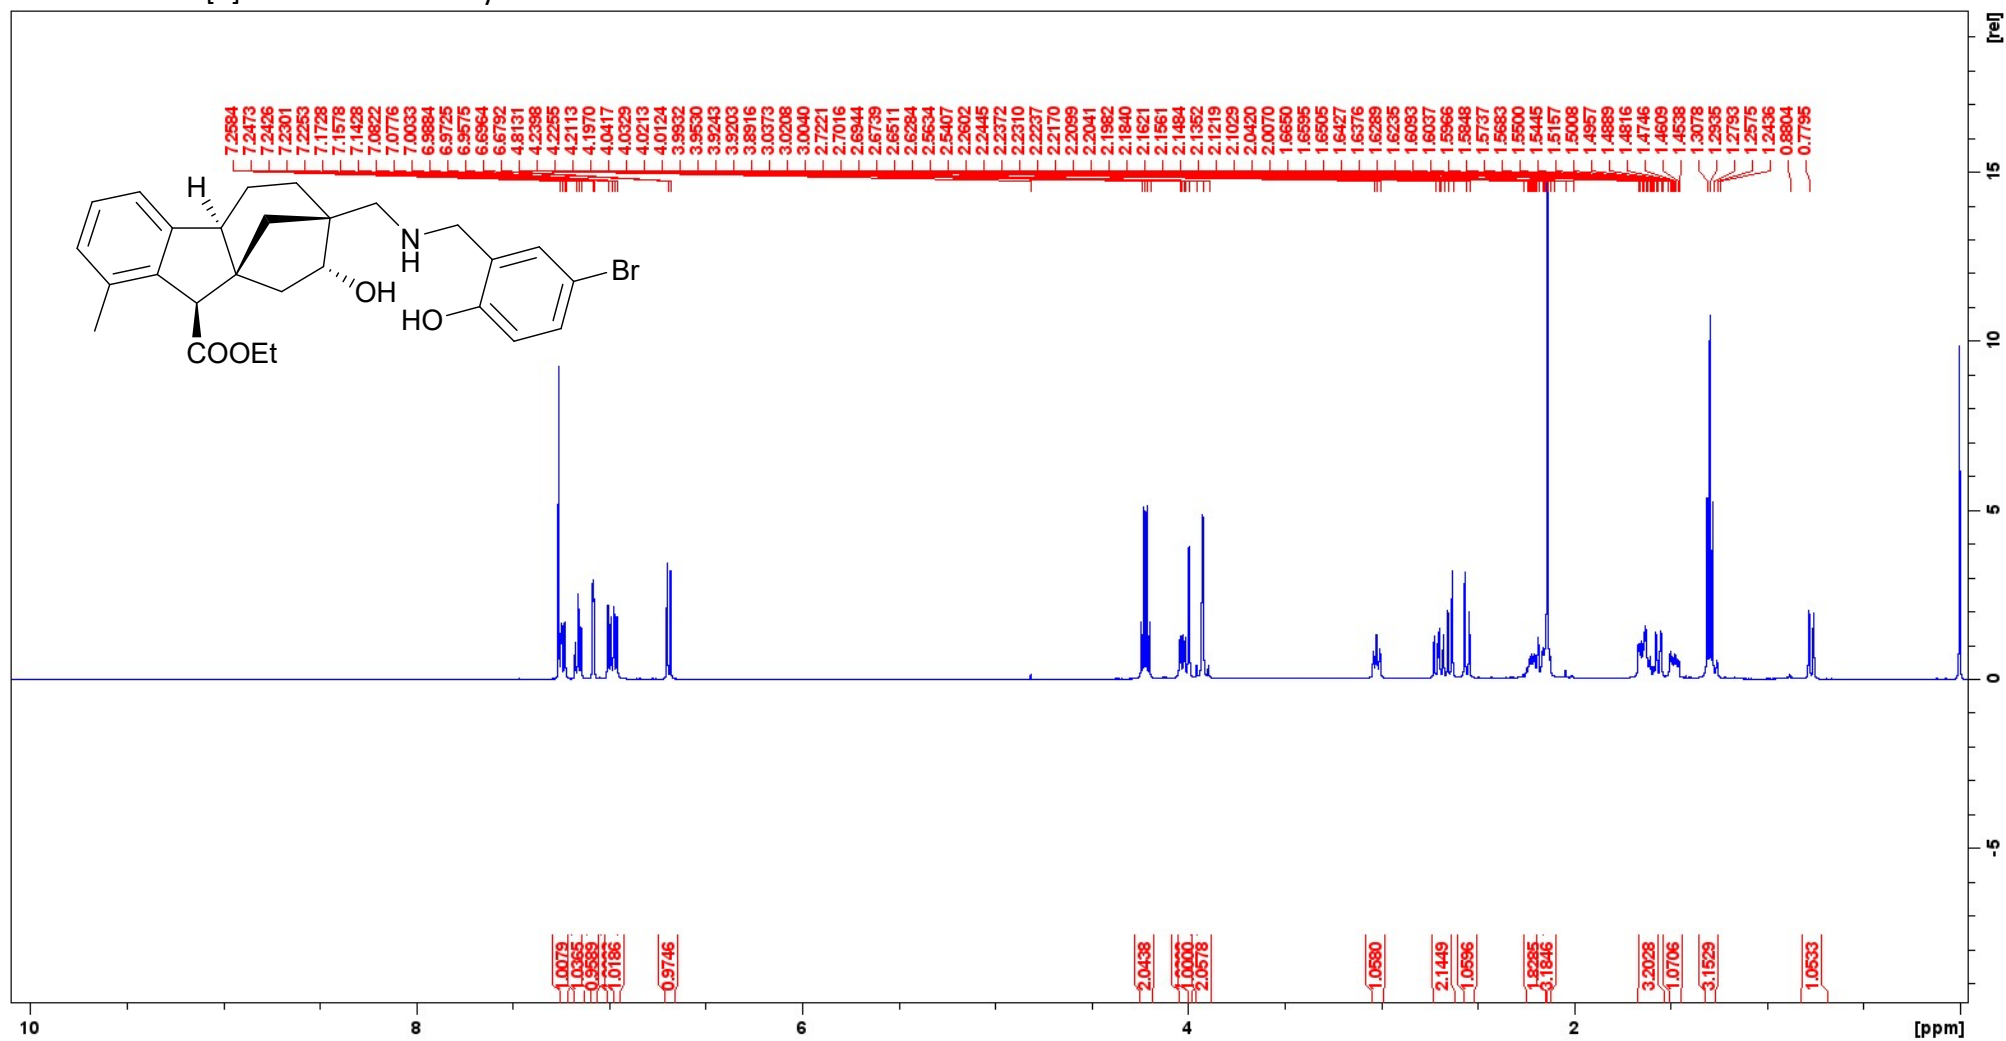

$^{13}\text{C}$ -NMR of ethyl (4*bS*,7*S*,8*R*,9*aS*,10*R*)-7-(((5-bromo-2-hydroxybenzyl)amino)methyl)-8-hydroxy-1-methyl-4*b*,6,7,8,9,10-hexahydro-5*H*-7,9*a*-methanobenzo[*a*]azulene-10-carboxylate **34**

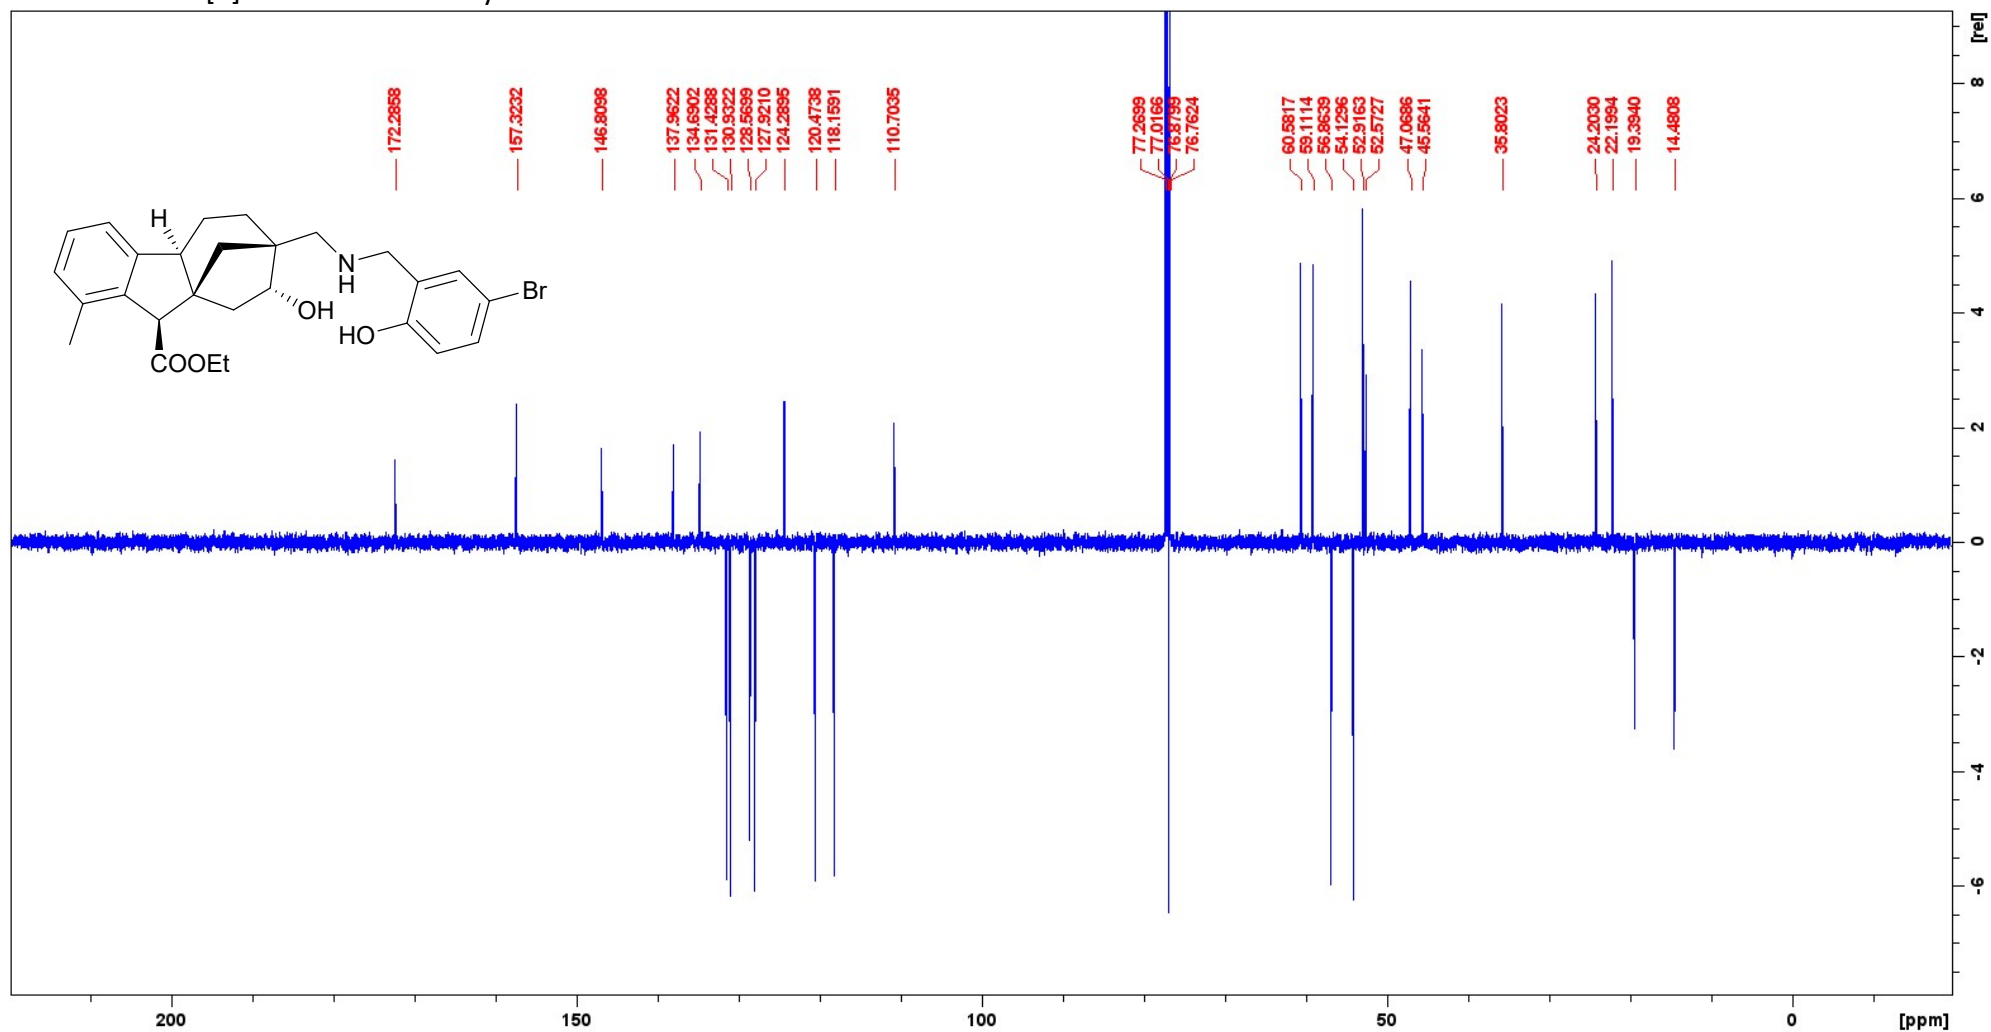

COSY of ethyl (4*S*,7*S*,8*R*,9*aS*,10*R*)-7-(((5-bromo-2-hydroxybenzyl)amino)methyl)-8-hydroxy-1-methyl-4*b*,6,7,8,9,10-hexahydro-5*H*-7,9*a*-methanobenzo[*a*]azulene-10-carboxylate **34**

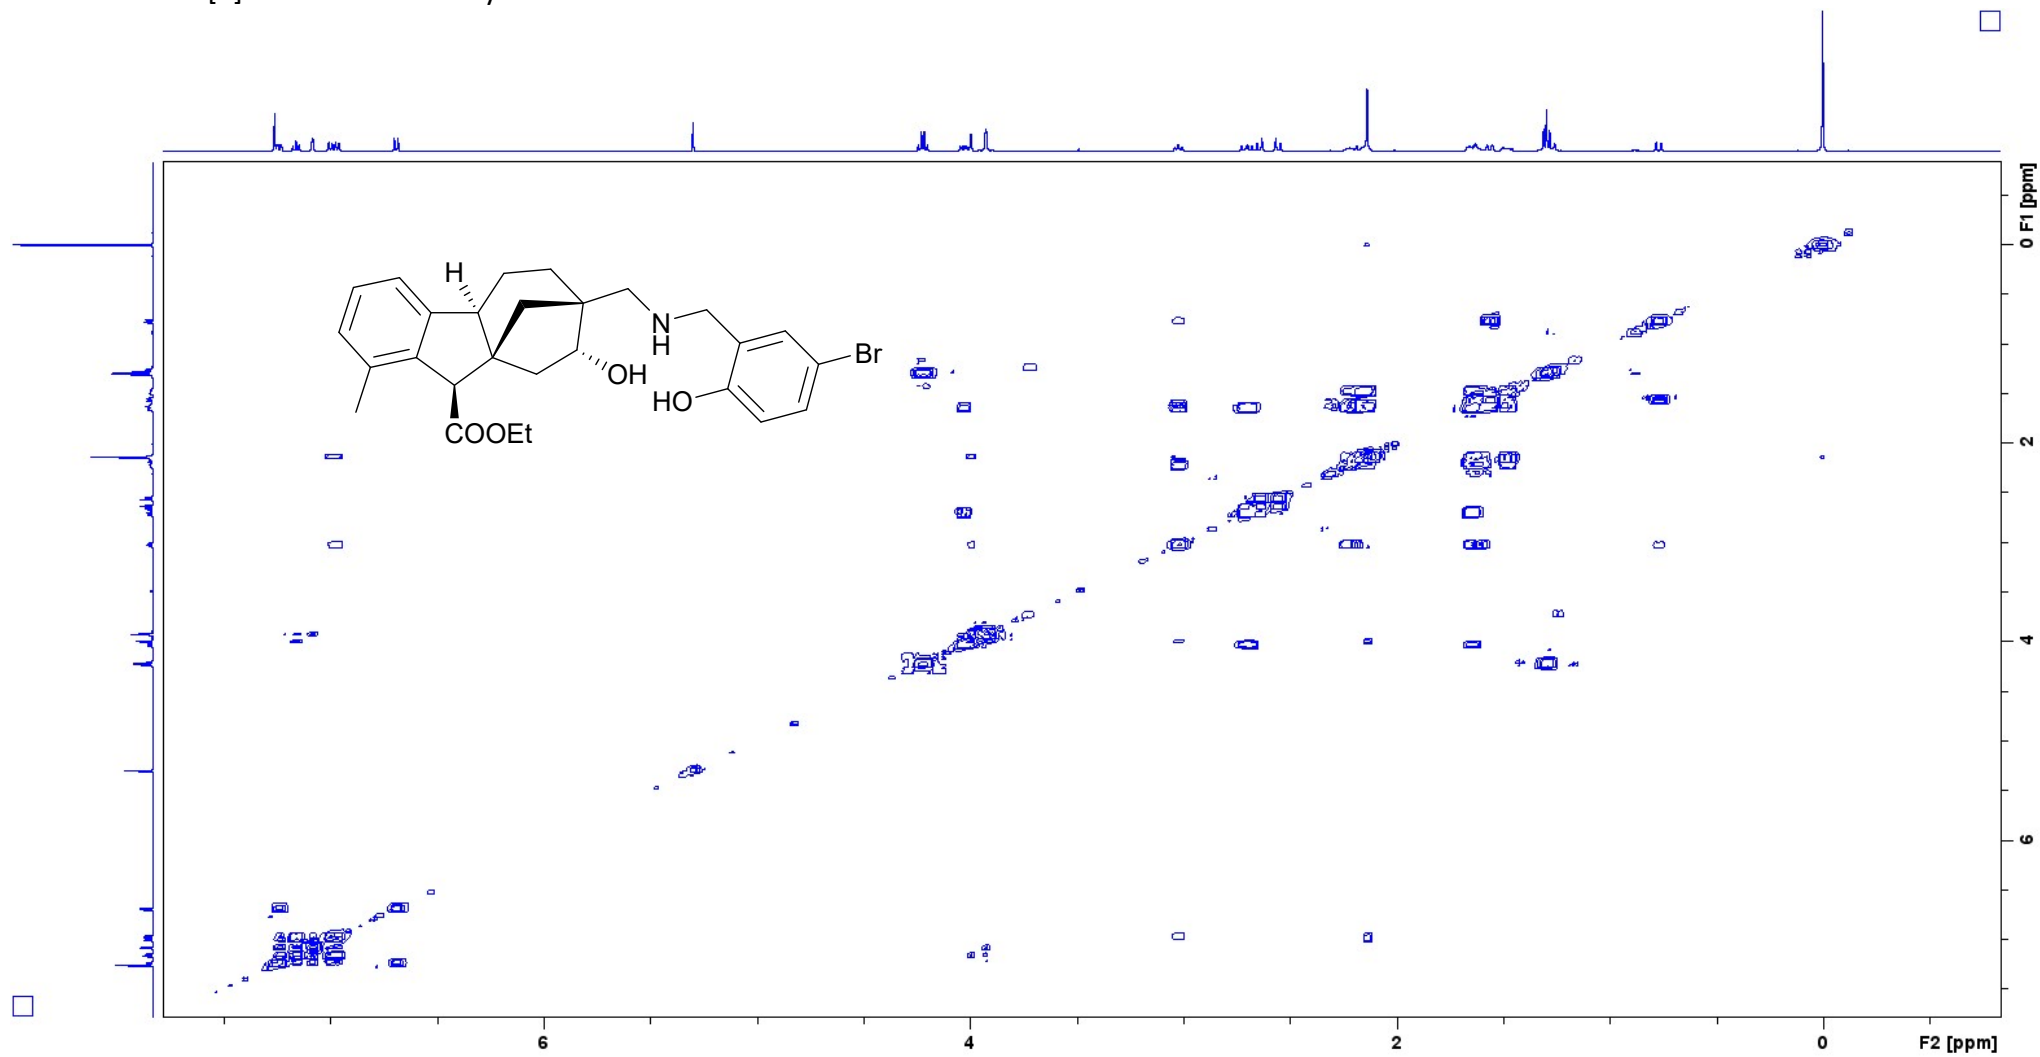

NOESY of ethyl (4*b**S*,7*S*,8*R*,9*a**S*,10*R*)-7-(((5-bromo-2-hydroxybenzyl)amino)methyl)-8-hydroxy-1-methyl-4*b*,6,7,8,9,10-hexahydro-5*H*-7,9a-methanobenzo[*a*]azulene-10-carboxylate **34**

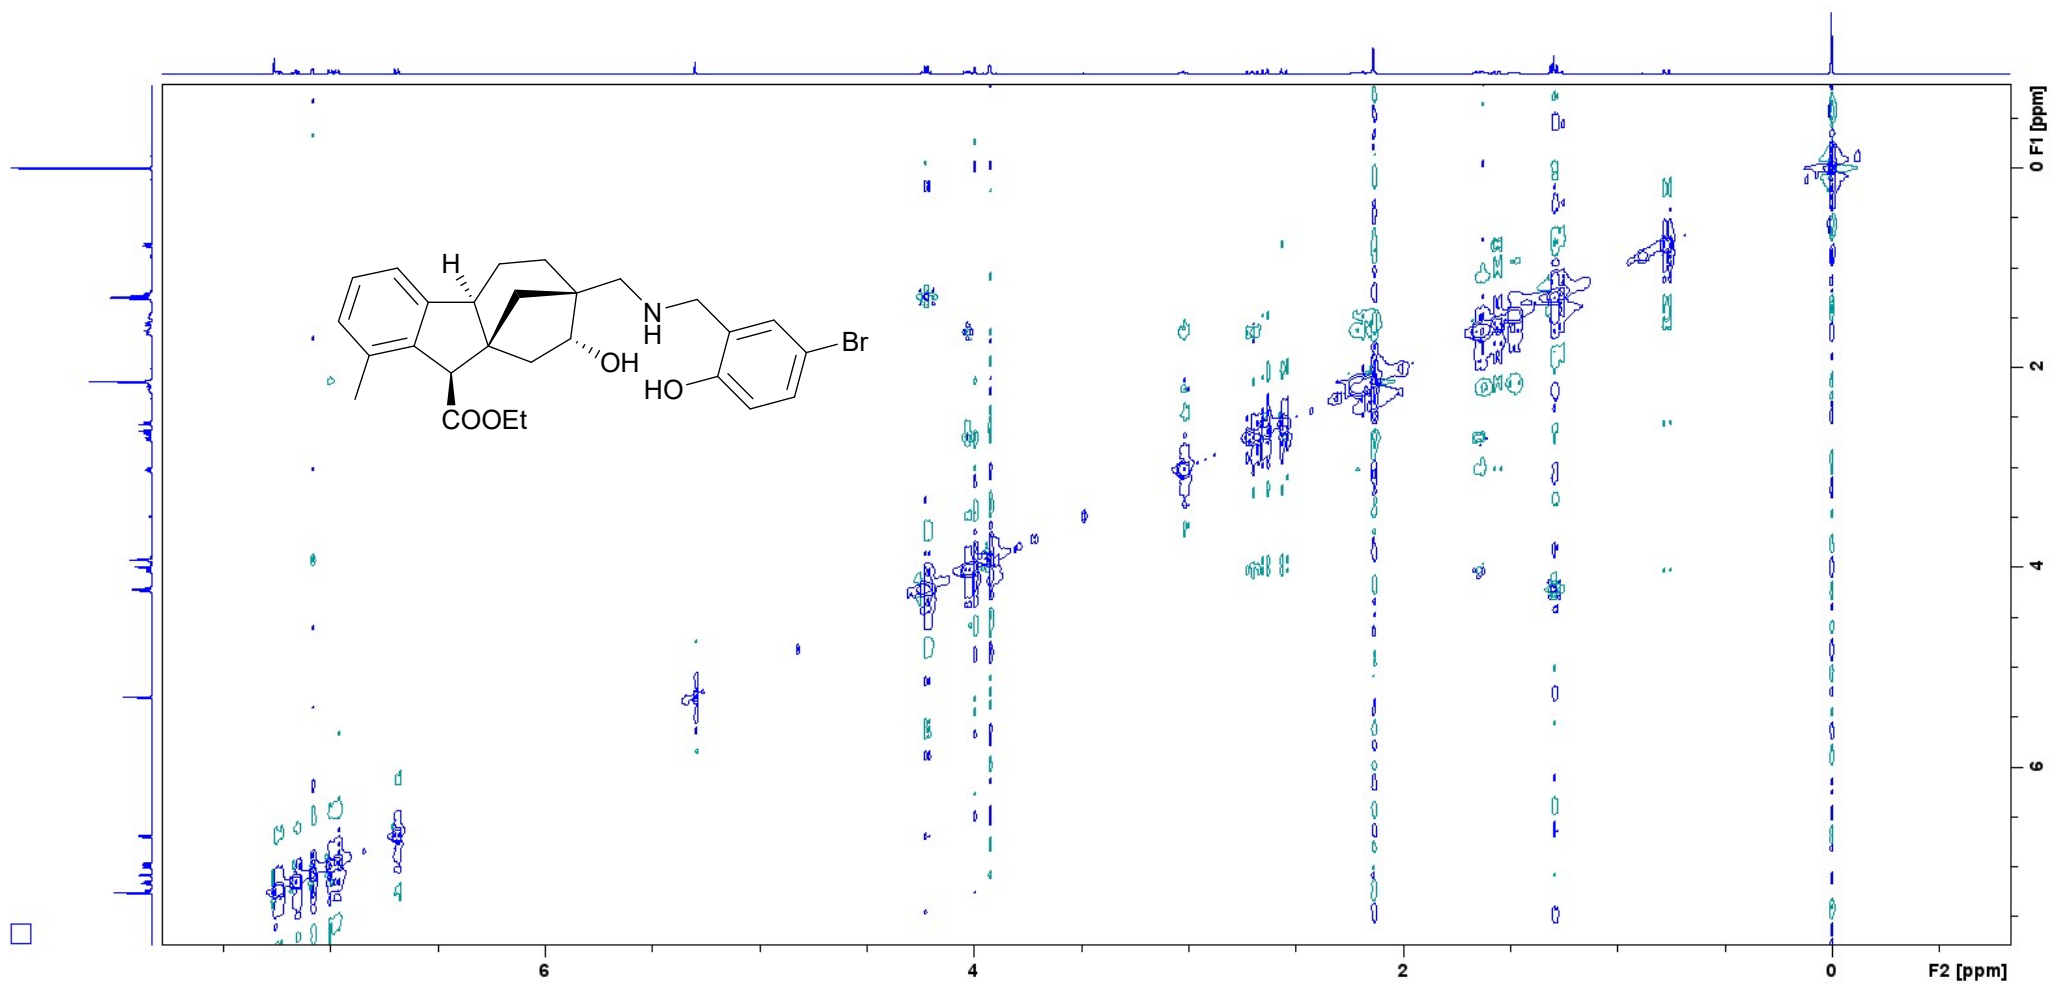

HSQC of ethyl (4*b**S*,7*S*,8*R*,9*a**S*,10*R*)-7-(((5-bromo-2-hydroxybenzyl)amino)methyl)-8-hydroxy-1-methyl-4*b*,6,7,8,9,10-hexahydro-5*H*-7,9*a*-methanobenzo[*a*]azulene-10-carboxylate **34**

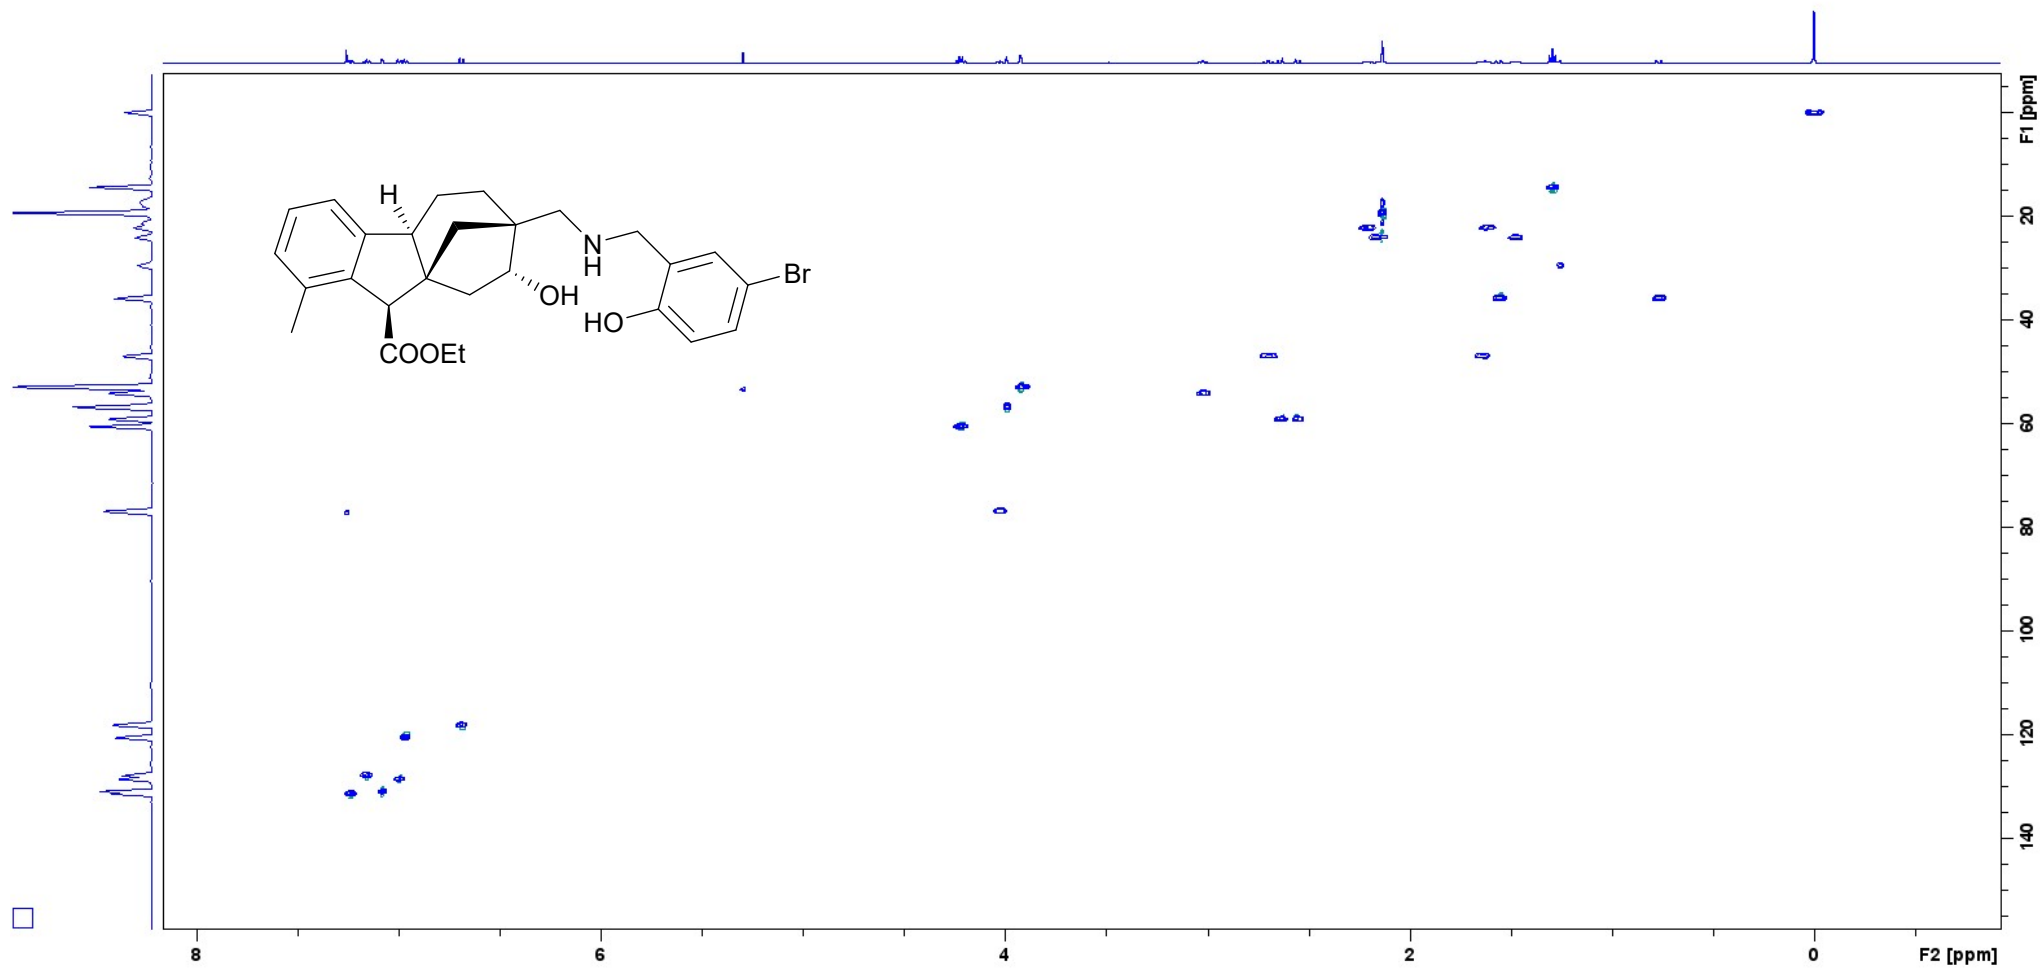

HMBC of ethyl (4*S*,7*S*,8*R*,9*aS*,10*R*)-7-(((5-bromo-2-hydroxybenzyl)amino)methyl)-8-hydroxy-1-methyl-4*b*,6,7,8,9,10-hexahydro-5*H*-7,9*a*-methanobenzo[*a*]azulene-10-carboxylate **34**

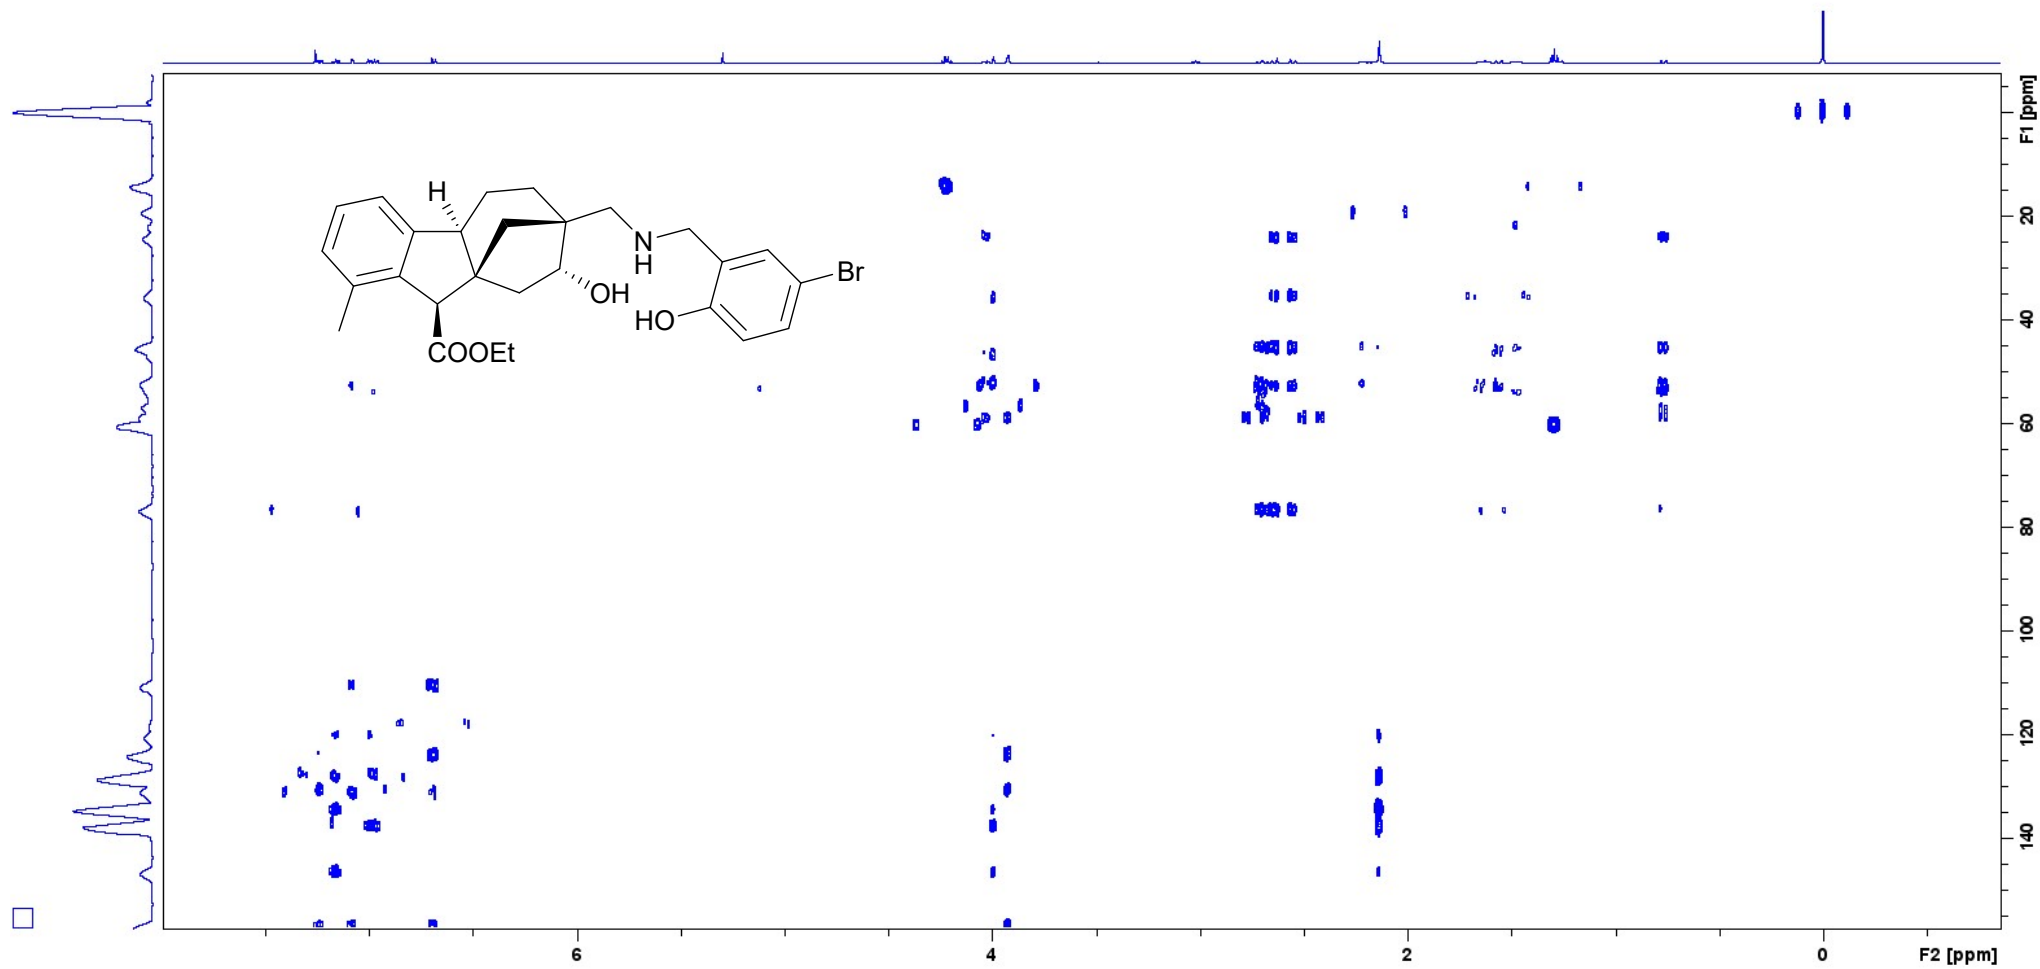



<sup>1</sup>H-NMR of ethyl (4*bS*,7*S*,8*R*,9*aS*,10*R*)-8-hydroxy-1-methyl-7-(((quinolin-2-ylmethyl)amino)methyl)-4*b*,6,7,8,9,10-hexahydro-5*H*-7,9*a*-methanobenzo[*a*]azulene-10-carboxylate **35**

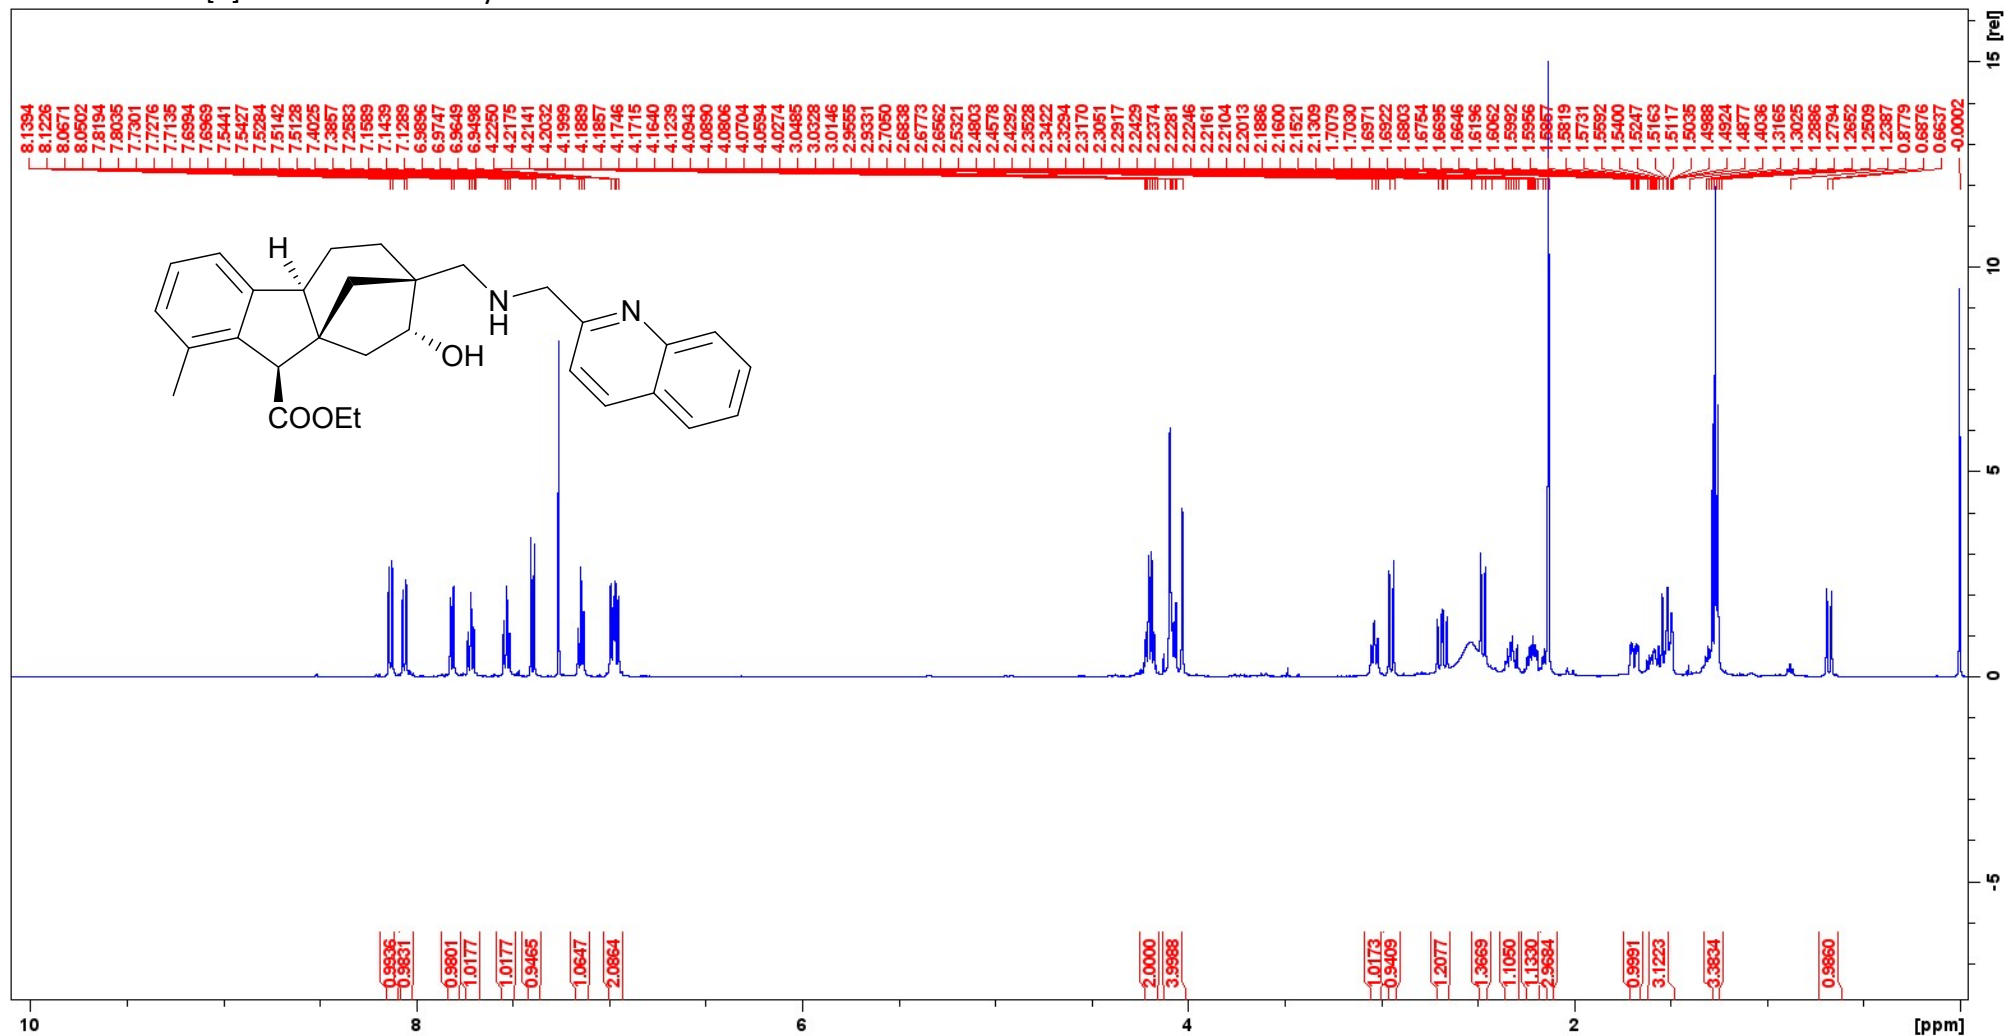

<sup>13</sup>C-NMR of ethyl (4*b**S*,7*S*,8*R*,9*a**S*,10*R*)-8-hydroxy-1-methyl-7-(((quinolin-2-ylmethyl)amino)methyl)-4*b*,6,7,8,9,10-hexahydro-5*H*-7,9*a*-methanobenzo[*a*]azulene-10-carboxylate **35**

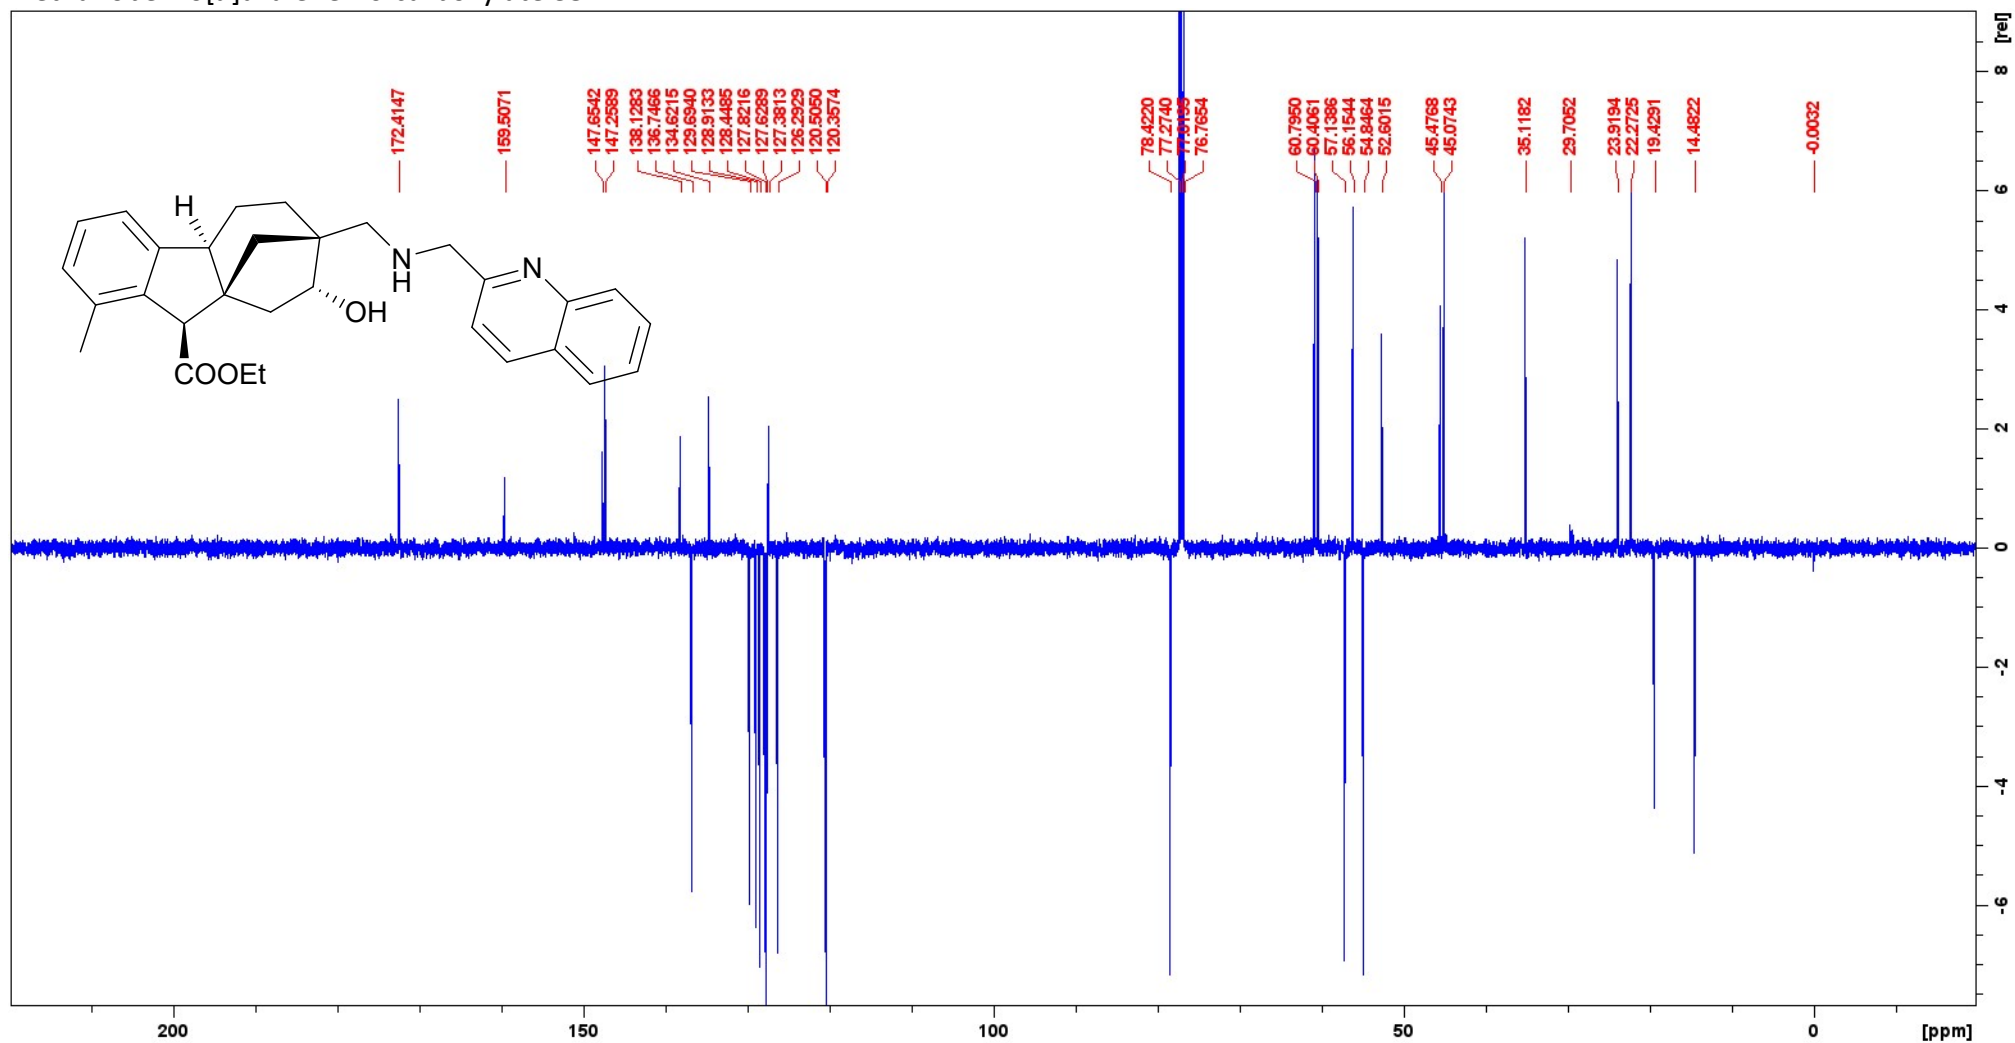

HSQC of ethyl (4*bS*,7*S*,8*R*,9*aS*,10*R*)-8-hydroxy-1-methyl-7-(((quinolin-2-ylmethyl)amino)methyl)-4*b*,6,7,8,9,10-hexahydro-5*H*-7,9*a*-methanobenzo[*a*]azulene-10-carboxylate **35**

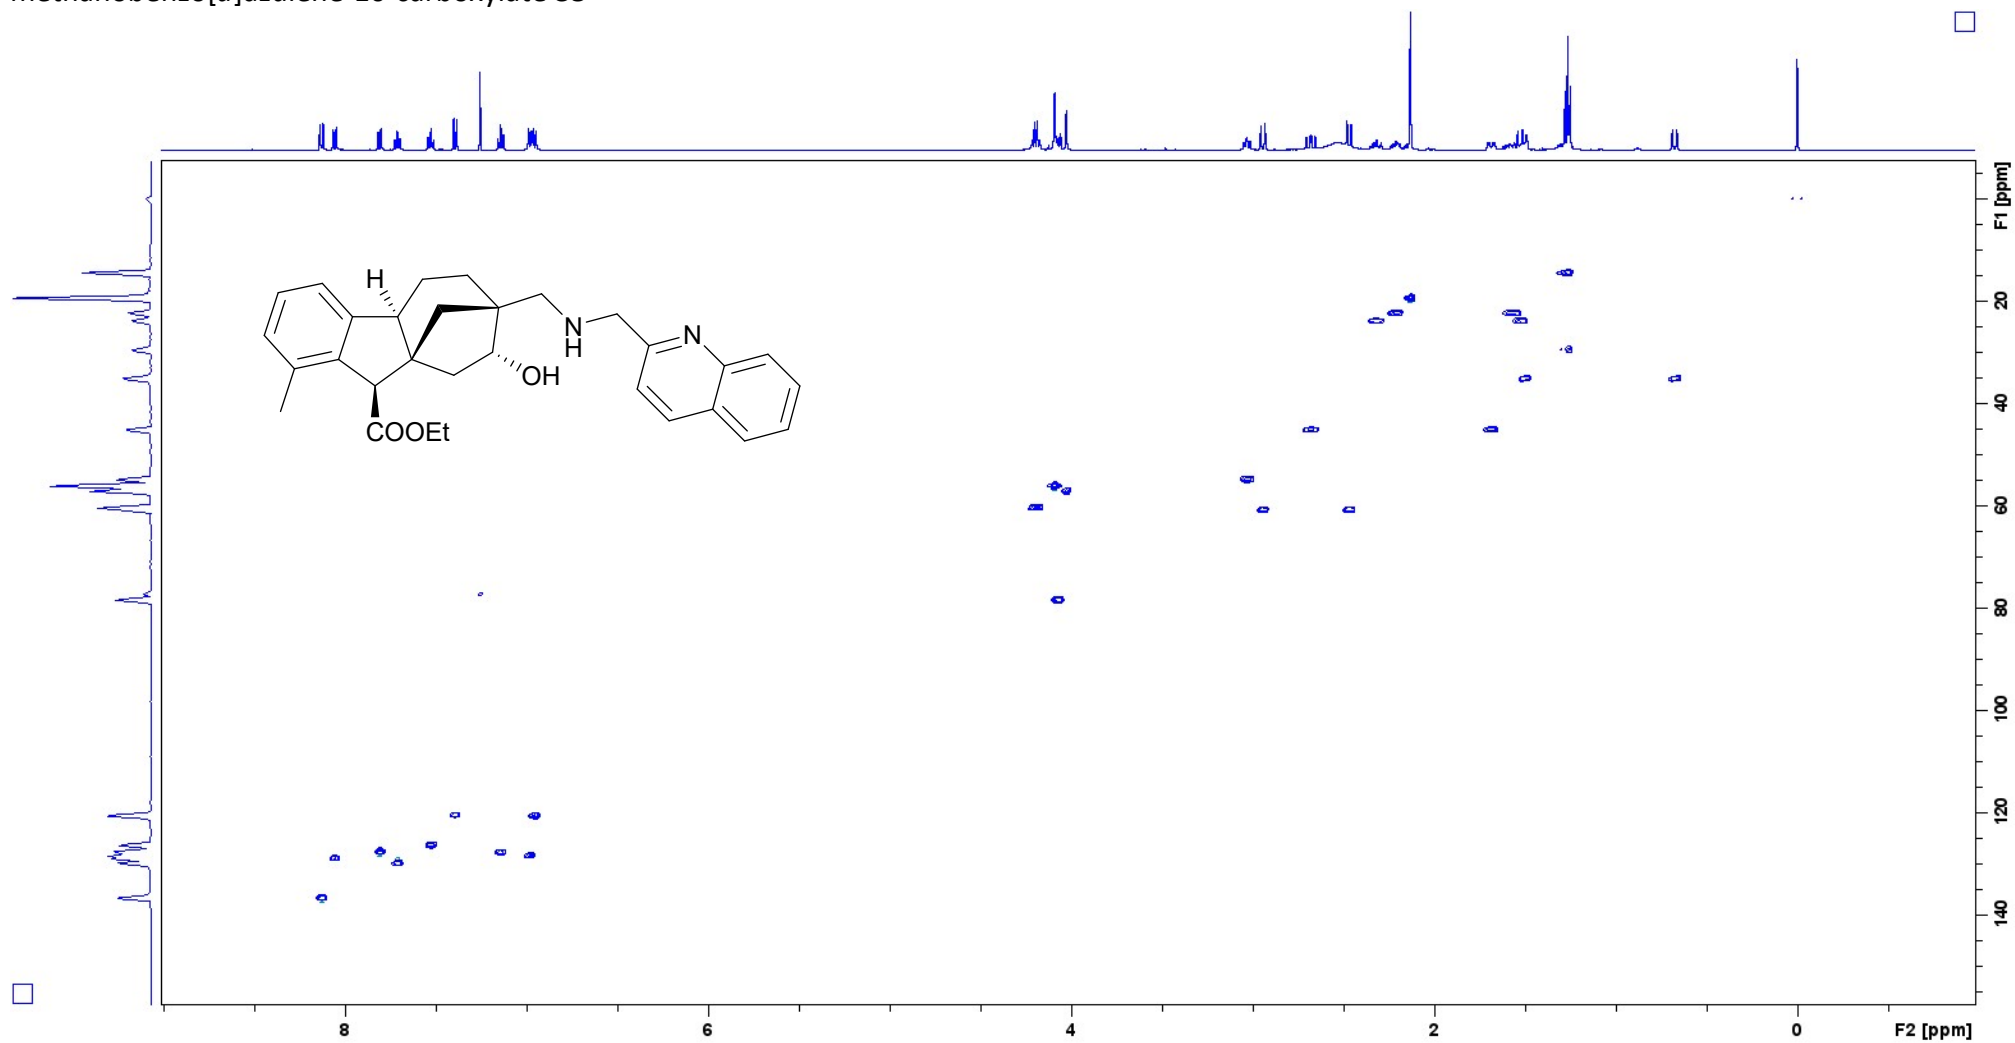

<sup>1</sup>H-NMR of ethyl (4*b*S,7*S*,8*R*,9*a*S,10*R*)-8-hydroxy-1-methyl-7-(((quinolin-4-ylmethyl)amino)methyl)-4*b*,6,7,8,9,10-hexahydro-5*H*-7,9*a*-methanobenzo[*a*]azulene-10-carboxylate **36**

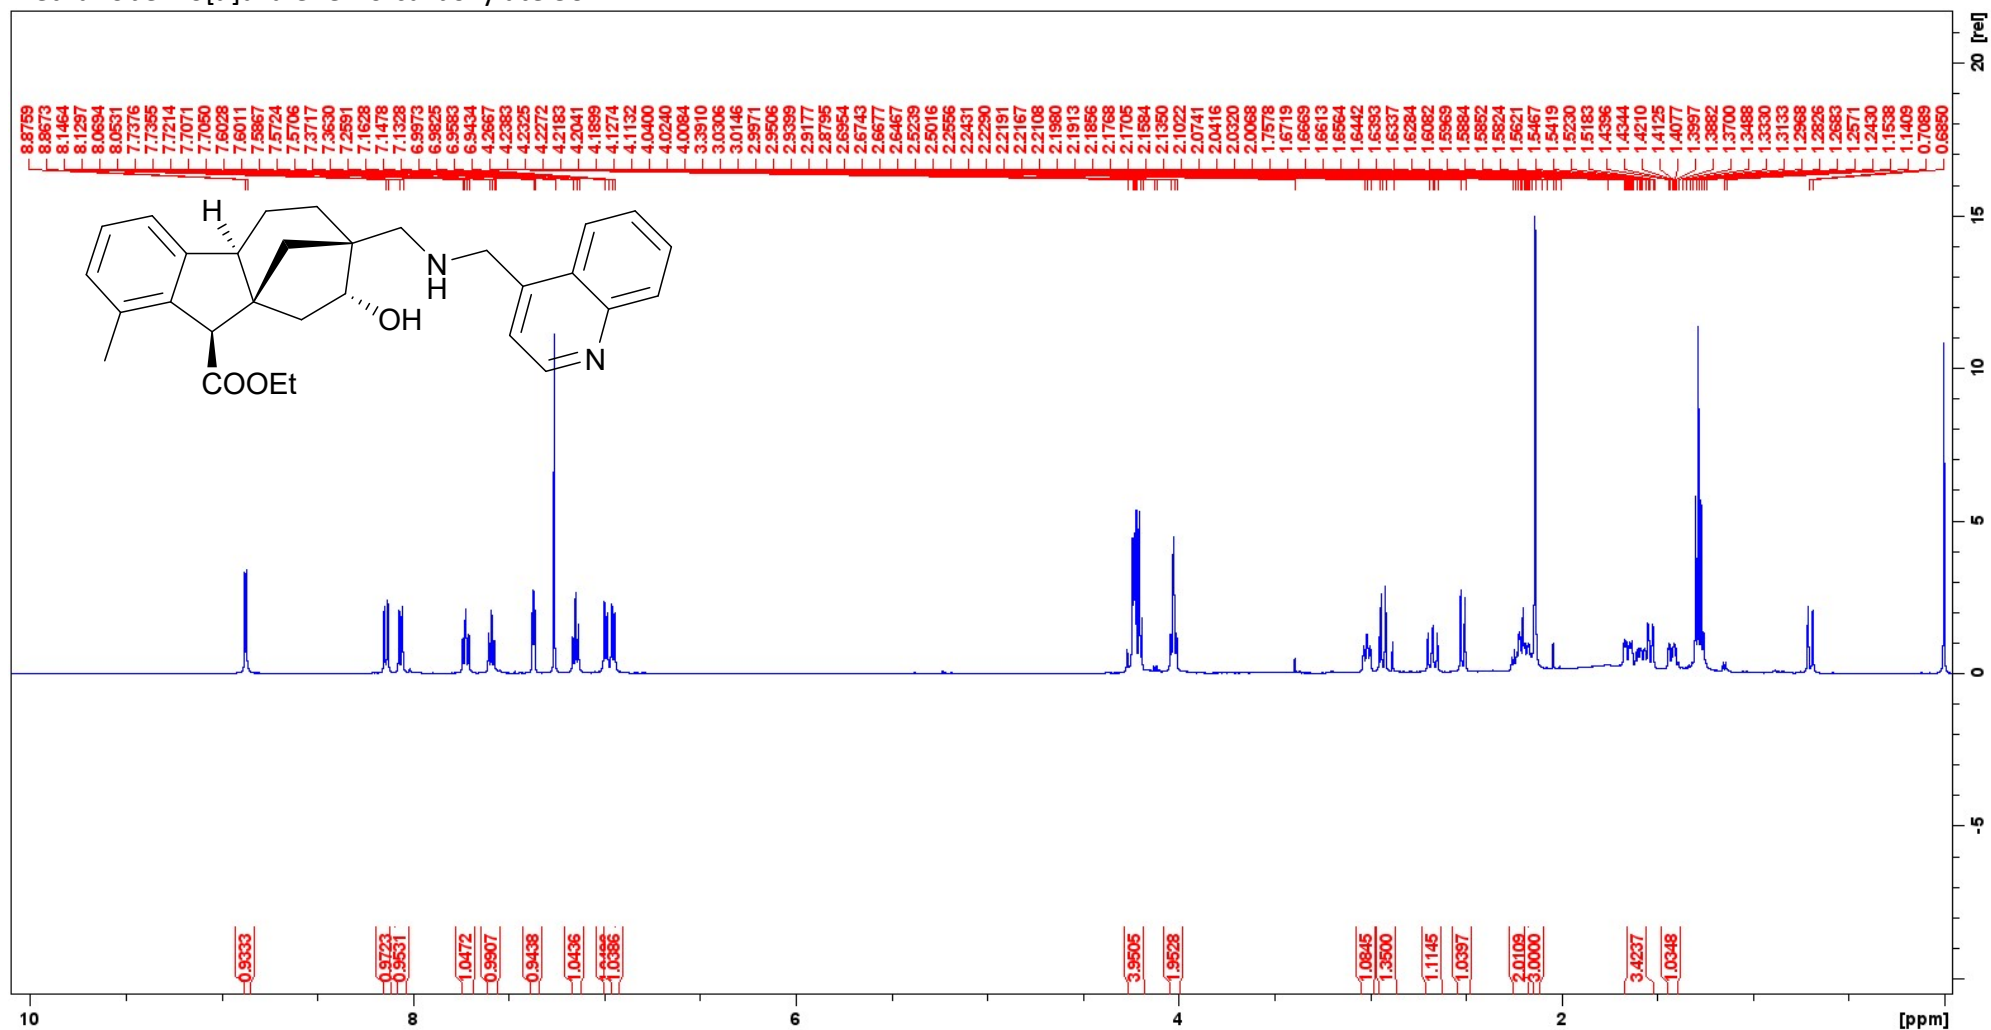

$^{13}\text{C}$ -NMR of ethyl (4*S*,7*S*,8*R*,9*aS*,10*R*)-8-hydroxy-1-methyl-7-(((quinolin-4-ylmethyl)amino)methyl)-4*b*,6,7,8,9,10-hexahydro-5*H*-7,9*a*-methanobenzo[*a*]azulene-10-carboxylate **36**

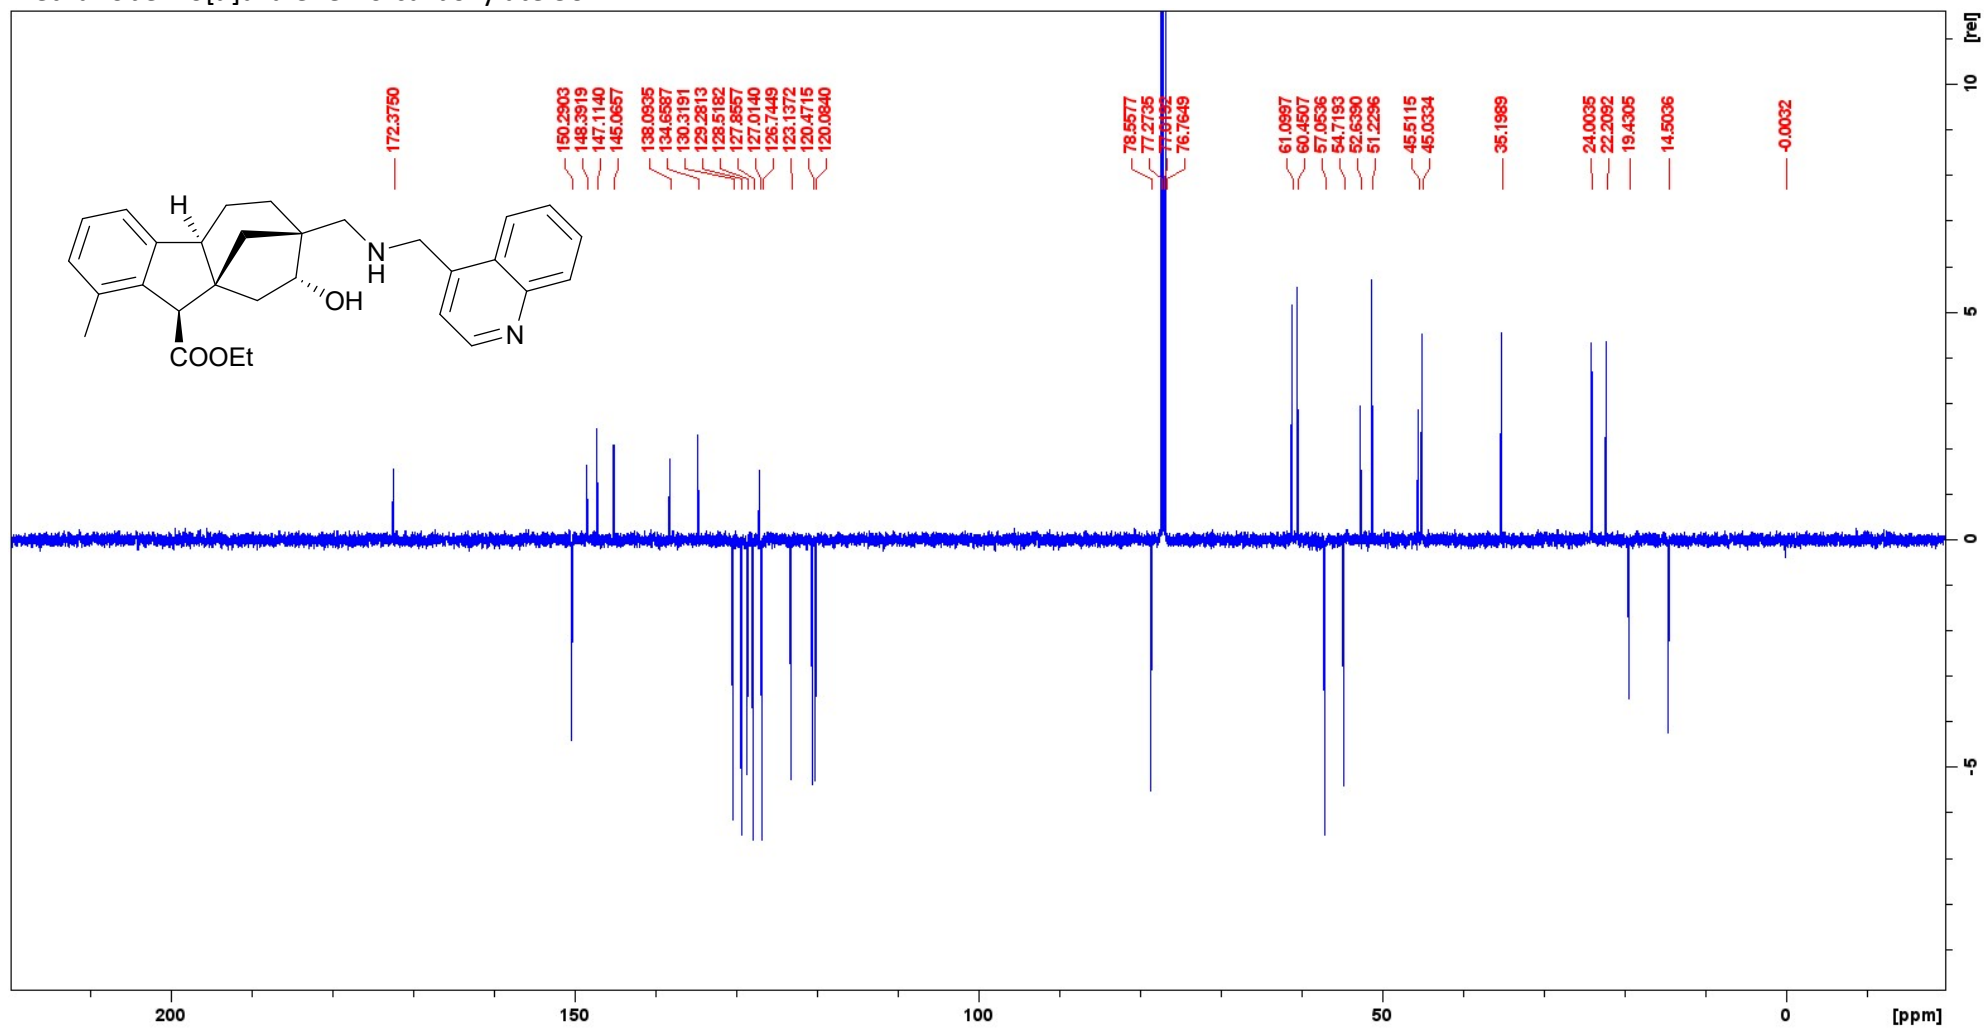



<sup>1</sup>H-NMR of ethyl (4*bS*,7*S*,8*R*,9*aS*,10*R*)-8-hydroxy-1-methyl-7-(((pyridin-4-ylmethyl)amino)methyl)-4*b*,6,7,8,9,10-hexahydro-5*H*-7,9*a*-methanobenzo[*a*]azulene-10-carboxylate **37**

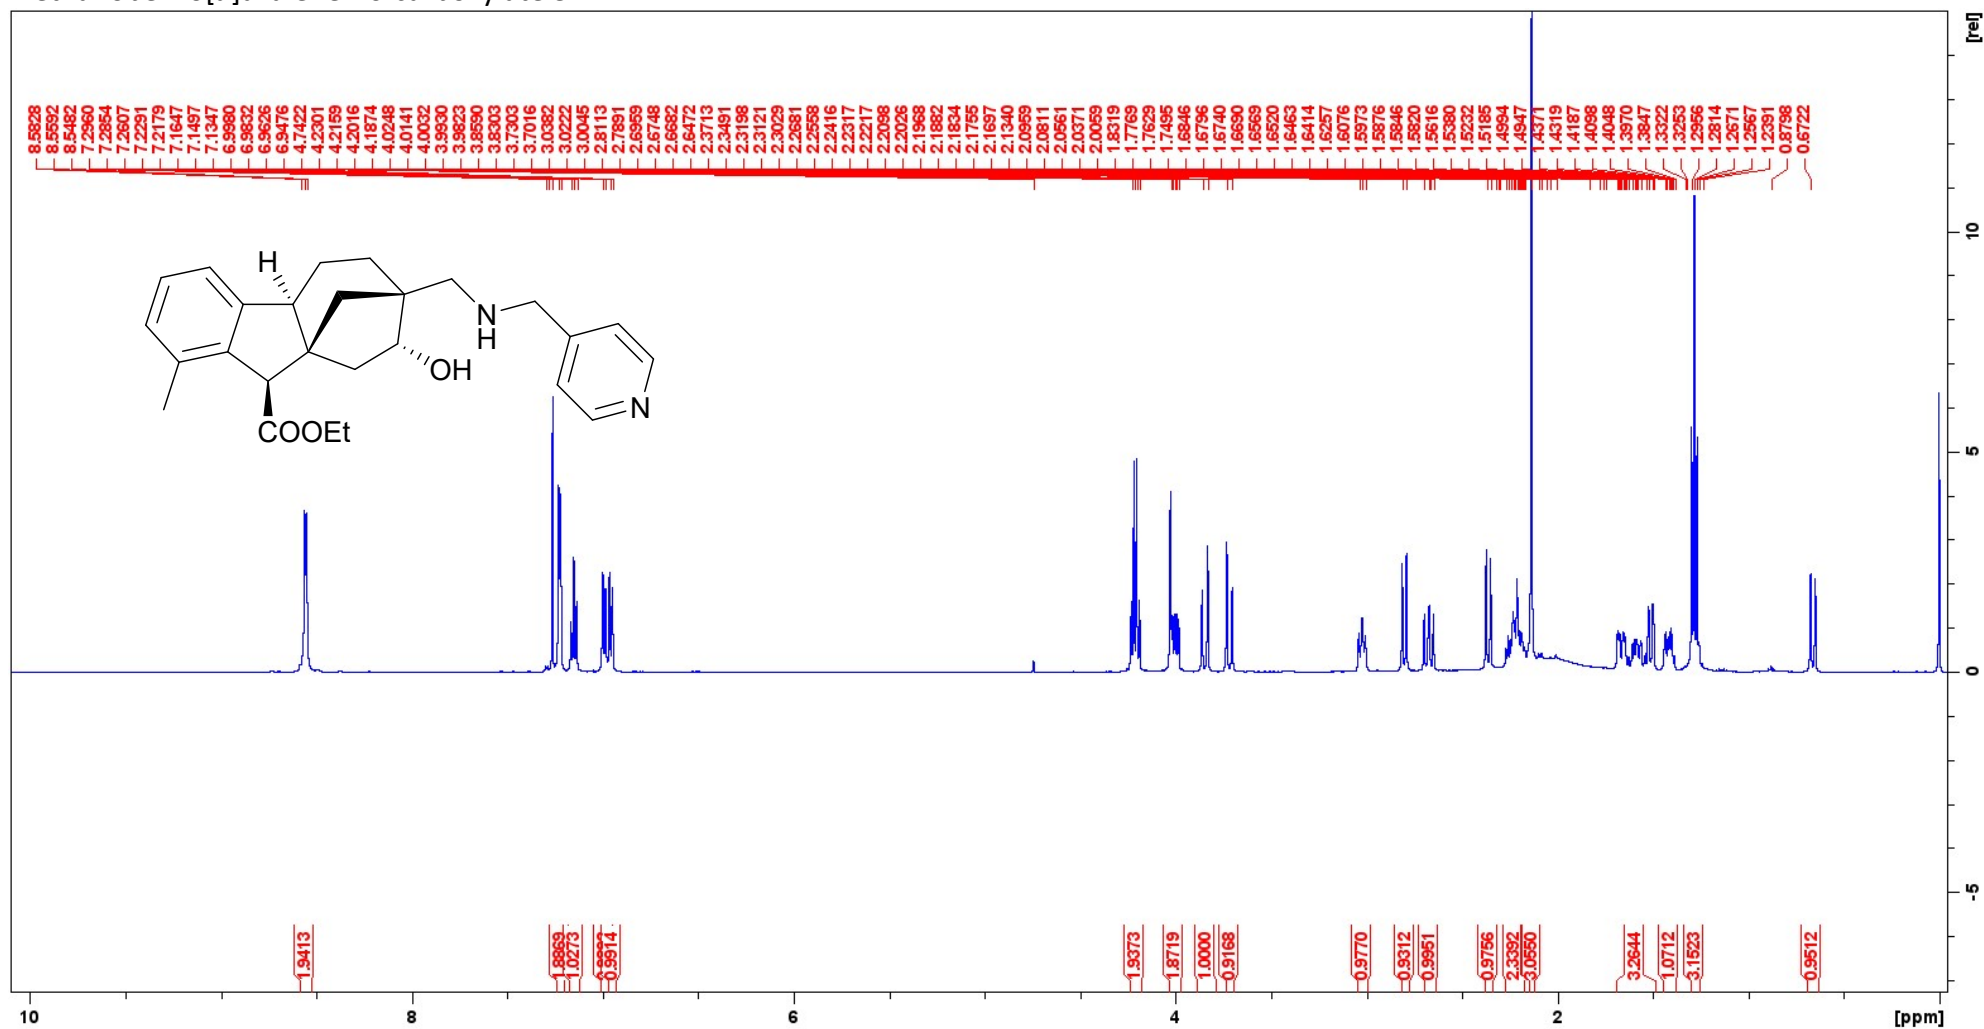

<sup>13</sup>C-NMR of ethyl (4*S*,7*S*,8*R*,9*aS*,10*R*)-8-hydroxy-1-methyl-7-(((pyridin-4-ylmethyl)amino)methyl)-4*b*,6,7,8,9,10-hexahydro-5*H*-7,9*a*-methanobenzo[*a*]azulene-10-carboxylate **37**

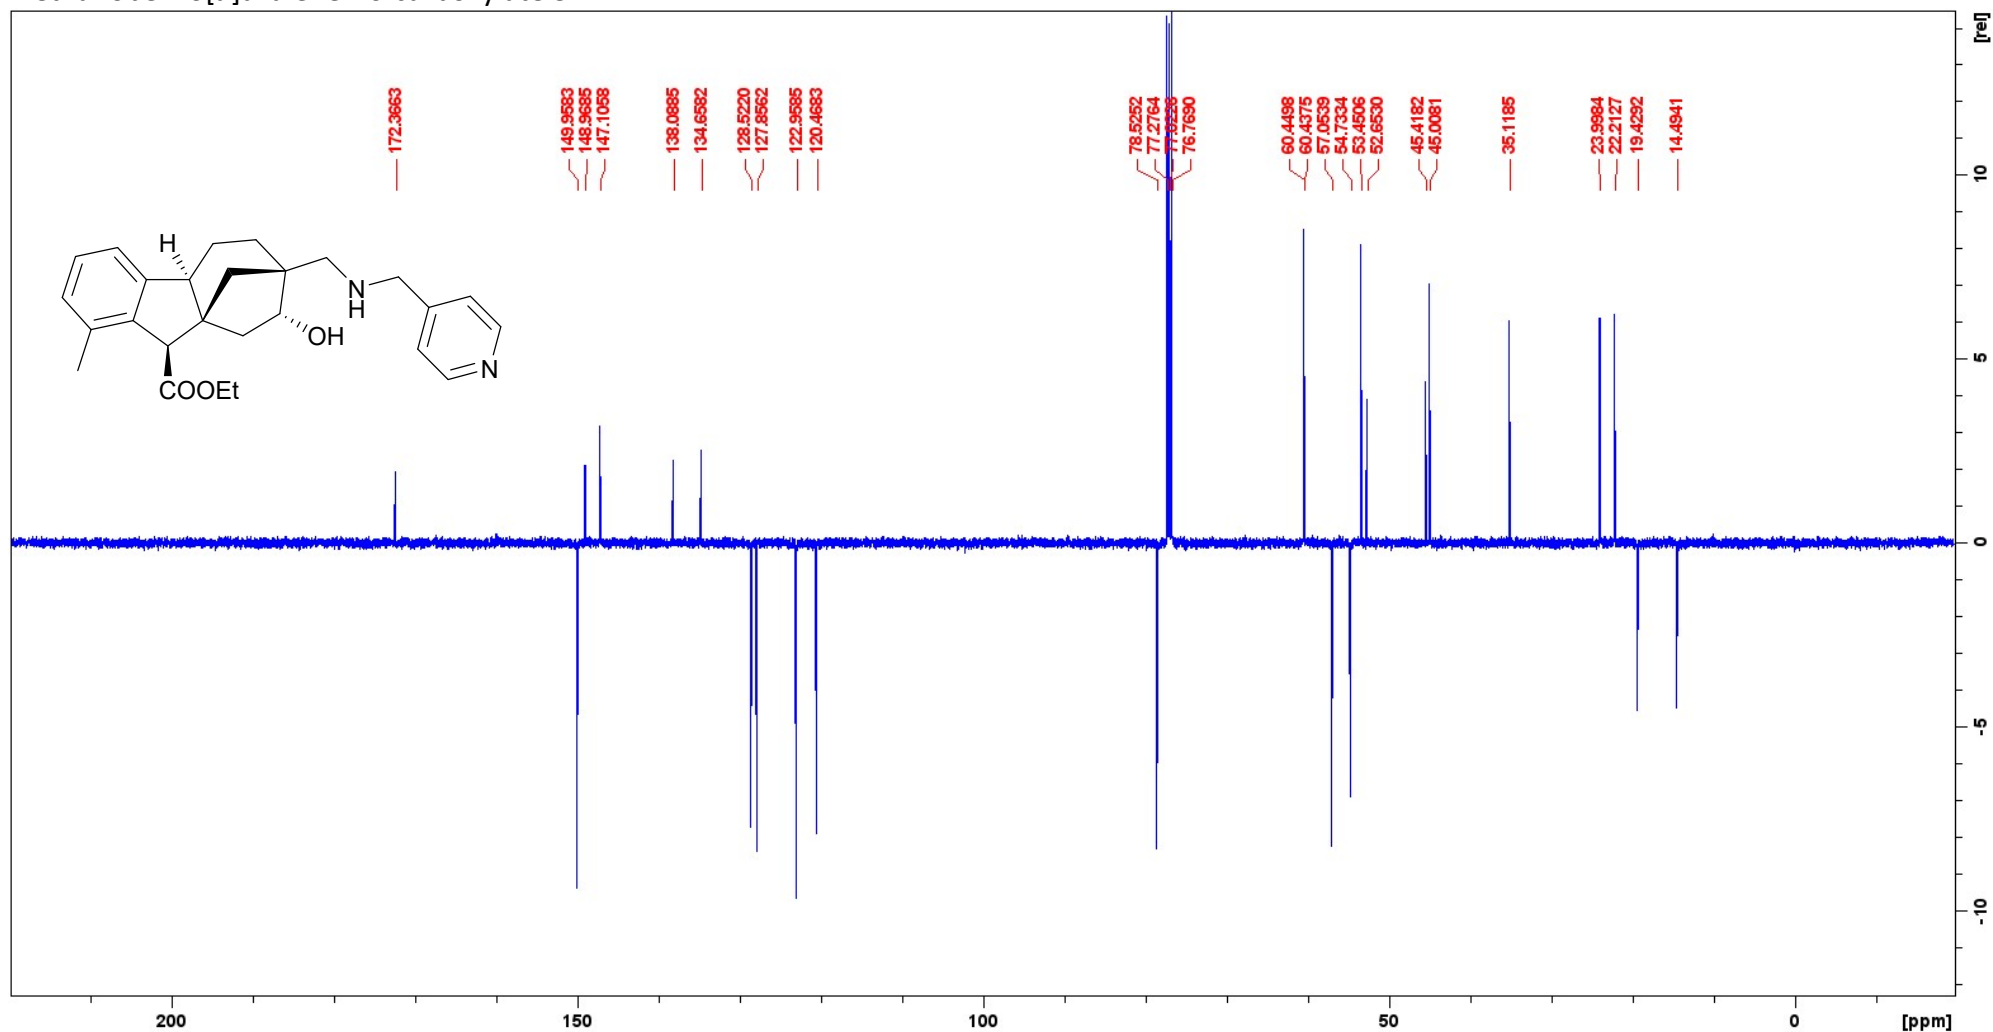



HSQC of ethyl (4*S*,7*S*,8*R*,9*aS*,10*R*)-8-hydroxy-1-methyl-7-(((pyridin-4-ylmethyl)amino)methyl)-4*b*,6,7,8,9,10-hexahydro-5*H*-7,9*a*-methanobenzo[*a*]azulene-10-carboxylate **37**

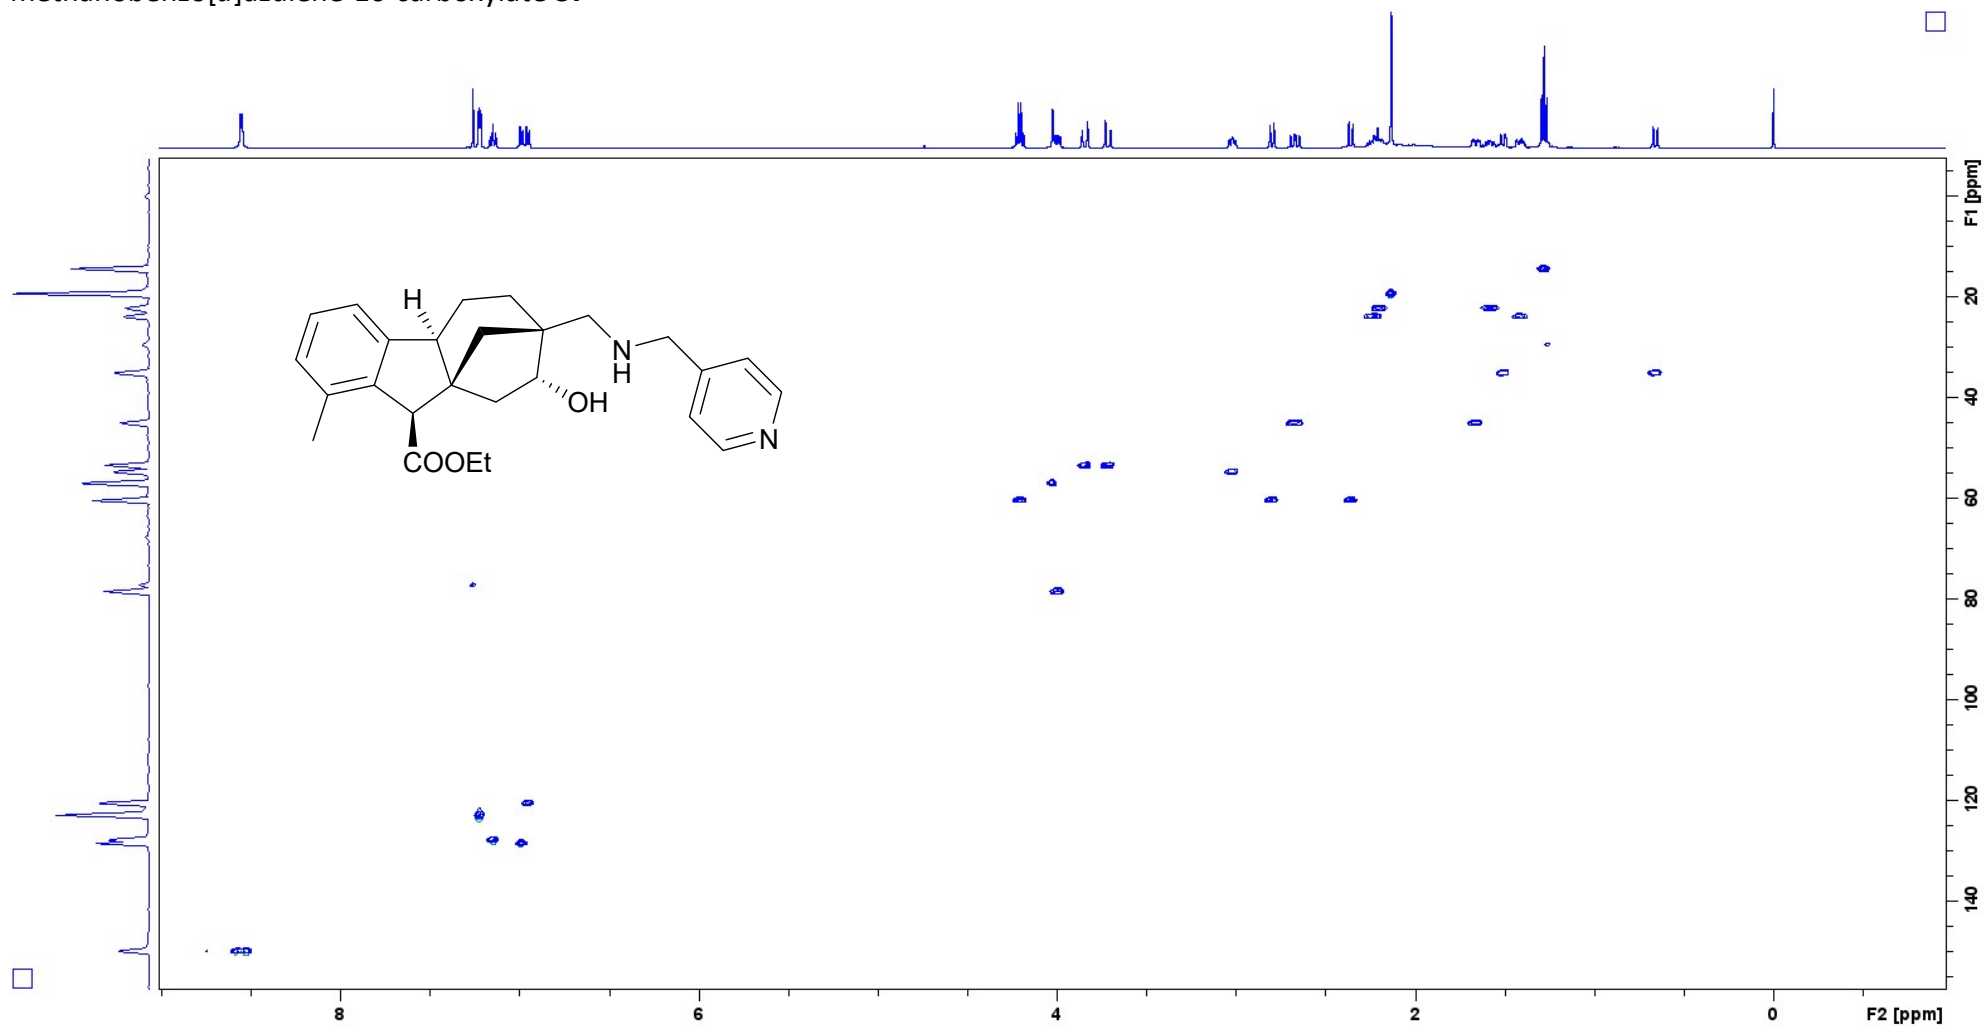

$^1\text{H-NMR}$  of ethyl (4*S*,7*S*,8*R*,9*aS*,10*R*)-8-hydroxy-1-methyl-7-(((*S*)-1-(naphthalen-2-yl)ethyl)amino)methyl)-4*b*,6,7,8,9,10-hexahydro-5*H*-7,9*a*-methanobenzo[*a*]azulene-10-carboxylate **26**

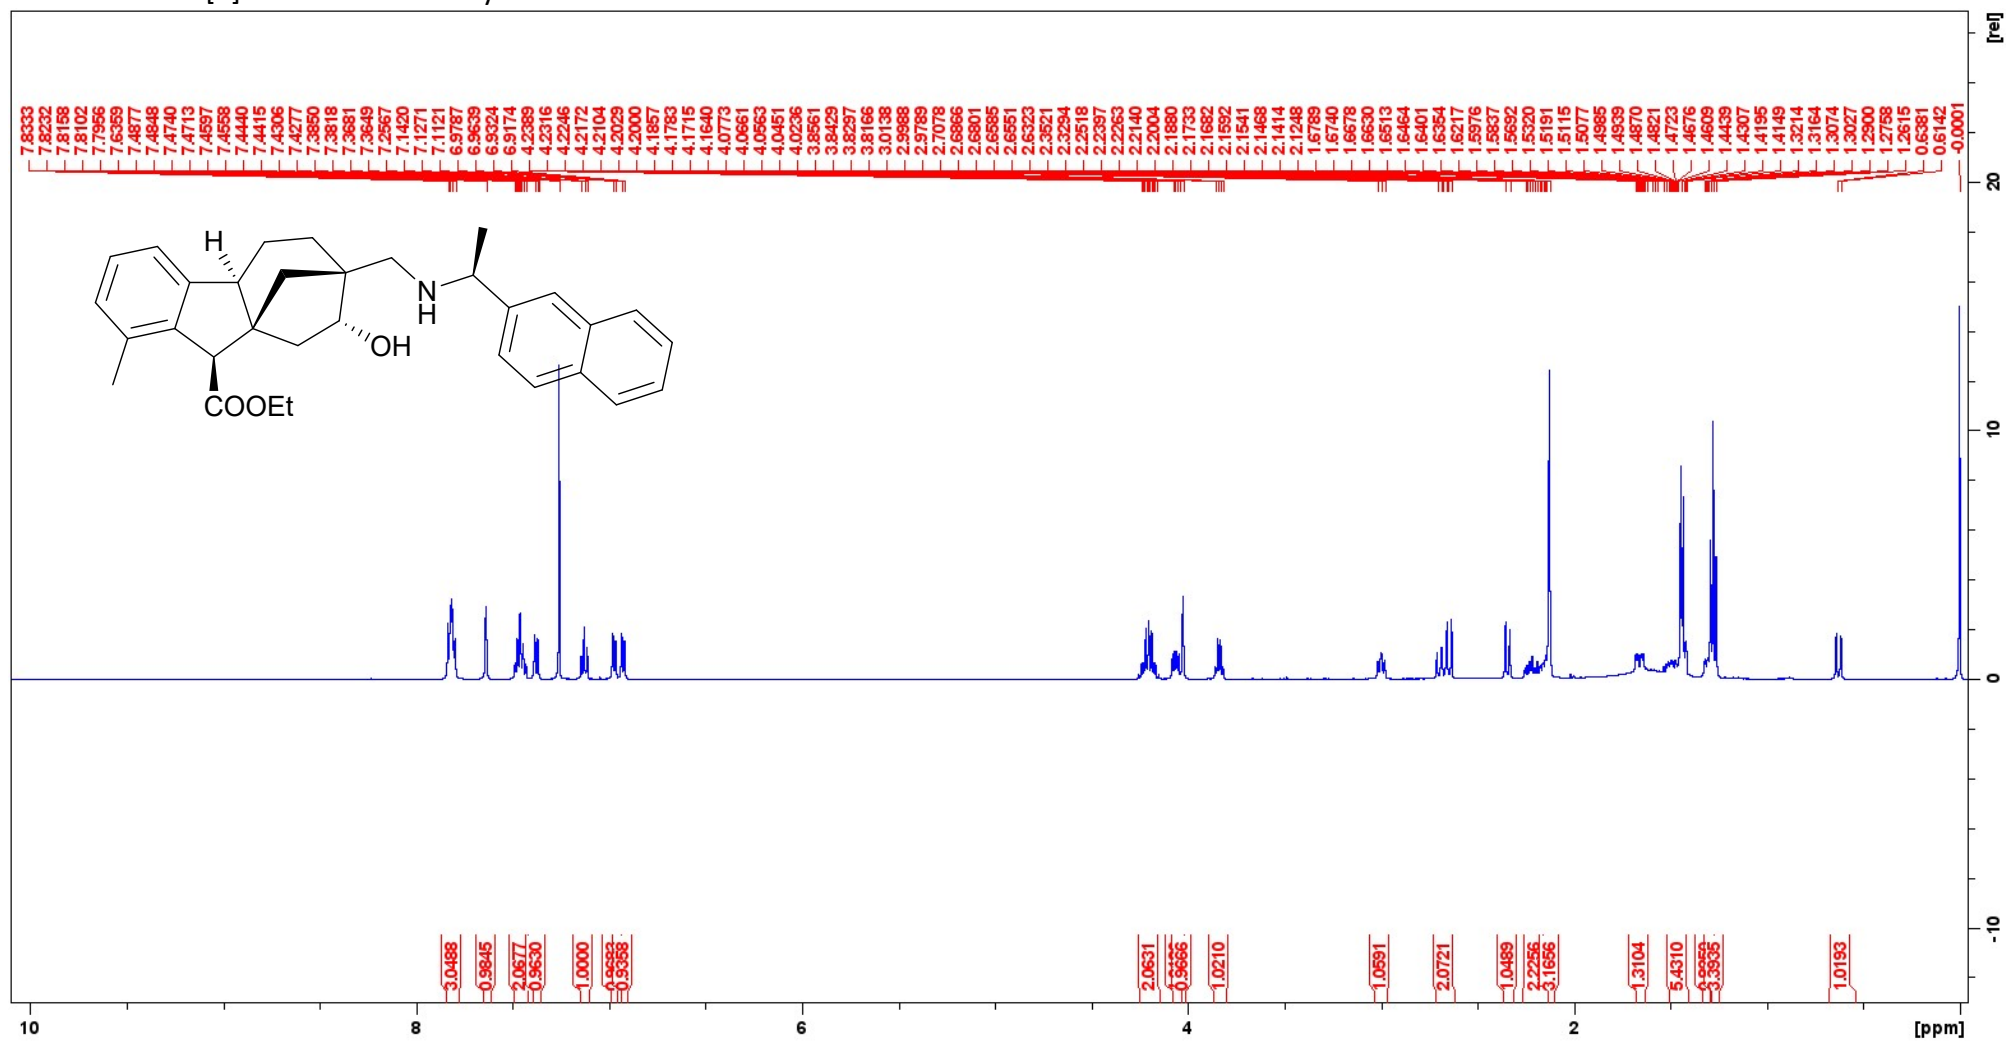

<sup>13</sup>C-NMR of ethyl (4*S*,7*S*,8*R*,9*aS*,10*R*)-8-hydroxy-1-methyl-7-(((*S*)-1-(naphthalen-2-yl)ethyl)amino)methyl)-4*b*,6,7,8,9,10-hexahydro-5*H*-7,9*a*-methanobenzo[*a*]azulene-10-carboxylate **26**

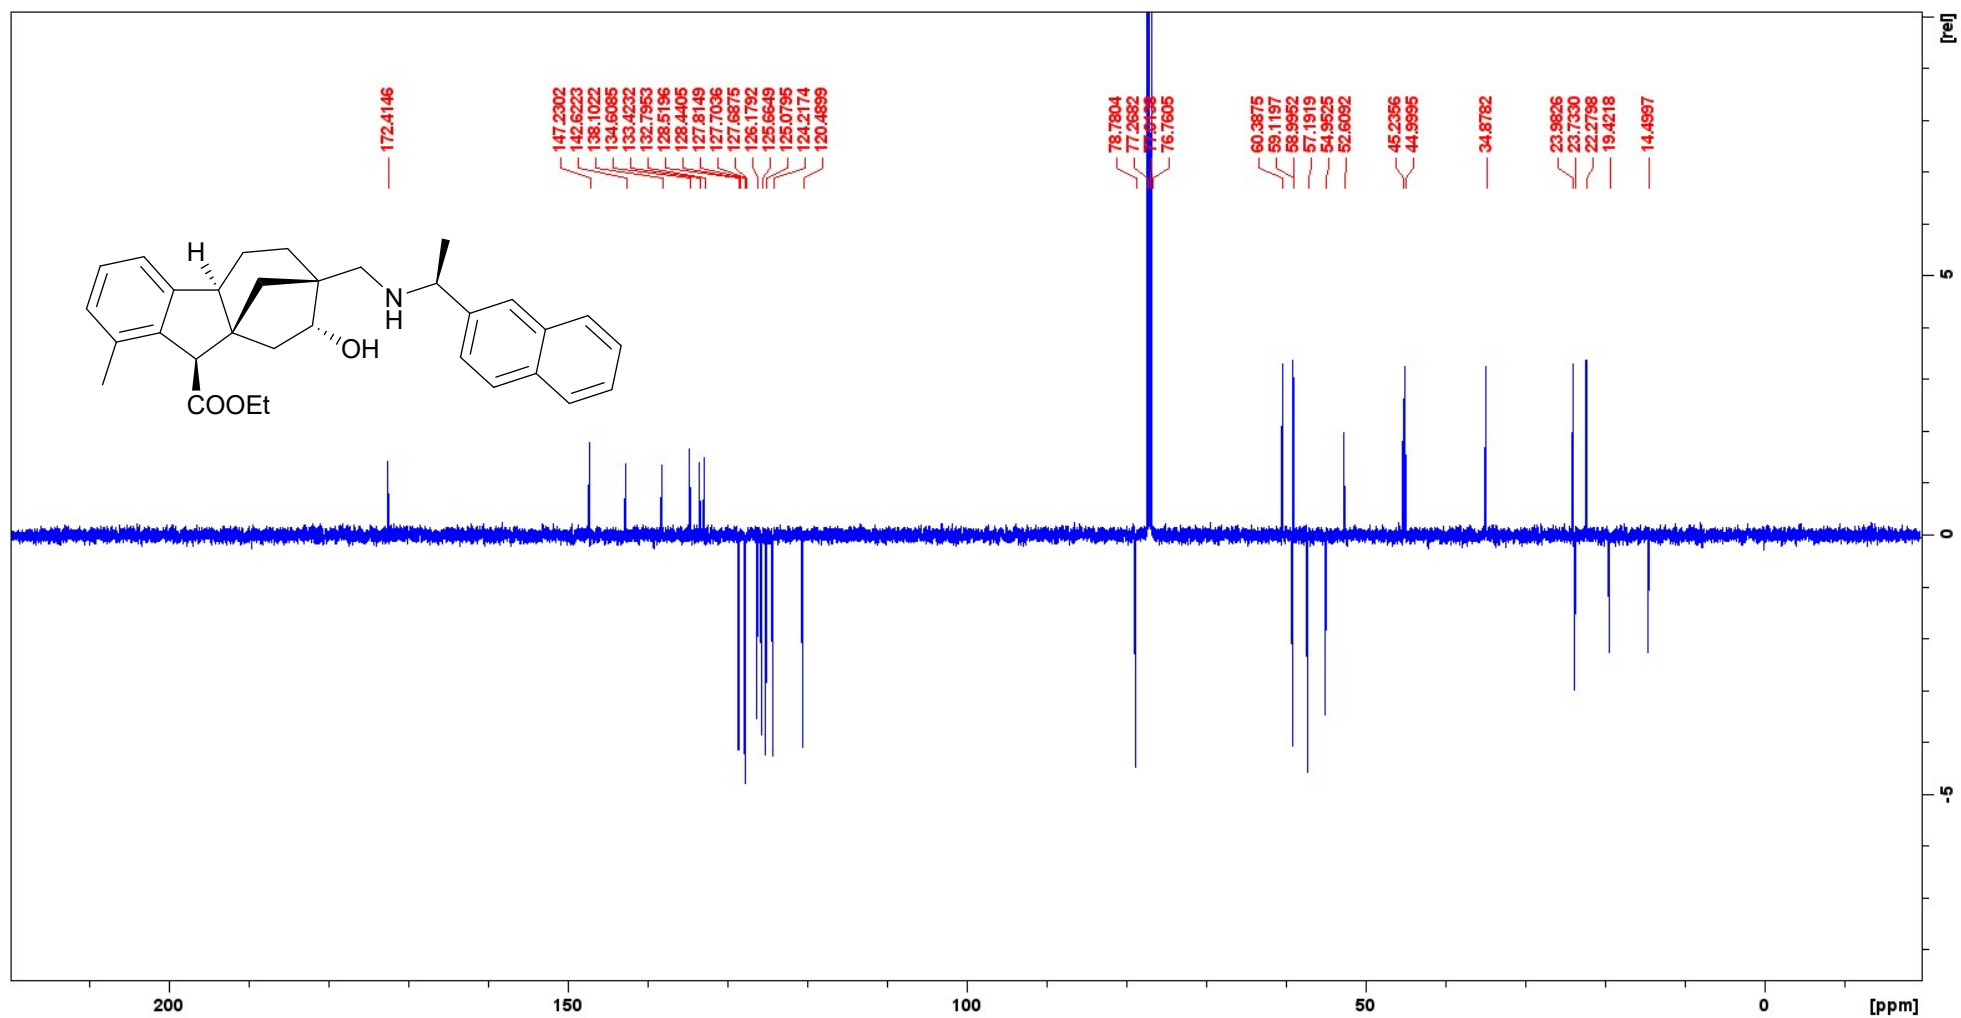

COSY of ethyl (4*S*,7*S*,8*R*,9*aS*,10*R*)-8-hydroxy-1-methyl-7-(((*S*)-1-(naphthalen-2-yl)ethyl)amino)methyl)-4*b*,6,7,8,9,10-hexahydro-5*H*-7,9*a*-methanobenzo[*a*]azulene-10-carboxylate **26**

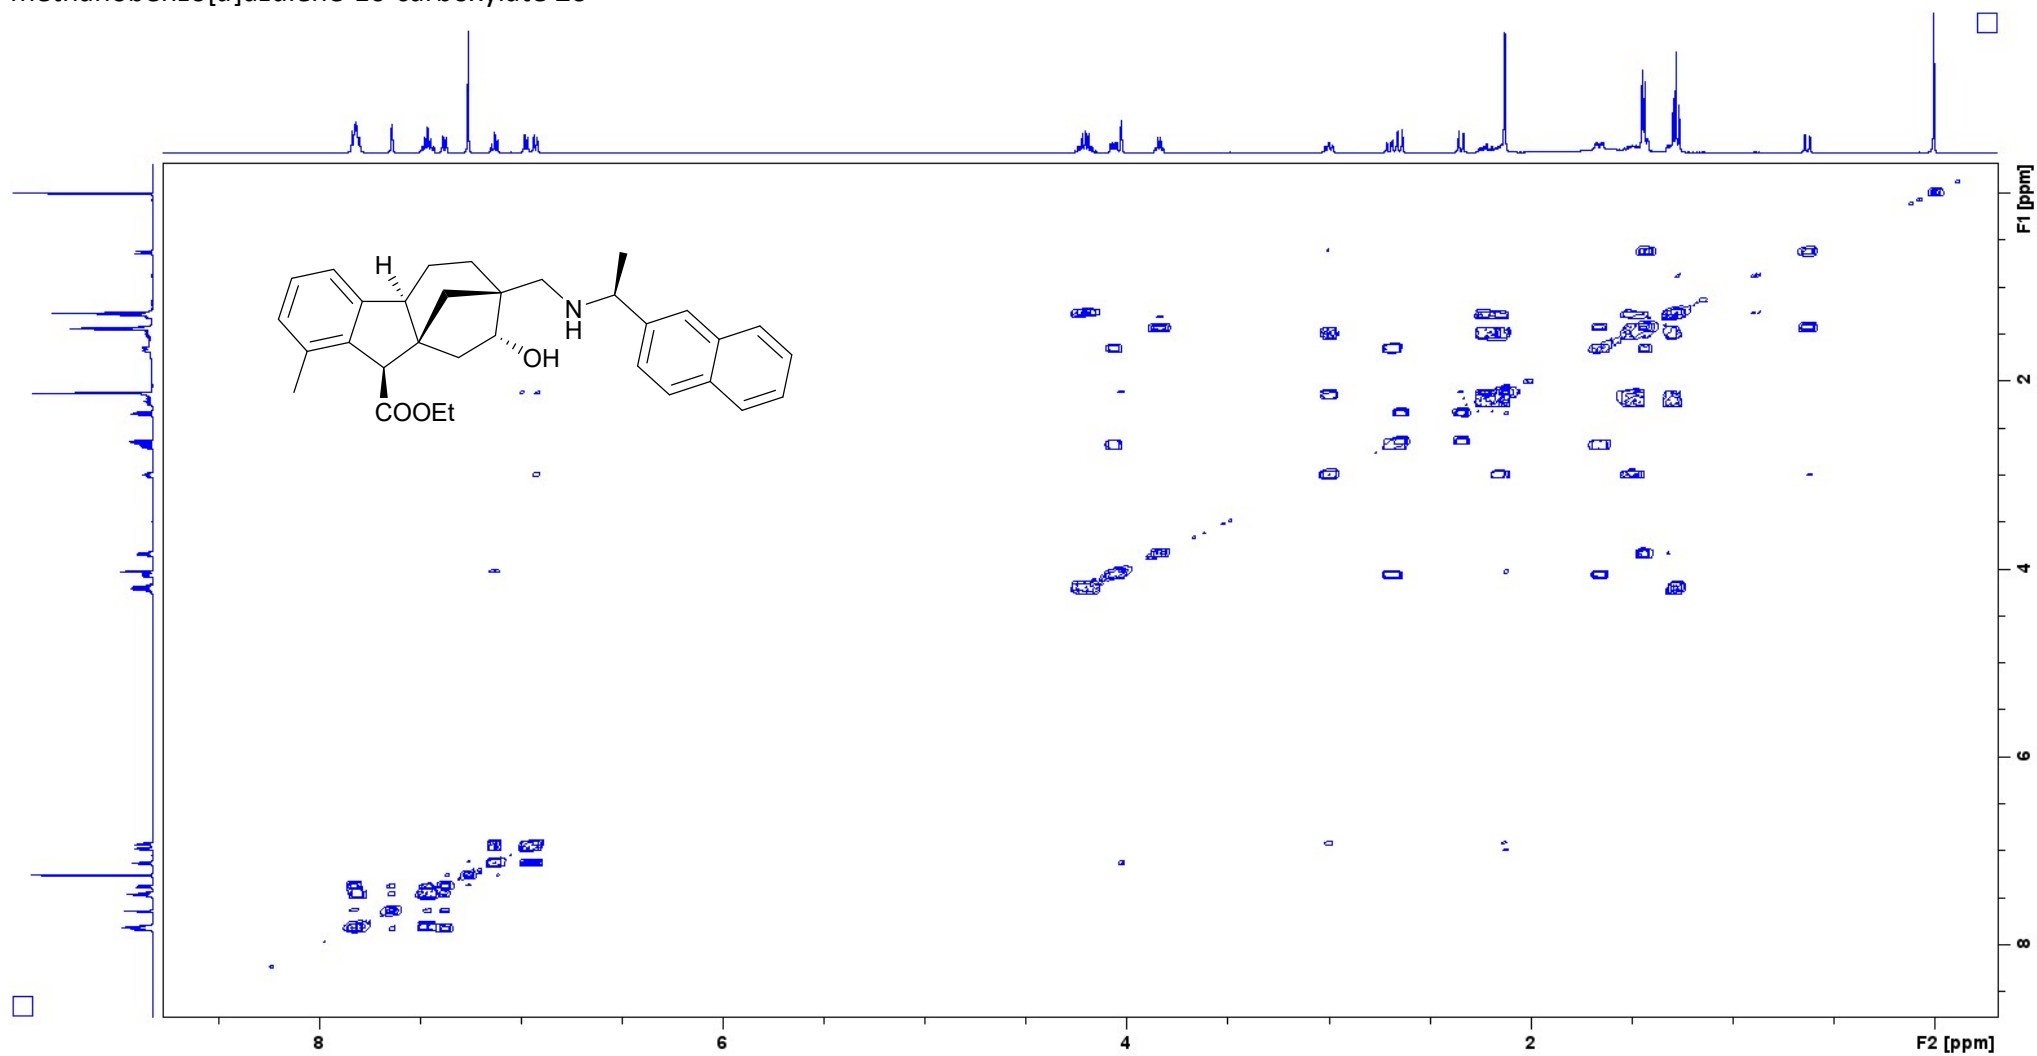

NOESY of ethyl (4*S*,7*S*,8*R*,9*aS*,10*R*)-8-hydroxy-1-methyl-7-(((*S*)-1-(naphthalen-2-yl)ethyl)amino)methyl)-4*b*,6,7,8,9,10-hexahydro-5*H*-7,9*a*-methanobenzo[*a*]azulene-10-carboxylate **26**

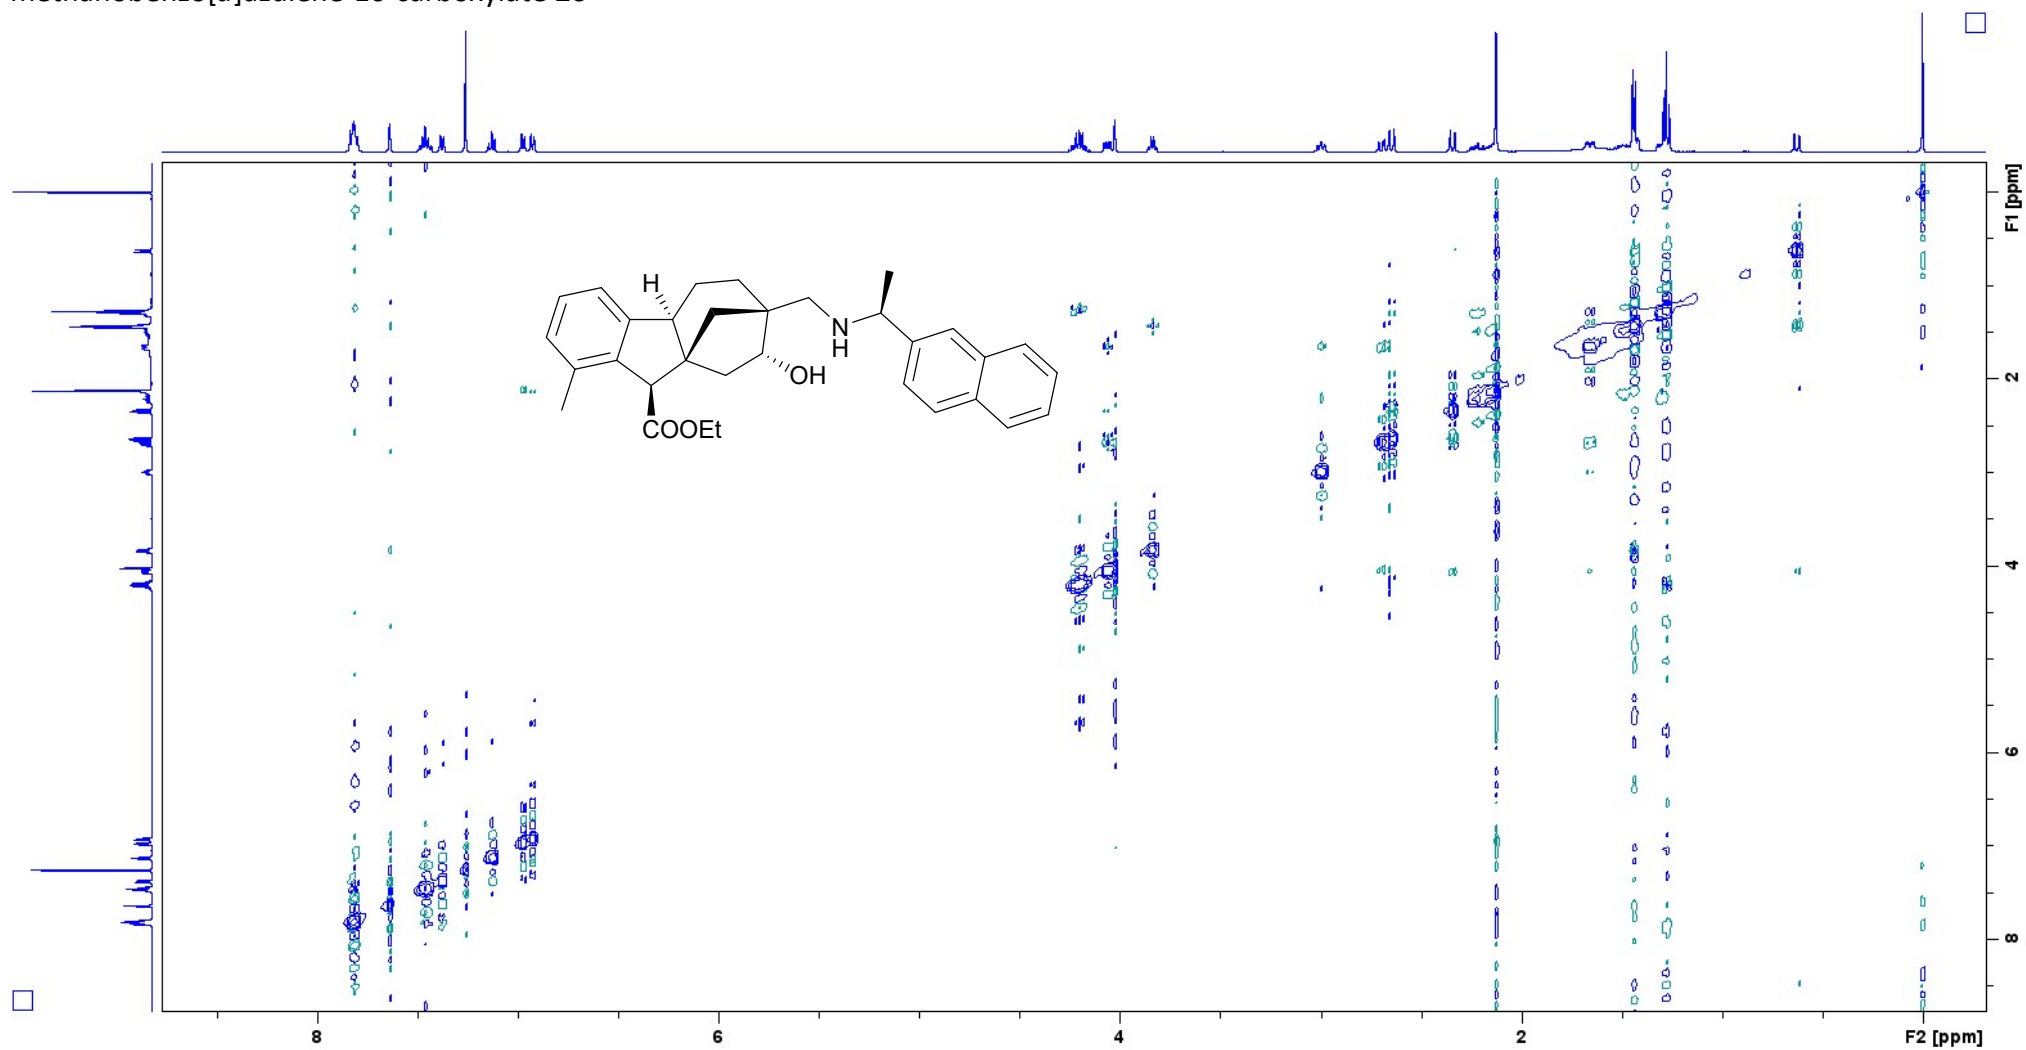

HSQC of ethyl (4*S*,7*S*,8*R*,9*aS*,10*R*)-8-hydroxy-1-methyl-7-(((*S*)-1-(naphthalen-2-yl)ethyl)amino)methyl)-4*b*,6,7,8,9,10-hexahydro-5*H*-7,9*a*-methanobenzo[*a*]azulene-10-carboxylate **26**

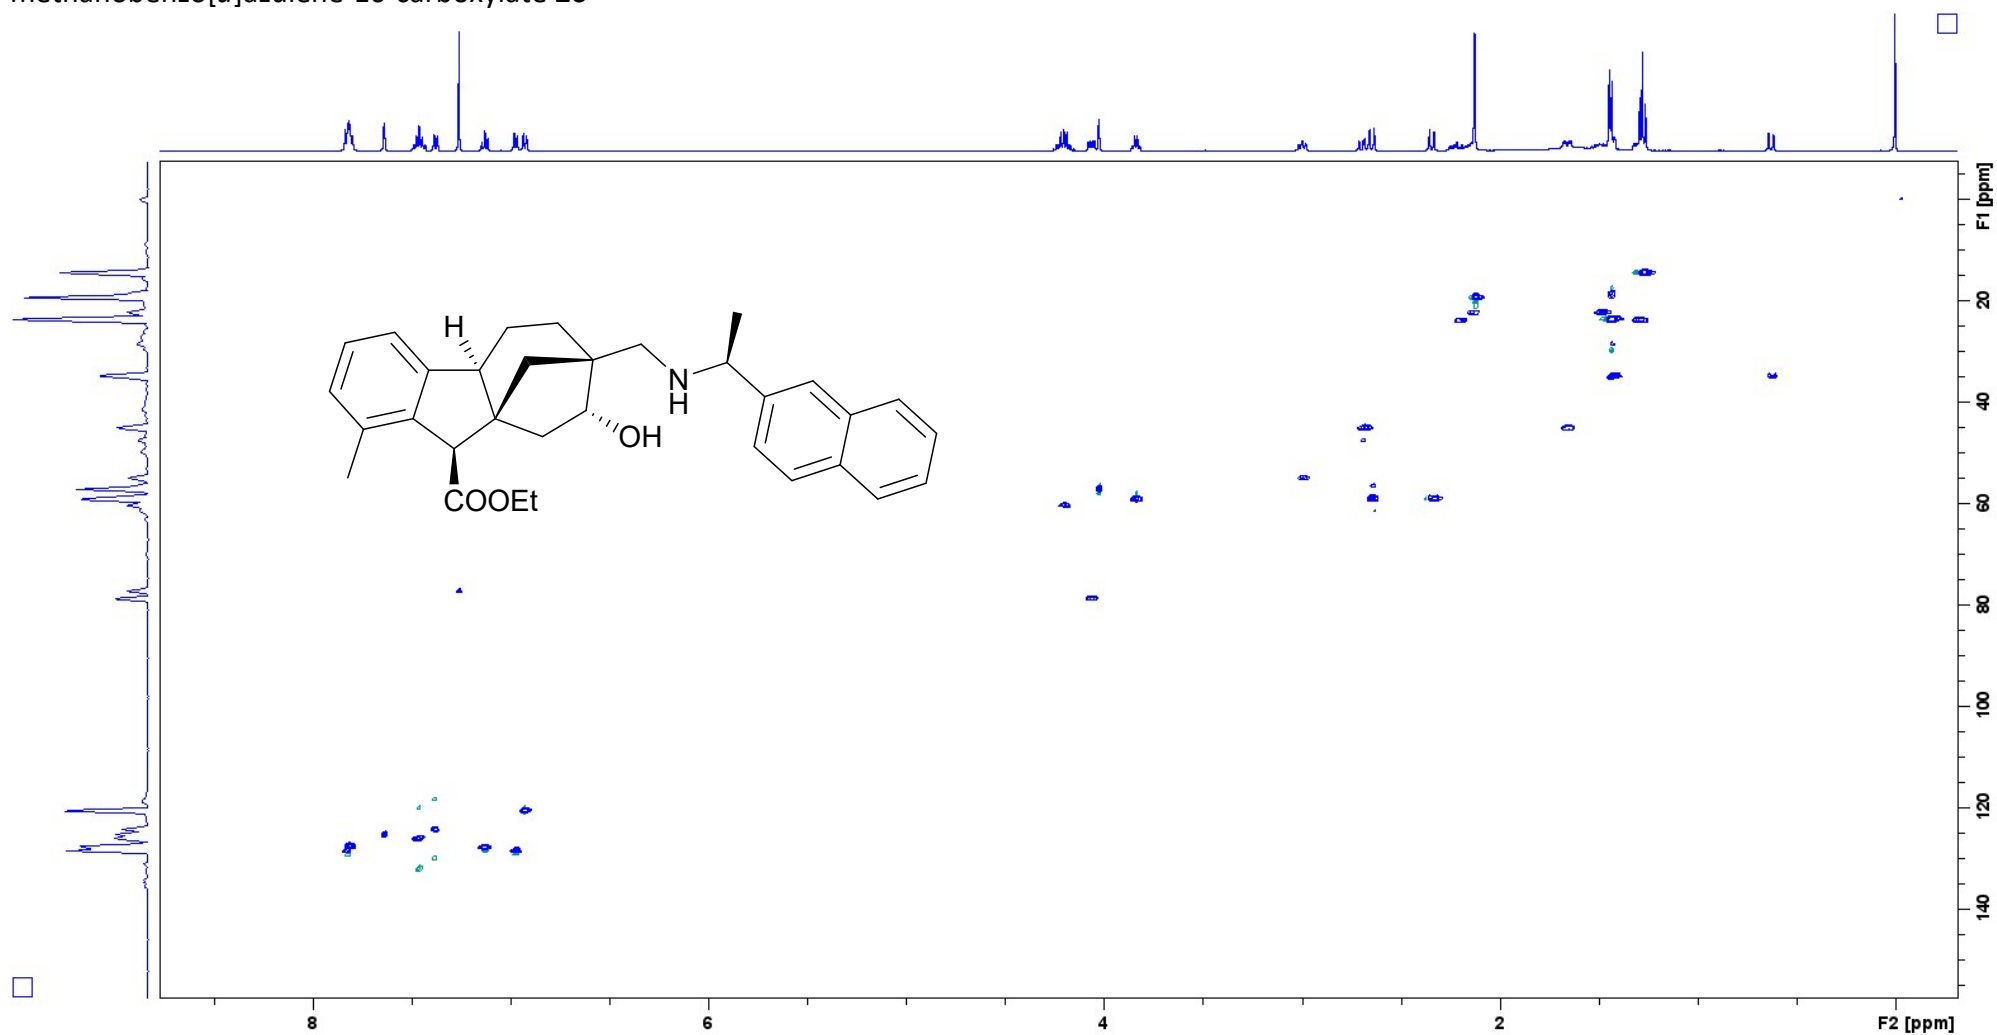

HMBC of ethyl (4*S*,7*S*,8*R*,9*aS*,10*R*)-8-hydroxy-1-methyl-7-(((*S*)-1-(naphthalen-2-yl)ethyl)amino)methyl)-4*b*,6,7,8,9,10-hexahydro-5*H*-7,9a-methanobenzo[*a*]azulene-10-carboxylate **26**

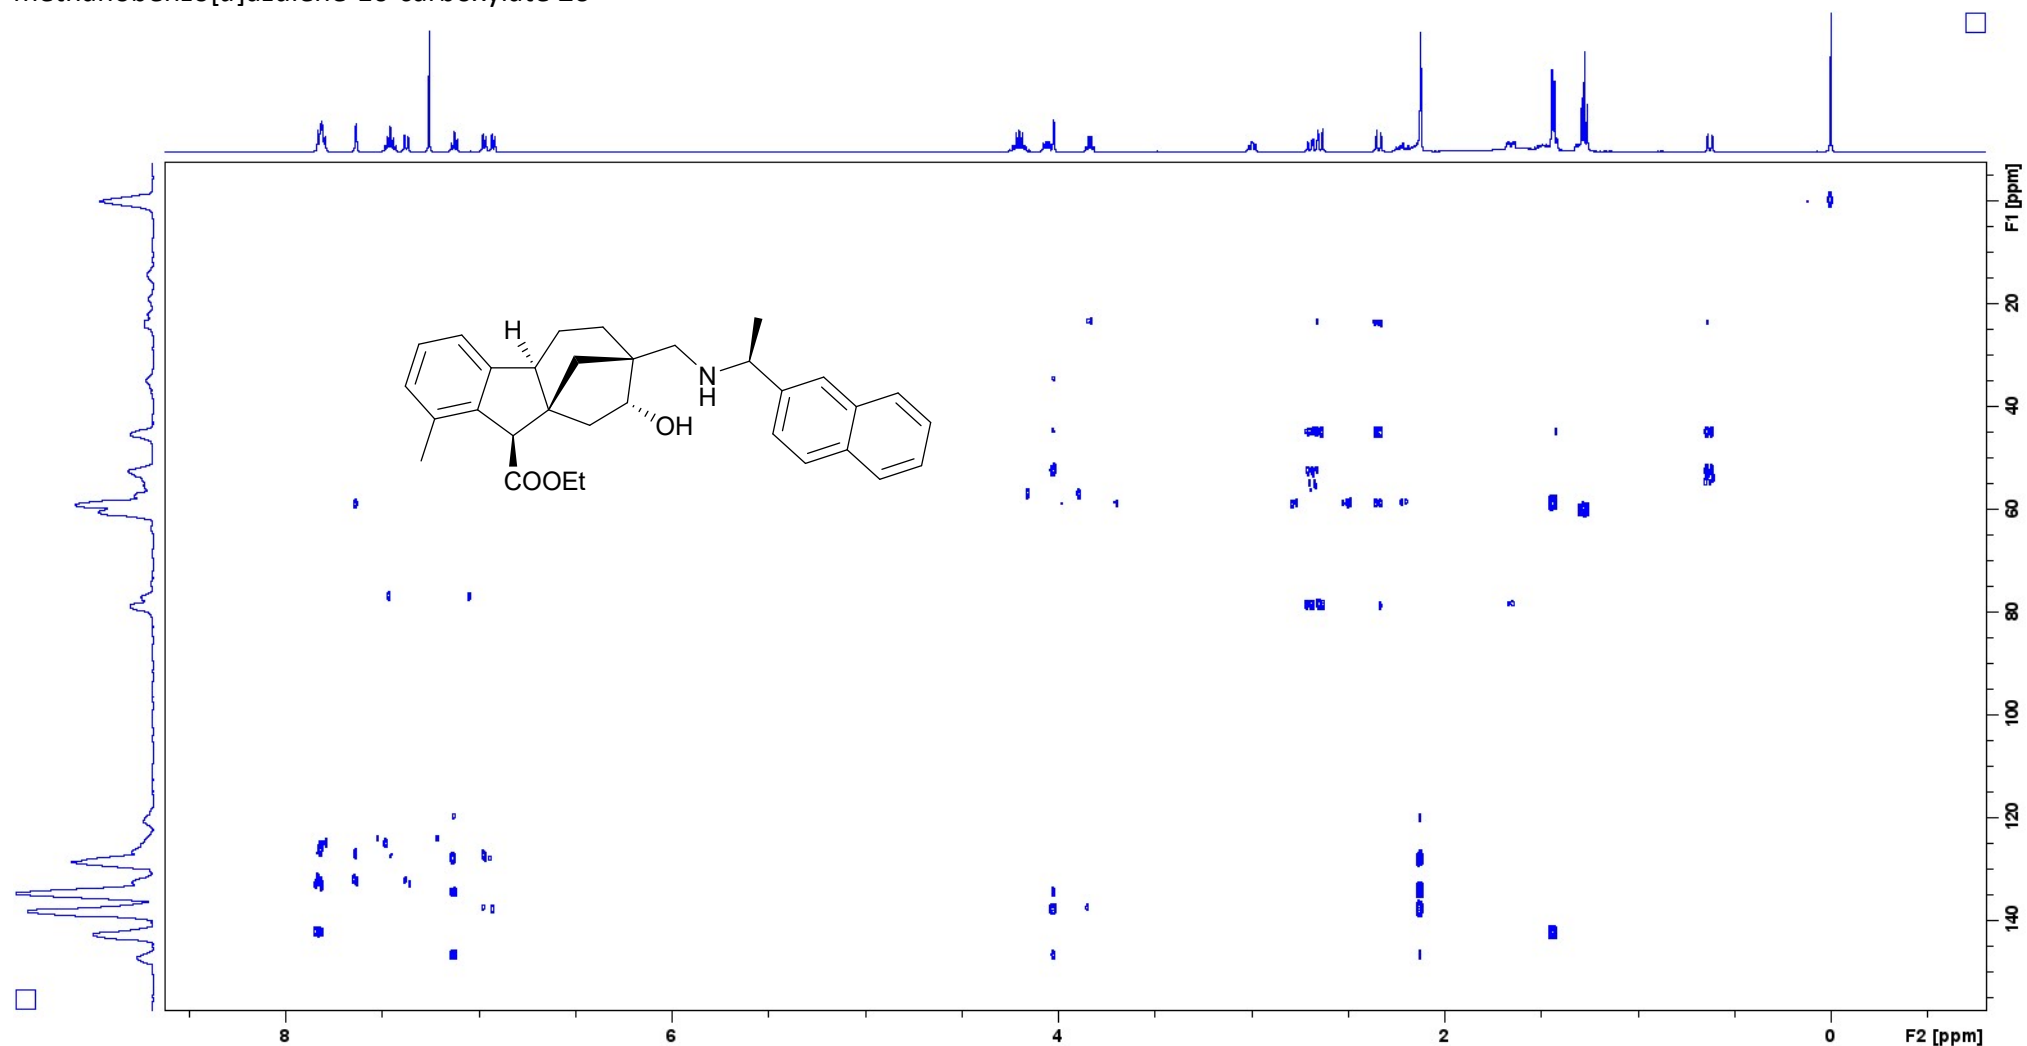

<sup>1</sup>H-NMR of ethyl (4*S*,7*S*,8*R*,9*aS*,10*R*)-8-hydroxy-1-methyl-7-(((*R*)-1-(naphthalen-2-yl)ethyl)amino)methyl)-4*b*,6,7,8,9,10-hexahydro-5*H*-7,9*a*-methanobenzo[*a*]azulene-10-carboxylate **27**

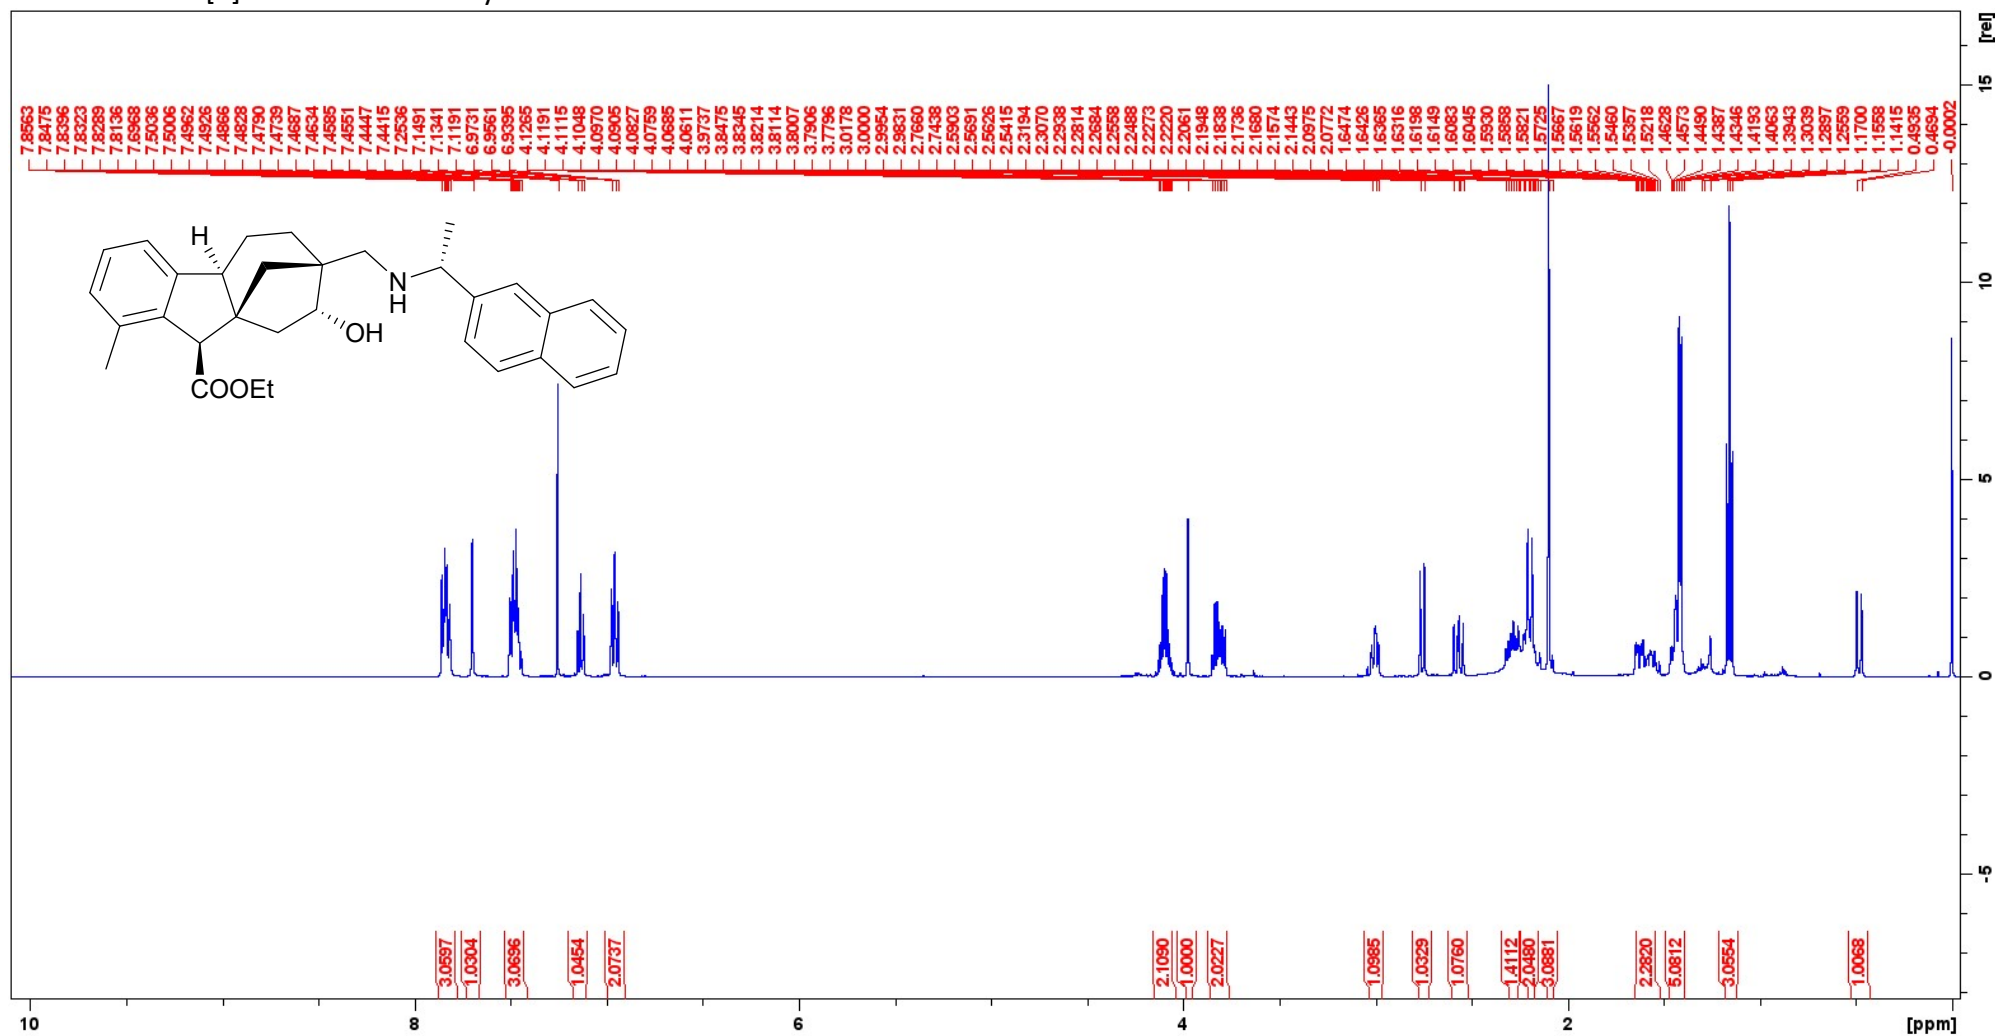



<sup>13</sup>C-NMR of ethyl (4*bS*,7*S*,8*R*,9*aS*,10*R*)-8-hydroxy-1-methyl-7-(((*R*)-1-(naphthalen-2-yl)ethyl)amino)methyl)-4*b*,6,7,8,9,10-hexahydro-5*H*-7,9*a*-methanobenzo[*a*]azulene-10-carboxylate **27**

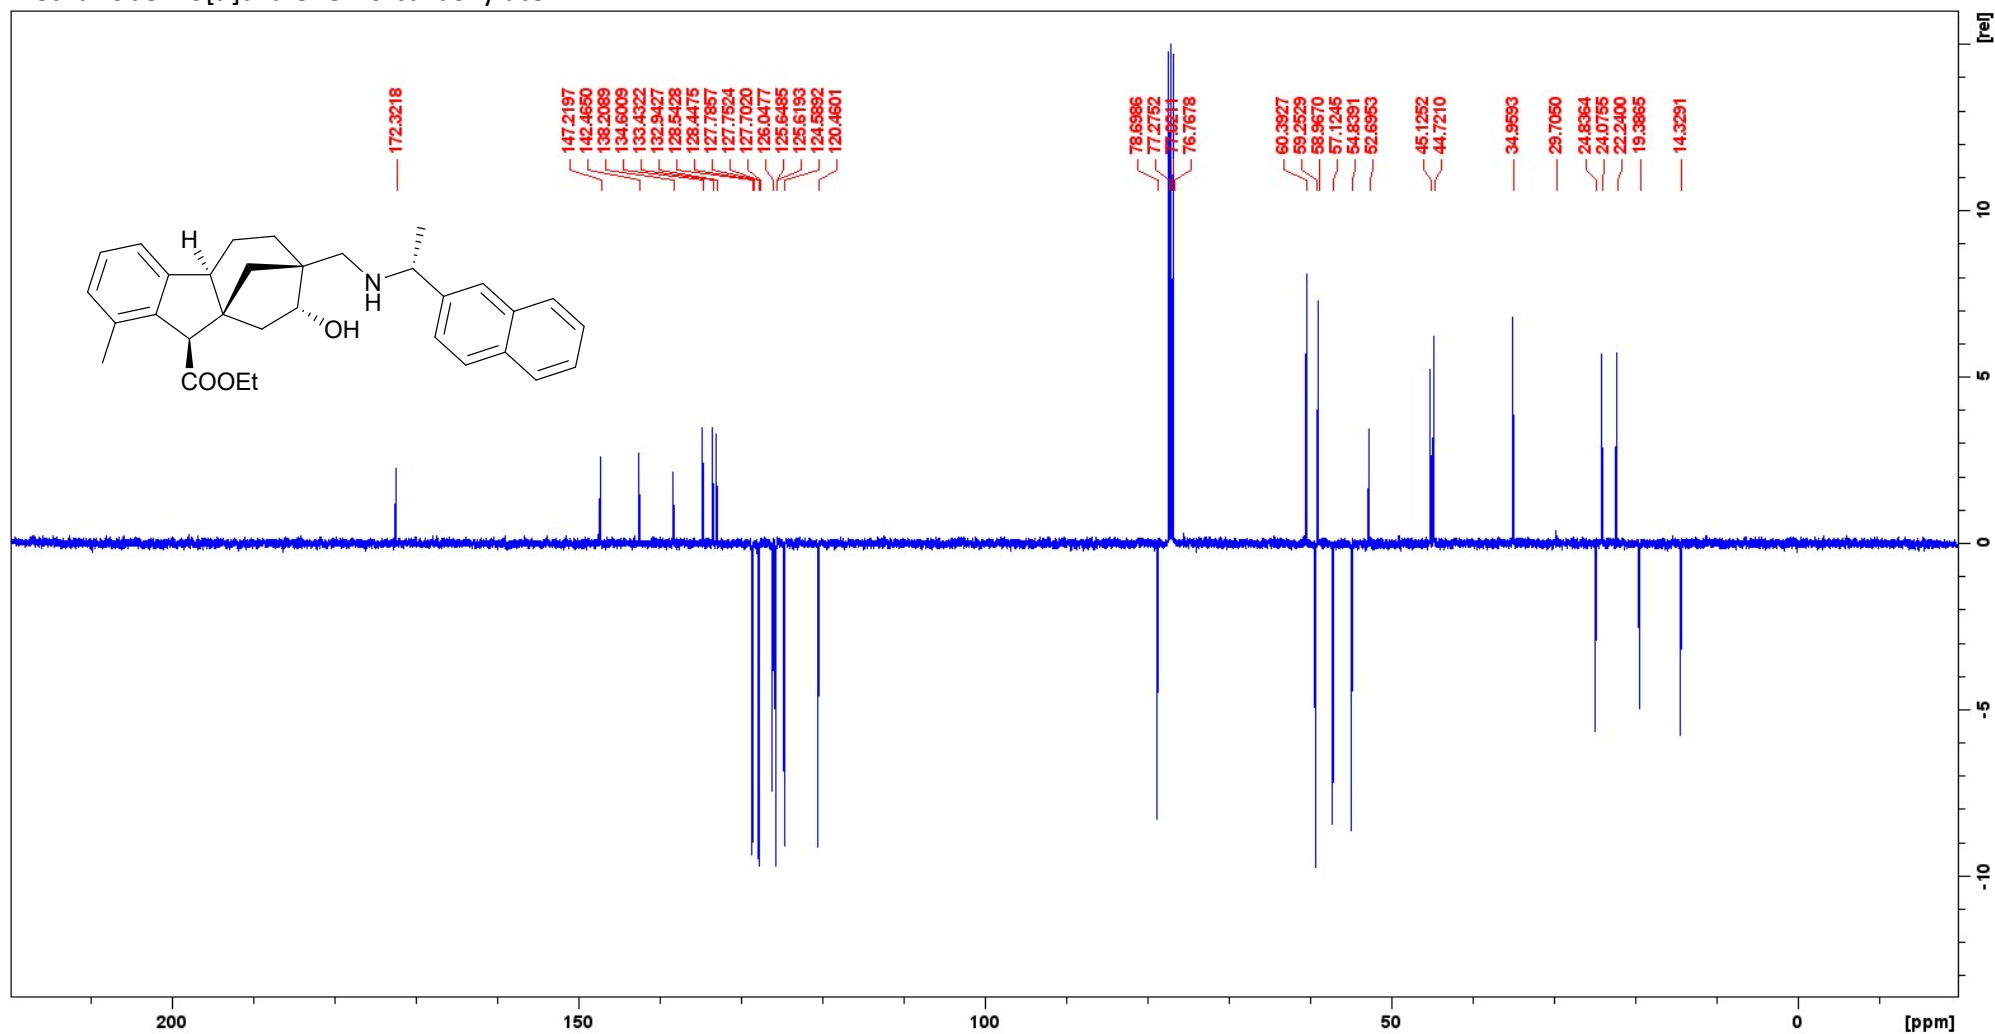

COSY of ethyl (4*S*,7*S*,8*R*,9*aS*,10*R*)-8-hydroxy-1-methyl-7-(((*R*)-1-(naphthalen-2-yl)ethyl)amino)methyl)-4*b*,6,7,8,9,10-hexahydro-5*H*-7,9*a*-methanobenzo[*a*]azulene-10-carboxylate **27**

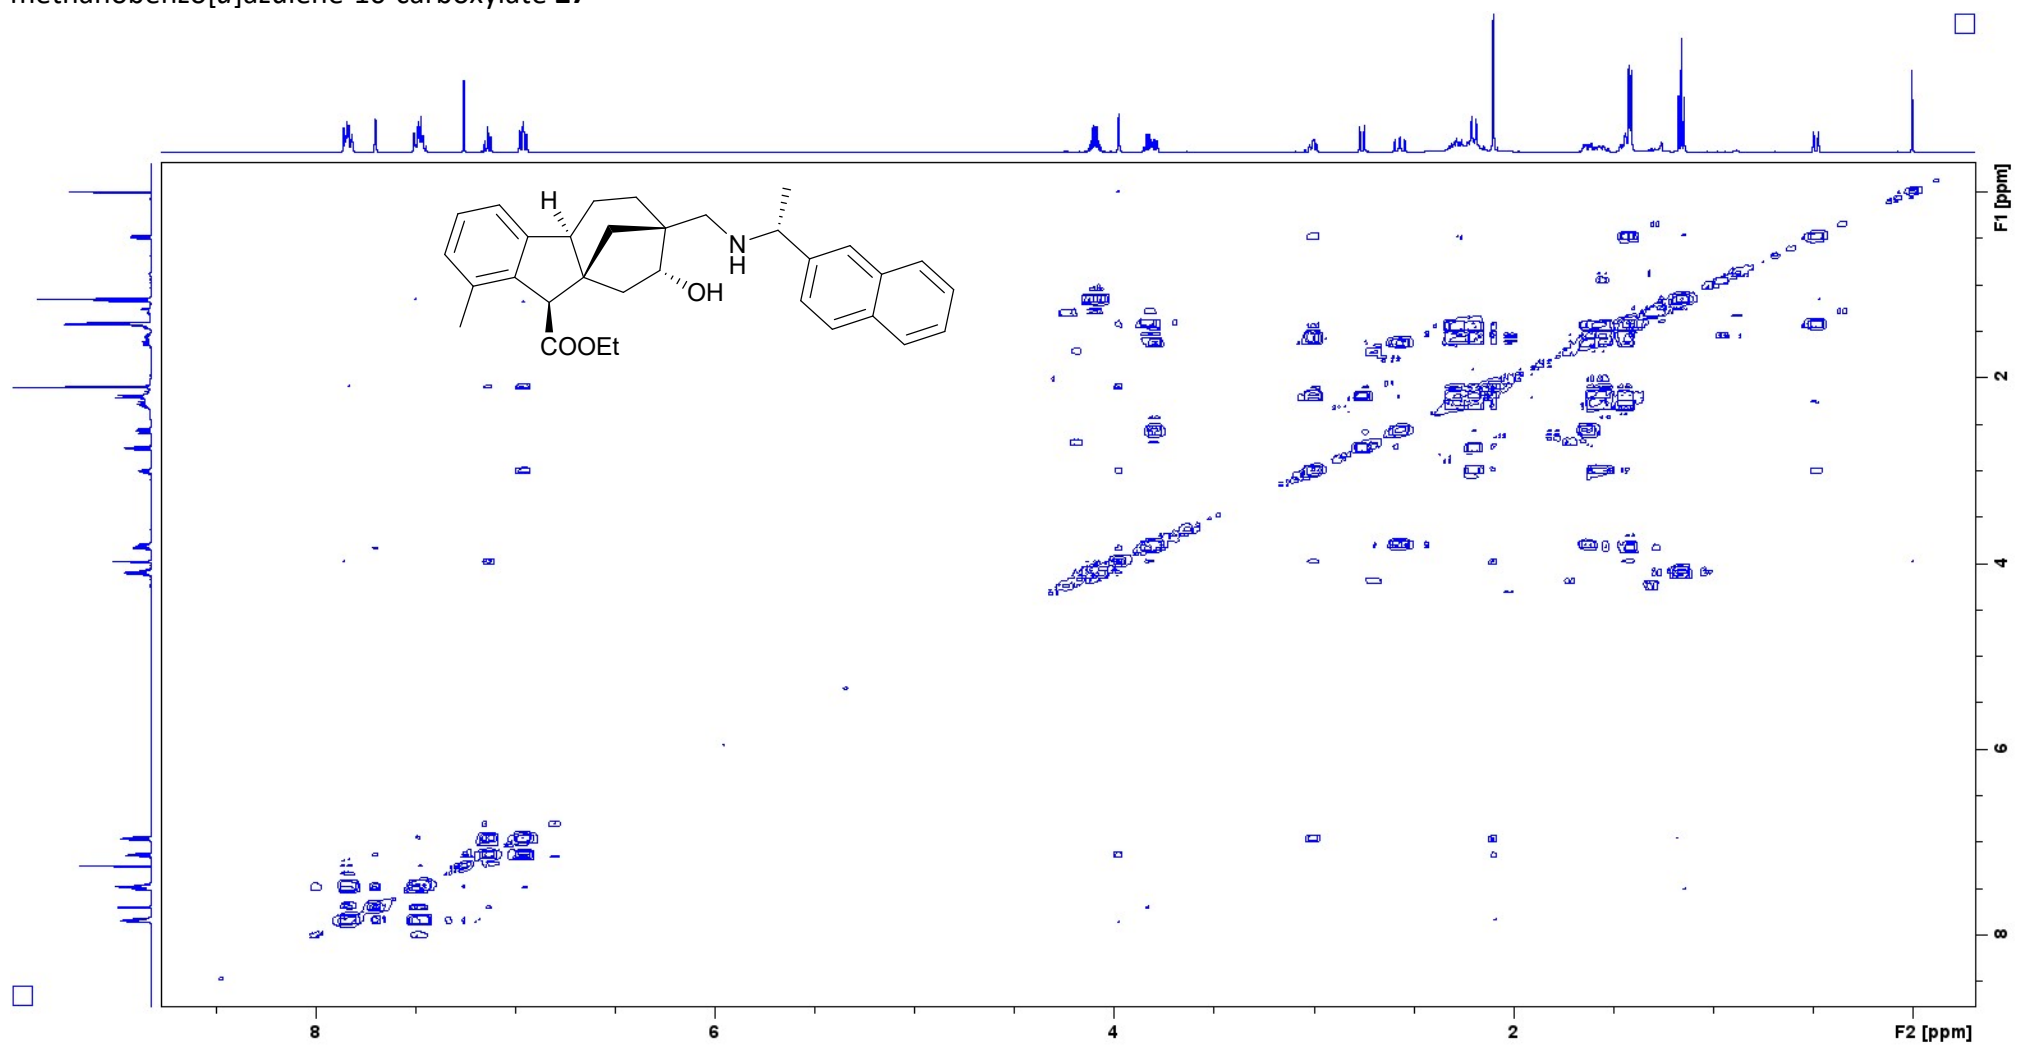

NOESY of ethyl (4*b**S*,7*S*,8*R*,9*a**S*,10*R*)-8-hydroxy-1-methyl-7-(((*R*)-1-(naphthalen-2-yl)ethyl)amino)methyl)-4*b*,6,7,8,9,10-hexahydro-5*H*-7,9*a*-methanobenzo[*a*]azulene-10-carboxylate **27**

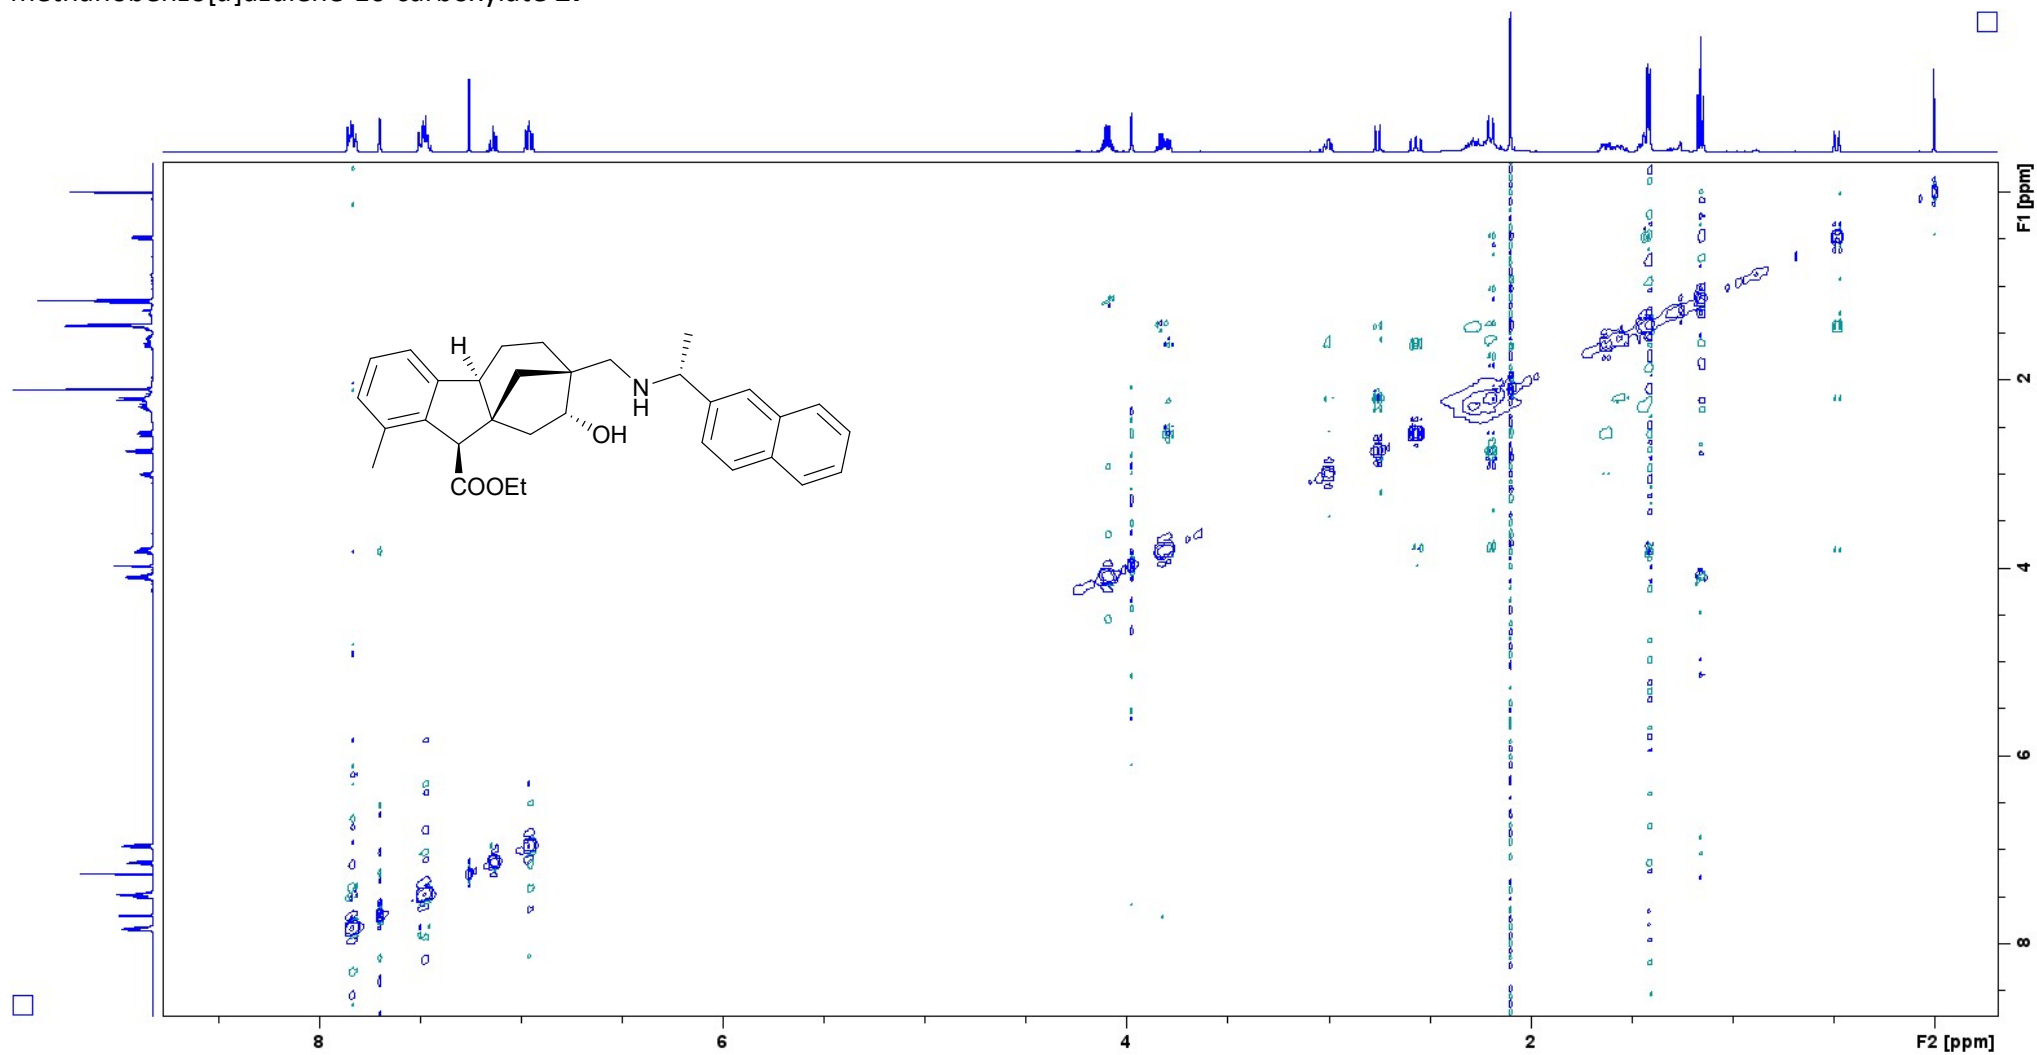

HSQC of ethyl (4*b**S*,7*S*,8*R*,9*a**S*,10*R*)-8-hydroxy-1-methyl-7-(((*R*)-1-(naphthalen-2-yl)ethyl)amino)methyl)-4*b*,6,7,8,9,10-hexahydro-5*H*-7,9a-methanobenzo[*a*]azulene-10-carboxylate **27**

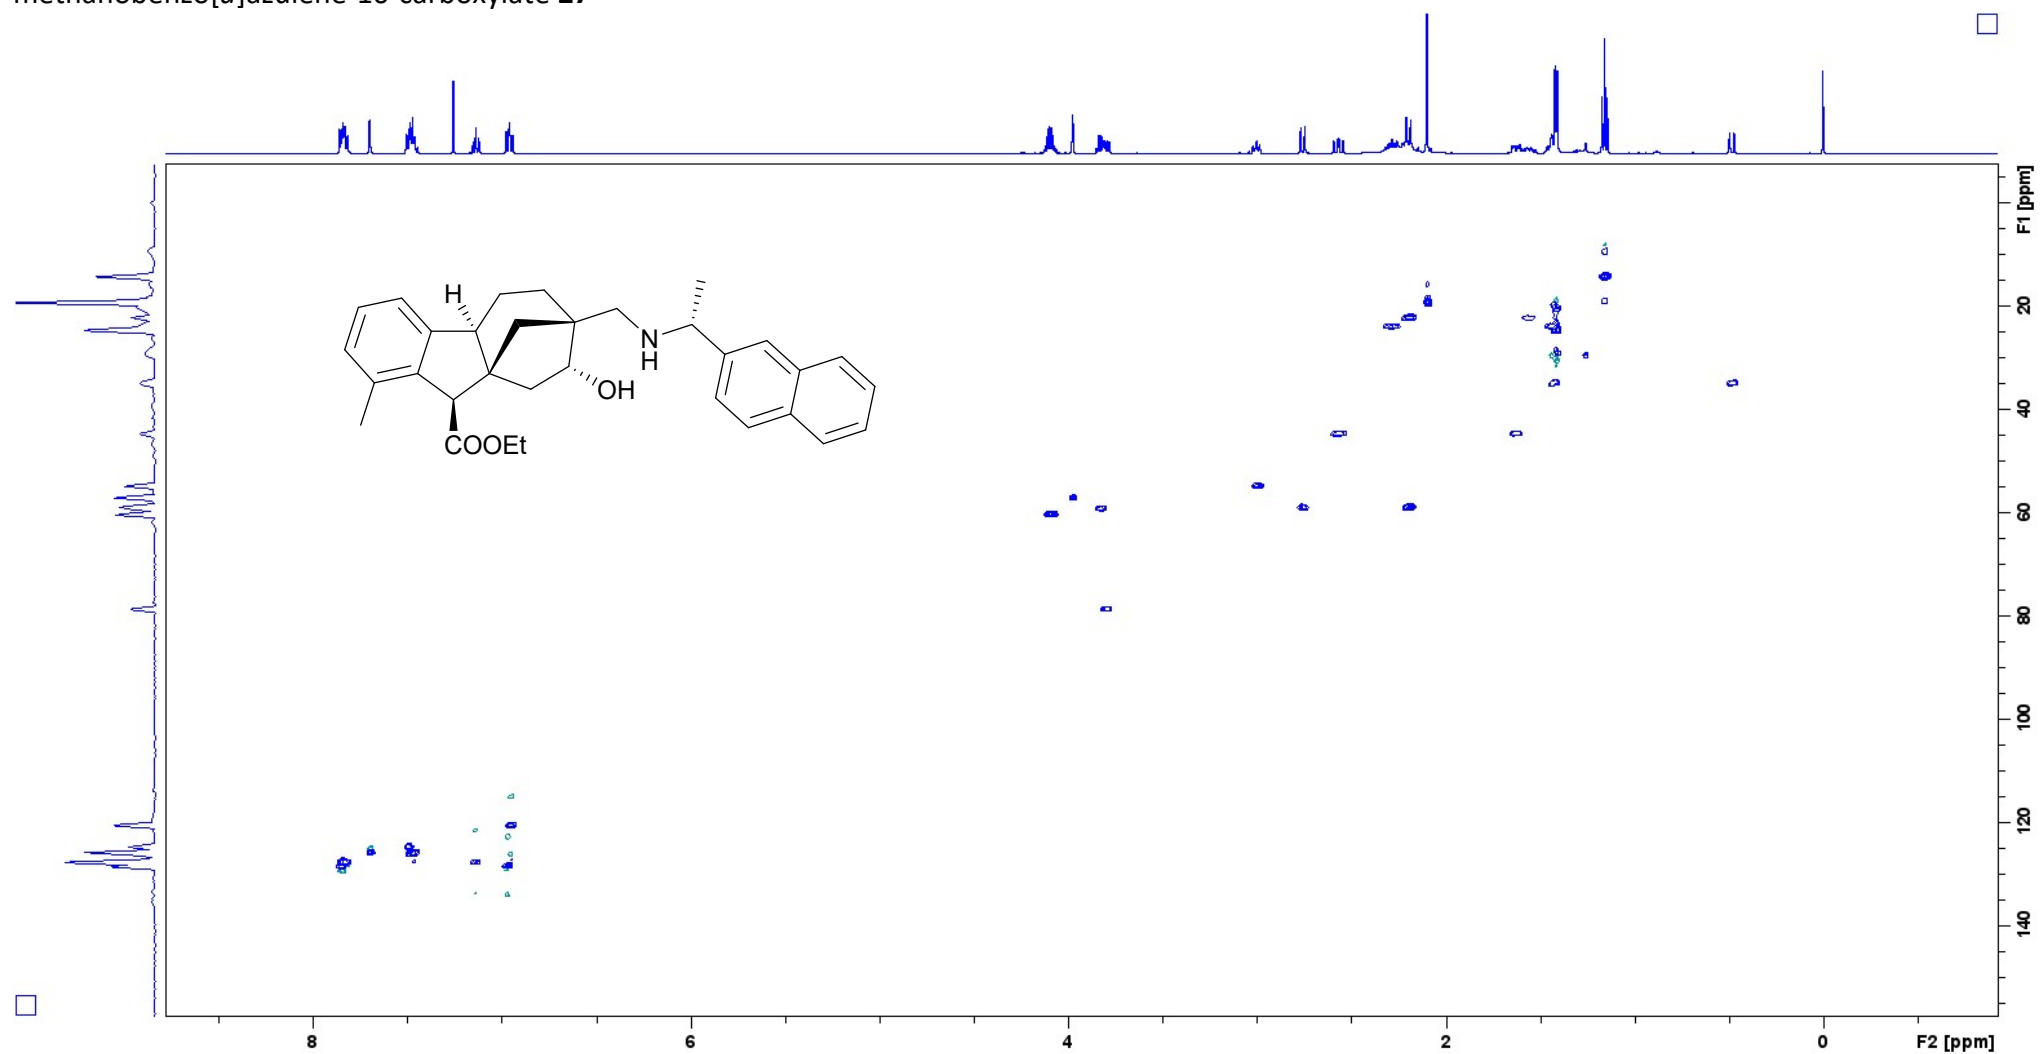

HMBC of ethyl (4*S*,7*S*,8*R*,9*aS*,10*R*)-8-hydroxy-1-methyl-7-(((*R*)-1-(naphthalen-2-yl)ethyl)amino)methyl)-4*b*,6,7,8,9,10-hexahydro-5*H*-7,9a-methanobenzo[*a*]azulene-10-carboxylate **27**

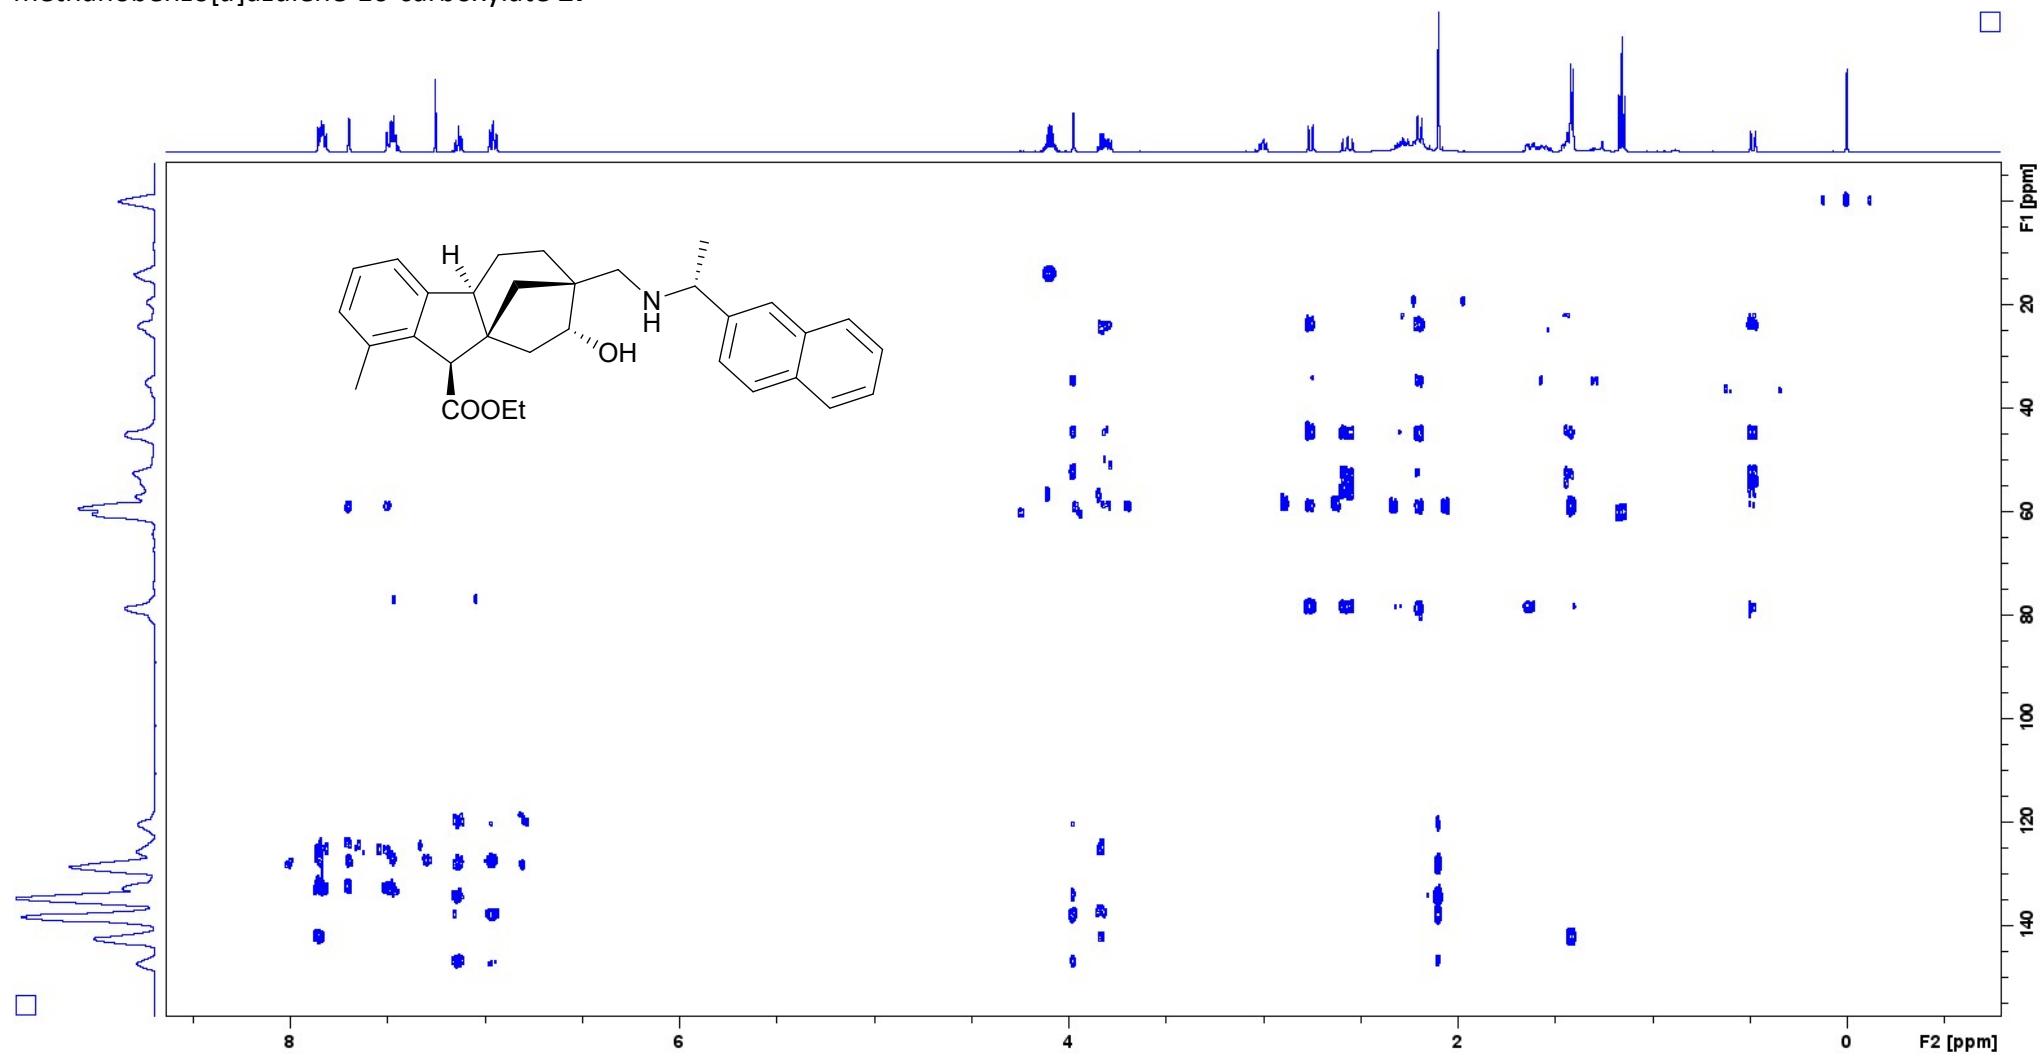

<sup>1</sup>H-NMR of ethyl (4*S*,7*S*,8*R*,9*a**S*,10*R*)-8-hydroxy-1-methyl-7-(((*S*)-1-(naphthalen-1-yl)ethyl)amino)methyl)-4*b*,6,7,8,9,10-hexahydro-5*H*-7,9*a*-methanobenzo[*a*]azulene-10-carboxylate **28**

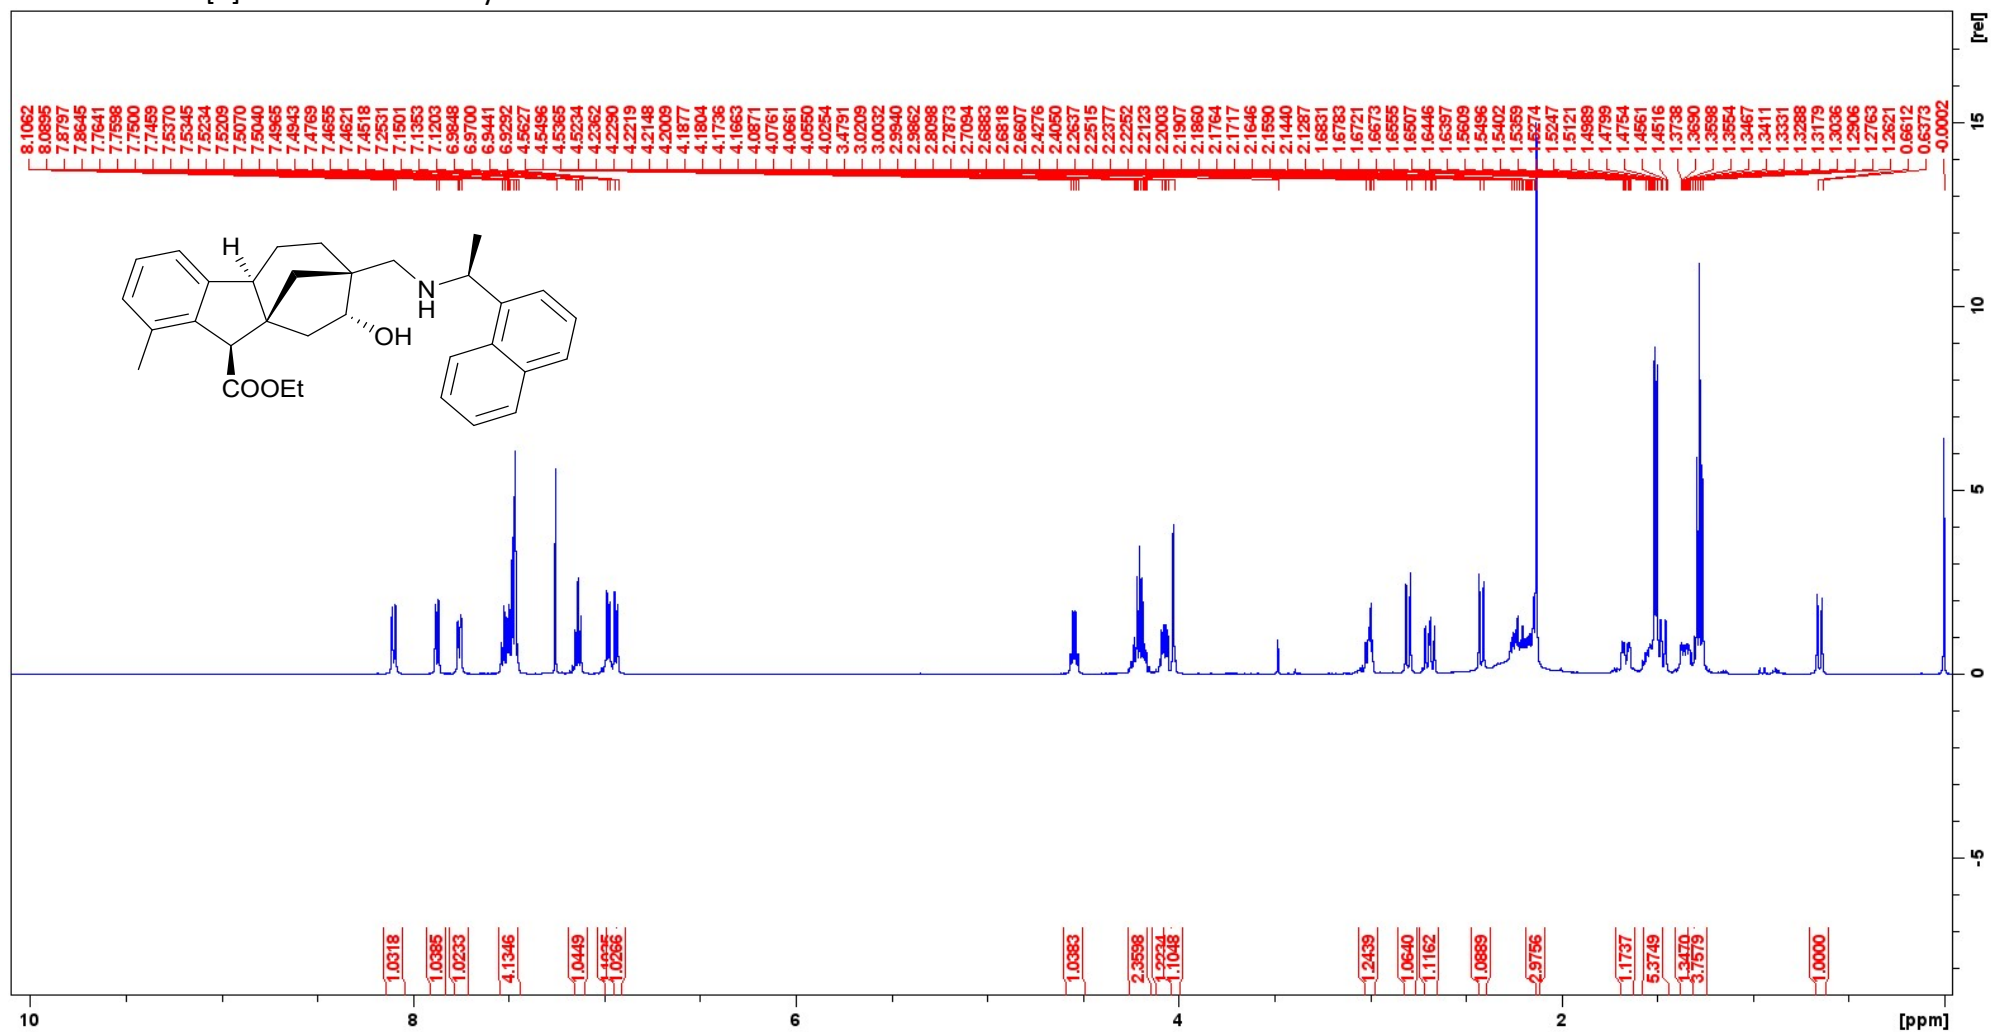

$^{13}\text{C}$ -NMR of ethyl (4*S*,7*S*,8*R*,9*aS*,10*R*)-8-hydroxy-1-methyl-7-(((*S*)-1-(naphthalen-1-yl)ethyl)amino)methyl)-4*b*,6,7,8,9,10-hexahydro-5*H*-7,9*a*-methanobenzo[*a*]azulene-10-carboxylate **28**

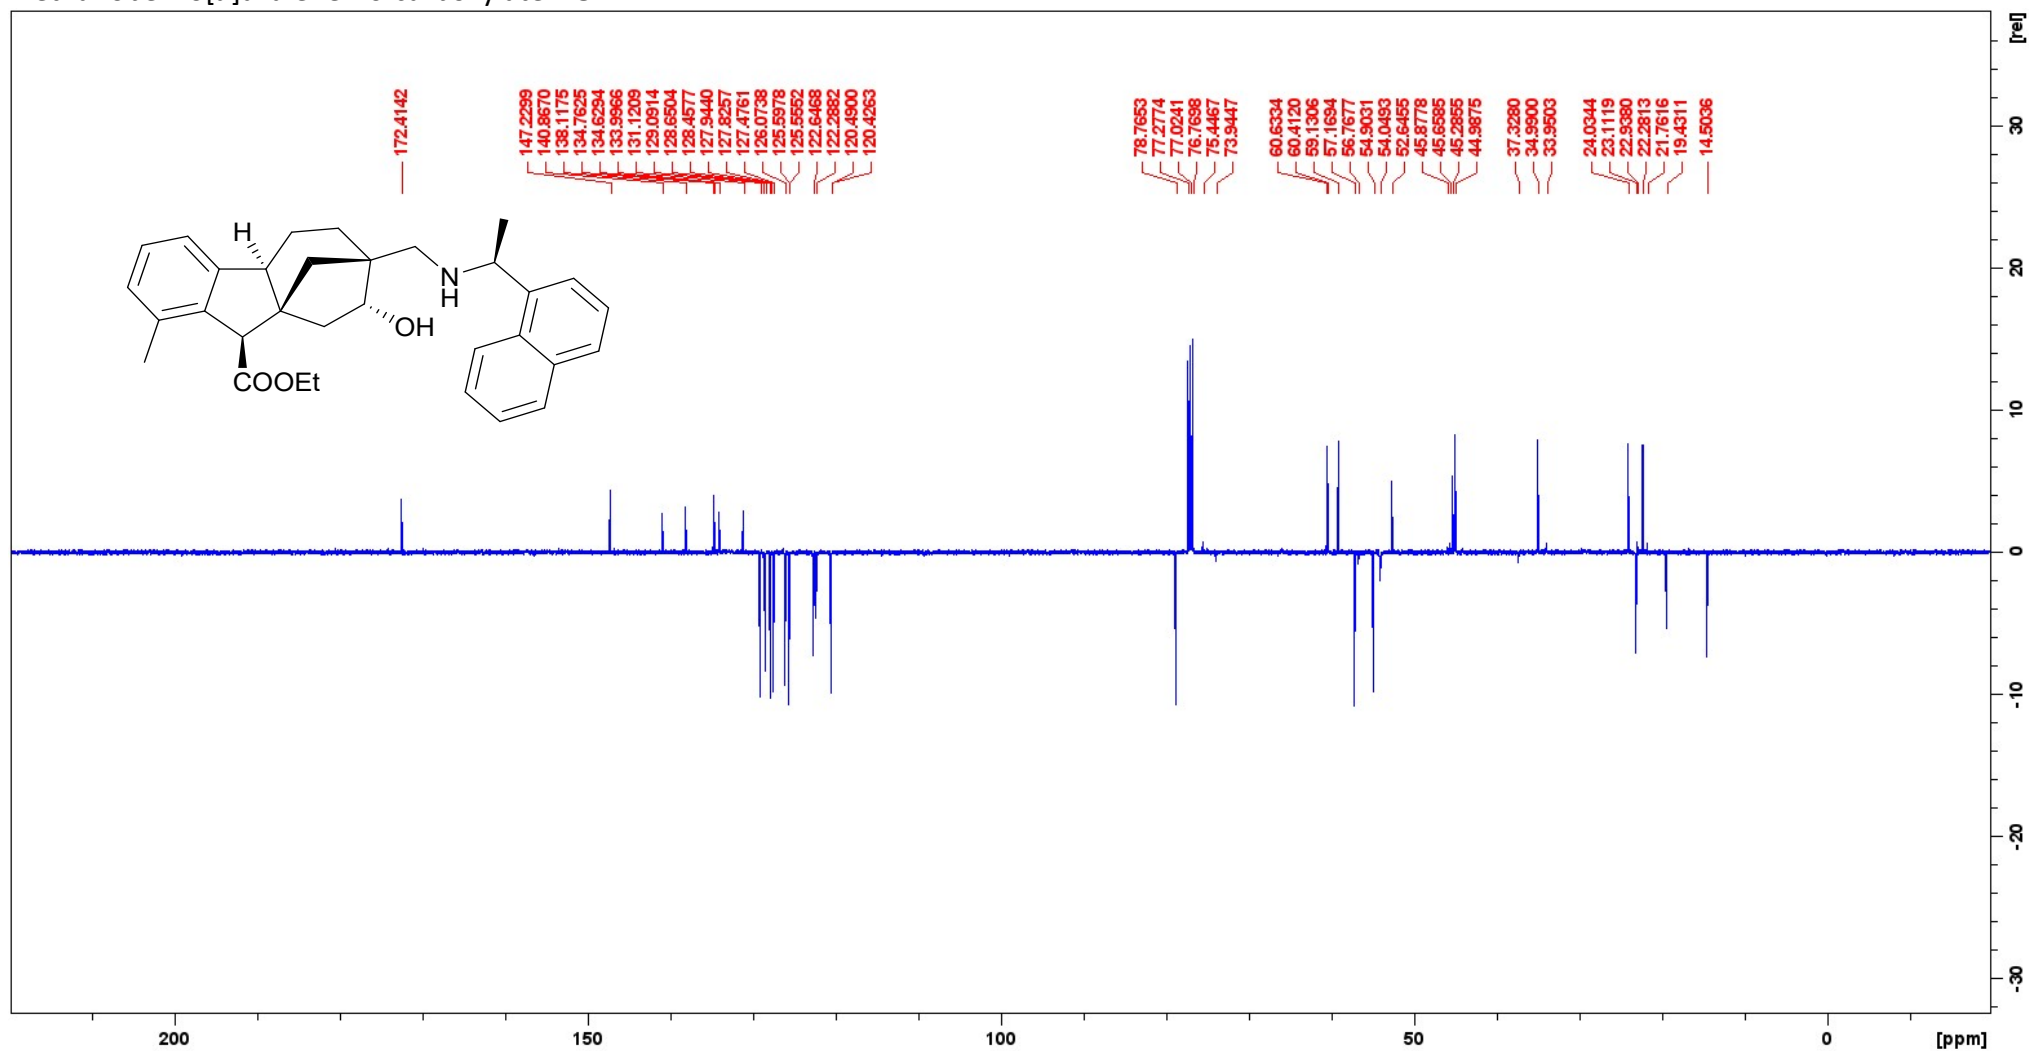

COSY of ethyl (4*S*,7*S*,8*R*,9*aS*,10*R*)-8-hydroxy-1-methyl-7-(((*S*)-1-(naphthalen-1-yl)ethyl)amino)methyl)-4*b*,6,7,8,9,10-hexahydro-5*H*-7,9*a*-methanobenzo[*a*]azulene-10-carboxylate **28**

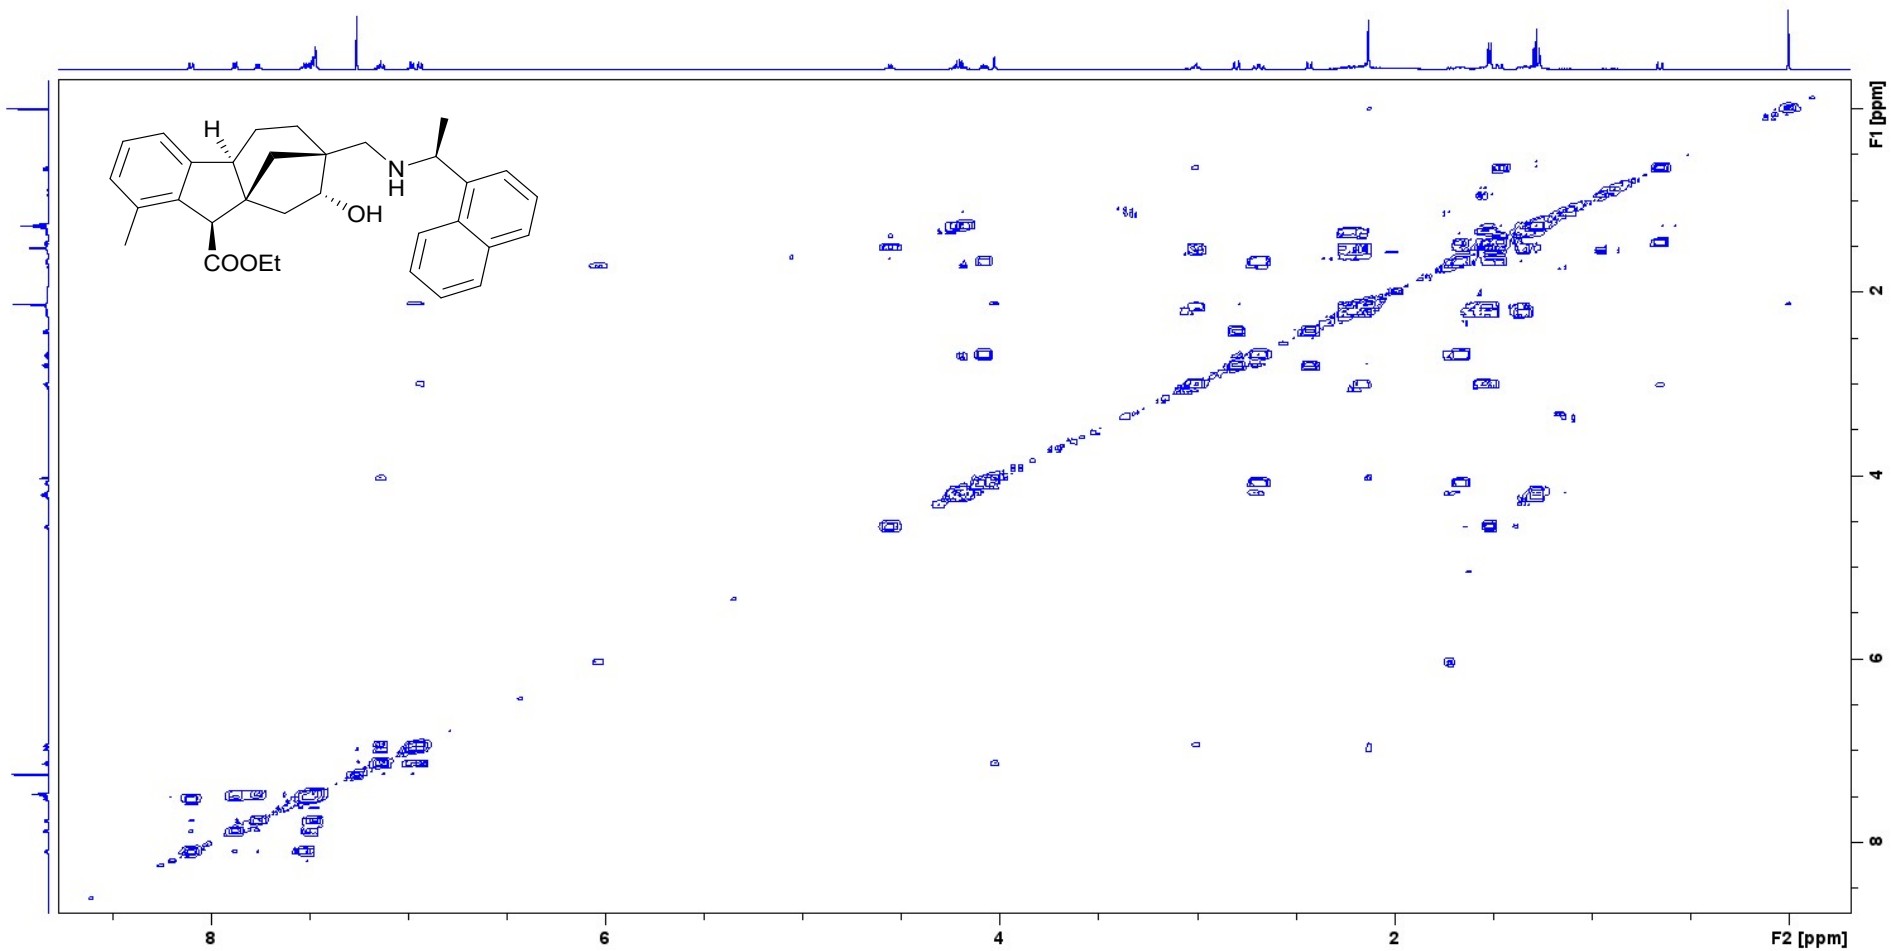



NOESY of ethyl (4*b**S*,7*S*,8*R*,9*a**S*,10*R*)-8-hydroxy-1-methyl-7-(((*S*)-1-(naphthalen-1-yl)ethyl)amino)methyl)-4*b*,6,7,8,9,10-hexahydro-5*H*-7,9*a*-methanobenzo[*a*]azulene-10-carboxylate 28

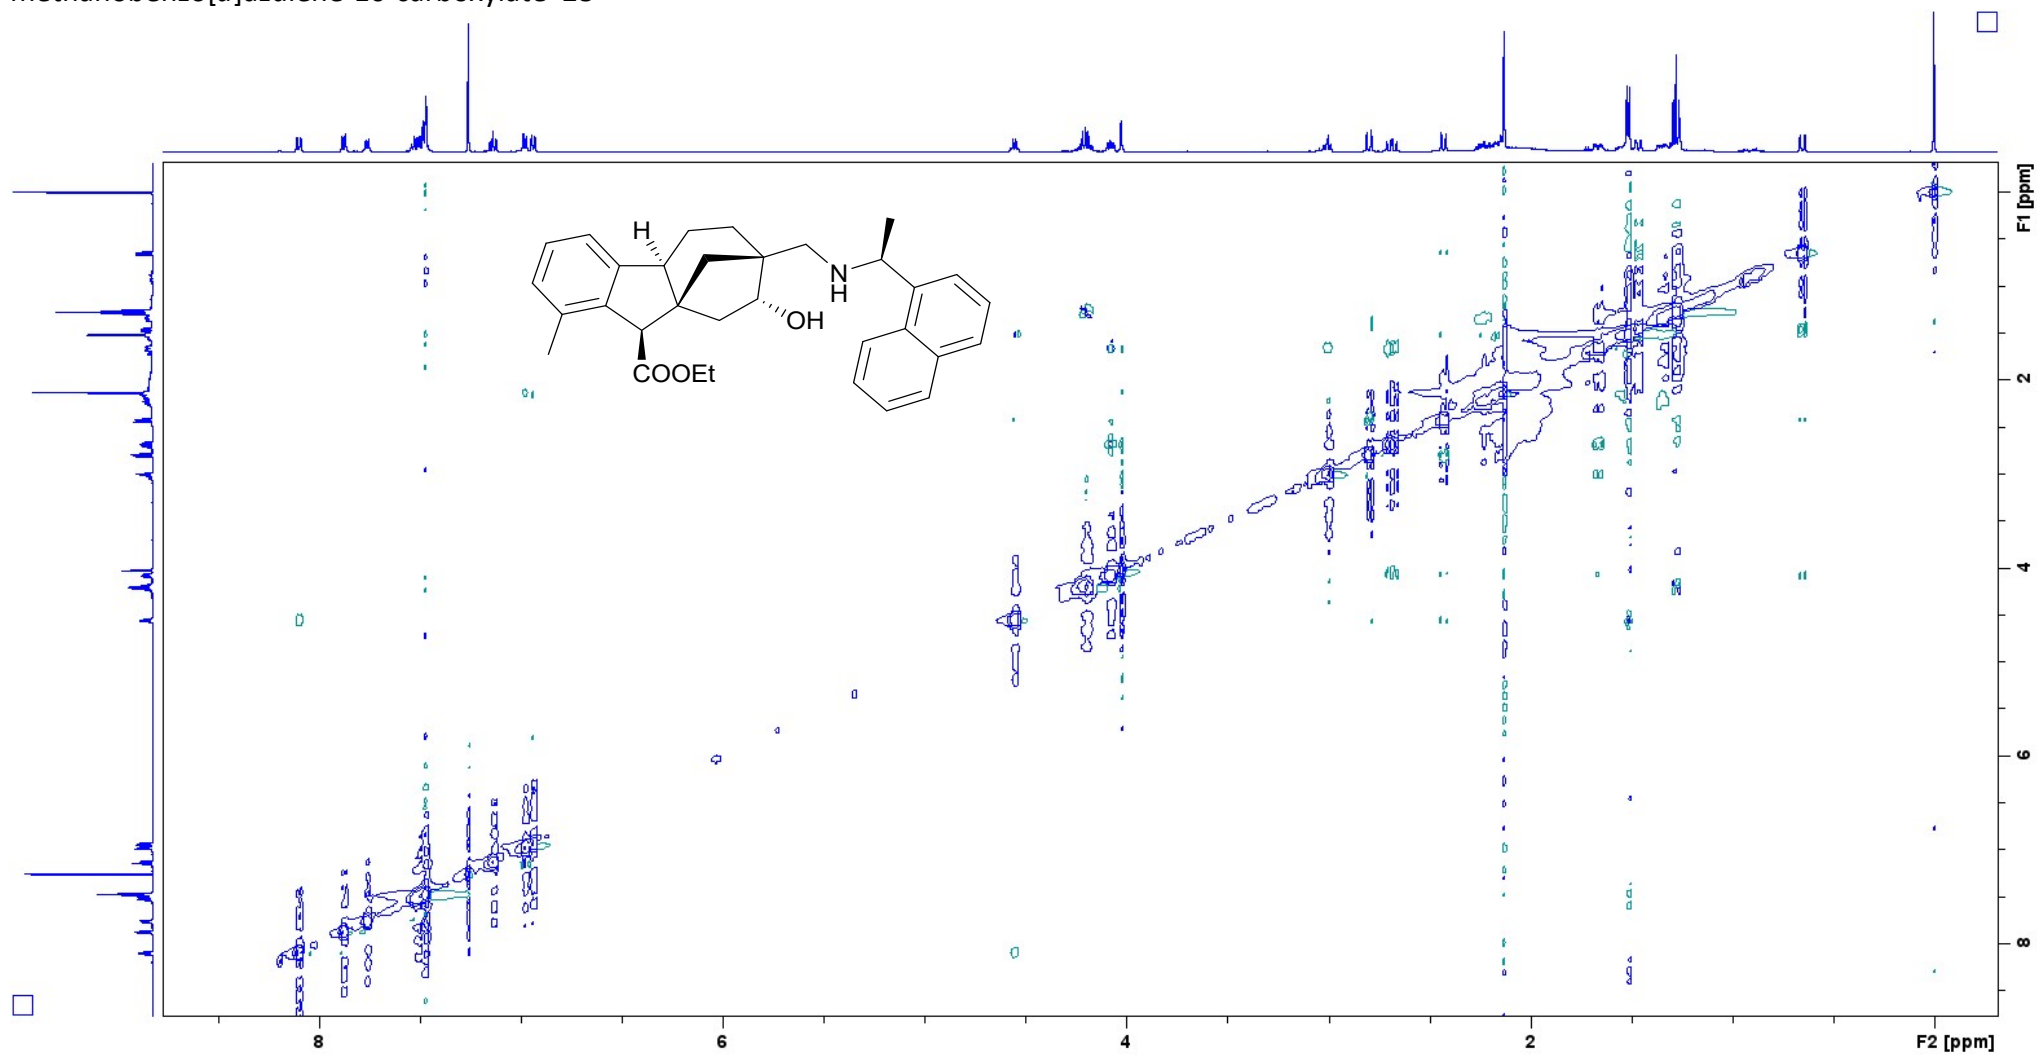

HSQC of ethyl (4*S*,7*S*,8*R*,9*aS*,10*R*)-8-hydroxy-1-methyl-7-(((*S*)-1-(naphthalen-1-yl)ethyl)amino)methyl)-4*b*,6,7,8,9,10-hexahydro-5*H*-7,9a-methanobenzo[*a*]azulene-10-carboxylate 28

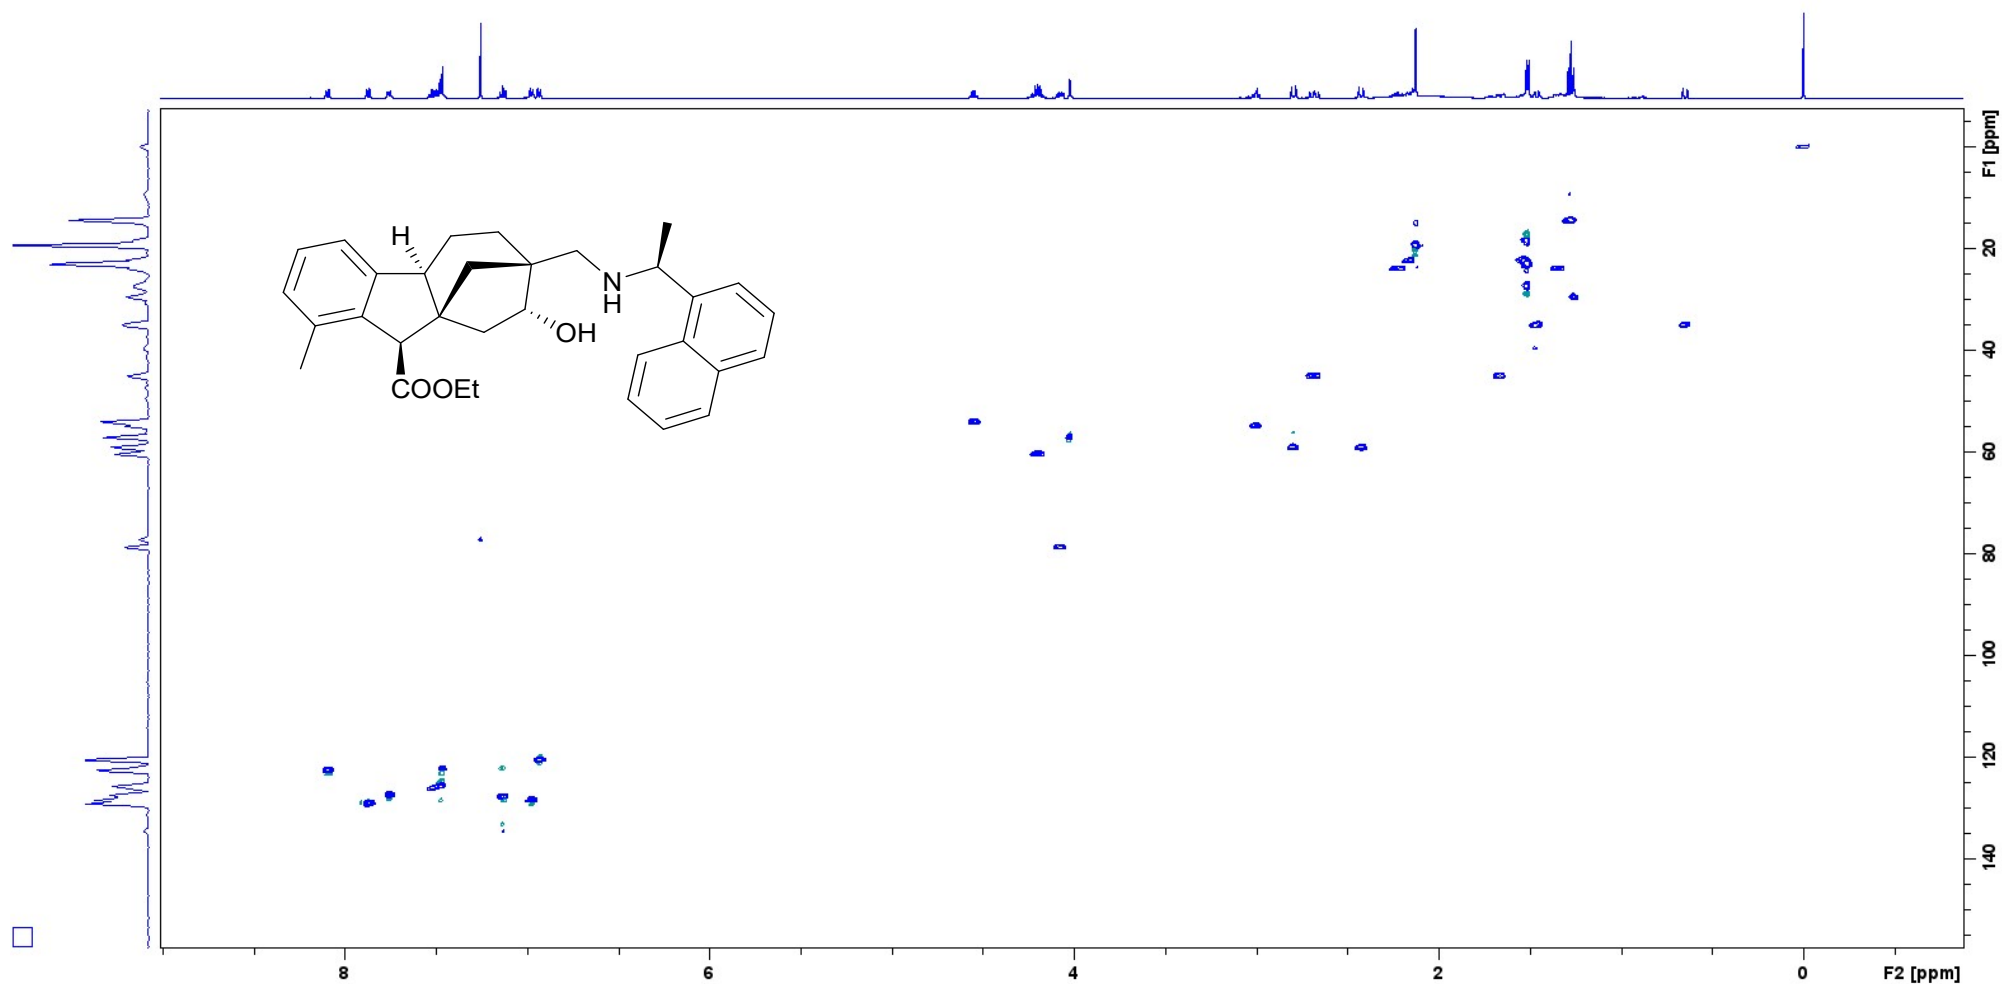

HMBC of ethyl (4*S*,7*S*,8*R*,9*aS*,10*R*)-8-hydroxy-1-methyl-7-(((*S*)-1-(naphthalen-1-yl)ethyl)amino)methyl)-4*b*,6,7,8,9,10-hexahydro-5*H*-7,9a-methanobenzo[*a*]azulene-10-carboxylate **28**

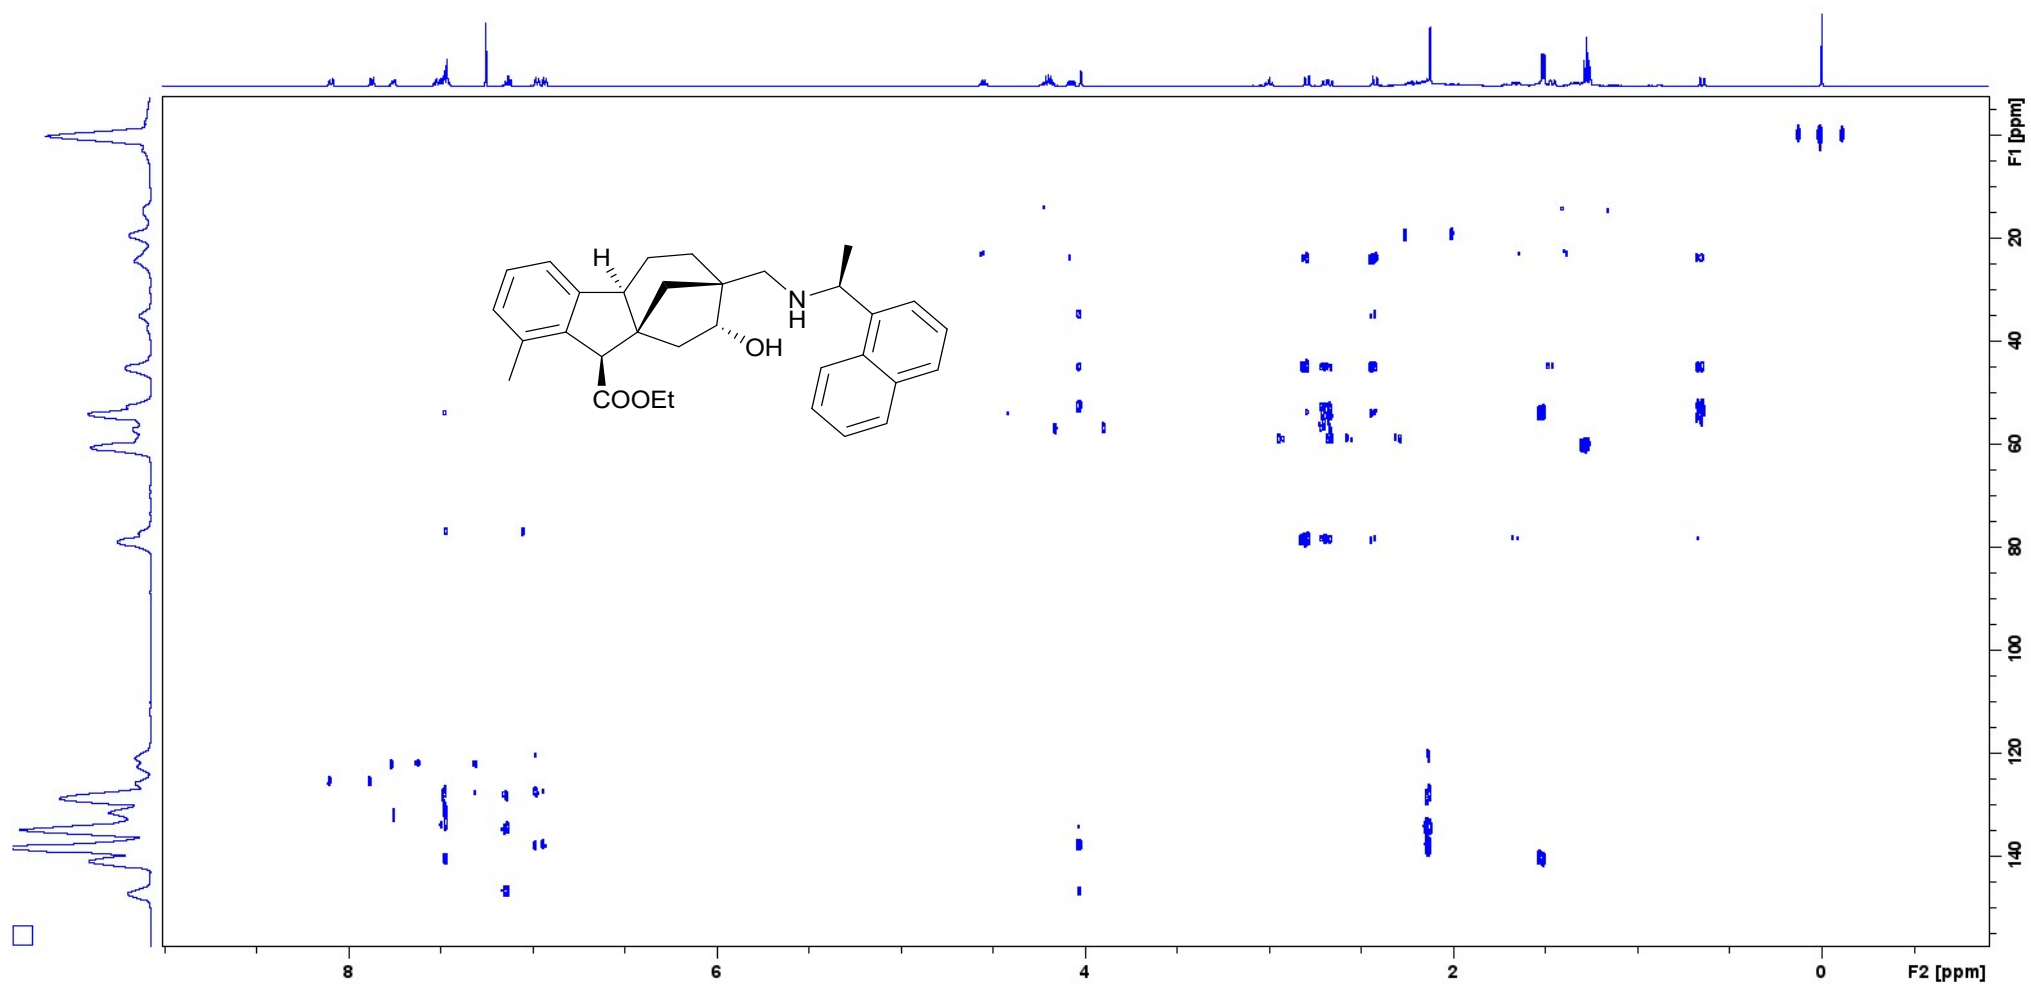

<sup>1</sup>H-NMR of ethyl (4*bS*,7*S*,8*R*,9*aS*,10*R*)-8-hydroxy-1-methyl-7-(((*R*)-1-(naphthalen-1-yl)ethyl)amino)methyl)-4*b*,6,7,8,9,10-hexahydro-5*H*-7,9a-methanobenzo[*a*]azulene-10-carboxylate **29**

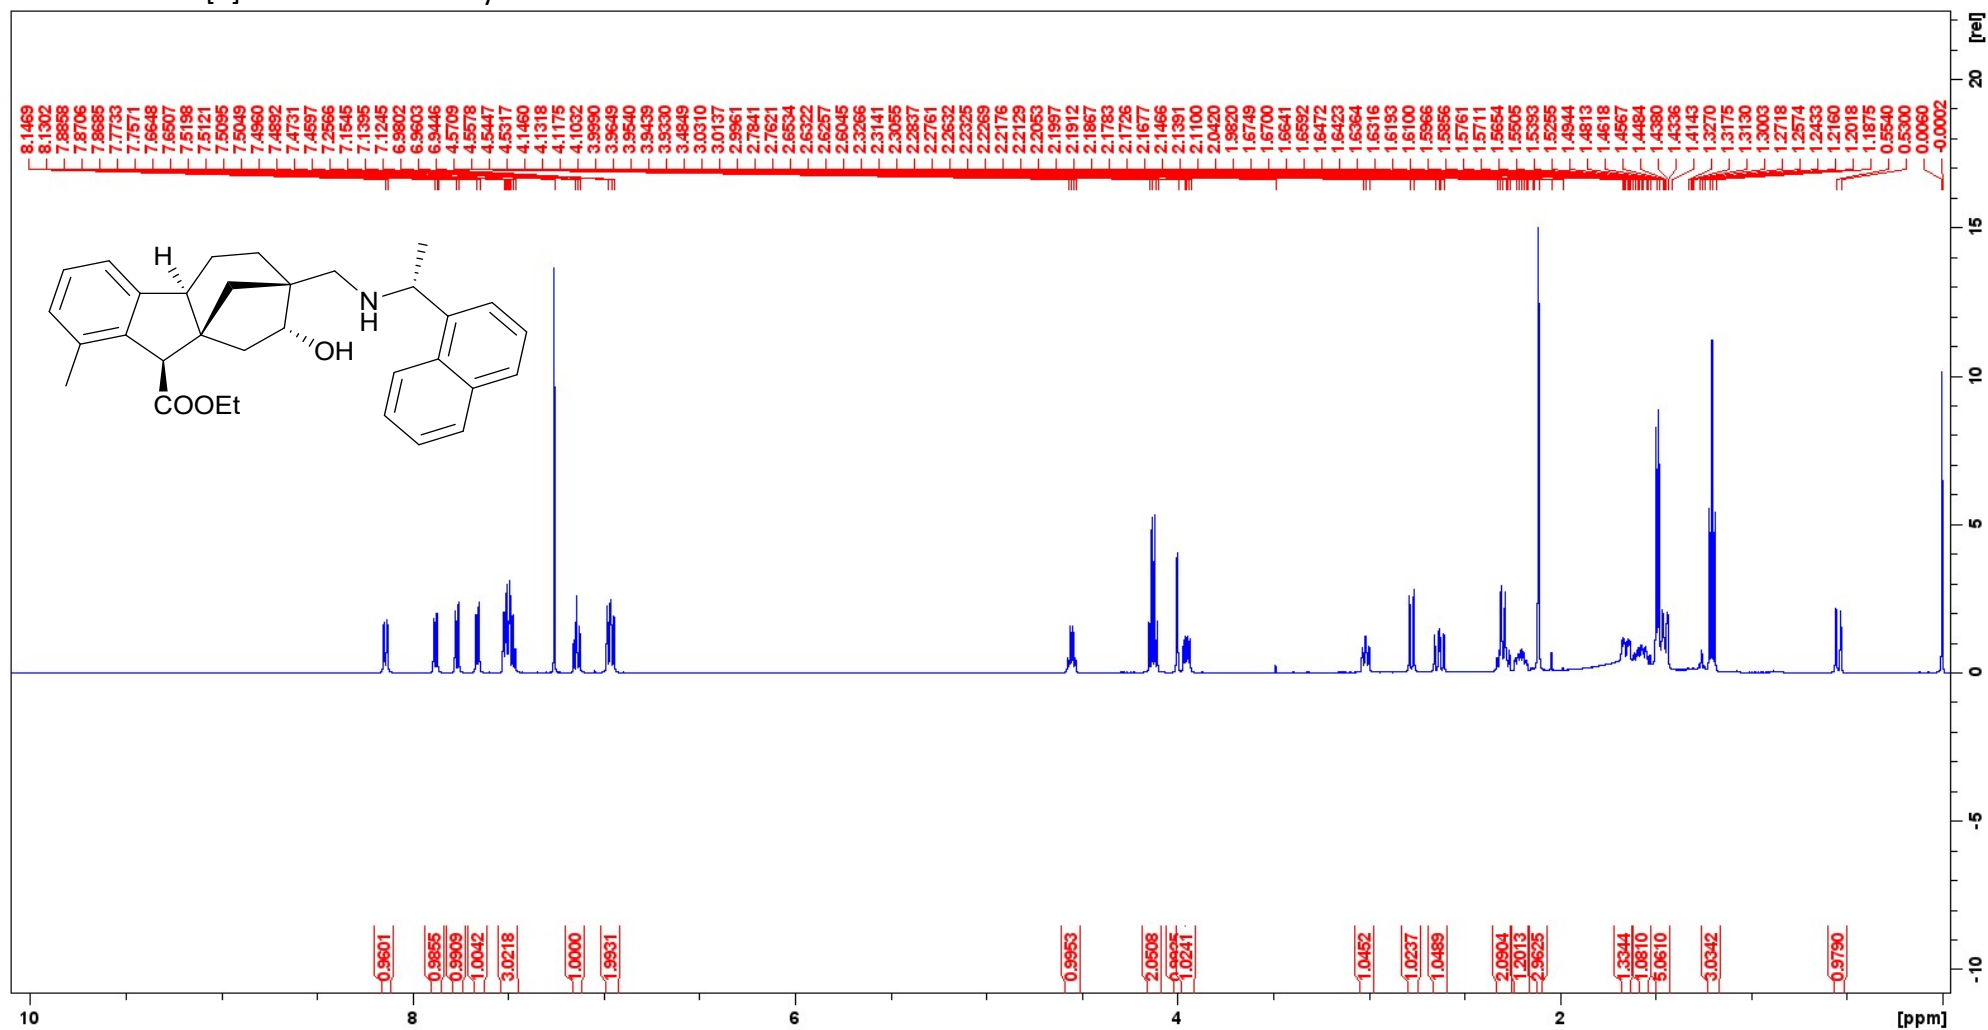

<sup>13</sup>C-NMR of ethyl (4*S*,7*S*,8*R*,9*aS*,10*R*)-8-hydroxy-1-methyl-7-(((*R*)-1-(naphthalen-1-yl)ethyl)amino)methyl)-4*b*,6,7,8,9,10-hexahydro-5*H*-7,9*a*-methanobenzo[*a*]azulene-10-carboxylate **29**

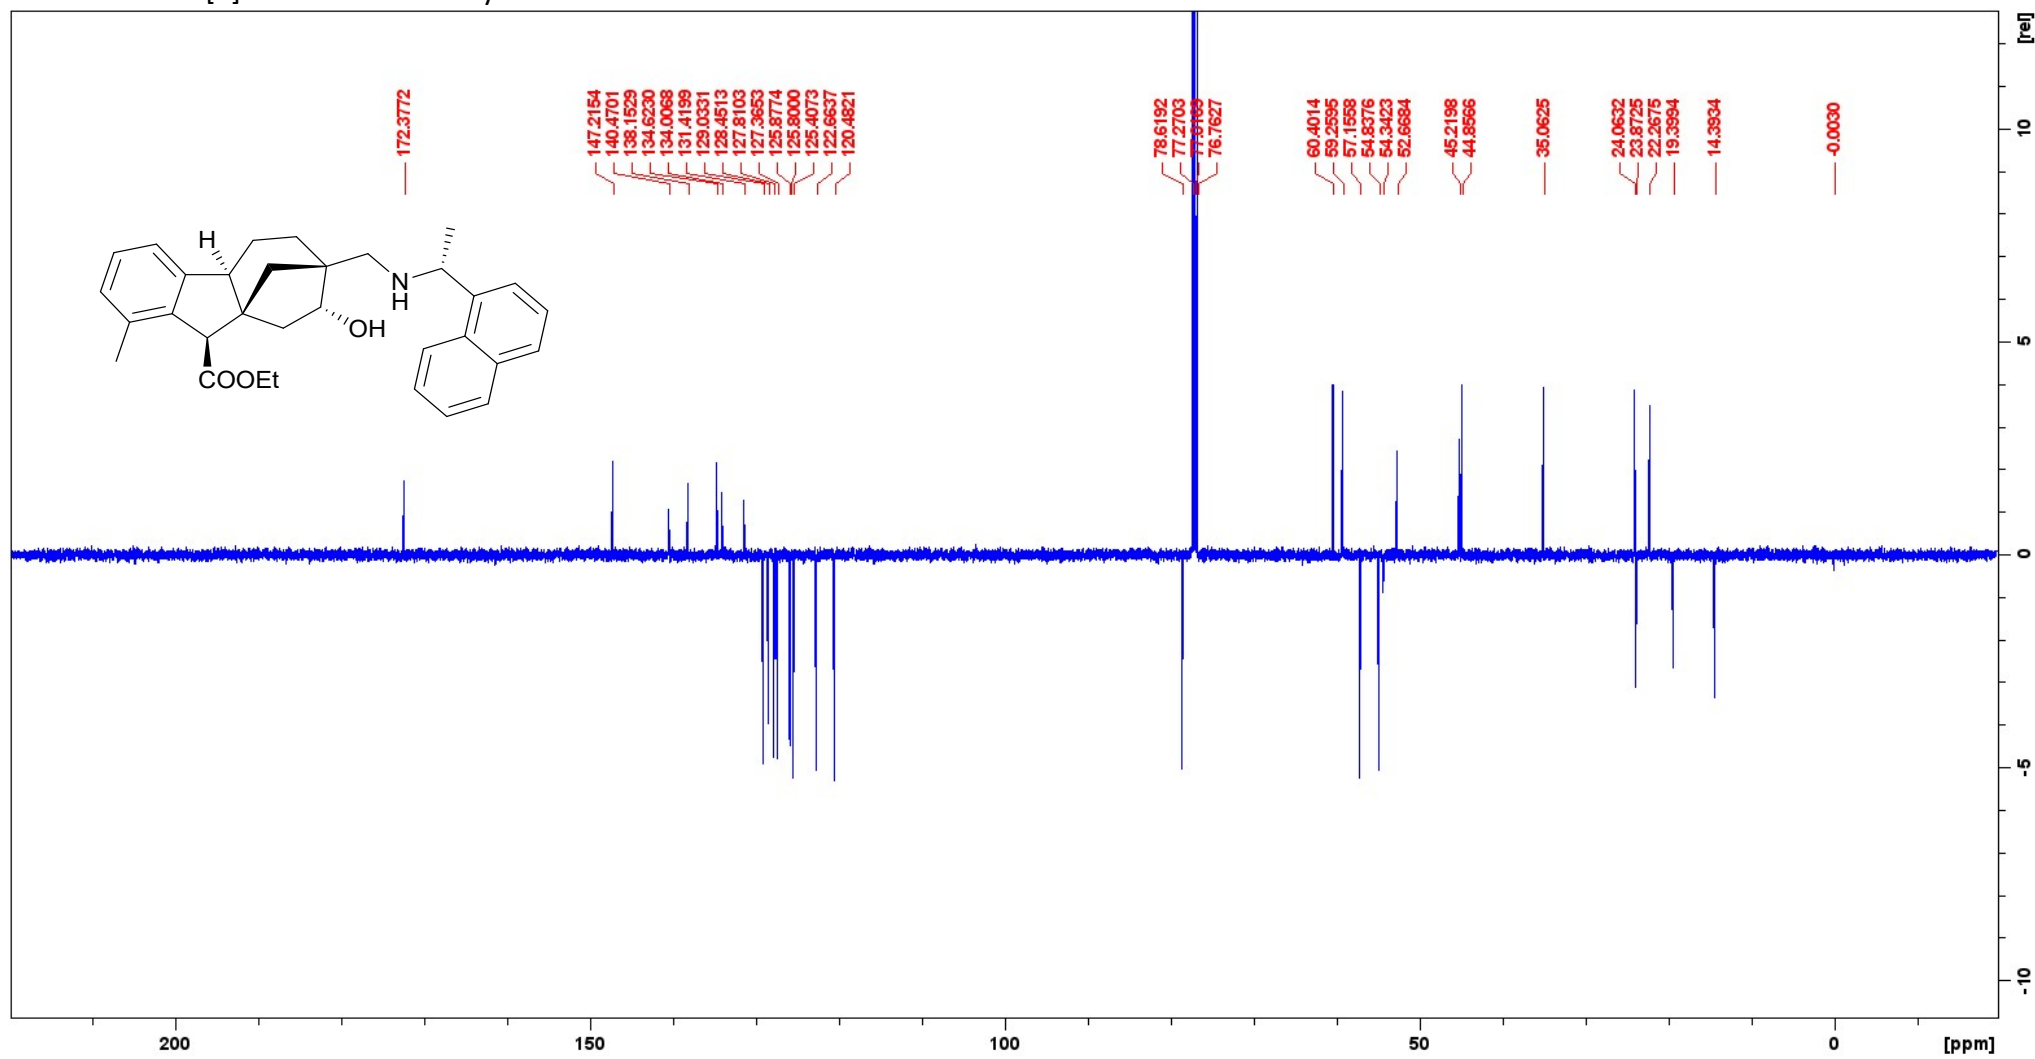

<sup>1</sup>H-NMR of Ethyl (4*S*,7*S*,8*R*,9*aS*,10*R*)-8-hydroxy-1-methyl-7-((4-phenyl-1*H*-1,2,3-triazol-1-yl)methyl)-4*b*,6,7,8,9,10-hexahydro-5*H*-7,9*a*-methanobenzo[*a*]azulene-10-carboxylate **38**

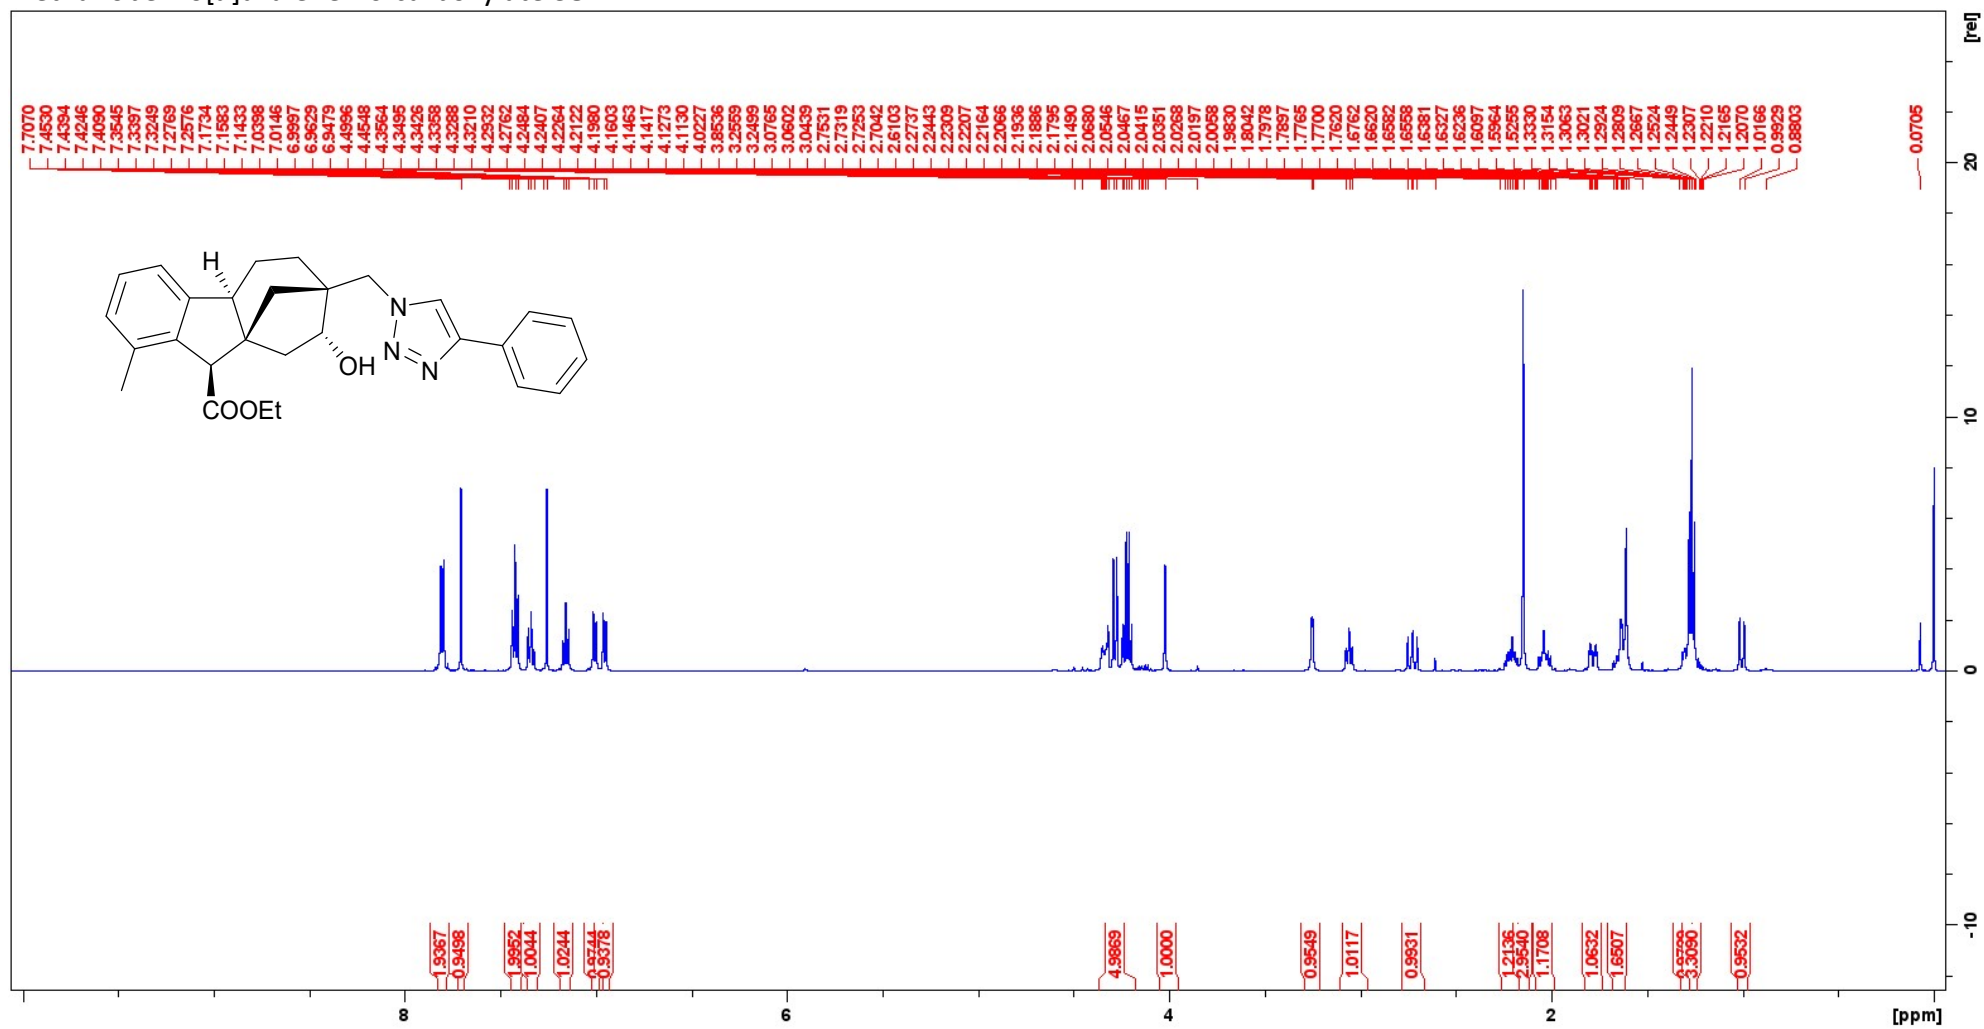

<sup>13</sup>C-NMR of Ethyl (4*b*S,7*S*,8*R*,9*a*S,10*R*)-8-hydroxy-1-methyl-7-((4-phenyl-1*H*-1,2,3-triazol-1-yl)methyl)-4*b*,6,7,8,9,10-hexahydro-5*H*-7,9*a*-methanobenzo[*a*]azulene-10-carboxylate **38**

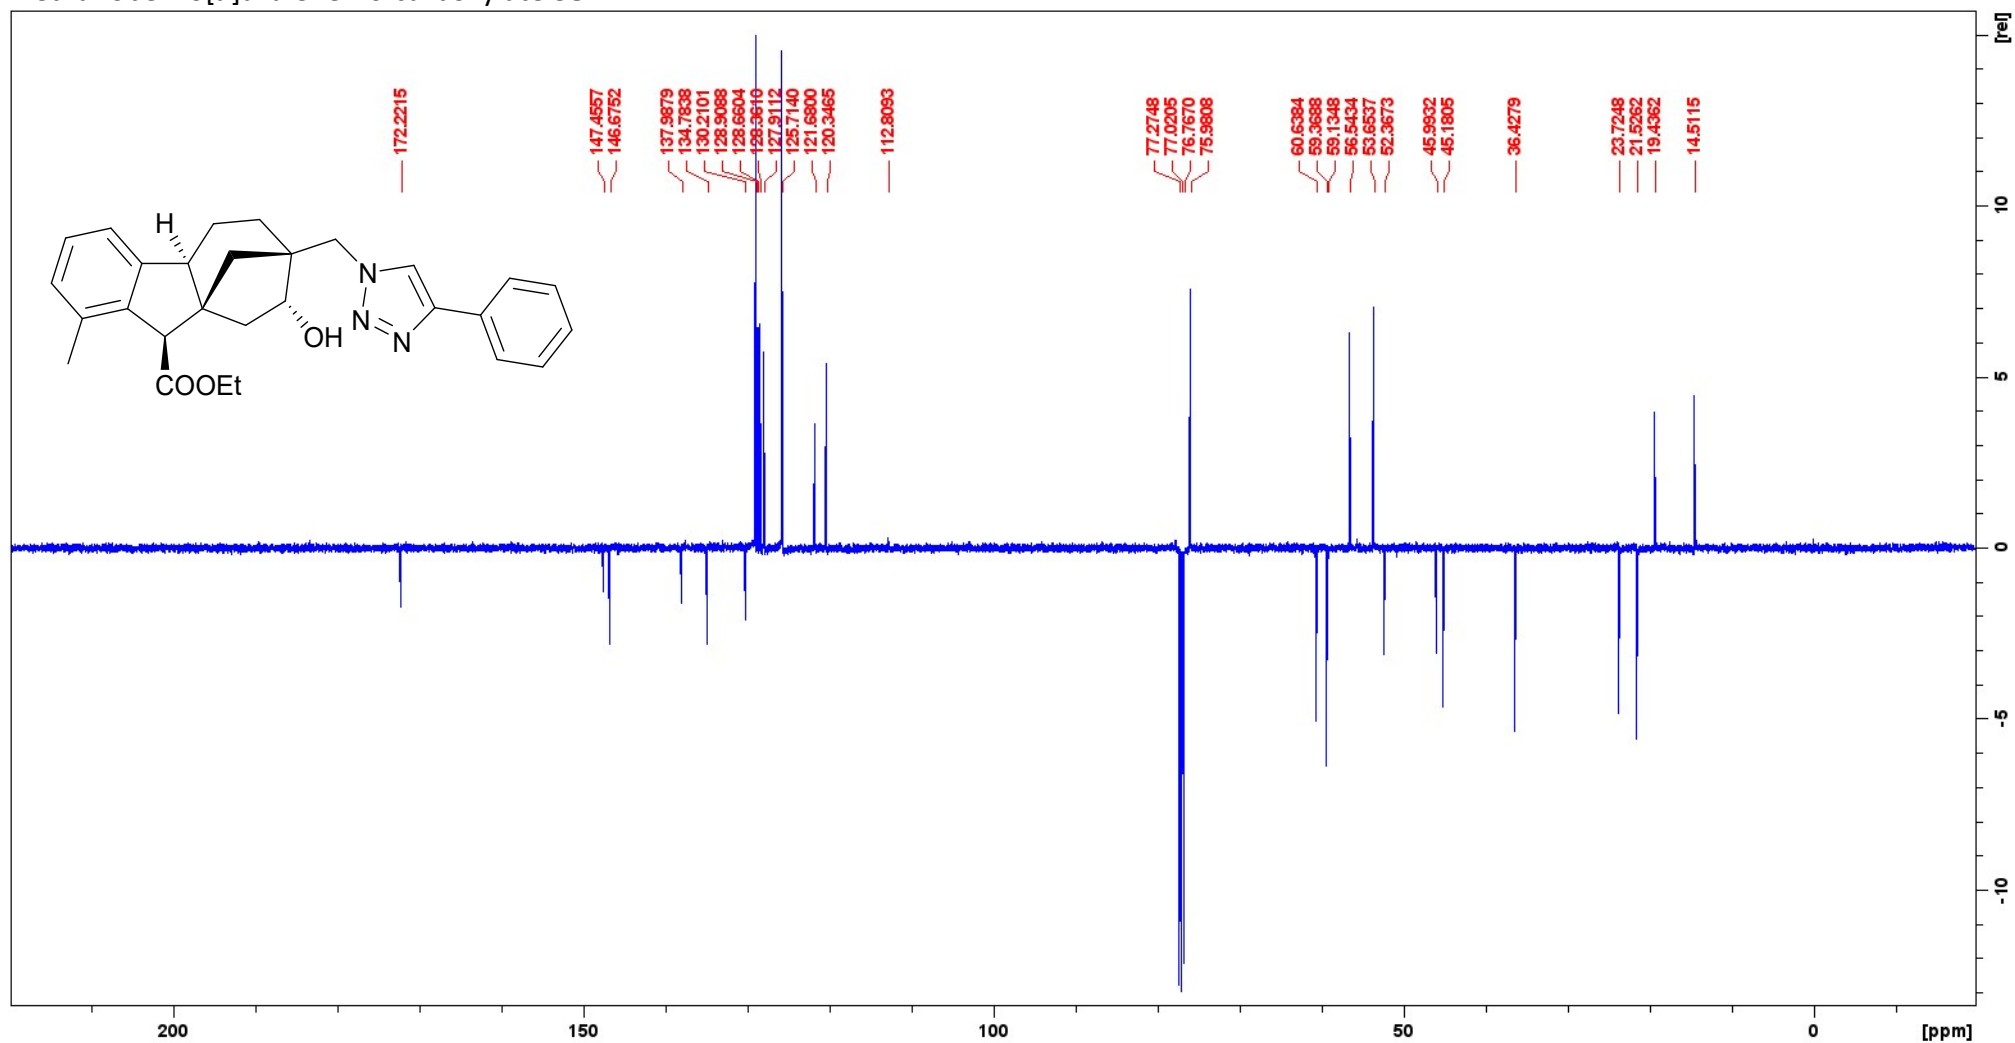

COSY of Ethyl (4*S*,7*S*,8*R*,9*aS*,10*R*)-8-hydroxy-1-methyl-7-((4-phenyl-1*H*-1,2,3-triazol-1-yl)methyl)-4*b*,6,7,8,9,10-hexahydro-5*H*-7,9*a*-methanobenzo[*a*]azulene-10-carboxylate **38**

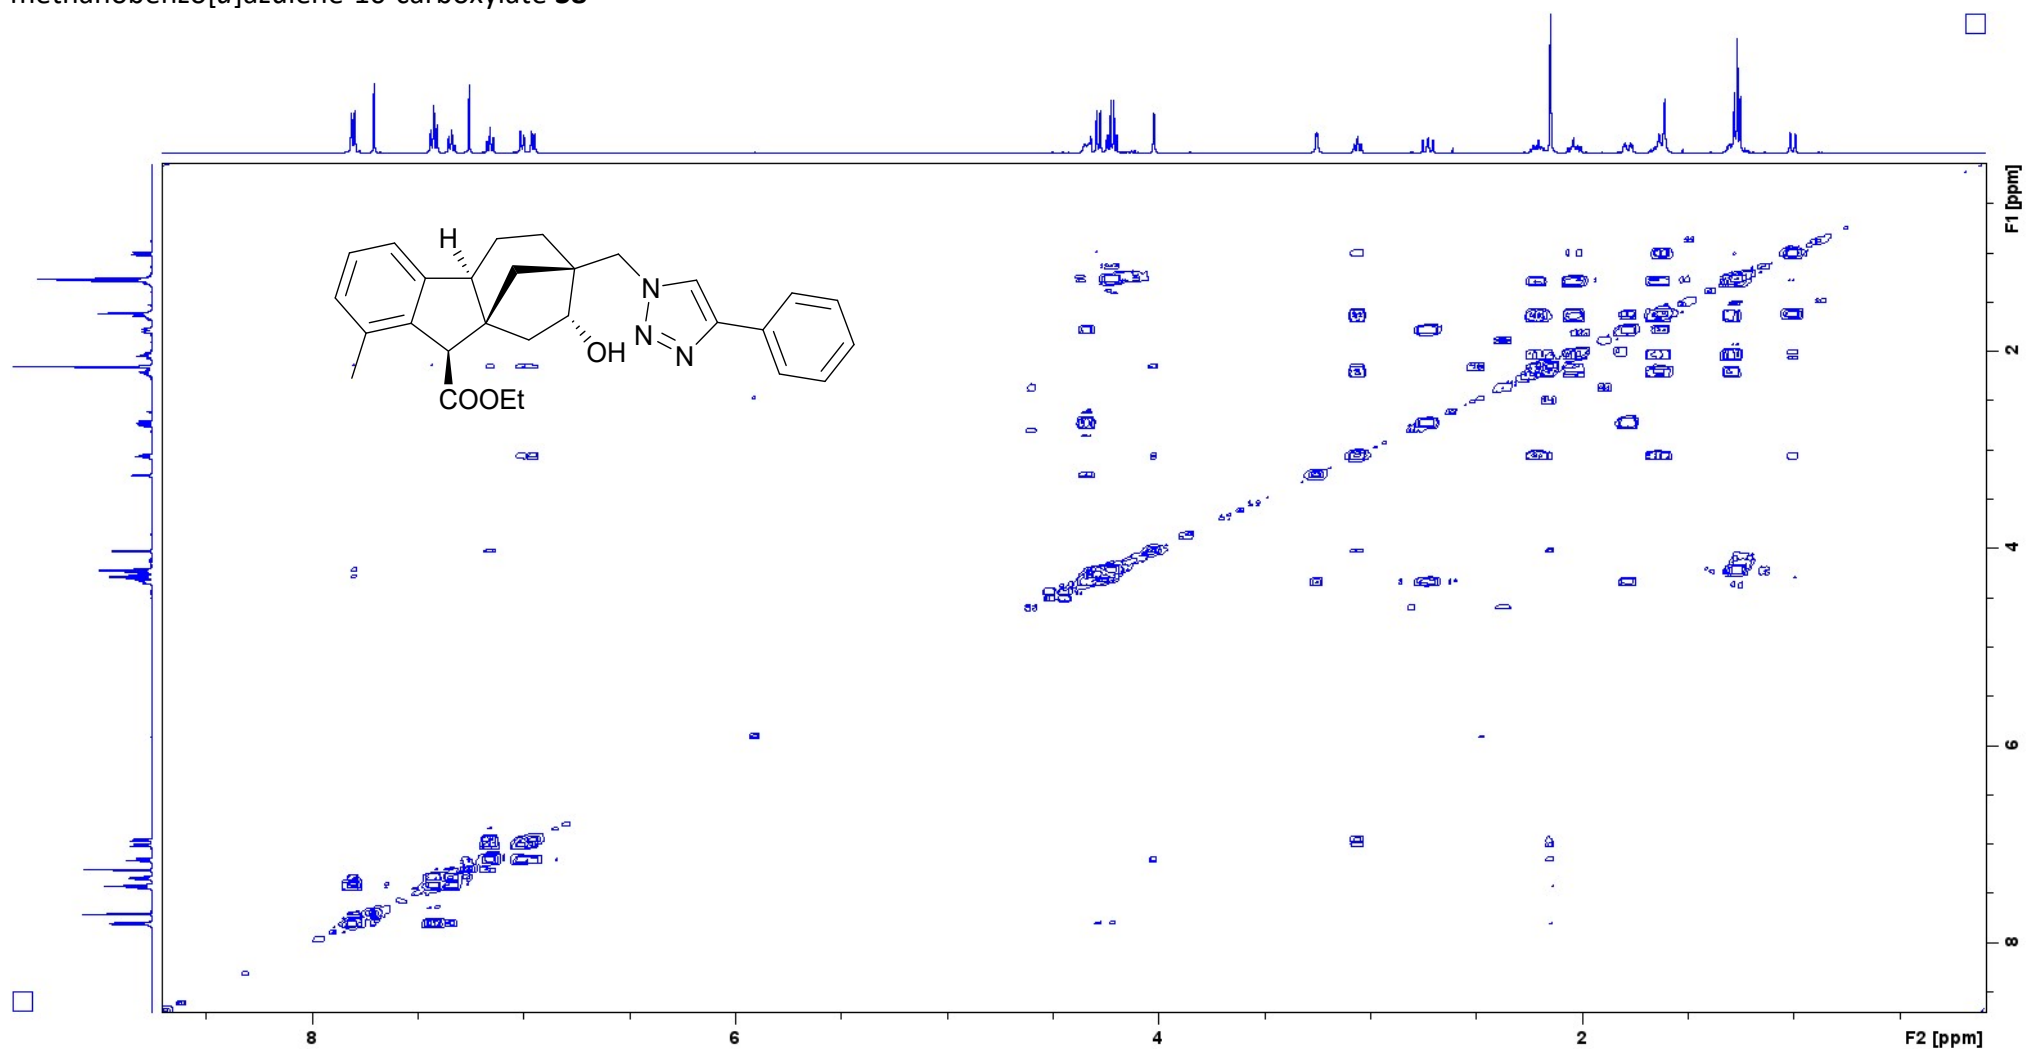



NOESY of Ethyl (4*S*,7*S*,8*R*,9*aS*,10*R*)-8-hydroxy-1-methyl-7-((4-phenyl-1*H*-1,2,3-triazol-1-yl)methyl)-4*b*,6,7,8,9,10-hexahydro-5*H*-7,9*a*-methanobenzo[*a*]azulene-10-carboxylate **38**

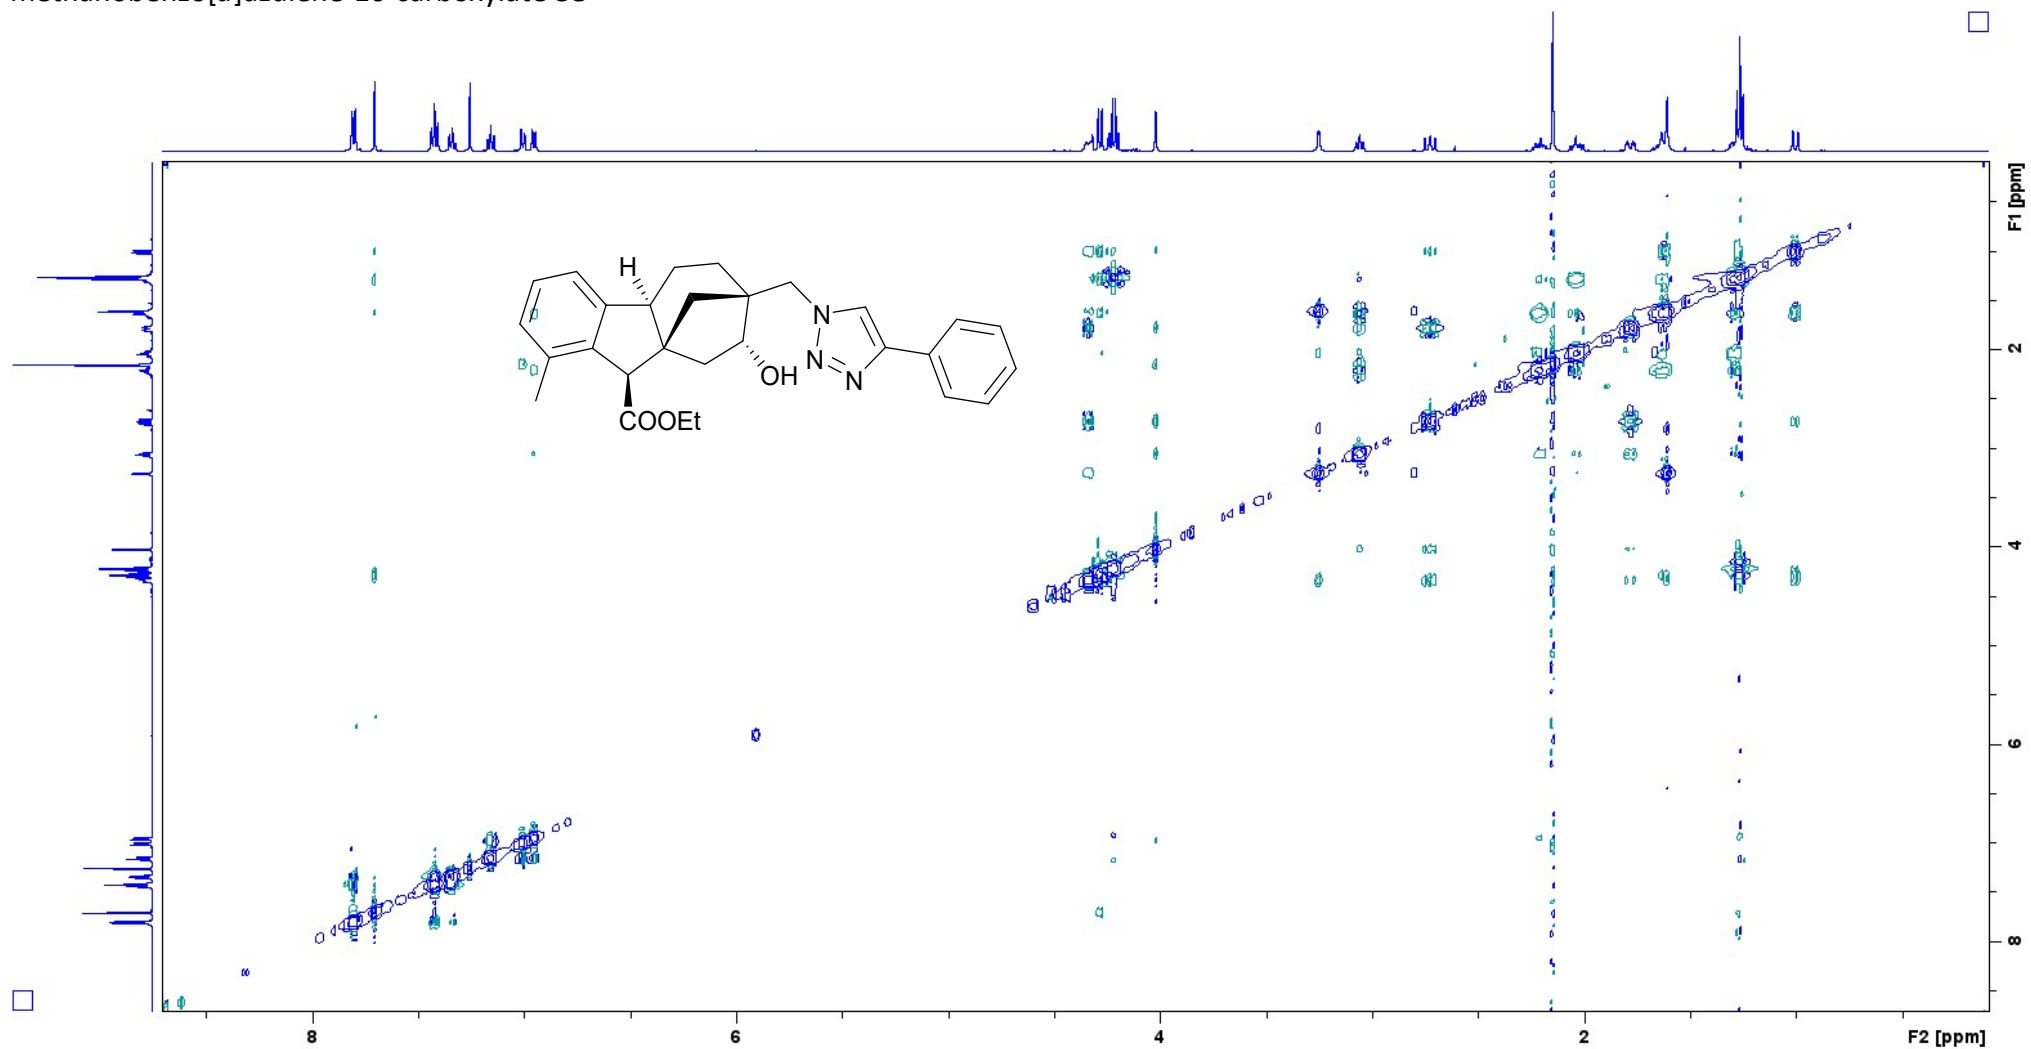

HSQC of Ethyl (4*S*,7*S*,8*R*,9*aS*,10*R*)-8-hydroxy-1-methyl-7-((4-phenyl-1*H*-1,2,3-triazol-1-yl)methyl)-4*b*,6,7,8,9,10-hexahydro-5*H*-7,9*a*-methanobenzo[*a*]azulene-10-carboxylate **38**

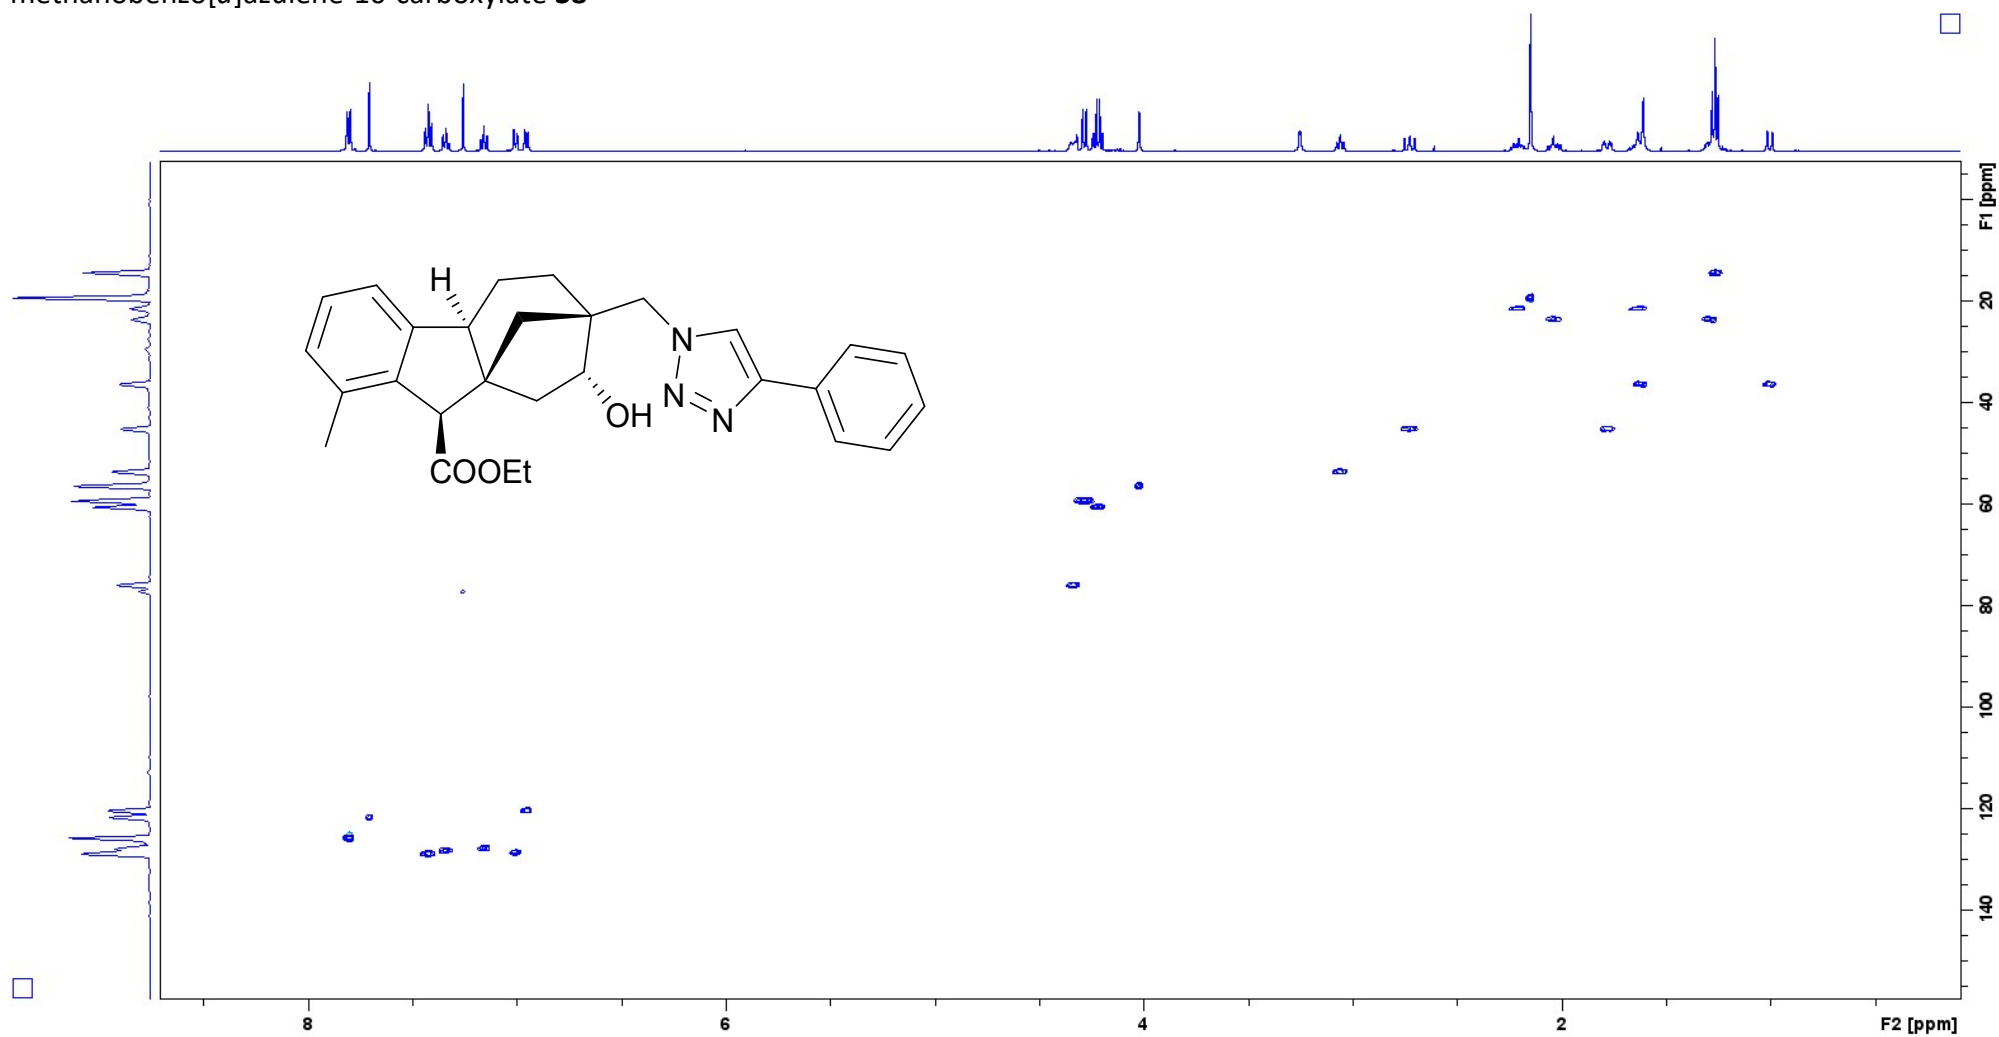

HMBC of Ethyl (4*S*,7*S*,8*R*,9*aS*,10*R*)-8-hydroxy-1-methyl-7-((4-phenyl-1*H*-1,2,3-triazol-1-yl)methyl)-4*b*,6,7,8,9,10-hexahydro-5*H*-7,9*a*-methanobenzo[*a*]azulene-10-carboxylate **38**

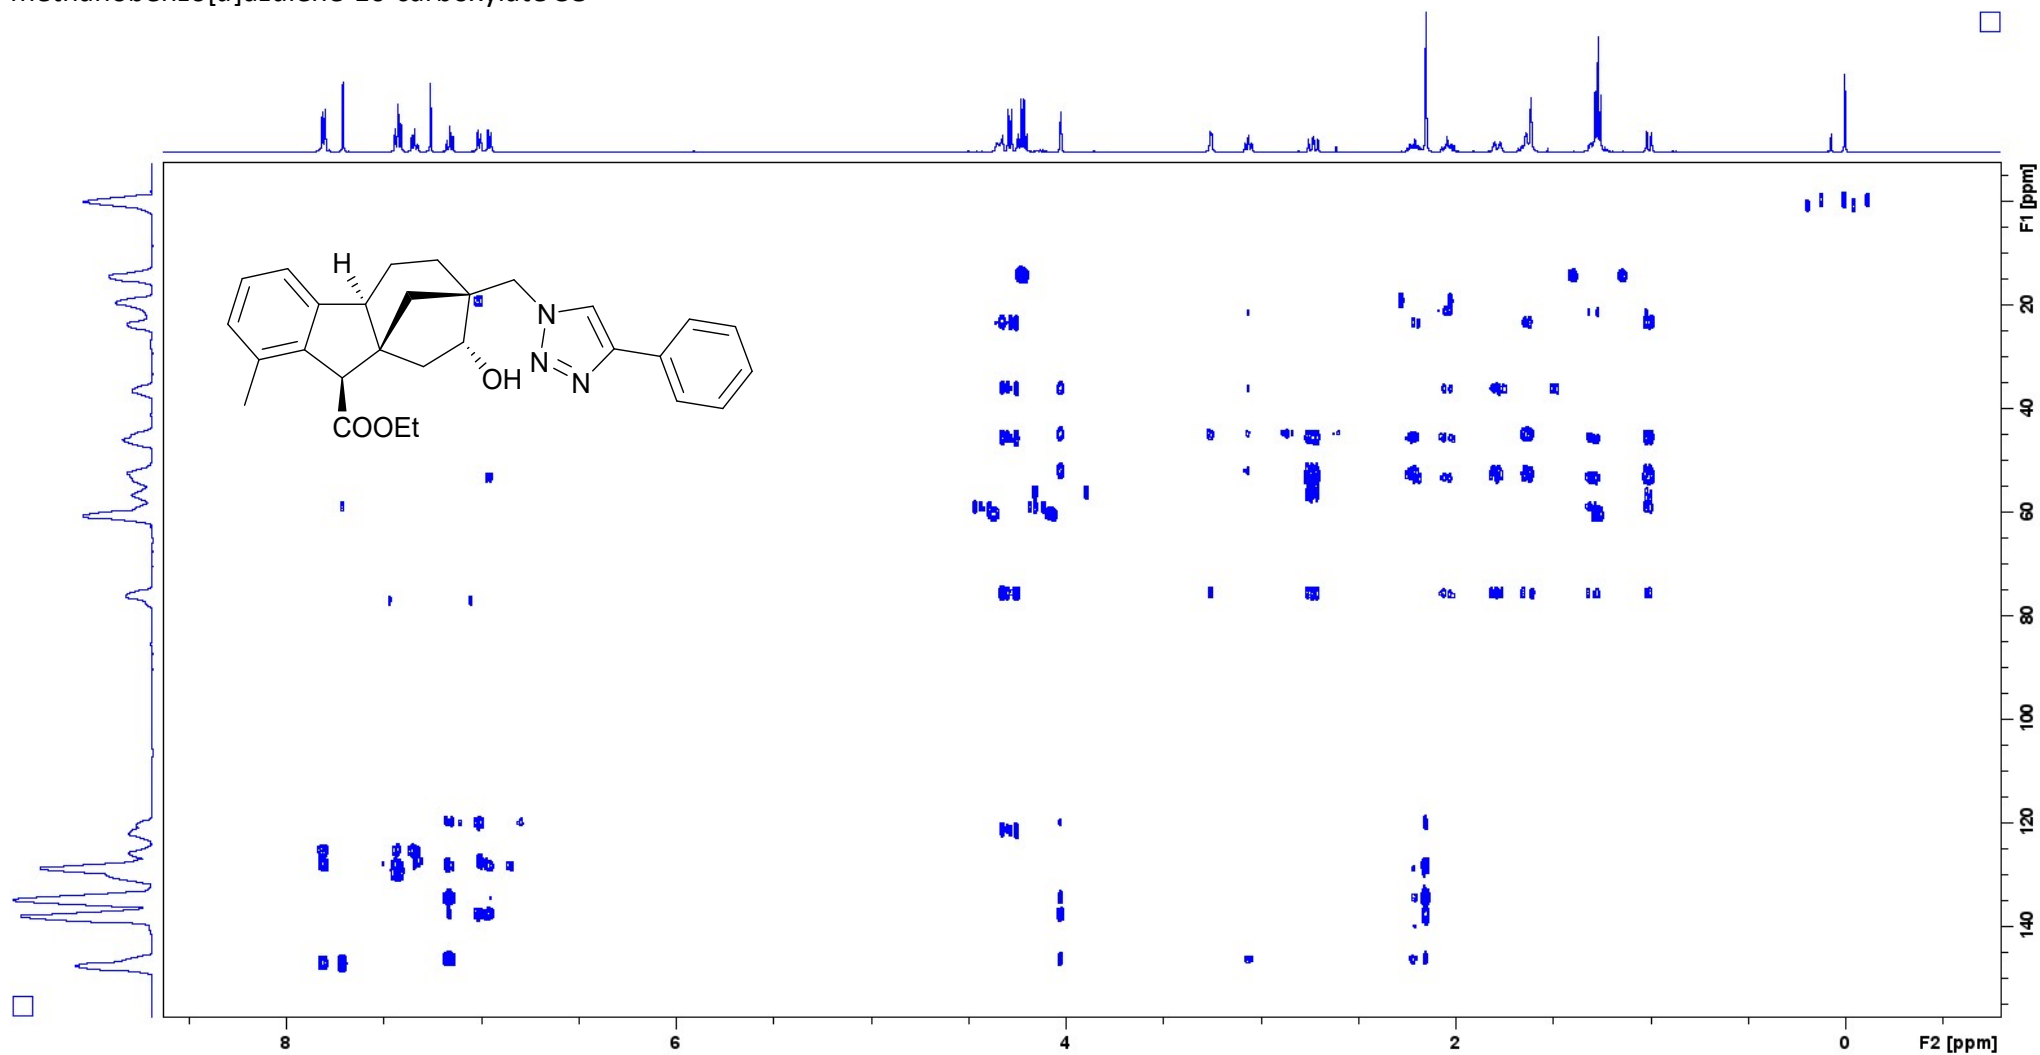

<sup>1</sup>H-NMR of ethyl (4*b**S*,7*S*,8*R*,9*a**S*,10*R*)-7-((4-benzyl-1*H*-1,2,3-triazol-1-yl)methyl)-8-hydroxy-1-methyl-4*b*,6,7,8,9,10-hexahydro-5*H*-7,9*a*-methanobenzo[*a*]azulene-10-carboxylate **39**

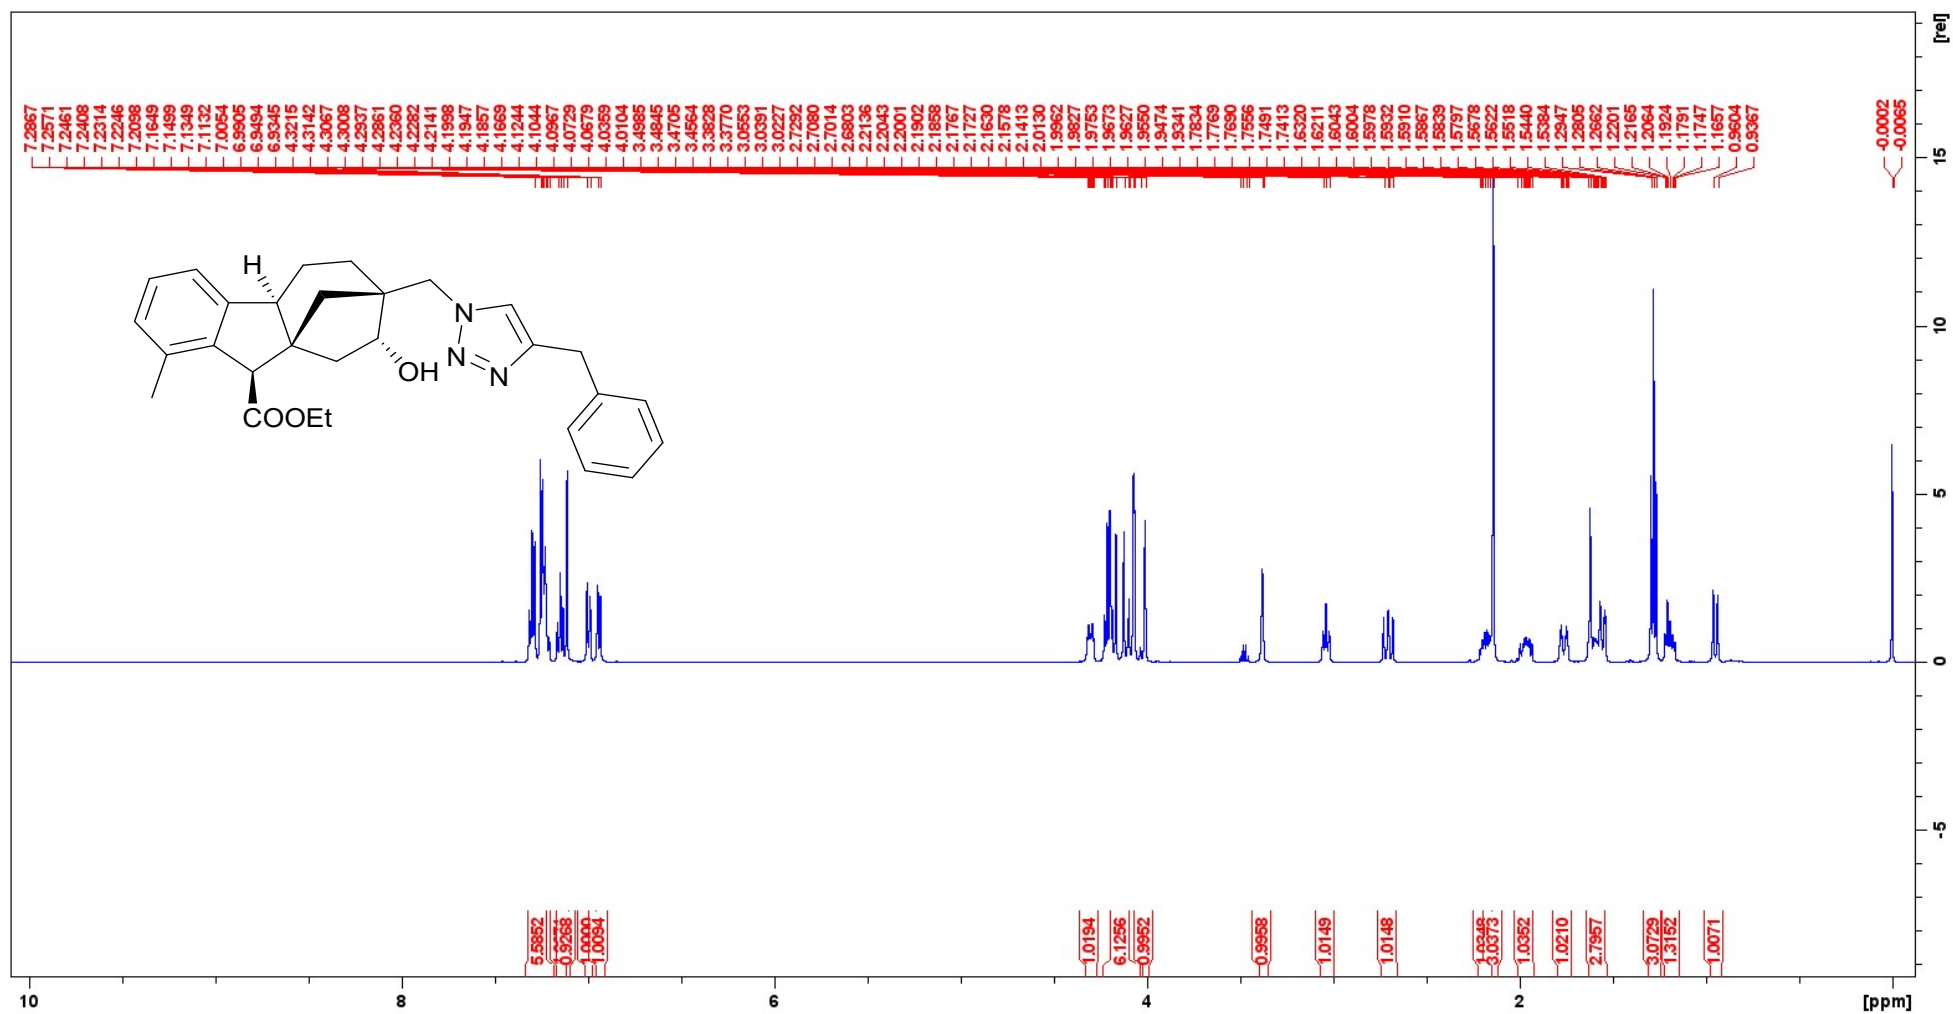

<sup>13</sup>C-NMR of ethyl (4*b**S*,7*S*,8*R*,9*a**S*,10*R*)-7-((4-benzyl-1*H*-1,2,3-triazol-1-yl)methyl)-8-hydroxy-1-methyl-4*b*,6,7,8,9,10-hexahydro-5*H*-7,9*a*-methanobenzo[*a*]azulene-10-carboxylate **39**

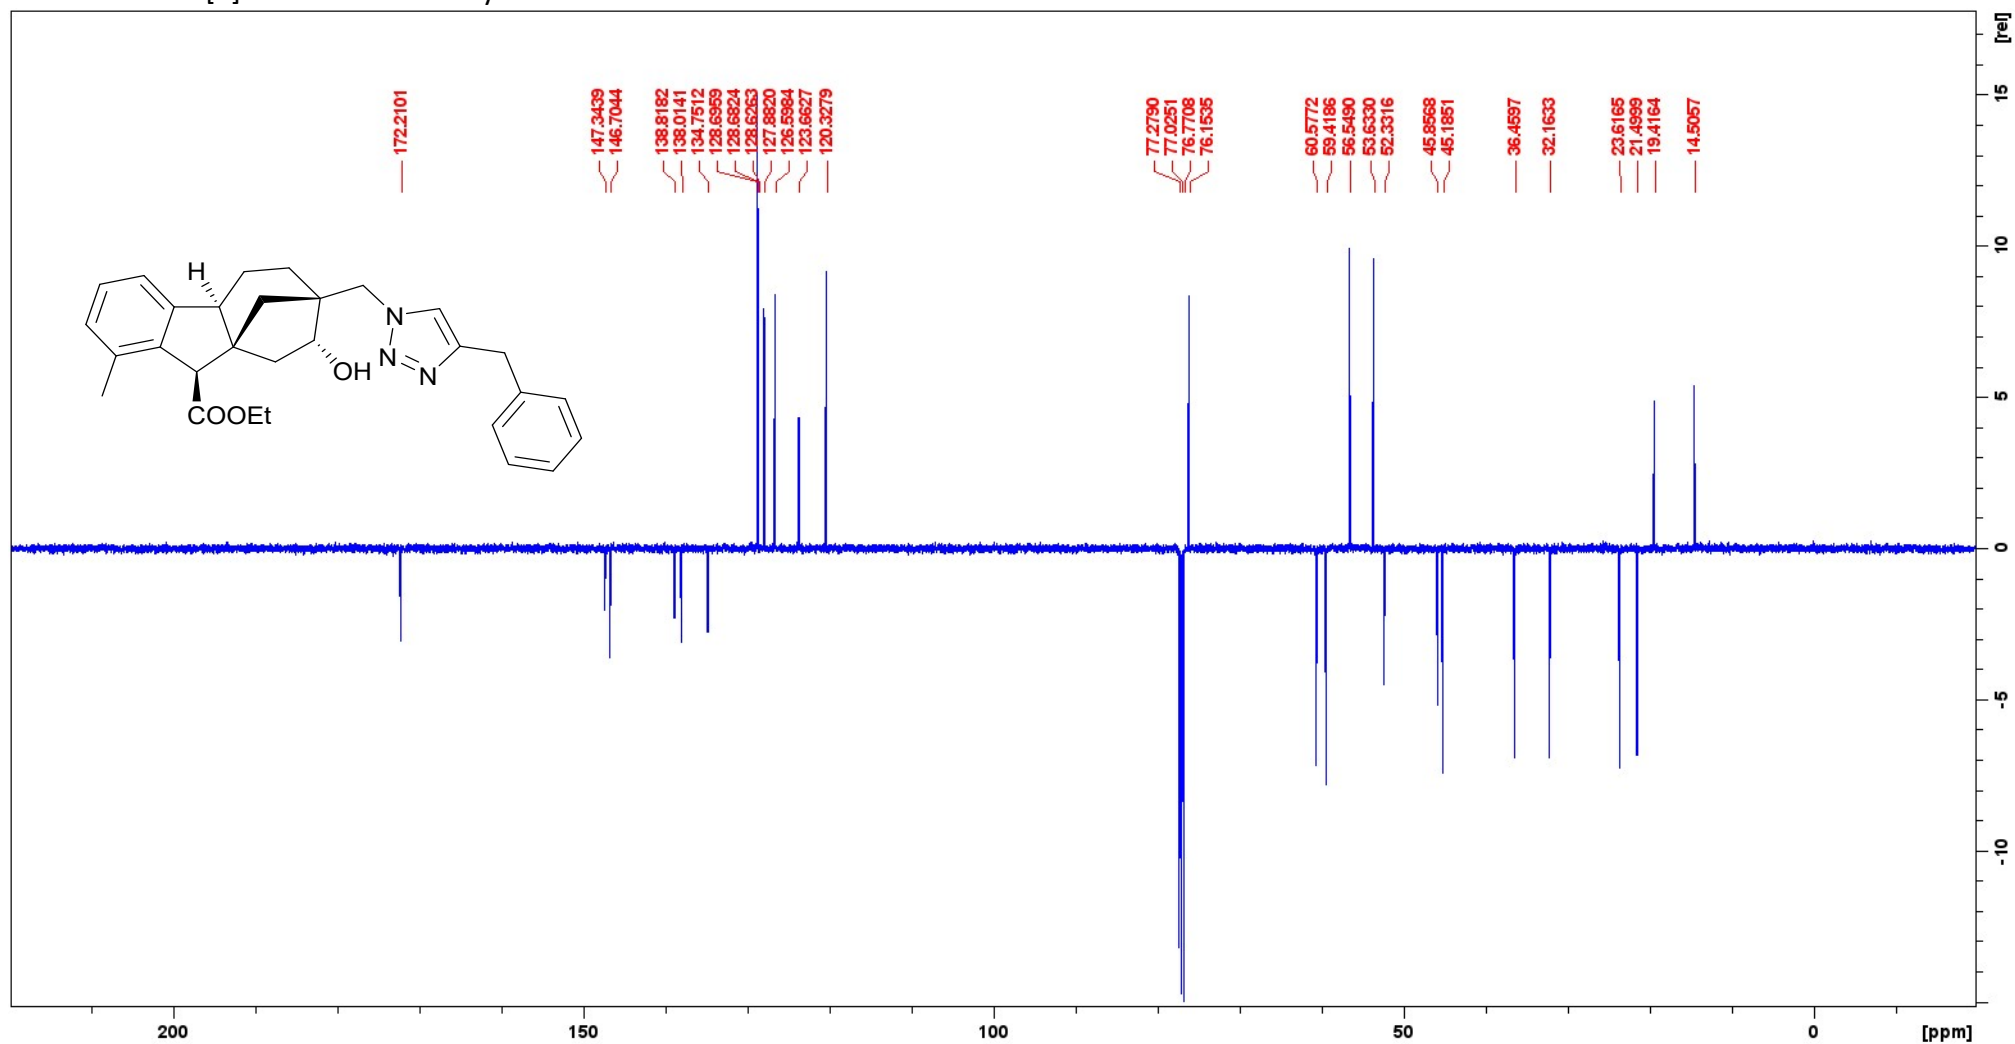

COSY of ethyl (4*S*,7*S*,8*R*,9*aS*,10*R*)-7-((4-benzyl-1*H*-1,2,3-triazol-1-yl)methyl)-8-hydroxy-1-methyl-4*b*,6,7,8,9,10-hexahydro-5*H*-7,9*a*-methanobenzo[*a*]azulene-10-carboxylate **39**

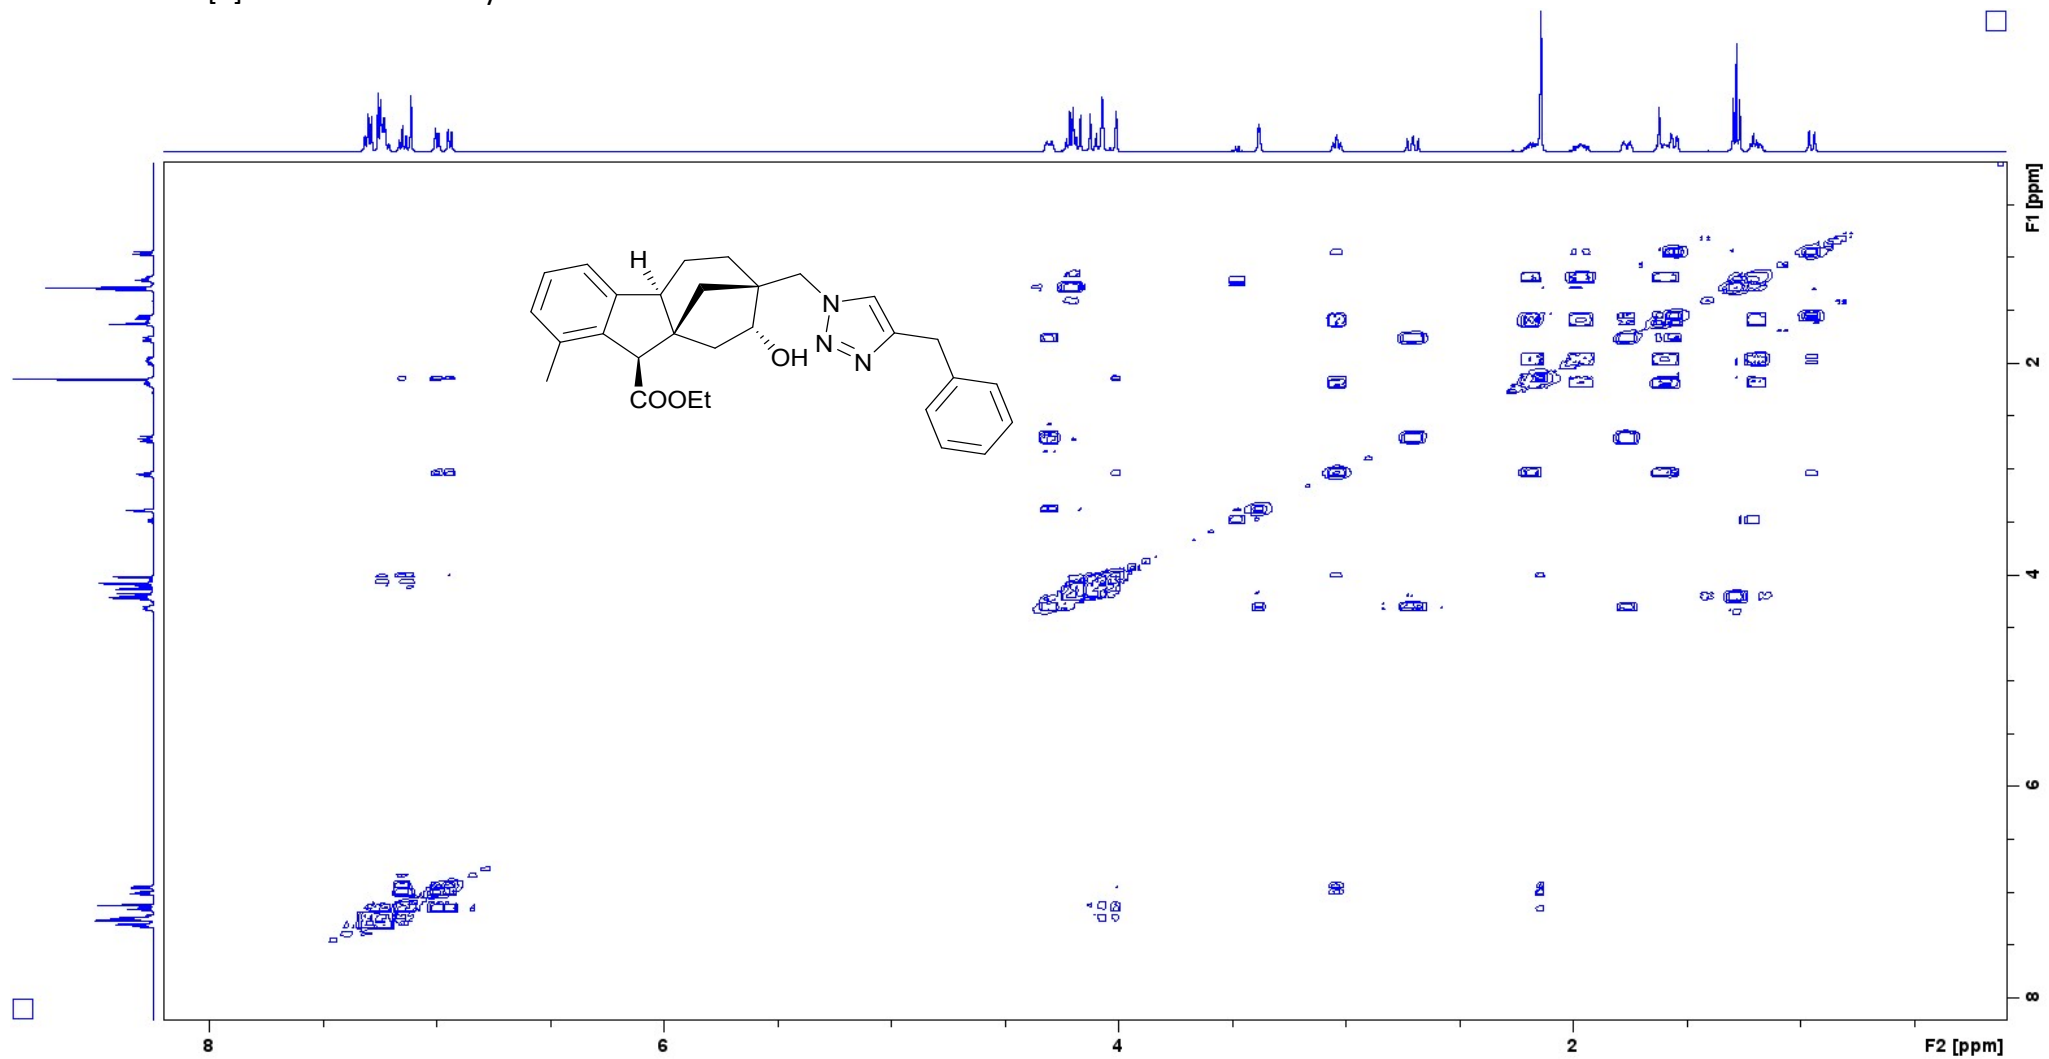

NOESY of ethyl (4*S*,7*S*,8*R*,9*aS*,10*R*)-7-((4-benzyl-1*H*-1,2,3-triazol-1-yl)methyl)-8-hydroxy-1-methyl-4*b*,6,7,8,9,10-hexahydro-5*H*-7,9*a*-methanobenzo[*a*]azulene-10-carboxylate **39**

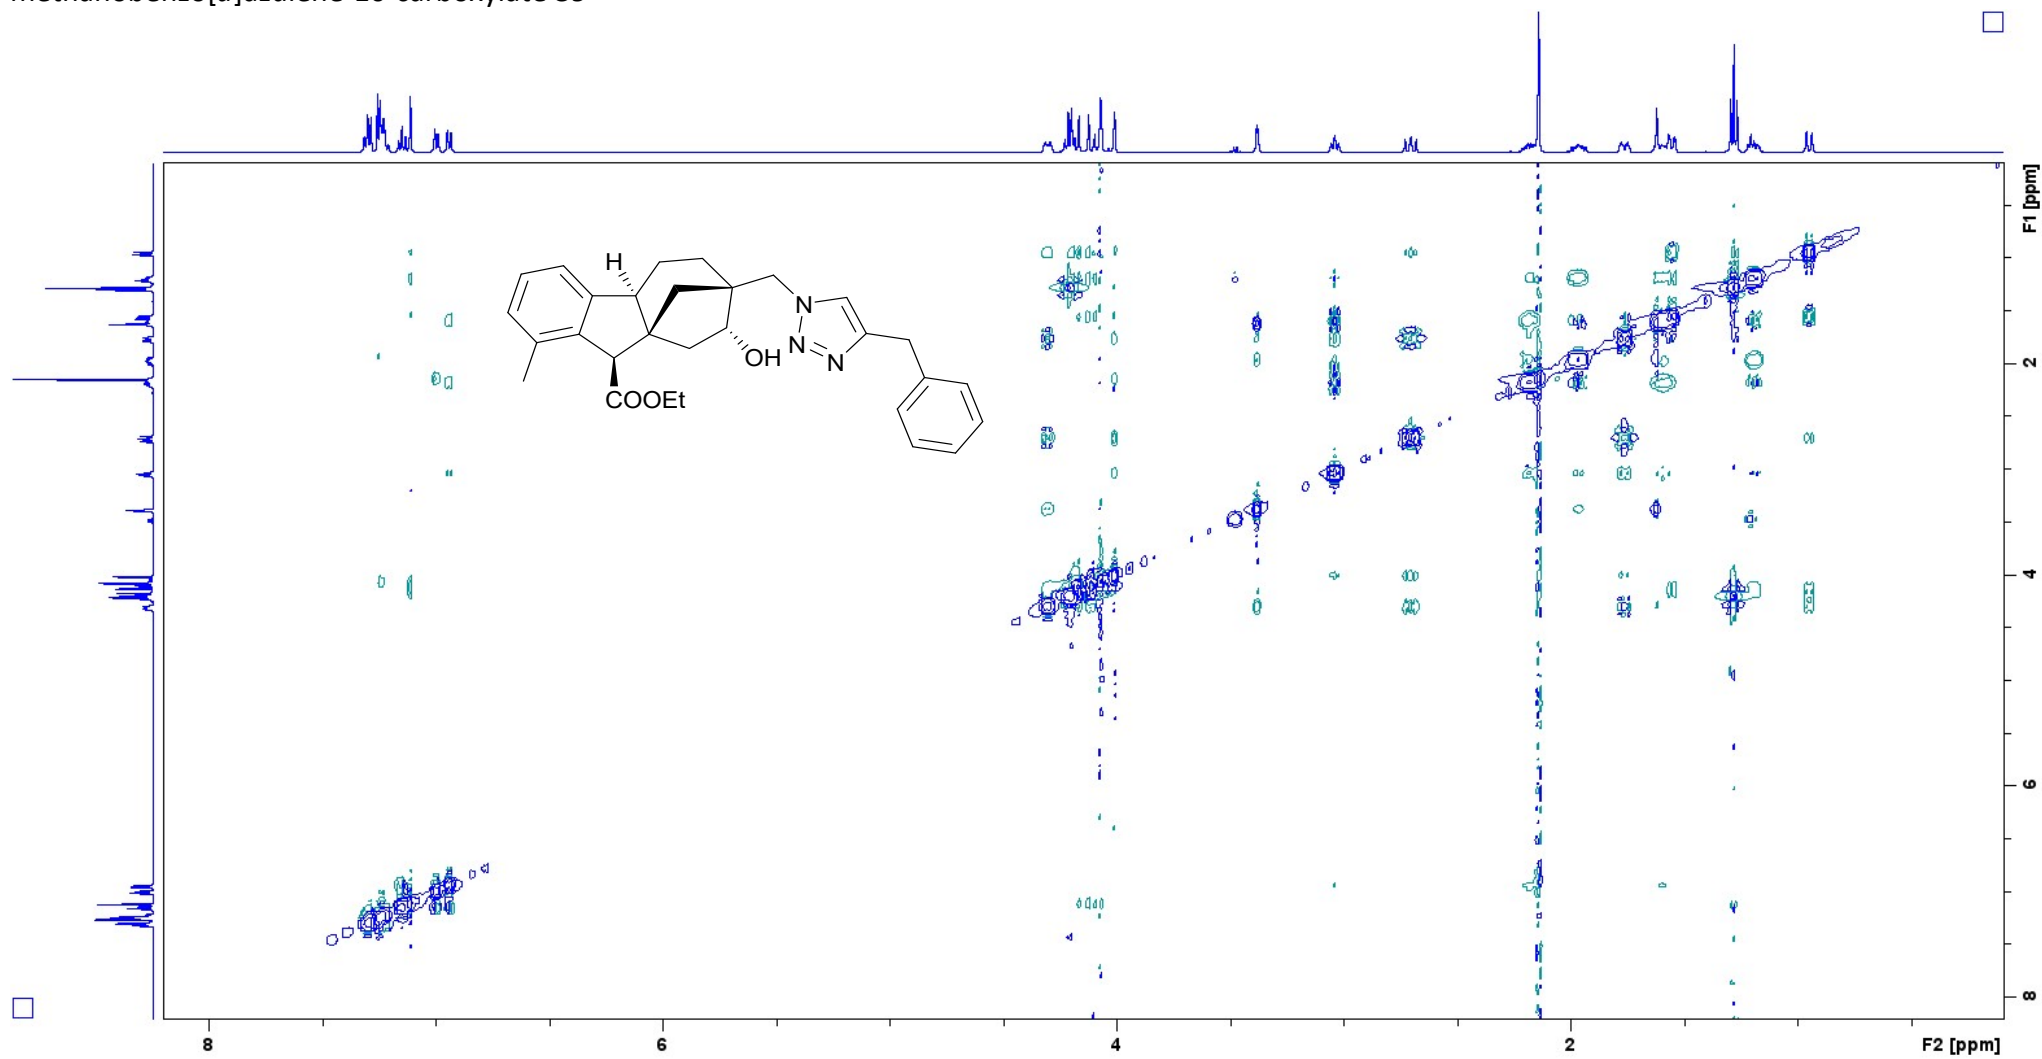

HSQC of ethyl (4*S*,7*S*,8*R*,9*aS*,10*R*)-7-((4-benzyl-1*H*-1,2,3-triazol-1-yl)methyl)-8-hydroxy-1-methyl-4*b*,6,7,8,9,10-hexahydro-5*H*-7,9*a*-methanobenzo[*a*]azulene-10-carboxylate **39**

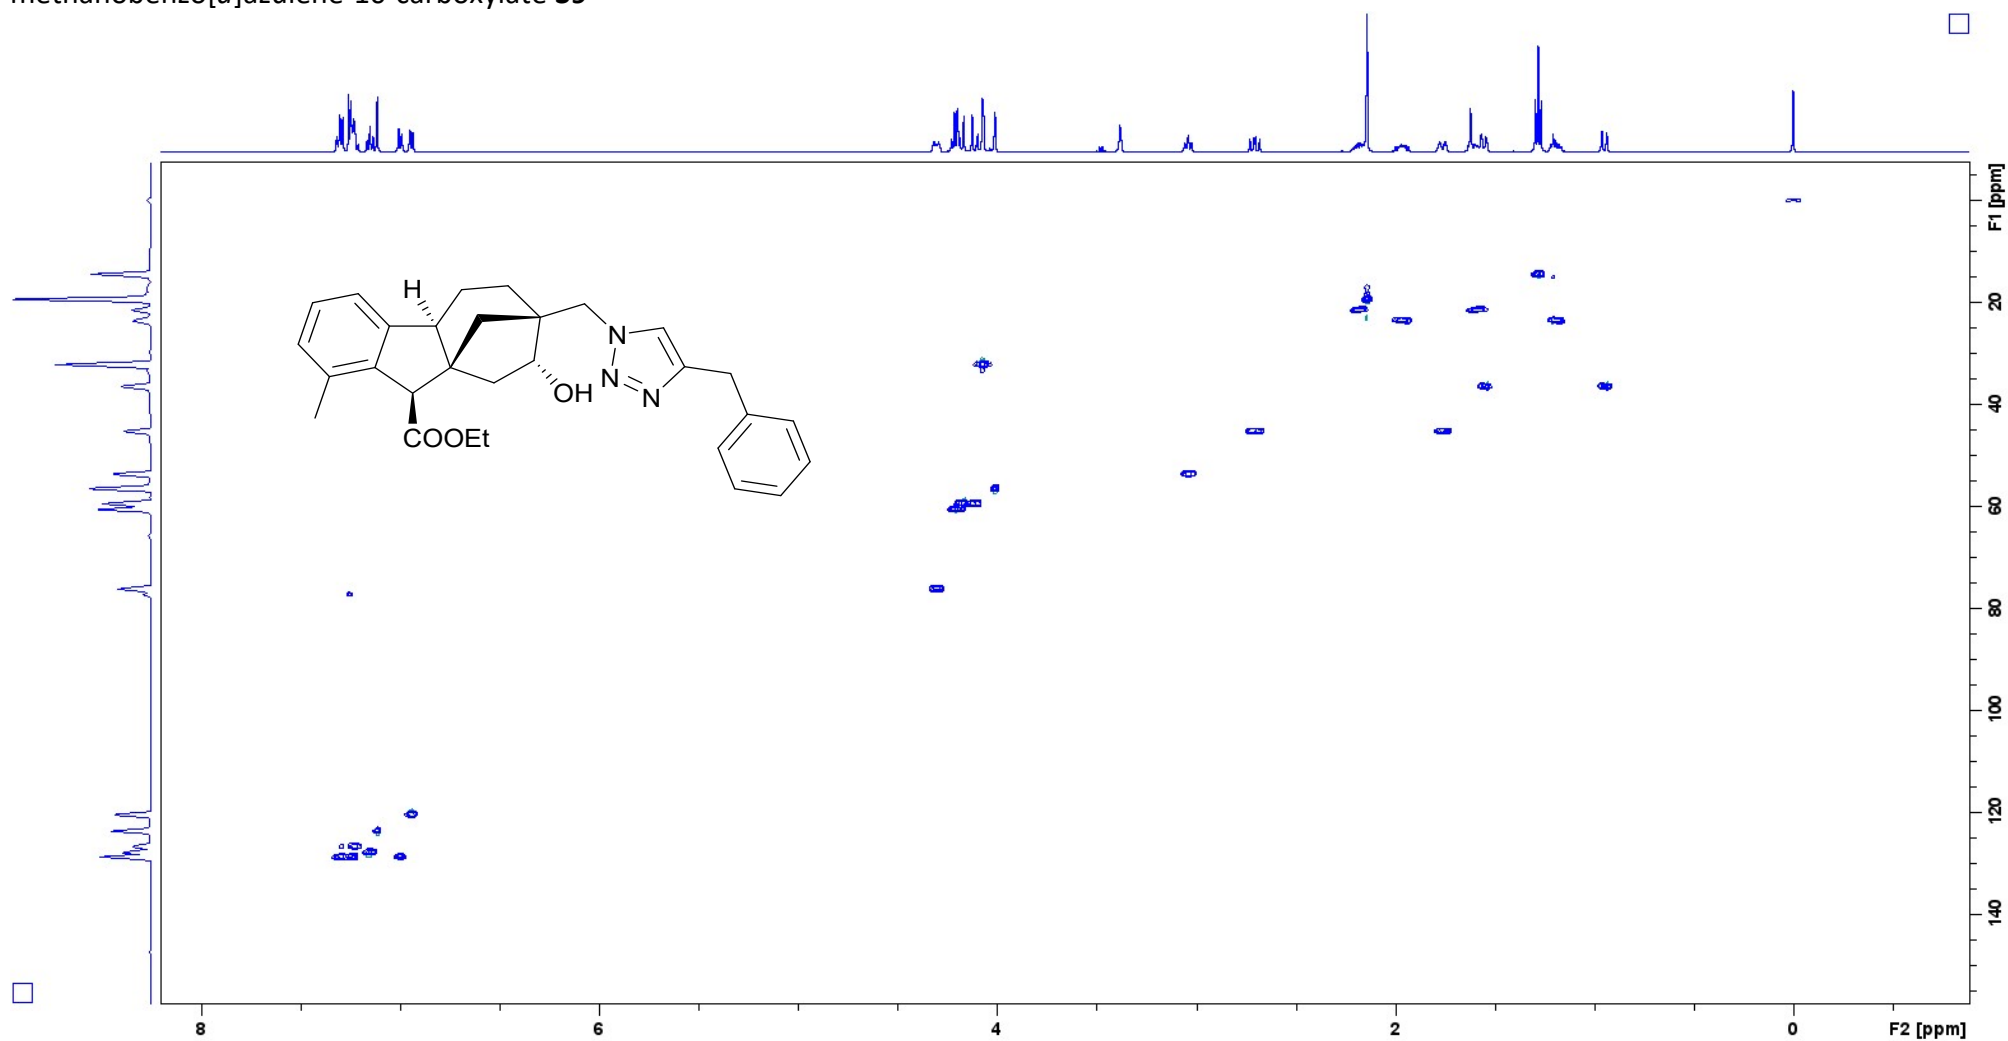



HMBC of ethyl (4*S*,7*S*,8*R*,9*aS*,10*R*)-7-((4-benzyl-1*H*-1,2,3-triazol-1-yl)methyl)-8-hydroxy-1-methyl-4*b*,6,7,8,9,10-hexahydro-5*H*-7,9*a*-methanobenzo[*a*]azulene-10-carboxylate **39**

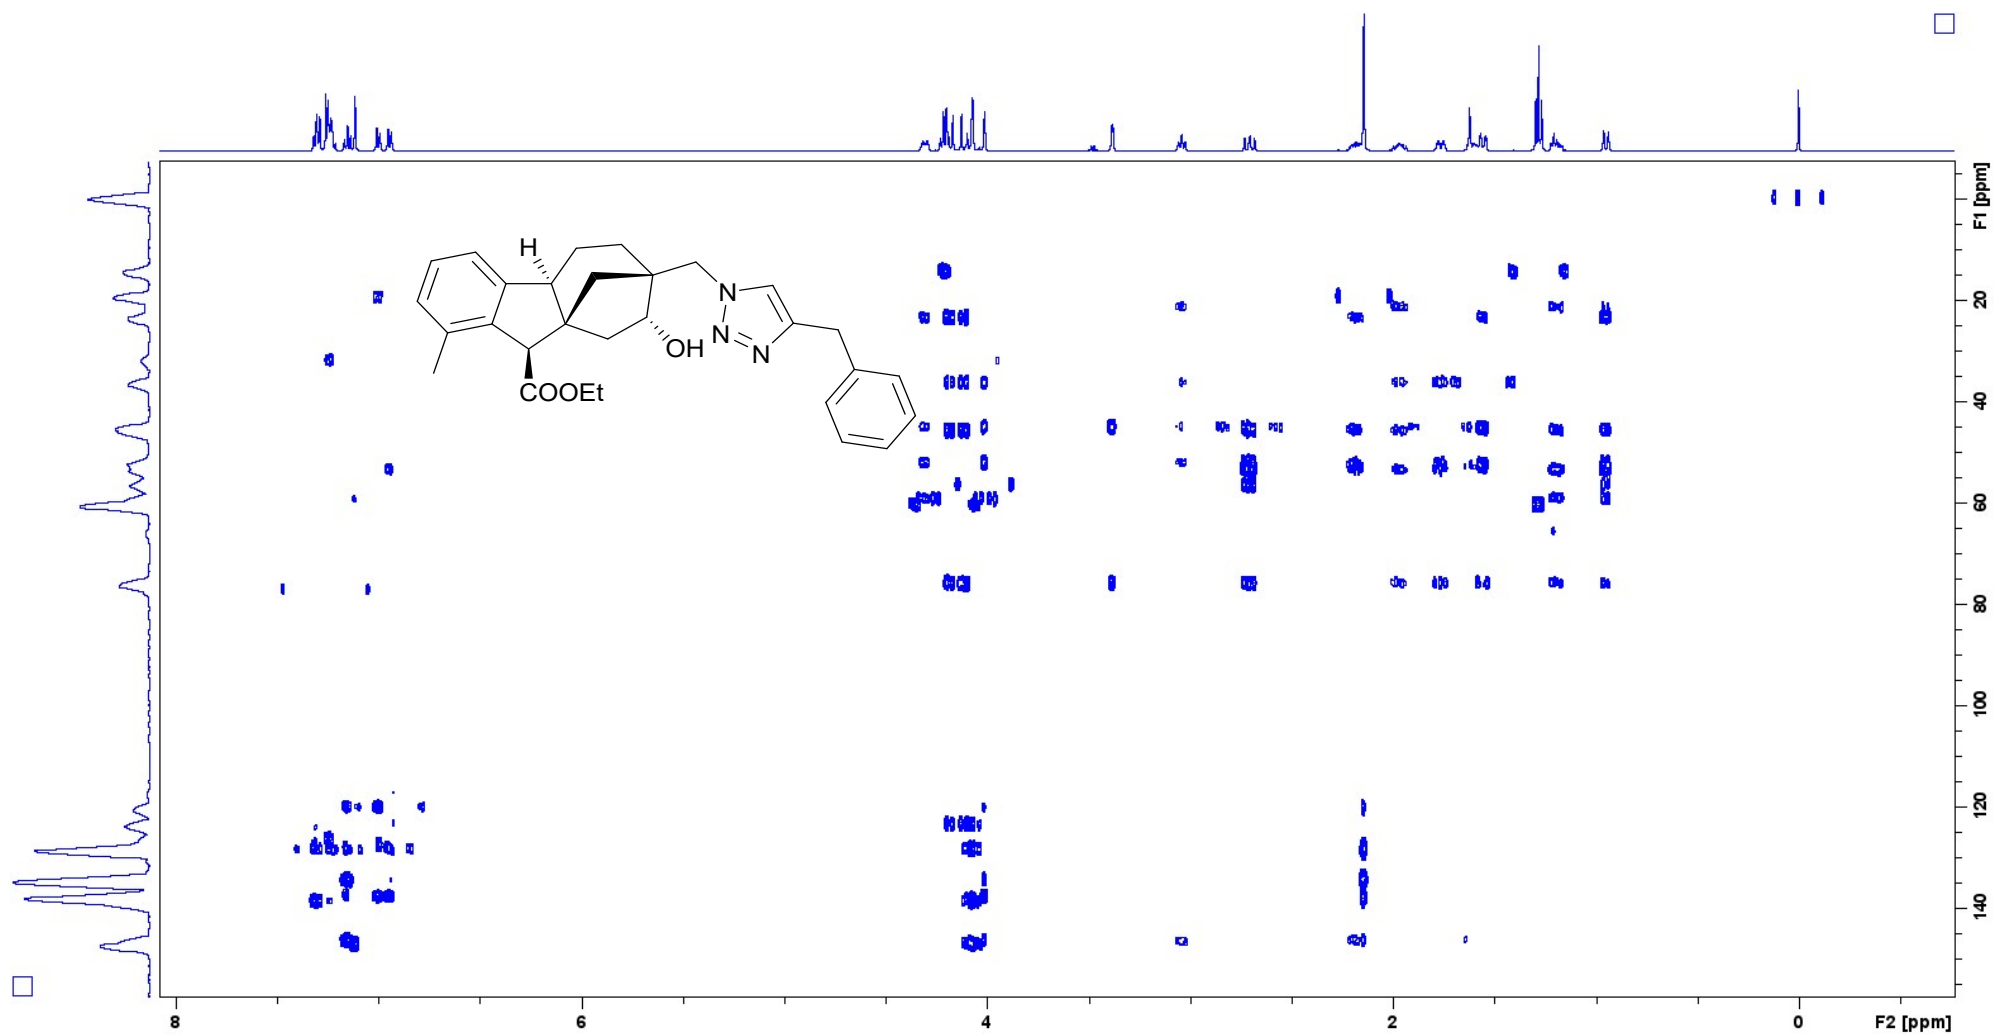

Supplement: d3md00665d1.pdf [file d3md00665d1.pdf]
